# Supplementary material for: A Network Pharmacology Study of the Multi-Targeting Profile of an Antiarrhythmic Chinese Medicine Xin Su Ning
Source: Front Pharmacol. 2019 Sep 25;10:1138. doi: 10.3389/fphar.2019.01138 (PMC6774044; doi:10.3389/fphar.2019.01138)
Supplement: Table S1 — XSN component library. [file Table_1.xlsx]

## Sheet: default
Library_Index	Component_Name	Canonical_Smiles	Herb_Source	Molecular_Weight	Comp_Data_Source	Herb_Weight	Herb_Weight_Ref	Component_Content	pj(OB)	Component_Weight_Coefficient	Comp_Cont_Ref_DOI	AlogP	H-Bond Acceptor	H-Bond Donor	Rotatable Bonds	Applicability Domain	Human_Intestinal_Absorption_(Value)	Human_Intestinal_Absorption_(Probability)	Caco-2_(Value)	Caco-2_(Probability)	Blood_Brain_Barrier_(Value)	Blood_Brain_Barrier_(Probability)	Human_oral_bioavailability_(Value)	Human_oral_bioavailability_(Probability)	Subcellular_localzation_(Value)	Subcellular_localzation_(Probability)	OATP2B1_inhibitior_(Value)	OATP2B1_inhibitior_(Probability)	OATP1B1_inhibitior_(Value)	OATP1B1_inhibitior_(Probability)	OATP1B3_inhibitior_(Value)	OATP1B3_inhibitior_(Probability)	MATE1_inhibitior_(Value)	MATE1_inhibitior_(Probability)	OCT2_inhibitior_(Value)	OCT2_inhibitior_(Probability)	BSEP_inhibitior_(Value)	BSEP_inhibitior_(Probability)	P-glycoprotein_inhibitior_(Value)	P-glycoprotein_inhibitior_(Probability)	P-glycoprotein_substrate_(Value)	P-glycoprotein_substrate_(Probability)	CYP3A4_substrate_(Value)	CYP3A4_substrate_(Probability)	CYP2C9_substrate_(Value)	CYP2C9_substrate_(Probability)	CYP2D6_substrate_(Value)	CYP2D6_substrate_(Probability)	CYP3A4_inhibition_(Value)
MOL003870	gynesine	CN1=CC=CC(=C1)C(=O)[O-]	Banxia	138.144	Database: TCMSP (http://tcmspnw.com)	250	U.S. Patent Application No. 15/573,583.	1e-06	N/A	N/A	N/A					N/A	N/A	N/A	N/A	N/A	N/A	N/A	N/A	N/A	N/A	N/A	N/A	N/A	N/A	N/A	N/A	N/A	N/A	N/A	N/A	N/A	N/A	N/A	N/A	N/A	N/A	N/A	N/A	N/A	N/A	N/A	N/A	N/A	N/A
MOL000024	alpha-humulene	C\C\1=C/CC(C)(C)\C=C\C\C(=C\CC1)\C	Changshan	204.351	Database: TCMSP (http://tcmspnw.com)	250	U.S. Patent Application No. 15/573,583.	1e-06	N/A	N/A	N/A					N/A	N/A	N/A	N/A	N/A	N/A	N/A	N/A	N/A	N/A	N/A	N/A	N/A	N/A	N/A	N/A	N/A	N/A	N/A	N/A	N/A	N/A	N/A	N/A	N/A	N/A	N/A	N/A	N/A	N/A	N/A	N/A	N/A	N/A
MOL003127	Germacrene D	CC(C)[C@@H]1CC\C(=C\CCC(=C)\C=C\1)\C	Changshan	204.351	Database: TCMSP (http://tcmspnw.com)	250	U.S. Patent Application No. 15/573,583.	1e-06	N/A	N/A	N/A					N/A	N/A	N/A	N/A	N/A	N/A	N/A	N/A	N/A	N/A	N/A	N/A	N/A	N/A	N/A	N/A	N/A	N/A	N/A	N/A	N/A	N/A	N/A	N/A	N/A	N/A	N/A	N/A	N/A	N/A	N/A	N/A	N/A	N/A
MOL000286	β-amyrin acetate	CC(=O)O[C@H]1CC[C@@]2(C)[C@H](CC[C@]3(C)[C@@H]2CC=C4[C@H]5CC(C)(C)CC[C@]5(C)CC[C@@]34C)C1(C)C	Fuling	468.754	Database: TCMSP (http://tcmspnw.com)	250	U.S. Patent Application No. 15/573,583.	1e-06	N/A	N/A	N/A					N/A	N/A	N/A	N/A	N/A	N/A	N/A	N/A	N/A	N/A	N/A	N/A	N/A	N/A	N/A	N/A	N/A	N/A	N/A	N/A	N/A	N/A	N/A	N/A	N/A	N/A	N/A	N/A	N/A	N/A	N/A	N/A	N/A	N/A
MOL000301	2-lauroleic acid	CCCCCCCCC\C=C\C(=O)O	Fuling	198.302	Database: TCMSP (http://tcmspnw.com)	250	U.S. Patent Application No. 15/573,583.	1e-06	N/A	N/A	N/A					N/A	N/A	N/A	N/A	N/A	N/A	N/A	N/A	N/A	N/A	N/A	N/A	N/A	N/A	N/A	N/A	N/A	N/A	N/A	N/A	N/A	N/A	N/A	N/A	N/A	N/A	N/A	N/A	N/A	N/A	N/A	N/A	N/A	N/A
MOL001457	columbamine	COC1=C(OC)C2=CN3=C(C=C2C=C1)c4cc(O)c(OC)cc4CC3	Huanglian	339.385	Database: TCMSP (http://tcmspnw.com)	334	U.S. Patent Application No. 15/573,583.	1e-06	N/A	N/A	N/A					N/A	N/A	N/A	N/A	N/A	N/A	N/A	N/A	N/A	N/A	N/A	N/A	N/A	N/A	N/A	N/A	N/A	N/A	N/A	N/A	N/A	N/A	N/A	N/A	N/A	N/A	N/A	N/A	N/A	N/A	N/A	N/A	N/A	N/A
MOL002668	Worenine	CC1=C2c3cc4OCOc4cc3CCN2=Cc5cc6OCOc6cc15	Huanglian	335.353	Database: TCMSP (http://tcmspnw.com)	334	U.S. Patent Application No. 15/573,583.	1e-06	N/A	N/A	N/A					N/A	N/A	N/A	N/A	N/A	N/A	N/A	N/A	N/A	N/A	N/A	N/A	N/A	N/A	N/A	N/A	N/A	N/A	N/A	N/A	N/A	N/A	N/A	N/A	N/A	N/A	N/A	N/A	N/A	N/A	N/A	N/A	N/A	N/A
MOL002891	magnoflorine	COc1ccc2C[C@H]3c4c(CCN3(C)C)cc(OC)c(O)c4c2c1O	Huanglian	343.417	Database: TCMSP (http://tcmspnw.com)	334	U.S. Patent Application No. 15/573,583.	1e-06	N/A	N/A	N/A					N/A	N/A	N/A	N/A	N/A	N/A	N/A	N/A	N/A	N/A	N/A	N/A	N/A	N/A	N/A	N/A	N/A	N/A	N/A	N/A	N/A	N/A	N/A	N/A	N/A	N/A	N/A	N/A	N/A	N/A	N/A	N/A	N/A	N/A
MOL002898	groenlandicine	COc1cc2C3=N(CCc2cc1O)C=C4C(=C3)C=CC5=C4OCO5	Huanglian	323.343	Database: TCMSP (http://tcmspnw.com)	334	U.S. Patent Application No. 15/573,583.	1e-06	N/A	N/A	N/A					N/A	N/A	N/A	N/A	N/A	N/A	N/A	N/A	N/A	N/A	N/A	N/A	N/A	N/A	N/A	N/A	N/A	N/A	N/A	N/A	N/A	N/A	N/A	N/A	N/A	N/A	N/A	N/A	N/A	N/A	N/A	N/A	N/A	N/A
MOL002901	phellodendrine	COc1cc2C[N@H]3(C)CCc4cc(OC)c(O)cc4[C@H]3Cc2cc1O	Huanglian	343.417	Database: TCMSP (http://tcmspnw.com)	334	U.S. Patent Application No. 15/573,583.	1e-06	N/A	N/A	N/A					N/A	N/A	N/A	N/A	N/A	N/A	N/A	N/A	N/A	N/A	N/A	N/A	N/A	N/A	N/A	N/A	N/A	N/A	N/A	N/A	N/A	N/A	N/A	N/A	N/A	N/A	N/A	N/A	N/A	N/A	N/A	N/A	N/A	N/A
MOL000100	isoquercetin_qt	OC1=CC(=C2C(=OC(=C(O)C2=O)c3ccc(O)c(O)c3)C1)O	Qinghao	303.244	Database: TCMSP (http://tcmspnw.com)	250	U.S. Patent Application No. 15/573,583.	1e-06	N/A	N/A	N/A					N/A	N/A	N/A	N/A	N/A	N/A	N/A	N/A	N/A	N/A	N/A	N/A	N/A	N/A	N/A	N/A	N/A	N/A	N/A	N/A	N/A	N/A	N/A	N/A	N/A	N/A	N/A	N/A	N/A	N/A	N/A	N/A	N/A	N/A
MOL000193	(Z)-caryophyllene	C\C\1=C/CCC(=C)[C@H]2CC(C)(C)[C@H]2CC1	Qinghao	204.351	Database: TCMSP (http://tcmspnw.com)	250	U.S. Patent Application No. 15/573,583.	1e-06	N/A	N/A	N/A					N/A	N/A	N/A	N/A	N/A	N/A	N/A	N/A	N/A	N/A	N/A	N/A	N/A	N/A	N/A	N/A	N/A	N/A	N/A	N/A	N/A	N/A	N/A	N/A	N/A	N/A	N/A	N/A	N/A	N/A	N/A	N/A	N/A	N/A
MOL007404	vitexin_qt	OC1=CC2=OC(=CC(=O)C2=C(O)C1)c3ccc(O)cc3	Qinghao	271.245	Database: TCMSP (http://tcmspnw.com)	250	U.S. Patent Application No. 15/573,583.	1e-06	N/A	N/A	N/A					N/A	N/A	N/A	N/A	N/A	N/A	N/A	N/A	N/A	N/A	N/A	N/A	N/A	N/A	N/A	N/A	N/A	N/A	N/A	N/A	N/A	N/A	N/A	N/A	N/A	N/A	N/A	N/A	N/A	N/A	N/A	N/A	N/A	N/A
MOL007423	6,8-di-c-glucosylapigenin_qt	OC1=CC(=C2C(=O)C=C(O=C2C1)c3ccc(O)cc3)O	Qinghao	271.245	Database: TCMSP (http://tcmspnw.com)	250	U.S. Patent Application No. 15/573,583.	1e-06	N/A	N/A	N/A					N/A	N/A	N/A	N/A	N/A	N/A	N/A	N/A	N/A	N/A	N/A	N/A	N/A	N/A	N/A	N/A	N/A	N/A	N/A	N/A	N/A	N/A	N/A	N/A	N/A	N/A	N/A	N/A	N/A	N/A	N/A	N/A	N/A	N/A
MOL007444	isorhamnetin,3-glucoside_qt	COc1cc(ccc1O)C2=C(O)C(=O)C3=C(O)C=C(O)CC3=O2	Qinghao	317.27	Database: TCMSP (http://tcmspnw.com)	250	U.S. Patent Application No. 15/573,583.	1e-06	N/A	N/A	N/A					N/A	N/A	N/A	N/A	N/A	N/A	N/A	N/A	N/A	N/A	N/A	N/A	N/A	N/A	N/A	N/A	N/A	N/A	N/A	N/A	N/A	N/A	N/A	N/A	N/A	N/A	N/A	N/A	N/A	N/A	N/A	N/A	N/A	N/A
qinghao_035	gamma-Caryophyllene	C\C\1=C\CCC(=C)[C@H]2CC(C)(C)[C@@H]2CC1	Qinghao	204.351	Book: Chemical Components of Source Plants in Traditional Chinese Medicine (ISBN: 9787030235534)	250	U.S. Patent Application No. 15/573,583.	1e-06	N/A	N/A	N/A					N/A	N/A	N/A	N/A	N/A	N/A	N/A	N/A	N/A	N/A	N/A	N/A	N/A	N/A	N/A	N/A	N/A	N/A	N/A	N/A	N/A	N/A	N/A	N/A	N/A	N/A	N/A	N/A	N/A	N/A	N/A	N/A	N/A	N/A
qinghao_036	beta-Caryophyllene	C\C\1=C/CCC(=C)[C@H]2CC(C)(C)[C@@H]2CC1	Qinghao	204.351	Book: Chemical Components of Source Plants in Traditional Chinese Medicine (ISBN: 9787030235534)	250	U.S. Patent Application No. 15/573,583.	1e-06	N/A	N/A	N/A					N/A	N/A	N/A	N/A	N/A	N/A	N/A	N/A	N/A	N/A	N/A	N/A	N/A	N/A	N/A	N/A	N/A	N/A	N/A	N/A	N/A	N/A	N/A	N/A	N/A	N/A	N/A	N/A	N/A	N/A	N/A	N/A	N/A	N/A
MOL001641	METHYL LINOLEATE	CCCCC\C=C/C\C=C/CCCCCCCC(=O)OC	Renshen	294.472	Database: TCMSP (http://tcmspnw.com)	250	U.S. Patent Application No. 15/573,583.	1e-06	N/A	N/A	N/A					N/A	N/A	N/A	N/A	N/A	N/A	N/A	N/A	N/A	N/A	N/A	N/A	N/A	N/A	N/A	N/A	N/A	N/A	N/A	N/A	N/A	N/A	N/A	N/A	N/A	N/A	N/A	N/A	N/A	N/A	N/A	N/A	N/A	N/A
renshen_007	Bicyclogermacrene	C\C\1=C/CC\C(=C\[C@@H]2[C@H](CC1)C2(C)C)\C	Renshen	204.351	Book: Chemical Components of Source Plants in Traditional Chinese Medicine (ISBN: 9787030235534)	167	U.S. Patent Application No. 15/573,583.	1e-06	N/A	N/A	N/A					N/A	N/A	N/A	N/A	N/A	N/A	N/A	N/A	N/A	N/A	N/A	N/A	N/A	N/A	N/A	N/A	N/A	N/A	N/A	N/A	N/A	N/A	N/A	N/A	N/A	N/A	N/A	N/A	N/A	N/A	N/A	N/A	N/A	N/A
renshen_015	beta-Caryophyllene	C\C\1=C/CCC(=C)[C@H]2CC(C)(C)[C@@H]2CC1	Renshen	204.351	Book: Chemical Components of Source Plants in Traditional Chinese Medicine (ISBN: 9787030235534)	167	U.S. Patent Application No. 15/573,583.	1e-06	N/A	N/A	N/A					N/A	N/A	N/A	N/A	N/A	N/A	N/A	N/A	N/A	N/A	N/A	N/A	N/A	N/A	N/A	N/A	N/A	N/A	N/A	N/A	N/A	N/A	N/A	N/A	N/A	N/A	N/A	N/A	N/A	N/A	N/A	N/A	N/A	N/A
renshen_085	alpha-Humulene	C\C\1=C\CC(C)(C)\C=C\C\C(=C/CC1)\C	Renshen	204.351	Book: Chemical Components of Source Plants in Traditional Chinese Medicine (ISBN: 9787030235534)	167	U.S. Patent Application No. 15/573,583.	1e-06	N/A	N/A	N/A					N/A	N/A	N/A	N/A	N/A	N/A	N/A	N/A	N/A	N/A	N/A	N/A	N/A	N/A	N/A	N/A	N/A	N/A	N/A	N/A	N/A	N/A	N/A	N/A	N/A	N/A	N/A	N/A	N/A	N/A	N/A	N/A	N/A	N/A
renshen_086	beta-Humulene	C\C\1=C/CC(C)(C)\C=C\CC(=C)CCC1	Renshen	204.351	Book: Chemical Components of Source Plants in Traditional Chinese Medicine (ISBN: 9787030235534)	167	U.S. Patent Application No. 15/573,583.	1e-06	N/A	N/A	N/A					N/A	N/A	N/A	N/A	N/A	N/A	N/A	N/A	N/A	N/A	N/A	N/A	N/A	N/A	N/A	N/A	N/A	N/A	N/A	N/A	N/A	N/A	N/A	N/A	N/A	N/A	N/A	N/A	N/A	N/A	N/A	N/A	N/A	N/A
MOL000193	(Z)-caryophyllene	C\C\1=C/CCC(=C)[C@H]2CC(C)(C)[C@H]2CC1	Zhishi	204.351	Database: TCMSP (http://tcmspnw.com)	167	U.S. Patent Application No. 15/573,583.	1e-06	N/A	N/A	N/A					N/A	N/A	N/A	N/A	N/A	N/A	N/A	N/A	N/A	N/A	N/A	N/A	N/A	N/A	N/A	N/A	N/A	N/A	N/A	N/A	N/A	N/A	N/A	N/A	N/A	N/A	N/A	N/A	N/A	N/A	N/A	N/A	N/A	N/A
MOL000347	Syrigin	COc1cc(\C=C\CO)cc(OC)c1O[C@@H]2O[C@H](CO)[C@@H](O)[C@H](O)[C@H]2O	Zhishi	372.367	Database: TCMSP (http://tcmspnw.com)	167	U.S. Patent Application No. 15/573,583.	1e-06	N/A	N/A	N/A					N/A	N/A	N/A	N/A	N/A	N/A	N/A	N/A	N/A	N/A	N/A	N/A	N/A	N/A	N/A	N/A	N/A	N/A	N/A	N/A	N/A	N/A	N/A	N/A	N/A	N/A	N/A	N/A	N/A	N/A	N/A	N/A	N/A	N/A
MOL012644	caryophellene	C\C\1=C\CCC(=C)[C@H]2CC(C)(C)[C@H]2CC1	Zhishi	204.351	Database: TCMSP (http://tcmspnw.com)	167	U.S. Patent Application No. 15/573,583.	1e-06	N/A	N/A	N/A					N/A	N/A	N/A	N/A	N/A	N/A	N/A	N/A	N/A	N/A	N/A	N/A	N/A	N/A	N/A	N/A	N/A	N/A	N/A	N/A	N/A	N/A	N/A	N/A	N/A	N/A	N/A	N/A	N/A	N/A	N/A	N/A	N/A	N/A
huanglian_001	Berberine	COc1ccc2cc3c4cc5OCOc5cc4CC[n+]3cc2c1OC	Huanglian	336.361	Book: Chemical Components of Source Plants in Traditional Chinese Medicine (ISBN: 9787030235534)	334	U.S. Patent Application No. 15/573,583.	0.0681	0.4857	13817.4	10.3969/j.issn.1008-9926.2006.04.012	3.10	4	0	2	In domain	+	0.7733	+	0.9418	+	0.9847	-	0.5143	Mitochondria	0.4894	-	1.0000	+	0.9399	+	0.9458	-	0.7800	-	0.5348	+	0.8318	+	0.6872	-	0.7450	+	0.5449	-	0.8153	-	0.7038	-
huanglian_004	Coptisine	C1Oc2cc3CC[n+]4cc5c6OCOc6ccc5cc4c3cc2O1	Huanglian	320.319	Book: Chemical Components of Source Plants in Traditional Chinese Medicine (ISBN: 9787030235534)	334	U.S. Patent Application No. 15/573,583.	0.0219	0.5	4803.4	10.3321/j.issn:1001-5302.2005.07.004	2.81	4	0	0	In domain	+	0.7197	+	0.9313	+	0.9821	-	0.5000	Mitochondria	0.6451	-	1.0000	+	0.9184	+	0.9467	-	0.8600	-	0.5348	+	0.7721	+	0.6510	-	0.8703	-	0.5222	-	0.6048	-	0.7534	-
kushen_061	Oxymatrine	[O-][N@@+]12CCC[C@H]3CN4[C@H](CCCC4=O)[C@@H](CCC1)[C@@H]23	Kushen	264.363	Book: Chemical Components of Source Plants in Traditional Chinese Medicine (ISBN: 9787030235534)	250	U.S. Patent Application No. 15/573,583.	0.01457	0.7857	4554.35	10.3969/j.issn.1672-7916.2009.05.010	1.88	2	0	0	In domain	+	0.8326	+	0.6933	+	0.9860	+	0.7857	Mitochondria	0.5182	-	0.8546	+	0.9293	+	0.9436	-	0.9400	+	0.6000	-	0.7426	-	0.9404	-	0.7675	+	0.5095	-	0.5898	-	0.8403	-
huanglian_012	Palmatine	COC1=C(C2=C[N+]3=C(C=C2C=C1)C4=CC(=C(C=C4CC3)OC)OC)OC	Huanglian	352.404	Book: Chemical Components of Source Plants in Traditional Chinese Medicine (ISBN: 9787030235534)	334	U.S. Patent Application No. 15/573,583.	0.0149	0.6714	3988.82	10.3969/j.issn.1008-9926.2006.04.012	3.38	4	0	4	In domain	+	0.8002	+	0.9593	+	0.9103	+	0.6714	Mitochondria	0.5889	-	0.8900	+	0.9413	+	0.9524	-	0.8200	+	0.5750	+	0.8009	+	0.7382	-	0.5988	+	0.5332	-	0.8233	+	0.3791	-
kushen_079	Oxysophocarpine	C1C[C@H]2CN3[C@H](CC=CC3=O)[C@@H]4[C@H]2[N@@+](C1)(CCC4)[O-]	Kushen	262.347	Book: Chemical Components of Source Plants in Traditional Chinese Medicine (ISBN: 9787030235534)	250	U.S. Patent Application No. 15/573,583.	0.01104	0.7571	3350.86	10.3969/j.issn.1008-049X.2017.01.016	1.66	2	0	0	In domain	+	0.8891	+	0.8166	+	0.9839	+	0.7571	Plasma membrane	0.4741	-	0.8552	+	0.9276	+	0.9427	-	0.9800	+	0.6000	-	0.7548	-	0.9485	-	0.7097	+	0.5370	-	1.0000	-	0.8767	-
huanglian_008	Jatrorrhizine	COc1cc2c(CC[n+]3cc4c(OC)c(OC)ccc4cc23)cc1O	Huanglian	338.377	Book: Chemical Components of Source Plants in Traditional Chinese Medicine (ISBN: 9787030235534)	334	U.S. Patent Application No. 15/573,583.	0.0126	0.6	3139.34	10.3969/j.issn.1008-9926.2006.04.012	3.08	4	1	3	In domain	+	0.7947	+	0.9270	+	0.9060	+	0.6000	Mitochondria	0.6307	-	0.8757	+	0.9321	+	0.9488	-	0.7800	+	0.5750	+	0.7120	-	0.5595	-	0.6983	+	0.5398	-	0.8169	+	0.3688	-
qinghao_009	artemisinin	C[C@@H]1CC[C@H]2[C@@H](C)C(=O)O[C@@H]3O[C@@]4(C)CC[C@@H]1[C@@]23OO4	Qinghao	282.332	Book: Chemical Components of Source Plants in Traditional Chinese Medicine (ISBN: 9787030235534)	250	U.S. Patent Application No. 15/573,583.	0.00823	0.8429	2584.2	10.3321/j.issn:0513-4870.2007.09.013	2.39	5	0	0	In domain	+	0.8893	+	0.9313	+	0.9416	+	0.8429	Mitochondria	0.5202	-	0.8545	+	0.9414	+	0.9703	-	0.9400	-	0.8750	-	0.8913	-	0.8249	-	0.9362	+	0.7425	-	1.0000	-	0.8231	-
huanglian_006	Epiberberine	COc1cc2CC[n+]3cc4c5OCOc5ccc4cc3c2cc1OC	Huanglian	336.361	Book: Chemical Components of Source Plants in Traditional Chinese Medicine (ISBN: 9787030235534)	334	U.S. Patent Application No. 15/573,583.	0.008	0.6	2005.18	10.3321/j.issn:1001-5302.2005.07.004	3.10	4	0	2	In domain	+	0.7733	+	0.9645	+	0.9847	+	0.6000	Mitochondria	0.4894	-	1.0000	+	0.9103	+	0.9458	-	0.7800	-	0.5348	+	0.8484	+	0.7556	-	0.6888	+	0.5663	-	0.8153	-	0.7038	-
gancao_033	Glycyrrhizic acid	CC1(C)[C@H](CC[C@@]2(C)[C@H]1CC[C@]3(C)[C@@H]2C(=O)C=C4[C@@H]5C[C@](C)(CC[C@]5(C)CC[C@@]34C)C(=O)O)O[C@@H]6O[C@@H]([C@@H](O)[C@H](O)[C@H]6O[C@@H]7O[C@@H]([C@@H](O)[C@H](O)[C@H]7O)C(=O)O)C(=O)O	Gancao	822.932	Book: Chemical Components of Source Plants in Traditional Chinese Medicine (ISBN: 9787030235534)	167	U.S. Patent Application No. 15/573,583.	0.0472	0.3714	1496.61	10.3969/j.issn.1673-4890.2012.09.005	2.25	13	8	7	Warning	+	0.8215	-	0.8793	-	0.8852	-	0.6286	Mitochondria	0.8383	-	1.0000	-	0.4761	-	0.3963	-	1.0000	+	0.6929	+	0.6059	+	0.7608	-	0.7951	+	0.7215	-	0.7908	-	0.8981	-
maidong_035	Ruscogenin	C[C@@H]1CC[C@@]2(OC1)O[C@H]3C[C@H]4[C@@H]5CC=C6C[C@@H](O)C[C@@H](O)[C@]6(C)[C@H]5CC[C@]4(C)[C@H]3[C@@H]2C	Maidong	430.62	Book: Chemical Components of Source Plants in Traditional Chinese Medicine (ISBN: 9787030235534)	250	U.S. Patent Application No. 15/573,583.	0.012	0.4429	1298.09	10.3969/j.issn.1008-0805.2005.12.007	4.68	4	2	0	In domain	+	0.9482	-	0.5959	-	0.3557	-	0.5571	Mitochondria	0.6377	-	0.7145	+	0.9087	+	0.9747	-	0.9200	-	0.6250	+	0.8537	-	0.5834	+	0.5264	+	0.7237	-	0.8006	-	0.7501	-
kushen_073	Sophoranol N-oxide	O[C@@]12CCC[N@@+]3([O-])CCC[C@@H]([C@H]4CCCC(=O)N4C1)[C@H]23	Kushen	280.363	Book: Chemical Components of Source Plants in Traditional Chinese Medicine (ISBN: 9787030235534)	250	U.S. Patent Application No. 15/573,583.	0.00407	0.7	1068.77	10.3969/j.issn.1008-049X.2017.01.016	1.00	3	1	0	In domain	+	0.8168	+	0.5975	+	0.9753	+	0.7000	Mitochondria	0.6114	-	0.8573	+	0.9390	+	0.9423	-	0.9000	-	0.6500	-	0.8177	-	0.9382	-	0.8364	+	0.5725	-	0.5947	-	0.8442	-
zhishi_005	Limonin	CC1(C)O[C@H]2CC(=O)OC[C@]23[C@H]4CC[C@@]5(C)[C@@H](OC(=O)[C@H]6O[C@@]56[C@]4(C)C(=O)C[C@@H]13)c7cocc7	Zhishi	470.512	Book: Chemical Components of Source Plants in Traditional Chinese Medicine (ISBN: 9787030235534)	167	U.S. Patent Application No. 15/573,583.	0.0087	0.5857	760.872	10.3969/j.issn.1006-2513.2011.05.017	3.14	8	0	1	In domain	+	0.9749	-	0.7064	+	0.9674	+	0.5857	Mitochondria	0.8017	-	1.0000	+	0.8567	+	0.9807	-	0.9200	-	0.7500	+	0.9293	+	0.7047	-	0.5097	+	0.6615	-	0.6043	-	0.8231	+
zhishi_013	Synephrine	CNC[C@H](O)c1ccc(O)cc1	Zhishi	167.205	Book: Chemical Components of Source Plants in Traditional Chinese Medicine (ISBN: 9787030235534)	167	U.S. Patent Application No. 15/573,583.	0.00585	0.2857	702.27	10.3321/j.issn:1001-5302.2006.17.008	0.65	3	3	3	In domain	+	0.9860	+	0.6864	-	0.9821	-	0.7143	Mitochondria	0.4885	-	0.8645	+	0.8702	+	0.9562	-	1.0000	-	0.8500	-	0.9827	-	0.9732	-	0.8579	-	0.7466	-	1.0000	+	0.5676	-
kushen_074	Sophoridine	O=C1CCC[C@@H]2[C@H]3CCCN4CCC[C@H](CN12)[C@@H]34	Kushen	248.364	Book: Chemical Components of Source Plants in Traditional Chinese Medicine (ISBN: 9787030235534)	250	U.S. Patent Application No. 15/573,583.	0.00214	0.7	634.358	10.3969/j.issn.1008-049X.2017.01.016	1.87	2	0	0	In domain	+	0.9530	+	0.8266	+	0.9953	+	0.7000	Mitochondria	0.6616	-	0.8557	+	0.9438	+	0.9531	-	0.8000	+	0.8500	-	0.6531	-	0.9402	-	0.7968	-	0.5197	-	0.6276	+	0.4366	-
gancao_072	Liquiritin	OC[C@H]1O[C@@H](Oc2ccc(cc2)[C@@H]3CC(=O)c4ccc(O)cc4O3)[C@H](O)[C@@H](O)[C@@H]1O	Gancao	418.394	Book: Chemical Components of Source Plants in Traditional Chinese Medicine (ISBN: 9787030235534)	167	U.S. Patent Application No. 15/573,583.	0.027835	0.1286	601.082	10.3969/j.issn.1673-4890.2012.09.005	0.28	9	5	4	In domain	+	0.6733	-	0.9372	-	0.9152	-	0.8714	Mitochondria	0.6068	-	0.8544	+	0.9043	+	0.9265	-	0.9600	-	0.7750	-	0.6333	-	0.6621	-	0.8545	+	0.6026	-	1.0000	-	0.8143	-
zhishi_017	Hesperidin	C[C@H]1[C@@H]([C@H]([C@H]([C@@H](O1)OC[C@@H]2[C@H]([C@@H]([C@H]([C@@H](O2)OC3=CC(=C4C(=O)C[C@H](OC4=C3)C5=CC(=C(C=C5)OC)O)O)O)O)O)O)O)O	Zhishi	610.561	Book: Chemical Components of Source Plants in Traditional Chinese Medicine (ISBN: 9787030235534)	167	U.S. Patent Application No. 15/573,583.	0.0301	0.1714	593.657	10.3321/j.issn:1001-5302.2006.17.008	-1.16	15	8	7	Warning	+	0.8161	-	0.8816	-	0.9570	-	0.8286	Mitochondria	0.6902	-	0.8556	+	0.9414	+	0.9479	-	0.9600	-	0.8250	+	0.7312	-	0.9166	-	0.5059	+	0.6304	-	1.0000	-	0.8428	-
kushen_064	Sophocarpine	O=C1C=CC[C@@H]2[C@H]3CCCN4CCC[C@@H](CN12)[C@@H]34	Kushen	246.348	Book: Chemical Components of Source Plants in Traditional Chinese Medicine (ISBN: 9787030235534)	250	U.S. Patent Application No. 15/573,583.	0.00143	0.6714	409.901	10.3969/j.issn.1008-049X.2017.01.016	1.65	2	0	0	In domain	+	0.9745	+	0.9200	+	0.9888	+	0.6714	Mitochondria	0.5101	-	0.8585	+	0.9421	+	0.9518	-	0.9209	+	0.8250	-	0.7512	-	0.9482	-	0.7438	+	0.5118	-	1.0000	-	0.7702	-
kushen_053	Matrine	O=C1CCC[C@@H]2[C@H]3CCCN4CCC[C@@H](CN12)[C@@H]34	Kushen	248.364	Book: Chemical Components of Source Plants in Traditional Chinese Medicine (ISBN: 9787030235534)	250	U.S. Patent Application No. 15/573,583.	0.00115	0.7	340.893	10.3969/j.issn.1672-7916.2009.05.010	1.87	2	0	0	In domain	+	0.9530	+	0.8266	+	0.9953	+	0.7000	Mitochondria	0.6616	-	0.8557	+	0.9438	+	0.9531	-	0.8000	+	0.8500	-	0.6531	-	0.9402	-	0.7968	-	0.5197	-	0.6276	+	0.4366	-
fuling_019	Pachymic acid	CC(C)C(=C)CC[C@H]([C@H]1[C@H](O)C[C@@]2(C)C3=C(CC[C@]12C)[C@@]4(C)CC[C@H](OC(=O)C)C(C)(C)[C@@H]4CC3)C(=O)O	Fuling	528.763	Book: Chemical Components of Source Plants in Traditional Chinese Medicine (ISBN: 9787030235534)	250	U.S. Patent Application No. 15/573,583.	0.002931	0.4714	274.824	10.3969/j.issn.1008-987x.2015.05.14	7.33	4	2	7	In domain	+	0.9787	-	0.8127	-	0.9405	-	0.5286	Mitochondria	0.8684	-	0.7108	-	0.3218	-	0.6172	-	0.9800	-	0.6782	+	0.8008	+	0.6265	-	0.6766	+	0.6924	-	1.0000	-	0.8675	-
kushen_072	Sophoranol	O[C@]12CCCN3CCC[C@H]([C@H]4CCCC(=O)N4C1)[C@H]23	Kushen	264.363	Book: Chemical Components of Source Plants in Traditional Chinese Medicine (ISBN: 9787030235534)	250	U.S. Patent Application No. 15/573,583.	0.00123	0.4857	237.675	10.3969/j.issn.1008-049X.2017.01.016	0.99	3	1	0	In domain	+	0.9393	+	0.7078	+	0.9879	-	0.5143	Mitochondria	0.7412	-	0.8565	+	0.9166	+	0.9516	-	0.9200	+	0.6250	-	0.6595	-	0.9427	-	0.8247	+	0.5645	-	0.8056	+	0.3748	-
zhishi_008	Naringin	C[C@@H]1O[C@@H](O[C@@H]2[C@@H](O)[C@H](O)[C@@H](CO)O[C@H]2Oc3cc(O)c4C(=O)C[C@H](Oc4c3)c5ccc(O)cc5)[C@H](O)[C@H](O)[C@H]1O	Zhishi	580.535	Book: Chemical Components of Source Plants in Traditional Chinese Medicine (ISBN: 9787030235534)	167	U.S. Patent Application No. 15/573,583.	0.0977	0.0143	169.079	10.3321/j.issn:1001-5302.2006.17.008	-1.17	14	8	6	Warning	+	0.7531	-	0.9102	-	0.9393	-	0.9857	Mitochondria	0.6881	-	0.8517	+	0.9413	+	0.9552	-	0.9400	-	0.7750	-	0.4758	-	0.9165	-	0.6697	+	0.6479	-	1.0000	-	0.8479	-
gancao_069	Liquiritigenin	Oc1ccc(cc1)[C@@H]2CC(=O)c3ccc(O)cc3O2	Gancao	256.253	Book: Chemical Components of Source Plants in Traditional Chinese Medicine (ISBN: 9787030235534)	167	U.S. Patent Application No. 15/573,583.	0.001629	0.3429	153.146	10.3969/j.issn.1673-4890.2012.09.005	2.80	4	2	1	In domain	+	0.9947	-	0.7591	-	0.6880	-	0.6571	Mitochondria	0.8241	-	0.6348	+	0.8593	+	0.9756	-	0.9800	-	0.9500	-	0.8490	-	0.9166	-	0.9037	-	0.5451	-	1.0000	+	0.3531	+
renshen_055	Ginsenoside Rd	[O-][N+](=O)c1ccc(Cl)c(c1)C(=O)OCC(=O)Nc2cccc(Cl)c2Cl	Renshen	403.601	Book: Chemical Components of Source Plants in Traditional Chinese Medicine (ISBN: 9787030235534)	167	U.S. Patent Application No. 15/573,583.	0.00104	0.6857	124.137	10.3969/j.issn.1001-4721.2013.04.015	4.35	5	1	5	In domain	+	0.8451	-	0.6788	+	0.9659	+	0.6857	Mitochondria	0.7569	-	0.8621	+	0.8602	+	0.9302	-	0.9200	-	0.9000	+	0.9057	-	0.8221	-	0.8678	+	0.6333	-	0.8148	-	0.8753	-
renshen_058	Ginsenoside Rg1	CC(=CCC[C@](C)(O[C@H]1O[C@@H](CO)[C@@H](O)[C@H](O)[C@H]1O)[C@H]2CC[C@]3(C)[C@@H]2[C@H](O)C[C@@H]4[C@@]5(C)CC[C@H](O)C(C)(C)[C@@H]5[C@H](C[C@@]34C)O[C@@H]6O[C@H](CO)[C@@H](O)[C@H](O)[C@H]6O)C	Renshen	801.013	Book: Chemical Components of Source Plants in Traditional Chinese Medicine (ISBN: 9787030235534)	167	U.S. Patent Application No. 15/573,583.	0.00551	0.2429	117.389	10.3969/j.issn.1001-4721.2013.04.015	1.12	14	10	10	Warning	-	0.6476	-	0.8777	-	0.2765	-	0.7571	Mitochondria	0.7251	-	1.0000	+	0.8365	+	0.8189	-	0.9612	-	0.6000	-	0.6952	+	0.7727	-	0.7017	+	0.7173	-	0.8025	-	0.8264	-
gancao_043	Isoliquiritin	OC[C@H]1O[C@@H](Oc2ccc(\C=C\C(=O)c3ccc(O)cc3O)cc2)[C@H](O)[C@@H](O)[C@@H]1O	Gancao	418.394	Book: Chemical Components of Source Plants in Traditional Chinese Medicine (ISBN: 9787030235534)	167	U.S. Patent Application No. 15/573,583.	0.0032	0.2	107.469	10.3969/j.issn.1673-4890.2012.09.005	0.17	9	6	6	In domain	+	0.6646	-	0.9019	-	0.6953	-	0.8000	Mitochondria	0.6013	-	0.5645	+	0.9307	+	0.9479	-	0.8800	-	0.7750	-	0.6496	-	0.6883	-	0.9045	+	0.5405	-	1.0000	-	0.8653	-
lianzixin_009	Nuciferine	COc1cc2CCN(C)[C@@H]3Cc4ccccc4c(c1OC)c23	Lianzixin	295.376	Book: Chemical Components of Source Plants in Traditional Chinese Medicine (ISBN: 9787030235534)	42	U.S. Patent Application No. 15/573,583.	0.004047	0.4286	103.76	10.3969/j.issn.1008-0805.2005.12.007	3.46	3	0	2	In domain	+	0.9946	+	0.9659	+	1.0000	-	0.5714	Mitochondria	0.6228	-	1.0000	+	0.9489	+	0.9562	-	0.9600	+	0.7000	+	0.6411	-	0.8297	-	0.6792	+	0.6438	+	0.7753	+	0.8760	-
lianzixin_004	Lotusine	COc1cc2[C@@H](Cc3ccc(O)cc3)[N+](C)(C)CCc2cc1O	Lianzixin	314.399	Book: Chemical Components of Source Plants in Traditional Chinese Medicine (ISBN: 9787030235534)	42	U.S. Patent Application No. 15/573,583.	0.00586	0.3143	103.51	10.3969/j.issn.1008-0805.2005.12.007	3.02	3	2	3	In domain	-	0.9675	+	0.8564	+	0.9848	-	0.6857	Mitochondria	0.6564	-	0.8418	+	0.9339	+	0.9447	-	0.6800	+	0.6000	-	0.5000	-	0.6704	-	0.6544	+	0.5976	-	0.8000	+	0.5000	-
gancao_028	Glycyrrhetinic acid	CC1(C)[C@@H](O)CC[C@@]2(C)[C@H]1CC[C@]3(C)[C@@H]2C(=O)C=C4[C@@H]5C[C@](C)(CC[C@]5(C)CC[C@@]34C)C(=O)O	Gancao	470.684	Book: Chemical Components of Source Plants in Traditional Chinese Medicine (ISBN: 9787030235534)	167	U.S. Patent Application No. 15/573,583.	0.000951	0.5857	83.1407	10.3969/j.issn.1673-4890.2012.09.005	6.41	3	2	1	In domain	+	0.9901	-	0.5154	-	0.8514	+	0.5857	Mitochondria	0.8912	-	0.8587	-	0.7738	-	0.5698	-	0.9600	-	0.5321	+	0.9142	-	0.6281	-	0.9362	+	0.6689	-	0.7735	-	0.9031	-
lianzixin_008	Neferine	COc1ccc(C[C@H]2N(C)CCc3cc(OC)c(Oc4cc(C[C@H]5N(C)CCc6cc(OC)c(OC)cc56)ccc4O)cc23)cc1	Lianzixin	624.766	Book: Chemical Components of Source Plants in Traditional Chinese Medicine (ISBN: 9787030235534)	42	U.S. Patent Application No. 15/573,583.	0.00704	0.3857	76.7936	10.3969/j.issn.1001-0408.2002.04.023	6.76	8	1	10	In domain	+	0.9864	-	0.6891	+	0.9844	-	0.6143	Mitochondria	0.6826	-	0.5650	+	0.9329	+	0.9426	-	0.8000	+	0.5500	+	0.9927	+	0.9464	-	0.5486	+	0.6699	+	0.7865	+	0.7818	-
qinghao_016	Artemisinic acid	C[C@@H]1CC[C@H]([C@H]2C=C(C)CC[C@@H]12)C(=C)C(=O)O	Qinghao	234.334	Book: Chemical Components of Source Plants in Traditional Chinese Medicine (ISBN: 9787030235534)	250	U.S. Patent Application No. 15/573,583.	0.00034	0.4714	71.9356	10.3321/j.issn:0513-4870.2007.09.013	3.65	1	1	2	In domain	+	0.9893	+	0.8274	+	0.9342	-	0.5286	Plasma membrane	0.5259	-	0.8533	+	0.9394	+	0.8224	-	0.9400	+	0.5750	-	0.9452	-	0.9509	-	0.8627	+	0.5158	+	0.6092	-	0.8904	-
renshen_051	Ginsenoside Rb1	CC(=CCC[C@@](C)(O[C@@H]1O[C@H](CO[C@@H]2O[C@H](CO)[C@@H](O)[C@H](O)[C@H]2O)[C@@H](O)[C@H](O)[C@H]1O)[C@H]3CC[C@]4(C)[C@@H]3[C@H](O)C[C@@H]5[C@@]6(C)CC[C@H](O[C@@H]7O[C@H](CO)[C@@H](O)[C@H](O)[C@H]7O[C@@H]8O[C@H](CO)[C@@H](O)[C@H](O)[C@H]8O)C(C)(C)[C@@H]6CC[C@@]45C)C	Renshen	1109.29	Book: Chemical Components of Source Plants in Traditional Chinese Medicine (ISBN: 9787030235534)	167	U.S. Patent Application No. 15/573,583.	0.00516	0.2143	70.0345	10.3969/j.issn.1001-4721.2013.04.015	-2.20	23	15	16	Warning	-	0.6476	-	0.9372	-	0.2765	-	0.7857	Mitochondria	0.7251	-	1.0000	+	0.8060	+	0.8189	-	0.9612	-	0.6000	+	0.8831	+	0.7522	-	0.7449	+	0.7285	-	0.8025	-	0.8264	-
renshen_056	Ginsenoside Re	C[C@@H]1O[C@@H](O[C@H]2[C@@H](O)[C@H](O)[C@@H](CO)O[C@@H]2O[C@H]3C[C@]4(C)[C@H](C[C@@H](O)[C@@H]5[C@H](CC[C@@]45C)[C@@](C)(CCC=C(C)C)O[C@@H]6O[C@H](CO)[C@@H](O)[C@H](O)[C@H]6O)[C@@]7(C)CC[C@H](O)C(C)(C)[C@H]37)[C@H](O)[C@H](O)[C@H]1O	Renshen	947.154	Book: Chemical Components of Source Plants in Traditional Chinese Medicine (ISBN: 9787030235534)	167	U.S. Patent Application No. 15/573,583.	0.00431	0.1571	50.225	10.3969/j.issn.1001-4721.2013.04.015	-0.03	18	12	12	Warning	-	0.6476	-	0.8885	-	0.2765	-	0.8429	Mitochondria	0.7251	-	1.0000	+	0.8312	+	0.8189	-	0.9612	-	0.6000	-	0.5216	+	0.7718	-	0.5614	+	0.7305	-	0.8025	-	0.8264	-
lianzixin_003	Liensinine	COc1cc2CCN(C)[C@H](Cc3ccc(O)c(Oc4cc5[C@@H](Cc6ccc(O)cc6)N(C)CCc5cc4OC)c3)c2cc1OC	Lianzixin	610.739	Book: Chemical Components of Source Plants in Traditional Chinese Medicine (ISBN: 9787030235534)	42	U.S. Patent Application No. 15/573,583.	0.00454	0.3571	46.904	10.3969/j.issn.1001-0408.2002.04.023	6.46	8	2	9	In domain	+	0.9864	-	0.7055	+	0.9821	-	0.6429	Mitochondria	0.6465	-	0.5656	+	0.9304	+	0.9393	-	0.8000	-	0.5000	+	0.9807	+	0.9338	+	0.5465	+	0.6649	+	0.7865	+	0.7818	-
renshen_054	Ginsenoside Rc	CC(=CCC[C@](C)(O[C@H]1O[C@H](CO[C@@H]2O[C@@H](CO)[C@H](O)[C@H]2O)[C@H](O)[C@H](O)[C@@H]1O)[C@H]3CC[C@]4(C)[C@@H]3[C@H](O)C[C@@H]5[C@@]6(C)CC[C@H](O[C@@H]7O[C@H](CO)[C@@H](O)[C@H](O)[C@H]7O[C@H]8O[C@H](CO)[C@@H](O)[C@H](O)[C@H]8O)C(C)(C)[C@@H]6CC[C@@]45C)C	Renshen	1079.27	Book: Chemical Components of Source Plants in Traditional Chinese Medicine (ISBN: 9787030235534)	167	U.S. Patent Application No. 15/573,583.	0.00305	0.2143	42.5481	10.3969/j.issn.1001-4721.2013.04.015	-1.56	22	14	16	Warning	-	0.6476	-	0.9322	-	0.3269	-	0.7857	Mitochondria	0.7487	-	1.0000	+	0.8060	+	0.8885	-	0.9612	-	0.5500	+	0.8794	+	0.7535	-	0.7449	+	0.7285	-	0.8025	-	0.8264	-
maidong_015	Methyl ophiopogonanone B	COc1ccc(C[C@@H]2COc3c(C)c(O)c(C)c(O)c3C2=O)cc1	Maidong	328.359	Book: Chemical Components of Source Plants in Traditional Chinese Medicine (ISBN: 9787030235534)	250	U.S. Patent Application No. 15/573,583.	0.000229	0.4286	31.4376	10.3321/j.issn:0253-2670.2007.11.014	3.16	5	2	3	In domain	+	0.9956	+	0.7277	-	0.4450	-	0.5714	Mitochondria	0.7447	-	0.8605	+	0.8839	-	0.2552	-	0.8800	-	0.9250	-	0.5925	-	0.6512	-	0.7556	+	0.5723	+	0.5969	-	0.7779	-
renshen_052	Ginsenoside Rb2	CC(=CCC[C@](C)(O[C@H]1O[C@H](CO[C@@H]2OC[C@H](O)[C@H](O)[C@H]2O)[C@H](O)[C@@H](O)[C@@H]1O)[C@H]3CC[C@]4(C)[C@@H]3[C@H](O)C[C@@H]5[C@@]6(C)CC[C@@H](O[C@H]7O[C@@H](CO)[C@H](O)[C@@H](O)[C@@H]7O[C@@H]8O[C@@H](CO)[C@H](O)[C@@H](O)[C@@H]8O)C(C)(C)[C@@H]6CC[C@@]45C)C	Renshen	1079.27	Book: Chemical Components of Source Plants in Traditional Chinese Medicine (ISBN: 9787030235534)	167	U.S. Patent Application No. 15/573,583.	0.00223	0.2143	31.1089	10.3969/j.issn.1001-4721.2013.04.015	-1.56	22	14	15	Warning	-	0.6476	-	0.9290	-	0.2765	-	0.7857	Mitochondria	0.7251	-	1.0000	+	0.8025	+	0.8189	-	0.9612	-	0.6000	+	0.8720	+	0.7537	-	0.6505	+	0.7360	-	0.8025	-	0.8264	-
lianzixin_002	Isoliensinine	COc1ccc(C[C@H]2N(C)CCc3cc(OC)c(Oc4cc(C[C@H]5N(C)CCc6cc(OC)c(O)cc56)ccc4O)cc23)cc1	Lianzixin	610.739	Book: Chemical Components of Source Plants in Traditional Chinese Medicine (ISBN: 9787030235534)	42	U.S. Patent Application No. 15/573,583.	0.00272	0.3857	30.3517	10.3969/j.issn.1008-0805.2005.12.007	6.46	8	2	9	In domain	+	0.9864	-	0.7056	+	0.9821	-	0.6143	Mitochondria	0.6465	-	0.5651	+	0.9290	+	0.9393	-	0.8000	-	0.5000	+	0.9898	+	0.9334	+	0.5060	+	0.6782	+	0.7865	+	0.7818	-
maidong_030	Ophiopogonin D'	C[C@@H]1CC[C@@]2(OC1)O[C@@H]3C[C@H]4[C@@H]5CC=C6C[C@H](CC[C@]6(C)[C@H]5CC[C@]4(C)[C@H]3[C@@H]2C)O[C@@H]7O[C@H](CO)[C@@H](O)[C@H](O[C@@H]8OC[C@@H](O)[C@H](O)[C@H]8O)[C@H]7O[C@@H]9O[C@@H](C)[C@H](O)[C@@H](O)[C@H]9O	Maidong	855.017	Book: Chemical Components of Source Plants in Traditional Chinese Medicine (ISBN: 9787030235534)	250	U.S. Patent Application No. 15/573,583.	0.001088	0.2143	28.6805	10.3969/j.issn.1001-232x.2014.02.016	0.85	16	8	7	Warning	-	0.5941	-	0.8867	-	0.3181	-	0.7857	Mitochondria	0.7376	-	1.0000	+	0.8904	+	0.8994	-	0.9800	-	0.5500	+	0.7457	+	0.7167	+	0.5785	+	0.7512	-	0.8054	-	0.8216	-
gancao_042	Isoliquiritigenin	Oc1ccc(\C=C\C(=O)c2ccc(O)cc2O)cc1	Gancao	256.253	Book: Chemical Components of Source Plants in Traditional Chinese Medicine (ISBN: 9787030235534)	167	U.S. Patent Application No. 15/573,583.	0.000213	0.4714	27.5288	10.3969/j.issn.1673-4890.2012.09.005	2.70	4	3	3	In domain	+	0.9803	+	0.9313	-	0.6924	-	0.5286	Mitochondria	0.7711	-	0.7039	+	0.9414	+	0.9480	-	0.7800	-	0.9838	-	0.6574	-	0.9385	-	0.9513	-	0.6718	-	0.6211	-	0.8534	+
renshen_057	Ginsenoside Rf	CC(=CCC[C@](C)(O)[C@H]1CC[C@]2(C)[C@@H]1[C@H](O)C[C@@H]3[C@@]4(C)CC[C@H](O)C(C)(C)[C@@H]4[C@H](C[C@@]23C)O[C@@H]5O[C@H](CO)[C@@H](O)[C@H](O)[C@H]5O[C@H]6O[C@H](CO)[C@@H](O)[C@H](O)[C@@H]6O)C	Renshen	801.013	Book: Chemical Components of Source Plants in Traditional Chinese Medicine (ISBN: 9787030235534)	167	U.S. Patent Application No. 15/573,583.	0.00133	0.1857	21.6626	10.3969/j.issn.1001-4721.2013.04.015	1.12	14	10	10	Warning	-	0.6253	-	0.8740	-	0.2765	-	0.8143	Mitochondria	0.7251	-	1.0000	+	0.8348	+	0.8189	-	0.9800	-	0.6000	-	0.5847	+	0.8140	-	0.7230	+	0.7292	-	0.7890	-	0.8406	-
maidong_014	Methyl ophiopogonanone A	Cc1c(O)c(C)c2OC[C@H](Cc3ccc4OCOc4c3)C(=O)c2c1O	Maidong	342.343	Book: Chemical Components of Source Plants in Traditional Chinese Medicine (ISBN: 9787030235534)	250	U.S. Patent Application No. 15/573,583.	0.000105	0.4143	13.3645	10.3321/j.issn:0253-2670.2007.11.014	2.88	6	2	2	In domain	+	0.9894	+	0.5803	+	0.7998	-	0.5857	Mitochondria	0.6898	-	0.7220	+	0.8732	+	0.8718	-	0.8600	-	0.9000	-	0.5000	-	0.6561	-	0.7753	+	0.5212	-	0.6023	-	0.8158	+
qinghao_010	Arteannuin B	C[C@@H]1CC[C@H]2C(=C)C(=O)O[C@]23[C@H]1CC[C@@]4(C)O[C@@H]34	Qinghao	248.317	Book: Chemical Components of Source Plants in Traditional Chinese Medicine (ISBN: 9787030235534)	250	U.S. Patent Application No. 15/573,583.	4.9e-05	0.6143	12.7491	10.3321/j.issn:0513-4870.2007.09.013	2.45	3	0	0	In domain	+	0.9792	+	0.8763	+	0.9567	+	0.6143	Mitochondria	0.6018	-	0.8555	+	0.8960	+	0.9669	-	0.9800	+	0.6250	-	0.9003	-	0.8818	-	0.8986	+	0.6548	-	1.0000	-	0.8414	-
banxia_009	Guanosine	NC1=NC(=O)c2ncn([C@@H]3O[C@H](CO)[C@@H](O)[C@H]3O)c2N1	Banxia	283.241	Book: Chemical Components of Source Plants in Traditional Chinese Medicine (ISBN: 9787030235534)	250	U.S. Patent Application No. 15/573,583.	0.000166	0.0857	5.28256	10.3969/j.issn.1006-6144.2005.04.012	-2.69	9	5	2	In domain	+	0.8467	-	0.9693	+	0.9844	-	0.9143	Nucleus	0.3950	-	1.0000	+	0.9342	+	0.9498	-	1.0000	-	1.0000	-	0.9428	-	0.9225	-	0.8620	-	0.5773	-	0.8021	-	0.8779	-
renshen_053	Ginsenoside Rb3	CC(=CCC[C@](C)(O[C@H]1O[C@H](CO[C@@H]2OC[C@@H](O)[C@H](O)[C@H]2O)[C@@H](O)[C@H](O)[C@@H]1O)[C@H]3CC[C@]4(C)[C@@H]3[C@H](O)C[C@@H]5[C@@]6(C)CC[C@H](O[C@@H]7O[C@H](CO)[C@@H](O)[C@H](O)[C@H]7O[C@H]8O[C@H](CO)[C@@H](O)[C@H](O)[C@H]8O)C(C)(C)[C@@H]6CC[C@@]45C)C	Renshen	1079.27	Book: Chemical Components of Source Plants in Traditional Chinese Medicine (ISBN: 9787030235534)	167	U.S. Patent Application No. 15/573,583.	0.00033	0.2143	4.60356	10.3969/j.issn.1001-4721.2013.04.015	-1.56	22	14	15	Warning	-	0.6476	-	0.9290	-	0.2765	-	0.7857	Mitochondria	0.7251	-	1.0000	+	0.8025	+	0.8189	-	0.9612	-	0.6000	+	0.8720	+	0.7537	-	0.6505	+	0.7360	-	0.8025	-	0.8264	-
banxia_007	Ephedrine	CN[C@@H](C)[C@H](O)c1ccccc1	Banxia	165.232	Book: Chemical Components of Source Plants in Traditional Chinese Medicine (ISBN: 9787030235534)	250	U.S. Patent Application No. 15/573,583.	7e-06	0.7714	3.43711	10.3969/j.issn.1006-6144.2005.04.012	1.33	2	2	3	In domain	+	0.9917	+	0.9313	-	0.9930	+	0.7714	Lysosomes	0.5451	-	1.0000	+	0.9566	+	0.9659	-	1.0000	-	0.9750	-	0.9237	-	0.9741	-	0.9308	-	0.7817	-	1.0000	+	0.6099	-
renshen_061	20(R)-Ginsenoside Rh1	CC(=CCC[C@@](C)(O)[C@H]1CC[C@]2(C)[C@@H]1[C@H](O)C[C@@H]3[C@@]4(C)CC[C@H](O)C(C)(C)[C@@H]4[C@H](C[C@@]23C)O[C@@H]5O[C@H](CO)[C@@H](O)[C@H](O)[C@H]5O)C	Renshen	638.872	Book: Chemical Components of Source Plants in Traditional Chinese Medicine (ISBN: 9787030235534)	167	U.S. Patent Application No. 15/573,583.	0.00011	0.2286	2.7653	10.3969/j.issn.1001-4721.2013.04.015	3.30	9	7	7	In domain	-	0.6253	-	0.8385	-	0.2776	-	0.7714	Mitochondria	0.7286	-	0.7214	+	0.8352	+	0.8549	-	0.9800	-	0.6542	-	0.5657	+	0.7239	-	0.7787	+	0.7194	-	0.7890	-	0.8406	-
MOL008192	NEOPENTANE	CC(C)(C)C	Changshan	72.1488	Database: TCMSP (http://tcmspnw.com)	250	U.S. Patent Application No. 15/573,583.	1e-06	0.8286	1.20789	N/A	2.05	0	0	0	Warning	+	0.9487	+	0.6404	+	1.0000	+	0.8286	Lysosomes	0.6515	-	1.0000	+	0.9785	+	0.9592	-	0.9800	-	0.9000	-	0.9384	-	0.9840	-	0.9927	-	0.8194	-	0.7983	-	0.8071	-
MOL005274	Neohexane	CCC(C)(C)C	Renshen	86.1754	Database: TCMSP (http://tcmspnw.com)	250	U.S. Patent Application No. 15/573,583.	1e-06	0.8714	1.06352	N/A	2.44	0	0	0	In domain	+	0.9223	+	0.8556	+	1.0000	+	0.8714	Lysosomes	0.5722	-	0.8689	+	0.9603	+	0.9528	-	0.9800	-	0.8500	-	0.9242	-	0.9845	-	0.9762	-	0.8038	-	1.0000	-	0.7504	-
MOL000050	GLY	NCC(=O)O	Banxia	75.0666	Database: TCMSP (http://tcmspnw.com)	250	U.S. Patent Application No. 15/573,583.	1e-06	0.7286	1.02083	N/A	-0.97	2	2	1	Warning	-	0.5303	-	0.6460	+	0.8617	+	0.7286	Lysosomes	0.6944	-	0.8678	+	0.9800	+	0.9552	-	1.0000	-	0.9250	-	0.9559	-	0.9886	-	0.9941	-	0.8688	-	0.6017	-	0.8018	-
MOL005999	crotonaldehyde	C\C=C\C=O	Changshan	70.0898	Database: TCMSP (http://tcmspnw.com)	250	U.S. Patent Application No. 15/573,583.	1e-06	0.6714	1.00748	N/A	0.76	1	0	1	Warning	+	0.9795	+	0.7868	+	1.0000	+	0.6714	Mitochondria	0.3921	-	0.8823	+	0.9211	+	0.9641	-	0.9600	-	1.0000	-	0.9138	-	0.9878	-	0.9889	-	0.7431	-	0.7979	-	0.8748	-
MOL000172	Furol	O=Cc1occc1	Banxia	96.0841	Database: TCMSP (http://tcmspnw.com)	250	U.S. Patent Application No. 15/573,583.	1e-06	0.7857	0.860035	N/A	1.09	2	0	1	In domain	+	0.9881	+	0.9311	+	0.9893	+	0.7857	Mitochondria	0.5784	-	1.0000	+	0.9264	+	0.9625	-	0.9400	-	1.0000	-	0.9639	-	0.9872	-	0.9943	-	0.7595	-	1.0000	-	0.7860	-
MOL008166	(E)-Pent-2-en-1-ol	CC\C=C\CO	Changshan	86.1323	Database: TCMSP (http://tcmspnw.com)	250	U.S. Patent Application No. 15/573,583.	1e-06	0.6857	0.837296	N/A	0.94	1	1	2	In domain	+	0.9652	+	0.8822	+	0.9970	+	0.6857	Lysosomes	0.5591	-	0.8618	+	0.9168	+	0.9381	-	1.0000	-	0.8250	-	0.9279	-	0.9855	-	0.9848	-	0.7865	-	1.0000	-	0.7528	-
changshan_001	alpha-Dichroine	O[C@]1(CN2C=Nc3ccccc3C2=O)C[C@@H]4NCCC[C@@H]4O1	Changshan	301.34	Book: Chemical Components of Source Plants in Traditional Chinese Medicine (ISBN: 9787030235534)	250	U.S. Patent Application No. 15/573,583.	3e-06	0.7571	0.792735	10.3969/j.issn.1005-9903.2010.05.011	0.63	6	2	2	In domain	+	0.9434	-	0.6300	+	0.9084	+	0.7571	Mitochondria	0.6182	-	1.0000	+	0.9253	+	0.9389	-	0.7800	-	0.9250	-	0.8058	-	0.8450	-	0.6372	+	0.6151	-	0.8123	-	0.7949	-
MOL004739	DAL	C[C@@H](N)C(=O)O	Banxia	89.0932	Database: TCMSP (http://tcmspnw.com)	250	U.S. Patent Application No. 15/573,583.	1e-06	0.6714	0.792588	N/A	-0.58	2	2	1	In domain	+	0.6361	-	0.9372	+	0.8475	+	0.6714	Lysosomes	0.6664	-	0.8603	+	0.9589	+	0.9610	-	0.9600	-	1.0000	-	0.9435	-	0.9906	-	0.9934	-	0.8603	-	0.5963	-	0.8240	-
MOL006954	BVE	CCCCOC=C	Banxia	100.159	Database: TCMSP (http://tcmspnw.com)	250	U.S. Patent Application No. 15/573,583.	1e-06	0.7286	0.765086	N/A	1.95	1	0	4	In domain	+	0.9385	+	0.8448	+	1.0000	+	0.7286	Lysosomes	0.3748	-	0.8589	+	0.9314	+	0.9389	-	0.9000	-	0.9250	-	0.9426	-	0.9877	-	0.9588	-	0.6349	-	1.0000	-	0.7142	-
banxia_001	beta-Aminobutyric acid	CC[C@H](N)C(=O)O	Banxia	103.12	Book: Chemical Components of Source Plants in Traditional Chinese Medicine (ISBN: 9787030235534)	250	U.S. Patent Application No. 15/573,583.	1e-06	0.7286	0.743119	N/A	-0.19	2	2	2	In domain	+	0.6324	-	0.8307	+	0.8797	+	0.7286	Lysosomes	0.7129	-	0.8501	+	0.9472	+	0.9450	-	0.9600	-	0.8750	-	0.9026	-	0.9888	-	0.9829	-	0.8303	-	0.5862	-	0.7981	-
MOL006940	D-2-Aminobutyrate	CC[C@@H](N)C(=O)O	Banxia	103.12	Database: TCMSP (http://tcmspnw.com)	250	U.S. Patent Application No. 15/573,583.	1e-06	0.7286	0.743119	N/A	-0.19	2	2	2	In domain	+	0.6324	-	0.8307	+	0.8797	+	0.7286	Lysosomes	0.7129	-	0.8501	+	0.9472	+	0.9450	-	0.9600	-	0.8750	-	0.9026	-	0.9888	-	0.9829	-	0.8303	-	0.5862	-	0.7981	-
banxia_016	Pentaldehyde oxime	CCC\C=C\NO	Banxia	101.147	Book: Chemical Components of Source Plants in Traditional Chinese Medicine (ISBN: 9787030235534)	250	U.S. Patent Application No. 15/573,583.	1e-06	0.6857	0.713004	N/A	1.28	2	2	3	In domain	+	0.8682	+	0.9170	+	0.9813	+	0.6857	Lysosomes	0.4645	-	0.8657	+	0.8946	+	0.9386	-	0.9600	-	0.9250	-	0.9232	-	0.9854	-	0.9247	-	0.7273	-	0.6090	-	0.7858	-
MOL004934	Isohexane	CCCC(C)C	Gancao	86.1754	Database: TCMSP (http://tcmspnw.com)	167	U.S. Patent Application No. 15/573,583.	1e-06	0.8571	0.698772	N/A	2.44	0	0	2	In domain	+	0.9588	+	0.7315	+	1.0000	+	0.8571	Lysosomes	0.3807	-	0.8589	+	0.9666	+	0.9477	-	0.9000	-	0.8500	-	0.9613	-	0.9852	-	0.9361	-	0.8039	-	0.8153	-	0.7243	-
MOL001744	uracil	O=C1NC=CC(=O)N1	Banxia	112.087	Database: TCMSP (http://tcmspnw.com)	250	U.S. Patent Application No. 15/573,583.	1e-06	0.7429	0.697087	N/A	-0.94	2	2	0	In domain	+	0.9672	-	0.9332	+	0.9955	+	0.7429	Mitochondria	0.6398	-	1.0000	+	0.9723	+	0.9537	-	0.9600	-	1.0000	-	0.9490	-	0.9908	-	0.9756	-	0.7593	-	0.6667	-	0.8787	-
qinghao_120	Salicylic acid	OC(=O)c1ccccc1O	Qinghao	138.121	Book: Chemical Components of Source Plants in Traditional Chinese Medicine (ISBN: 9787030235534)	250	U.S. Patent Application No. 15/573,583.	1e-06	0.9143	0.696211	N/A	1.09	2	2	1	In domain	+	0.9877	+	0.9313	-	0.9930	+	0.9143	Mitochondria	0.8764	-	1.0000	+	0.9713	+	0.9610	+	0.6800	-	1.0000	-	0.9563	-	0.9884	-	0.9958	-	0.8619	-	1.0000	-	0.8985	-
banxia_004	Coniine	CCC[C@@H]1CCCCN1	Banxia	127.227	Book: Chemical Components of Source Plants in Traditional Chinese Medicine (ISBN: 9787030235534)	250	U.S. Patent Application No. 15/573,583.	1e-06	0.8143	0.673155	N/A	1.93	1	1	2	In domain	+	0.9523	+	0.9016	+	1.0000	+	0.8143	Lysosomes	0.8608	-	0.8337	+	0.9619	+	0.9449	-	0.9600	+	0.6000	-	0.9545	-	0.9855	-	0.7945	-	0.6987	-	0.8070	+	0.5435	-
MOL000388	gamma-aminobutyric acid	NCCCC(=O)O	Banxia	103.12	Database: TCMSP (http://tcmspnw.com)	250	U.S. Patent Application No. 15/573,583.	1e-06	0.6571	0.670194	N/A	-0.19	2	2	3	In domain	+	0.8297	+	0.5000	+	0.9531	+	0.6571	Lysosomes	0.5732	-	0.8491	+	0.9606	+	0.9532	-	1.0000	-	0.8000	-	0.9460	-	0.9870	-	0.9786	-	0.8089	+	0.6180	-	0.7526	-
MOL001738	MLI	OC(=O)CC(=O)O	Renshen	104.061	Database: TCMSP (http://tcmspnw.com)	250	U.S. Patent Application No. 15/573,583.	1e-06	0.6571	0.664129	N/A	-0.45	2	2	2	In domain	+	0.7144	-	0.6185	-	0.4502	+	0.6571	Mitochondria	0.7101	-	0.8641	+	0.9739	+	0.9600	-	1.0000	-	1.0000	-	0.9689	-	0.9844	-	0.9937	-	0.8490	+	0.6532	-	0.8621	-
MOL004972	3-Methylpentane	CCC(C)CC	Gancao	86.1753	Database: TCMSP (http://tcmspnw.com)	167	U.S. Patent Application No. 15/573,583.	1e-06	0.8143	0.663879	N/A	2.44	0	0	2	In domain	+	0.9588	+	0.8606	+	1.0000	+	0.8143	Lysosomes	0.5861	-	0.8593	+	0.9437	+	0.9499	-	0.9000	-	0.8250	-	0.9222	-	0.9850	-	0.9771	-	0.8399	-	0.8153	-	0.7243	-
MOL000714	Hyacinthin	O=CCc1ccccc1	Changshan	120.149	Database: TCMSP (http://tcmspnw.com)	250	U.S. Patent Application No. 15/573,583.	1e-06	0.7571	0.662744	N/A	1.43	1	0	2	In domain	+	0.9578	+	0.9669	+	1.0000	+	0.7571	Mitochondria	0.5919	-	1.0000	+	0.9450	+	0.9645	-	0.9600	-	0.9500	-	0.8969	-	0.9907	-	0.9734	-	0.8088	-	1.0000	-	0.6612	-
qinghao_135	Tricyclene	CC1(C)C2C[C@@H]3[C@H](C2)C13C	Qinghao	136.234	Book: Chemical Components of Source Plants in Traditional Chinese Medicine (ISBN: 9787030235534)	250	U.S. Patent Application No. 15/573,583.	1e-06	0.8571	0.661693	N/A	2.69	0	0	0	In domain	+	0.9668	+	0.6381	+	0.9950	+	0.8571	Lysosomes	0.7463	-	0.8572	+	0.9700	+	0.9381	-	0.8400	-	0.8750	-	0.9123	-	0.9735	-	0.9232	-	0.5826	-	0.7939	-	0.7343	-
banxia_012	Methyl 2-chloroacrylate	COC(=O)C(=C)Cl	Banxia	120.534	Book: Chemical Components of Source Plants in Traditional Chinese Medicine (ISBN: 9787030235534)	250	U.S. Patent Application No. 15/573,583.	1e-06	0.7571	0.660623	N/A	0.91	2	0	1	In domain	+	0.9726	+	0.6884	+	0.9937	+	0.7571	Mitochondria	0.6845	-	0.8722	+	0.9574	+	0.9568	-	0.9600	-	0.9750	-	0.9489	-	0.9791	-	0.9819	-	0.6093	-	0.6159	-	0.8498	-
MOL004920	Methylcyclopentane	CC1CCCC1	Gancao	84.1595	Database: TCMSP (http://tcmspnw.com)	167	U.S. Patent Application No. 15/573,583.	1e-06	0.7857	0.655905	N/A	2.20	0	0	0	In domain	+	0.9622	+	0.8312	+	1.0000	+	0.7857	Lysosomes	0.7492	-	0.8558	+	0.9764	+	0.9574	-	0.9200	-	0.8500	-	0.9688	-	0.9874	-	0.9850	-	0.7583	-	0.8078	-	0.7481	-
MOL005294	3-methylheptane	CCCC[C@@H](C)CC	Renshen	114.229	Database: TCMSP (http://tcmspnw.com)	250	U.S. Patent Application No. 15/573,583.	1e-06	0.7	0.644517	N/A	3.22	0	0	4	In domain	+	0.9588	+	0.9658	+	1.0000	+	0.7000	Lysosomes	0.5432	-	0.8347	+	0.9370	+	0.9471	-	0.9000	-	0.8250	-	0.9538	-	0.9874	-	0.8813	-	0.7373	-	0.8153	-	0.7243	-
MOL000067	L-Valin	CC(C)[C@H](N)C(=O)O	Banxia	117.146	Database: TCMSP (http://tcmspnw.com)	250	U.S. Patent Application No. 15/573,583.	1e-06	0.7143	0.641302	N/A	0.05	2	2	2	In domain	+	0.8419	-	0.8916	+	0.8979	+	0.7143	Lysosomes	0.6892	-	1.0000	+	0.9746	+	0.9570	-	0.9600	-	1.0000	-	0.9364	-	0.9857	-	0.9863	-	0.8180	+	0.6395	-	0.8289	-
qinghao_109	alpha-Pinene	CC1=CC[C@H]2C[C@@H]1C2(C)C	Qinghao	136.234	Book: Chemical Components of Source Plants in Traditional Chinese Medicine (ISBN: 9787030235534)	250	U.S. Patent Application No. 15/573,583.	1e-06	0.8286	0.639691	N/A	3.00	0	0	0	In domain	+	0.9677	+	0.6490	+	0.9901	+	0.8286	Lysosomes	0.6933	-	0.8597	+	0.9538	+	0.9024	-	0.8600	-	0.8250	-	0.9140	-	0.9749	-	0.9284	-	0.5864	-	0.8062	-	0.7846	-
MOL000708	WLN: VHR	O=Cc1ccccc1	Banxia	106.122	Database: TCMSP (http://tcmspnw.com)	250	U.S. Patent Application No. 15/573,583.	1e-06	0.6429	0.637161	N/A	1.50	1	0	1	In domain	+	0.9909	+	0.9412	+	1.0000	+	0.6429	Mitochondria	0.5620	-	1.0000	+	0.9280	+	0.9699	-	1.0000	-	0.9750	-	0.9408	-	0.9886	-	0.9948	-	0.8575	-	0.8058	-	0.7276	-
MOL000708	WLN: VHR	O=Cc1ccccc1	Changshan	106.122	Database: TCMSP (http://tcmspnw.com)	250	U.S. Patent Application No. 15/573,583.	1e-06	0.6429	0.637161	N/A	1.50	1	0	1	In domain	+	0.9909	+	0.9412	+	1.0000	+	0.6429	Mitochondria	0.5620	-	1.0000	+	0.9280	+	0.9699	-	1.0000	-	0.9750	-	0.9408	-	0.9886	-	0.9948	-	0.8575	-	0.8058	-	0.7276	-
MOL001099	p-xylene	Cc1ccc(C)cc1	Gancao	106.165	Database: TCMSP (http://tcmspnw.com)	167	U.S. Patent Application No. 15/573,583.	1e-06	0.9571	0.633378	N/A	2.30	0	0	0	In domain	+	0.9801	+	0.9567	+	1.0000	+	0.9571	Lysosomes	0.5921	-	1.0000	+	0.9739	+	0.9691	-	0.9800	-	0.9500	-	0.8688	-	0.9819	-	0.9955	-	0.8524	-	1.0000	-	0.7340	-
MOL000666	hexanal	CCCCCC=O	Changshan	100.159	Database: TCMSP (http://tcmspnw.com)	250	U.S. Patent Application No. 15/573,583.	1e-06	0.6	0.630047	N/A	1.77	1	0	4	In domain	+	0.9086	+	0.9279	+	1.0000	+	0.6000	Mitochondria	0.3488	-	0.8534	+	0.8810	+	0.9272	-	0.9800	-	0.9000	-	0.9526	-	0.9893	-	0.9392	-	0.7186	-	1.0000	-	0.7756	-
MOL002896	Corydaldine	COc1cc2CCNC(=O)c2cc1OC	Huanglian	207.226	Database: TCMSP (http://tcmspnw.com)	334	U.S. Patent Application No. 15/573,583.	1e-06	0.9286	0.629654	N/A	0.99	3	1	2	In domain	+	0.9962	+	0.9167	+	0.9626	+	0.9286	Mitochondria	0.6954	-	1.0000	+	0.9564	+	0.9646	-	0.9400	-	0.7000	-	0.9297	-	0.9537	-	0.7234	-	0.5575	-	0.8108	-	0.7921	-
MOL003969	L-Serin	N[C@@H](CO)C(=O)O	Banxia	105.093	Database: TCMSP (http://tcmspnw.com)	250	U.S. Patent Application No. 15/573,583.	1e-06	0.6286	0.629091	N/A	-1.61	3	3	2	In domain	-	0.3950	-	0.9411	-	0.4522	+	0.6286	Lysosomes	0.6959	-	0.8532	+	0.9778	+	0.8997	-	1.0000	-	0.9500	-	0.9272	-	0.9871	-	0.9942	-	0.8366	-	0.8024	-	0.7943	-
MOL000114	vanillic acid	COc1cc(ccc1O)C(=O)O	Huanglian	168.147	Database: TCMSP (http://tcmspnw.com)	334	U.S. Patent Application No. 15/573,583.	1e-06	0.7429	0.620811	N/A	1.10	3	2	2	In domain	+	0.9908	+	0.5664	+	0.8429	+	0.7429	Mitochondria	0.8990	-	1.0000	+	0.9721	+	0.9707	-	0.8600	-	1.0000	-	0.9681	-	0.9763	-	0.9797	-	0.7472	-	1.0000	-	0.8470	-
MOL000270	CHEBI:7	CC1=CC[C@@H]2[C@H](C1)C2(C)C	Changshan	136.234	Database: TCMSP (http://tcmspnw.com)	250	U.S. Patent Application No. 15/573,583.	1e-06	0.8	0.617611	N/A	3.00	0	0	0	In domain	+	0.9819	+	0.7793	+	0.9911	+	0.8000	Lysosomes	0.7499	-	0.8536	+	0.9416	+	0.9279	-	0.9400	-	0.8000	-	0.9488	-	0.9663	-	0.9250	-	0.5787	-	0.7890	-	0.7441	-
MOL000270	CHEBI:7	CC1=CC[C@@H]2[C@H](C1)C2(C)C	Qinghao	136.234	Database: TCMSP (http://tcmspnw.com)	250	U.S. Patent Application No. 15/573,583.	1e-06	0.8	0.617611	N/A	3.00	0	0	0	In domain	+	0.9819	+	0.7793	+	0.9911	+	0.8000	Lysosomes	0.7499	-	0.8536	+	0.9416	+	0.9279	-	0.9400	-	0.8000	-	0.9488	-	0.9663	-	0.9250	-	0.5787	-	0.7890	-	0.7441	-
qinghao_110	beta--Pinene	CC1(C)[C@H]2CCC(=C)[C@@H]1C2	Qinghao	136.234	Book: Chemical Components of Source Plants in Traditional Chinese Medicine (ISBN: 9787030235534)	250	U.S. Patent Application No. 15/573,583.	1e-06	0.7857	0.606571	N/A	3.00	0	0	0	In domain	+	0.9677	+	0.7184	+	0.9889	+	0.7857	Lysosomes	0.7266	-	0.8485	+	0.9218	+	0.8860	-	0.8600	-	0.7500	-	0.9400	-	0.9757	-	0.9377	-	0.5512	-	0.8062	-	0.7846	-
MOL008186	Isobutyryl chloride	CC(C)C(=O)Cl	Changshan	106.551	Database: TCMSP (http://tcmspnw.com)	250	U.S. Patent Application No. 15/573,583.	1e-06	0.6143	0.606366	N/A	1.41	1	0	1	In domain	+	0.9708	-	0.6864	+	1.0000	+	0.6143	Mitochondria	0.5927	-	0.8687	+	0.9714	+	0.9614	-	1.0000	-	1.0000	-	0.9307	-	0.9871	-	0.9930	-	0.7517	+	0.5818	-	0.8692	-
qinghao_031	Camphor	CC1(C)[C@@H]2CC[C@]1(C)C(=O)C2	Qinghao	152.233	Book: Chemical Components of Source Plants in Traditional Chinese Medicine (ISBN: 9787030235534)	250	U.S. Patent Application No. 15/573,583.	1e-06	0.8714	0.60203	N/A	2.40	1	0	0	In domain	+	0.9779	+	0.8328	+	0.9968	+	0.8714	Mitochondria	0.5569	-	0.8507	+	0.9490	+	0.9648	-	0.9400	-	0.9500	-	0.9068	-	0.9832	-	0.9481	-	0.5505	-	0.7800	-	0.8045	-
MOL004967	3,3-Dimethylpentane	CCC(C)(C)CC	Gancao	100.202	Database: TCMSP (http://tcmspnw.com)	167	U.S. Patent Application No. 15/573,583.	1e-06	0.8571	0.600956	N/A	2.83	0	0	2	In domain	+	0.9223	+	0.9272	+	1.0000	+	0.8571	Lysosomes	0.5935	-	0.8635	+	0.9689	+	0.9493	-	0.9800	-	0.8000	-	0.9026	-	0.9848	-	0.9567	-	0.8180	-	1.0000	-	0.7504	-
qinghao_048	Cumaldehyde	CC(C)c1ccc(C=O)cc1	Qinghao	148.202	Book: Chemical Components of Source Plants in Traditional Chinese Medicine (ISBN: 9787030235534)	250	U.S. Patent Application No. 15/573,583.	1e-06	0.8429	0.598183	N/A	2.62	1	0	2	In domain	+	0.9972	+	0.9181	+	1.0000	+	0.8429	Mitochondria	0.6056	-	1.0000	+	0.9205	+	0.9681	-	0.9800	-	0.9750	-	0.9117	-	0.9786	-	0.9664	-	0.7974	-	0.7698	-	0.7616	-
MOL004918	HEX	CCCCCC	Gancao	86.1754	Database: TCMSP (http://tcmspnw.com)	167	U.S. Patent Application No. 15/573,583.	1e-06	0.7286	0.594009	N/A	2.59	0	0	3	In domain	+	0.8865	+	0.9692	+	1.0000	+	0.7286	Lysosomes	0.5774	-	0.8511	+	0.9445	+	0.9436	-	0.9600	-	0.7750	-	0.9573	-	0.9880	-	0.9577	-	0.8120	-	0.8415	-	0.7215	-
MOL001867	Isovanillin	COc1ccc(C=O)cc1O	Huanglian	152.147	Database: TCMSP (http://tcmspnw.com)	334	U.S. Patent Application No. 15/573,583.	1e-06	0.6429	0.59374	N/A	1.21	3	1	2	In domain	+	0.9933	+	0.8663	+	0.9358	+	0.6429	Mitochondria	0.9328	-	1.0000	+	0.9113	+	0.9863	-	1.0000	-	1.0000	-	0.9477	-	0.9806	-	0.9733	-	0.6774	-	0.6165	-	0.6929	-
MOL004971	3-methylhexane	CCC[C@H](C)CC	Gancao	100.202	Database: TCMSP (http://tcmspnw.com)	167	U.S. Patent Application No. 15/573,583.	1e-06	0.8429	0.591	N/A	2.83	0	0	3	In domain	+	0.9588	+	0.9244	+	1.0000	+	0.8429	Lysosomes	0.4936	-	0.8441	+	0.9496	+	0.9476	-	0.9000	-	0.8000	-	0.9515	-	0.9887	-	0.9403	-	0.7828	-	0.8153	-	0.7243	-
MOL001831	HX	O=C1N=CNc2nc[nH]c12	Banxia	136.111	Database: TCMSP (http://tcmspnw.com)	250	U.S. Patent Application No. 15/573,583.	1e-06	0.7571	0.585018	N/A	-0.35	3	2	0	In domain	+	0.9924	-	0.7635	+	0.9896	+	0.7571	Mitochondria	0.4537	-	1.0000	+	0.9665	+	0.9527	-	0.9600	-	0.9250	-	0.9364	-	0.9828	-	0.9594	-	0.7292	-	0.6144	-	0.8819	-
qinghao_129	gamma-Terpinene	CC(C)C1=CCC(=CC1)C	Qinghao	136.234	Book: Chemical Components of Source Plants in Traditional Chinese Medicine (ISBN: 9787030235534)	250	U.S. Patent Application No. 15/573,583.	1e-06	0.7571	0.584492	N/A	3.31	0	0	1	In domain	+	0.9692	+	0.9392	+	0.9953	+	0.7571	Lysosomes	0.5344	-	0.8613	+	0.9618	+	0.9298	-	0.9400	-	0.7500	-	0.8862	-	0.9850	-	0.9587	-	0.6795	-	0.8110	-	0.7415	-
MOL005448	Leucinum	CC(C)C[C@H](N)C(=O)O	Banxia	131.173	Database: TCMSP (http://tcmspnw.com)	250	U.S. Patent Application No. 15/573,583.	1e-06	0.7286	0.584192	N/A	0.44	2	2	3	In domain	+	0.8605	-	0.9372	+	0.8905	+	0.7286	Lysosomes	0.7172	-	0.8277	+	0.9631	+	0.9448	-	0.9600	-	0.8750	-	0.9238	-	0.9792	-	0.9590	-	0.7943	+	0.6453	-	0.8051	-
MOL008168	3-hexanone,2,4-dimethyl-	CC[C@H](C)C(=O)C(C)C	Changshan	128.212	Database: TCMSP (http://tcmspnw.com)	250	U.S. Patent Application No. 15/573,583.	1e-06	0.7	0.574222	N/A	2.26	1	0	3	In domain	+	0.9822	+	0.6557	+	1.0000	+	0.7000	Mitochondria	0.4890	-	0.8516	+	0.9120	+	0.9507	-	0.9600	-	0.9750	-	0.8983	-	0.9805	-	0.9713	-	0.7904	-	0.6168	-	0.7682	-
MOL000268	(1S,5S)-1-isopropyl-4-methylenebicyclo[3.1.0]hexane	CC(C)[C@@]12CCC(=C)[C@@H]1C2	Changshan	136.234	Database: TCMSP (http://tcmspnw.com)	250	U.S. Patent Application No. 15/573,583.	1e-06	0.7429	0.573529	N/A	3.00	0	0	1	In domain	+	0.9828	+	0.4943	+	0.9924	+	0.7429	Lysosomes	0.8093	-	0.8435	+	0.9422	+	0.9110	-	0.9000	-	0.6500	-	0.9124	-	0.9741	-	0.8934	-	0.5715	-	0.7731	-	0.7252	-
banxia_020	Trigonelline	C[n+]1cccc(c1)C(=O)[O-]	Banxia	137.136	Book: Chemical Components of Source Plants in Traditional Chinese Medicine (ISBN: 9787030235534)	250	U.S. Patent Application No. 15/573,583.	1e-06	0.7429	0.569757	N/A	-1.13	2	0	1	In domain	+	0.9656	+	0.9665	+	0.9842	+	0.7429	Mitochondria	0.8127	-	0.8792	+	0.9453	+	0.9602	-	0.9800	-	0.7500	-	0.9319	-	0.9861	-	0.9700	-	0.7178	-	1.0000	-	0.8962	-
MOL004095	Cinnamic acid, 3,4-dimethoxy- (8CI)	COc1ccc(\C=C/C(=O)O)cc1OC	Huanglian	208.211	Database: TCMSP (http://tcmspnw.com)	334	U.S. Patent Application No. 15/573,583.	1e-06	0.8429	0.568841	N/A	1.80	3	1	4	In domain	+	0.9796	+	0.8672	+	0.9468	+	0.8429	Mitochondria	0.8623	-	1.0000	+	0.9550	+	0.9798	-	0.9800	-	0.9750	-	0.7411	-	0.9827	-	0.9502	-	0.6619	-	0.7953	-	0.8567	-
MOL008175	Ethyl 3-butenoate	CCOC(=O)CC=C	Changshan	114.142	Database: TCMSP (http://tcmspnw.com)	250	U.S. Patent Application No. 15/573,583.	1e-06	0.6143	0.566036	N/A	1.13	2	0	3	In domain	+	0.9703	+	0.7242	+	0.9964	+	0.6143	Mitochondria	0.5026	-	0.8606	+	0.9378	+	0.9422	-	0.9000	-	0.9500	-	0.9065	-	0.9891	-	0.9963	-	0.6314	-	0.7977	-	0.8708	-
MOL000122	1,8-cineole	C[C@@]12CC[C@@H](CC1)C(C)(C)O2	Qinghao	154.249	Database: TCMSP (http://tcmspnw.com)	250	U.S. Patent Application No. 15/573,583.	1e-06	0.8286	0.564979	N/A	2.74	1	0	0	In domain	+	0.9776	+	0.8195	+	0.9886	+	0.8286	Lysosomes	0.4072	-	0.8485	+	0.9585	+	0.9592	-	0.9200	-	0.9250	-	0.9638	-	0.9728	-	0.9791	-	0.5688	-	1.0000	-	0.7452	-
qinghao_042	1,8-Cineole	CC12CCC(CC1)C(C)(C)O2	Qinghao	154.249	Book: Chemical Components of Source Plants in Traditional Chinese Medicine (ISBN: 9787030235534)	250	U.S. Patent Application No. 15/573,583.	1e-06	0.8286	0.564979	N/A	2.74	1	0	0	In domain	+	0.9776	+	0.8195	+	0.9886	+	0.8286	Lysosomes	0.4072	-	0.8485	+	0.9585	+	0.9592	-	0.9200	-	0.9250	-	0.9638	-	0.9728	-	0.9791	-	0.5688	-	1.0000	-	0.7452	-
changshan_004	4-Quinazolone	O=C1N=CNc2ccccc12	Changshan	146.146	Book: Chemical Components of Source Plants in Traditional Chinese Medicine (ISBN: 9787030235534)	250	U.S. Patent Application No. 15/573,583.	9.8e-07	0.8	0.564209	N/A	0.92	2	1	0	In domain	+	0.9918	+	0.8312	+	0.9938	+	0.8000	Mitochondria	0.7095	-	1.0000	+	0.9655	+	0.9590	-	0.9600	-	0.9250	-	0.8982	-	0.9863	-	0.9792	-	0.5955	-	0.6092	-	0.8883	-
MOL003971	Threonin	C[C@@H](O)[C@H](N)C(=O)O	Banxia	119.119	Database: TCMSP (http://tcmspnw.com)	250	U.S. Patent Application No. 15/573,583.	1e-06	0.6286	0.555014	N/A	-1.22	3	3	2	In domain	+	0.6899	-	0.9289	+	0.8025	+	0.6286	Lysosomes	0.5120	-	0.8634	+	0.9760	+	0.9640	-	1.0000	-	1.0000	-	0.9453	-	0.9861	-	0.9890	-	0.8037	+	0.5906	-	0.7795	-
MOL000065	ASI	N[C@@H](CC(=O)O)C(=O)O	Banxia	133.103	Database: TCMSP (http://tcmspnw.com)	250	U.S. Patent Application No. 15/573,583.	1e-06	0.7	0.553123	N/A	-1.13	3	3	3	In domain	-	0.5312	-	0.9637	+	0.8378	+	0.7000	Lysosomes	0.4835	-	0.8578	+	0.9658	+	0.9309	-	1.0000	-	1.0000	-	0.9697	-	0.9874	-	0.9929	-	0.8152	+	0.5892	-	0.7657	-
MOL004847	2,2-DIMETHYLPENTANE	CCCC(C)(C)C	Gancao	100.202	Database: TCMSP (http://tcmspnw.com)	167	U.S. Patent Application No. 15/573,583.	1e-06	0.7857	0.550894	N/A	2.83	0	0	1	In domain	+	0.9223	+	0.8732	+	1.0000	+	0.7857	Lysosomes	0.5174	-	0.8638	+	0.9417	+	0.9449	-	0.9800	-	0.8250	-	0.9499	-	0.9804	-	0.9555	-	0.7828	-	1.0000	-	0.7504	-
MOL004973	3-Ethylpentane	CCC(CC)CC	Gancao	100.202	Database: TCMSP (http://tcmspnw.com)	167	U.S. Patent Application No. 15/573,583.	1e-06	0.7857	0.550894	N/A	2.83	0	0	3	In domain	+	0.9588	+	0.8258	+	1.0000	+	0.7857	Lysosomes	0.6301	-	0.8636	+	0.9451	+	0.9523	-	0.9000	-	0.8250	-	0.9219	-	0.9861	-	0.9813	-	0.8364	-	0.8153	-	0.7243	-
MOL004839	(1S,2S)-1,2-dimethylcyclopentane	C[C@H]1CCC[C@@H]1C	Gancao	98.1861	Database: TCMSP (http://tcmspnw.com)	167	U.S. Patent Application No. 15/573,583.	1e-06	0.7571	0.54174	N/A	2.44	0	0	0	In domain	+	0.9622	+	0.8089	+	1.0000	+	0.7571	Lysosomes	0.7446	-	0.8558	+	0.9706	+	0.9481	-	0.9200	-	0.8000	-	0.9530	-	0.9830	-	0.9889	-	0.7326	-	0.8078	-	0.7481	-
MOL008170	3-methyl-3,4-divinyl-1-cyclohexene	C[C@]1(C=C)C=CCC[C@@H]1C=C	Changshan	148.245	Database: TCMSP (http://tcmspnw.com)	250	U.S. Patent Application No. 15/573,583.	1e-06	0.7571	0.537137	N/A	3.33	0	0	2	In domain	+	0.9731	+	0.7931	+	0.9972	+	0.7571	Lysosomes	0.7072	-	0.8646	+	0.9432	+	0.8987	-	0.9400	-	0.8000	-	0.9308	-	0.9683	-	0.9506	-	0.5436	-	0.7980	-	0.7751	-
MOL001788	adenine	Nc1ncnc2[nH]cnc12	Banxia	135.127	Database: TCMSP (http://tcmspnw.com)	250	U.S. Patent Application No. 15/573,583.	1e-06	0.6857	0.533708	N/A	-0.06	4	2	0	In domain	+	0.9910	-	0.6012	+	0.8258	+	0.6857	Lysosomes	0.7083	-	1.0000	+	0.9712	+	0.9526	-	0.8800	-	0.6250	-	0.9387	-	0.9868	-	0.9140	-	0.7536	-	0.8000	-	0.8629	-
qinghao_032	Carene-4	CC1=C[C@H]2[C@@H](CC1)C2(C)C	Qinghao	136.234	Book: Chemical Components of Source Plants in Traditional Chinese Medicine (ISBN: 9787030235534)	250	U.S. Patent Application No. 15/573,583.	1e-06	0.6857	0.52937	N/A	3.00	0	0	0	In domain	+	0.9819	+	0.7714	+	0.9927	+	0.6857	Lysosomes	0.6821	-	0.8523	+	0.9556	+	0.8911	-	0.9400	-	0.7500	-	0.9404	-	0.9574	-	0.9661	-	0.5316	-	0.7890	-	0.7441	-
MOL000052	Gulutamine	N[C@@H](CCC(=O)O)C(=O)O	Banxia	147.129	Database: TCMSP (http://tcmspnw.com)	250	U.S. Patent Application No. 15/573,583.	1e-06	0.7286	0.520836	N/A	-0.74	3	3	4	In domain	-	0.5312	-	0.9559	+	0.8450	+	0.7286	Mitochondria	0.4836	-	0.8408	+	0.9744	+	0.9521	-	1.0000	-	0.9250	-	0.9798	-	0.9922	-	0.9907	-	0.7951	+	0.5892	-	0.7657	-
qinghao_128	beta-Terpinene	CC(C)C1=CCC(=C)CC1	Qinghao	136.234	Book: Chemical Components of Source Plants in Traditional Chinese Medicine (ISBN: 9787030235534)	250	U.S. Patent Application No. 15/573,583.	1e-06	0.6714	0.51833	N/A	3.31	0	0	1	In domain	+	0.9692	+	0.8629	+	0.9961	+	0.6714	Lysosomes	0.6277	-	0.8586	+	0.9488	+	0.9157	-	0.9400	-	0.6750	-	0.9424	-	0.9790	-	0.9349	-	0.7000	-	0.8110	-	0.7415	-
MOL002943	BuOH	CCCCO	Gancao	74.1216	Database: TCMSP (http://tcmspnw.com)	167	U.S. Patent Application No. 15/573,583.	1e-06	0.5429	0.514591	N/A	0.78	1	1	2	Warning	+	0.9564	+	0.8959	+	1.0000	+	0.5429	Lysosomes	0.6829	-	0.8619	+	0.9143	+	0.9242	-	0.9800	-	0.9000	-	0.9464	-	0.9846	-	0.9555	-	0.7905	-	1.0000	-	0.7296	-
MOL008198	Vinyl methacrylate	CC(=C)C(=O)OC=C	Changshan	112.127	Database: TCMSP (http://tcmspnw.com)	250	U.S. Patent Application No. 15/573,583.	1e-06	0.5429	0.50924	N/A	1.25	2	0	2	In domain	+	0.9863	+	0.5357	+	0.9915	+	0.5429	Mitochondria	0.5698	-	1.0000	+	0.9604	+	0.9564	-	0.8600	-	0.9750	-	0.9273	-	0.9837	-	0.9859	-	0.6302	-	1.0000	-	0.8658	-
banxia_014	1-Octene	CCCCCCC=C	Banxia	112.213	Book: Chemical Components of Source Plants in Traditional Chinese Medicine (ISBN: 9787030235534)	250	U.S. Patent Application No. 15/573,583.	1e-06	0.5429	0.508849	N/A	3.14	0	0	5	In domain	+	0.9206	+	0.9322	+	1.0000	+	0.5429	Lysosomes	0.4578	-	0.8518	+	0.9249	+	0.9239	-	0.9800	-	0.8250	-	0.9402	-	0.9889	-	0.9510	-	0.6997	-	0.8315	-	0.7358	-
renshen_106	Nicotinic acid	OC(=O)c1cccnc1	Renshen	123.109	Book: Chemical Components of Source Plants in Traditional Chinese Medicine (ISBN: 9787030235534)	167	U.S. Patent Application No. 15/573,583.	1e-06	0.8857	0.505455	N/A	0.78	2	1	1	In domain	+	0.9808	+	0.8200	+	0.9704	+	0.8857	Mitochondria	0.8256	-	1.0000	+	0.9788	+	0.9673	-	1.0000	-	1.0000	-	0.9261	-	0.9904	-	0.9908	-	0.8757	-	1.0000	-	0.9155	-
MOL002841	l-alpha-Fenchone	C[C@@]12CC[C@@H](C1)C(C)(C)C2=O	Qinghao	152.233	Database: TCMSP (http://tcmspnw.com)	250	U.S. Patent Application No. 15/573,583.	1e-06	0.7286	0.503373	N/A	2.40	1	0	0	In domain	+	0.9823	+	0.8223	+	0.9966	+	0.7286	Lysosomes	0.4838	-	0.8428	+	0.9479	+	0.9617	-	0.8800	-	0.9500	-	0.9414	-	0.9822	-	0.9620	-	0.5182	-	0.7907	-	0.7661	-
qinghao_069	Fenchone	C[C@@]12CC[C@H](C1)C(C)(C)C2=O	Qinghao	152.233	Book: Chemical Components of Source Plants in Traditional Chinese Medicine (ISBN: 9787030235534)	250	U.S. Patent Application No. 15/573,583.	1e-06	0.7286	0.503373	N/A	2.40	1	0	0	In domain	+	0.9823	+	0.8223	+	0.9966	+	0.7286	Lysosomes	0.4838	-	0.8428	+	0.9479	+	0.9617	-	0.8800	-	0.9500	-	0.9414	-	0.9822	-	0.9620	-	0.5182	-	0.7907	-	0.7661	-
fuling_002	Adenine	Nc1ncnc2nc[nH]c12	Fuling	135.127	Book: Chemical Components of Source Plants in Traditional Chinese Medicine (ISBN: 9787030235534)	250	U.S. Patent Application No. 15/573,583.	1e-06	0.6429	0.500395	N/A	-0.06	4	2	0	In domain	+	0.9910	-	0.6012	+	0.9176	+	0.6429	Lysosomes	0.5193	-	1.0000	+	0.9725	+	0.9541	-	0.8800	-	0.7000	-	0.9387	-	0.9868	-	0.9306	-	0.7178	-	0.8000	-	0.8629	-
MOL000748	HMF	OCc1oc(C=O)cc1	Banxia	126.11	Database: TCMSP (http://tcmspnw.com)	250	U.S. Patent Application No. 15/573,583.	1e-06	0.6	0.500394	N/A	0.58	3	1	2	In domain	+	0.9795	+	0.6983	+	0.9754	+	0.6000	Mitochondria	0.7748	-	1.0000	+	0.8764	+	0.9509	-	0.9400	-	0.9750	-	0.9598	-	0.9839	-	0.9797	-	0.7593	-	1.0000	-	0.7912	-
MOL005125	ANN	COc1ccc(cc1)C(=O)O	Banxia	152.147	Database: TCMSP (http://tcmspnw.com)	250	U.S. Patent Application No. 15/573,583.	1e-06	0.7143	0.493773	N/A	1.39	2	1	2	In domain	+	0.9913	+	0.9460	+	0.9503	+	0.7143	Mitochondria	0.9255	-	1.0000	+	0.9723	+	0.9780	-	0.9800	-	1.0000	-	0.9454	-	0.9833	-	0.9923	-	0.7619	-	1.0000	-	0.8571	-
MOL000055	L-Lysin	NCCCC[C@H](N)C(=O)O	Banxia	146.188	Database: TCMSP (http://tcmspnw.com)	250	U.S. Patent Application No. 15/573,583.	1e-06	0.6857	0.493327	N/A	-0.47	3	3	5	In domain	-	0.5312	-	0.9010	+	0.9015	+	0.6857	Lysosomes	0.5313	-	0.8467	+	0.9743	+	0.9513	-	1.0000	-	0.8750	-	0.9266	-	0.9870	-	0.9647	-	0.7536	+	0.5892	-	0.7657	-
MOL000068	L-Ile	CC[C@H](C)[C@H](N)C(=O)O	Banxia	131.173	Database: TCMSP (http://tcmspnw.com)	250	U.S. Patent Application No. 15/573,583.	1e-06	0.6143	0.492546	N/A	0.44	2	2	3	In domain	+	0.8605	-	0.7801	+	0.9318	+	0.6143	Lysosomes	0.6198	-	0.8407	+	0.9394	+	0.9389	-	0.9600	-	0.9750	-	0.9245	-	0.9837	-	0.9630	-	0.8018	+	0.6453	-	0.8051	-
MOL004944	Cyclobutanol, 1-ethyl-	CCC1(O)CCC1	Gancao	100.159	Database: TCMSP (http://tcmspnw.com)	167	U.S. Patent Application No. 15/573,583.	1e-06	0.7	0.491016	N/A	1.31	1	1	1	In domain	+	0.9482	+	0.9107	+	0.9732	+	0.7000	Mitochondria	0.5083	-	0.8540	+	0.9591	+	0.9476	-	1.0000	-	0.8500	-	0.9514	-	0.9897	-	0.9672	-	0.7192	-	1.0000	-	0.7321	-
MOL000475	anethole	COc1ccc(\C=C\C)cc1	Banxia	148.202	Database: TCMSP (http://tcmspnw.com)	250	U.S. Patent Application No. 15/573,583.	1e-06	0.6857	0.486622	N/A	2.73	1	0	2	In domain	+	0.9944	+	0.9047	+	0.9862	+	0.6857	Mitochondria	0.7035	-	1.0000	+	0.9413	+	0.9817	-	0.9800	-	0.9500	-	0.8103	-	0.9832	-	0.9698	-	0.6926	+	0.6036	-	0.6859	-
qinghao_030	Camphene	CC1(C)[C@@H]2CC[C@@H](C2)C1=C	Qinghao	136.234	Book: Chemical Components of Source Plants in Traditional Chinese Medicine (ISBN: 9787030235534)	250	U.S. Patent Application No. 15/573,583.	1e-06	0.6286	0.485288	N/A	3.00	0	0	0	In domain	+	0.9677	+	0.6141	+	0.9917	+	0.6286	Lysosomes	0.8063	-	0.8460	+	0.9360	+	0.8579	-	0.8600	-	0.7000	-	0.9399	-	0.9769	-	0.8911	-	0.5461	-	0.8062	-	0.7846	-
MOL002166	ISOHEPTANE	CCCCC(C)C	Gancao	100.202	Database: TCMSP (http://tcmspnw.com)	167	U.S. Patent Application No. 15/573,583.	1e-06	0.6857	0.480779	N/A	2.83	0	0	3	In domain	+	0.9588	+	0.8469	+	1.0000	+	0.6857	Nucleus	0.4002	-	0.8535	+	0.9652	+	0.9412	-	0.9000	-	0.8500	-	0.9624	-	0.9854	-	0.8805	-	0.7558	-	0.8153	-	0.7243	-
MOL004871	(3S)-2,3-dimethylpentane	CC[C@H](C)C(C)C	Gancao	100.202	Database: TCMSP (http://tcmspnw.com)	167	U.S. Patent Application No. 15/573,583.	1e-06	0.6857	0.480779	N/A	2.69	0	0	2	In domain	+	0.9588	+	0.6563	+	1.0000	+	0.6857	Lysosomes	0.4994	-	0.8625	+	0.9379	+	0.9502	-	0.9000	-	0.8250	-	0.9387	-	0.9812	-	0.9685	-	0.8218	-	0.8153	-	0.7243	-
huanglian_007	Ferulic acid	COc1cc(\C=C\C(=O)O)ccc1O	Huanglian	194.184	Book: Chemical Components of Source Plants in Traditional Chinese Medicine (ISBN: 9787030235534)	334	U.S. Patent Application No. 15/573,583.	1e-06	0.6571	0.475483	N/A	1.50	3	2	3	In domain	+	0.9774	+	0.5801	+	0.8504	+	0.6571	Mitochondria	0.8333	-	1.0000	+	0.9534	+	0.9790	-	0.9200	-	1.0000	-	0.8059	-	0.9866	-	0.9754	-	0.6630	-	0.6110	-	0.8502	-
qinghao_087	D-Limonene	CC(=C)[C@@H]1CCC(=CC1)C	Qinghao	136.234	Book: Chemical Components of Source Plants in Traditional Chinese Medicine (ISBN: 9787030235534)	250	U.S. Patent Application No. 15/573,583.	1e-06	0.6143	0.474248	N/A	3.31	0	0	1	In domain	+	0.9692	+	0.7994	+	0.9962	+	0.6143	Lysosomes	0.6471	-	0.8508	+	0.9744	+	0.9164	-	0.9400	-	0.6750	-	0.9303	-	0.9834	-	0.9317	-	0.6282	-	0.8110	-	0.7415	-
qinghao_130	alpha-Terpineol	CC1=CC[C@H](CC1)C(C)(C)O	Qinghao	154.249	Book: Chemical Components of Source Plants in Traditional Chinese Medicine (ISBN: 9787030235534)	250	U.S. Patent Application No. 15/573,583.	1e-06	0.6857	0.467543	N/A	2.50	1	1	1	In domain	+	0.9842	+	0.8160	+	0.9923	+	0.6857	Lysosomes	0.4268	-	0.8466	+	0.9677	+	0.8719	-	0.9600	-	0.6750	-	0.9059	-	0.9843	-	0.9405	-	0.6206	-	0.5790	-	0.7630	-
renshen_135	Salicylic acid	OC(=O)c1ccccc1O	Renshen	138.121	Book: Chemical Components of Source Plants in Traditional Chinese Medicine (ISBN: 9787030235534)	167	U.S. Patent Application No. 15/573,583.	1e-06	0.9143	0.465069	N/A	1.09	2	2	1	In domain	+	0.9877	+	0.9313	-	0.9930	+	0.9143	Mitochondria	0.8764	-	1.0000	+	0.9713	+	0.9610	+	0.6800	-	1.0000	-	0.9563	-	0.9884	-	0.9958	-	0.8619	-	1.0000	-	0.8985	-
MOL000114	vanillic acid	COc1cc(ccc1O)C(=O)O	Banxia	168.147	Database: TCMSP (http://tcmspnw.com)	250	U.S. Patent Application No. 15/573,583.	1e-06	0.7429	0.464679	N/A	1.10	3	2	2	In domain	+	0.9908	+	0.5664	+	0.8429	+	0.7429	Mitochondria	0.8990	-	1.0000	+	0.9721	+	0.9707	-	0.8600	-	1.0000	-	0.9681	-	0.9763	-	0.9797	-	0.7472	-	1.0000	-	0.8470	-
banxia_006	3,4-Dihydroxybenzoic acid	OC(=O)c1ccc(O)c(O)c1	Banxia	154.12	Book: Chemical Components of Source Plants in Traditional Chinese Medicine (ISBN: 9787030235534)	250	U.S. Patent Application No. 15/573,583.	1e-06	0.6571	0.448418	N/A	0.80	3	3	1	In domain	+	0.9802	-	0.5935	-	0.5185	+	0.6571	Mitochondria	0.8732	-	1.0000	+	0.9779	+	0.9647	-	0.8200	-	1.0000	-	0.9867	-	0.9824	-	0.9942	-	0.8317	-	0.8120	-	0.8735	-
MOL001867	Isovanillin	COc1ccc(C=O)cc1O	Changshan	152.147	Database: TCMSP (http://tcmspnw.com)	250	U.S. Patent Application No. 15/573,583.	1e-06	0.6429	0.444416	N/A	1.21	3	1	2	In domain	+	0.9933	+	0.8663	+	0.9358	+	0.6429	Mitochondria	0.9328	-	1.0000	+	0.9113	+	0.9863	-	1.0000	-	1.0000	-	0.9477	-	0.9806	-	0.9733	-	0.6774	-	0.6165	-	0.6929	-
MOL003178	GENOP	OC(=O)c1cc(O)ccc1O	Huanglian	154.12	Database: TCMSP (http://tcmspnw.com)	334	U.S. Patent Application No. 15/573,583.	1e-06	0.4857	0.442819	N/A	0.80	3	3	1	In domain	+	0.9877	+	0.6467	-	0.9350	-	0.5143	Mitochondria	0.8503	-	1.0000	+	0.9561	+	0.9507	+	0.6800	-	1.0000	-	0.9612	-	0.9844	-	0.9872	-	0.8471	-	1.0000	-	0.8985	-
MOL000513	3,4,5-trihydroxybenzoic acid	OC(=O)c1cc(O)c(O)c(O)c1	Banxia	170.12	Database: TCMSP (http://tcmspnw.com)	250	U.S. Patent Application No. 15/573,583.	1e-06	0.7143	0.441608	N/A	0.50	4	4	1	In domain	+	0.9802	-	0.7776	-	0.7148	+	0.7143	Mitochondria	0.7287	-	1.0000	+	0.9414	+	0.9648	-	0.8200	-	1.0000	-	0.9857	-	0.9766	-	0.9942	-	0.8373	-	0.8120	-	0.8735	-
MOL004970	3-methylheptane	CCCC[C@H](C)CC	Gancao	114.229	Database: TCMSP (http://tcmspnw.com)	167	U.S. Patent Application No. 15/573,583.	1e-06	0.7	0.430537	N/A	3.22	0	0	4	In domain	+	0.9588	+	0.9658	+	1.0000	+	0.7000	Lysosomes	0.5432	-	0.8347	+	0.9370	+	0.9471	-	0.9000	-	0.8250	-	0.9538	-	0.9874	-	0.8813	-	0.7373	-	0.8153	-	0.7243	-
qinghao_134	Thujene	CC(C)[C@@]12CC=C(C)[C@@H]1C2	Qinghao	136.234	Book: Chemical Components of Source Plants in Traditional Chinese Medicine (ISBN: 9787030235534)	250	U.S. Patent Application No. 15/573,583.	1e-06	0.5571	0.430089	N/A	3.00	0	0	1	In domain	+	0.9828	+	0.5242	+	0.9917	+	0.5571	Lysosomes	0.7836	-	0.8527	+	0.9622	+	0.9341	-	0.9000	-	0.8000	-	0.8882	-	0.9732	-	0.8952	-	0.6504	-	0.7731	-	0.7252	-
MOL000608	()-Terpinen-4-ol	CC(C)[C@]1(O)CCC(=CC1)C	Qinghao	154.249	Database: TCMSP (http://tcmspnw.com)	250	U.S. Patent Application No. 15/573,583.	1e-06	0.6286	0.42861	N/A	2.50	1	1	1	In domain	+	0.9842	+	0.9111	+	0.9612	+	0.6286	Mitochondria	0.4942	-	0.8466	+	0.9543	+	0.9486	-	0.9600	-	0.7500	-	0.9182	-	0.9850	-	0.9332	-	0.6446	-	0.5790	-	0.7630	-
MOL001850	Izoforon	CC1=CC(=O)CC(C)(C)C1	Gancao	138.207	Database: TCMSP (http://tcmspnw.com)	167	U.S. Patent Application No. 15/573,583.	1e-06	0.8429	0.428483	N/A	2.32	1	0	0	In domain	+	0.9920	+	0.9550	+	0.9857	+	0.8429	Mitochondria	0.5982	-	0.8628	+	0.9560	+	0.9506	-	0.9000	-	0.8500	-	0.8513	-	0.9827	-	0.9791	-	0.5908	-	0.8078	-	0.8705	-
kushen_004	Cytisine	O=C1C=CC=C2[C@H]3CNC[C@H](C3)CN12	Kushen	190.242	Book: Chemical Components of Source Plants in Traditional Chinese Medicine (ISBN: 9787030235534)	250	U.S. Patent Application No. 15/573,583.	1e-06	0.7714	0.426466	N/A	0.55	3	1	0	In domain	+	0.9756	+	0.7987	+	0.9712	+	0.7714	Mitochondria	0.6243	-	0.8654	+	0.9661	+	0.9497	-	0.5400	-	0.6750	-	0.9367	-	0.9712	-	0.6696	-	0.5573	-	1.0000	-	0.7588	-
renshen_150	Succinic acid	OC(=O)CCC(=O)O	Renshen	118.088	Book: Chemical Components of Source Plants in Traditional Chinese Medicine (ISBN: 9787030235534)	167	U.S. Patent Application No. 15/573,583.	1e-06	0.7	0.416466	N/A	-0.06	2	2	3	In domain	+	0.7144	-	0.6255	-	0.8529	+	0.7000	Mitochondria	0.8485	-	0.8518	+	0.9584	+	0.9637	-	1.0000	-	0.9750	-	0.9783	-	0.9854	-	0.9969	-	0.8477	+	0.6532	-	0.8621	-
huanglian_013	2,3,4-Trihydroxy-benzenepropanoic acid	OC(=O)CCc1ccc(O)c(O)c1O	Huanglian	198.173	Book: Chemical Components of Source Plants in Traditional Chinese Medicine (ISBN: 9787030235534)	334	U.S. Patent Application No. 15/573,583.	1e-06	0.5857	0.415287	N/A	0.82	4	4	3	In domain	+	0.9516	-	0.7949	-	0.5201	+	0.5857	Mitochondria	0.7225	-	0.8535	+	0.9344	+	0.9539	-	0.9200	-	1.0000	-	0.9468	-	0.9921	-	0.9787	-	0.7162	+	0.8012	-	0.8218	-
MOL000579	hydroquinone	Oc1ccc(O)cc1	Banxia	110.111	Database: TCMSP (http://tcmspnw.com)	250	U.S. Patent Application No. 15/573,583.	1e-06	0.4286	0.409387	N/A	1.10	2	2	0	In domain	+	0.9853	+	0.8924	-	0.6114	-	0.5714	Mitochondria	0.8220	-	1.0000	+	0.9074	+	0.9479	-	0.9600	-	1.0000	-	0.9641	-	0.9883	-	0.9941	-	0.8472	-	1.0000	-	0.6676	-
MOL004589	Methylheptane	CCCCCC(C)C	Gancao	114.229	Database: TCMSP (http://tcmspnw.com)	167	U.S. Patent Application No. 15/573,583.	1e-06	0.6571	0.404152	N/A	3.22	0	0	4	In domain	+	0.9588	+	0.9435	+	1.0000	+	0.6571	Lysosomes	0.3794	-	0.8426	+	0.9648	+	0.9505	-	0.9000	-	0.8000	-	0.9544	-	0.9863	-	0.8650	-	0.7376	-	0.8153	-	0.7243	-
banxia_017	Protocatechuic aldehyde	Oc1ccc(C=O)cc1O	Banxia	138.121	Book: Chemical Components of Source Plants in Traditional Chinese Medicine (ISBN: 9787030235534)	250	U.S. Patent Application No. 15/573,583.	1e-06	0.5286	0.402512	N/A	0.91	3	2	1	In domain	+	0.9876	+	0.8317	-	0.6308	+	0.5286	Mitochondria	0.8893	-	1.0000	+	0.9525	+	0.9697	-	0.9000	-	1.0000	-	0.9818	-	0.9846	-	0.9950	-	0.7896	-	0.6165	-	0.7529	-
qinghao_080	D-Isoborneol	CC1(C)[C@H]2CC[C@]1(C)[C@@H](O)C2	Qinghao	154.249	Book: Chemical Components of Source Plants in Traditional Chinese Medicine (ISBN: 9787030235534)	250	U.S. Patent Application No. 15/573,583.	1e-06	0.5857	0.399358	N/A	2.19	1	1	0	In domain	+	0.9765	+	0.7608	+	0.9589	+	0.5857	Lysosomes	0.5234	-	0.8484	+	0.9480	+	0.9346	-	0.9400	-	0.8500	-	0.9325	-	0.9805	-	0.9410	+	0.5147	-	0.7698	-	0.7363	-
qinghao_081	L-Isoborneol	CC1(C)[C@@H]2CC[C@@]1(C)[C@H](O)C2	Qinghao	154.249	Book: Chemical Components of Source Plants in Traditional Chinese Medicine (ISBN: 9787030235534)	250	U.S. Patent Application No. 15/573,583.	1e-06	0.5857	0.399358	N/A	2.19	1	1	0	In domain	+	0.9765	+	0.7608	+	0.9589	+	0.5857	Lysosomes	0.5234	-	0.8484	+	0.9480	+	0.9346	-	0.9400	-	0.8500	-	0.9325	-	0.9805	-	0.9410	+	0.5147	-	0.7698	-	0.7363	-
kushen_055	N-Methylcytisine	CN1C[C@@H]2C[C@H](C1)C3=CC=CC(=O)N3C2	Kushen	204.268	Book: Chemical Components of Source Plants in Traditional Chinese Medicine (ISBN: 9787030235534)	250	U.S. Patent Application No. 15/573,583.	1e-06	0.7714	0.397182	N/A	0.90	3	0	0	In domain	+	0.9822	+	0.8839	+	0.9941	+	0.7714	Mitochondria	0.7311	-	0.8575	+	0.9641	+	0.9520	+	0.6000	-	0.6500	-	0.8581	-	0.9786	-	0.7079	+	0.5315	-	0.8134	-	0.6893	-
MOL000054	L-Arginine	N[C@@H](CCCNC(=N)N)C(=O)O	Banxia	174.201	Database: TCMSP (http://tcmspnw.com)	250	U.S. Patent Application No. 15/573,583.	1e-06	0.6571	0.396727	N/A	-1.34	3	5	5	In domain	-	0.5067	-	0.8918	+	0.9497	+	0.6571	Mitochondria	0.5324	-	0.8478	+	0.9703	+	0.9493	-	0.8200	-	0.9000	-	0.9458	-	0.9833	-	0.8091	-	0.7078	-	0.5960	-	0.7636	-
MOL000473	(-)-trans-Carveol	CC(=C)[C@@H]1CC=C(C)[C@@H](O)C1	Qinghao	152.233	Database: TCMSP (http://tcmspnw.com)	250	U.S. Patent Application No. 15/573,583.	1e-06	0.5714	0.394767	N/A	2.28	1	1	1	In domain	+	0.9859	+	0.7041	+	0.9406	+	0.5714	Mitochondria	0.4869	-	0.8554	+	0.9691	+	0.9587	-	1.0000	-	0.8250	-	0.9402	-	0.9772	-	0.8702	-	0.6433	-	0.8090	-	0.7021	-
qinghao_033	cis-Carveol	CC(=C)[C@H]1CC=C(C)[C@@H](O)C1	Qinghao	152.233	Book: Chemical Components of Source Plants in Traditional Chinese Medicine (ISBN: 9787030235534)	250	U.S. Patent Application No. 15/573,583.	1e-06	0.5714	0.394767	N/A	2.28	1	1	1	In domain	+	0.9859	+	0.7041	+	0.9406	+	0.5714	Mitochondria	0.4869	-	0.8554	+	0.9691	+	0.9587	-	1.0000	-	0.8250	-	0.9402	-	0.9772	-	0.8702	-	0.6433	-	0.8090	-	0.7021	-
qinghao_034	trans-Carveol	CC(=C)[C@H]1CC=C(C)[C@H](O)C1	Qinghao	152.233	Book: Chemical Components of Source Plants in Traditional Chinese Medicine (ISBN: 9787030235534)	250	U.S. Patent Application No. 15/573,583.	1e-06	0.5714	0.394767	N/A	2.28	1	1	1	In domain	+	0.9859	+	0.7041	+	0.9406	+	0.5714	Mitochondria	0.4869	-	0.8554	+	0.9691	+	0.9587	-	1.0000	-	0.8250	-	0.9402	-	0.9772	-	0.8702	-	0.6433	-	0.8090	-	0.7021	-
qinghao_091	Beta-Maalienc	CC1=C2[C@H]3[C@@H](CC[C@]2(C)CCC1)C3(C)C	Qinghao	204.351	Book: Chemical Components of Source Plants in Traditional Chinese Medicine (ISBN: 9787030235534)	250	U.S. Patent Application No. 15/573,583.	1e-06	0.7571	0.389661	N/A	4.56	0	0	0	In domain	+	0.9819	+	0.8831	+	0.9864	+	0.7571	Lysosomes	0.6504	-	0.8436	+	0.8887	+	0.9353	-	0.9400	-	0.7000	-	0.8770	-	0.8543	-	0.9319	+	0.5641	-	0.7890	-	0.7441	-
MOL007420	gamma-Terpineol	CC(=C1CCC(C)(O)CC1)C	Qinghao	154.249	Database: TCMSP (http://tcmspnw.com)	250	U.S. Patent Application No. 15/573,583.	1e-06	0.5714	0.389608	N/A	2.65	1	1	0	In domain	+	0.9661	+	0.9340	+	0.9612	+	0.5714	Mitochondria	0.4942	-	0.8447	+	0.9489	+	0.9486	-	1.0000	-	0.7500	-	0.8434	-	0.9728	-	0.9738	-	0.6090	-	0.8024	-	0.7708	-
MOL005313	5-[(3aS,6R,6aR)-2-keto-1,3,3a,4,6,6a-hexahydrothieno[3,4-d]imidazol-6-yl]valeric acid	OC(=O)CCCC[C@H]1SC[C@H]2NC(=O)N[C@@H]12	Renshen	244.311	Database: TCMSP (http://tcmspnw.com)	250	U.S. Patent Application No. 15/573,583.	1e-06	0.9	0.387446	N/A	0.80	3	3	5	In domain	+	0.7946	-	0.8744	+	0.9955	+	0.9000	Mitochondria	0.7672	-	0.8520	+	0.9441	+	0.9480	-	0.8600	-	0.8000	-	0.8932	-	0.9428	-	0.8411	-	0.5864	+	0.6124	-	0.8281	-
MOL000268	(1S,5S)-1-isopropyl-4-methylenebicyclo[3.1.0]hexane	CC(C)[C@@]12CCC(=C)[C@@H]1C2	Zhishi	136.234	Database: TCMSP (http://tcmspnw.com)	167	U.S. Patent Application No. 15/573,583.	1e-06	0.7429	0.383118	N/A	3.00	0	0	1	In domain	+	0.9828	+	0.4943	+	0.9924	+	0.7429	Lysosomes	0.8093	-	0.8435	+	0.9422	+	0.9110	-	0.9000	-	0.6500	-	0.9124	-	0.9741	-	0.8934	-	0.5715	-	0.7731	-	0.7252	-
qinghao_123	Scopoletin	COc1cc2C=CC(=O)Oc2cc1O	Qinghao	192.168	Book: Chemical Components of Source Plants in Traditional Chinese Medicine (ISBN: 9787030235534)	250	U.S. Patent Application No. 15/573,583.	1e-06	0.7	0.383114	N/A	1.51	4	1	1	In domain	+	0.9897	+	0.6688	-	0.4287	+	0.7000	Mitochondria	0.6806	-	1.0000	+	0.9413	+	0.9915	-	0.8200	-	0.9500	-	0.8769	-	0.9525	-	0.9229	-	0.6368	-	0.8431	-	0.8139	-
maidong_034	Beta-Patchoulene	C[C@H]1CCC2=C1C[C@H]3CC[C@]2(C)C3(C)C	Maidong	204.351	Book: Chemical Components of Source Plants in Traditional Chinese Medicine (ISBN: 9787030235534)	250	U.S. Patent Application No. 15/573,583.	1e-06	0.7429	0.382353	N/A	4.56	0	0	0	In domain	+	0.9738	+	0.8941	+	0.9873	+	0.7429	Lysosomes	0.7381	-	0.8392	+	0.9276	+	0.9269	-	0.8600	-	0.6500	-	0.8706	-	0.9248	-	0.8950	+	0.5278	-	0.7907	-	0.7523	-
MOL006287	α-muurolene	CC(C)[C@H]1CC=C(C)[C@H]2CCC(=C[C@@H]12)C	Changshan	204.351	Database: TCMSP (http://tcmspnw.com)	250	U.S. Patent Application No. 15/573,583.	1e-06	0.7429	0.382353	N/A	4.58	0	0	1	In domain	+	0.9778	+	0.9154	+	0.9935	+	0.7429	Lysosomes	0.5648	-	0.8529	+	0.9516	+	0.8900	-	0.9600	-	0.7000	-	0.8808	-	0.9393	-	0.8956	-	0.5673	-	0.7977	-	0.6973	-
qinghao_046	alpha-Copaene	CC(C)[C@@H]1CC[C@@]2(C)[C@@H]3CC=C(C)[C@H]2[C@H]13	Qinghao	204.351	Book: Chemical Components of Source Plants in Traditional Chinese Medicine (ISBN: 9787030235534)	250	U.S. Patent Application No. 15/573,583.	1e-06	0.7429	0.382353	N/A	4.27	0	0	1	In domain	+	0.9828	+	0.8110	+	0.9889	+	0.7429	Lysosomes	0.6542	-	0.8509	+	0.9528	+	0.9246	-	0.9000	-	0.6750	-	0.8874	-	0.9329	-	0.8845	+	0.5595	-	0.7731	-	0.7252	-
MOL000696	β-terpineol	CC(=C)[C@@H]1CC[C@@](C)(O)CC1	Qinghao	154.249	Database: TCMSP (http://tcmspnw.com)	250	U.S. Patent Application No. 15/573,583.	1e-06	0.5571	0.379858	N/A	2.50	1	1	1	In domain	+	0.9842	+	0.8105	+	0.9407	+	0.5571	Lysosomes	0.4973	-	0.8368	+	0.9656	+	0.9235	-	0.9600	-	0.7000	-	0.9357	-	0.9847	-	0.9377	-	0.5549	-	0.5790	-	0.7630	-
MOL003837	esculetin	Oc1cc2OC(=O)C=Cc2cc1O	Qinghao	178.142	Database: TCMSP (http://tcmspnw.com)	250	U.S. Patent Application No. 15/573,583.	1e-06	0.6429	0.379568	N/A	1.20	4	2	0	In domain	+	0.9815	+	0.5895	-	0.6626	+	0.6429	Mitochondria	0.6897	-	1.0000	+	0.9234	+	0.9755	-	0.8400	-	0.9750	-	0.9550	-	0.9728	-	0.9740	-	0.7472	-	0.8283	-	0.8434	-
MOL000223	caffeic acid	OC(=O)\C=C\c1ccc(O)c(O)c1	Banxia	180.157	Database: TCMSP (http://tcmspnw.com)	250	U.S. Patent Application No. 15/573,583.	1e-06	0.6429	0.37532	N/A	1.20	3	3	2	In domain	+	0.9645	+	0.5000	-	0.4365	+	0.6429	Mitochondria	0.8027	-	1.0000	+	0.9721	+	0.9753	-	0.7400	-	1.0000	-	0.8835	-	0.9904	-	0.9901	-	0.7630	-	0.6110	-	0.8681	-
banxia_011	Homogentisic acid	OC(=O)Cc1cc(O)ccc1O	Banxia	168.147	Book: Chemical Components of Source Plants in Traditional Chinese Medicine (ISBN: 9787030235534)	250	U.S. Patent Application No. 15/573,583.	1e-06	0.6	0.375296	N/A	0.72	3	3	2	In domain	+	0.9519	+	0.5414	-	0.7137	+	0.6000	Mitochondria	0.9108	-	1.0000	+	0.9395	+	0.9471	-	0.9200	-	1.0000	-	0.9708	-	0.9904	-	0.9847	-	0.7745	+	0.8019	-	0.8141	-
qinghao_026	beta-Cadinene	CC(C)[C@@H]1CC=C(C)[C@@H]2CC=C(C)C[C@@H]12	Qinghao	204.351	Book: Chemical Components of Source Plants in Traditional Chinese Medicine (ISBN: 9787030235534)	250	U.S. Patent Application No. 15/573,583.	1e-06	0.7286	0.374993	N/A	4.58	0	0	1	In domain	+	0.9778	+	0.8891	+	0.9911	+	0.7286	Lysosomes	0.6507	-	0.8521	+	0.9566	+	0.9349	-	0.9600	-	0.8250	-	0.8847	-	0.9625	-	0.8126	-	0.5885	-	0.7977	-	0.6973	-
MOL002198	Heptan	CCCCCCC	Gancao	100.202	Database: TCMSP (http://tcmspnw.com)	167	U.S. Patent Application No. 15/573,583.	1e-06	0.5286	0.370628	N/A	2.98	0	0	4	In domain	+	0.8865	+	0.9822	+	1.0000	+	0.5286	Lysosomes	0.5981	-	0.8353	+	0.9552	+	0.9429	-	0.9600	-	0.8000	-	0.9556	-	0.9887	-	0.9516	-	0.7947	-	0.8415	-	0.7215	-
qinghao_025	beta-Bourbonene	CC(C)[C@@H]1CC[C@@]2(C)[C@@H]3CCC(=C)[C@@H]3[C@@H]12	Qinghao	204.351	Book: Chemical Components of Source Plants in Traditional Chinese Medicine (ISBN: 9787030235534)	250	U.S. Patent Application No. 15/573,583.	1e-06	0.7143	0.367633	N/A	4.27	0	0	1	In domain	+	0.9828	+	0.6968	+	0.9882	+	0.7143	Lysosomes	0.7118	-	0.8540	+	0.9256	+	0.9432	-	0.9000	-	0.6750	-	0.9378	-	0.8711	-	0.8860	+	0.5587	-	0.7731	-	0.7252	-
qinghao_029	epsilon-Cadinene	CC(C)[C@@H]1CCC(=C)[C@@H]2CCC(=C)C[C@@H]12	Qinghao	204.351	Book: Chemical Components of Source Plants in Traditional Chinese Medicine (ISBN: 9787030235534)	250	U.S. Patent Application No. 15/573,583.	1e-06	0.7143	0.367633	N/A	4.58	0	0	1	In domain	+	0.9778	+	0.8421	+	0.9926	+	0.7143	Lysosomes	0.7167	-	0.8487	+	0.9222	+	0.9235	-	0.9600	-	0.7000	-	0.9256	-	0.9203	-	0.8118	-	0.5858	-	0.7977	-	0.6973	-
gancao_081	3-Methyl-6,7,8-trihydropyrrolo[l,2-alpha]pyrimidin-2-one	CC1=CN2CCCC2=NC1=O	Gancao	150.178	Book: Chemical Components of Source Plants in Traditional Chinese Medicine (ISBN: 9787030235534)	167	U.S. Patent Application No. 15/573,583.	1e-06	0.7857	0.367569	N/A	0.50	3	0	0	In domain	+	0.9907	+	0.7217	+	0.9949	+	0.7857	Mitochondria	0.8090	-	0.8534	+	0.9783	+	0.9479	-	0.8200	-	0.5250	-	0.9246	-	0.9715	-	0.9512	-	0.6765	-	0.5856	-	0.8704	-
MOL001729	Crysophanol	Cc1cc(O)c2C(=O)c3c(O)cccc3C(=O)c2c1	Banxia	254.238	Database: TCMSP (http://tcmspnw.com)	250	U.S. Patent Application No. 15/573,583.	1e-06	0.8857	0.366402	N/A	2.18	4	2	0	In domain	+	0.9944	+	0.7809	-	0.5835	+	0.8857	Mitochondria	0.8757	-	0.7177	+	0.9470	+	0.9650	-	0.9200	-	0.9750	-	0.8348	-	0.8941	-	0.9537	-	0.5688	-	1.0000	-	0.8285	-
qinghao_122	Scoparone	COc1cc2OC(=O)C=Cc2cc1OC	Qinghao	206.195	Book: Chemical Components of Source Plants in Traditional Chinese Medicine (ISBN: 9787030235534)	250	U.S. Patent Application No. 15/573,583.	1e-06	0.7143	0.364346	N/A	1.81	4	0	2	In domain	+	0.9916	+	0.8389	-	0.3429	+	0.7143	Mitochondria	0.5670	-	1.0000	+	0.9277	+	0.9894	-	0.9200	-	1.0000	-	0.7932	-	0.9055	-	0.9085	-	0.6887	-	1.0000	-	0.8151	-
qinghao_094	Myrcene	CC(=CCCC(=C)C=C)C	Qinghao	136.234	Book: Chemical Components of Source Plants in Traditional Chinese Medicine (ISBN: 9787030235534)	250	U.S. Patent Application No. 15/573,583.	1e-06	0.4714	0.363927	N/A	3.48	0	0	4	In domain	+	0.9698	+	0.7783	+	0.9967	-	0.5286	Nucleus	0.5972	-	0.8612	+	0.9276	+	0.9322	-	0.9600	-	0.7500	-	0.8898	-	0.9810	-	0.9692	-	0.6665	-	0.8209	-	0.7550	-
MOL003547	Azaron	COc1cc(OC)c(\C=C\C)cc1OC	Changshan	208.254	Database: TCMSP (http://tcmspnw.com)	250	U.S. Patent Application No. 15/573,583.	1e-06	0.7143	0.360744	N/A	2.75	3	0	4	In domain	+	0.9944	+	0.8614	+	0.9711	+	0.7143	Mitochondria	0.7500	-	1.0000	-	0.3508	+	0.9875	-	0.9800	-	0.9750	-	0.5924	-	0.9585	-	0.9132	-	0.6840	+	0.6036	-	0.6859	-
qinghao_028	delta-Cadinene	CC(C)[C@@H]1CCC(=C2CCC(=C[C@@H]12)C)C	Qinghao	204.351	Book: Chemical Components of Source Plants in Traditional Chinese Medicine (ISBN: 9787030235534)	250	U.S. Patent Application No. 15/573,583.	1e-06	0.7	0.360273	N/A	4.73	0	0	1	In domain	+	0.9778	+	0.9654	+	0.9895	+	0.7000	Lysosomes	0.5537	-	0.8450	+	0.9550	+	0.9372	-	0.9600	-	0.7000	-	0.8390	-	0.9104	-	0.8327	-	0.6025	-	0.7977	-	0.6973	-
MOL000935	Hepanal	C[C@@H]1CC[C@@H]2[C@H](C3=C(C)CC[C@H]13)C2(C)C	Renshen	204.351	Database: TCMSP (http://tcmspnw.com)	250	U.S. Patent Application No. 15/573,583.	1e-06	0.7	0.360273	N/A	4.42	0	0	0	In domain	+	0.9819	+	0.8504	+	0.9877	+	0.7000	Lysosomes	0.6807	-	0.8423	+	0.9058	+	0.9657	-	0.9400	-	0.6750	-	0.9367	-	0.8414	-	0.8778	+	0.5659	-	0.7890	-	0.7441	-
MOL005269	(+)-Maalioxide	C[C@]12CCC[C@@H]3[C@@H]1[C@](C)(CCC2)OC3(C)C	Renshen	222.366	Database: TCMSP (http://tcmspnw.com)	250	U.S. Patent Application No. 15/573,583.	1e-06	0.7571	0.358092	N/A	4.16	1	0	0	In domain	+	0.9887	+	0.8612	+	0.9866	+	0.7571	Lysosomes	0.4226	-	0.8486	+	0.9274	+	0.9598	-	0.9400	-	0.9000	-	0.9525	-	0.9204	-	0.9443	+	0.5334	-	0.8017	-	0.7026	-
MOL001757	GUN	NC1=Nc2nc[nH]c2C(=O)N1	Banxia	151.126	Database: TCMSP (http://tcmspnw.com)	250	U.S. Patent Application No. 15/573,583.	1e-06	0.5143	0.357922	N/A	-0.77	4	3	0	In domain	+	0.9847	-	0.9011	+	0.9800	+	0.5143	Mitochondria	0.3901	-	1.0000	+	0.9700	+	0.9501	-	0.9600	-	0.9250	-	0.9146	-	0.9866	-	0.9295	-	0.6817	-	0.7965	-	0.8823	-
MOL007431	qinghaosu i	C[C@@H]1CC[C@@H]2[C@@H]3[C@H]1CC=C(C)[C@@H]3OC2=O	Qinghao	206.281	Database: TCMSP (http://tcmspnw.com)	250	U.S. Patent Application No. 15/573,583.	1e-06	0.7	0.356903	N/A	2.54	2	0	0	In domain	+	0.9757	+	0.8719	+	0.7859	+	0.7000	Plasma membrane	0.5361	-	0.8509	+	0.9427	+	0.9548	-	0.9800	-	0.5750	-	0.9375	-	0.9542	-	0.9175	-	0.5000	-	0.7874	-	0.8423	-
qinghao_007	Arteamisinine I	C[C@@H]1CC[C@@H]2[C@@H]3[C@H]1CC=C(C)[C@H]3OC2=O	Qinghao	206.281	Book: Chemical Components of Source Plants in Traditional Chinese Medicine (ISBN: 9787030235534)	250	U.S. Patent Application No. 15/573,583.	1e-06	0.7	0.356903	N/A	2.54	2	0	0	In domain	+	0.9757	+	0.8719	+	0.7859	+	0.7000	Plasma membrane	0.5361	-	0.8509	+	0.9427	+	0.9548	-	0.9800	-	0.5750	-	0.9375	-	0.9542	-	0.9175	-	0.5000	-	0.7874	-	0.8423	-
MOL000389	FERULIC ACID (CIS)	COc1cc(\C=C/C(=O)O)ccc1O	Banxia	194.184	Database: TCMSP (http://tcmspnw.com)	250	U.S. Patent Application No. 15/573,583.	1e-06	0.6571	0.355901	N/A	1.50	3	2	3	In domain	+	0.9774	+	0.5801	+	0.8504	+	0.6571	Mitochondria	0.8333	-	1.0000	+	0.9534	+	0.9790	-	0.9200	-	1.0000	-	0.8059	-	0.9866	-	0.9754	-	0.6630	-	0.6110	-	0.8502	-
MOL006240	THM	CC1=CN([C@H]2C[C@H](O)[C@@H](CO)O2)C(=O)NC1=O	Banxia	242.229	Database: TCMSP (http://tcmspnw.com)	250	U.S. Patent Application No. 15/573,583.	1e-06	0.8143	0.353566	N/A	-1.51	6	3	2	In domain	-	0.4294	-	0.9390	+	0.9676	+	0.8143	Nucleus	0.6071	-	0.8707	+	0.9526	+	0.9475	-	1.0000	-	1.0000	-	0.9479	-	0.9441	-	0.9565	-	0.5381	-	0.7864	-	0.8747	-
MOL000874	paeonol	COc1ccc(C(=O)C)c(O)c1	Renshen	166.174	Database: TCMSP (http://tcmspnw.com)	250	U.S. Patent Application No. 15/573,583.	1e-06	0.5571	0.352599	N/A	1.60	3	1	2	In domain	+	0.9960	+	0.9240	+	0.9655	+	0.5571	Mitochondria	0.9435	-	1.0000	+	0.9679	+	0.9908	-	0.9200	-	0.9750	-	0.9154	-	0.9702	-	0.9628	-	0.6443	-	0.8016	-	0.8116	-
maidong_013	Jasmololone	CC\C=C\CC1=C(C)[C@H](O)CC1=O	Maidong	180.244	Book: Chemical Components of Source Plants in Traditional Chinese Medicine (ISBN: 9787030235534)	250	U.S. Patent Application No. 15/573,583.	1e-06	0.6	0.350108	N/A	1.99	2	1	3	In domain	+	0.9812	+	0.9010	+	0.8747	+	0.6000	Mitochondria	0.6328	-	0.8585	+	0.9027	+	0.9629	-	0.9200	-	0.7750	-	0.7743	-	0.9835	-	0.9293	-	0.6331	-	0.8037	-	0.8587	-
MOL000269	Elemicin	COc1cc(CC=C)cc(OC)c1OC	Renshen	208.254	Database: TCMSP (http://tcmspnw.com)	250	U.S. Patent Application No. 15/573,583.	1e-06	0.6857	0.3463	N/A	2.44	3	0	5	In domain	+	0.9873	+	0.7479	+	0.9619	+	0.6857	Mitochondria	0.7498	-	1.0000	+	0.8964	+	0.9774	-	0.9400	-	0.9750	-	0.8020	-	0.9639	-	0.9368	-	0.6083	+	0.6000	+	0.4914	-
banxia_015	1,5-Pentadiol	OCCCCCO	Banxia	104.148	Book: Chemical Components of Source Plants in Traditional Chinese Medicine (ISBN: 9787030235534)	250	U.S. Patent Application No. 15/573,583.	1e-06	0.3429	0.346281	N/A	0.14	2	2	4	In domain	+	0.9161	+	0.7390	+	0.8328	-	0.6571	Mitochondria	0.5544	-	0.8532	+	0.9655	+	0.9463	-	1.0000	-	0.9000	-	0.9548	-	0.9852	-	0.9900	-	0.8031	-	1.0000	-	0.6902	-
MOL000771	p-coumaric acid	OC(=O)\C=C\c1ccc(O)cc1	Huanglian	164.158	Database: TCMSP (http://tcmspnw.com)	334	U.S. Patent Application No. 15/573,583.	1e-06	0.4	0.342385	N/A	1.49	2	2	2	In domain	+	0.9711	+	0.8533	-	0.7372	-	0.6000	Mitochondria	0.8227	-	1.0000	+	0.9325	+	0.9445	-	0.8400	-	1.0000	-	0.9108	-	0.9890	-	0.9843	-	0.7537	-	0.6124	-	0.8682	-
qinghao_121	beta-Santonin	C[C@@H]1[C@@H]2CC[C@@]3(C)C=CC(=O)C(=C3[C@H]2OC1=O)C	Qinghao	246.302	Book: Chemical Components of Source Plants in Traditional Chinese Medicine (ISBN: 9787030235534)	250	U.S. Patent Application No. 15/573,583.	1e-06	0.8	0.341612	N/A	2.42	3	0	0	In domain	+	0.9844	+	0.7449	-	0.3095	+	0.8000	Mitochondria	0.6498	-	0.8568	+	0.9413	+	0.9651	-	0.8800	-	0.5500	-	0.8050	-	0.8747	-	0.8370	+	0.5944	-	1.0000	-	0.9062	-
qinghao_003	Annuadiepoxide	CC#CC#CC#C[C@@H]1O[C@H]1[C@@H]2O[C@H]2C=C	Qinghao	198.217	Book: Chemical Components of Source Plants in Traditional Chinese Medicine (ISBN: 9787030235534)	250	U.S. Patent Application No. 15/573,583.	1e-06	0.6429	0.341124	N/A	0.74	2	0	2	In domain	+	0.9501	-	0.5758	+	0.9840	+	0.6429	Mitochondria	0.5306	-	1.0000	+	0.9182	+	0.9624	-	0.9000	-	1.0000	-	0.9405	-	0.9494	-	0.9416	-	0.5302	-	1.0000	-	0.7994	-
qinghao_103	1,10-Oxy-beta-myrcene hydroxide	CC(C)(O)\C=C\CC1=CCOC1	Qinghao	168.233	Book: Chemical Components of Source Plants in Traditional Chinese Medicine (ISBN: 9787030235534)	250	U.S. Patent Application No. 15/573,583.	1e-06	0.5429	0.339406	N/A	1.66	2	1	3	In domain	+	0.9520	+	0.9042	+	0.9814	+	0.5429	Mitochondria	0.5024	-	1.0000	+	0.9264	+	0.9466	-	1.0000	-	0.8250	-	0.8567	-	0.9766	-	0.9469	-	0.6218	-	0.6133	-	0.7666	-
qinghao_027	gamma-Cadinene	CC(C)[C@@H]1CCC(=C)[C@@H]2CCC(=C[C@@H]12)C	Qinghao	204.351	Book: Chemical Components of Source Plants in Traditional Chinese Medicine (ISBN: 9787030235534)	250	U.S. Patent Application No. 15/573,583.	1e-06	0.6571	0.338194	N/A	4.58	0	0	1	In domain	+	0.9778	+	0.9185	+	0.9926	+	0.6571	Lysosomes	0.5920	-	0.8510	+	0.9099	+	0.9000	-	0.9600	-	0.7000	-	0.9137	-	0.9305	-	0.8949	-	0.5538	-	0.7977	-	0.6973	-
qinghao_056	5,6-Dimethoxy-7-hydroxycoumarin	COc1c(O)cc2OC(=O)C=Cc2c1OC	Qinghao	222.194	Book: Chemical Components of Source Plants in Traditional Chinese Medicine (ISBN: 9787030235534)	250	U.S. Patent Application No. 15/573,583.	1e-06	0.7143	0.338111	N/A	1.52	5	1	2	In domain	+	0.9897	+	0.7104	-	0.4155	+	0.7143	Mitochondria	0.6686	-	1.0000	+	0.9483	+	0.9746	-	0.8200	-	1.0000	-	0.8591	-	0.9158	-	0.9398	-	0.6069	-	0.8431	-	0.8139	-
MOL004830	Octadiene	CCCC\C=C\C=C	Gancao	110.197	Database: TCMSP (http://tcmspnw.com)	167	U.S. Patent Application No. 15/573,583.	1e-06	0.5286	0.337012	N/A	2.92	0	0	4	In domain	+	0.9597	+	0.9419	+	1.0000	+	0.5286	Lysosomes	0.4330	-	0.8656	+	0.8711	+	0.9356	-	0.9600	-	0.8500	-	0.9258	-	0.9899	-	0.9403	-	0.6669	-	0.8164	-	0.7603	-
MOL000622	Magnograndiolide	C[C@@]1(O)CC[C@@H]2[C@H](OC(=O)C2=C)[C@@H]3[C@H]1CC[C@@]3(C)O	Huanglian	266.333	Database: TCMSP (http://tcmspnw.com)	334	U.S. Patent Application No. 15/573,583.	1e-06	0.6286	0.33164	N/A	1.41	4	2	0	In domain	+	0.9865	+	0.6308	+	0.8763	+	0.6286	Mitochondria	0.5919	-	0.8518	+	0.8748	+	0.9122	-	0.9600	-	0.6571	-	0.9786	-	0.9133	-	0.9170	+	0.6197	-	0.7929	-	0.8539	-
renshen_130	Pyruvic acid	CC(=O)C(=O)O	Renshen	88.0621	Book: Chemical Components of Source Plants in Traditional Chinese Medicine (ISBN: 9787030235534)	167	U.S. Patent Application No. 15/573,583.	1e-06	0.4143	0.330532	N/A	-0.34	2	1	1	In domain	+	0.9597	-	0.7002	+	0.9895	-	0.5857	Mitochondria	0.8783	-	0.8673	+	0.9703	+	0.9664	-	0.9400	-	1.0000	-	0.9505	-	0.9857	-	0.9962	-	0.8148	-	0.6265	-	0.8972	-
MOL000141	hydroxytyrosol	OCCc1ccc(O)c(O)c1	Huanglian	154.163	Database: TCMSP (http://tcmspnw.com)	334	U.S. Patent Application No. 15/573,583.	1e-06	0.3571	0.325482	N/A	0.63	3	3	2	In domain	+	0.9751	+	0.6302	-	0.5648	-	0.6429	Mitochondria	0.8750	-	0.8639	+	0.9392	+	0.9600	-	0.9000	-	0.9250	-	0.9669	-	0.9877	-	0.9668	-	0.7497	-	0.8120	+	0.3502	-
MOL000475	anethole	COc1ccc(\C=C\C)cc1	Gancao	148.202	Database: TCMSP (http://tcmspnw.com)	167	U.S. Patent Application No. 15/573,583.	1e-06	0.6857	0.325064	N/A	2.73	1	0	2	In domain	+	0.9944	+	0.9047	+	0.9862	+	0.6857	Mitochondria	0.7035	-	1.0000	+	0.9413	+	0.9817	-	0.9800	-	0.9500	-	0.8103	-	0.9832	-	0.9698	-	0.6926	+	0.6036	-	0.6859	-
MOL000066	alloaromadedrene	C[C@H]1CC[C@@H]2[C@H]1[C@H]3[C@@H](CCC2=C)C3(C)C	Renshen	204.351	Database: TCMSP (http://tcmspnw.com)	250	U.S. Patent Application No. 15/573,583.	1e-06	0.6286	0.323525	N/A	4.27	0	0	0	In domain	+	0.9819	+	0.7657	+	0.9905	+	0.6286	Lysosomes	0.7069	-	0.8476	+	0.8678	+	0.9419	-	0.9400	-	0.6500	-	0.9662	-	0.9021	-	0.9018	+	0.5519	-	0.7890	-	0.7441	-
renshen_094	Malic acid	O[C@H](CC(=O)O)C(=O)O	Renshen	134.087	Book: Chemical Components of Source Plants in Traditional Chinese Medicine (ISBN: 9787030235534)	167	U.S. Patent Application No. 15/573,583.	1e-06	0.6143	0.321869	N/A	-1.09	3	3	3	In domain	+	0.7732	-	0.9584	-	0.4440	+	0.6143	Mitochondria	0.6921	-	0.8555	+	0.9522	+	0.9499	-	1.0000	-	1.0000	-	0.9789	-	0.9837	-	0.9914	-	0.7875	+	0.5992	-	0.8355	-
MOL006844	Norharman	c1ccc2c(c1)[nH]c3cnccc23	Banxia	168.195	Database: TCMSP (http://tcmspnw.com)	250	U.S. Patent Application No. 15/573,583.	1e-06	0.5143	0.321599	N/A	2.72	1	1	0	In domain	+	0.9943	+	0.5989	+	1.0000	+	0.5143	Mitochondria	0.6100	-	1.0000	+	0.9414	+	0.9596	-	0.8800	-	0.7500	-	0.6654	-	0.9768	-	0.9412	-	0.6883	-	1.0000	-	0.7180	+
MOL002851	ZINC05224268	CC1(C)C[C@@H]2[C@@H]1CC[C@]3(C)O[C@H]3CCC2=C	Changshan	220.35	Database: TCMSP (http://tcmspnw.com)	250	U.S. Patent Application No. 15/573,583.	1e-06	0.6714	0.320463	N/A	3.94	1	0	0	In domain	+	0.9841	+	0.8010	+	0.9785	+	0.6714	Lysosomes	0.5157	-	0.8452	+	0.9102	+	0.9479	-	0.9600	-	0.6500	-	0.8264	-	0.8804	-	0.9159	+	0.5880	-	0.6219	-	0.7466	-
qinghao_079	Isoannulide	C[C@@H]1CC[C@@H]2[C@@H]3[C@H]1CC=C(C)[C@H]3OC(=O)C2=C	Qinghao	232.318	Book: Chemical Components of Source Plants in Traditional Chinese Medicine (ISBN: 9787030235534)	250	U.S. Patent Application No. 15/573,583.	1e-06	0.7	0.316903	N/A	3.10	2	0	0	In domain	+	0.9915	+	0.8608	-	0.3292	+	0.7000	Mitochondria	0.3873	-	0.8563	+	0.9282	+	0.9494	-	0.9800	-	0.7500	-	0.9215	-	0.9083	-	0.9129	+	0.5120	-	0.8119	-	0.8397	+
qinghao_058	gamma-Elemene	CC(=C1CC[C@@](C)(C=C)[C@@H](C1)C(=C)C)C	Qinghao	204.351	Book: Chemical Components of Source Plants in Traditional Chinese Medicine (ISBN: 9787030235534)	250	U.S. Patent Application No. 15/573,583.	1e-06	0.6143	0.316165	N/A	4.89	0	0	2	In domain	+	0.9772	+	0.6742	+	0.9941	+	0.6143	Lysosomes	0.6654	-	0.8509	+	0.9064	-	0.3499	-	0.8800	-	0.7000	-	0.8678	-	0.9379	-	0.8954	-	0.5000	-	0.7977	-	0.7640	-
MOL006574	2-Hydroxychalcone	Oc1ccccc1\C=C\C(=O)c2ccccc2	Kushen	224.255	Database: TCMSP (http://tcmspnw.com)	250	U.S. Patent Application No. 15/573,583.	1e-06	0.6714	0.314884	N/A	3.29	2	1	3	In domain	+	0.9824	+	0.7366	-	0.3907	+	0.6714	Mitochondria	0.8509	-	1.0000	+	0.9516	+	0.9464	-	0.8800	-	0.9500	-	0.6057	-	0.9452	-	0.9728	-	0.7172	-	0.6000	-	0.8075	-
qinghao_131	Terpinyl acetate	CC(=O)OC(C)(C)[C@H]1CCC(=CC1)C	Qinghao	196.286	Book: Chemical Components of Source Plants in Traditional Chinese Medicine (ISBN: 9787030235534)	250	U.S. Patent Application No. 15/573,583.	1e-06	0.5857	0.313832	N/A	3.07	2	0	2	In domain	+	0.9888	+	0.8574	+	0.9886	+	0.5857	Mitochondria	0.6558	-	0.8502	+	0.9695	+	0.8560	-	0.9000	-	0.6000	-	0.9398	-	0.9547	-	0.9352	-	0.5178	+	0.5955	-	0.8761	-
MOL004982	2,6,10-trimethyl-dodecane	CC1=C(O)C(=O)[C@H](O)CO1	Gancao	144.125	Database: TCMSP (http://tcmspnw.com)	167	U.S. Patent Application No. 15/573,583.	1e-06	0.6429	0.313394	N/A	-0.26	4	2	0	In domain	+	0.9640	-	0.7709	+	0.8703	+	0.6429	Mitochondria	0.7104	-	0.8487	+	0.9581	+	0.9721	-	0.8600	-	0.9750	-	0.9449	-	0.9817	-	0.9681	-	0.6278	-	0.7948	-	0.8676	-
MOL000198	(R)-linalool	CC(=CCC[C@@](C)(O)C=C)C	Qinghao	154.249	Database: TCMSP (http://tcmspnw.com)	250	U.S. Patent Application No. 15/573,583.	1e-06	0.4571	0.311673	N/A	2.67	1	1	4	In domain	+	0.9645	+	0.7722	+	0.9920	-	0.5429	Lysosomes	0.3689	-	0.8555	+	0.9374	+	0.9479	-	1.0000	-	0.9000	-	0.8116	-	0.9815	-	0.9728	-	0.6176	-	0.7899	-	0.7511	-
qinghao_088	Linalool	CC(=CCC[C@](C)(O)C=C)C	Qinghao	154.249	Book: Chemical Components of Source Plants in Traditional Chinese Medicine (ISBN: 9787030235534)	250	U.S. Patent Application No. 15/573,583.	1e-06	0.4571	0.311673	N/A	2.67	1	1	4	In domain	+	0.9645	+	0.7722	+	0.9920	-	0.5429	Lysosomes	0.3689	-	0.8555	+	0.9374	+	0.9479	-	1.0000	-	0.9000	-	0.8116	-	0.9815	-	0.9728	-	0.6176	-	0.7899	-	0.7511	-
MOL006949	6-Deoxy-gulose	C[C@@H](O)[C@H](O)[C@@H](O)[C@@H](O)C=O	Banxia	164.156	Database: TCMSP (http://tcmspnw.com)	250	U.S. Patent Application No. 15/573,583.	1e-06	0.4857	0.311187	N/A	-2.35	5	4	4	In domain	+	0.8384	-	0.9214	+	0.8968	-	0.5143	Mitochondria	0.6942	-	0.8616	+	0.9485	+	0.9753	-	0.9800	-	1.0000	-	0.9767	-	0.9773	-	0.9796	-	0.7253	-	1.0000	-	0.7979	-
qinghao_018	Artemisitene	C[C@@H]1CC[C@H]2C(=C)C(=O)O[C@@H]3O[C@@]4(C)CC[C@@H]1[C@@]23OO4	Qinghao	280.316	Book: Chemical Components of Source Plants in Traditional Chinese Medicine (ISBN: 9787030235534)	250	U.S. Patent Application No. 15/573,583.	1e-06	0.8286	0.31089	N/A	2.32	5	0	0	In domain	+	0.9381	+	0.8575	+	0.9195	+	0.8286	Mitochondria	0.5367	-	0.8568	+	0.8980	+	0.9377	-	0.9200	-	0.7500	-	0.9099	-	0.8278	-	0.9135	+	0.6880	-	1.0000	-	0.8378	-
MOL005021	Mipax	COC(=O)c1ccccc1C(=O)OC	Gancao	194.184	Database: TCMSP (http://tcmspnw.com)	167	U.S. Patent Application No. 15/573,583.	1e-06	0.8571	0.310103	N/A	1.26	4	0	2	In domain	+	0.9962	+	0.6681	+	0.9924	+	0.8571	Mitochondria	0.8922	-	1.0000	+	0.9672	+	0.9743	-	0.9800	-	0.9750	-	0.9033	-	0.9541	-	0.9875	-	0.7191	-	1.0000	-	0.8196	-
MOL000697	MRY	OC[C@@H](O)[C@@H](O)CO	Banxia	122.12	Database: TCMSP (http://tcmspnw.com)	250	U.S. Patent Application No. 15/573,583.	1e-06	0.3571	0.307549	N/A	-2.31	4	4	3	In domain	+	0.8011	-	0.9373	-	0.9701	-	0.6429	Mitochondria	0.6169	-	0.8498	+	0.9762	+	0.9474	-	1.0000	-	0.9750	-	0.9631	-	0.9841	-	0.9922	-	0.8381	-	1.0000	-	0.7541	-
gancao_091	5,6,7,8-Tetrahydro-4-methylquinoline	Cc1ccnc2CCCCc12	Gancao	147.217	Book: Chemical Components of Source Plants in Traditional Chinese Medicine (ISBN: 9787030235534)	167	U.S. Patent Application No. 15/573,583.	1e-06	0.6429	0.306812	N/A	2.27	1	0	0	In domain	+	0.9958	+	0.9343	+	1.0000	+	0.6429	Lysosomes	0.5807	-	0.8583	+	0.9821	+	0.9606	-	0.9400	-	0.5750	-	0.8892	-	0.9900	-	0.9144	-	0.7020	-	1.0000	-	0.7551	-
MOL007411	isoartemisia ketone	CC(=C)CC(=O)C(C)(C)C=C	Qinghao	152.233	Database: TCMSP (http://tcmspnw.com)	250	U.S. Patent Application No. 15/573,583.	1e-06	0.4429	0.305989	N/A	2.73	1	0	4	In domain	+	0.9771	+	0.6359	+	0.9951	-	0.5571	Mitochondria	0.4011	-	0.8642	+	0.9394	+	0.9267	-	1.0000	-	0.9000	-	0.9353	-	0.9667	-	0.9520	-	0.6210	-	1.0000	-	0.7993	-
banxia_003	Choline	C[N+](C)(C)CCO	Banxia	104.171	Book: Chemical Components of Source Plants in Traditional Chinese Medicine (ISBN: 9787030235534)	250	U.S. Patent Application No. 15/573,583.	1e-06	0.3	0.302891	N/A	-0.32	1	1	2	In domain	-	0.9761	+	0.9313	+	0.9932	-	0.7000	Lysosomes	0.8089	-	0.8685	+	0.9631	+	0.9452	-	0.9800	-	0.8750	-	0.9620	-	0.9794	-	0.9761	-	0.7952	-	1.0000	-	0.7309	-
fuling_005	Choline	C[N+](C)(C)CCO	Fuling	104.171	Book: Chemical Components of Source Plants in Traditional Chinese Medicine (ISBN: 9787030235534)	250	U.S. Patent Application No. 15/573,583.	1e-06	0.3	0.302891	N/A	-0.32	1	1	2	In domain	-	0.9761	+	0.9313	+	0.9932	-	0.7000	Lysosomes	0.8089	-	0.8685	+	0.9631	+	0.9452	-	0.9800	-	0.8750	-	0.9620	-	0.9794	-	0.9761	-	0.7952	-	1.0000	-	0.7309	-
qinghao_050	Dihydro-deoxyarteannuin B	C[C@@H]1CC[C@H]2[C@@H](C)C(=O)O[C@@]23C=C(C)CC[C@@H]13	Qinghao	234.334	Book: Chemical Components of Source Plants in Traditional Chinese Medicine (ISBN: 9787030235534)	250	U.S. Patent Application No. 15/573,583.	1e-06	0.6714	0.30134	N/A	3.32	2	0	0	In domain	+	0.9715	+	0.9471	-	0.2387	+	0.6714	Mitochondria	0.4562	-	0.8526	+	0.9423	+	0.9485	-	1.0000	-	0.5500	-	0.9077	-	0.8948	-	0.8464	+	0.5839	-	0.8012	-	0.8355	-
qinghao_051	Dihydro-epi-deoxyarteannuin B	C[C@@H]1CC[C@H]2[C@@H](C)C(=O)O[C@]23C=C(C)CC[C@@H]13	Qinghao	234.334	Book: Chemical Components of Source Plants in Traditional Chinese Medicine (ISBN: 9787030235534)	250	U.S. Patent Application No. 15/573,583.	1e-06	0.6714	0.30134	N/A	3.32	2	0	0	In domain	+	0.9715	+	0.9471	-	0.2387	+	0.6714	Mitochondria	0.4562	-	0.8526	+	0.9423	+	0.9485	-	1.0000	-	0.5500	-	0.9077	-	0.8948	-	0.8464	+	0.5839	-	0.8012	-	0.8355	-
qinghao_022	Benzyl acetate	CC(=O)OCc1ccccc1	Qinghao	150.174	Book: Chemical Components of Source Plants in Traditional Chinese Medicine (ISBN: 9787030235534)	250	U.S. Patent Application No. 15/573,583.	1e-06	0.4286	0.30017	N/A	1.75	2	0	2	In domain	+	0.9946	+	0.5964	+	1.0000	-	0.5714	Mitochondria	0.7946	-	1.0000	+	0.9490	+	0.9608	-	0.9200	-	0.8500	-	0.7254	-	0.9913	-	0.9899	-	0.6911	-	0.8060	-	0.8564	-
qinghao_111	Ponticaepoxide	CC#CC#CC#C\C=C\[C@@H]1O[C@@H]1C=C	Qinghao	182.218	Book: Chemical Components of Source Plants in Traditional Chinese Medicine (ISBN: 9787030235534)	250	U.S. Patent Application No. 15/573,583.	1e-06	0.5143	0.296849	N/A	1.53	1	0	2	In domain	+	0.9467	-	0.5764	+	0.9942	+	0.5143	Lysosomes	0.3800	-	1.0000	+	0.9038	+	0.9642	-	0.9600	-	0.9750	-	0.9510	-	0.9566	-	0.8973	-	0.5153	+	0.8110	-	0.8113	-
kushen_001	(+)-Allomatrine	O=C1CCC[C@@H]2[C@H]3CCCN4CCC[C@@H](CN12)[C@H]34	Kushen	248.364	Book: Chemical Components of Source Plants in Traditional Chinese Medicine (ISBN: 9787030235534)	250	U.S. Patent Application No. 15/573,583.	1e-06	0.7	0.296429	N/A	1.87	2	0	0	In domain	+	0.9530	+	0.8266	+	0.9953	+	0.7000	Mitochondria	0.6616	-	0.8557	+	0.9438	+	0.9531	-	0.8000	+	0.8500	-	0.6531	-	0.9402	-	0.7968	-	0.5197	-	0.6276	+	0.4366	-
kushen_013	Isomatrine	O=C1CCC[C@@H]2[C@@H]3CCCN4CCC[C@H](CN12)[C@H]34	Kushen	248.364	Book: Chemical Components of Source Plants in Traditional Chinese Medicine (ISBN: 9787030235534)	250	U.S. Patent Application No. 15/573,583.	1e-06	0.7	0.296429	N/A	1.87	2	0	0	In domain	+	0.9530	+	0.8266	+	0.9953	+	0.7000	Mitochondria	0.6616	-	0.8557	+	0.9438	+	0.9531	-	0.8000	+	0.8500	-	0.6531	-	0.9402	-	0.7968	-	0.5197	-	0.6276	+	0.4366	-
kushen_002	Anagyrine	O=C1C=CC=C2[C@H]3C[C@@H](CN12)[C@H]4CCCCN4C3	Kushen	244.332	Book: Chemical Components of Source Plants in Traditional Chinese Medicine (ISBN: 9787030235534)	250	U.S. Patent Application No. 15/573,583.	1e-06	0.6857	0.295165	N/A	1.82	3	0	0	In domain	+	0.9877	+	0.8666	+	0.9972	+	0.6857	Mitochondria	0.7963	-	0.8569	+	0.9564	+	0.9531	+	0.5800	+	0.8500	-	0.7773	-	0.9499	-	0.6199	+	0.5350	-	1.0000	-	0.6675	-
MOL000968	beta-Bisabolene	CC(=CCCC(=C)[C@@H]1CCC(=CC1)C)C	Renshen	204.351	Database: TCMSP (http://tcmspnw.com)	250	U.S. Patent Application No. 15/573,583.	1e-06	0.5714	0.294086	N/A	5.04	0	0	4	In domain	+	0.9692	+	0.8545	+	0.9960	+	0.5714	Lysosomes	0.3961	-	0.8524	+	0.9324	+	0.8915	-	0.9400	-	0.7750	-	0.8264	-	0.9576	-	0.9102	-	0.5394	-	0.8110	-	0.7415	-
MOL007448	trans-Pinocarveyl acetate	CC(=O)O[C@@H]1C[C@H]2C[C@@H](C1=C)C2(C)C	Qinghao	194.27	Database: TCMSP (http://tcmspnw.com)	250	U.S. Patent Application No. 15/573,583.	1e-06	0.5429	0.293917	N/A	2.54	2	0	1	In domain	+	0.9856	+	0.6570	+	0.9401	+	0.5429	Mitochondria	0.7331	-	0.8545	+	0.9182	+	0.8672	-	0.8400	-	0.7500	-	0.8956	-	0.9408	-	0.9017	+	0.5428	-	0.6031	-	0.8771	-
MOL007134	danshensu	O[C@H](Cc1ccc(O)c(O)c1)C(=O)O	Huanglian	198.173	Database: TCMSP (http://tcmspnw.com)	334	U.S. Patent Application No. 15/573,583.	1e-06	0.4143	0.293757	N/A	0.09	4	4	3	In domain	+	0.9458	-	0.9417	-	0.6081	-	0.5857	Mitochondria	0.8277	-	0.8600	+	0.9495	+	0.9539	-	0.9400	-	1.0000	-	0.9084	-	0.9937	-	0.9794	-	0.7434	+	0.6054	-	0.8034	-
qinghao_008	Arteamisinine III	C[C@@H]1CC[C@H]2[C@@H](C)C(=O)O[C@@H]3O[C@@]4(C)CC[C@@H]1[C@@]23O4	Qinghao	266.333	Book: Chemical Components of Source Plants in Traditional Chinese Medicine (ISBN: 9787030235534)	250	U.S. Patent Application No. 15/573,583.	1e-06	0.7429	0.293371	N/A	2.46	4	0	0	In domain	+	0.8831	+	0.9195	+	0.9323	+	0.7429	Mitochondria	0.6182	-	0.8531	+	0.9244	+	0.9736	-	0.9400	-	0.6750	-	0.8854	-	0.8334	-	0.9265	+	0.7008	-	0.8521	-	0.8409	-
MOL007392	Deoxyarteannuin B	C[C@@H]1CC[C@H]2C(=C)C(=O)O[C@@]23C=C(C)CC[C@@H]13	Qinghao	232.318	Database: TCMSP (http://tcmspnw.com)	250	U.S. Patent Application No. 15/573,583.	1e-06	0.6429	0.291052	N/A	3.24	2	0	0	In domain	+	0.9879	+	0.8975	-	0.2387	+	0.6429	Mitochondria	0.4444	-	0.8547	+	0.9112	+	0.8772	-	0.9800	-	0.5000	-	0.9364	-	0.9145	-	0.8736	+	0.5724	-	1.0000	-	0.8349	+
qinghao_049	6,7-Dehydroartemisinic acid	C[C@@H]1CCC(=C2C=C(C)CC[C@@H]12)C(=C)C(=O)O	Qinghao	232.318	Book: Chemical Components of Source Plants in Traditional Chinese Medicine (ISBN: 9787030235534)	250	U.S. Patent Application No. 15/573,583.	1e-06	0.6429	0.291052	N/A	3.71	1	1	2	In domain	+	0.9893	+	0.8718	+	0.9269	+	0.6429	Plasma membrane	0.5298	-	0.8547	+	0.9202	+	0.8131	-	0.9400	+	0.5250	-	0.9151	-	0.9361	-	0.8411	-	0.5289	+	0.6092	-	0.8904	-
qinghao_059	Epideoxyarteannuin B	C[C@@H]1CC[C@H]2C(=C)C(=O)O[C@]23C=C(C)CC[C@@H]13	Qinghao	232.318	Book: Chemical Components of Source Plants in Traditional Chinese Medicine (ISBN: 9787030235534)	250	U.S. Patent Application No. 15/573,583.	1e-06	0.6429	0.291052	N/A	3.24	2	0	0	In domain	+	0.9879	+	0.8975	-	0.2387	+	0.6429	Mitochondria	0.4444	-	0.8547	+	0.9112	+	0.8772	-	0.9800	-	0.5000	-	0.9364	-	0.9145	-	0.8736	+	0.5724	-	1.0000	-	0.8349	+
qinghao_019	Artemislactone	C[C@@H]1CC[C@@H]2[C@@H]3[C@H]1CC[C@@](C)(O)[C@H]3OC(=O)C2=C	Qinghao	250.333	Book: Chemical Components of Source Plants in Traditional Chinese Medicine (ISBN: 9787030235534)	250	U.S. Patent Application No. 15/573,583.	1e-06	0.6714	0.282081	N/A	2.29	3	1	0	In domain	+	0.9865	+	0.8331	-	0.5000	+	0.6714	Mitochondria	0.6998	-	0.8539	+	0.8834	+	0.9636	-	0.9600	-	0.5849	-	0.9601	-	0.9048	-	0.8773	+	0.5877	-	0.7929	-	0.8539	-
MOL004837	Karenzu DK2	O=C(CC(=O)c1ccccc1)c2ccccc2	Gancao	224.255	Database: TCMSP (http://tcmspnw.com)	167	U.S. Patent Application No. 15/573,583.	1e-06	0.9	0.281961	N/A	3.14	2	0	4	In domain	+	0.9906	+	0.8496	+	0.9911	+	0.9000	Mitochondria	0.7714	-	1.0000	+	0.9695	+	0.9616	-	1.0000	-	1.0000	+	0.5932	-	0.9621	-	0.9811	-	0.8421	-	0.7818	-	0.7129	-
MOL002136	neocnidilide	CCCC[C@@H]1OC(=O)C2=CCCC[C@H]12	Renshen	194.27	Database: TCMSP (http://tcmspnw.com)	250	U.S. Patent Application No. 15/573,583.	1e-06	0.5143	0.278433	N/A	2.83	2	0	3	In domain	+	0.9954	+	0.8945	+	0.9007	+	0.5143	Plasma membrane	0.7498	-	0.8516	+	0.9183	+	0.9696	-	0.9000	-	0.6750	-	0.8756	-	0.9402	-	0.8847	-	0.5552	-	0.6124	-	0.8797	-
kushen_051	Lupanine	O=C1CCC[C@@H]2[C@H]3C[C@H](CN12)[C@@H]4CCCCN4C3	Kushen	248.364	Book: Chemical Components of Source Plants in Traditional Chinese Medicine (ISBN: 9787030235534)	250	U.S. Patent Application No. 15/573,583.	1e-06	0.6571	0.278262	N/A	1.87	2	0	0	In domain	+	0.9530	+	0.7884	+	0.9953	+	0.6571	Mitochondria	0.6616	-	0.8557	+	0.9495	+	0.9531	-	0.8000	+	0.8500	-	0.6620	-	0.9237	-	0.7303	-	0.5282	-	0.6276	+	0.4366	-
qinghao_004	Annulide	C[C@@H]1CC[C@H]2[C@@H]3[C@H]1CCC(=C)[C@H]3OC(=O)C2=C	Qinghao	232.318	Book: Chemical Components of Source Plants in Traditional Chinese Medicine (ISBN: 9787030235534)	250	U.S. Patent Application No. 15/573,583.	1e-06	0.6143	0.278105	N/A	3.10	2	0	0	In domain	+	0.9915	+	0.7922	-	0.3710	+	0.6143	Plasma membrane	0.4674	-	0.8563	+	0.9199	+	0.9465	-	0.9800	-	0.6500	-	0.9534	-	0.9054	-	0.9120	+	0.5136	-	0.8119	-	0.8397	-
MOL004100	N-Salicylidene-salicylamine	Oc1ccccc1C\N=C/c2ccccc2O	Renshen	227.259	Database: TCMSP (http://tcmspnw.com)	250	U.S. Patent Application No. 15/573,583.	1e-06	0.6	0.277678	N/A	2.72	3	2	3	In domain	+	0.9741	+	0.6588	+	0.7904	+	0.6000	Mitochondria	0.9405	-	0.8598	+	0.9213	+	0.8901	-	0.9600	-	0.7500	-	0.6578	-	0.9403	-	0.9520	-	0.6979	-	0.6063	-	0.7738	-
kushen_071	Sophoramine	O=C1C=CC=C2[C@H]3CCCN4CCC[C@@H](CN12)[C@@H]34	Kushen	244.332	Book: Chemical Components of Source Plants in Traditional Chinese Medicine (ISBN: 9787030235534)	250	U.S. Patent Application No. 15/573,583.	1e-06	0.6429	0.276741	N/A	1.82	3	0	0	In domain	+	0.9877	+	0.9032	+	0.9972	+	0.6429	Mitochondria	0.7963	-	0.8574	+	0.9557	+	0.9531	+	0.5800	+	0.8500	-	0.8593	-	0.9571	-	0.7672	-	0.5000	-	1.0000	-	0.6675	-
MOL008177	4,8-dimethoxy-1-methyl-3-(3-methyl-2-oxobut-3-enyl)quinolin-2-one	COC1=C(CC(=O)C(=C)C)C(=O)N(C)c2c(OC)cccc12	Changshan	301.337	Database: TCMSP (http://tcmspnw.com)	250	U.S. Patent Application No. 15/573,583.	1e-06	0.7857	0.27423	N/A	2.24	5	0	5	In domain	+	0.9803	+	0.8721	+	0.9540	+	0.7857	Mitochondria	0.4365	-	1.0000	+	0.9224	+	0.9380	-	0.8000	-	0.8250	-	0.5308	-	0.7622	-	0.7673	+	0.6153	-	0.7958	-	0.8553	+
qinghao_071	5alpha-Hydroperoxy-eudesma-4(15),11-diene	CC(=C)[C@@H]1CC[C@@]2(C)CCCC(=C)[C@@]2(C1)OO	Qinghao	236.35	Book: Chemical Components of Source Plants in Traditional Chinese Medicine (ISBN: 9787030235534)	250	U.S. Patent Application No. 15/573,583.	1e-06	0.6143	0.273361	N/A	4.34	2	1	2	In domain	+	0.9885	+	0.8154	+	0.9095	+	0.6143	Mitochondria	0.5569	-	0.8511	+	0.9151	+	0.9311	-	0.9000	-	0.6000	-	0.8757	-	0.9394	-	0.8426	+	0.5490	-	0.7657	-	0.7195	+
MOL000204	-cis-.beta.-Elemene diastereomer	CC(=C)[C@@H]1CC[C@@](C)(C=C)[C@H](C1)C(=C)C	Qinghao	204.351	Database: TCMSP (http://tcmspnw.com)	250	U.S. Patent Application No. 15/573,583.	1e-06	0.5286	0.272058	N/A	4.75	0	0	3	In domain	+	0.9772	+	0.6561	+	0.9934	+	0.5286	Lysosomes	0.7164	-	0.8492	+	0.9570	-	0.2609	-	0.8800	-	0.6750	-	0.9468	-	0.9511	-	0.8570	+	0.5293	-	0.7977	-	0.7640	-
qinghao_057	beta-Elemene	CC(=C)[C@@H]1CC[C@@](C)(C=C)[C@@H](C1)C(=C)C	Qinghao	204.351	Book: Chemical Components of Source Plants in Traditional Chinese Medicine (ISBN: 9787030235534)	250	U.S. Patent Application No. 15/573,583.	1e-06	0.5286	0.272058	N/A	4.75	0	0	3	In domain	+	0.9772	+	0.6561	+	0.9934	+	0.5286	Lysosomes	0.7164	-	0.8492	+	0.9570	-	0.2609	-	0.8800	-	0.6750	-	0.9468	-	0.9511	-	0.8570	+	0.5293	-	0.7977	-	0.7640	-
renshen_104	beta-Neoclovene	CC1(C)C[C@]23CC[C@H]1[C@@]2(C)CCCC3=C	Renshen	204.351	Book: Chemical Components of Source Plants in Traditional Chinese Medicine (ISBN: 9787030235534)	167	U.S. Patent Application No. 15/573,583.	1e-06	0.7857	0.270126	N/A	4.56	0	0	0	In domain	+	0.9762	+	0.8754	+	0.9900	+	0.7857	Lysosomes	0.7057	-	0.8415	+	0.8746	+	0.8561	-	0.9400	-	0.6500	-	0.8661	-	0.9368	-	0.9488	-	0.5000	-	0.5969	-	0.7431	-
qinghao_015	Artemisia ketone	CC(=CC(=O)C(C)(C)C=C)C	Qinghao	152.233	Book: Chemical Components of Source Plants in Traditional Chinese Medicine (ISBN: 9787030235534)	250	U.S. Patent Application No. 15/573,583.	1e-06	0.3857	0.266471	N/A	2.73	1	0	3	In domain	+	0.9948	+	0.7956	+	0.9962	-	0.6143	Mitochondria	0.4978	-	1.0000	+	0.9399	+	0.9435	-	0.9200	-	0.9250	-	0.9321	-	0.9737	-	0.9676	-	0.6299	-	0.8046	-	0.8901	-
renshen_110	Octanal	CCCCCCCC=O	Renshen	128.212	Book: Chemical Components of Source Plants in Traditional Chinese Medicine (ISBN: 9787030235534)	167	U.S. Patent Application No. 15/573,583.	1e-06	0.4857	0.26615	N/A	2.55	1	0	6	In domain	+	0.9086	+	0.9445	+	1.0000	-	0.5143	Mitochondria	0.3433	-	0.8491	+	0.9024	+	0.9214	-	0.9800	-	0.9500	-	0.9413	-	0.9891	-	0.9337	-	0.7002	-	1.0000	-	0.7756	-
kushen_003	Baptifoline	O[C@H]1CCN2C[C@H]3C[C@H](CN4C(=O)C=CC=C34)[C@H]2C1	Kushen	260.332	Book: Chemical Components of Source Plants in Traditional Chinese Medicine (ISBN: 9787030235534)	250	U.S. Patent Application No. 15/573,583.	1e-06	0.6571	0.26547	N/A	0.79	4	1	0	In domain	+	0.9815	+	0.7393	+	0.9922	+	0.6571	Mitochondria	0.8864	-	0.8587	+	0.9542	+	0.9477	-	0.5600	-	0.5250	-	0.8263	-	0.9425	-	0.5346	+	0.5716	-	1.0000	-	0.6713	-
changshan_002	beta-Dichroine	O[C@@H]1CCCN[C@H]1CC(=O)CN2C=Nc3ccccc3C2=O	Changshan	301.34	Book: Chemical Components of Source Plants in Traditional Chinese Medicine (ISBN: 9787030235534)	250	U.S. Patent Application No. 15/573,583.	1.4e-06	0.5429	0.265278	10.3969/j.issn.1005-9903.2010.05.011	0.47	6	2	4	In domain	+	0.9776	-	0.7707	+	0.8854	+	0.5429	Mitochondria	0.8155	-	1.0000	+	0.9096	+	0.9450	-	0.7800	-	0.8250	-	0.6934	-	0.8109	-	0.5835	+	0.6057	-	1.0000	-	0.7474	-
kushen_005	7,11-Dehydromatrine	O=C1CCCC2=C3CCCN4CCC[C@@H](CN12)[C@@H]34	Kushen	246.348	Book: Chemical Components of Source Plants in Traditional Chinese Medicine (ISBN: 9787030235534)	250	U.S. Patent Application No. 15/573,583.	1e-06	0.6143	0.262266	N/A	2.14	2	0	0	In domain	+	0.9530	+	0.8805	+	0.9655	+	0.6143	Mitochondria	0.5757	-	0.8543	+	0.9369	+	0.9466	-	0.8000	+	0.8500	-	0.5940	-	0.9226	-	0.7120	+	0.5084	-	0.6276	+	0.4366	-
kushen_050	Lehmannine	O=C1CC=C[C@@H]2[C@H]3CCCN4CCC[C@@H](CN12)[C@@H]34	Kushen	246.348	Book: Chemical Components of Source Plants in Traditional Chinese Medicine (ISBN: 9787030235534)	250	U.S. Patent Application No. 15/573,583.	1e-06	0.6143	0.262266	N/A	1.65	2	0	0	In domain	+	0.9385	+	0.8950	+	0.9913	+	0.6143	Mitochondria	0.4990	-	0.8593	+	0.9395	+	0.9513	-	0.9000	+	0.8500	-	0.6920	-	0.9315	-	0.8270	+	0.5110	-	0.8123	+	0.3449	-
renshen_099	Mannose	OC[C@H]1O[C@H](O)[C@@H](O)[C@@H](O)[C@@H]1O	Renshen	180.156	Book: Chemical Components of Source Plants in Traditional Chinese Medicine (ISBN: 9787030235534)	167	U.S. Patent Application No. 15/573,583.	1e-06	0.6714	0.26183	N/A	-3.22	6	5	1	In domain	-	0.9613	-	0.9596	+	0.8516	+	0.6714	Mitochondria	0.6869	-	0.8600	+	0.8770	+	0.9628	-	1.0000	-	0.9750	-	0.9797	-	0.9764	-	0.9943	-	0.7215	-	1.0000	-	0.8313	-
renshen_100	Mannose-b	OC[C@H]1O[C@@H](O)[C@@H](O)[C@@H](O)[C@@H]1O	Renshen	180.156	Book: Chemical Components of Source Plants in Traditional Chinese Medicine (ISBN: 9787030235534)	167	U.S. Patent Application No. 15/573,583.	1e-06	0.6714	0.26183	N/A	-3.22	6	5	1	In domain	-	0.9613	-	0.9596	+	0.8516	+	0.6714	Mitochondria	0.6869	-	0.8600	+	0.8770	+	0.9628	-	1.0000	-	0.9750	-	0.9797	-	0.9764	-	0.9943	-	0.7215	-	1.0000	-	0.8313	-
MOL002714	baicalein	Oc1cc2OC(=CC(=O)c2c(O)c1O)c3ccccc3	Banxia	270.237	Database: TCMSP (http://tcmspnw.com)	250	U.S. Patent Application No. 15/573,583.	1e-06	0.6714	0.261305	N/A	2.58	5	3	1	In domain	+	0.9833	-	0.9372	-	0.4632	+	0.6714	Mitochondria	0.5892	-	0.5665	+	0.9505	+	0.9480	+	0.6600	-	0.9750	-	0.8558	-	0.7133	-	0.9700	-	0.5997	-	1.0000	-	0.8553	+
renshen_159	Xylose	O[C@@H]1CO[C@@H](O)[C@H](O)[C@H]1O	Renshen	150.13	Book: Chemical Components of Source Plants in Traditional Chinese Medicine (ISBN: 9787030235534)	167	U.S. Patent Application No. 15/573,583.	1e-06	0.5571	0.260707	N/A	-2.58	5	4	0	In domain	-	0.8919	-	0.9400	+	0.8539	+	0.5571	Mitochondria	0.6529	-	0.8572	+	0.9690	+	0.9538	-	0.9800	-	0.9500	-	0.9759	-	0.9835	-	0.9769	-	0.6848	-	0.8035	-	0.8290	-
renshen_093	Beta-Maalienc	CC1=C2[C@H]3[C@@H](CC[C@]2(C)CCC1)C3(C)C	Renshen	204.351	Book: Chemical Components of Source Plants in Traditional Chinese Medicine (ISBN: 9787030235534)	167	U.S. Patent Application No. 15/573,583.	1e-06	0.7571	0.260294	N/A	4.56	0	0	0	In domain	+	0.9819	+	0.8831	+	0.9864	+	0.7571	Lysosomes	0.6504	-	0.8436	+	0.8887	+	0.9353	-	0.9400	-	0.7000	-	0.8770	-	0.8543	-	0.9319	+	0.5641	-	0.7890	-	0.7441	-
MOL000196	L-Bornyl acetate	CC(=O)O[C@@H]1C[C@@H]2CC[C@@]1(C)C2(C)C	Qinghao	196.286	Database: TCMSP (http://tcmspnw.com)	250	U.S. Patent Application No. 15/573,583.	1e-06	0.4857	0.260249	N/A	2.76	2	0	1	In domain	+	0.9800	+	0.8764	+	0.9676	-	0.5143	Mitochondria	0.7367	-	0.8478	+	0.9080	+	0.9612	-	0.8400	-	0.7000	-	0.9204	-	0.9504	-	0.9580	+	0.6025	+	0.5963	-	0.8728	-
qinghao_001	Acetylborneol	CC(=O)O[C@H]1C[C@@H]2CC[C@@]1(C)C2(C)C	Qinghao	196.286	Book: Chemical Components of Source Plants in Traditional Chinese Medicine (ISBN: 9787030235534)	250	U.S. Patent Application No. 15/573,583.	1e-06	0.4857	0.260249	N/A	2.76	2	0	1	In domain	+	0.9800	+	0.8764	+	0.9676	-	0.5143	Mitochondria	0.7367	-	0.8478	+	0.9080	+	0.9612	-	0.8400	-	0.7000	-	0.9204	-	0.9504	-	0.9580	+	0.6025	+	0.5963	-	0.8728	-
qinghao_082	Isoboroyl acetate	CC(=O)O[C@@H]1C[C@H]2CC[C@]1(C)C2(C)C	Qinghao	196.286	Book: Chemical Components of Source Plants in Traditional Chinese Medicine (ISBN: 9787030235534)	250	U.S. Patent Application No. 15/573,583.	1e-06	0.4857	0.260249	N/A	2.76	2	0	1	In domain	+	0.9800	+	0.8764	+	0.9676	-	0.5143	Mitochondria	0.7367	-	0.8478	+	0.9080	+	0.9612	-	0.8400	-	0.7000	-	0.9204	-	0.9504	-	0.9580	+	0.6025	+	0.5963	-	0.8728	-
renshen_008	Biotin	OC(=O)CCCC[C@@H]1SC[C@@H]2NC(=O)N[C@H]12	Renshen	244.311	Book: Chemical Components of Source Plants in Traditional Chinese Medicine (ISBN: 9787030235534)	167	U.S. Patent Application No. 15/573,583.	1e-06	0.9	0.258814	N/A	0.80	3	3	5	In domain	+	0.7946	-	0.8744	+	0.9955	+	0.9000	Mitochondria	0.7672	-	0.8520	+	0.9441	+	0.9480	-	0.8600	-	0.8000	-	0.8932	-	0.9428	-	0.8411	-	0.5864	+	0.6124	-	0.8281	-
fuling_009	Dodecenoic acid	OC(=O)CCCCCCCCCC=C	Fuling	198.302	Book: Chemical Components of Source Plants in Traditional Chinese Medicine (ISBN: 9787030235534)	250	U.S. Patent Application No. 15/573,583.	1e-06	0.4857	0.257604	N/A	3.77	1	1	10	In domain	+	0.8234	+	0.5347	+	0.8077	-	0.5143	Plasma membrane	0.4568	-	0.8515	+	0.9300	+	0.8638	-	0.9600	-	0.8500	-	0.6606	-	0.9691	-	0.9873	-	0.7097	+	0.6302	-	0.8602	-
qinghao_072	7-Hydroxy-6,8-dimethoxy coumarin	COc1cc2C=CC(=O)Oc2c(OC)c1O	Qinghao	222.194	Book: Chemical Components of Source Plants in Traditional Chinese Medicine (ISBN: 9787030235534)	250	U.S. Patent Application No. 15/573,583.	1e-06	0.5429	0.256979	N/A	1.52	5	1	2	In domain	+	0.9897	-	0.5570	-	0.4155	+	0.5429	Mitochondria	0.6686	-	1.0000	+	0.9209	+	0.9746	-	0.8200	-	1.0000	-	0.7453	-	0.8573	-	0.9549	-	0.6356	-	0.8431	-	0.8139	-
qinghao_083	Isofraxidin	COc1cc2C=CC(=O)Oc2c(OC)c1O	Qinghao	222.194	Book: Chemical Components of Source Plants in Traditional Chinese Medicine (ISBN: 9787030235534)	250	U.S. Patent Application No. 15/573,583.	1e-06	0.5429	0.256979	N/A	1.52	5	1	2	In domain	+	0.9897	-	0.5570	-	0.4155	+	0.5429	Mitochondria	0.6686	-	1.0000	+	0.9209	+	0.9746	-	0.8200	-	1.0000	-	0.7453	-	0.8573	-	0.9549	-	0.6356	-	0.8431	-	0.8139	-
MOL000397	cis-p-Coumarate	OC(=O)\C=C/c1ccc(O)cc1	Banxia	164.158	Database: TCMSP (http://tcmspnw.com)	250	U.S. Patent Application No. 15/573,583.	1e-06	0.4	0.256276	N/A	1.49	2	2	2	In domain	+	0.9711	+	0.8533	-	0.7372	-	0.6000	Mitochondria	0.8227	-	1.0000	+	0.9325	+	0.9445	-	0.8400	-	1.0000	-	0.9108	-	0.9890	-	0.9843	-	0.7537	-	0.6124	-	0.8682	-
renshen_125	Beta-Patchoulene	C[C@H]1CCC2=C1C[C@H]3CC[C@]2(C)C3(C)C	Renshen	204.351	Book: Chemical Components of Source Plants in Traditional Chinese Medicine (ISBN: 9787030235534)	167	U.S. Patent Application No. 15/573,583.	1e-06	0.7429	0.255412	N/A	4.56	0	0	0	In domain	+	0.9738	+	0.8941	+	0.9873	+	0.7429	Lysosomes	0.7381	-	0.8392	+	0.9276	+	0.9269	-	0.8600	-	0.6500	-	0.8706	-	0.9248	-	0.8950	+	0.5278	-	0.7907	-	0.7523	-
renshen_010	alpha-Cadinene	CC(C)[C@@H]1CC=C(C)[C@@H]2CCC(=C[C@@H]12)C	Renshen	204.351	Book: Chemical Components of Source Plants in Traditional Chinese Medicine (ISBN: 9787030235534)	167	U.S. Patent Application No. 15/573,583.	1e-06	0.7429	0.255412	N/A	4.58	0	0	1	In domain	+	0.9778	+	0.9154	+	0.9935	+	0.7429	Lysosomes	0.5648	-	0.8529	+	0.9516	+	0.8900	-	0.9600	-	0.7000	-	0.8808	-	0.9393	-	0.8956	-	0.5673	-	0.7977	-	0.6973	-
renshen_102	alpha-Muurolene	CC(C)[C@@H]1CC=C(C)[C@H]2CCC(=C[C@@H]12)C	Renshen	204.351	Book: Chemical Components of Source Plants in Traditional Chinese Medicine (ISBN: 9787030235534)	167	U.S. Patent Application No. 15/573,583.	1e-06	0.7429	0.255412	N/A	4.58	0	0	1	In domain	+	0.9778	+	0.9154	+	0.9935	+	0.7429	Lysosomes	0.5648	-	0.8529	+	0.9516	+	0.8900	-	0.9600	-	0.7000	-	0.8808	-	0.9393	-	0.8956	-	0.5673	-	0.7977	-	0.6973	-
MOL005316	MAV	O[C@H]1O[C@@H]([C@@H](O)[C@H](O)[C@@H]1O)C(=O)O	Renshen	194.139	Database: TCMSP (http://tcmspnw.com)	250	U.S. Patent Application No. 15/573,583.	1e-06	0.4714	0.25538	N/A	-3.13	6	5	1	In domain	-	0.9392	-	0.9635	+	0.7891	-	0.5286	Mitochondria	0.6781	-	0.8619	+	0.9365	+	0.9655	-	0.9800	-	1.0000	-	0.9914	-	0.9714	-	0.9969	-	0.7003	-	0.6068	-	0.8759	-
MOL008178	3-(2-keto-3-methyl-but-3-enyl)-4,8-dimethoxy-carbostyril	COC1=C(CC(=O)C(=C)C)C(=O)Nc2c(OC)cccc12	Changshan	287.31	Database: TCMSP (http://tcmspnw.com)	250	U.S. Patent Application No. 15/573,583.	1e-06	0.6857	0.251011	N/A	2.23	4	1	5	In domain	+	0.9840	+	0.7571	+	0.9173	+	0.6857	Mitochondria	0.5694	-	0.8594	+	0.9239	+	0.9397	-	0.8600	-	0.8250	-	0.4788	-	0.8544	-	0.7919	+	0.5843	-	0.5979	-	0.8401	+
huanglian_003	Columbamine	COc1cc2CC[n+]3cc4c(OC)c(OC)ccc4cc3c2cc1O	Huanglian	338.377	Book: Chemical Components of Source Plants in Traditional Chinese Medicine (ISBN: 9787030235534)	334	U.S. Patent Application No. 15/573,583.	1e-06	0.6	0.249154	N/A	3.08	4	1	3	In domain	+	0.7947	+	0.9330	+	0.9055	+	0.6000	Mitochondria	0.6178	-	0.8768	+	0.9310	+	0.9490	-	0.7800	+	0.6000	+	0.6771	-	0.4327	-	0.6700	+	0.5472	-	0.8169	+	0.3688	-
MOL000056	DTY	N[C@@H](Cc1ccc(O)cc1)C(=O)O	Banxia	181.189	Database: TCMSP (http://tcmspnw.com)	250	U.S. Patent Application No. 15/573,583.	1e-06	0.4286	0.24879	N/A	0.35	3	3	3	In domain	+	0.8447	+	0.5662	-	0.8406	-	0.5714	Mitochondria	0.5547	-	0.8663	+	0.9572	+	0.9514	-	0.9600	-	0.9500	-	0.9206	-	0.9927	-	0.9494	-	0.7665	-	0.6404	-	0.7186	-
qinghao_097	Norannuic acid	C[C@@H]1CC[C@H]([C@@H]2[C@H]1CCC(=C)[C@H]2O)C(=O)O	Qinghao	224.296	Book: Chemical Components of Source Plants in Traditional Chinese Medicine (ISBN: 9787030235534)	250	U.S. Patent Application No. 15/573,583.	1e-06	0.5286	0.247866	N/A	2.06	2	2	1	In domain	+	0.9788	-	0.6317	-	0.6773	+	0.5286	Mitochondria	0.7274	-	0.8485	+	0.9221	+	0.8972	-	1.0000	+	0.5250	-	0.9788	-	0.9666	-	0.9118	-	0.5000	-	0.6226	-	0.8423	-
renshen_013	Calarene	C[C@@H]1CCC=C2CC[C@@H]3[C@@H](C3(C)C)[C@@]12C	Renshen	204.351	Book: Chemical Components of Source Plants in Traditional Chinese Medicine (ISBN: 9787030235534)	167	U.S. Patent Application No. 15/573,583.	1e-06	0.7143	0.245579	N/A	4.42	0	0	0	In domain	+	0.9819	+	0.8713	+	0.9859	+	0.7143	Lysosomes	0.6549	-	0.8493	+	0.9308	+	0.9051	-	0.9400	-	0.7000	-	0.9207	-	0.8865	-	0.8702	-	0.5238	-	0.7890	-	0.7441	-
renshen_075	Ginsinsene	C[C@H]1CC[C@@H]2C3=C(C)CC[C@]13CC2(C)C	Renshen	204.351	Book: Chemical Components of Source Plants in Traditional Chinese Medicine (ISBN: 9787030235534)	167	U.S. Patent Application No. 15/573,583.	1e-06	0.7143	0.245579	N/A	4.56	0	0	0	In domain	+	0.9762	+	0.7278	+	0.9877	+	0.7143	Lysosomes	0.7289	-	0.8398	+	0.9129	+	0.9537	-	0.9400	-	0.6750	-	0.9281	-	0.9161	-	0.8955	+	0.5540	-	0.5969	-	0.7431	-
MOL002650	Coniferol	COc1cc(\C=C\CO)ccc1O	Zhishi	180.2	Database: TCMSP (http://tcmspnw.com)	167	U.S. Patent Application No. 15/573,583.	1e-06	0.6286	0.245079	N/A	1.41	3	2	3	In domain	+	0.9852	+	0.7944	+	0.8656	+	0.6286	Mitochondria	0.8365	-	1.0000	+	0.8960	+	0.9679	-	0.9800	-	0.9750	-	0.8651	-	0.9812	-	0.9683	-	0.6547	-	0.5973	-	0.6970	-
MOL008193	4,8-dimethoxy-1-methyl-3-(3-methyl-2-oxobutyl)quinolin-2-one	COC1=C(CC(=O)C(C)C)C(=O)N(C)c2c(OC)cccc12	Changshan	303.353	Database: TCMSP (http://tcmspnw.com)	250	U.S. Patent Application No. 15/573,583.	1e-06	0.7	0.242695	N/A	2.32	5	0	5	In domain	+	0.9875	+	0.9028	+	0.9658	+	0.7000	Mitochondria	0.6206	-	1.0000	+	0.9240	+	0.9420	-	0.6800	-	0.9250	+	0.5898	-	0.7454	-	0.7504	+	0.5856	+	0.6108	-	0.8375	-
qinghao_102	1,10-Oxy-alpha-myrcene hydroxide	CC(=C)[C@H](O)CCC1=CCOC1	Qinghao	168.233	Book: Chemical Components of Source Plants in Traditional Chinese Medicine (ISBN: 9787030235534)	250	U.S. Patent Application No. 15/573,583.	1e-06	0.3857	0.241129	N/A	1.66	2	1	4	In domain	+	0.9662	+	0.5792	+	0.9759	-	0.6143	Lysosomes	0.4854	-	0.8490	+	0.9487	+	0.9471	-	1.0000	-	0.7320	-	0.9152	-	0.9810	-	0.8596	-	0.5599	-	1.0000	-	0.7078	-
qinghao_096	Nootkatone	C[C@H]1CC(=O)C=C2CC[C@@H](C[C@]12C)C(=C)C	Qinghao	218.335	Book: Chemical Components of Source Plants in Traditional Chinese Medicine (ISBN: 9787030235534)	250	U.S. Patent Application No. 15/573,583.	1e-06	0.5	0.240856	N/A	3.90	1	0	1	In domain	+	0.9965	+	0.9070	+	0.9521	-	0.5000	Mitochondria	0.4737	-	1.0000	+	0.9106	+	0.9115	-	0.7800	+	0.5250	-	0.8188	-	0.9187	-	0.8212	+	0.5593	-	1.0000	-	0.8713	-
renshen_012	delta-Cadinene	CC(C)[C@@H]1CCC(=C2CCC(=C[C@@H]12)C)C	Renshen	204.351	Book: Chemical Components of Source Plants in Traditional Chinese Medicine (ISBN: 9787030235534)	167	U.S. Patent Application No. 15/573,583.	1e-06	0.7	0.240663	N/A	4.73	0	0	1	In domain	+	0.9778	+	0.9654	+	0.9895	+	0.7000	Lysosomes	0.5537	-	0.8450	+	0.9550	+	0.9372	-	0.9600	-	0.7000	-	0.8390	-	0.9104	-	0.8327	-	0.6025	-	0.7977	-	0.6973	-
renshen_080	alpha-Guriunene	C[C@H]1CC[C@H]2[C@H](C3=C(C)CC[C@H]13)C2(C)C	Renshen	204.351	Book: Chemical Components of Source Plants in Traditional Chinese Medicine (ISBN: 9787030235534)	167	U.S. Patent Application No. 15/573,583.	1e-06	0.7	0.240663	N/A	4.42	0	0	0	In domain	+	0.9819	+	0.8504	+	0.9877	+	0.7000	Lysosomes	0.6807	-	0.8423	+	0.9058	+	0.9657	-	0.9400	-	0.6750	-	0.9367	-	0.8414	-	0.8778	+	0.5659	-	0.7890	-	0.7441	-
fuling_004	Caprylic acid	CCCCCCCC(=O)O	Fuling	144.211	Book: Chemical Components of Source Plants in Traditional Chinese Medicine (ISBN: 9787030235534)	250	U.S. Patent Application No. 15/573,583.	1e-06	0.3286	0.239651	N/A	2.43	1	1	6	In domain	+	0.8417	+	0.8631	+	0.9725	-	0.6714	Mitochondria	0.5152	-	0.8358	+	0.8902	-	0.3662	-	1.0000	-	0.9250	-	0.9446	-	0.9862	-	0.9647	-	0.7568	+	0.6720	-	0.8901	-
qinghao_024	Bornyl isovalerianate	CC(C)CC(=O)O[C@@H]1C[C@H]2CC[C@]1(C)C2(C)C	Qinghao	238.366	Book: Chemical Components of Source Plants in Traditional Chinese Medicine (ISBN: 9787030235534)	250	U.S. Patent Application No. 15/573,583.	1e-06	0.5429	0.239545	N/A	3.79	2	0	3	In domain	+	0.9800	+	0.8876	+	0.9633	+	0.5429	Mitochondria	0.7375	-	0.8532	+	0.8862	+	0.8671	-	0.8400	-	0.7250	-	0.9202	-	0.8818	-	0.8725	+	0.6229	+	0.5963	-	0.8728	-
MOL000671	()-Menthol	CC(C)[C@H]1CC[C@H](C)C[C@@H]1O	Gancao	156.265	Database: TCMSP (http://tcmspnw.com)	167	U.S. Patent Application No. 15/573,583.	1e-06	0.5286	0.237658	N/A	2.44	1	1	1	In domain	+	0.9801	+	0.6690	+	0.9810	+	0.5286	Mitochondria	0.6714	-	0.8429	+	0.9562	+	0.9500	-	0.9800	-	0.8000	-	0.9437	-	0.9709	-	0.8708	-	0.6168	-	0.8151	-	0.6696	-
renshen_129	Pseudoginsenoside F 11	CCc1c(C)cccc1C[C@H](C)C=O	Renshen	190.281	Book: Chemical Components of Source Plants in Traditional Chinese Medicine (ISBN: 9787030235534)	167	U.S. Patent Application No. 15/573,583.	1e-06	0.6429	0.237375	N/A	2.93	1	0	4	In domain	+	0.9917	+	0.9026	+	0.9969	+	0.6429	Mitochondria	0.6055	-	0.8606	+	0.9117	+	0.9432	-	0.9200	-	0.8500	-	0.7026	-	0.9900	-	0.8852	-	0.6613	-	0.5824	-	0.7235	-
kushen_009	9alpha-Hydroxysophoramine	O[C@H]1C[C@H]2[C@@H]3[C@@H](CCCN3C1)CN4C(=O)C=CC=C24	Kushen	260.332	Book: Chemical Components of Source Plants in Traditional Chinese Medicine (ISBN: 9787030235534)	250	U.S. Patent Application No. 15/573,583.	1e-06	0.5857	0.236624	N/A	0.79	4	1	0	In domain	+	0.9779	+	0.8738	+	0.9874	+	0.5857	Mitochondria	0.8530	-	0.8611	+	0.9399	+	0.9523	-	0.5200	+	0.6500	-	0.8616	-	0.9700	-	0.6633	+	0.5559	-	1.0000	-	0.6662	-
qinghao_047	Coumarin	O=C1Oc2ccccc2C=C1	Qinghao	146.143	Book: Chemical Components of Source Plants in Traditional Chinese Medicine (ISBN: 9787030235534)	250	U.S. Patent Application No. 15/573,583.	1e-06	0.3286	0.236484	N/A	1.79	2	0	0	In domain	+	0.9883	+	0.9313	-	0.6306	-	0.6714	Mitochondria	0.4995	-	1.0000	+	0.8593	+	0.9795	-	0.9600	-	1.0000	-	0.8681	-	0.9776	-	0.9937	-	0.7848	-	1.0000	-	0.8441	-
renshen_113	Panaginsene	C[C@@H]1CC[C@@H]2C(C)(C)CC3=C(C)CC[C@]123	Renshen	204.351	Book: Chemical Components of Source Plants in Traditional Chinese Medicine (ISBN: 9787030235534)	167	U.S. Patent Application No. 15/573,583.	1e-06	0.6857	0.235746	N/A	4.56	0	0	0	In domain	+	0.9762	+	0.7973	+	0.9895	+	0.6857	Lysosomes	0.6746	-	0.8424	+	0.9028	+	0.9659	-	0.9400	-	0.6750	-	0.9395	-	0.8935	-	0.9201	+	0.5327	-	0.5969	-	0.7431	-
renshen_116	beta-Panasinsene	CC1(C)C[C@]23[C@H]1CC[C@@]2(C)CCCC3=C	Renshen	204.351	Book: Chemical Components of Source Plants in Traditional Chinese Medicine (ISBN: 9787030235534)	167	U.S. Patent Application No. 15/573,583.	1e-06	0.6714	0.23083	N/A	4.56	0	0	0	In domain	+	0.9762	+	0.8785	+	0.9882	+	0.6714	Lysosomes	0.7576	-	0.8427	+	0.8938	+	0.9219	-	0.9400	-	0.6750	-	0.9152	-	0.9243	-	0.9342	-	0.5306	-	0.5969	-	0.7431	-
renshen_118	beta-Panasinsene	CC1(C)C[C@]23[C@H]1CC[C@]2(C)CCCC3=C	Renshen	204.351	Book: Chemical Components of Source Plants in Traditional Chinese Medicine (ISBN: 9787030235534)	167	U.S. Patent Application No. 15/573,583.	1e-06	0.6714	0.23083	N/A	4.56	0	0	0	In domain	+	0.9762	+	0.8785	+	0.9882	+	0.6714	Lysosomes	0.7576	-	0.8427	+	0.8938	+	0.9219	-	0.9400	-	0.6750	-	0.9152	-	0.9243	-	0.9342	-	0.5306	-	0.5969	-	0.7431	-
MOL003536	T-Cadinol	CC(C)[C@@H]1CC[C@](C)(O)[C@@H]2CCC(=C[C@@H]12)C	Changshan	222.366	Database: TCMSP (http://tcmspnw.com)	250	U.S. Patent Application No. 15/573,583.	1e-06	0.4857	0.229726	N/A	3.78	1	1	1	In domain	+	0.9892	+	0.8660	+	0.8924	-	0.5143	Lysosomes	0.4594	-	0.8489	+	0.9414	+	0.9480	-	0.9800	-	0.6750	-	0.8915	-	0.9441	-	0.8538	+	0.5434	-	0.5471	-	0.7267	-
MOL000942	(1R,4S,4aR,8aR)-4-isopropyl-1,6-dimethyl-3,4,4a,7,8,8a-hexahydro-2H-naphthalen-1-ol	CC(C)[C@@H]1CC[C@@](C)(O)[C@@H]2CCC(=C[C@@H]12)C	Renshen	222.366	Database: TCMSP (http://tcmspnw.com)	250	U.S. Patent Application No. 15/573,583.	1e-06	0.4857	0.229726	N/A	3.78	1	1	1	In domain	+	0.9892	+	0.8660	+	0.8924	-	0.5143	Lysosomes	0.4594	-	0.8489	+	0.9414	+	0.9480	-	0.9800	-	0.6750	-	0.8915	-	0.9441	-	0.8538	+	0.5434	-	0.5471	-	0.7267	-
renshen_152	Tartaric acid	O[C@H]([C@H](O)C(=O)O)C(=O)O	Renshen	150.087	Book: Chemical Components of Source Plants in Traditional Chinese Medicine (ISBN: 9787030235534)	167	U.S. Patent Application No. 15/573,583.	1e-06	0.4857	0.227359	N/A	-2.12	4	4	3	In domain	+	0.6472	-	0.9768	+	0.8583	-	0.5143	Mitochondria	0.7202	-	0.8610	+	0.9748	+	0.9661	-	1.0000	-	0.9750	-	0.9812	-	0.9755	-	0.9977	-	0.8263	+	0.5973	-	0.8595	-
MOL003951	Benzyl isovalerate	CC(C)CC(=O)OCc1ccccc1	Qinghao	192.254	Database: TCMSP (http://tcmspnw.com)	250	U.S. Patent Application No. 15/573,583.	1e-06	0.4143	0.226647	N/A	2.78	2	0	4	In domain	+	0.9968	+	0.9574	+	0.9970	-	0.5857	Mitochondria	0.8139	-	1.0000	+	0.9367	+	0.9471	-	0.8200	-	0.8500	-	0.8477	-	0.9808	-	0.9692	-	0.6508	-	0.6071	-	0.8427	-
renshen_011	gamma-Cadinene	CC(C)[C@@H]1CCC(=C)[C@@H]2CCC(=C[C@@H]12)C	Renshen	204.351	Book: Chemical Components of Source Plants in Traditional Chinese Medicine (ISBN: 9787030235534)	167	U.S. Patent Application No. 15/573,583.	1e-06	0.6571	0.225913	N/A	4.58	0	0	1	In domain	+	0.9778	+	0.9185	+	0.9926	+	0.6571	Lysosomes	0.5920	-	0.8510	+	0.9099	+	0.9000	-	0.9600	-	0.7000	-	0.9137	-	0.9305	-	0.8949	-	0.5538	-	0.7977	-	0.6973	-
renshen_114	Panasinsanol A	CC1(C)C[C@]23[C@@H]1CC[C@@]2(C)CCC[C@]3(C)O	Renshen	222.366	Book: Chemical Components of Source Plants in Traditional Chinese Medicine (ISBN: 9787030235534)	167	U.S. Patent Application No. 15/573,583.	1e-06	0.7143	0.225683	N/A	3.75	1	1	0	In domain	+	0.9823	+	0.8683	+	0.9736	+	0.7143	Lysosomes	0.6282	-	0.8441	+	0.9305	+	0.9470	-	1.0000	-	0.8250	-	0.8759	-	0.9429	-	0.9435	+	0.5204	+	0.6198	-	0.7380	-
renshen_115	Panasinsanol B	CC1(C)C[C@]23[C@H]1CC[C@@]2(C)CCC[C@@]3(C)O	Renshen	222.366	Book: Chemical Components of Source Plants in Traditional Chinese Medicine (ISBN: 9787030235534)	167	U.S. Patent Application No. 15/573,583.	1e-06	0.7143	0.225683	N/A	3.75	1	1	0	In domain	+	0.9823	+	0.8683	+	0.9736	+	0.7143	Lysosomes	0.6282	-	0.8441	+	0.9305	+	0.9470	-	1.0000	-	0.8250	-	0.8759	-	0.9429	-	0.9435	+	0.5204	+	0.6198	-	0.7380	-
qinghao_099	15-Nor-10-hydroxy-oplopan-4-oic acid	CC(C)[C@@H]1CC[C@@](C)(O)[C@@H]2CC[C@@H]([C@@H]12)C(=O)O	Qinghao	240.339	Book: Chemical Components of Source Plants in Traditional Chinese Medicine (ISBN: 9787030235534)	250	U.S. Patent Application No. 15/573,583.	1e-06	0.5143	0.225063	N/A	2.53	2	2	2	In domain	+	0.9572	-	0.5724	-	0.2523	+	0.5143	Mitochondria	0.7916	-	0.8464	+	0.9374	+	0.9415	-	1.0000	-	0.6250	-	0.9364	-	0.9590	-	0.9016	+	0.5898	-	0.5708	-	0.8674	-
MOL005394	(Z)-2-methyl-5-[(1S,2R,4R)-2-methyl-3-methylene-2-norbornanyl]pent-2-en-1-ol	C\C(=C\CC[C@]1(C)[C@H]2CC[C@H](C2)C1=C)\CO	Renshen	220.35	Database: TCMSP (http://tcmspnw.com)	250	U.S. Patent Application No. 15/573,583.	1e-06	0.4714	0.225002	N/A	3.70	1	1	4	In domain	+	0.9812	+	0.7371	+	0.9752	-	0.5286	Lysosomes	0.8657	-	0.8509	+	0.8866	+	0.8642	-	0.8600	-	0.6750	-	0.5676	-	0.9581	-	0.6649	+	0.6031	-	0.7926	-	0.7824	-
renshen_021	Citric acid	OC(=O)CC(O)(CC(=O)O)C(=O)O	Renshen	192.124	Book: Chemical Components of Source Plants in Traditional Chinese Medicine (ISBN: 9787030235534)	167	U.S. Patent Application No. 15/573,583.	1e-06	0.6143	0.22464	N/A	-1.25	4	4	5	In domain	+	0.7691	-	0.8365	-	0.3067	+	0.6143	Mitochondria	0.7275	-	0.8492	+	0.9458	+	0.9516	-	1.0000	-	1.0000	-	0.9829	-	0.9870	-	0.9914	-	0.7844	+	0.6200	-	0.8600	-
gancao_090	5,6,7,8-Tetrahydro-2,4-dimethylquinoline	Cc1cc(C)c2CCCCc2n1	Gancao	161.244	Book: Chemical Components of Source Plants in Traditional Chinese Medicine (ISBN: 9787030235534)	167	U.S. Patent Application No. 15/573,583.	1e-06	0.5143	0.22409	N/A	2.58	1	0	0	In domain	+	0.9958	+	0.9223	+	1.0000	+	0.5143	Lysosomes	0.6197	-	0.8546	+	0.9712	+	0.9593	-	0.9400	-	0.5500	-	0.8319	-	0.9797	-	0.9318	-	0.7289	-	1.0000	-	0.7551	-
kushen_006	Formononetin	COc1ccc(cc1)C2=COc3cc(O)ccc3C2=O	Kushen	268.264	Book: Chemical Components of Source Plants in Traditional Chinese Medicine (ISBN: 9787030235534)	250	U.S. Patent Application No. 15/573,583.	1e-06	0.5714	0.224021	N/A	3.17	4	1	2	In domain	+	0.9911	+	0.9313	-	0.3715	+	0.5714	Mitochondria	0.8197	-	0.5884	+	0.9459	+	0.9964	-	0.7800	-	0.9250	-	0.7152	-	0.7771	-	0.8976	+	0.5699	-	0.8382	-	0.7720	+
kushen_011	Isokuraramine	CN1C[C@H](CO)C[C@H](C1)C2=CC=CC(=O)N2	Kushen	222.284	Book: Chemical Components of Source Plants in Traditional Chinese Medicine (ISBN: 9787030235534)	250	U.S. Patent Application No. 15/573,583.	1e-06	0.4714	0.223045	N/A	0.40	3	2	2	In domain	+	0.9871	+	0.7893	+	0.9859	-	0.5286	Mitochondria	0.8187	-	0.8556	+	0.9602	+	0.9414	-	0.6633	-	0.7500	-	0.8198	-	0.9839	-	0.6604	+	0.5135	-	1.0000	-	0.7313	-
kushen_024	(+)-Kuraramine	CN1C[C@@H](CO)C[C@H](C1)C2=CC=CC(=O)N2	Kushen	222.284	Book: Chemical Components of Source Plants in Traditional Chinese Medicine (ISBN: 9787030235534)	250	U.S. Patent Application No. 15/573,583.	1e-06	0.4714	0.223045	N/A	0.40	3	2	2	In domain	+	0.9871	+	0.7893	+	0.9859	-	0.5286	Mitochondria	0.8187	-	0.8556	+	0.9602	+	0.9414	-	0.6633	-	0.7500	-	0.8198	-	0.9839	-	0.6604	+	0.5135	-	1.0000	-	0.7313	-
MOL003896	7-Methoxy-2-methyl isoflavone	COc1ccc2C(=O)C(=C(C)Oc2c1)c3ccccc3	Gancao	266.291	Database: TCMSP (http://tcmspnw.com)	167	U.S. Patent Application No. 15/573,583.	1e-06	0.8429	0.222385	N/A	3.78	3	0	2	In domain	+	0.9927	+	0.9077	+	0.7766	+	0.8429	Mitochondria	0.7970	-	0.8646	+	0.9676	+	0.9960	-	0.9200	-	0.9750	+	0.6194	+	0.6581	-	0.9195	+	0.5304	-	0.8494	-	0.8309	-
qinghao_076	4-Hydroxy-2-isopropenyl-5-methylene-hexan-1-ol	CC(=C)[C@@H](O)C[C@@H](CO)C(=C)C	Qinghao	170.249	Book: Chemical Components of Source Plants in Traditional Chinese Medicine (ISBN: 9787030235534)	250	U.S. Patent Application No. 15/573,583.	1e-06	0.3571	0.220606	N/A	1.50	2	2	5	In domain	+	0.9771	-	0.5697	+	0.9625	-	0.6429	Mitochondria	0.4989	-	0.8508	+	0.9434	+	0.9624	-	1.0000	-	0.8500	-	0.9761	-	0.9717	-	0.9211	-	0.6598	-	0.8233	-	0.7384	-
qinghao_077	trans-5-Hydroxy-2-isopropenyl-5-methylhex-3-en-1-ol	CC(=C)[C@H](CO)\C=C\C(C)(C)O	Qinghao	170.249	Book: Chemical Components of Source Plants in Traditional Chinese Medicine (ISBN: 9787030235534)	250	U.S. Patent Application No. 15/573,583.	1e-06	0.3571	0.220606	N/A	1.50	2	2	4	In domain	+	0.9717	+	0.5678	+	0.9864	-	0.6429	Mitochondria	0.4542	-	0.8600	+	0.9346	+	0.9389	-	1.0000	-	0.8500	-	0.9145	-	0.9712	-	0.9388	-	0.6093	-	0.6153	-	0.8177	-
qinghao_067	beta-Farnesene	CC(=CCC\C(=C\CCC(=C)C=C)\C)C	Qinghao	204.351	Book: Chemical Components of Source Plants in Traditional Chinese Medicine (ISBN: 9787030235534)	250	U.S. Patent Application No. 15/573,583.	1e-06	0.4286	0.22059	N/A	5.20	0	0	7	In domain	+	0.9698	+	0.8952	+	0.9962	-	0.5714	Nucleus	0.6326	-	0.8545	+	0.9330	+	0.9322	-	0.9600	-	0.8000	-	0.6943	-	0.9495	-	0.9484	-	0.6041	-	0.8209	-	0.7550	-
MOL002526	3691-11-0	C[C@H]1CCC2=C(C)CC[C@H](C[C@@H]12)C(=C)C	Renshen	204.351	Database: TCMSP (http://tcmspnw.com)	250	U.S. Patent Application No. 15/573,583.	1e-06	0.4286	0.22059	N/A	4.73	0	0	1	In domain	+	0.9778	+	0.9301	+	0.9896	-	0.5714	Lysosomes	0.7069	-	0.8461	+	0.9340	+	0.9551	-	0.9600	-	0.7000	-	0.8170	-	0.8786	-	0.7936	-	0.5171	-	0.7977	-	0.6973	-
renshen_087	Isocitric acid	O[C@H]([C@@H](CC(=O)O)C(=O)O)C(=O)O	Renshen	192.124	Book: Chemical Components of Source Plants in Traditional Chinese Medicine (ISBN: 9787030235534)	167	U.S. Patent Application No. 15/573,583.	1e-06	0.6	0.219411	N/A	-1.39	4	4	5	In domain	+	0.9062	-	0.9846	-	0.6281	+	0.6000	Mitochondria	0.6836	-	0.8523	+	0.9576	+	0.9515	-	1.0000	-	1.0000	-	0.9902	-	0.9855	-	0.9872	-	0.7419	+	0.6015	-	0.8368	-
renshen_088	Isocitric acid b	O[C@@H]([C@H](CC(=O)O)C(=O)O)C(=O)O	Renshen	192.124	Book: Chemical Components of Source Plants in Traditional Chinese Medicine (ISBN: 9787030235534)	167	U.S. Patent Application No. 15/573,583.	1e-06	0.6	0.219411	N/A	-1.39	4	4	5	In domain	+	0.9062	-	0.9846	-	0.6281	+	0.6000	Mitochondria	0.6836	-	0.8523	+	0.9576	+	0.9515	-	1.0000	-	1.0000	-	0.9902	-	0.9855	-	0.9872	-	0.7419	+	0.6015	-	0.8368	-
renshen_089	Isocitric acid c	O[C@H]([C@H](CC(=O)O)C(=O)O)C(=O)O	Renshen	192.124	Book: Chemical Components of Source Plants in Traditional Chinese Medicine (ISBN: 9787030235534)	167	U.S. Patent Application No. 15/573,583.	1e-06	0.6	0.219411	N/A	-1.39	4	4	5	In domain	+	0.9062	-	0.9846	-	0.6281	+	0.6000	Mitochondria	0.6836	-	0.8523	+	0.9576	+	0.9515	-	1.0000	-	1.0000	-	0.9902	-	0.9855	-	0.9872	-	0.7419	+	0.6015	-	0.8368	-
renshen_090	Isocitric acid d	O[C@@H]([C@@H](CC(=O)O)C(=O)O)C(=O)O	Renshen	192.124	Book: Chemical Components of Source Plants in Traditional Chinese Medicine (ISBN: 9787030235534)	167	U.S. Patent Application No. 15/573,583.	1e-06	0.6	0.219411	N/A	-1.39	4	4	5	In domain	+	0.9062	-	0.9846	-	0.6281	+	0.6000	Mitochondria	0.6836	-	0.8523	+	0.9576	+	0.9515	-	1.0000	-	1.0000	-	0.9902	-	0.9855	-	0.9872	-	0.7419	+	0.6015	-	0.8368	-
qinghao_023	Benzyl D-2-methylbutyrate	CC[C@@H](C)C(=O)OCc1ccccc1	Qinghao	192.254	Book: Chemical Components of Source Plants in Traditional Chinese Medicine (ISBN: 9787030235534)	250	U.S. Patent Application No. 15/573,583.	1e-06	0.4	0.218824	N/A	2.78	2	0	4	In domain	+	0.9968	+	0.8757	+	1.0000	-	0.6000	Mitochondria	0.7187	-	0.8604	+	0.9052	+	0.9375	-	0.8200	-	0.8000	-	0.6553	-	0.9910	-	0.9749	-	0.6947	-	0.6071	-	0.8427	-
renshen_028	Dodecane	CCCCCCCCCCCC	Renshen	170.335	Book: Chemical Components of Source Plants in Traditional Chinese Medicine (ISBN: 9787030235534)	167	U.S. Patent Application No. 15/573,583.	1e-06	0.5286	0.218027	N/A	4.93	0	0	9	In domain	+	0.8865	+	0.9769	+	1.0000	+	0.5286	Lysosomes	0.5981	-	0.8461	+	0.9552	+	0.9429	-	0.9600	-	0.8000	-	0.7759	-	0.9637	-	0.9516	-	0.7947	-	0.8415	-	0.7215	-
renshen_003	Alloaromadendrene	C[C@@H]1CC[C@H]2[C@@H]1[C@H]3[C@@H](CCC2=C)C3(C)C	Renshen	204.351	Book: Chemical Components of Source Plants in Traditional Chinese Medicine (ISBN: 9787030235534)	167	U.S. Patent Application No. 15/573,583.	1e-06	0.6286	0.216115	N/A	4.27	0	0	0	In domain	+	0.9819	+	0.7657	+	0.9905	+	0.6286	Lysosomes	0.7069	-	0.8476	+	0.8678	+	0.9419	-	0.9400	-	0.6500	-	0.9662	-	0.9021	-	0.9018	+	0.5519	-	0.7890	-	0.7441	-
renshen_122	Panaxene	CC(=C)[C@@]12CC(C)(C)[C@@H]1CC[C@@]2(C)C=C	Renshen	204.351	Book: Chemical Components of Source Plants in Traditional Chinese Medicine (ISBN: 9787030235534)	167	U.S. Patent Application No. 15/573,583.	1e-06	0.6286	0.216115	N/A	4.58	0	0	2	In domain	+	0.9828	+	0.6679	+	0.9874	+	0.6286	Lysosomes	0.7286	-	0.8481	+	0.9440	+	0.8445	-	0.9000	-	0.6750	-	0.9493	-	0.9409	-	0.9222	-	0.5000	-	0.7731	-	0.7252	-
MOL000676	DBP	CCCCOC(=O)c1ccccc1C(=O)OCCCC	Renshen	278.343	Database: TCMSP (http://tcmspnw.com)	250	U.S. Patent Application No. 15/573,583.	1e-06	0.5714	0.215909	N/A	3.60	4	0	8	In domain	+	1.0000	+	0.9515	+	0.9831	+	0.5714	Mitochondria	0.8874	-	1.0000	+	0.9413	+	0.9563	-	1.0000	-	0.8500	-	0.7571	-	0.7061	-	0.9572	-	0.6311	-	0.8046	-	0.8123	-
qinghao_017	Artemisinol	C[C@H](CO)[C@H]1CC[C@H](C)[C@H]2CC[C@H](C)C[C@H]12	Qinghao	224.382	Book: Chemical Components of Source Plants in Traditional Chinese Medicine (ISBN: 9787030235534)	250	U.S. Patent Application No. 15/573,583.	1e-06	0.4571	0.214256	N/A	3.71	1	1	2	In domain	+	0.9856	+	0.8515	+	0.9937	-	0.5429	Lysosomes	0.7379	-	0.8457	+	0.9370	+	0.9050	-	0.9600	-	0.6500	-	0.8869	-	0.9177	-	0.7660	-	0.5391	-	0.8218	-	0.6843	-
qinghao_075	1beta Hydroxy-4(15),7-eudesmadiene	CC(C)C1=CC[C@@]2(C)[C@H](O)CCC(=C)[C@@H]2C1	Qinghao	220.35	Book: Chemical Components of Source Plants in Traditional Chinese Medicine (ISBN: 9787030235534)	250	U.S. Patent Application No. 15/573,583.	1e-06	0.4429	0.211399	N/A	3.70	1	1	1	In domain	+	0.9930	+	0.6829	+	0.8509	-	0.5571	Lysosomes	0.4786	-	0.8551	+	0.9206	-	0.2356	-	1.0000	-	0.6750	-	0.7441	-	0.9008	-	0.8228	+	0.5307	-	0.6499	-	0.6843	-
renshen_031	gamma-Elemene	CC(=C1CC[C@@](C)(C=C)[C@@H](C1)C(=C)C)C	Renshen	204.351	Book: Chemical Components of Source Plants in Traditional Chinese Medicine (ISBN: 9787030235534)	167	U.S. Patent Application No. 15/573,583.	1e-06	0.6143	0.211199	N/A	4.89	0	0	2	In domain	+	0.9772	+	0.6742	+	0.9941	+	0.6143	Lysosomes	0.6654	-	0.8509	+	0.9064	-	0.3499	-	0.8800	-	0.7000	-	0.8678	-	0.9379	-	0.8954	-	0.5000	-	0.7977	-	0.7640	-
renshen_139	beta-Selinene	CC(=C)[C@@H]1CC[C@@]2(C)CCCC(=C)[C@@H]2C1	Renshen	204.351	Book: Chemical Components of Source Plants in Traditional Chinese Medicine (ISBN: 9787030235534)	167	U.S. Patent Application No. 15/573,583.	1e-06	0.6143	0.211199	N/A	4.73	0	0	1	In domain	+	0.9828	+	0.8290	+	0.9897	+	0.6143	Lysosomes	0.7746	-	0.8480	+	0.9235	+	0.9095	-	0.9000	-	0.6750	-	0.8641	-	0.9247	-	0.8594	+	0.5294	-	0.7731	-	0.7252	-
MOL006268	preskimmianine	COC1=C(CC=C(C)C)C(=O)Nc2c(OC)c(OC)ccc12	Changshan	303.353	Database: TCMSP (http://tcmspnw.com)	250	U.S. Patent Application No. 15/573,583.	1e-06	0.6	0.208024	N/A	3.06	4	1	5	In domain	+	0.9911	+	0.9244	+	0.9098	+	0.6000	Mitochondria	0.5729	-	1.0000	+	0.9254	+	0.9471	-	0.8600	-	0.8750	-	0.5576	-	0.8310	-	0.7725	-	0.5212	-	0.7790	-	0.8344	+
renshen_133	Rhamnose	C[C@H](O)[C@H](O)[C@@H](O)[C@@H](O)C=O	Renshen	164.156	Book: Chemical Components of Source Plants in Traditional Chinese Medicine (ISBN: 9787030235534)	167	U.S. Patent Application No. 15/573,583.	1e-06	0.4857	0.207873	N/A	-2.35	5	4	4	In domain	+	0.8384	-	0.9214	+	0.8968	-	0.5143	Mitochondria	0.6942	-	0.8616	+	0.9485	+	0.9753	-	0.9800	-	1.0000	-	0.9767	-	0.9773	-	0.9796	-	0.7253	-	1.0000	-	0.7979	-
qinghao_113	Qinghaosu IV	C[C@@H]1CC[C@H]2[C@@H](C)C(=O)O[C@@H]3O[C@]4(C)O[C@]23[C@H]1C[C@H]4O	Qinghao	282.332	Book: Chemical Components of Source Plants in Traditional Chinese Medicine (ISBN: 9787030235534)	250	U.S. Patent Application No. 15/573,583.	1e-06	0.5571	0.207531	N/A	1.43	5	1	0	In domain	+	0.8383	+	0.7850	+	0.9119	+	0.5571	Mitochondria	0.6136	-	0.8545	+	0.9260	+	0.9137	-	0.9200	-	0.6500	-	0.9143	-	0.8858	-	0.8477	+	0.6655	-	1.0000	-	0.8390	-
qinghao_100	l-Oxo-2beta-[3-butanone]-3alpha-methyl-6beta-[2-propanoic acid]-cyclohexane	C[C@H]([C@@H]1CC[C@@H](C)[C@H](CCC(=O)C)C1=O)C(=O)O	Qinghao	254.322	Book: Chemical Components of Source Plants in Traditional Chinese Medicine (ISBN: 9787030235534)	250	U.S. Patent Application No. 15/573,583.	1e-06	0.5	0.206774	N/A	2.31	3	1	5	In domain	+	0.9698	+	0.8614	-	0.4436	-	0.5000	Mitochondria	0.9075	-	0.8558	+	0.9199	+	0.9537	-	0.9800	-	0.7750	-	0.8866	-	0.9091	-	0.7564	-	0.5702	+	0.6594	-	0.8782	-
MOL001103	[(3R)-3,7-dimethylocta-1,6-dien-3-yl] acetate	CC(=CCC[C@@](C)(OC(=O)C)C=C)C	Qinghao	196.286	Database: TCMSP (http://tcmspnw.com)	250	U.S. Patent Application No. 15/573,583.	1e-06	0.3857	0.206667	N/A	3.24	2	0	5	In domain	+	0.9703	+	0.7102	+	0.9896	-	0.6143	Mitochondria	0.5406	-	0.8543	+	0.9380	+	0.8483	-	0.9000	-	0.8750	-	0.8899	-	0.9718	-	0.9660	-	0.5425	-	0.7977	-	0.8708	-
qinghao_089	Linalyl acetate	CC(=CCC[C@](C)(OC(=O)C)C=C)C	Qinghao	196.286	Book: Chemical Components of Source Plants in Traditional Chinese Medicine (ISBN: 9787030235534)	250	U.S. Patent Application No. 15/573,583.	1e-06	0.3857	0.206667	N/A	3.24	2	0	5	In domain	+	0.9703	+	0.7102	+	0.9896	-	0.6143	Mitochondria	0.5406	-	0.8543	+	0.9380	+	0.8483	-	0.9000	-	0.8750	-	0.8899	-	0.9718	-	0.9660	-	0.5425	-	0.7977	-	0.8708	-
kushen_052	Mamanine	OC[C@H]1C[C@H](CN2CCCC[C@H]12)C3=CC=CC(=O)N3	Kushen	262.347	Book: Chemical Components of Source Plants in Traditional Chinese Medicine (ISBN: 9787030235534)	250	U.S. Patent Application No. 15/573,583.	1e-06	0.5143	0.206182	N/A	1.33	3	2	2	In domain	+	0.9872	+	0.6896	+	0.9843	+	0.5143	Mitochondria	0.8923	-	0.8591	+	0.9530	+	0.9476	-	0.6241	-	0.6000	-	0.6941	-	0.9447	-	0.6497	+	0.5251	-	1.0000	-	0.7010	-
MOL002904	Berlambine	COc1ccc2C=C3N(CCc4cc5OCOc5cc34)C(=O)c2c1OC	Huanglian	351.353	Database: TCMSP (http://tcmspnw.com)	334	U.S. Patent Application No. 15/573,583.	1e-06	0.5143	0.205679	N/A	2.97	6	0	2	In domain	+	0.9785	+	0.9038	+	0.9837	+	0.5143	Mitochondria	0.5321	-	1.0000	+	0.9369	+	0.9458	-	0.7400	-	0.6098	+	0.6984	+	0.7067	-	0.7904	+	0.5731	-	0.8027	-	0.8171	+
renshen_020	Choline	C[N+](C)(C)CCO	Renshen	104.171	Book: Chemical Components of Source Plants in Traditional Chinese Medicine (ISBN: 9787030235534)	167	U.S. Patent Application No. 15/573,583.	1e-06	0.3	0.202331	N/A	-0.32	1	1	2	In domain	-	0.9761	+	0.9313	+	0.9932	-	0.7000	Lysosomes	0.8089	-	0.8685	+	0.9631	+	0.9452	-	0.9800	-	0.8750	-	0.9620	-	0.9794	-	0.9761	-	0.7952	-	1.0000	-	0.7309	-
kushen_047	Kushenquinone A	COC1=CC(=O)C(=C(O)C1=O)C[C@@H](CC=C(C)C)C(=C)C	Kushen	290.354	Book: Chemical Components of Source Plants in Traditional Chinese Medicine (ISBN: 9787030235534)	250	U.S. Patent Application No. 15/573,583.	1e-06	0.5571	0.201798	N/A	3.42	4	1	6	In domain	+	0.9861	+	0.7504	+	0.9495	+	0.5571	Mitochondria	0.8183	-	1.0000	+	0.9192	+	0.9361	-	0.6400	-	0.8250	-	0.5599	-	0.8671	-	0.8058	-	0.5199	-	0.7931	-	0.8744	-
qinghao_053	3alpha,15-Dihydroxy cedrane	C[C@@H]1CC[C@H]2C(C)(C)[C@H]3C[C@@]12CC[C@@]3(O)CO	Qinghao	238.366	Book: Chemical Components of Source Plants in Traditional Chinese Medicine (ISBN: 9787030235534)	250	U.S. Patent Application No. 15/573,583.	1e-06	0.4571	0.201687	N/A	2.58	2	2	1	In domain	+	0.9369	+	0.6247	+	0.9544	-	0.5429	Lysosomes	0.4911	-	0.8507	+	0.9314	+	0.9394	-	0.9400	-	0.7792	-	0.8616	-	0.9518	-	0.8893	+	0.5248	-	0.5853	-	0.7763	-
renshen_154	n-Tridecane	CCCCCCCCCCCCC	Renshen	184.361	Book: Chemical Components of Source Plants in Traditional Chinese Medicine (ISBN: 9787030235534)	167	U.S. Patent Application No. 15/573,583.	1e-06	0.5286	0.201439	N/A	5.32	0	0	10	In domain	+	0.8865	+	0.9751	+	1.0000	+	0.5286	Lysosomes	0.5981	-	0.8469	+	0.9552	+	0.9429	-	0.9600	-	0.8000	-	0.7521	-	0.9575	-	0.9516	-	0.7947	-	0.8415	-	0.7215	-
renshen_137	Selina-4(15),7(11)-diene	CC(=C1CC[C@@]2(C)CCCC(=C)[C@H]2C1)C	Renshen	204.351	Book: Chemical Components of Source Plants in Traditional Chinese Medicine (ISBN: 9787030235534)	167	U.S. Patent Application No. 15/573,583.	1e-06	0.5857	0.201366	N/A	4.87	0	0	0	In domain	+	0.9819	+	0.8737	+	0.9912	+	0.5857	Lysosomes	0.6903	-	0.8479	+	0.8736	+	0.8614	-	0.9400	-	0.6750	-	0.8308	-	0.9093	-	0.9258	-	0.5077	-	0.7890	-	0.7441	-
renshen_140	gamma-Selinene	CC(=C1CC[C@@]2(C)CCCC(=C)[C@@H]2C1)C	Renshen	204.351	Book: Chemical Components of Source Plants in Traditional Chinese Medicine (ISBN: 9787030235534)	167	U.S. Patent Application No. 15/573,583.	1e-06	0.5857	0.201366	N/A	4.87	0	0	0	In domain	+	0.9819	+	0.8737	+	0.9912	+	0.5857	Lysosomes	0.6903	-	0.8479	+	0.8736	+	0.8614	-	0.9400	-	0.6750	-	0.8308	-	0.9093	-	0.9258	-	0.5077	-	0.7890	-	0.7441	-
MOL006595	(2R)-flavanone	O=C1C[C@@H](Oc2ccccc12)c3ccccc3	Kushen	224.255	Database: TCMSP (http://tcmspnw.com)	250	U.S. Patent Application No. 15/573,583.	1e-06	0.4286	0.201012	N/A	3.39	2	0	1	In domain	+	0.9959	+	0.7343	-	0.5592	-	0.5714	Mitochondria	0.6976	-	1.0000	+	0.9413	+	0.9874	-	0.9800	-	0.9750	-	0.6423	-	0.9384	-	0.9739	-	0.6426	-	0.8256	+	0.3744	-
qinghao_063	4alpha,5alpha-Epoxy-6alpha-hydroxy amorphan-12-ol	C[C@@H](CO)[C@@H]1CC[C@@H](C)[C@@H]2CC[C@@]3(C)O[C@H]3[C@]12O	Qinghao	254.365	Book: Chemical Components of Source Plants in Traditional Chinese Medicine (ISBN: 9787030235534)	250	U.S. Patent Application No. 15/573,583.	1e-06	0.4857	0.200827	N/A	1.96	3	2	2	In domain	+	0.9593	+	0.6989	+	0.9652	-	0.5143	Mitochondria	0.5853	-	0.8530	+	0.9106	+	0.9171	-	0.9800	-	0.7210	-	0.8291	-	0.9071	-	0.8183	+	0.5993	-	0.7980	-	0.7511	-
qinghao_093	Methylarteannuate	COC(=O)C(=C)[C@@H]1CC[C@@H](C)[C@@H]2CCC(=C[C@H]12)C	Qinghao	248.361	Book: Chemical Components of Source Plants in Traditional Chinese Medicine (ISBN: 9787030235534)	250	U.S. Patent Application No. 15/573,583.	1e-06	0.4714	0.199626	N/A	3.73	2	0	2	In domain	+	0.9958	+	0.8747	+	0.9664	-	0.5286	Plasma membrane	0.4992	-	0.8560	+	0.9338	+	0.8869	-	0.7400	-	0.7000	-	0.8024	-	0.9086	-	0.8155	+	0.5854	-	0.6039	-	0.8418	-
MOL007421	Quercetagetin-3,4'-dimethyl ether	COC1=C(Oc2cc(O)c(O)c(O)c2C1=O)c3ccc(OC)c(O)c3	Qinghao	346.288	Database: TCMSP (http://tcmspnw.com)	250	U.S. Patent Application No. 15/573,583.	1e-06	0.6571	0.199574	N/A	2.30	8	4	3	In domain	+	0.9840	+	0.6769	-	0.3937	+	0.6571	Mitochondria	0.6457	+	0.5732	+	0.9597	+	0.9828	+	0.5400	-	0.9750	-	0.7503	-	0.7062	-	0.8400	+	0.5445	-	0.6887	-	0.8370	+
qinghao_107	5,6,7,3’,4’-Pentahydroxy-3-methoxytlavone	COC1=C(Oc2cc(O)c(O)c(O)c2C1=O)c3ccc(O)c(O)c3	Qinghao	332.262	Book: Chemical Components of Source Plants in Traditional Chinese Medicine (ISBN: 9787030235534)	250	U.S. Patent Application No. 15/573,583.	1e-06	0.6286	0.198978	N/A	2.00	8	5	2	In domain	+	0.9840	-	0.6343	-	0.3891	+	0.6286	Mitochondria	0.6297	+	0.5802	+	0.9617	+	0.9904	+	0.5400	-	0.9250	-	0.7298	-	0.7816	-	0.9082	+	0.5286	-	0.6887	-	0.8370	+
qinghao_112	Pseudosantonin	C[C@H]1[C@@H]2[C@@H](O)C[C@@]3(C)C(=O)CCC(=C3[C@@H]2OC1=O)C	Qinghao	264.317	Book: Chemical Components of Source Plants in Traditional Chinese Medicine (ISBN: 9787030235534)	250	U.S. Patent Application No. 15/573,583.	1e-06	0.5	0.198955	N/A	1.61	4	1	0	In domain	+	0.9799	+	0.6454	+	0.8048	-	0.5000	Mitochondria	0.7109	-	0.8545	+	0.8971	+	0.9586	-	0.9400	+	0.5229	-	0.8668	-	0.8828	-	0.8881	+	0.5702	-	0.8217	-	0.8422	-
qinghao_060	Epoxyarteannuinic acid	C[C@H]1CC[C@@H]([C@@H]2[C@@H]1CC[C@@]3(C)O[C@@H]23)C(=C)C(=O)O	Qinghao	250.333	Book: Chemical Components of Source Plants in Traditional Chinese Medicine (ISBN: 9787030235534)	250	U.S. Patent Application No. 15/573,583.	1e-06	0.4714	0.198053	N/A	2.86	2	1	2	In domain	+	0.9755	+	0.8455	+	0.8965	-	0.5286	Mitochondria	0.4539	-	0.8550	+	0.9258	+	0.9422	-	0.9800	+	0.5250	-	0.9705	-	0.9294	-	0.8662	+	0.6078	+	0.6054	-	0.8837	-
renshen_009	beta-Bisabolene	CC(=CCCC(=C)[C@H]1CCC(=CC1)C)C	Renshen	204.351	Book: Chemical Components of Source Plants in Traditional Chinese Medicine (ISBN: 9787030235534)	167	U.S. Patent Application No. 15/573,583.	1e-06	0.5714	0.196449	N/A	5.04	0	0	4	In domain	+	0.9692	+	0.8545	+	0.9960	+	0.5714	Lysosomes	0.3961	-	0.8524	+	0.9324	+	0.8915	-	0.9400	-	0.7750	-	0.8264	-	0.9576	-	0.9102	-	0.5394	-	0.8110	-	0.7415	-
qinghao_062	4alpha,5alpha-Epoxy-6alpha-hydroxy amorphan-12-oic acid	C[C@H]([C@@H]1CC[C@@H](C)[C@@H]2CC[C@@]3(C)O[C@H]3[C@]12O)C(=O)O	Qinghao	268.349	Book: Chemical Components of Source Plants in Traditional Chinese Medicine (ISBN: 9787030235534)	250	U.S. Patent Application No. 15/573,583.	1e-06	0.5	0.195966	N/A	2.05	3	2	2	In domain	+	0.9228	+	0.7148	+	0.9137	-	0.5000	Mitochondria	0.6612	-	0.8546	+	0.8801	+	0.9036	-	1.0000	-	0.8571	-	0.9163	-	0.9043	-	0.8808	+	0.6103	-	0.5865	-	0.8605	-
qinghao_054	3, 5-Dihydroxy-6, 7, 3’, 4’-tetramethoxyflavone	COc1ccc(cc1OC)C2=C(O)C(=O)c3c(O)c(OC)c(OC)cc3O2	Qinghao	374.341	Book: Chemical Components of Source Plants in Traditional Chinese Medicine (ISBN: 9787030235534)	250	U.S. Patent Application No. 15/573,583.	1e-06	0.6857	0.192654	N/A	2.91	8	2	5	In domain	+	0.9889	+	0.7317	-	0.4399	+	0.6857	Mitochondria	0.7936	-	0.7113	+	0.9393	+	0.9480	+	0.5400	-	0.9500	-	0.6783	+	0.8566	-	0.6724	+	0.5641	-	0.6401	-	0.8296	-
qinghao_065	Eupatin	COc1ccc(cc1O)C2=C(O)C(=O)c3c(O)c(OC)c(OC)cc3O2	Qinghao	360.315	Book: Chemical Components of Source Plants in Traditional Chinese Medicine (ISBN: 9787030235534)	250	U.S. Patent Application No. 15/573,583.	1e-06	0.6571	0.191805	N/A	2.60	8	3	4	In domain	+	0.9889	+	0.7804	-	0.4399	+	0.6571	Mitochondria	0.7936	-	0.6966	+	0.9552	+	0.9480	+	0.5400	-	0.9500	-	0.6459	+	0.7128	-	0.7099	+	0.5634	-	0.6401	-	0.8296	-
renshen_079	alpha-Guaiene	C[C@H]1CC[C@H](CC2=C1CC[C@@H]2C)C(=C)C	Renshen	204.351	Book: Chemical Components of Source Plants in Traditional Chinese Medicine (ISBN: 9787030235534)	167	U.S. Patent Application No. 15/573,583.	1e-06	0.5571	0.191533	N/A	4.73	0	0	1	In domain	+	0.9778	+	0.9205	+	0.9896	+	0.5571	Lysosomes	0.7069	-	0.8477	+	0.9487	+	0.9551	-	0.9600	-	0.7000	-	0.8243	-	0.9052	-	0.8872	-	0.5882	-	0.7977	-	0.6973	-
qinghao_066	Eupatolitin	COc1cc2OC(=C(O)C(=O)c2c(O)c1OC)c3ccc(O)c(O)c3	Qinghao	346.288	Book: Chemical Components of Source Plants in Traditional Chinese Medicine (ISBN: 9787030235534)	250	U.S. Patent Application No. 15/573,583.	1e-06	0.6286	0.190918	N/A	2.30	8	4	3	In domain	+	0.9840	+	0.6426	-	0.4230	+	0.6286	Mitochondria	0.7985	-	0.5431	+	0.9605	+	0.9910	+	0.5400	-	0.9500	-	0.6565	-	0.5741	-	0.7733	+	0.5706	-	0.6887	-	0.8370	-
renshen_026	2,5-Dimethyl-7-hydroxy chromone	CC1=CC(=O)c2c(C)cc(O)cc2O1	Renshen	190.195	Book: Chemical Components of Source Plants in Traditional Chinese Medicine (ISBN: 9787030235534)	167	U.S. Patent Application No. 15/573,583.	1e-06	0.5143	0.189978	N/A	2.12	3	1	0	In domain	+	0.9874	+	0.8579	-	0.3381	+	0.5143	Mitochondria	0.6613	-	1.0000	+	0.9465	+	0.9930	-	0.7200	-	0.9500	-	0.9037	-	0.9360	-	0.9448	-	0.5956	-	0.8197	-	0.8503	-
MOL000254	eugenol	COc1cc(CC=C)ccc1O	Zhishi	164.201	Database: TCMSP (http://tcmspnw.com)	167	U.S. Patent Application No. 15/573,583.	1e-06	0.4429	0.189503	N/A	2.13	2	1	3	In domain	+	0.9856	+	0.7532	+	0.9263	-	0.5571	Mitochondria	0.7823	-	1.0000	+	0.8879	+	0.9744	-	0.9600	-	0.9500	-	0.9167	-	0.9786	-	0.9346	-	0.6353	-	0.6092	+	0.4730	-
MOL007419	eupatorin_qt	C[C@@]12CCC[C@](C)([C@H]1CC[C@]34CC(=C)[C@@](O)(CC[C@@H]23)C4)C(=O)O	Qinghao	318.45	Database: TCMSP (http://tcmspnw.com)	250	U.S. Patent Application No. 15/573,583.	1e-06	0.5714	0.188716	N/A	4.16	2	2	1	In domain	+	0.9684	+	0.9313	-	0.5378	+	0.5714	Mitochondria	0.7434	-	0.8598	+	0.8764	+	0.8362	-	0.9600	+	0.6081	-	0.6385	-	0.8357	-	0.8119	+	0.5822	-	0.5999	-	0.8675	-
qinghao_040	Chrysosplenol D	COC1=C(Oc2cc(OC)c(OC)c(O)c2C1=O)c3ccc(O)c(O)c3	Qinghao	360.315	Book: Chemical Components of Source Plants in Traditional Chinese Medicine (ISBN: 9787030235534)	250	U.S. Patent Application No. 15/573,583.	1e-06	0.6429	0.18766	N/A	2.60	8	3	4	In domain	+	0.9840	+	0.6434	-	0.4230	+	0.6429	Mitochondria	0.7784	-	0.6999	+	0.9640	+	0.9791	+	0.5400	-	0.9500	-	0.5629	-	0.4297	-	0.8163	+	0.5494	-	0.6887	-	0.8370	-
huanglian_010	Magnoflorine	COc1ccc2C[C@H]3c4c(CC[N+]3(C)C)cc(OC)c(O)c4c2c1O	Huanglian	342.409	Book: Chemical Components of Source Plants in Traditional Chinese Medicine (ISBN: 9787030235534)	334	U.S. Patent Application No. 15/573,583.	1e-06	0.4571	0.187579	N/A	3.01	4	2	2	In domain	-	0.9675	+	0.7448	+	0.9800	-	0.5429	Mitochondria	0.4996	-	0.8544	+	0.9156	+	0.9470	-	0.6800	-	0.5000	-	0.5817	-	0.7445	-	0.7215	+	0.5829	-	0.8000	+	0.5000	-
MOL005320	arachidonate	CCCCC\C=C\C\C=C\C\C=C\C\C=C\CCCC(=O)O	Renshen	304.467	Database: TCMSP (http://tcmspnw.com)	250	U.S. Patent Application No. 15/573,583.	1e-06	0.5429	0.187539	N/A	6.22	1	1	14	In domain	+	0.9087	+	0.5561	+	0.9646	+	0.5429	Plasma membrane	0.5465	-	0.8539	-	0.7739	-	0.5698	-	0.9600	-	0.9000	+	0.6943	-	0.6917	-	0.9609	-	0.6718	+	0.6276	-	0.8766	-
renshen_153	Tetradecane	CCCCCCCCCCCCCC	Renshen	198.388	Book: Chemical Components of Source Plants in Traditional Chinese Medicine (ISBN: 9787030235534)	167	U.S. Patent Application No. 15/573,583.	1e-06	0.5286	0.187197	N/A	5.71	0	0	11	In domain	+	0.8865	+	0.9737	+	1.0000	+	0.5286	Lysosomes	0.5981	-	0.8480	+	0.9552	+	0.9429	-	0.9600	-	0.8000	-	0.7355	-	0.9499	-	0.9516	-	0.7947	-	0.8415	-	0.7215	-
renshen_103	alpha-Neoclovene	CC1=CCC[C@]2(C)[C@@H]3CC[C@]12CC3(C)C	Renshen	204.351	Book: Chemical Components of Source Plants in Traditional Chinese Medicine (ISBN: 9787030235534)	167	U.S. Patent Application No. 15/573,583.	1e-06	0.5429	0.186651	N/A	4.56	0	0	0	In domain	+	0.9762	+	0.8835	+	0.9900	+	0.5429	Lysosomes	0.6741	-	0.8399	+	0.9311	+	0.9146	-	0.9400	-	0.6500	-	0.9113	-	0.9524	-	0.9324	-	0.5000	-	0.5969	-	0.7431	-
MOL000348	4-[(Z)-3-hydroxyprop-1-enyl]-2,6-dimethoxyphenol	COc1cc(\C=C/CO)cc(OC)c1O	Zhishi	210.226	Database: TCMSP (http://tcmspnw.com)	167	U.S. Patent Application No. 15/573,583.	1e-06	0.5571	0.18618	N/A	1.41	4	2	4	In domain	+	0.9852	+	0.6267	+	0.8967	+	0.5571	Mitochondria	0.7812	-	1.0000	+	0.7933	+	0.9726	-	0.9800	-	1.0000	-	0.8751	-	0.9529	-	0.9297	-	0.6506	-	0.5973	-	0.6970	-
qinghao_013	Artemisetin	COC1=C(Oc2cc(OC)c(OC)c(O)c2C1=O)c3ccc(OC)c(OC)c3	Qinghao	388.368	Book: Chemical Components of Source Plants in Traditional Chinese Medicine (ISBN: 9787030235534)	250	U.S. Patent Application No. 15/573,583.	1e-06	0.6857	0.185696	N/A	3.21	8	1	6	In domain	+	0.9889	+	0.7616	-	0.3348	+	0.6857	Mitochondria	0.7745	-	0.8638	+	0.9452	+	0.9817	+	0.5400	-	0.9750	-	0.4935	+	0.8854	-	0.7290	+	0.5461	-	0.6401	-	0.8296	-
fuling_033	Undecanoic acid	CCCCCCCCCCC(=O)O	Fuling	186.291	Book: Chemical Components of Source Plants in Traditional Chinese Medicine (ISBN: 9787030235534)	250	U.S. Patent Application No. 15/573,583.	1e-06	0.3286	0.185518	N/A	3.60	1	1	9	In domain	+	0.8417	+	0.7477	+	0.9725	-	0.6714	Mitochondria	0.5152	-	0.8447	+	0.8902	-	0.3662	-	1.0000	-	0.9250	-	0.7360	-	0.9678	-	0.9647	-	0.7568	+	0.6720	-	0.8901	-
MOL005272	13-Tetradecenyl acetate	CC(=O)OCCCCCCCCCCCCC=C	Renshen	254.408	Database: TCMSP (http://tcmspnw.com)	250	U.S. Patent Application No. 15/573,583.	1e-06	0.4429	0.183099	N/A	5.03	2	0	13	In domain	+	0.9703	+	0.6058	+	0.9961	-	0.5571	Mitochondria	0.4896	-	0.8512	+	0.9531	+	0.9165	-	0.9000	-	0.8000	+	0.6694	-	0.9141	-	0.9772	-	0.5581	-	0.7977	-	0.8708	-
MOL005356	Girinimbin	Cc1cc2c3ccccc3[nH]c2c4C=CC(C)(C)Oc14	Renshen	263.334	Database: TCMSP (http://tcmspnw.com)	250	U.S. Patent Application No. 15/573,583.	1e-06	0.4571	0.182564	N/A	4.81	1	1	0	In domain	+	0.9911	+	0.7692	+	0.9876	-	0.5429	Mitochondria	0.6552	-	0.8585	+	0.8817	+	0.9582	-	0.9800	-	0.9000	+	0.8443	-	0.5559	-	0.7489	+	0.5739	+	0.6194	-	0.7253	+
qinghao_114	Quercetagetin-3,4’-dimethyl ether	COC1=C(Oc2cc(O)c(O)c(O)c2C1=O)c3ccc(O)c(OC)c3	Qinghao	346.288	Book: Chemical Components of Source Plants in Traditional Chinese Medicine (ISBN: 9787030235534)	250	U.S. Patent Application No. 15/573,583.	1e-06	0.6	0.182232	N/A	2.30	8	4	3	In domain	+	0.9840	-	0.5215	-	0.3937	+	0.6000	Mitochondria	0.6457	+	0.5725	+	0.9536	+	0.9828	+	0.5400	-	0.9750	-	0.7111	-	0.6463	-	0.8896	+	0.5315	-	0.6887	-	0.8370	+
qinghao_132	5,7,8,3'-Tetrahydroxy-3,4'-dimethoxy flavone	COC1=C(Oc2c(O)c(O)cc(O)c2C1=O)c3ccc(OC)c(O)c3	Qinghao	346.288	Book: Chemical Components of Source Plants in Traditional Chinese Medicine (ISBN: 9787030235534)	250	U.S. Patent Application No. 15/573,583.	1e-06	0.6	0.182232	N/A	2.30	8	4	3	In domain	+	0.9840	+	0.6946	-	0.3937	+	0.6000	Mitochondria	0.6457	+	0.5761	+	0.9483	+	0.9828	+	0.5400	-	0.9750	-	0.7212	-	0.6716	-	0.8053	+	0.5186	-	0.6887	-	0.8370	+
renshen_030	beta-Elemene	CC(=C)[C@@H]1CC[C@@](C)(C=C)[C@@H](C1)C(=C)C	Renshen	204.351	Book: Chemical Components of Source Plants in Traditional Chinese Medicine (ISBN: 9787030235534)	167	U.S. Patent Application No. 15/573,583.	1e-06	0.5286	0.181735	N/A	4.75	0	0	3	In domain	+	0.9772	+	0.6561	+	0.9934	+	0.5286	Lysosomes	0.7164	-	0.8492	+	0.9570	-	0.2609	-	0.8800	-	0.6750	-	0.9468	-	0.9511	-	0.8570	+	0.5293	-	0.7977	-	0.7640	-
qinghao_104	Patuletin	COc1c(O)cc2OC(=C(O)C(=O)c2c1O)c3ccc(O)c(O)c3	Qinghao	332.262	Book: Chemical Components of Source Plants in Traditional Chinese Medicine (ISBN: 9787030235534)	250	U.S. Patent Application No. 15/573,583.	1e-06	0.5714	0.180872	N/A	2.00	8	5	2	In domain	+	0.9840	+	0.5446	-	0.3891	+	0.5714	Mitochondria	0.6297	-	0.5163	+	0.9542	+	0.9904	+	0.5400	-	0.9250	-	0.7223	-	0.7692	-	0.8805	+	0.5487	-	0.6887	-	0.8370	+
qinghao_037	Casticin	COC1=C(Oc2cc(OC)c(OC)c(O)c2C1=O)c3ccc(OC)c(O)c3	Qinghao	374.341	Book: Chemical Components of Source Plants in Traditional Chinese Medicine (ISBN: 9787030235534)	250	U.S. Patent Application No. 15/573,583.	1e-06	0.6429	0.180629	N/A	2.91	8	2	5	In domain	+	0.9889	+	0.7697	-	0.4399	+	0.6429	Mitochondria	0.7936	-	0.7173	+	0.9606	+	0.9480	+	0.5400	-	0.9500	-	0.5442	+	0.7898	-	0.7608	+	0.5447	-	0.6401	-	0.8296	-
qinghao_038	Casticin	COC1=C(Oc2cc(OC)c(OC)c(O)c2C1=O)c3ccc(OC)c(O)c3	Qinghao	374.341	Book: Chemical Components of Source Plants in Traditional Chinese Medicine (ISBN: 9787030235534)	250	U.S. Patent Application No. 15/573,583.	1e-06	0.6429	0.180629	N/A	2.91	8	2	5	In domain	+	0.9889	+	0.7697	-	0.4399	+	0.6429	Mitochondria	0.7936	-	0.7173	+	0.9606	+	0.9480	+	0.5400	-	0.9500	-	0.5442	+	0.7898	-	0.7608	+	0.5447	-	0.6401	-	0.8296	-
renshen_037	Ginsenol	CC1(C)C[C@@]2(O)[C@@]3(C)CCC[C@]2(C)[C@@H]1CC3	Renshen	222.366	Book: Chemical Components of Source Plants in Traditional Chinese Medicine (ISBN: 9787030235534)	167	U.S. Patent Application No. 15/573,583.	1e-06	0.5714	0.180534	N/A	3.75	1	1	0	In domain	+	0.9869	+	0.8186	+	0.9436	+	0.5714	Lysosomes	0.5393	-	0.8478	+	0.9315	+	0.9367	-	1.0000	-	0.6750	-	0.9256	-	0.9580	-	0.9349	+	0.5460	+	0.6248	-	0.7422	-
qinghao_078	5-Hydroxy-3,6,7,4'-tetramethoxytlavone	COC1=C(Oc2cc(OC)c(OC)c(O)c2C1=O)c3ccc(OC)cc3	Qinghao	358.342	Book: Chemical Components of Source Plants in Traditional Chinese Medicine (ISBN: 9787030235534)	250	U.S. Patent Application No. 15/573,583.	1e-06	0.6143	0.180299	N/A	3.20	7	1	5	In domain	+	0.9889	+	0.7201	-	0.3348	+	0.6143	Mitochondria	0.7745	-	0.8642	+	0.9319	+	0.9817	+	0.5400	-	0.9750	+	0.5956	+	0.9160	-	0.8241	+	0.5581	-	0.6401	-	0.8296	-
MOL000057	DIBP	CC(C)COC(=O)c1ccccc1C(=O)OCC(C)C	Gancao	278.343	Database: TCMSP (http://tcmspnw.com)	167	U.S. Patent Application No. 15/573,583.	1e-06	0.7143	0.180296	N/A	3.31	4	0	6	In domain	+	1.0000	+	0.7548	+	0.9883	+	0.7143	Mitochondria	0.8897	-	1.0000	+	0.9624	+	0.9491	-	0.9800	-	0.9500	-	0.5860	-	0.7358	-	0.9696	-	0.6815	-	0.6180	-	0.8493	-
MOL005016	Odoratin	COc1ccc(cc1O)C2=COc3cc(O)c(OC)cc3C2=O	Gancao	314.289	Database: TCMSP (http://tcmspnw.com)	167	U.S. Patent Application No. 15/573,583.	1e-06	0.8	0.178833	N/A	2.89	6	2	3	In domain	+	0.9911	+	0.8569	-	0.4399	+	0.8000	Mitochondria	0.8156	-	0.7025	+	0.9646	+	0.9738	-	0.7800	-	0.9500	-	0.6847	-	0.4299	-	0.8917	+	0.5515	-	0.8382	-	0.7720	-
renshen_025	Dibutyl oxalate	CCCCOC(=O)C(=O)OCCCC	Renshen	202.248	Book: Chemical Components of Source Plants in Traditional Chinese Medicine (ISBN: 9787030235534)	167	U.S. Patent Application No. 15/573,583.	1e-06	0.5143	0.178657	N/A	1.67	4	0	6	In domain	+	0.9886	+	0.9082	+	0.9912	+	0.5143	Mitochondria	0.7947	-	0.8477	+	0.9489	+	0.9522	-	0.9400	-	0.8750	-	0.8184	-	0.9406	-	0.9725	-	0.6590	-	0.8000	-	0.8346	-
MOL002907	Corchoroside A_qt	C[C@]12CC[C@H]3[C@@H](CC[C@]4(O)C[C@H](O)CC[C@@]34C=O)[C@@]1(O)CC[C@H]2C5=CC(=O)OC5	Huanglian	404.497	Database: TCMSP (http://tcmspnw.com)	334	U.S. Patent Application No. 15/573,583.	1e-06	0.5143	0.178657	N/A	1.90	6	3	2	In domain	+	0.9871	-	0.6663	-	0.2916	+	0.5143	Mitochondria	0.8347	-	1.0000	+	0.9413	+	0.9674	-	0.9600	-	0.7009	+	0.8409	-	0.9166	+	0.6086	+	0.6720	-	1.0000	-	0.9007	-
qinghao_021	Axillarin	COC1=C(Oc2cc(O)c(OC)c(O)c2C1=O)c3ccc(O)c(O)c3	Qinghao	346.288	Book: Chemical Components of Source Plants in Traditional Chinese Medicine (ISBN: 9787030235534)	250	U.S. Patent Application No. 15/573,583.	1e-06	0.5857	0.177889	N/A	2.30	8	4	3	In domain	+	0.9840	+	0.6691	-	0.3937	+	0.5857	Mitochondria	0.6457	+	0.5743	+	0.9578	+	0.9828	+	0.5400	-	0.9750	-	0.6966	-	0.5700	-	0.9074	+	0.5262	-	0.6887	-	0.8370	+
qinghao_133	S,6,3 ',4'-Tetrahydroxy-3,7-dimethoxyflavone	COC1=C(Oc2cc(OC)c(O)c(O)c2C1=O)c3ccc(O)c(O)c3	Qinghao	346.288	Book: Chemical Components of Source Plants in Traditional Chinese Medicine (ISBN: 9787030235534)	250	U.S. Patent Application No. 15/573,583.	1e-06	0.5857	0.177889	N/A	2.30	8	4	3	In domain	+	0.9840	-	0.5160	-	0.4230	+	0.5857	Mitochondria	0.7985	+	0.5741	+	0.9605	+	0.9910	+	0.5400	-	0.9500	-	0.6832	-	0.6140	-	0.7904	+	0.5503	-	0.6887	-	0.8370	-
MOL000519	coniferin	C[C@@H](CO)C1=C(O)C(=O)c2c3CCCC(C)(C)c3ccc2C1=O	Banxia	314.376	Database: TCMSP (http://tcmspnw.com)	250	U.S. Patent Application No. 15/573,583.	1e-06	0.5286	0.176844	N/A	3.12	4	2	2	In domain	+	0.9916	+	0.6727	+	0.8704	+	0.5286	Mitochondria	0.8320	-	0.8557	+	0.8184	+	0.8456	-	0.8800	-	0.6223	-	0.6080	-	0.8868	-	0.7272	+	0.5422	-	1.0000	-	0.8688	-
qinghao_011	Arteannuin G	C[C@@H]1CC[C@H]2[C@@H](C)C(=O)O[C@H](OC(=O)C)[C@]23OCC[C@@H]13	Qinghao	282.332	Book: Chemical Components of Source Plants in Traditional Chinese Medicine (ISBN: 9787030235534)	250	U.S. Patent Application No. 15/573,583.	1e-06	0.4714	0.175606	N/A	1.89	5	0	1	In domain	+	0.9291	+	0.8666	+	0.9173	-	0.5286	Mitochondria	0.8038	-	0.8539	+	0.9259	+	0.9666	-	1.0000	-	0.5750	-	0.9279	-	0.8247	-	0.8476	+	0.6441	-	0.7904	-	0.8582	-
MOL003561	isopimpinellin	COc1c2OC(=O)C=Cc2c(OC)c3ccoc13	Zhishi	246.215	Database: TCMSP (http://tcmspnw.com)	167	U.S. Patent Application No. 15/573,583.	1e-06	0.6143	0.175288	N/A	2.56	5	0	2	In domain	+	0.9916	+	0.7150	+	0.9026	+	0.6143	Mitochondria	0.6440	-	1.0000	+	0.9572	-	0.5699	-	0.9200	-	1.0000	-	0.7928	-	0.7855	-	0.9404	-	0.6180	-	1.0000	-	0.8151	+
huanglian_009	Limonin	CC1(C)O[C@H]2CC(=O)OC[C@]23[C@H]4CC[C@@]5(C)[C@@H](OC(=O)[C@H]6O[C@@]56[C@]4(C)C(=O)C[C@@H]13)c7cocc7	Huanglian	470.512	Book: Chemical Components of Source Plants in Traditional Chinese Medicine (ISBN: 9787030235534)	334	U.S. Patent Application No. 15/573,583.	1e-06	0.5857	0.174913	N/A	3.14	8	0	1	In domain	+	0.9749	-	0.7064	+	0.9674	+	0.5857	Mitochondria	0.8017	-	1.0000	+	0.8567	+	0.9807	-	0.9200	-	0.7500	+	0.9293	+	0.7047	-	0.5097	+	0.6615	-	0.6043	-	0.8231	+
huanglian_011	Obaculactone	CC1(C)O[C@H]2CC(=O)OC[C@]23[C@H]4CC[C@@]5(C)[C@@H](OC(=O)[C@H]6O[C@@]56[C@]4(C)C(=O)C[C@@H]13)c7cocc7	Huanglian	470.512	Book: Chemical Components of Source Plants in Traditional Chinese Medicine (ISBN: 9787030235534)	334	U.S. Patent Application No. 15/573,583.	1e-06	0.5857	0.174913	N/A	3.14	8	0	1	In domain	+	0.9749	-	0.7064	+	0.9674	+	0.5857	Mitochondria	0.8017	-	1.0000	+	0.8567	+	0.9807	-	0.9200	-	0.7500	+	0.9293	+	0.7047	-	0.5097	+	0.6615	-	0.6043	-	0.8231	+
renshen_126	n-Pentadecane	CCCCCCCCCCCCCCC	Renshen	212.415	Book: Chemical Components of Source Plants in Traditional Chinese Medicine (ISBN: 9787030235534)	167	U.S. Patent Application No. 15/573,583.	1e-06	0.5286	0.174836	N/A	6.10	0	0	12	In domain	+	0.8865	+	0.9659	+	1.0000	+	0.5286	Lysosomes	0.5981	-	0.8488	+	0.9552	+	0.9429	-	0.9600	-	0.8000	-	0.7124	-	0.9438	-	0.9516	-	0.7947	-	0.8415	-	0.7215	-
MOL001818	Methyl palmitelaidate	CCCCCC\C=C\CCCCCCCC(=O)OC	Banxia	268.435	Database: TCMSP (http://tcmspnw.com)	250	U.S. Patent Application No. 15/573,583.	1e-06	0.4429	0.173531	N/A	5.42	2	0	13	In domain	+	0.9567	+	0.9413	+	0.9958	-	0.5571	Plasma membrane	0.6788	-	0.8483	+	0.8111	+	0.8599	-	0.9000	-	0.8750	+	0.6745	-	0.8083	-	0.9178	-	0.6016	-	1.0000	-	0.8696	-
MOL001818	Methyl palmitelaidate	CCCCCC\C=C\CCCCCCCC(=O)OC	Renshen	268.435	Database: TCMSP (http://tcmspnw.com)	250	U.S. Patent Application No. 15/573,583.	1e-06	0.4429	0.173531	N/A	5.42	2	0	13	In domain	+	0.9567	+	0.9413	+	0.9958	-	0.5571	Plasma membrane	0.6788	-	0.8483	+	0.8111	+	0.8599	-	0.9000	-	0.8750	+	0.6745	-	0.8083	-	0.9178	-	0.6016	-	1.0000	-	0.8696	-
MOL000304	Ethyl glucoside	CCO[C@@H]1O[C@H](CO)[C@@H](O)[C@H](O)[C@H]1O	Fuling	208.209	Database: TCMSP (http://tcmspnw.com)	250	U.S. Patent Application No. 15/573,583.	1e-06	0.3429	0.173212	N/A	-2.18	6	4	3	In domain	-	0.9703	-	0.8962	+	0.8966	-	0.6571	Mitochondria	0.7289	-	0.8561	+	0.9297	+	0.9633	-	0.9800	-	0.9500	-	0.9638	-	0.9617	-	0.9867	-	0.5928	-	1.0000	-	0.8487	-
qinghao_044	Cirsiliol	COc1cc2OC(=CC(=O)c2c(O)c1OC)c3ccc(O)c(O)c3	Qinghao	330.289	Book: Chemical Components of Source Plants in Traditional Chinese Medicine (ISBN: 9787030235534)	250	U.S. Patent Application No. 15/573,583.	1e-06	0.5429	0.172877	N/A	2.59	7	3	3	In domain	+	0.9840	+	0.7792	-	0.4230	+	0.5429	Mitochondria	0.7985	-	0.5630	+	0.9465	+	0.9910	+	0.5400	-	0.9500	-	0.6402	-	0.5131	-	0.8260	+	0.5385	-	0.6887	-	0.8370	-
qinghao_073	3alpha-Hydroxy-4alpha,5alpha-epoxy-7-oxo-(8|7->6|-abeoamorphane	CC(C)C(=O)[C@]12CC[C@@H](C)[C@@H]1C[C@@H](O)[C@@]3(C)O[C@@H]23	Qinghao	252.349	Book: Chemical Components of Source Plants in Traditional Chinese Medicine (ISBN: 9787030235534)	250	U.S. Patent Application No. 15/573,583.	1e-06	0.4143	0.172673	N/A	2.17	3	1	2	In domain	+	0.9708	+	0.6321	+	0.9711	-	0.5857	Mitochondria	0.5397	-	0.8440	+	0.9232	+	0.9700	-	1.0000	-	0.6750	-	0.9343	-	0.9249	-	0.8541	+	0.6183	-	0.8214	-	0.7632	-
fuling_018	Laurie acid	CCCCCCCCCCCC(=O)O	Fuling	200.318	Book: Chemical Components of Source Plants in Traditional Chinese Medicine (ISBN: 9787030235534)	250	U.S. Patent Application No. 15/573,583.	1e-06	0.3286	0.172528	N/A	3.99	1	1	10	In domain	+	0.8417	+	0.7507	+	0.9725	-	0.6714	Mitochondria	0.5152	-	0.8460	+	0.8902	-	0.3662	-	1.0000	-	0.9250	-	0.6964	-	0.9707	-	0.9647	-	0.7568	+	0.6720	-	0.8901	-
fuling_006	Dehydroabietic acid methyl ester	COC(=O)[C@]1(C)CCC[C@@]2(C)[C@H]1CCc3cc(ccc23)C(C)C	Fuling	314.462	Book: Chemical Components of Source Plants in Traditional Chinese Medicine (ISBN: 9787030235534)	250	U.S. Patent Application No. 15/573,583.	1e-06	0.5143	0.172012	N/A	4.99	2	0	2	In domain	+	0.9971	+	0.8815	+	0.9778	+	0.5143	Mitochondria	0.5573	-	1.0000	+	0.9485	+	0.9437	-	0.8400	-	0.6750	+	0.7249	-	0.6356	-	0.5379	+	0.6227	-	0.8012	-	0.7495	-
renshen_016	alpha-Cedrol	C[C@@H]1CC[C@H]2C(C)(C)[C@H]3C[C@@]12CC[C@@]3(C)O	Renshen	222.366	Book: Chemical Components of Source Plants in Traditional Chinese Medicine (ISBN: 9787030235534)	167	U.S. Patent Application No. 15/573,583.	1e-06	0.5429	0.171529	N/A	3.61	1	1	0	In domain	+	0.9745	+	0.6440	+	0.9766	+	0.5429	Lysosomes	0.6146	-	0.8476	+	0.9517	+	0.9479	-	0.9400	-	0.8750	-	0.9380	-	0.9482	-	0.9278	-	0.5000	+	0.6165	-	0.7496	-
renshen_105	Neointermedeol	CC(=C)[C@@H]1CC[C@@]2(C)CCC[C@](C)(O)[C@@H]2C1	Renshen	222.366	Book: Chemical Components of Source Plants in Traditional Chinese Medicine (ISBN: 9787030235534)	167	U.S. Patent Application No. 15/573,583.	1e-06	0.5429	0.171529	N/A	3.92	1	1	1	In domain	+	0.9916	+	0.7809	+	0.8318	+	0.5429	Lysosomes	0.6062	-	0.8460	+	0.9445	+	0.8782	-	0.9800	-	0.5500	-	0.8052	-	0.9458	-	0.8755	+	0.5464	+	0.5024	-	0.7533	-
MOL005305	Nepetin	COc1c(O)cc2OC(=CC(=O)c2c1O)c3ccc(O)c(O)c3	Renshen	316.262	Database: TCMSP (http://tcmspnw.com)	250	U.S. Patent Application No. 15/573,583.	1e-06	0.5143	0.171033	N/A	2.29	7	4	2	In domain	+	0.9840	+	0.7570	-	0.3891	+	0.5143	Mitochondria	0.6297	-	0.5435	+	0.9456	+	0.9904	+	0.5400	-	0.9250	-	0.7160	-	0.7309	-	0.9155	+	0.5166	-	0.6887	-	0.8370	+
MOL004807	glucuronic acid	O[C@@H]1O[C@@H]([C@@H](O)[C@H](O)[C@H]1O)C(=O)O	Gancao	194.139	Database: TCMSP (http://tcmspnw.com)	167	U.S. Patent Application No. 15/573,583.	1e-06	0.4714	0.170594	N/A	-3.13	6	5	1	In domain	-	0.9392	-	0.9635	+	0.7891	-	0.5286	Mitochondria	0.6781	-	0.8619	+	0.9365	+	0.9655	-	0.9800	-	1.0000	-	0.9914	-	0.9714	-	0.9969	-	0.7003	-	0.6068	-	0.8759	-
renshen_077	Glucuronic acid	O[C@H]1O[C@@H]([C@@H](O)[C@@H](O)[C@H]1O)C(=O)O	Renshen	194.139	Book: Chemical Components of Source Plants in Traditional Chinese Medicine (ISBN: 9787030235534)	167	U.S. Patent Application No. 15/573,583.	1e-06	0.4714	0.170594	N/A	-3.13	6	5	1	In domain	-	0.9392	-	0.9635	+	0.7891	-	0.5286	Mitochondria	0.6781	-	0.8619	+	0.9365	+	0.9655	-	0.9800	-	1.0000	-	0.9914	-	0.9714	-	0.9969	-	0.7003	-	0.6068	-	0.8759	-
qinghao_068	Farnesyl acetate	CC(=CCC\C(=C/CC\C(=C/COC(=O)C)\C)\C)C	Qinghao	264.403	Book: Chemical Components of Source Plants in Traditional Chinese Medicine (ISBN: 9787030235534)	250	U.S. Patent Application No. 15/573,583.	1e-06	0.4286	0.170489	N/A	4.97	2	0	8	In domain	+	0.9703	+	0.8698	+	0.9932	-	0.5714	Mitochondria	0.6095	-	0.8528	+	0.9427	+	0.8637	-	0.9000	-	0.7750	+	0.7166	-	0.8317	-	0.9764	-	0.5646	-	0.7977	-	0.8708	-
qinghao_064	Eudesm-4(15)-ene-1beta,6alpha-diol	CC(C)[C@@H]1CC[C@@]2(C)[C@H](O)CCC(=C)[C@@H]2[C@H]1O	Qinghao	238.366	Book: Chemical Components of Source Plants in Traditional Chinese Medicine (ISBN: 9787030235534)	250	U.S. Patent Application No. 15/573,583.	1e-06	0.3857	0.170183	N/A	2.75	2	2	1	In domain	+	0.9930	-	0.5975	-	0.4563	-	0.6143	Mitochondria	0.5452	-	0.8525	+	0.9340	+	0.8850	-	1.0000	-	0.6500	-	0.8771	-	0.9081	-	0.8748	+	0.5713	-	0.6499	-	0.6843	-
qinghao_070	Friedelan-3-one	C[C@H]1C(=O)CC[C@@H]2[C@]1(C)CC[C@H]3[C@@]2(C)CC[C@@]4(C)[C@@H]5CC(C)(C)CC[C@]5(C)CC[C@]34C	Qinghao	426.717	Book: Chemical Components of Source Plants in Traditional Chinese Medicine (ISBN: 9787030235534)	250	U.S. Patent Application No. 15/573,583.	1e-06	0.6857	0.169007	N/A	8.46	1	0	0	Warning	+	0.9858	+	0.5120	+	0.9930	+	0.6857	Mitochondria	0.6105	-	0.7279	+	0.9414	+	0.9794	-	0.9600	-	0.8000	+	0.8398	-	0.6968	-	0.8504	+	0.6488	-	0.7483	-	0.7683	-
qinghao_101	l-Oxo-2beta-[3-butanone]-3alpha-methyl-6beta-[2-propanol formyl ester] cyclohexane	C[C@@H](COC=O)[C@@H]1CC[C@@H](C)[C@H](CCC(=O)C)C1=O	Qinghao	268.349	Book: Chemical Components of Source Plants in Traditional Chinese Medicine (ISBN: 9787030235534)	250	U.S. Patent Application No. 15/573,583.	1e-06	0.4286	0.167982	N/A	2.40	4	0	7	In domain	+	0.9865	+	0.7123	+	0.9569	-	0.5714	Mitochondria	0.9212	-	0.8548	+	0.9153	+	0.9546	-	0.8400	-	0.7000	-	0.5764	-	0.8700	-	0.6385	+	0.5215	-	0.5955	-	0.8655	-
qinghao_006	Areapillin	COc1cc(C2=CC(=O)c3c(O)c(OC)c(OC)cc3O2)c(O)cc1O	Qinghao	360.315	Book: Chemical Components of Source Plants in Traditional Chinese Medicine (ISBN: 9787030235534)	250	U.S. Patent Application No. 15/573,583.	1e-06	0.5714	0.16679	N/A	2.60	8	3	4	In domain	+	0.9889	+	0.7786	-	0.3998	+	0.5714	Mitochondria	0.6343	-	0.7034	+	0.8937	+	0.8767	+	0.5400	-	0.9750	-	0.6138	+	0.6460	-	0.7024	+	0.5471	-	0.6401	-	0.8296	+
qinghao_127	Tamarixetin	COc1ccc(cc1O)C2=C(O)C(=O)c3c(O)cc(O)cc3O2	Qinghao	316.262	Book: Chemical Components of Source Plants in Traditional Chinese Medicine (ISBN: 9787030235534)	250	U.S. Patent Application No. 15/573,583.	1e-06	0.5	0.166277	N/A	2.29	7	4	2	In domain	+	0.9889	+	0.9313	-	0.4148	-	0.5000	Mitochondria	0.6494	-	0.5136	+	0.8892	+	0.9480	+	0.5400	-	0.9250	-	0.7425	-	0.8647	-	0.6540	+	0.5993	-	0.6401	-	0.8296	+
MOL005370	NN-Dimethyldecanamide	CCCCCCCCCC(=O)N(C)C	Renshen	199.333	Database: TCMSP (http://tcmspnw.com)	250	U.S. Patent Application No. 15/573,583.	1e-06	0.3143	0.165835	N/A	3.22	1	0	8	In domain	+	0.8781	+	0.9337	+	0.9964	-	0.6857	Mitochondria	0.3424	-	0.8499	+	0.9190	+	0.9430	-	0.9200	-	0.6750	-	0.7635	-	0.9765	-	0.9312	-	0.5933	-	1.0000	-	0.8476	-
renshen_083	Hexadecane	CCCCCCCCCCCCCCCC	Renshen	226.441	Book: Chemical Components of Source Plants in Traditional Chinese Medicine (ISBN: 9787030235534)	167	U.S. Patent Application No. 15/573,583.	1e-06	0.5286	0.164006	N/A	6.49	0	0	13	In domain	+	0.8865	+	0.9629	+	1.0000	+	0.5286	Lysosomes	0.5981	-	0.8462	+	0.9552	+	0.9429	-	0.9600	-	0.8000	-	0.6493	-	0.9287	-	0.9516	-	0.7947	-	0.8415	-	0.7215	-
MOL001599	α-cubebol	CC1=C[C@@H]2[C@H](CC1)[C@](C)(O)CCC2(C)C	Gancao	208.34	Database: TCMSP (http://tcmspnw.com)	167	U.S. Patent Application No. 15/573,583.	1e-06	0.4857	0.163788	N/A	3.53	1	1	0	In domain	+	0.9906	+	0.8502	+	0.8924	-	0.5143	Lysosomes	0.4594	-	0.8415	+	0.9184	+	0.9480	-	1.0000	-	0.6750	-	0.8536	-	0.9370	-	0.9243	+	0.5471	-	0.5471	-	0.7666	-
MOL000417	Calycosin	COc1ccc(cc1O)C2=COc3cc(O)ccc3C2=O	Gancao	284.263	Database: TCMSP (http://tcmspnw.com)	167	U.S. Patent Application No. 15/573,583.	1e-06	0.6571	0.162404	N/A	2.88	5	2	2	In domain	+	0.9911	+	0.8516	-	0.4548	+	0.6571	Mitochondria	0.8113	+	0.5523	+	0.9583	+	0.9877	-	0.7800	-	0.9000	-	0.6479	-	0.8023	-	0.7778	+	0.5800	-	0.8382	-	0.7720	-
qinghao_002	1alpha-Aldehyde-2beta-[3-butanone]-3alpha-methyl-6beta-[2-propanoic acid]-cyclohexane	C[C@H]([C@@H]1CC[C@@H](C)[C@H](CCC(=O)C)[C@H]1C=O)C(=O)O	Qinghao	268.349	Book: Chemical Components of Source Plants in Traditional Chinese Medicine (ISBN: 9787030235534)	250	U.S. Patent Application No. 15/573,583.	1e-06	0.4143	0.162378	N/A	2.55	3	1	6	In domain	+	0.9564	+	0.7910	+	0.8353	-	0.5857	Mitochondria	0.8818	-	0.8541	+	0.8668	+	0.9483	-	0.9800	-	0.7500	-	0.7872	-	0.9045	-	0.8339	-	0.5381	-	0.5320	-	0.8752	-
banxia_013	3-Methyl eicosane	CCCCCCCCCCCCCCCCC[C@@H](C)CC	Banxia	296.574	Book: Chemical Components of Source Plants in Traditional Chinese Medicine (ISBN: 9787030235534)	250	U.S. Patent Application No. 15/573,583.	1e-06	0.4571	0.162102	N/A	8.29	0	0	17	In domain	+	0.9588	+	0.8719	+	1.0000	-	0.5429	Lysosomes	0.5432	-	0.8484	+	0.9467	+	0.9471	-	0.9000	-	0.8250	-	0.5198	-	0.8876	-	0.8559	-	0.7008	-	0.8153	-	0.7243	-
MOL000432	linolenic acid	CC\C=C/C\C=C/C\C=C/CCCCCCCC(=O)O	Banxia	278.43	Database: TCMSP (http://tcmspnw.com)	250	U.S. Patent Application No. 15/573,583.	1e-06	0.4286	0.1619	N/A	5.66	1	1	13	In domain	+	0.9087	+	0.6071	+	0.9620	-	0.5714	Plasma membrane	0.5044	-	0.8530	-	0.4580	-	0.3406	-	0.9600	-	0.9500	+	0.5594	-	0.8342	-	0.9574	-	0.6597	+	0.6276	-	0.8766	-
MOL000467	Castanin	COc1ccc(cc1)C2=COc3cc(O)c(OC)cc3C2=O	Gancao	298.29	Database: TCMSP (http://tcmspnw.com)	167	U.S. Patent Application No. 15/573,583.	1e-06	0.6857	0.161504	N/A	3.18	5	1	3	In domain	+	0.9911	+	0.9277	-	0.3348	+	0.6857	Mitochondria	0.7878	-	0.7194	+	0.9621	+	0.9891	-	0.7800	-	0.9750	-	0.7177	+	0.6318	-	0.9361	+	0.5671	-	0.8382	-	0.7720	+
MOL004647	TDA	CCCCCCCCCCCCC(=O)O	Renshen	214.344	Database: TCMSP (http://tcmspnw.com)	250	U.S. Patent Application No. 15/573,583.	1e-06	0.3286	0.161238	N/A	4.38	1	1	11	In domain	+	0.8417	+	0.7709	+	0.9725	-	0.6714	Mitochondria	0.5152	-	0.8467	+	0.8902	-	0.3662	-	1.0000	-	0.9250	-	0.7311	-	0.9623	-	0.9647	-	0.7568	+	0.6720	-	0.8901	-
qinghao_061	alpha-Epoxy-dihydroartemisinic acid	C[C@H]([C@@H]1CC[C@@H](C)[C@@H]2CC[C@@]3(C)O[C@H]3[C@H]12)C(=O)O	Qinghao	252.349	Book: Chemical Components of Source Plants in Traditional Chinese Medicine (ISBN: 9787030235534)	250	U.S. Patent Application No. 15/573,583.	1e-06	0.3857	0.160753	N/A	2.94	2	1	2	In domain	+	0.9280	+	0.7825	+	0.9425	-	0.6143	Mitochondria	0.4814	-	0.8520	+	0.9153	+	0.9488	-	1.0000	-	0.5750	-	0.9341	-	0.9172	-	0.8567	+	0.5559	+	0.6276	-	0.8576	-
MOL001739	zoomaric acid	CCCCCC\C=C/CCCCCCCC(=O)O	Banxia	254.408	Database: TCMSP (http://tcmspnw.com)	250	U.S. Patent Application No. 15/573,583.	1e-06	0.3857	0.159452	N/A	5.33	1	1	13	In domain	+	0.9087	+	0.7838	+	0.9646	-	0.6143	Plasma membrane	0.5465	-	0.8491	-	0.3622	-	0.5698	-	0.9600	-	0.9000	-	0.4940	-	0.9152	-	0.9649	-	0.6902	+	0.6276	-	0.8766	-
MOL001312	9-HEXADECENOIC ACID	CCCCCC\C=C\CCCCCCCC(=O)O	Renshen	254.408	Database: TCMSP (http://tcmspnw.com)	250	U.S. Patent Application No. 15/573,583.	1e-06	0.3857	0.159452	N/A	5.33	1	1	13	In domain	+	0.9087	+	0.7838	+	0.9646	-	0.6143	Plasma membrane	0.5465	-	0.8491	-	0.3622	-	0.5698	-	0.9600	-	0.9000	-	0.4940	-	0.9152	-	0.9649	-	0.6902	+	0.6276	-	0.8766	-
qinghao_115	Quercetin	OC1=C(Oc2cc(O)cc(O)c2C1=O)c3ccc(O)c(O)c3	Qinghao	302.236	Book: Chemical Components of Source Plants in Traditional Chinese Medicine (ISBN: 9787030235534)	250	U.S. Patent Application No. 15/573,583.	1e-06	0.4571	0.159066	N/A	1.99	7	5	1	In domain	+	0.9833	-	0.6417	-	0.4632	-	0.5429	Mitochondria	0.5892	+	1.0000	+	0.8827	+	0.9480	+	0.6600	-	0.9750	-	0.7052	-	0.9191	-	0.8360	+	0.5564	-	1.0000	-	0.8553	+
MOL006603	(E)-1-(2,6-dihydroxyphenyl)-3-(4-hydroxyphenyl)prop-2-en-1-one	Oc1ccc(\C=C\C(=O)c2c(O)cccc2O)cc1	Kushen	256.253	Database: TCMSP (http://tcmspnw.com)	250	U.S. Patent Application No. 15/573,583.	1e-06	0.3857	0.158304	N/A	2.70	4	3	3	In domain	+	0.9803	+	0.8338	-	0.6924	-	0.6143	Mitochondria	0.7711	-	0.6924	+	0.9536	+	0.9480	-	0.7800	-	0.9838	-	0.5906	-	0.9339	-	0.9470	-	0.6429	-	0.6211	-	0.8534	+
qinghao_090	Luteolin	Oc1cc(O)c2C(=O)C=C(Oc2c1)c3ccc(O)c(O)c3	Qinghao	286.236	Book: Chemical Components of Source Plants in Traditional Chinese Medicine (ISBN: 9787030235534)	250	U.S. Patent Application No. 15/573,583.	1e-06	0.4286	0.157485	N/A	2.28	6	4	1	In domain	+	0.9833	+	0.7457	-	0.4632	-	0.5714	Mitochondria	0.5892	+	0.5053	+	0.9662	+	0.9480	+	0.6600	-	0.9750	-	0.8342	-	0.9249	-	0.9343	-	0.5353	-	1.0000	-	0.8553	+
qinghao_116	Quercetin-3-methyl ether	COC1=C(Oc2cc(O)cc(O)c2C1=O)c3ccc(O)c(O)c3	Qinghao	316.262	Book: Chemical Components of Source Plants in Traditional Chinese Medicine (ISBN: 9787030235534)	250	U.S. Patent Application No. 15/573,583.	1e-06	0.4714	0.156766	N/A	2.29	7	4	2	In domain	+	0.9840	+	0.5751	-	0.3891	-	0.5286	Mitochondria	0.6297	+	0.5846	+	0.9444	+	0.9904	+	0.5400	-	0.9250	-	0.6302	-	0.7092	-	0.8650	+	0.5593	-	0.6887	-	0.8370	+
renshen_136	alpha-Santalol	C\C(=C\CC[C@@]1(C)C2C[C@@H]3[C@H](C2)C13C)\CO	Renshen	220.35	Book: Chemical Components of Source Plants in Traditional Chinese Medicine (ISBN: 9787030235534)	167	U.S. Patent Application No. 15/573,583.	1e-06	0.4857	0.154861	N/A	3.39	1	1	4	In domain	+	0.9855	+	0.8303	+	0.9647	-	0.5143	Lysosomes	0.7886	-	0.8505	+	0.9162	+	0.8460	-	0.8800	-	0.6500	-	0.7248	-	0.9523	-	0.7708	+	0.5530	-	0.7731	-	0.7499	-
kushen_019	Kosamol S	CC(=CCc1c(O)cc(O)c2C(=O)C[C@H](Oc12)c3ccccc3O)C	Kushen	340.37	Book: Chemical Components of Source Plants in Traditional Chinese Medicine (ISBN: 9787030235534)	250	U.S. Patent Application No. 15/573,583.	1e-06	0.5	0.1545	N/A	4.02	5	3	3	In domain	+	0.9942	+	0.6567	-	0.4500	-	0.5000	Mitochondria	0.7746	-	0.5835	+	0.8733	+	0.9575	-	0.9600	-	0.9000	-	0.5000	-	0.6266	-	0.7899	+	0.5439	-	0.7977	-	0.7912	+
renshen_081	Heptadecane	CCCCCCCCCCCCCCCCC	Renshen	240.468	Book: Chemical Components of Source Plants in Traditional Chinese Medicine (ISBN: 9787030235534)	167	U.S. Patent Application No. 15/573,583.	1e-06	0.5286	0.154439	N/A	6.88	0	0	14	In domain	+	0.8865	+	0.9619	+	1.0000	+	0.5286	Lysosomes	0.5981	-	0.8472	+	0.9552	+	0.9429	-	0.9600	-	0.8000	-	0.7047	-	0.9285	-	0.9516	-	0.7947	-	0.8415	-	0.7215	-
qinghao_108	Phytene-1,2-diol	CC(C)CCC[C@H](C)CCC[C@H](C)CCCC(=C)[C@H](O)CO	Qinghao	312.53	Book: Chemical Components of Source Plants in Traditional Chinese Medicine (ISBN: 9787030235534)	250	U.S. Patent Application No. 15/573,583.	1e-06	0.4571	0.153826	N/A	5.33	2	2	14	In domain	+	0.9410	+	0.4914	+	0.9570	-	0.5429	Mitochondria	0.5235	-	0.8519	+	0.9587	+	0.9581	-	1.0000	-	0.7250	-	0.7432	-	0.8830	-	0.8156	-	0.6080	-	0.8189	-	0.7580	-
qinghao_043	Cirsilineol	COc1cc(ccc1O)C2=CC(=O)c3c(O)c(OC)c(OC)cc3O2	Qinghao	344.315	Book: Chemical Components of Source Plants in Traditional Chinese Medicine (ISBN: 9787030235534)	250	U.S. Patent Application No. 15/573,583.	1e-06	0.5	0.15273	N/A	2.90	7	2	4	In domain	+	0.9889	+	0.7867	-	0.4399	-	0.5000	Mitochondria	0.7936	-	0.7148	+	0.9300	+	0.9480	+	0.5400	-	0.9500	-	0.7057	+	0.6802	-	0.8405	+	0.5245	-	0.6401	-	0.8296	-
maidong_007	5,7-Dihydroxy-6,8-dimethyl-3-(4'-hydroxy-3'-methoxybenzyl)chroman-4-one	COc1cc(C[C@@H]2COc3c(C)c(O)c(C)c(O)c3C2=O)ccc1O	Maidong	344.358	Book: Chemical Components of Source Plants in Traditional Chinese Medicine (ISBN: 9787030235534)	250	U.S. Patent Application No. 15/573,583.	1e-06	0.5	0.152711	N/A	2.86	6	3	3	In domain	+	0.9956	+	0.6703	-	0.5072	-	0.5000	Mitochondria	0.6101	-	0.5780	+	0.9032	-	0.3368	-	0.8800	-	0.9250	-	0.6172	-	0.7959	-	0.6942	+	0.5689	+	0.5969	-	0.7779	-
zhishi_007	N-Methyltyramine	CNCCc1ccc(O)cc1	Zhishi	151.206	Book: Chemical Components of Source Plants in Traditional Chinese Medicine (ISBN: 9787030235534)	167	U.S. Patent Application No. 15/573,583.	1e-06	0.3286	0.152682	N/A	1.15	2	2	3	In domain	+	0.9788	+	0.9249	+	0.8781	-	0.6714	Lysosomes	0.5578	-	0.8697	+	0.8755	+	0.9505	-	0.9400	-	0.6500	-	0.9545	-	0.9789	-	0.5658	-	0.6285	-	0.6131	+	0.6683	-
changshan_003	4-Hydroxyhydrangenol	Oc1ccc(cc1)[C@@H]2Cc3cccc(O)c3C(=O)O2	Changshan	256.253	Book: Chemical Components of Source Plants in Traditional Chinese Medicine (ISBN: 9787030235534)	250	U.S. Patent Application No. 15/573,583.	1e-06	0.3714	0.152434	N/A	2.55	4	2	1	In domain	+	0.9947	-	0.6905	-	0.7918	-	0.6286	Mitochondria	0.7997	-	0.7441	+	0.8875	+	0.9662	-	0.8400	-	0.9750	-	0.8263	-	0.9303	-	0.9242	-	0.5059	-	0.5266	-	0.8254	-
renshen_032	delta-EIemene	CC(C)C1=C[C@H](C(=C)C)[C@@](C)(CC1)C=C	Renshen	204.351	Book: Chemical Components of Source Plants in Traditional Chinese Medicine (ISBN: 9787030235534)	167	U.S. Patent Application No. 15/573,583.	1e-06	0.4429	0.152271	N/A	4.75	0	0	3	In domain	+	0.9772	+	0.7309	+	0.9950	-	0.5571	Lysosomes	0.6482	-	0.8579	+	0.9298	-	0.3738	-	0.8800	-	0.7500	-	0.9080	-	0.9119	-	0.8465	-	0.5000	-	0.7977	-	0.7640	-
renshen_138	alpha-Selinene	CC(=C)[C@@H]1CC[C@@]2(C)CCC=C(C)[C@@H]2C1	Renshen	204.351	Book: Chemical Components of Source Plants in Traditional Chinese Medicine (ISBN: 9787030235534)	167	U.S. Patent Application No. 15/573,583.	1e-06	0.4429	0.152271	N/A	4.73	0	0	1	In domain	+	0.9828	+	0.8632	+	0.9897	-	0.5571	Lysosomes	0.7525	-	0.8472	+	0.9547	+	0.8939	-	0.9000	-	0.6500	-	0.8158	-	0.9536	-	0.8131	+	0.5282	-	0.7731	-	0.7252	-
qinghao_117	Rhamnetin	COc1cc(O)c2C(=O)C(=C(Oc2c1)c3ccc(O)c(O)c3)O	Qinghao	316.262	Book: Chemical Components of Source Plants in Traditional Chinese Medicine (ISBN: 9787030235534)	250	U.S. Patent Application No. 15/573,583.	1e-06	0.4571	0.152011	N/A	2.29	7	4	2	In domain	+	0.9840	-	0.5144	-	0.4167	-	0.5429	Mitochondria	0.7944	-	0.5175	+	0.9414	+	0.9965	+	0.5400	-	0.9000	-	0.6704	-	0.7052	-	0.8591	+	0.5784	-	0.6887	-	0.8370	-
MOL006963	Ethyl linolelaidate	CCCCC\C=C\C\C=C\CCCCCCCC(=O)OCC	Banxia	308.499	Database: TCMSP (http://tcmspnw.com)	250	U.S. Patent Application No. 15/573,583.	1e-06	0.4429	0.150995	N/A	6.36	2	0	15	In domain	+	0.9567	+	0.8051	+	1.0000	-	0.5571	Plasma membrane	0.4591	-	0.8510	-	0.3208	+	0.8915	-	0.9000	-	0.8500	+	0.7978	-	0.7122	-	0.9651	-	0.5285	-	1.0000	-	0.8696	-
MOL004964	(Z)-1-(2,4-dihydroxyphenyl)-3-phenylprop-2-en-1-one	Oc1ccc(C(=O)\C=C/c2ccccc2)c(O)c1	Gancao	240.254	Database: TCMSP (http://tcmspnw.com)	167	U.S. Patent Application No. 15/573,583.	1e-06	0.5143	0.150395	N/A	2.99	3	2	3	In domain	+	0.9803	+	0.8183	-	0.8651	+	0.5143	Mitochondria	0.7898	-	0.7204	+	0.9353	+	0.9441	-	0.7800	-	0.9588	-	0.6903	-	0.9385	-	0.9582	-	0.6934	-	0.6211	-	0.8534	+
qinghao_039	Chrysoeriol	COc1cc(ccc1O)C2=CC(=O)c3c(O)cc(O)cc3O2	Qinghao	300.263	Book: Chemical Components of Source Plants in Traditional Chinese Medicine (ISBN: 9787030235534)	250	U.S. Patent Application No. 15/573,583.	1e-06	0.4286	0.150128	N/A	2.59	6	3	2	In domain	+	0.9889	+	0.7795	-	0.4148	-	0.5714	Mitochondria	0.6494	-	0.5487	+	0.9394	+	0.9480	+	0.5400	-	0.9250	-	0.7253	-	0.7006	-	0.8643	+	0.5159	-	0.6401	-	0.8296	+
banxia_002	Bis(4-hydroxybenzyl)ether	Oc1ccc(COCc2ccc(O)cc2)cc1	Banxia	230.259	Book: Chemical Components of Source Plants in Traditional Chinese Medicine (ISBN: 9787030235534)	250	U.S. Patent Application No. 15/573,583.	1e-06	0.3286	0.150093	N/A	2.81	3	2	4	In domain	+	0.9860	+	0.9161	+	0.8698	-	0.6714	Mitochondria	0.9102	-	0.8575	+	0.9030	+	0.8668	-	0.9200	-	0.6500	-	0.8063	-	0.8591	-	0.9748	-	0.7404	-	0.7945	+	0.3569	-
MOL000924	Mnk	CCCCCCCCCC(=O)C	Banxia	170.292	Database: TCMSP (http://tcmspnw.com)	250	U.S. Patent Application No. 15/573,583.	1e-06	0.2429	0.150018	N/A	3.72	1	0	8	In domain	+	0.9508	+	0.9454	+	1.0000	-	0.7571	Mitochondria	0.4585	-	0.8421	+	0.9426	+	0.9431	-	1.0000	-	0.8750	-	0.7770	-	0.9599	-	0.9317	-	0.7276	-	1.0000	-	0.7622	-
MOL000749	Linoleic	CCCCC\C=C\C\C=C\CCCCCCCC(=O)O	Renshen	280.445	Database: TCMSP (http://tcmspnw.com)	250	U.S. Patent Application No. 15/573,583.	1e-06	0.4	0.150011	N/A	5.88	1	1	14	In domain	+	0.9087	+	0.6201	+	0.9646	-	0.6000	Plasma membrane	0.5465	-	0.8511	-	0.6267	-	0.5698	-	0.9600	-	0.9000	-	0.5686	-	0.8702	-	0.9531	-	0.6641	+	0.6276	-	0.8766	-
gancao_010	Formononetin	COc1ccc(cc1)C2=COc3cc(O)ccc3C2=O	Gancao	268.264	Book: Chemical Components of Source Plants in Traditional Chinese Medicine (ISBN: 9787030235534)	167	U.S. Patent Application No. 15/573,583.	1e-06	0.5714	0.149646	N/A	3.17	4	1	2	In domain	+	0.9911	+	0.9313	-	0.3715	+	0.5714	Mitochondria	0.8197	-	0.5884	+	0.9459	+	0.9964	-	0.7800	-	0.9250	-	0.7152	-	0.7771	-	0.8976	+	0.5699	-	0.8382	-	0.7720	+
MOL007447	2-(3,5-dihydroxy-4-methoxy-phenyl)-3,5,7-trihydroxy-chromone	COc1c(O)cc(cc1O)C2=C(O)C(=O)c3c(O)cc(O)cc3O2	Qinghao	332.262	Database: TCMSP (http://tcmspnw.com)	250	U.S. Patent Application No. 15/573,583.	1e-06	0.4714	0.149218	N/A	2.00	8	5	2	In domain	+	0.9889	+	0.8412	-	0.4148	-	0.5286	Mitochondria	0.6494	-	0.5298	+	0.8283	+	0.9480	+	0.5400	-	0.9250	-	0.8756	-	0.8246	-	0.7586	+	0.5625	-	0.6401	-	0.8296	+
qinghao_098	Norannuic acid formyl ester	C[C@@H]1CC[C@@H]([C@@H]2[C@H]1CCC(=C)[C@H]2OC=O)C(=O)O	Qinghao	252.306	Book: Chemical Components of Source Plants in Traditional Chinese Medicine (ISBN: 9787030235534)	250	U.S. Patent Application No. 15/573,583.	1e-06	0.3571	0.148858	N/A	2.24	3	1	3	In domain	+	0.9779	+	0.5486	-	0.5000	-	0.6429	Mitochondria	0.8375	-	0.8557	+	0.9293	+	0.8740	-	1.0000	-	0.7571	-	0.9608	-	0.9612	-	0.8754	+	0.5589	+	0.6346	-	0.8777	-
maidong_038	2,5,7-Trihydroxy-6,8-dimethyl-3-(4’-methoxybenzyl)chroman-4-one	COc1ccc(C[C@@H]2[C@@H](O)Oc3c(C)c(O)c(C)c(O)c3C2=O)cc1	Maidong	344.358	Book: Chemical Components of Source Plants in Traditional Chinese Medicine (ISBN: 9787030235534)	250	U.S. Patent Application No. 15/573,583.	1e-06	0.4857	0.148343	N/A	2.48	6	3	3	In domain	+	0.9884	+	0.5576	-	0.6038	-	0.5143	Mitochondria	0.6791	-	0.5809	+	0.8138	-	0.2923	-	0.8800	-	0.9250	-	0.7792	-	0.6782	-	0.8424	+	0.5746	+	0.5976	-	0.8064	-
MOL000971	Ethylpalmitate	CCCCCCCCCCCCCCCC(=O)OCC	Banxia	284.477	Database: TCMSP (http://tcmspnw.com)	250	U.S. Patent Application No. 15/573,583.	1e-06	0.4	0.147885	N/A	6.03	2	0	15	In domain	+	0.9543	+	0.8633	+	1.0000	-	0.6000	Mitochondria	0.6090	-	0.8450	+	0.9391	+	0.9171	-	0.8800	-	0.8500	+	0.6438	-	0.8526	-	0.9783	-	0.6060	-	0.7977	-	0.8679	-
renshen_117	alpha-Panasinsene	CC1=CCC[C@@]2(C)CC[C@H]3C(C)(C)C[C@@]123	Renshen	204.351	Book: Chemical Components of Source Plants in Traditional Chinese Medicine (ISBN: 9787030235534)	167	U.S. Patent Application No. 15/573,583.	1e-06	0.4286	0.147354	N/A	4.56	0	0	0	In domain	+	0.9762	+	0.9141	+	0.9882	-	0.5714	Lysosomes	0.7345	-	0.8405	+	0.9518	+	0.9505	-	0.9400	-	0.6750	-	0.8912	-	0.9405	-	0.9296	-	0.5115	-	0.5969	-	0.7431	-
renshen_034	beta-Farnesene	CC(=CCC\C(=C\CCC(=C)C=C)\C)C	Renshen	204.351	Book: Chemical Components of Source Plants in Traditional Chinese Medicine (ISBN: 9787030235534)	167	U.S. Patent Application No. 15/573,583.	1e-06	0.4286	0.147354	N/A	5.20	0	0	7	In domain	+	0.9698	+	0.8952	+	0.9962	-	0.5714	Nucleus	0.6326	-	0.8545	+	0.9330	+	0.9322	-	0.9600	-	0.8000	-	0.6943	-	0.9495	-	0.9484	-	0.6041	-	0.8209	-	0.7550	-
MOL006638	Pterocarpine	COc1ccc2[C@@H]3Oc4cc5OCOc5cc4[C@@H]3COc2c1	Kushen	298.29	Database: TCMSP (http://tcmspnw.com)	250	U.S. Patent Application No. 15/573,583.	1e-06	0.4143	0.146079	N/A	3.03	5	0	1	In domain	+	0.9906	+	0.7578	+	0.9282	-	0.5857	Mitochondria	0.6093	-	1.0000	+	0.9311	+	0.9838	-	0.8200	-	0.9500	+	0.7534	-	0.4935	-	0.8505	+	0.5151	-	0.8202	+	0.3802	+
qinghao_055	3, 4-Dihydroxy-6, 7, 3’, 4’-tetramethoxyflavonol	COc1ccc(cc1OC)C2=C(O)[C@@H](O)c3cc(OC)c(OC)cc3O2	Qinghao	360.358	Book: Chemical Components of Source Plants in Traditional Chinese Medicine (ISBN: 9787030235534)	250	U.S. Patent Application No. 15/573,583.	1e-06	0.5	0.145931	N/A	3.07	7	2	5	In domain	+	0.9924	+	0.8266	-	0.3355	-	0.5000	Mitochondria	0.6175	-	0.8631	+	0.9222	+	0.9878	-	0.9200	-	0.9000	+	0.6576	+	0.6843	-	0.8524	+	0.5282	-	0.6104	-	0.6704	-
MOL004957	HMO	COc1ccc2C(=O)C(=COc2c1)c3ccc(O)cc3	Gancao	268.264	Database: TCMSP (http://tcmspnw.com)	167	U.S. Patent Application No. 15/573,583.	1e-06	0.5571	0.145901	N/A	3.17	4	1	2	In domain	+	0.9911	+	0.9525	-	0.3715	+	0.5571	Mitochondria	0.8197	-	0.5861	+	0.9524	+	0.9964	-	0.7800	-	0.9250	-	0.5663	-	0.6216	-	0.9221	+	0.5693	-	0.8382	-	0.7720	+
renshen_027	2,6-Ditertbutyl-4-methyl phenol	Cc1cc(c(O)c(c1)C(C)(C)C)C(C)(C)C	Renshen	220.35	Book: Chemical Components of Source Plants in Traditional Chinese Medicine (ISBN: 9787030235534)	167	U.S. Patent Application No. 15/573,583.	1e-06	0.4571	0.145742	N/A	4.30	1	1	0	In domain	+	0.9928	+	0.6677	+	0.9946	-	0.5429	Mitochondria	0.8267	-	0.8659	+	0.9342	+	0.9718	-	1.0000	-	0.9250	-	0.9015	-	0.9387	-	0.9826	-	0.7199	-	0.7461	-	0.6869	-
MOL006957	(3S,6S)-3-(benzyl)-6-(4-hydroxybenzyl)piperazine-2,5-quinone	Oc1ccc(C[C@@H]2NC(=O)[C@H](Cc3ccccc3)NC2=O)cc1	Banxia	310.347	Database: TCMSP (http://tcmspnw.com)	250	U.S. Patent Application No. 15/573,583.	1e-06	0.4286	0.14525	N/A	1.16	3	3	4	In domain	+	0.9663	+	0.5643	+	0.9628	-	0.5714	Mitochondria	0.7869	-	1.0000	+	0.8901	+	0.9471	-	0.8400	-	0.9034	+	0.5664	-	0.8238	-	0.8096	-	0.6205	-	0.8120	-	0.7874	-
MOL000879	methyl palmitate	CCCCCCCCCCCCCCCC(=O)OC	Renshen	270.451	Database: TCMSP (http://tcmspnw.com)	250	U.S. Patent Application No. 15/573,583.	1e-06	0.3714	0.144432	N/A	5.64	2	0	14	In domain	+	0.9543	+	0.8803	+	1.0000	-	0.6286	Mitochondria	0.4276	-	0.8478	+	0.9344	+	0.8973	-	0.8800	-	0.8750	+	0.5804	-	0.8550	-	0.9116	-	0.6618	-	0.7977	-	0.8679	-
MOL000676	DBP	CCCCOC(=O)c1ccccc1C(=O)OCCCC	Gancao	278.343	Database: TCMSP (http://tcmspnw.com)	167	U.S. Patent Application No. 15/573,583.	1e-06	0.5714	0.144227	N/A	3.60	4	0	8	In domain	+	1.0000	+	0.9515	+	0.9831	+	0.5714	Mitochondria	0.8874	-	1.0000	+	0.9413	+	0.9563	-	1.0000	-	0.8500	-	0.7571	-	0.7061	-	0.9572	-	0.6311	-	0.8046	-	0.8123	-
MOL000675	oleic acid	CCCCCCCC\C=C/CCCCCCCC(=O)O	Banxia	282.461	Database: TCMSP (http://tcmspnw.com)	250	U.S. Patent Application No. 15/573,583.	1e-06	0.3857	0.143616	N/A	6.11	1	1	15	In domain	+	0.9087	+	0.7127	+	0.9646	-	0.6143	Plasma membrane	0.5465	-	0.8485	-	0.3622	-	0.5698	-	0.9600	-	0.9000	-	0.7390	-	0.8821	-	0.9649	-	0.6902	+	0.6276	-	0.8766	-
MOL006944	8-Octadecenoic acid	CCCCCCCCC\C=C\CCCCCCC(=O)O	Banxia	282.461	Database: TCMSP (http://tcmspnw.com)	250	U.S. Patent Application No. 15/573,583.	1e-06	0.3857	0.143616	N/A	6.11	1	1	15	In domain	+	0.9087	+	0.7510	+	0.9646	-	0.6143	Plasma membrane	0.5465	-	0.8489	-	0.3622	-	0.5698	-	0.9600	-	0.9000	-	0.6272	-	0.8727	-	0.9649	-	0.6902	+	0.6276	-	0.8766	-
MOL004991	7-Acetoxy-2-methylisoflavone	CC(=O)Oc1ccc2C(=O)C(=C(C)Oc2c1)c3ccccc3	Gancao	294.301	Database: TCMSP (http://tcmspnw.com)	167	U.S. Patent Application No. 15/573,583.	1e-06	0.6	0.143234	N/A	3.69	4	0	2	In domain	+	0.9824	+	0.5834	-	0.4112	+	0.6000	Mitochondria	0.6783	-	0.8650	+	0.9596	+	0.9827	-	0.9400	-	0.9750	+	0.7112	+	0.6458	-	0.9108	+	0.5445	-	0.6012	-	0.8980	-
qinghao_074	1beta Hydroxy-4(15),5-eudesmadiene	CC(C)[C@@H]1CC[C@@]2(C)[C@H](O)CCC(=C)C2=C1	Qinghao	220.35	Book: Chemical Components of Source Plants in Traditional Chinese Medicine (ISBN: 9787030235534)	250	U.S. Patent Application No. 15/573,583.	1e-06	0.3	0.143192	N/A	3.70	1	1	1	In domain	+	0.9964	+	0.7568	+	0.8403	-	0.7000	Mitochondria	0.4915	-	0.8521	+	0.9121	+	0.8814	-	1.0000	-	0.6250	-	0.7928	-	0.9104	-	0.8658	+	0.5247	-	1.0000	-	0.7337	-
MOL005384	suchilactone	COc1ccc(C[C@H]2COC(=O)/C/2=C\c3ccc4OCOc4c3)cc1OC	Renshen	368.38	Database: TCMSP (http://tcmspnw.com)	250	U.S. Patent Application No. 15/573,583.	1e-06	0.5	0.142753	N/A	3.23	6	0	5	In domain	+	0.9908	+	0.7793	+	0.9299	-	0.5000	Mitochondria	0.7603	-	1.0000	+	0.9216	+	0.9630	-	0.8400	-	1.0000	+	0.9338	+	0.8449	-	0.7060	+	0.5932	-	1.0000	-	0.7972	+
MOL001396	PENTADECYLIC ACID	CCCCCCCCCCCCCCC(=O)O	Banxia	242.398	Database: TCMSP (http://tcmspnw.com)	250	U.S. Patent Application No. 15/573,583.	1e-06	0.3286	0.142577	N/A	5.16	1	1	13	In domain	+	0.8417	+	0.7422	+	0.9725	-	0.6714	Mitochondria	0.5152	-	0.8478	+	0.8902	-	0.3662	-	1.0000	-	0.9250	-	0.6687	-	0.9482	-	0.9647	-	0.7568	+	0.6720	-	0.8901	-
MOL001396	PENTADECYLIC ACID	CCCCCCCCCCCCCCC(=O)O	Renshen	242.398	Database: TCMSP (http://tcmspnw.com)	250	U.S. Patent Application No. 15/573,583.	1e-06	0.3286	0.142577	N/A	5.16	1	1	13	In domain	+	0.8417	+	0.7422	+	0.9725	-	0.6714	Mitochondria	0.5152	-	0.8478	+	0.8902	-	0.3662	-	1.0000	-	0.9250	-	0.6687	-	0.9482	-	0.9647	-	0.7568	+	0.6720	-	0.8901	-
maidong_009	5-Hydroxy-7,8-dimethoxy-6-methyl-3-(3’,4’-dihydroxybenzyl) chroman-4-one	COc1c(C)c(O)c2C(=O)[C@H](Cc3ccc(O)c(O)c3)COc2c1OC	Maidong	360.358	Book: Chemical Components of Source Plants in Traditional Chinese Medicine (ISBN: 9787030235534)	250	U.S. Patent Application No. 15/573,583.	1e-06	0.4857	0.141757	N/A	2.56	7	3	4	In domain	+	0.9928	+	0.5835	-	0.6321	-	0.5143	Mitochondria	0.7567	-	0.7203	+	0.9291	+	0.9112	-	0.8400	-	0.9250	-	0.6684	-	0.7517	-	0.7574	+	0.5538	+	0.5973	-	0.7903	-
MOL006600	1-[2,4-dihydroxy-3-(3-methylbut-2-enyl)phenyl]-3-phenylprop-2-en-1-one	CC(=CCc1c(O)ccc(C(=O)\C=C\c2ccccc2)c1O)C	Kushen	308.371	Database: TCMSP (http://tcmspnw.com)	250	U.S. Patent Application No. 15/573,583.	1e-06	0.4143	0.141303	N/A	4.50	3	2	5	In domain	+	0.9875	+	0.5780	-	0.3185	-	0.5857	Mitochondria	0.8425	-	0.5788	+	0.8859	+	0.9435	-	0.8800	-	0.9588	+	0.8515	-	0.5299	-	0.8934	-	0.5984	-	0.7861	-	0.8509	+
MOL004941	(2R)-7-hydroxy-2-(4-hydroxyphenyl)chroman-4-one	Oc1ccc(cc1)[C@H]2CC(=O)c3ccc(O)cc3O2	Kushen	256.253	Database: TCMSP (http://tcmspnw.com)	250	U.S. Patent Application No. 15/573,583.	1e-06	0.3429	0.140737	N/A	2.80	4	2	1	In domain	+	0.9947	-	0.7591	-	0.6880	-	0.6571	Mitochondria	0.8241	-	0.6348	+	0.8593	+	0.9756	-	0.9800	-	0.9500	-	0.8490	-	0.9166	-	0.9037	-	0.5451	-	1.0000	+	0.3531	+
MOL000787	Fumarine	CN1CCc2cc3OCOc3cc2C(=O)Cc4ccc5OCOc5c4C1	Renshen	353.369	Database: TCMSP (http://tcmspnw.com)	250	U.S. Patent Application No. 15/573,583.	1e-06	0.4714	0.140305	N/A	2.56	6	0	0	In domain	+	0.9874	+	0.8102	+	0.9913	-	0.5286	Lysosomes	0.5341	-	1.0000	+	0.9274	+	0.9506	-	0.9000	-	0.6000	+	0.8151	-	0.4610	-	0.7533	+	0.5208	-	0.8236	+	0.3945	-
huanglian_002	3-Carboxy-4-hydroxy-phenoxy glucoside	OC[C@H]1O[C@@H](Oc2ccc(O)c(c2)C(=O)O)[C@H](O)[C@@H](O)[C@@H]1O	Huanglian	316.261	Book: Chemical Components of Source Plants in Traditional Chinese Medicine (ISBN: 9787030235534)	334	U.S. Patent Application No. 15/573,583.	1e-06	0.3143	0.139642	N/A	-1.73	8	6	4	In domain	-	0.5266	-	0.8912	-	0.5362	-	0.6857	Mitochondria	0.6547	-	1.0000	+	0.9424	+	0.9117	-	0.7200	-	0.8000	-	0.9420	-	0.9437	-	0.9825	-	0.6098	-	1.0000	-	0.8824	-
qinghao_106	Penduletin	COC1=C(Oc2cc(OC)c(OC)c(O)c2C1=O)c3ccc(O)cc3	Qinghao	344.315	Book: Chemical Components of Source Plants in Traditional Chinese Medicine (ISBN: 9787030235534)	250	U.S. Patent Application No. 15/573,583.	1e-06	0.4571	0.139626	N/A	2.90	7	2	4	In domain	+	0.9889	+	0.6034	-	0.4399	-	0.5429	Mitochondria	0.7936	-	0.5762	+	0.9099	+	0.9480	+	0.5400	-	0.9500	+	0.5780	+	0.7691	-	0.7214	+	0.5496	-	0.6401	-	0.8296	-
kushen_049	Leachianone G	CC(=CCc1c(O)cc(O)c2C(=O)C[C@H](Oc12)c3ccc(O)cc3O)C	Kushen	356.369	Book: Chemical Components of Source Plants in Traditional Chinese Medicine (ISBN: 9787030235534)	250	U.S. Patent Application No. 15/573,583.	1e-06	0.4714	0.139123	N/A	3.72	6	4	3	In domain	+	0.9942	+	0.8275	-	0.4500	-	0.5286	Mitochondria	0.7746	-	0.5773	+	0.8695	+	0.9575	-	0.9600	-	0.9000	+	0.5552	-	0.6777	-	0.5800	+	0.5742	-	0.7977	-	0.7912	+
MOL006626	leachianone,g	CC(=CCc1c(O)cc(O)c2C(=O)C[C@@H](Oc12)c3ccc(O)cc3O)C	Kushen	356.369	Database: TCMSP (http://tcmspnw.com)	250	U.S. Patent Application No. 15/573,583.	1e-06	0.4714	0.139123	N/A	3.72	6	4	3	In domain	+	0.9942	+	0.8275	-	0.4500	-	0.5286	Mitochondria	0.7746	-	0.5773	+	0.8695	+	0.9575	-	0.9600	-	0.9000	+	0.5552	-	0.6777	-	0.5800	+	0.5742	-	0.7977	-	0.7912	+
zhishi_016	5,7,4'-Trimethoxyflavone	COc1ccc(cc1)C2=CC(=O)c3c(OC)cc(OC)cc3O2	Zhishi	312.317	Book: Chemical Components of Source Plants in Traditional Chinese Medicine (ISBN: 9787030235534)	167	U.S. Patent Application No. 15/573,583.	1e-06	0.6143	0.138189	N/A	3.49	5	0	4	In domain	+	0.9928	+	0.9422	+	0.8475	+	0.6143	Mitochondria	0.6815	-	1.0000	+	0.9419	+	0.9890	-	0.9600	-	0.9750	+	0.5733	+	0.9512	-	0.9237	-	0.5000	-	1.0000	-	0.7654	+
qinghao_085	Isorhamnetin	COc1cc(ccc1O)C2=C(O)C(=O)c3c(O)cc(O)cc3O2	Qinghao	316.262	Book: Chemical Components of Source Plants in Traditional Chinese Medicine (ISBN: 9787030235534)	250	U.S. Patent Application No. 15/573,583.	1e-06	0.4143	0.137778	N/A	2.29	7	4	2	In domain	+	0.9889	-	0.5146	-	0.4148	-	0.5857	Mitochondria	0.6494	-	0.5120	+	0.8825	+	0.9480	+	0.5400	-	0.9250	-	0.5758	-	0.7267	-	0.7507	+	0.5875	-	0.6401	-	0.8296	+
maidong_023	Ophiopogonanone E	COc1ccc(C[C@@H]2COc3c(OC)c(O)c(C)c(O)c3C2=O)c(O)c1	Maidong	360.358	Book: Chemical Components of Source Plants in Traditional Chinese Medicine (ISBN: 9787030235534)	250	U.S. Patent Application No. 15/573,583.	1e-06	0.4714	0.137584	N/A	2.56	7	3	4	In domain	+	0.9956	+	0.5705	-	0.5072	-	0.5286	Mitochondria	0.5825	-	0.7197	+	0.9140	-	0.2965	-	0.8800	-	0.9250	-	0.6665	-	0.7126	-	0.6987	+	0.5725	+	0.5969	-	0.7779	-
MOL005402	Methyl margarate	CCCCCCCCCCCCCCCCC(=O)OC	Renshen	284.477	Database: TCMSP (http://tcmspnw.com)	250	U.S. Patent Application No. 15/573,583.	1e-06	0.3714	0.137311	N/A	6.03	2	0	15	In domain	+	0.9543	+	0.8580	+	1.0000	-	0.6286	Mitochondria	0.4276	-	0.8484	+	0.9344	+	0.8973	-	0.8800	-	0.8750	-	0.4583	-	0.8272	-	0.9116	-	0.6618	-	0.7977	-	0.8679	-
qinghao_086	3,5,7,4'-Tetrahydroxyflavone	OC1=C(Oc2cc(O)cc(O)c2C1=O)c3ccc(O)cc3	Qinghao	286.236	Book: Chemical Components of Source Plants in Traditional Chinese Medicine (ISBN: 9787030235534)	250	U.S. Patent Application No. 15/573,583.	1e-06	0.3714	0.136467	N/A	2.28	6	4	1	In domain	+	0.9881	-	0.8637	-	0.5635	-	0.6286	Mitochondria	0.6122	+	0.5370	+	0.7318	-	0.5697	+	0.6600	-	0.9750	-	0.5434	-	0.8576	-	0.7327	+	0.5231	-	0.6443	-	0.8503	+
kushen_029	Kushenin	COc1cc2[C@@H]3COc4cc(O)ccc4[C@H]3Oc2cc1O	Kushen	286.279	Book: Chemical Components of Source Plants in Traditional Chinese Medicine (ISBN: 9787030235534)	250	U.S. Patent Application No. 15/573,583.	1e-06	0.3714	0.136447	N/A	2.72	5	2	1	In domain	+	0.9961	+	0.6070	+	0.8142	-	0.6286	Mitochondria	0.7867	-	0.8612	+	0.9125	+	0.9782	-	0.9000	-	0.9250	-	0.6832	-	0.8393	-	0.7040	+	0.5506	-	0.7778	+	0.4927	-
MOL006613	kushenin	COc1cc2[C@H]3COc4cc(O)ccc4[C@H]3Oc2cc1O	Kushen	286.279	Database: TCMSP (http://tcmspnw.com)	250	U.S. Patent Application No. 15/573,583.	1e-06	0.3714	0.136447	N/A	2.72	5	2	1	In domain	+	0.9961	+	0.6070	+	0.8142	-	0.6286	Mitochondria	0.7867	-	0.8612	+	0.9125	+	0.9782	-	0.9000	-	0.9250	-	0.6832	-	0.8393	-	0.7040	+	0.5506	-	0.7778	+	0.4927	-
MOL006936	10,13-eicosadienoic	CCCCCC\C=C\C\C=C\CCCCCCCCC(=O)O	Banxia	308.499	Database: TCMSP (http://tcmspnw.com)	250	U.S. Patent Application No. 15/573,583.	1e-06	0.4	0.13637	N/A	6.66	1	1	16	In domain	+	0.9087	+	0.5705	+	0.9646	-	0.6000	Plasma membrane	0.5465	-	0.8524	-	0.6267	-	0.5698	-	0.9600	-	0.9000	+	0.5681	-	0.7691	-	0.9531	-	0.6641	+	0.6276	-	0.8766	-
maidong_040	5,7,2'-Trihydroxy-6-methyl-3-(3',4’-methylenedioxybenzyl) chromone	Cc1c(O)cc2OC=C(Cc3ccc4OCOc4c3O)C(=O)c2c1O	Maidong	342.3	Book: Chemical Components of Source Plants in Traditional Chinese Medicine (ISBN: 9787030235534)	250	U.S. Patent Application No. 15/573,583.	1e-06	0.4429	0.136085	N/A	2.54	7	3	2	In domain	+	0.9716	+	0.5733	-	0.2935	-	0.5571	Mitochondria	0.7167	-	0.5608	+	0.9099	+	0.9254	-	0.7600	-	0.9250	-	0.4833	-	0.6722	-	0.8418	+	0.5291	-	0.5797	-	0.8467	+
MOL006962	2Z-hexadecenoic acid	CCCCCCCCCCCCC\C=C/C(=O)O	Banxia	254.408	Database: TCMSP (http://tcmspnw.com)	250	U.S. Patent Application No. 15/573,583.	1e-06	0.3286	0.135846	N/A	5.33	1	1	13	In domain	+	0.9793	+	0.8289	+	0.9907	-	0.6714	Plasma membrane	0.6894	-	0.8521	+	0.8602	-	0.3061	-	0.9800	-	0.8750	-	0.5256	-	0.9386	-	0.9620	-	0.6861	+	0.6079	-	0.9072	-
renshen_158	Widdrol	C[C@]1(O)CC[C@]2(C)CCCC(C)(C)C2=CC1	Renshen	222.366	Book: Chemical Components of Source Plants in Traditional Chinese Medicine (ISBN: 9787030235534)	167	U.S. Patent Application No. 15/573,583.	1e-06	0.4286	0.135416	N/A	4.06	1	1	0	In domain	+	0.9824	+	0.9638	+	0.9511	-	0.5714	Lysosomes	0.4957	-	0.8457	+	0.9056	+	0.9755	-	1.0000	-	0.7500	-	0.6790	-	0.9391	-	0.9451	-	0.5635	-	0.7433	-	0.7591	-
MOL007879	Tetramethoxyluteolin	COc1cc(OC)c2C(=O)C=C(Oc2c1)c3ccc(OC)c(OC)c3	Zhishi	342.343	Database: TCMSP (http://tcmspnw.com)	167	U.S. Patent Application No. 15/573,583.	1e-06	0.6571	0.134852	N/A	3.49	6	0	5	In domain	+	0.9928	+	0.9125	-	0.2867	+	0.6571	Mitochondria	0.7006	-	1.0000	+	0.9442	+	0.9919	-	0.9600	-	0.9750	+	0.6137	+	0.9530	-	0.8420	-	0.5069	-	1.0000	-	0.7654	+
fuling_013	Hexadecanoic acid	CCCCCCCCCCCCCCCC(=O)O	Fuling	256.424	Book: Chemical Components of Source Plants in Traditional Chinese Medicine (ISBN: 9787030235534)	250	U.S. Patent Application No. 15/573,583.	1e-06	0.3286	0.134778	N/A	5.55	1	1	14	In domain	+	0.8417	+	0.7107	+	0.9725	-	0.6714	Mitochondria	0.5152	-	0.8483	+	0.8902	-	0.3662	-	1.0000	-	0.9250	-	0.5744	-	0.9326	-	0.9647	-	0.7568	+	0.6720	-	0.8901	-
MOL002905	Zosimin	C\C=C(\C)/C(=O)OC(C)(C)[C@@H]1Cc2c(O1)ccc3C=CC(=O)Oc23	Huanglian	328.359	Database: TCMSP (http://tcmspnw.com)	334	U.S. Patent Application No. 15/573,583.	1e-06	0.3143	0.134497	N/A	3.38	5	0	3	In domain	+	0.9821	-	0.9373	+	0.9356	-	0.6857	Mitochondria	0.7611	-	1.0000	+	0.9339	+	0.8834	-	0.9400	-	0.9250	+	0.7980	+	0.6481	-	0.8556	+	0.5212	-	0.6120	-	0.8577	+
banxia_018	beta-Sitosterol	CC[C@@H](CC[C@@H](C)[C@H]1CC[C@H]2[C@@H]3CC=C4C[C@@H](O)CC[C@]4(C)[C@H]3CC[C@]12C)C(C)C	Banxia	414.707	Book: Chemical Components of Source Plants in Traditional Chinese Medicine (ISBN: 9787030235534)	250	U.S. Patent Application No. 15/573,583.	1e-06	0.5286	0.134059	N/A	8.02	1	1	6	In domain	+	0.9930	+	0.5385	+	0.9247	+	0.5286	Lysosomes	0.4691	-	0.5873	+	0.9413	+	0.9820	-	1.0000	-	0.8750	+	0.7587	-	0.5000	+	0.8270	+	0.7187	-	0.6499	-	0.6843	-
MOL000358	beta-sitosterol	CC[C@H](CC[C@@H](C)[C@H]1CC[C@H]2[C@@H]3CC=C4C[C@@H](O)CC[C@]4(C)[C@H]3CC[C@]12C)C(C)C	Banxia	414.707	Database: TCMSP (http://tcmspnw.com)	250	U.S. Patent Application No. 15/573,583.	1e-06	0.5286	0.134059	N/A	8.02	1	1	6	In domain	+	0.9930	+	0.5385	+	0.9247	+	0.5286	Lysosomes	0.4691	-	0.5873	+	0.9413	+	0.9820	-	1.0000	-	0.8750	+	0.7587	-	0.5000	+	0.8270	+	0.7187	-	0.6499	-	0.6843	-
MOL000359	sitosterol	CC[C@H](CC[C@@H](C)[C@H]1CC[C@H]2[C@@H]3CC=C4C[C@H](O)CC[C@]4(C)[C@H]3CC[C@]12C)C(C)C	Changshan	414.707	Database: TCMSP (http://tcmspnw.com)	250	U.S. Patent Application No. 15/573,583.	1e-06	0.5286	0.134059	N/A	8.02	1	1	6	In domain	+	0.9930	+	0.5385	+	0.9247	+	0.5286	Lysosomes	0.4691	-	0.5873	+	0.9413	+	0.9820	-	1.0000	-	0.8750	+	0.7587	-	0.5000	+	0.8270	+	0.7187	-	0.6499	-	0.6843	-
MOL008173	daucosterol_qt	CC[C@@H](CC[C@@H](C)[C@@H]1CC[C@H]2[C@H]3CC=C4C[C@H](O)CC[C@@]4(C)[C@H]3CC[C@@]12C)C(C)C	Changshan	414.707	Database: TCMSP (http://tcmspnw.com)	250	U.S. Patent Application No. 15/573,583.	1e-06	0.5286	0.134059	N/A	8.02	1	1	6	In domain	+	0.9930	+	0.5385	+	0.9247	+	0.5286	Lysosomes	0.4691	-	0.5873	+	0.9413	+	0.9820	-	1.0000	-	0.8750	+	0.7587	-	0.5000	+	0.8270	+	0.7187	-	0.6499	-	0.6843	-
MOL000296	hederagenin	CC[C@H](CC[C@@H](C)[C@H]1CC[C@@H]2[C@H]3CC=C4C[C@H](O)CC[C@]4(C)[C@@H]3CC[C@]12C)C(C)C	Fuling	414.707	Database: TCMSP (http://tcmspnw.com)	250	U.S. Patent Application No. 15/573,583.	1e-06	0.5286	0.134059	N/A	8.02	1	1	6	In domain	+	0.9930	+	0.5385	+	0.9247	+	0.5286	Lysosomes	0.4691	-	0.5873	+	0.9413	+	0.9820	-	1.0000	-	0.8750	+	0.7587	-	0.5000	+	0.8270	+	0.7187	-	0.6499	-	0.6843	-
MOL000359	sitosterol	CC[C@H](CC[C@@H](C)[C@H]1CC[C@H]2[C@@H]3CC=C4C[C@H](O)CC[C@]4(C)[C@H]3CC[C@]12C)C(C)C	Qinghao	414.707	Database: TCMSP (http://tcmspnw.com)	250	U.S. Patent Application No. 15/573,583.	1e-06	0.5286	0.134059	N/A	8.02	1	1	6	In domain	+	0.9930	+	0.5385	+	0.9247	+	0.5286	Lysosomes	0.4691	-	0.5873	+	0.9413	+	0.9820	-	1.0000	-	0.8750	+	0.7587	-	0.5000	+	0.8270	+	0.7187	-	0.6499	-	0.6843	-
qinghao_125	beta-Sitosterol	CC[C@@H](CC[C@@H](C)[C@H]1CC[C@H]2[C@@H]3CC=C4C[C@@H](O)CC[C@]4(C)[C@H]3CC[C@]12C)C(C)C	Qinghao	414.707	Book: Chemical Components of Source Plants in Traditional Chinese Medicine (ISBN: 9787030235534)	250	U.S. Patent Application No. 15/573,583.	1e-06	0.5286	0.134059	N/A	8.02	1	1	6	In domain	+	0.9930	+	0.5385	+	0.9247	+	0.5286	Lysosomes	0.4691	-	0.5873	+	0.9413	+	0.9820	-	1.0000	-	0.8750	+	0.7587	-	0.5000	+	0.8270	+	0.7187	-	0.6499	-	0.6843	-
MOL000358	beta-sitosterol	CC[C@H](CC[C@@H](C)[C@H]1CC[C@H]2[C@@H]3CC=C4C[C@@H](O)CC[C@]4(C)[C@H]3CC[C@]12C)C(C)C	Renshen	414.707	Database: TCMSP (http://tcmspnw.com)	250	U.S. Patent Application No. 15/573,583.	1e-06	0.5286	0.134059	N/A	8.02	1	1	6	In domain	+	0.9930	+	0.5385	+	0.9247	+	0.5286	Lysosomes	0.4691	-	0.5873	+	0.9413	+	0.9820	-	1.0000	-	0.8750	+	0.7587	-	0.5000	+	0.8270	+	0.7187	-	0.6499	-	0.6843	-
MOL005399	alexandrin_qt	CC[C@H](CC[C@H](C)[C@@H]1CC[C@@H]2[C@@H]3CC=C4C[C@@H](O)CC[C@]4(C)[C@@H]3CC[C@]12C)C(C)C	Renshen	414.707	Database: TCMSP (http://tcmspnw.com)	250	U.S. Patent Application No. 15/573,583.	1e-06	0.5286	0.134059	N/A	8.02	1	1	6	In domain	+	0.9930	+	0.5385	+	0.9247	+	0.5286	Lysosomes	0.4691	-	0.5873	+	0.9413	+	0.9820	-	1.0000	-	0.8750	+	0.7587	-	0.5000	+	0.8270	+	0.7187	-	0.6499	-	0.6843	-
gancao_013	Gancaonin B	COc1ccc(cc1O)C2=COc3cc(O)c(CC=C(C)C)c(O)c3C2=O	Gancao	368.38	Book: Chemical Components of Source Plants in Traditional Chinese Medicine (ISBN: 9787030235534)	167	U.S. Patent Application No. 15/573,583.	1e-06	0.7	0.133503	N/A	4.09	6	3	4	In domain	+	0.9848	+	0.7001	-	0.2995	+	0.7000	Mitochondria	0.5455	-	0.5590	+	0.9545	+	0.8673	-	0.8200	-	0.9000	+	0.7401	-	0.4328	-	0.7540	+	0.5934	-	0.5929	-	0.8145	-
renshen_029	Eicosane	CCCCCCCCCCCCCCCCCCCC	Renshen	282.547	Book: Chemical Components of Source Plants in Traditional Chinese Medicine (ISBN: 9787030235534)	167	U.S. Patent Application No. 15/573,583.	1e-06	0.5286	0.131439	N/A	8.05	0	0	17	In domain	+	0.8865	+	0.9197	+	1.0000	+	0.5286	Lysosomes	0.5981	-	0.8487	+	0.9552	+	0.9429	-	0.9600	-	0.8000	-	0.6474	-	0.8975	-	0.9516	-	0.7947	-	0.8415	-	0.7215	-
maidong_011	2'-Hydroxymethylophiopogonone A	Cc1c(O)c(C)c2OC=C(Cc3ccc4OCOc4c3O)C(=O)c2c1O	Maidong	356.326	Book: Chemical Components of Source Plants in Traditional Chinese Medicine (ISBN: 9787030235534)	250	U.S. Patent Application No. 15/573,583.	1e-06	0.4429	0.130728	N/A	2.85	7	3	2	In domain	+	0.9716	+	0.6422	-	0.2972	-	0.5571	Mitochondria	0.7125	-	0.5663	+	0.8343	+	0.9010	-	0.7600	-	0.9250	-	0.5255	-	0.6791	-	0.8726	+	0.5117	-	0.5797	-	0.8467	+
MOL005030	gondoic acid	CCCCCCCC\C=C/CCCCCCCCCC(=O)O	Banxia	310.515	Database: TCMSP (http://tcmspnw.com)	250	U.S. Patent Application No. 15/573,583.	1e-06	0.3857	0.130641	N/A	6.89	1	1	17	In domain	+	0.9087	+	0.6413	+	0.9646	-	0.6143	Plasma membrane	0.5465	-	0.8518	-	0.3622	-	0.5698	-	0.9600	-	0.9000	-	0.5577	-	0.8351	-	0.9649	-	0.6902	+	0.6276	-	0.8766	-
MOL004990	7,2',4'-trihydroxy－5-methoxy-3－arylcoumarin	COc1cc(O)cc2OC(=O)C(=Cc12)c3ccc(O)cc3O	Gancao	300.263	Database: TCMSP (http://tcmspnw.com)	167	U.S. Patent Application No. 15/573,583.	1e-06	0.5571	0.130352	N/A	2.59	6	3	2	In domain	+	0.9897	+	0.8709	-	0.5978	+	0.5571	Mitochondria	0.7645	+	0.5640	+	0.8787	+	0.8662	-	0.8200	-	0.9250	-	0.7091	-	0.7583	-	0.6260	+	0.5356	-	0.8431	-	0.8139	+
qinghao_014	L-beta-Artemisia alcohol acetate	CC(=C[C@@H](OC(=O)C)C(C)(C)C=C)C	Qinghao	196.286	Book: Chemical Components of Source Plants in Traditional Chinese Medicine (ISBN: 9787030235534)	250	U.S. Patent Application No. 15/573,583.	1e-06	0.2429	0.130151	N/A	3.10	2	0	4	In domain	+	0.9815	+	0.5708	+	0.9937	-	0.7571	Mitochondria	0.7352	-	0.8610	+	0.9546	+	0.9486	-	0.9600	-	0.9250	-	0.9530	-	0.9397	-	0.9683	-	0.5410	-	1.0000	-	0.8888	-
qinghao_118	Rhamnocitrin	COc1cc(O)c2C(=O)C(=C(Oc2c1)c3ccc(O)cc3)O	Qinghao	300.263	Book: Chemical Components of Source Plants in Traditional Chinese Medicine (ISBN: 9787030235534)	250	U.S. Patent Application No. 15/573,583.	1e-06	0.3714	0.130092	N/A	2.59	6	3	2	In domain	+	0.9889	-	0.8512	-	0.4548	-	0.6286	Mitochondria	0.8113	-	0.5383	+	0.8654	+	0.9877	+	0.5400	-	0.9000	-	0.4661	-	0.4651	-	0.7937	+	0.5576	-	0.6401	-	0.8296	-
MOL000279	Cerevisterol	CC(C)[C@@H](C)\C=C\[C@@H](C)[C@H]1CC[C@H]2C3=C[C@@H](O)[C@@]4(O)C[C@@H](O)CC[C@]4(C)[C@H]3CC[C@]12C	Fuling	430.663	Database: TCMSP (http://tcmspnw.com)	250	U.S. Patent Application No. 15/573,583.	1e-06	0.5286	0.129092	N/A	5.50	3	3	4	In domain	+	0.9758	-	0.5564	+	0.9070	+	0.5286	Mitochondria	0.6139	-	1.0000	+	0.7342	+	0.9437	-	1.0000	-	0.8000	+	0.6689	-	0.6696	-	0.5972	+	0.6519	-	0.7713	-	0.7725	-
MOL003673	Wighteone	CC(=CCc1c(O)cc2OC=C(C(=O)c2c1O)c3ccc(O)cc3)C	Kushen	338.354	Database: TCMSP (http://tcmspnw.com)	250	U.S. Patent Application No. 15/573,583.	1e-06	0.4143	0.128782	N/A	4.09	5	3	3	In domain	+	0.9844	+	0.7452	-	0.4484	-	0.5857	Mitochondria	0.7620	+	0.5721	+	0.9386	+	0.9194	-	0.7400	-	0.9250	+	0.7168	-	0.5454	-	0.8523	+	0.5475	-	0.5755	-	0.8328	+
qinghao_052	3alpha,7alpha-Dihydroxy amorph-4-ene 3-acetate	CC(C)[C@]1(O)CC[C@@H](C)[C@@H]2C[C@@H](OC(=O)C)C(=C[C@H]12)C	Qinghao	280.402	Book: Chemical Components of Source Plants in Traditional Chinese Medicine (ISBN: 9787030235534)	250	U.S. Patent Application No. 15/573,583.	1e-06	0.3429	0.128616	N/A	3.32	3	1	2	In domain	+	0.9859	+	0.7253	-	0.6183	-	0.6571	Mitochondria	0.8679	-	0.8510	+	0.9254	+	0.9568	-	0.9600	-	0.5500	-	0.8069	-	0.8468	-	0.6551	+	0.6064	-	0.7948	-	0.8666	-
gancao_067	Licoricone	COc1cc(O)c(C2=COc3cc(O)ccc3C2=O)c(OC)c1CC=C(C)C	Gancao	382.406	Book: Chemical Components of Source Plants in Traditional Chinese Medicine (ISBN: 9787030235534)	167	U.S. Patent Application No. 15/573,583.	1e-06	0.7	0.128606	N/A	4.40	6	2	5	In domain	+	0.9875	+	0.7059	-	0.3809	+	0.7000	Mitochondria	0.8025	-	0.7148	+	0.8942	+	0.8489	-	0.9200	-	0.9250	+	0.6365	+	0.7873	-	0.6146	+	0.6210	-	0.8217	-	0.7552	-
maidong_024	Ophiopogonanone F	COc1ccc(C[C@@H]2COc3c(OC)c(O)c(C)c(OC)c3C2=O)c(O)c1	Maidong	374.384	Book: Chemical Components of Source Plants in Traditional Chinese Medicine (ISBN: 9787030235534)	250	U.S. Patent Application No. 15/573,583.	1e-06	0.4571	0.128412	N/A	2.87	7	2	5	In domain	+	0.9967	+	0.7633	-	0.5230	-	0.5429	Mitochondria	0.7584	-	1.0000	+	0.9240	-	0.2663	-	0.9000	-	0.9250	-	0.6298	-	0.4894	-	0.7248	+	0.5789	-	0.7859	-	0.7049	-
MOL000008	apigenin	Oc1ccc(cc1)C2=CC(=O)c3c(O)cc(O)cc3O2	Changshan	270.237	Database: TCMSP (http://tcmspnw.com)	250	U.S. Patent Application No. 15/573,583.	1e-06	0.3286	0.127889	N/A	2.58	5	3	1	In domain	+	0.9881	+	0.9313	-	0.5102	-	0.6714	Mitochondria	0.6655	-	0.6489	+	0.9360	+	0.9480	+	0.6600	-	1.0000	-	0.6857	-	0.8292	-	0.9362	-	0.5417	-	0.6443	-	0.8503	+
MOL000008	apigenin	Oc1ccc(cc1)C2=CC(=O)c3c(O)cc(O)cc3O2	Kushen	270.237	Database: TCMSP (http://tcmspnw.com)	250	U.S. Patent Application No. 15/573,583.	1e-06	0.3286	0.127889	N/A	2.58	5	3	1	In domain	+	0.9881	+	0.9313	-	0.5102	-	0.6714	Mitochondria	0.6655	-	0.6489	+	0.9360	+	0.9480	+	0.6600	-	1.0000	-	0.6857	-	0.8292	-	0.9362	-	0.5417	-	0.6443	-	0.8503	+
MOL000008	apigenin	Oc1ccc(cc1)C2=CC(=O)c3c(O)cc(O)cc3O2	Qinghao	270.237	Database: TCMSP (http://tcmspnw.com)	250	U.S. Patent Application No. 15/573,583.	1e-06	0.3286	0.127889	N/A	2.58	5	3	1	In domain	+	0.9881	+	0.9313	-	0.5102	-	0.6714	Mitochondria	0.6655	-	0.6489	+	0.9360	+	0.9480	+	0.6600	-	1.0000	-	0.6857	-	0.8292	-	0.9362	-	0.5417	-	0.6443	-	0.8503	+
MOL004913	1,3-dihydroxy-9-methoxy-6-benzofurano[3,2-c]chromenone	COc1ccc2c3C(=O)Oc4cc(O)cc(O)c4c3oc2c1	Gancao	298.247	Database: TCMSP (http://tcmspnw.com)	167	U.S. Patent Application No. 15/573,583.	1e-06	0.5429	0.127888	N/A	3.11	6	2	1	In domain	+	0.9893	+	0.6428	+	0.7885	+	0.5429	Mitochondria	0.6934	-	0.5772	+	0.9212	+	0.9356	-	0.7800	-	0.9750	-	0.8273	-	0.6795	-	0.8371	+	0.5217	-	0.8088	-	0.8314	+
qinghao_124	Scopolin	COc1cc2C=CC(=O)Oc2cc1O[C@@H]3O[C@H](CO)[C@@H](O)[C@H](O)[C@H]3O	Qinghao	354.309	Book: Chemical Components of Source Plants in Traditional Chinese Medicine (ISBN: 9787030235534)	250	U.S. Patent Application No. 15/573,583.	1e-06	0.4286	0.127228	N/A	-1.02	9	4	4	In domain	+	0.6397	-	0.8435	-	0.9420	-	0.5714	Mitochondria	0.5367	-	0.8470	+	0.8846	+	0.9769	-	0.9000	-	0.8250	-	0.7156	-	0.8887	-	0.8168	-	0.5201	-	0.8306	-	0.8491	-
MOL001484	Inermine	Oc1ccc2[C@@H]3Oc4cc5OCOc5cc4[C@@H]3COc2c1	Kushen	284.263	Database: TCMSP (http://tcmspnw.com)	250	U.S. Patent Application No. 15/573,583.	1e-06	0.3429	0.12687	N/A	2.73	5	1	0	In domain	+	0.9862	+	0.5450	+	0.9272	-	0.6571	Mitochondria	0.6697	-	0.8633	+	0.8875	+	0.9548	-	0.8800	-	0.9250	-	0.5319	-	0.7047	-	0.8393	-	0.5442	-	0.8038	+	0.3452	-
MOL003648	Inermin	Oc1ccc2[C@H]3Oc4cc5OCOc5cc4[C@H]3COc2c1	Kushen	284.263	Database: TCMSP (http://tcmspnw.com)	250	U.S. Patent Application No. 15/573,583.	1e-06	0.3429	0.12687	N/A	2.73	5	1	0	In domain	+	0.9862	+	0.5450	+	0.9272	-	0.6571	Mitochondria	0.6697	-	0.8633	+	0.8875	+	0.9548	-	0.8800	-	0.9250	-	0.5319	-	0.7047	-	0.8393	-	0.5442	-	0.8038	+	0.3452	-
MOL003648	Inermin	Oc1ccc2[C@H]3Oc4cc5OCOc5cc4[C@H]3COc2c1	Renshen	284.263	Database: TCMSP (http://tcmspnw.com)	250	U.S. Patent Application No. 15/573,583.	1e-06	0.3429	0.12687	N/A	2.73	5	1	0	In domain	+	0.9862	+	0.5450	+	0.9272	-	0.6571	Mitochondria	0.6697	-	0.8633	+	0.8875	+	0.9548	-	0.8800	-	0.9250	-	0.5319	-	0.7047	-	0.8393	-	0.5442	-	0.8038	+	0.3452	-
kushen_065	Sophoflavescenol	COc1cc(O)c(CC=C(C)C)c2OC(=C(O)C(=O)c12)c3ccc(O)cc3	Kushen	368.38	Book: Chemical Components of Source Plants in Traditional Chinese Medicine (ISBN: 9787030235534)	250	U.S. Patent Application No. 15/573,583.	1e-06	0.4429	0.126451	N/A	4.09	6	3	4	In domain	+	0.9875	+	0.5891	-	0.3354	-	0.5571	Mitochondria	0.6988	-	0.5601	+	0.8711	+	0.8671	-	0.9200	-	0.9000	+	0.8944	+	0.7614	-	0.6227	+	0.5778	-	0.8217	-	0.7552	-
kushen_010	Isoanhydroicaritin	COc1cc(O)c2C(=O)C(=C(Oc2c1CC=C(C)C)c3ccc(O)cc3)O	Kushen	368.38	Book: Chemical Components of Source Plants in Traditional Chinese Medicine (ISBN: 9787030235534)	250	U.S. Patent Application No. 15/573,583.	1e-06	0.4429	0.126451	N/A	4.09	6	3	4	In domain	+	0.9848	+	0.6538	-	0.3354	-	0.5571	Mitochondria	0.7007	-	0.5615	+	0.8742	+	0.8634	-	0.8200	-	0.9250	+	0.8502	+	0.7110	-	0.5863	+	0.5867	-	0.5929	-	0.8145	-
MOL007415	[(2S)-2-[[(2S)-2-(benzoylamino)-3-phenylpropanoyl]amino]-3-phenylpropyl] acetate	CC(=O)OC[C@H](Cc1ccccc1)NC(=O)[C@H](Cc2ccccc2)NC(=O)c3ccccc3	Qinghao	444.522	Database: TCMSP (http://tcmspnw.com)	250	U.S. Patent Application No. 15/573,583.	1e-06	0.5286	0.125068	N/A	3.32	4	2	10	In domain	+	0.9785	-	0.5718	+	0.9612	+	0.5286	Mitochondria	0.7463	-	1.0000	+	0.9061	+	0.9304	-	0.8800	-	0.8899	+	0.9545	+	0.7768	-	0.5722	+	0.5288	-	0.6106	-	0.8447	+
maidong_016	Oleanolic acid	CC1(C)CC[C@@]2(CC[C@]3(C)C(=CC[C@@H]4[C@@]5(C)CC[C@H](O)C(C)(C)[C@@H]5CC[C@@]34C)[C@@H]2C1)C(=O)O	Maidong	456.7	Book: Chemical Components of Source Plants in Traditional Chinese Medicine (ISBN: 9787030235534)	250	U.S. Patent Application No. 15/573,583.	1e-06	0.5429	0.125026	N/A	7.23	2	2	1	In domain	+	0.9853	+	0.5596	-	0.6782	+	0.5429	Mitochondria	0.8699	-	0.7192	+	0.8808	+	0.9479	-	1.0000	+	0.6000	+	0.9111	-	0.9165	-	0.9082	+	0.6412	-	0.8404	-	0.8509	-
fuling_003	beta-Amyrin acetate	CC(=O)O[C@H]1CC[C@@]2(C)[C@@H](CC[C@]3(C)[C@@H]2CC=C4[C@@H]5CC(C)(C)CC[C@]5(C)CC[C@@]34C)C1(C)C	Fuling	468.754	Book: Chemical Components of Source Plants in Traditional Chinese Medicine (ISBN: 9787030235534)	250	U.S. Patent Application No. 15/573,583.	1e-06	0.5571	0.124997	N/A	8.74	2	0	1	Warning	+	0.9906	+	0.5056	+	0.8324	+	0.5571	Mitochondria	0.7182	-	0.7240	+	0.6907	+	0.9480	-	0.8200	-	0.5750	+	0.8111	-	0.4444	-	0.9011	+	0.6833	-	1.0000	-	0.8603	-
qinghao_045	Cirsimaritin	COc1cc2OC(=CC(=O)c2c(O)c1OC)c3ccc(O)cc3	Qinghao	314.289	Book: Chemical Components of Source Plants in Traditional Chinese Medicine (ISBN: 9787030235534)	250	U.S. Patent Application No. 15/573,583.	1e-06	0.3714	0.124286	N/A	2.89	6	2	3	In domain	+	0.9889	+	0.7993	-	0.4399	-	0.6286	Mitochondria	0.8156	-	0.5740	+	0.8665	+	0.9738	+	0.5400	-	0.9500	-	0.5725	+	0.7735	-	0.7931	+	0.5525	-	0.6401	-	0.8296	-
maidong_002	6-Aldehydo-isoophiopogone B	COc1ccc(CC2=COc3c(C)c(O)c(C=O)c(O)c3C2=O)cc1	Maidong	340.327	Book: Chemical Components of Source Plants in Traditional Chinese Medicine (ISBN: 9787030235534)	250	U.S. Patent Application No. 15/573,583.	1e-06	0.4	0.123616	N/A	2.92	6	2	4	In domain	+	0.9793	+	0.6707	-	0.4650	-	0.6000	Mitochondria	0.7278	-	0.5716	+	0.7470	+	0.9422	-	0.7600	-	0.9000	+	0.6902	-	0.5738	-	0.8388	+	0.5719	-	0.5929	-	0.8140	-
MOL001845	clemastanin B_qt	COc1cc(C[C@H]2CO[C@H]([C@@H]2CO)c3ccc(O)c(OC)c3)ccc1O	Huanglian	360.401	Database: TCMSP (http://tcmspnw.com)	334	U.S. Patent Application No. 15/573,583.	1e-06	0.3143	0.122539	N/A	2.65	6	3	6	In domain	+	0.9885	+	0.6052	+	0.9169	-	0.6857	Mitochondria	0.8846	-	0.8596	+	0.8902	+	0.9483	-	1.0000	-	0.7750	+	0.6687	+	0.6106	-	0.8208	+	0.5487	-	0.8000	+	0.4095	+
MOL013437	6-Methoxy aurapten	COc1cc2C=CC(=O)Oc2cc1OC\C=C(/C)\CCC=C(C)C	Zhishi	328.402	Database: TCMSP (http://tcmspnw.com)	167	U.S. Patent Application No. 15/573,583.	1e-06	0.5714	0.122242	N/A	4.87	4	0	7	In domain	+	0.9900	+	0.8640	+	0.9267	+	0.5714	Mitochondria	0.8126	-	1.0000	+	0.9147	+	0.9352	-	0.9600	-	0.8750	+	0.9174	+	0.7920	-	0.7465	-	0.5000	-	0.6607	-	0.8073	-
MOL003218	Neouralenol	CC(=CCc1c(O)c(O)ccc1C2=C(O)C(=O)c3cc(O)c(O)cc3O2)C	Gancao	370.353	Database: TCMSP (http://tcmspnw.com)	167	U.S. Patent Application No. 15/573,583.	1e-06	0.6429	0.121959	N/A	3.50	7	5	3	In domain	+	0.9805	-	0.7054	-	0.3438	+	0.6429	Mitochondria	0.7714	+	0.5901	+	0.8928	+	0.9805	-	0.8000	-	0.9000	+	0.5746	-	0.7024	-	0.6600	+	0.5148	-	0.6328	-	0.7935	-
MOL000860	stearic acid	CCCCCCCCCCCCCCCCCC(=O)O	Banxia	284.477	Database: TCMSP (http://tcmspnw.com)	250	U.S. Patent Application No. 15/573,583.	1e-06	0.3286	0.121487	N/A	6.33	1	1	16	In domain	+	0.8417	+	0.5914	+	0.9725	-	0.6714	Mitochondria	0.5152	-	0.8476	+	0.8902	-	0.3662	-	1.0000	-	0.9250	-	0.7422	-	0.9133	-	0.9647	-	0.7568	+	0.6720	-	0.8901	-
kushen_030	Kushenol A	CC(=CC[C@H](Cc1c(O)cc(O)c2C(=O)C[C@@H](Oc12)c3ccccc3O)C(=C)C)C	Kushen	408.487	Book: Chemical Components of Source Plants in Traditional Chinese Medicine (ISBN: 9787030235534)	250	U.S. Patent Application No. 15/573,583.	1e-06	0.4714	0.121373	N/A	5.60	5	3	6	In domain	+	0.9951	-	0.6070	-	0.4500	-	0.5286	Mitochondria	0.7230	-	0.7180	+	0.8312	+	0.9375	-	0.8800	-	0.9000	+	0.8039	+	0.6315	-	0.6573	+	0.5995	+	0.5973	-	0.7963	-
MOL006614	kushenol A	CC(=CC[C@H](Cc1c(O)cc(O)c2C(=O)C[C@H](Oc12)c3ccccc3O)C(=C)C)C	Kushen	408.487	Database: TCMSP (http://tcmspnw.com)	250	U.S. Patent Application No. 15/573,583.	1e-06	0.4714	0.121373	N/A	5.60	5	3	6	In domain	+	0.9951	-	0.6070	-	0.4500	-	0.5286	Mitochondria	0.7230	-	0.7180	+	0.8312	+	0.9375	-	0.8800	-	0.9000	+	0.8039	+	0.6315	-	0.6573	+	0.5995	+	0.5973	-	0.7963	-
zhishi_012	Sinensetin	COc1ccc(cc1OC)C2=CC(=O)c3c(OC)c(OC)c(OC)cc3O2	Zhishi	372.369	Book: Chemical Components of Source Plants in Traditional Chinese Medicine (ISBN: 9787030235534)	167	U.S. Patent Application No. 15/573,583.	1e-06	0.6429	0.121299	N/A	3.50	7	0	6	In domain	+	0.9928	+	0.8813	-	0.2867	+	0.6429	Mitochondria	0.7006	-	1.0000	+	0.9483	+	0.9919	-	0.9600	-	0.9750	+	0.5757	+	0.9512	-	0.7531	+	0.5053	-	1.0000	-	0.7654	+
fuling_012	Ergosterol	CC(C)[C@@H](C)\C=C\[C@@H](C)[C@H]1CC[C@H]2C3=CC=C4C[C@@H](O)CC[C@]4(C)[C@H]3CC[C@]12C	Fuling	396.648	Book: Chemical Components of Source Plants in Traditional Chinese Medicine (ISBN: 9787030235534)	250	U.S. Patent Application No. 15/573,583.	1e-06	0.4571	0.121204	N/A	7.33	1	1	4	In domain	+	0.9950	+	0.6576	+	0.8546	-	0.5429	Mitochondria	0.4902	-	1.0000	-	0.7739	+	0.9479	-	1.0000	-	0.7500	+	0.8349	-	0.4407	-	0.6062	+	0.6365	-	0.8255	-	0.7567	-
gancao_036	Glyzaglabrin	Oc1ccc2C(=O)C(=COc2c1)c3ccc4OCOc4c3O	Gancao	298.247	Book: Chemical Components of Source Plants in Traditional Chinese Medicine (ISBN: 9787030235534)	167	U.S. Patent Application No. 15/573,583.	1e-06	0.5143	0.121151	N/A	2.60	6	2	1	In domain	+	0.9765	+	0.5000	-	0.2906	+	0.5143	Mitochondria	0.8322	-	0.5743	+	0.9007	+	0.8872	-	0.7200	-	1.0000	-	0.8662	-	0.7033	-	0.8037	+	0.5471	-	0.8137	-	0.8267	+
gancao_046	Isotrifoliol	COc1cc(O)cc2OC(=O)c3c(oc4cc(O)ccc34)c12	Gancao	298.247	Book: Chemical Components of Source Plants in Traditional Chinese Medicine (ISBN: 9787030235534)	167	U.S. Patent Application No. 15/573,583.	1e-06	0.5143	0.121151	N/A	3.11	6	2	1	In domain	+	0.9893	+	0.6401	-	0.2535	+	0.5143	Mitochondria	0.7609	-	0.5870	+	0.8885	+	0.9511	-	0.7800	-	0.9750	-	0.7436	-	0.6824	-	0.6992	-	0.5000	-	0.8088	-	0.8314	+
maidong_036	Ruscogenin 1-O-sulfate	C[C@H]1CC[C@@]2(OC1)O[C@@H]3C[C@H]4[C@@H]5CC=C6C[C@@H](O)C[C@@H](CS(=O)(=O)O)[C@]6(C)[C@H]5CC[C@]4(C)[C@H]3[C@@H]2C	Maidong	508.71	Book: Chemical Components of Source Plants in Traditional Chinese Medicine (ISBN: 9787030235534)	250	U.S. Patent Application No. 15/573,583.	1e-06	0.5857	0.121092	N/A	4.83	5	2	2	In domain	+	0.8817	-	0.7144	+	0.9732	+	0.5857	Mitochondria	0.4250	-	0.5716	+	0.8903	+	0.9406	-	0.9600	-	0.6771	+	0.8158	+	0.6403	+	0.5752	+	0.7360	-	1.0000	-	0.8047	-
MOL000458	campesterol	CC(C)[C@H](C)CC[C@@H](C)[C@H]1CC[C@H]2[C@@H]3CC[C@@H]4CC(=CC[C@]4(C)[C@H]3CC[C@]12C)O	Banxia	400.68	Database: TCMSP (http://tcmspnw.com)	250	U.S. Patent Application No. 15/573,583.	1e-06	0.4571	0.119984	N/A	8.41	1	1	5	Warning	+	0.9826	+	0.6533	+	0.8531	-	0.5429	Lysosomes	0.4629	-	0.7264	+	0.8239	+	0.9292	-	0.9400	-	0.8250	+	0.6445	-	0.5426	-	0.5543	+	0.6945	-	0.7965	-	0.7614	-
kushen_020	Kosamol T	CC(=C)[C@@H](CCC(C)(C)O)Cc1c(O)cc(O)c2C(=O)C[C@H](Oc12)c3ccccc3O	Kushen	426.502	Book: Chemical Components of Source Plants in Traditional Chinese Medicine (ISBN: 9787030235534)	250	U.S. Patent Application No. 15/573,583.	1e-06	0.4857	0.119773	N/A	4.80	6	4	7	In domain	+	0.9917	-	0.6498	+	0.8069	-	0.5143	Mitochondria	0.7086	-	0.7178	+	0.8399	+	0.9039	-	1.0000	-	0.9250	+	0.8542	+	0.5795	-	0.5246	+	0.6221	-	0.8024	-	0.8198	+
maidong_020	Ophiopogonanone B	COc1ccc(C[C@H]2COc3cc(O)c(C)c(O)c3C2=O)cc1	Maidong	314.333	Book: Chemical Components of Source Plants in Traditional Chinese Medicine (ISBN: 9787030235534)	250	U.S. Patent Application No. 15/573,583.	1e-06	0.3571	0.119484	N/A	2.85	5	2	3	In domain	+	0.9956	+	0.8680	-	0.4450	-	0.6429	Mitochondria	0.7690	-	1.0000	+	0.9279	+	0.8566	-	0.8800	-	0.9500	+	0.5629	-	0.7036	-	0.7733	+	0.5718	+	0.5969	-	0.7779	+
zhishi_004	Isosinensetin	COc1ccc(cc1OC)C2=CC(=O)c3c(OC)cc(OC)c(OC)c3O2	Zhishi	372.369	Book: Chemical Components of Source Plants in Traditional Chinese Medicine (ISBN: 9787030235534)	167	U.S. Patent Application No. 15/573,583.	1e-06	0.6286	0.118601	N/A	3.50	7	0	6	In domain	+	0.9928	+	0.9100	-	0.2867	+	0.6286	Mitochondria	0.7006	-	1.0000	+	0.9400	+	0.9919	-	0.9600	-	0.9750	+	0.7879	+	0.9623	-	0.8341	+	0.5063	-	1.0000	-	0.7654	+
fuling_025	Poricoic acid C	CC(C)C(=C)CC[C@H]([C@H]1CC[C@@]2(C)C3=CC[C@@H](C(=C)C)[C@](C)(CCC(=O)O)C3=CC[C@]12C)C(=O)O	Fuling	482.695	Book: Chemical Components of Source Plants in Traditional Chinese Medicine (ISBN: 9787030235534)	250	U.S. Patent Application No. 15/573,583.	1e-06	0.5429	0.118293	N/A	7.83	2	2	10	In domain	+	0.9929	+	0.6160	-	0.5845	+	0.5429	Mitochondria	0.7678	-	0.5742	+	0.8664	-	0.4528	-	0.9200	-	0.6032	+	0.8081	+	0.6179	+	0.5582	+	0.6528	-	0.6168	-	0.8908	-
maidong_039	2,5,7-Trihydroxy-6,8-dimethyl-3-(3’,4’-methylenedioxybenzyl)chroman-4-one	Cc1c(O)c(C)c2O[C@H](O)[C@@H](Cc3ccc4OCOc4c3)C(=O)c2c1O	Maidong	358.342	Book: Chemical Components of Source Plants in Traditional Chinese Medicine (ISBN: 9787030235534)	250	U.S. Patent Application No. 15/573,583.	1e-06	0.4	0.117401	N/A	2.20	7	3	2	In domain	+	0.9814	-	0.5854	-	0.2453	-	0.6000	Mitochondria	0.7229	-	0.7200	+	0.8460	+	0.8383	-	0.8400	-	0.9250	-	0.6152	-	0.6590	-	0.8127	+	0.5309	+	0.6173	-	0.8391	+
zhishi_015	5,7,8,4’-Tetramethoxytlavone	COc1ccc(cc1)C2=CC(=O)c3c(OC)cc(OC)c(OC)c3O2	Zhishi	342.343	Book: Chemical Components of Source Plants in Traditional Chinese Medicine (ISBN: 9787030235534)	167	U.S. Patent Application No. 15/573,583.	1e-06	0.5714	0.117265	N/A	3.49	6	0	5	In domain	+	0.9928	+	0.9435	-	0.2867	+	0.5714	Mitochondria	0.7006	-	1.0000	+	0.9255	+	0.9919	-	0.9600	-	0.9750	+	0.7588	+	0.9581	-	0.9180	+	0.5281	-	1.0000	-	0.7654	+
banxia_010	9-Heptadecanol	CCCCCCCCC(O)CCCCCCCC	Banxia	256.467	Book: Chemical Components of Source Plants in Traditional Chinese Medicine (ISBN: 9787030235534)	250	U.S. Patent Application No. 15/573,583.	1e-06	0.2857	0.117163	N/A	5.85	1	1	14	In domain	+	0.9548	+	0.9087	+	1.0000	-	0.7143	Mitochondria	0.4494	-	0.8438	+	0.9600	+	0.9044	-	0.9800	-	0.8500	-	0.7052	-	0.9106	-	0.9033	-	0.7169	-	1.0000	-	0.6625	-
kushen_014	Noranhydroicaritin	CC(=CCc1c(O)cc(O)c2C(=O)C(=C(Oc12)c3ccc(O)cc3)O)C	Kushen	354.353	Book: Chemical Components of Source Plants in Traditional Chinese Medicine (ISBN: 9787030235534)	250	U.S. Patent Application No. 15/573,583.	1e-06	0.3857	0.114479	N/A	3.79	6	4	3	In domain	+	0.9844	+	0.5406	-	0.3575	-	0.6143	Mitochondria	0.6291	+	0.5816	+	0.8516	+	0.9248	-	0.7400	-	0.9250	+	0.8785	-	0.5560	-	0.6380	+	0.5319	-	0.5755	-	0.8328	-
gancao_092	n-Tricosane	CCCCCCCCCCCCCCCCCCCCCCC	Gancao	324.627	Book: Chemical Components of Source Plants in Traditional Chinese Medicine (ISBN: 9787030235534)	167	U.S. Patent Application No. 15/573,583.	1e-06	0.5286	0.114401	N/A	9.22	0	0	20	Warning	+	0.8865	+	0.8385	+	1.0000	+	0.5286	Lysosomes	0.5981	-	0.8500	+	0.9552	+	0.9429	-	0.9600	-	0.8000	-	0.7181	-	0.8539	-	0.9516	-	0.7947	-	0.8415	-	0.7215	-
maidong_019	Ophiopogonanone A	Cc1c(O)cc2OC[C@H](Cc3ccc4OCOc4c3)C(=O)c2c1O	Maidong	328.316	Book: Chemical Components of Source Plants in Traditional Chinese Medicine (ISBN: 9787030235534)	250	U.S. Patent Application No. 15/573,583.	1e-06	0.3571	0.114395	N/A	2.57	6	2	2	In domain	+	0.9894	+	0.7510	+	0.8044	-	0.6429	Mitochondria	0.6990	-	0.7204	+	0.9150	+	0.9058	-	0.8600	-	0.9500	+	0.6770	-	0.6369	-	0.8063	+	0.5190	-	0.6023	-	0.8158	+
kushen_018	Kosamol R	COc1cc(O)c(C[C@H](CC=C(C)C)C(=C)C)c2O[C@@H](CC(=O)c12)c3ccccc3O	Kushen	422.513	Book: Chemical Components of Source Plants in Traditional Chinese Medicine (ISBN: 9787030235534)	250	U.S. Patent Application No. 15/573,583.	1e-06	0.4571	0.113784	N/A	5.90	5	2	7	In domain	+	0.9965	+	0.5234	-	0.3909	-	0.5429	Mitochondria	0.7997	-	1.0000	+	0.8428	+	0.9045	-	0.9200	-	0.9250	+	0.9265	+	0.7667	-	0.6105	+	0.6482	-	0.7880	-	0.7350	-
MOL000449	Stigmasterol	CC[C@H](\C=C\[C@@H](C)[C@H]1CC[C@H]2[C@@H]3CC=C4C[C@@H](O)CC[C@]4(C)[C@H]3CC[C@]12C)C(C)C	Banxia	412.691	Database: TCMSP (http://tcmspnw.com)	250	U.S. Patent Application No. 15/573,583.	1e-06	0.4429	0.112873	N/A	7.80	1	1	5	In domain	+	0.9914	+	0.5455	+	0.9247	-	0.5571	Lysosomes	0.4691	-	1.0000	+	0.9161	+	0.9820	-	1.0000	-	0.8750	+	0.7487	-	0.4322	+	0.7256	+	0.7080	-	0.6197	-	0.7147	-
MOL000449	Stigmasterol	CC[C@H](\C=C\[C@@H](C)[C@H]1CC[C@H]2[C@@H]3CC=C4C[C@@H](O)CC[C@]4(C)[C@H]3CC[C@]12C)C(C)C	Changshan	412.691	Database: TCMSP (http://tcmspnw.com)	250	U.S. Patent Application No. 15/573,583.	1e-06	0.4429	0.112873	N/A	7.80	1	1	5	In domain	+	0.9914	+	0.5455	+	0.9247	-	0.5571	Lysosomes	0.4691	-	1.0000	+	0.9161	+	0.9820	-	1.0000	-	0.8750	+	0.7487	-	0.4322	+	0.7256	+	0.7080	-	0.6197	-	0.7147	-
maidong_037	Stigmasterol	CC[C@@H](\C=C\[C@@H](C)[C@H]1CC[C@H]2[C@@H]3CC=C4C[C@@H](O)CC[C@]4(C)[C@H]3CC[C@]12C)C(C)C	Maidong	412.691	Book: Chemical Components of Source Plants in Traditional Chinese Medicine (ISBN: 9787030235534)	250	U.S. Patent Application No. 15/573,583.	1e-06	0.4429	0.112873	N/A	7.80	1	1	5	In domain	+	0.9914	+	0.5455	+	0.9247	-	0.5571	Lysosomes	0.4691	-	1.0000	+	0.9161	+	0.9820	-	1.0000	-	0.8750	+	0.7487	-	0.4322	+	0.7256	+	0.7080	-	0.6197	-	0.7147	-
MOL000449	Stigmasterol	CC[C@H](\C=C\[C@@H](C)[C@H]1CC[C@H]2[C@@H]3CC=C4C[C@@H](O)CC[C@]4(C)[C@H]3CC[C@]12C)C(C)C	Qinghao	412.691	Database: TCMSP (http://tcmspnw.com)	250	U.S. Patent Application No. 15/573,583.	1e-06	0.4429	0.112873	N/A	7.80	1	1	5	In domain	+	0.9914	+	0.5455	+	0.9247	-	0.5571	Lysosomes	0.4691	-	1.0000	+	0.9161	+	0.9820	-	1.0000	-	0.8750	+	0.7487	-	0.4322	+	0.7256	+	0.7080	-	0.6197	-	0.7147	-
qinghao_126	Stigmasterol	CC[C@@H](\C=C\[C@@H](C)[C@H]1CC[C@H]2[C@@H]3CC=C4C[C@@H](O)CC[C@]4(C)[C@H]3CC[C@]12C)C(C)C	Qinghao	412.691	Book: Chemical Components of Source Plants in Traditional Chinese Medicine (ISBN: 9787030235534)	250	U.S. Patent Application No. 15/573,583.	1e-06	0.4429	0.112873	N/A	7.80	1	1	5	In domain	+	0.9914	+	0.5455	+	0.9247	-	0.5571	Lysosomes	0.4691	-	1.0000	+	0.9161	+	0.9820	-	1.0000	-	0.8750	+	0.7487	-	0.4322	+	0.7256	+	0.7080	-	0.6197	-	0.7147	-
MOL000449	Stigmasterol	CC[C@H](\C=C\[C@@H](C)[C@H]1CC[C@H]2[C@@H]3CC=C4C[C@@H](O)CC[C@]4(C)[C@H]3CC[C@]12C)C(C)C	Renshen	412.691	Database: TCMSP (http://tcmspnw.com)	250	U.S. Patent Application No. 15/573,583.	1e-06	0.4429	0.112873	N/A	7.80	1	1	5	In domain	+	0.9914	+	0.5455	+	0.9247	-	0.5571	Lysosomes	0.4691	-	1.0000	+	0.9161	+	0.9820	-	1.0000	-	0.8750	+	0.7487	-	0.4322	+	0.7256	+	0.7080	-	0.6197	-	0.7147	-
MOL004915	Eurycarpin A	CC(=CCc1c(O)ccc(C2=COc3cc(O)ccc3C2=O)c1O)C	Gancao	338.354	Database: TCMSP (http://tcmspnw.com)	167	U.S. Patent Application No. 15/573,583.	1e-06	0.5429	0.112729	N/A	4.09	5	3	3	In domain	+	0.9857	+	0.6836	-	0.4484	+	0.5429	Mitochondria	0.7620	+	0.5700	+	0.8715	+	0.9194	-	0.8600	-	0.9250	+	0.5822	-	0.5681	-	0.6798	+	0.5721	-	0.6241	-	0.7799	+
MOL004828	Glepidotin A	CC(=CCc1c(O)cc(O)c2C(=O)C(=C(Oc12)c3ccccc3)O)C	Gancao	338.354	Database: TCMSP (http://tcmspnw.com)	167	U.S. Patent Application No. 15/573,583.	1e-06	0.5429	0.112729	N/A	4.09	5	3	3	In domain	+	0.9844	-	0.6088	-	0.3575	+	0.5429	Mitochondria	0.6291	-	0.5580	+	0.9184	+	0.9248	-	0.7400	-	0.9250	+	0.8020	+	0.5737	-	0.7568	-	0.5215	-	0.5755	-	0.8328	-
MOL005366	Malvic acid	CCCCCCCCC1=C(CCCCCCC(=O)O)C1	Renshen	280.445	Database: TCMSP (http://tcmspnw.com)	250	U.S. Patent Application No. 15/573,583.	1e-06	0.3	0.112508	N/A	5.86	1	1	14	In domain	+	0.9119	+	0.7815	+	0.9001	-	0.7000	Mitochondria	0.5225	-	0.8488	+	0.8894	+	0.8161	-	0.9800	-	0.7750	-	0.5926	-	0.8273	-	0.8830	-	0.6548	+	0.6464	-	0.8876	-
gancao_025	Glycycoumarin	COc1c(CC=C(C)C)c(O)cc2OC(=O)C(=Cc12)c3ccc(O)cc3O	Gancao	368.38	Book: Chemical Components of Source Plants in Traditional Chinese Medicine (ISBN: 9787030235534)	167	U.S. Patent Application No. 15/573,583.	1e-06	0.5857	0.111703	N/A	4.09	6	3	4	In domain	+	0.9877	+	0.7684	-	0.4676	+	0.5857	Mitochondria	0.6868	+	0.5732	+	0.8717	-	0.3053	-	0.9200	-	0.9000	+	0.5735	+	0.5851	-	0.5946	+	0.5784	-	0.6172	-	0.8048	-
fuling_023	Poricoic acid A	CC(C)C(=C)CC[C@H]([C@H]1[C@H](O)C[C@@]2(C)C3=CC[C@@H](C(=C)C)[C@](C)(CCC(=O)O)C3=CC[C@]12C)C(=O)O	Fuling	498.694	Book: Chemical Components of Source Plants in Traditional Chinese Medicine (ISBN: 9787030235534)	250	U.S. Patent Application No. 15/573,583.	1e-06	0.5286	0.111482	N/A	6.80	3	3	10	In domain	+	0.9923	+	0.6444	-	0.9493	+	0.5286	Mitochondria	0.8561	-	0.7142	+	0.8693	-	0.5674	-	0.9800	-	0.6282	+	0.7762	+	0.5803	+	0.5741	+	0.6469	-	0.8398	-	0.8724	-
gancao_012	Gancaonin A	COc1ccc(cc1)C2=COc3cc(O)c(CC=C(C)C)c(O)c3C2=O	Gancao	352.38	Book: Chemical Components of Source Plants in Traditional Chinese Medicine (ISBN: 9787030235534)	167	U.S. Patent Application No. 15/573,583.	1e-06	0.5571	0.111073	N/A	4.39	5	2	4	In domain	+	0.9848	+	0.7363	-	0.3187	+	0.5571	Mitochondria	0.7048	-	0.5692	+	0.9500	+	0.8466	-	0.8200	-	0.9000	+	0.7059	+	0.6648	-	0.8758	+	0.5854	-	0.5929	-	0.8145	-
MOL006596	Glyceollin	CC1(C)Oc2ccc3[C@@H]4Oc5cc(O)ccc5[C@]4(O)COc3c2C=C1	Kushen	338.354	Database: TCMSP (http://tcmspnw.com)	250	U.S. Patent Application No. 15/573,583.	1e-06	0.3571	0.111002	N/A	3.29	5	2	0	In domain	+	0.9881	+	0.6653	+	0.9473	-	0.6429	Mitochondria	0.7697	-	0.8560	+	0.8598	+	0.9573	-	1.0000	-	0.9250	+	0.6948	-	0.6670	+	0.6165	+	0.6229	+	0.5947	-	0.7209	-
fuling_026	Poricoic acid D	CC(=C)[C@@H]1CC=C2C(=CC[C@]3(C)[C@@H]([C@@H](CCC(=C)C(C)(C)O)C(=O)O)[C@H](O)C[C@@]23C)[C@@]1(C)CCC(=O)O	Fuling	514.693	Book: Chemical Components of Source Plants in Traditional Chinese Medicine (ISBN: 9787030235534)	250	U.S. Patent Application No. 15/573,583.	1e-06	0.5429	0.110938	N/A	5.91	4	4	10	In domain	+	0.9895	+	0.5000	-	0.9493	+	0.5429	Mitochondria	0.8561	-	0.7160	+	0.8570	-	0.5674	-	0.9800	-	0.6282	+	0.7760	-	0.4394	+	0.5958	+	0.6775	-	0.8203	-	0.8840	-
maidong_031	Ophiopogonone A	Cc1c(O)cc2OC=C(Cc3ccc4OCOc4c3)C(=O)c2c1O	Maidong	326.3	Book: Chemical Components of Source Plants in Traditional Chinese Medicine (ISBN: 9787030235534)	250	U.S. Patent Application No. 15/573,583.	1e-06	0.3429	0.110525	N/A	2.83	6	2	2	In domain	+	0.9716	+	0.7911	-	0.2579	-	0.6571	Mitochondria	0.7262	-	0.5704	+	0.9103	+	0.8565	-	0.7600	-	0.9500	+	0.5613	-	0.5197	-	0.8500	+	0.5281	-	0.5797	-	0.8467	+
maidong_008	N-trans-Feruloyltyramine	COc1cc(\C=C\C(=O)NCCc2ccc(O)cc2)ccc1O	Maidong	313.348	Book: Chemical Components of Source Plants in Traditional Chinese Medicine (ISBN: 9787030235534)	250	U.S. Patent Application No. 15/573,583.	1e-06	0.3286	0.110294	N/A	2.48	4	3	6	In domain	+	0.9652	-	0.5955	+	0.9414	-	0.6714	Mitochondria	0.7966	-	0.8554	+	0.9218	+	0.9549	-	0.8400	-	0.7750	+	0.9082	-	0.7866	+	0.5314	+	0.5408	-	0.8097	-	0.7988	+
kushen_015	Isoxanthohumol	COc1cc(O)c(CC=C(C)C)c2O[C@@H](CC(=O)c12)c3ccc(O)cc3	Kushen	354.396	Book: Chemical Components of Source Plants in Traditional Chinese Medicine (ISBN: 9787030235534)	250	U.S. Patent Application No. 15/573,583.	1e-06	0.3714	0.110221	N/A	4.32	5	2	4	In domain	+	0.9954	+	0.8888	-	0.3803	-	0.6286	Mitochondria	0.8193	-	1.0000	+	0.8759	+	0.8676	-	0.9800	-	0.9000	+	0.7040	+	0.6152	-	0.7641	+	0.5904	-	0.8006	-	0.7235	-
kushen_056	5-O-Methyl kushenol C	COc1cc(O)c(C[C@@H](CC=C(C)C)C(=C)C)c2OC(=C(O)C(=O)c12)c3ccc(O)cc3O	Kushen	452.496	Book: Chemical Components of Source Plants in Traditional Chinese Medicine (ISBN: 9787030235534)	250	U.S. Patent Application No. 15/573,583.	1e-06	0.4714	0.109568	N/A	5.38	7	4	7	In domain	+	0.9901	-	0.7149	-	0.2995	-	0.5286	Mitochondria	0.5415	-	0.5630	+	0.7276	+	0.8665	-	0.9000	-	0.9000	+	0.9505	+	0.7206	+	0.5871	+	0.6281	-	0.7952	-	0.7564	-
MOL000486	Prunetin	COc1cc(O)c2C(=O)C(=COc2c1)c3ccc(O)cc3	Gancao	284.263	Database: TCMSP (http://tcmspnw.com)	167	U.S. Patent Application No. 15/573,583.	1e-06	0.4429	0.109464	N/A	2.88	5	2	2	In domain	+	0.9889	+	0.9211	-	0.5000	-	0.5571	Mitochondria	0.8722	-	0.5789	+	0.9466	+	0.9909	+	0.5400	-	0.9000	-	0.5673	-	0.6363	-	0.9399	+	0.5323	-	0.6401	-	0.8296	-
MOL006647	sophoraisoflavanone,a	CCOc1c(C\C(=C\CC)\C)c(O)ccc1[C@H]2COc3cc(O)cc(O)c3C2=O	Kushen	398.449	Database: TCMSP (http://tcmspnw.com)	250	U.S. Patent Application No. 15/573,583.	1e-06	0.4143	0.109359	N/A	4.46	6	3	6	In domain	+	0.9951	+	0.6415	-	0.2497	-	0.5857	Mitochondria	0.7436	-	0.7213	+	0.8999	+	0.9103	-	0.8800	-	0.8500	+	0.8830	+	0.7287	-	0.6640	+	0.6452	+	0.5973	-	0.7963	-
MOL013439	citrusin A_qt	COc1cc(ccc1O)[C@H](O)[C@@H](CO)Oc2ccc(\C=C/CO)cc2OC	Zhishi	376.4	Database: TCMSP (http://tcmspnw.com)	167	U.S. Patent Application No. 15/573,583.	1e-06	0.5857	0.109323	N/A	1.89	7	4	9	In domain	+	0.9819	+	0.4935	+	0.8555	+	0.5857	Mitochondria	0.6830	-	0.8528	+	0.8663	+	0.9631	-	0.9800	-	0.8588	+	0.6825	+	0.7440	-	0.7112	-	0.5211	-	0.5976	-	0.6936	-
MOL004815	(E)-1-(2,4-dihydroxyphenyl)-3-(2,2-dimethylchromen-6-yl)prop-2-en-1-one	CC1(C)Oc2ccc(\C=C\C(=O)c3ccc(O)cc3O)cc2C=C1	Gancao	322.355	Database: TCMSP (http://tcmspnw.com)	167	U.S. Patent Application No. 15/573,583.	1e-06	0.5	0.108974	N/A	4.18	4	2	3	In domain	+	0.9881	+	0.8099	-	0.2477	-	0.5000	Mitochondria	0.7226	-	0.5753	+	0.9024	+	0.9739	-	0.9000	-	1.0000	+	0.8202	-	0.6389	-	0.7069	+	0.5618	-	0.7983	-	0.8506	+
MOL000283	Ergosterol peroxide	CC(C)[C@@H](C)CC[C@@H](C)[C@H]1CC[C@@H]2[C@]1(C)CC[C@]3(C)[C@H]4CC[C@@H](O)C[C@]45OO[C@]23C=C5	Fuling	430.663	Database: TCMSP (http://tcmspnw.com)	250	U.S. Patent Application No. 15/573,583.	1e-06	0.4429	0.108163	N/A	6.70	3	1	5	In domain	+	0.9769	+	0.6158	+	0.9639	-	0.5571	Mitochondria	0.4975	-	1.0000	+	0.8611	+	0.9148	-	0.9800	-	0.8250	+	0.7146	-	0.5653	-	0.5225	+	0.6638	-	1.0000	-	0.7078	-
huanglian_005	3,4-Dihydroxyphenylethyl alcohol glucoside	OC[C@H]1O[C@@H](OCCc2ccc(O)c(O)c2)[C@H](O)[C@@H](O)[C@@H]1O	Huanglian	316.304	Book: Chemical Components of Source Plants in Traditional Chinese Medicine (ISBN: 9787030235534)	334	U.S. Patent Application No. 15/573,583.	1e-06	0.2429	0.107905	N/A	-1.54	8	6	5	In domain	-	0.8691	-	0.8055	+	0.9090	-	0.7571	Mitochondria	0.7299	-	0.8592	+	0.9138	+	0.9377	-	0.8800	-	0.7750	-	0.9641	-	0.9469	-	0.9515	-	0.5295	-	1.0000	-	0.7997	-
MOL004863	3-(3,4-dihydroxyphenyl)-5,7-dihydroxy-8-(3-methylbut-2-enyl)chromone	CC(=CCc1c(O)cc(O)c2C(=O)C(=COc12)c3ccc(O)c(O)c3)C	Gancao	354.353	Database: TCMSP (http://tcmspnw.com)	167	U.S. Patent Application No. 15/573,583.	1e-06	0.5429	0.107639	N/A	3.79	6	4	3	In domain	+	0.9783	-	0.5452	-	0.3078	+	0.5429	Mitochondria	0.6318	+	0.5811	+	0.9403	+	0.9692	-	0.7000	-	0.9000	+	0.6451	-	0.6370	-	0.8554	+	0.5191	-	0.6039	-	0.8389	-
gancao_026	Glycyrin	COc1cc2OC(=O)C(=Cc2c(OC)c1CC=C(C)C)c3ccc(O)cc3O	Gancao	382.406	Book: Chemical Components of Source Plants in Traditional Chinese Medicine (ISBN: 9787030235534)	167	U.S. Patent Application No. 15/573,583.	1e-06	0.5857	0.107606	N/A	4.40	6	2	5	In domain	+	0.9877	+	0.8032	-	0.4676	+	0.5857	Mitochondria	0.7005	-	0.7153	+	0.8695	-	0.3233	-	0.9200	-	0.9250	+	0.7088	+	0.7504	+	0.5125	+	0.5709	-	0.6172	-	0.8048	-
MOL005828	nobiletin	COc1ccc(cc1OC)C2=CC(=O)c3c(OC)c(OC)c(OC)c(OC)c3O2	Zhishi	402.395	Database: TCMSP (http://tcmspnw.com)	167	U.S. Patent Application No. 15/573,583.	1e-06	0.6143	0.107255	N/A	3.51	8	0	7	In domain	+	0.9928	+	0.8660	-	0.2867	+	0.6143	Mitochondria	0.7006	-	1.0000	+	0.9490	+	0.9919	-	0.9600	-	0.9750	+	0.7932	+	0.9512	-	0.8493	-	0.5212	-	1.0000	-	0.7654	+
MOL000456	Phaseolin	CC1(C)Oc2ccc3[C@@H]4COc5cc(O)ccc5[C@@H]4Oc3c2C=C1	Kushen	322.355	Database: TCMSP (http://tcmspnw.com)	250	U.S. Patent Application No. 15/573,583.	1e-06	0.3286	0.107212	N/A	4.19	4	1	0	In domain	+	0.9932	+	0.8119	+	0.9597	-	0.6714	Mitochondria	0.7829	-	0.8613	+	0.8827	+	0.9734	-	1.0000	-	0.8750	+	0.7176	-	0.5388	+	0.5250	+	0.6098	+	0.8070	-	0.7007	-
qinghao_005	Anomalamide	CC[C@H](C)C(=O)O[C@H]1C[C@@]2(O)CO[C@@]3(O)[C@H]4O[C@@]4(C)[C@@H]([C@H]5OC(=O)C(=C)[C@H]15)[C@@H]23	Qinghao	394.416	Book: Chemical Components of Source Plants in Traditional Chinese Medicine (ISBN: 9787030235534)	250	U.S. Patent Application No. 15/573,583.	1e-06	0.4	0.106664	N/A	0.30	8	2	3	In domain	+	0.8074	-	0.6454	+	0.9477	-	0.6000	Mitochondria	0.5750	-	1.0000	+	0.8932	+	0.9318	-	0.9400	-	0.9000	-	0.7449	-	0.6493	-	0.5304	+	0.6491	-	1.0000	-	0.8906	-
kushen_034	Kusbenol E	CC(=CCc1c(O)c(CC=C(C)C)c2O[C@@H](CC(=O)c2c1O)c3ccc(O)cc3O)C	Kushen	424.486	Book: Chemical Components of Source Plants in Traditional Chinese Medicine (ISBN: 9787030235534)	250	U.S. Patent Application No. 15/573,583.	1e-06	0.4286	0.106194	N/A	5.23	6	4	5	In domain	+	0.9942	-	0.5605	-	0.4500	-	0.5714	Mitochondria	0.7773	-	0.5729	+	0.8447	+	0.9423	-	0.9600	-	0.8750	+	0.7421	+	0.5945	-	0.5805	+	0.5982	-	0.7977	-	0.7912	-
MOL000657	Kushenol E	CC(=CCc1c(O)c(CC=C(C)C)c2O[C@H](CC(=O)c2c1O)c3ccc(O)cc3O)C	Kushen	424.486	Database: TCMSP (http://tcmspnw.com)	250	U.S. Patent Application No. 15/573,583.	1e-06	0.4286	0.106194	N/A	5.23	6	4	5	In domain	+	0.9942	-	0.5605	-	0.4500	-	0.5714	Mitochondria	0.7773	-	0.5729	+	0.8447	+	0.9423	-	0.9600	-	0.8750	+	0.7421	+	0.5945	-	0.5805	+	0.5982	-	0.7977	-	0.7912	-
gancao_051	Licocoumarone	COc1c(CC=C(C)C)c(O)cc2oc(cc12)c3ccc(O)cc3O	Gancao	340.37	Book: Chemical Components of Source Plants in Traditional Chinese Medicine (ISBN: 9787030235534)	167	U.S. Patent Application No. 15/573,583.	1e-06	0.5143	0.106158	N/A	4.73	5	3	4	In domain	+	0.9898	+	0.6971	+	0.8955	+	0.5143	Mitochondria	0.6316	-	0.5694	+	0.8590	+	0.8831	-	0.8600	-	0.9250	+	0.7217	-	0.5104	+	0.5258	+	0.5678	-	1.0000	+	0.4182	+
maidong_006	N-( trans-p-Coumaroyl) tyramine	Oc1ccc(CCNC(=O)\C=C\c2ccc(O)cc2)cc1	Maidong	283.322	Book: Chemical Components of Source Plants in Traditional Chinese Medicine (ISBN: 9787030235534)	250	U.S. Patent Application No. 15/573,583.	1e-06	0.2857	0.106057	N/A	2.47	3	3	5	In domain	+	0.9516	+	0.6214	+	0.9470	-	0.7143	Mitochondria	0.8113	-	1.0000	+	0.9160	+	0.9379	-	0.7800	-	0.7500	-	0.6071	-	0.9027	-	0.5758	-	0.5815	-	0.8047	-	0.8192	-
MOL004911	Glabrene	CC1(C)Oc2c(C=C1)c(O)ccc2C3=Cc4ccc(O)cc4OC3	Gancao	322.355	Database: TCMSP (http://tcmspnw.com)	167	U.S. Patent Application No. 15/573,583.	1e-06	0.4857	0.105858	N/A	4.22	4	2	1	In domain	+	0.9934	+	0.7873	+	0.8825	-	0.5143	Mitochondria	0.8523	-	0.8504	+	0.8829	+	0.9642	-	1.0000	-	0.9500	+	0.7760	-	0.5401	+	0.5557	+	0.5993	+	0.6124	-	0.6593	+
kushen_045	Kushenol P	COc1cc(O)ccc1[C@@H]2CC(=O)c3c(O)cc(O)c(C[C@@H](CCC(C)(C)O)C(=C)C)c3O2	Kushen	456.528	Book: Chemical Components of Source Plants in Traditional Chinese Medicine (ISBN: 9787030235534)	250	U.S. Patent Application No. 15/573,583.	1e-06	0.4571	0.105306	N/A	4.80	7	4	8	In domain	+	0.9917	-	0.5919	+	0.7900	-	0.5429	Mitochondria	0.7117	-	0.8592	+	0.8529	+	0.8851	-	1.0000	-	0.9500	+	0.8292	+	0.6464	+	0.6420	+	0.6616	-	0.8024	-	0.8198	+
fuling_027	Poricoic acid DM	COC(=O)CC[C@@]1(C)[C@@H](CC=C2C1=CC[C@]3(C)[C@@H]([C@@H](CCC(=C)C(C)(C)O)C(=O)O)[C@H](O)C[C@@]23C)C(=C)C	Fuling	528.72	Book: Chemical Components of Source Plants in Traditional Chinese Medicine (ISBN: 9787030235534)	250	U.S. Patent Application No. 15/573,583.	1e-06	0.5286	0.105151	N/A	6.00	5	3	10	In domain	+	0.9841	-	0.5571	-	0.8156	+	0.5286	Mitochondria	0.8625	-	0.8566	+	0.8497	-	0.6275	-	0.9200	-	0.7282	+	0.8848	+	0.6254	+	0.6477	+	0.6958	-	1.0000	-	0.8933	-
MOL004866	2-(3,4-dihydroxyphenyl)-5,7-dihydroxy-6-(3-methylbut-2-enyl)chromone	CC(=CCc1c(O)cc2OC(=CC(=O)c2c1O)c3ccc(O)c(O)c3)C	Gancao	354.353	Database: TCMSP (http://tcmspnw.com)	167	U.S. Patent Application No. 15/573,583.	1e-06	0.5286	0.104804	N/A	3.79	6	4	3	In domain	+	0.9783	-	0.5819	-	0.3078	+	0.5286	Mitochondria	0.6318	-	0.5513	+	0.9421	+	0.9692	-	0.7000	-	0.9000	+	0.6957	-	0.5729	-	0.8379	+	0.5259	-	0.6039	-	0.8389	-
MOL004912	Glabrone	CC1(C)Oc2ccc(C3=COc4cc(O)ccc4C3=O)c(O)c2C=C1	Gancao	336.338	Database: TCMSP (http://tcmspnw.com)	167	U.S. Patent Application No. 15/573,583.	1e-06	0.5	0.104443	N/A	4.06	5	2	1	In domain	+	0.9774	+	0.5810	-	0.2357	-	0.5000	Mitochondria	0.8793	-	0.5685	+	0.8136	+	0.9735	-	0.9400	-	1.0000	+	0.6537	-	0.4748	-	0.5189	+	0.6466	-	1.0000	-	0.7991	+
MOL006931	isolariciresino	COc1cc2C[C@H](CO)[C@@H](CO)[C@@H](c3ccc(O)c(OC)c3)c2cc1O	Banxia	360.401	Database: TCMSP (http://tcmspnw.com)	250	U.S. Patent Application No. 15/573,583.	1e-06	0.3571	0.104211	N/A	2.02	6	4	5	In domain	+	0.9929	+	0.6071	+	0.8280	-	0.6429	Mitochondria	0.8642	-	0.8533	+	0.8934	+	0.9291	-	0.9800	-	0.8500	-	0.6129	-	0.6963	-	0.7656	+	0.5126	-	0.6000	+	0.4943	+
kushen_032	Kushenol C	CC(=CC[C@H](Cc1c(O)cc(O)c2C(=O)C(=C(Oc12)c3ccc(O)cc3O)O)C(=C)C)C	Kushen	438.47	Book: Chemical Components of Source Plants in Traditional Chinese Medicine (ISBN: 9787030235534)	250	U.S. Patent Application No. 15/573,583.	1e-06	0.4286	0.102807	N/A	5.08	7	5	6	In domain	+	0.9877	-	0.7800	-	0.3575	-	0.5714	Mitochondria	0.5788	+	0.5767	-	0.3352	+	0.9030	-	0.7200	-	0.9000	+	0.9067	+	0.6063	+	0.5562	+	0.5894	+	0.6262	-	0.8300	-
kushen_012	Isokurarinone	COc1cc(O)ccc1[C@@H]2CC(=O)c3c(O)cc(O)c(C[C@H](CC=C(C)C)C(=C)C)c3O2	Kushen	438.513	Book: Chemical Components of Source Plants in Traditional Chinese Medicine (ISBN: 9787030235534)	250	U.S. Patent Application No. 15/573,583.	1e-06	0.4286	0.102797	N/A	5.61	6	3	7	In domain	+	0.9951	+	0.5000	-	0.3578	-	0.5714	Mitochondria	0.7014	-	0.8594	+	0.8463	+	0.9090	-	0.8800	-	0.9000	+	0.9021	+	0.7638	+	0.5233	+	0.6452	+	0.5973	-	0.7963	+
kushen_048	Leachianone A	COc1cc(O)ccc1[C@@H]2CC(=O)c3c(O)cc(O)c(C[C@@H](CC=C(C)C)C(=C)C)c3O2	Kushen	438.513	Book: Chemical Components of Source Plants in Traditional Chinese Medicine (ISBN: 9787030235534)	250	U.S. Patent Application No. 15/573,583.	1e-06	0.4286	0.102797	N/A	5.61	6	3	7	In domain	+	0.9951	+	0.5000	-	0.3578	-	0.5714	Mitochondria	0.7014	-	0.8594	+	0.8463	+	0.9090	-	0.8800	-	0.9000	+	0.9021	+	0.7638	+	0.5233	+	0.6452	+	0.5973	-	0.7963	+
MOL005001	Gancaonin H	CC(=CCc1c(O)cc2OC=C(C(=O)c2c1O)c3cc(O)c4OC(C)(C)C=Cc4c3)C	Gancao	420.454	Database: TCMSP (http://tcmspnw.com)	167	U.S. Patent Application No. 15/573,583.	1e-06	0.6143	0.102648	N/A	5.27	6	3	3	In domain	+	0.9677	-	0.6907	+	0.7881	+	0.6143	Mitochondria	0.6356	-	0.7029	+	0.9127	+	0.9232	-	0.9000	-	0.9500	+	0.9263	+	0.7398	-	0.5973	+	0.6494	-	0.5948	-	0.8144	-
zhishi_014	Tangeretin	COc1ccc(cc1)C2=CC(=O)c3c(OC)c(OC)c(OC)c(OC)c3O2	Zhishi	372.369	Book: Chemical Components of Source Plants in Traditional Chinese Medicine (ISBN: 9787030235534)	167	U.S. Patent Application No. 15/573,583.	1e-06	0.5429	0.102432	N/A	3.50	7	0	6	In domain	+	0.9928	+	0.9313	-	0.2867	+	0.5429	Mitochondria	0.7006	-	1.0000	+	0.9413	+	0.9919	-	0.9600	-	0.9750	+	0.7717	+	0.9512	-	0.9461	-	0.5222	-	1.0000	-	0.7654	+
fuling_010	Eburicoic acid	CC(C)C(=C)CC[C@H]([C@H]1CC[C@@]2(C)C3=C(CC[C@]12C)[C@@]4(C)CC[C@H](O)C(C)(C)[C@@H]4CC3)C(=O)O	Fuling	470.727	Book: Chemical Components of Source Plants in Traditional Chinese Medicine (ISBN: 9787030235534)	250	U.S. Patent Application No. 15/573,583.	1e-06	0.4571	0.10213	N/A	7.79	2	2	6	In domain	+	0.9853	+	0.6976	-	0.8109	-	0.5429	Mitochondria	0.8114	-	0.5751	+	0.8476	-	0.2423	-	1.0000	-	0.5250	+	0.7899	-	0.5718	-	0.7301	+	0.6454	-	0.8404	-	0.8509	-
MOL002670	Cavidine	COc1cc2CCN3Cc4c5OCOc5ccc4[C@H](C)[C@@H]3c2cc1OC	Banxia	353.412	Database: TCMSP (http://tcmspnw.com)	250	U.S. Patent Application No. 15/573,583.	1e-06	0.3429	0.102046	N/A	3.65	5	0	2	In domain	+	0.9910	+	0.9243	+	0.9939	-	0.6571	Mitochondria	0.5086	-	0.8715	+	0.9370	+	0.9352	-	0.9600	+	0.5500	+	0.8482	+	0.7857	-	0.5327	+	0.6115	-	0.8058	+	0.6675	+
gancao_018	Gancaonin I	COc1cc2oc(cc2c(OC)c1CC=C(C)C)c3ccc(O)cc3O	Gancao	354.396	Book: Chemical Components of Source Plants in Traditional Chinese Medicine (ISBN: 9787030235534)	167	U.S. Patent Application No. 15/573,583.	1e-06	0.5143	0.101956	N/A	5.04	5	2	5	In domain	+	0.9898	+	0.8212	+	0.8955	+	0.5143	Mitochondria	0.6263	-	0.8609	+	0.8510	+	0.8827	-	0.8600	-	0.9500	+	0.7895	+	0.6487	+	0.6419	+	0.5603	-	1.0000	+	0.4182	+
kushen_017	Kosamol Q	C[C@H](CO)[C@H](CC=C(C)C)Cc1c(O)cc(O)c2C(=O)C[C@H](Oc12)c3ccc(O)cc3O	Kushen	442.501	Book: Chemical Components of Source Plants in Traditional Chinese Medicine (ISBN: 9787030235534)	250	U.S. Patent Application No. 15/573,583.	1e-06	0.4286	0.10187	N/A	4.36	7	5	7	In domain	+	0.9904	-	0.6181	-	0.2747	-	0.5714	Mitochondria	0.7793	-	0.7173	+	0.8446	+	0.9395	-	0.9400	-	0.8500	+	0.9081	+	0.6532	+	0.5864	+	0.6058	-	0.7958	-	0.8134	-
gancao_093	2,4,4’-Trihydroxychalcone	Oc1ccc(cc1)C(=O)\C=C\c2ccc(O)cc2O	Gancao	256.253	Book: Chemical Components of Source Plants in Traditional Chinese Medicine (ISBN: 9787030235534)	167	U.S. Patent Application No. 15/573,583.	1e-06	0.3714	0.101826	N/A	2.70	4	3	3	In domain	+	0.9824	+	0.8973	-	0.6924	-	0.6286	Mitochondria	0.7711	-	0.7051	+	0.8787	+	0.9480	-	0.8800	-	0.9838	-	0.7324	-	0.9545	-	0.9143	-	0.6269	-	0.6000	-	0.8075	+
MOL005346	Ginsenoside-Rh3_qt	CC(=CC\C=C(\C)/[C@H]1CC[C@]2(C)[C@@H]1[C@H](O)C[C@@H]3[C@@]4(C)CC[C@H](O)C(C)(C)[C@@H]4CC[C@@]23C)C	Renshen	442.717	Database: TCMSP (http://tcmspnw.com)	250	U.S. Patent Application No. 15/573,583.	1e-06	0.4286	0.101821	N/A	7.31	2	2	3	In domain	+	0.9930	+	0.5087	-	0.6483	-	0.5714	Mitochondria	0.5382	-	0.8596	+	0.8897	+	0.9518	-	1.0000	-	0.6750	+	0.9332	-	0.4792	-	0.8318	+	0.6709	-	0.6499	-	0.6843	-
gancao_096	Uralenneoside	O[C@@H]1CO[C@@H](OC(=O)c2ccc(O)c(O)c2)[C@H](O)[C@H]1O	Gancao	286.235	Book: Chemical Components of Source Plants in Traditional Chinese Medicine (ISBN: 9787030235534)	167	U.S. Patent Application No. 15/573,583.	1e-06	0.4143	0.10169	N/A	-1.31	8	5	2	In domain	+	0.7734	-	0.8410	-	0.4011	-	0.5857	Mitochondria	0.6325	-	1.0000	+	0.9436	+	0.8414	-	0.5400	-	0.8000	-	0.9738	-	0.9476	-	0.9216	-	0.5000	-	1.0000	-	0.8410	-
MOL005285	20(s)-protopanaxadiol	CC(=CCC[C@@](C)(O)[C@H]1CC[C@]2(C)[C@@H]1[C@H](O)C[C@@H]3[C@@]4(C)CC[C@H](O)C(C)(C)[C@@H]4CC[C@@]23C)C	Renshen	460.732	Database: TCMSP (http://tcmspnw.com)	250	U.S. Patent Application No. 15/573,583.	1e-06	0.4429	0.101104	N/A	6.50	3	3	4	In domain	+	0.9896	-	0.5776	-	0.7100	-	0.5571	Mitochondria	0.6200	-	0.5766	+	0.8571	+	0.9583	-	1.0000	-	0.6250	+	0.8440	-	0.5666	-	0.8567	+	0.6714	-	0.5811	-	0.7340	-
MOL004849	3-(2,4-dihydroxyphenyl)-8-(1,1-dimethylprop-2-enyl)-7-hydroxy-5-methoxy-coumarin	COc1cc(O)c(c2OC(=O)C(=Cc12)c3ccc(O)cc3O)C(C)(C)C=C	Gancao	368.38	Database: TCMSP (http://tcmspnw.com)	167	U.S. Patent Application No. 15/573,583.	1e-06	0.5286	0.100813	N/A	4.05	6	3	4	In domain	+	0.9877	+	0.7430	-	0.2931	+	0.5286	Mitochondria	0.7248	+	0.5708	+	0.8707	+	0.8470	-	0.9400	-	0.9250	-	0.5069	-	0.5062	-	0.6688	+	0.6073	-	0.6506	-	0.8395	+
maidong_010	N-[beta-Hydroxy-beta-(4-hydroxyphenyl)]ethyl-4-hydroxy cinnamide	O[C@@H](CNC(=O)\C=C\c1ccc(O)cc1)c2ccc(O)cc2	Maidong	299.321	Book: Chemical Components of Source Plants in Traditional Chinese Medicine (ISBN: 9787030235534)	250	U.S. Patent Application No. 15/573,583.	1e-06	0.2857	0.100388	N/A	1.96	4	4	5	In domain	+	0.9317	+	0.5785	+	0.7663	-	0.7143	Mitochondria	0.7536	-	1.0000	+	0.9215	+	0.9453	-	0.8400	-	0.9250	-	0.8289	-	0.9403	-	0.7895	-	0.6337	-	0.8002	-	0.8282	-
MOL004836	echinatin	COc1cc(O)ccc1\C=C/C(=O)c2ccc(O)cc2	Gancao	270.28	Database: TCMSP (http://tcmspnw.com)	167	U.S. Patent Application No. 15/573,583.	1e-06	0.3857	0.100259	N/A	3.00	4	2	4	In domain	+	0.9853	+	0.9025	+	0.8311	-	0.6143	Mitochondria	0.8857	-	0.8613	+	0.8307	+	0.9877	-	0.9200	-	0.9750	-	0.7369	-	0.8664	-	0.8042	-	0.5325	-	0.6000	-	0.7829	-
renshen_092	cis-9,cis-12-Linoleic acid	CCCCC\C=C/C\C=C/CCCCCCCC(=O)O	Renshen	280.445	Book: Chemical Components of Source Plants in Traditional Chinese Medicine (ISBN: 9787030235534)	167	U.S. Patent Application No. 15/573,583.	1e-06	0.4	0.100207	N/A	5.88	1	1	14	In domain	+	0.9087	+	0.6201	+	0.9646	-	0.6000	Plasma membrane	0.5465	-	0.8511	-	0.6267	-	0.5698	-	0.9600	-	0.9000	-	0.5686	-	0.8702	-	0.9531	-	0.6641	+	0.6276	-	0.8766	-
MOL000779	6-O-E-Feruloylajugol_qt	COc1cc(\C=C\C(=O)O[C@@H]2C[C@](C)(O)[C@H]3[C@H](O)OC=C[C@@H]23)ccc1O	Huanglian	362.374	Database: TCMSP (http://tcmspnw.com)	334	U.S. Patent Application No. 15/573,583.	1e-06	0.2571	0.0996925	N/A	1.58	7	3	4	In domain	+	0.9134	-	0.7537	-	0.4329	-	0.7429	Mitochondria	0.4633	-	1.0000	+	0.9166	+	0.9504	-	0.9200	-	0.9250	+	0.5562	-	0.7590	-	0.7236	+	0.6554	-	1.0000	-	0.8612	+
MOL004864	5,7-dihydroxy-3-(4-methoxyphenyl)-8-(3-methylbut-2-enyl)chromone	COc1ccc(cc1)C2=COc3c(CC=C(C)C)c(O)cc(O)c3C2=O	Gancao	352.38	Database: TCMSP (http://tcmspnw.com)	167	U.S. Patent Application No. 15/573,583.	1e-06	0.5	0.0996886	N/A	4.39	5	2	4	In domain	+	0.9848	+	0.6967	-	0.3187	-	0.5000	Mitochondria	0.7048	-	0.5708	+	0.9291	+	0.8466	-	0.8200	-	0.9000	+	0.8141	+	0.6457	-	0.8768	+	0.5577	-	0.5929	-	0.8145	-
MOL005000	Gancaonin G	COc1cc2OC=C(C(=O)c2c(O)c1CC=C(C)C)c3ccc(O)cc3	Gancao	352.38	Database: TCMSP (http://tcmspnw.com)	167	U.S. Patent Application No. 15/573,583.	1e-06	0.5	0.0996886	N/A	4.39	5	2	4	In domain	+	0.9848	+	0.7427	-	0.3809	-	0.5000	Mitochondria	0.7937	-	0.5714	+	0.9242	+	0.8493	-	0.8200	-	0.9000	+	0.7230	+	0.7402	-	0.6980	+	0.5939	-	0.5929	-	0.8145	-
MOL000500	Vestitol	COc1ccc([C@H]2COc3cc(O)ccc3C2)c(O)c1	Gancao	272.296	Database: TCMSP (http://tcmspnw.com)	167	U.S. Patent Application No. 15/573,583.	1e-06	0.3857	0.0995167	N/A	2.83	4	2	2	In domain	+	0.9943	+	0.8368	-	0.2837	-	0.6143	Mitochondria	0.8652	-	0.8537	+	0.9300	+	0.9870	-	0.9000	-	0.8500	-	0.4595	-	0.8349	+	0.5064	+	0.5701	-	0.6025	+	0.5974	-
gancao_019	Gancaonin P-3'-methylether	COc1cc(ccc1O)C2=C(O)C(=O)c3c(O)c(CC=C(C)C)c(O)cc3O2	Gancao	384.379	Book: Chemical Components of Source Plants in Traditional Chinese Medicine (ISBN: 9787030235534)	167	U.S. Patent Application No. 15/573,583.	1e-06	0.5429	0.099231	N/A	3.80	7	4	4	In domain	+	0.9848	-	0.6957	-	0.2995	+	0.5429	Mitochondria	0.5455	-	0.5510	+	0.9408	+	0.8673	-	0.8200	-	0.9000	+	0.7805	+	0.5920	-	0.7299	+	0.5807	-	0.5929	-	0.8145	-
fuling_029	Poricoic acid H	CC(C)C(=C)CC[C@H]([C@H]1[C@H](O)C[C@@]2(C)C3=C(CC[C@]12C)[C@@](C)(CCC(=O)O)[C@@H](CC3)C(=C)C)C(=O)O	Fuling	500.71	Book: Chemical Components of Source Plants in Traditional Chinese Medicine (ISBN: 9787030235534)	250	U.S. Patent Application No. 15/573,583.	1e-06	0.4714	0.099018	N/A	7.02	3	3	10	In domain	+	0.9853	+	0.4912	-	0.9493	-	0.5286	Mitochondria	0.8561	-	0.7074	+	0.8394	-	0.5674	-	1.0000	-	0.6282	+	0.7920	-	0.4622	-	0.5340	+	0.6786	-	0.8404	-	0.8509	-
gancao_047	Kanzonol k	COc1cc2OC=C(C(=O)c2c(O)c1CC=C(C)C)c3ccc(O)c(CC=C(C)C)c3O	Gancao	436.497	Book: Chemical Components of Source Plants in Traditional Chinese Medicine (ISBN: 9787030235534)	167	U.S. Patent Application No. 15/573,583.	1e-06	0.6143	0.098875	N/A	5.60	6	3	6	In domain	+	0.9848	-	0.5415	-	0.3187	+	0.6143	Mitochondria	0.6805	-	0.5677	+	0.9294	+	0.8442	-	0.8200	-	0.8750	+	0.8517	+	0.7349	-	0.6834	+	0.5844	-	0.5929	-	0.8145	-
MOL013441	citrusin B_qt	COc1cc(ccc1O)[C@H](O)[C@@H](CO)Oc2c(OC)cc(\C=C/CO)cc2OC	Zhishi	406.426	Database: TCMSP (http://tcmspnw.com)	167	U.S. Patent Application No. 15/573,583.	1e-06	0.5714	0.0987747	N/A	1.90	8	4	10	In domain	+	0.9819	+	0.5238	+	0.8555	+	0.5714	Mitochondria	0.6699	-	0.8557	+	0.8666	+	0.9428	-	0.9800	-	0.8750	+	0.6920	+	0.7439	-	0.8014	-	0.5295	-	0.5976	-	0.6936	+
kushen_036	Kushenol G	CC(=C)[C@H](CCC(C)(C)O)Cc1c(O)cc(O)c2C(=O)C(=C(Oc12)c3ccc(O)cc3O)O	Kushen	456.485	Book: Chemical Components of Source Plants in Traditional Chinese Medicine (ISBN: 9787030235534)	250	U.S. Patent Application No. 15/573,583.	1e-06	0.4286	0.0987499	N/A	4.27	8	6	7	In domain	+	0.9802	-	0.7586	+	0.8461	-	0.5714	Mitochondria	0.6266	-	0.5559	-	0.3316	+	0.8947	-	0.6600	-	0.9250	+	0.8595	-	0.4453	+	0.6741	+	0.6133	+	0.6171	-	0.8410	+
kushen_027	Kurarinol	COc1cc(O)c(C[C@@H](CCC(C)(C)O)C(=C)C)c2O[C@@H](CC(=O)c12)c3ccc(O)cc3O	Kushen	456.528	Book: Chemical Components of Source Plants in Traditional Chinese Medicine (ISBN: 9787030235534)	250	U.S. Patent Application No. 15/573,583.	1e-06	0.4286	0.0987405	N/A	4.80	7	4	8	In domain	+	0.9939	-	0.5748	+	0.7900	-	0.5714	Mitochondria	0.7117	-	0.8577	+	0.8521	+	0.8851	-	1.0000	-	0.9500	+	0.9428	+	0.6389	+	0.6691	+	0.6777	-	0.7977	-	0.7688	+
gancao_027	Glycyrol	COc1c(CC=C(C)C)c(O)cc2OC(=O)c3c(oc4cc(O)ccc34)c12	Gancao	366.364	Book: Chemical Components of Source Plants in Traditional Chinese Medicine (ISBN: 9787030235534)	167	U.S. Patent Application No. 15/573,583.	1e-06	0.5143	0.0986259	N/A	4.62	6	2	3	In domain	+	0.9853	+	0.6718	-	0.2906	+	0.5143	Mitochondria	0.7733	-	0.5714	+	0.8527	-	0.2490	-	0.9200	-	0.9000	+	0.6960	+	0.6003	-	0.6048	+	0.5620	-	0.5872	-	0.8213	-
kushen_059	Norkurarinol	CC(=C)[C@H](CCC(C)(C)O)Cc1c(O)cc(O)c2C(=O)C[C@@H](Oc12)c3ccc(O)cc3O	Kushen	442.501	Book: Chemical Components of Source Plants in Traditional Chinese Medicine (ISBN: 9787030235534)	250	U.S. Patent Application No. 15/573,583.	1e-06	0.4143	0.0984716	N/A	4.50	7	5	7	In domain	+	0.9917	-	0.6364	+	0.8069	-	0.5857	Mitochondria	0.7086	-	0.7133	+	0.8407	+	0.9039	-	1.0000	-	0.9250	+	0.7926	-	0.4646	+	0.6473	+	0.6420	-	0.8024	-	0.8198	+
gancao_085	Neouralenol	CC(=CCOc1cc(ccc1O)C2=C(O)C(=O)c3cc(O)c(O)cc3O2)C	Gancao	370.353	Book: Chemical Components of Source Plants in Traditional Chinese Medicine (ISBN: 9787030235534)	167	U.S. Patent Application No. 15/573,583.	1e-06	0.5143	0.0975637	N/A	3.63	7	4	4	In domain	+	0.9862	-	0.8506	-	0.3613	+	0.5143	Mitochondria	0.8448	+	0.5787	+	0.9605	+	0.9515	-	0.8600	-	0.9250	+	0.6603	-	0.5000	-	0.7468	+	0.5685	-	1.0000	-	0.8079	-
maidong_001	6-Aldehydo-isoophiopogone A	Cc1c(O)c(C=O)c(O)c2C(=O)C(=COc12)Cc3ccc4OCOc4c3	Maidong	354.31	Book: Chemical Components of Source Plants in Traditional Chinese Medicine (ISBN: 9787030235534)	250	U.S. Patent Application No. 15/573,583.	1e-06	0.3286	0.0975427	N/A	2.64	7	2	3	In domain	+	0.9591	+	0.5708	-	0.2579	-	0.6714	Mitochondria	0.7319	-	0.7099	+	0.7885	+	0.8630	-	0.7600	-	0.8750	-	0.5216	-	0.6934	-	0.8013	+	0.5427	-	0.5826	-	0.8470	+
maidong_032	Ophiopogonone C	Cc1c(O)c(C=O)c2OC=C(Cc3ccc4OCOc4c3)C(=O)c2c1O	Maidong	354.31	Book: Chemical Components of Source Plants in Traditional Chinese Medicine (ISBN: 9787030235534)	250	U.S. Patent Application No. 15/573,583.	1e-06	0.3286	0.0975427	N/A	2.64	7	2	3	In domain	+	0.9591	+	0.5769	-	0.2579	-	0.6714	Mitochondria	0.7319	-	0.7094	+	0.7708	+	0.8630	-	0.7600	-	0.8750	+	0.6157	-	0.6766	-	0.7808	+	0.5381	-	0.5826	-	0.8470	+
kushen_078	Xanthohumol	COc1cc(O)c(CC=C(C)C)c(O)c1C(=O)\C=C\c2ccc(O)cc2	Kushen	354.396	Book: Chemical Components of Source Plants in Traditional Chinese Medicine (ISBN: 9787030235534)	250	U.S. Patent Application No. 15/573,583.	1e-06	0.3286	0.097519	N/A	4.22	5	3	6	In domain	+	0.9878	+	0.7700	+	0.8219	-	0.6714	Mitochondria	0.7846	-	0.5760	+	0.8684	+	0.8882	-	0.9400	-	0.9500	+	0.8346	+	0.6741	-	0.7055	+	0.5362	-	0.7875	-	0.8322	-
maidong_021	Ophiopogonanone C	Cc1c(O)c(C=O)c2OC[C@@H](Cc3ccc4OCOc4c3)C(=O)c2c1O	Maidong	356.326	Book: Chemical Components of Source Plants in Traditional Chinese Medicine (ISBN: 9787030235534)	250	U.S. Patent Application No. 15/573,583.	1e-06	0.3286	0.0969908	N/A	2.38	7	2	3	In domain	+	0.9827	-	0.5466	+	0.8044	-	0.6714	Mitochondria	0.7005	-	0.7207	+	0.8259	+	0.9067	-	0.8800	-	0.9000	+	0.7168	-	0.6834	-	0.6837	+	0.5512	-	0.6021	-	0.8201	+
MOL004827	Semilicoisoflavone B	CC1(C)Oc2c(O)cc(cc2C=C1)C3=COc4cc(O)cc(O)c4C3=O	Gancao	352.337	Database: TCMSP (http://tcmspnw.com)	167	U.S. Patent Application No. 15/573,583.	1e-06	0.4857	0.0968493	N/A	3.76	6	3	1	In domain	+	0.9718	-	0.5162	+	0.8104	-	0.5143	Mitochondria	0.7393	+	0.5719	+	0.9036	+	0.9439	-	0.8000	-	1.0000	-	0.5100	-	0.5258	-	0.6896	+	0.6412	-	0.6192	-	0.8382	+
MOL006606	kosamol,r	CCOc1cc(O)c(CC[C@@H](CC=C(C)C)C(=C)C)c2O[C@H](CC(=O)c12)c3ccccc3O	Kushen	450.567	Database: TCMSP (http://tcmspnw.com)	250	U.S. Patent Application No. 15/573,583.	1e-06	0.4143	0.096709	N/A	6.68	5	2	9	In domain	+	0.9965	-	0.5474	+	0.8673	-	0.5857	Mitochondria	0.8904	-	1.0000	+	0.8665	+	0.9059	-	0.9200	-	0.8000	+	0.9383	+	0.8656	-	0.5310	+	0.6916	-	0.7880	-	0.7350	-
maidong_012	Isoophiopogonone A	Cc1c(O)cc(O)c2C(=O)C(=COc12)Cc3ccc4OCOc4c3	Maidong	326.3	Book: Chemical Components of Source Plants in Traditional Chinese Medicine (ISBN: 9787030235534)	250	U.S. Patent Application No. 15/573,583.	1e-06	0.3	0.0966974	N/A	2.83	6	2	2	In domain	+	0.9716	+	0.7716	-	0.2579	-	0.7000	Mitochondria	0.7262	-	0.5686	+	0.9035	+	0.8565	-	0.7600	-	0.9500	-	0.5371	-	0.5000	-	0.8781	+	0.5072	-	0.5797	-	0.8467	+
fuling_022	Polyporenic acid C	CC(C)C(=C)CC[C@@H]([C@H]1[C@H](O)C[C@@]2(C)C3=CC[C@H]4C(C)(C)C(=O)CC[C@]4(C)C3=CC[C@]12C)C(=O)O	Fuling	482.695	Book: Chemical Components of Source Plants in Traditional Chinese Medicine (ISBN: 9787030235534)	250	U.S. Patent Application No. 15/573,583.	1e-06	0.4429	0.0965037	N/A	6.74	3	2	6	In domain	+	0.9898	+	0.9313	-	0.9493	-	0.5571	Mitochondria	0.8561	-	0.8596	+	0.8664	-	0.5674	-	0.9800	-	0.6282	+	0.6632	-	0.4391	-	0.5868	+	0.6504	-	1.0000	-	0.8727	-
gancao_017	Gancaonin F	COc1c2C=CC(C)(C)Oc2cc3OC(=O)c4c(oc5cc(O)ccc45)c13	Gancao	364.348	Book: Chemical Components of Source Plants in Traditional Chinese Medicine (ISBN: 9787030235534)	167	U.S. Patent Application No. 15/573,583.	1e-06	0.5	0.0964141	N/A	4.59	6	1	1	In domain	+	0.9737	+	0.6892	+	0.8823	-	0.5000	Mitochondria	0.7832	-	0.5799	+	0.8705	+	0.9125	-	0.9200	-	0.9250	+	0.7830	+	0.7213	-	0.5362	+	0.6099	-	0.6233	-	0.8433	+
MOL006591	Thc-9-cooh	CCCCCc1cc2OC(C)(C)[C@@H]3CCC(=C[C@H]3c2c(O)c1C(=O)O)C	Kushen	358.471	Database: TCMSP (http://tcmspnw.com)	250	U.S. Patent Application No. 15/573,583.	1e-06	0.3286	0.0964105	N/A	5.43	3	2	5	In domain	+	0.9930	+	0.7503	+	0.8826	-	0.6714	Mitochondria	0.6718	-	0.8592	+	0.8332	+	0.9282	-	0.8000	-	0.8000	+	0.7034	-	0.5421	-	0.6464	+	0.6762	+	0.5918	-	0.8728	-
gancao_031	Glycyrrhisotlavone	CC(=CCc1cc(cc(O)c1O)C2=COc3cc(O)cc(O)c3C2=O)C	Gancao	354.353	Book: Chemical Components of Source Plants in Traditional Chinese Medicine (ISBN: 9787030235534)	167	U.S. Patent Application No. 15/573,583.	1e-06	0.4857	0.0962984	N/A	3.79	6	4	3	In domain	+	0.9783	-	0.5223	-	0.3196	-	0.5143	Mitochondria	0.6353	+	0.5799	+	0.9000	+	0.9799	-	0.7000	-	0.9000	+	0.6277	-	0.6561	-	0.7740	+	0.5659	-	0.6039	-	0.8389	-
fuling_007	Dehydroeburicoic Acid	CC(C)C(=C)CC[C@H]([C@H]1CC[C@@]2(C)C3=CC[C@H]4C(C)(C)[C@@H](O)CC[C@]4(C)C3=CC[C@]12C)C(=O)O	Fuling	468.711	Book: Chemical Components of Source Plants in Traditional Chinese Medicine (ISBN: 9787030235534)	250	U.S. Patent Application No. 15/573,583.	1e-06	0.4286	0.096174	N/A	7.57	2	2	6	In domain	+	0.9923	+	0.8946	-	0.8109	-	0.5714	Mitochondria	0.8114	-	1.0000	+	0.8924	-	0.2423	-	0.9800	-	0.5250	+	0.8298	-	0.4812	-	0.6140	+	0.6469	-	0.8398	-	0.8724	-
kushen_038	Kushenol I	COc1cc(O)c(C[C@@H](CC=C(C)C)C(=C)C)c2O[C@@H]([C@@H](O)C(=O)c12)c3ccc(O)cc3O	Kushen	454.512	Book: Chemical Components of Source Plants in Traditional Chinese Medicine (ISBN: 9787030235534)	250	U.S. Patent Application No. 15/573,583.	1e-06	0.4143	0.0958694	N/A	4.58	7	4	7	In domain	+	0.9959	-	0.6782	-	0.2995	-	0.5857	Mitochondria	0.5415	-	0.7160	+	0.8348	+	0.8665	-	0.9600	-	0.9000	+	0.9261	+	0.7117	-	0.5236	+	0.6629	-	1.0000	-	0.7270	-
kushen_043	Kushenol N	COc1cc(O)c(C[C@@H](CC=C(C)C)C(=C)C)c2O[C@@H]([C@@H](O)C(=O)c12)c3ccc(O)cc3O	Kushen	454.512	Book: Chemical Components of Source Plants in Traditional Chinese Medicine (ISBN: 9787030235534)	250	U.S. Patent Application No. 15/573,583.	1e-06	0.4143	0.0958694	N/A	4.58	7	4	7	In domain	+	0.9959	-	0.6782	-	0.2995	-	0.5857	Mitochondria	0.5415	-	0.7160	+	0.8348	+	0.8665	-	0.9600	-	0.9000	+	0.9261	+	0.7117	-	0.5236	+	0.6629	-	1.0000	-	0.7270	-
kushen_057	Neokurarinol	COc1cc(O)ccc1[C@H]2CC(=O)c3c(OC)cc(O)c(C[C@@H](CCC(C)(C)O)C(=C)C)c3O2	Kushen	470.555	Book: Chemical Components of Source Plants in Traditional Chinese Medicine (ISBN: 9787030235534)	250	U.S. Patent Application No. 15/573,583.	1e-06	0.4286	0.0957972	N/A	5.11	7	3	9	In domain	+	0.9939	-	0.5193	+	0.8511	-	0.5714	Mitochondria	0.7838	-	1.0000	+	0.8528	+	0.8692	-	1.0000	-	0.9750	+	0.9372	+	0.7337	+	0.6269	+	0.6689	-	0.7977	-	0.7688	+
fuling_031	Tumulosic acid	CC(C)C(=C)CC[C@H]([C@H]1[C@H](O)C[C@@]2(C)C3=C(CC[C@]12C)[C@@]4(C)CC[C@H](O)C(C)(C)[C@@H]4CC3)C(=O)O	Fuling	486.726	Book: Chemical Components of Source Plants in Traditional Chinese Medicine (ISBN: 9787030235534)	250	U.S. Patent Application No. 15/573,583.	1e-06	0.4429	0.0957044	N/A	6.76	3	3	6	In domain	+	0.9853	+	0.7206	-	0.9493	-	0.5571	Mitochondria	0.8143	-	0.7124	+	0.8397	-	0.4538	-	1.0000	-	0.6500	+	0.7568	-	0.5761	-	0.7496	+	0.6611	-	0.8404	-	0.8509	-
kushen_060	Norkurarinone	CC(=CC[C@@H](Cc1c(O)cc(O)c2C(=O)C[C@H](Oc12)c3ccc(O)cc3O)C(=C)C)C	Kushen	424.486	Book: Chemical Components of Source Plants in Traditional Chinese Medicine (ISBN: 9787030235534)	250	U.S. Patent Application No. 15/573,583.	1e-06	0.3857	0.0955646	N/A	5.31	6	4	6	In domain	+	0.9951	-	0.5808	-	0.4500	-	0.6143	Mitochondria	0.7230	-	0.7137	+	0.8274	+	0.9375	-	0.8800	-	0.9000	+	0.8268	+	0.6061	+	0.5278	+	0.6209	+	0.5973	-	0.7963	-
kushen_066	Sophoraflavanone G	CC(=CC[C@H](Cc1c(O)cc(O)c2C(=O)C[C@H](Oc12)c3ccc(O)cc3O)C(=C)C)C	Kushen	424.486	Book: Chemical Components of Source Plants in Traditional Chinese Medicine (ISBN: 9787030235534)	250	U.S. Patent Application No. 15/573,583.	1e-06	0.3857	0.0955646	N/A	5.31	6	4	6	In domain	+	0.9951	-	0.5808	-	0.4500	-	0.6143	Mitochondria	0.7230	-	0.7137	+	0.8274	+	0.9375	-	0.8800	-	0.9000	+	0.8268	+	0.6061	+	0.5278	+	0.6209	+	0.5973	-	0.7963	-
kushen_041	Kushenol L	CC(=CCc1c(O)c(CC=C(C)C)c2O[C@@H]([C@@H](O)C(=O)c2c1O)c3ccc(O)cc3O)C	Kushen	440.486	Book: Chemical Components of Source Plants in Traditional Chinese Medicine (ISBN: 9787030235534)	250	U.S. Patent Application No. 15/573,583.	1e-06	0.4	0.0955079	N/A	4.20	7	5	5	In domain	+	0.9937	-	0.7108	-	0.3575	-	0.6000	Mitochondria	0.6485	-	0.7033	+	0.8188	+	0.9094	-	0.9400	-	0.8500	+	0.7235	+	0.6383	-	0.6719	+	0.6034	-	1.0000	-	0.7858	-
kushen_037	Kushenol H	COc1cc(O)c(C[C@@H](CCC(C)(C)O)C(=C)C)c2O[C@@H]([C@@H](O)C(=O)c12)c3ccc(O)cc3O	Kushen	472.527	Book: Chemical Components of Source Plants in Traditional Chinese Medicine (ISBN: 9787030235534)	250	U.S. Patent Application No. 15/573,583.	1e-06	0.4286	0.0953973	N/A	3.78	8	5	8	In domain	+	0.9938	-	0.6901	+	0.8281	-	0.5714	Mitochondria	0.6230	-	0.7146	+	0.8396	+	0.8727	-	0.9800	-	0.9250	+	0.9396	+	0.6595	+	0.6064	+	0.6836	-	1.0000	-	0.7607	+
kushen_040	Kushenol k	COc1cc(O)c(C[C@@H](CCC(C)(C)O)C(=C)C)c2O[C@@H]([C@H](O)C(=O)c12)c3ccc(O)cc3O	Kushen	472.527	Book: Chemical Components of Source Plants in Traditional Chinese Medicine (ISBN: 9787030235534)	250	U.S. Patent Application No. 15/573,583.	1e-06	0.4286	0.0953973	N/A	3.78	8	5	8	In domain	+	0.9938	-	0.6901	+	0.8281	-	0.5714	Mitochondria	0.6230	-	0.7146	+	0.8396	+	0.8727	-	0.9800	-	0.9250	+	0.9396	+	0.6595	+	0.6064	+	0.6836	-	1.0000	-	0.7607	+
renshen_023	Deoxygomisin A	COc1cc2C[C@@H](C)[C@@H](C)Cc3cc4OCOc4c(OC)c3c2c(OC)c1OC	Renshen	400.465	Book: Chemical Components of Source Plants in Traditional Chinese Medicine (ISBN: 9787030235534)	167	U.S. Patent Application No. 15/573,583.	1e-06	0.5429	0.0952451	N/A	4.49	6	0	4	In domain	+	0.9909	+	0.9407	+	0.9306	+	0.5429	Mitochondria	0.5357	-	1.0000	+	0.9315	+	0.9570	-	0.9400	-	0.9000	+	0.9296	+	0.6640	-	0.8579	+	0.5330	-	0.8176	+	0.4065	+
MOL005348	Ginsenoside-Rh4_qt	CC(=CC\C=C(\C)/[C@H]1CC[C@]2(C)[C@@H]1[C@H](O)C[C@@H]3[C@@]4(C)CC[C@H](O)C(C)(C)[C@H]4[C@H](O)C[C@@]23C)C	Renshen	458.716	Database: TCMSP (http://tcmspnw.com)	250	U.S. Patent Application No. 15/573,583.	1e-06	0.4143	0.0949908	N/A	6.28	3	3	3	In domain	+	0.9930	-	0.5807	-	0.7100	-	0.5857	Mitochondria	0.6200	-	0.8577	+	0.8854	+	0.9583	-	1.0000	-	0.6250	+	0.8262	-	0.5096	-	0.6811	+	0.6791	-	0.6499	-	0.6843	-
MOL004898	(E)-3-[3,4-dihydroxy-5-(3-methylbut-2-enyl)phenyl]-1-(2,4-dihydroxyphenyl)prop-2-en-1-one	CC(=CCc1cc(\C=C\C(=O)c2ccc(O)cc2O)cc(O)c1O)C	Gancao	340.37	Database: TCMSP (http://tcmspnw.com)	167	U.S. Patent Application No. 15/573,583.	1e-06	0.4571	0.0943512	N/A	3.91	5	4	5	In domain	+	0.9822	+	0.6403	+	0.7713	-	0.5429	Mitochondria	0.7352	+	0.5743	+	0.8881	+	0.9653	-	0.8000	-	0.9088	+	0.9008	-	0.7032	-	0.7897	-	0.5447	-	0.7875	-	0.8529	-
gancao_008	3,3'-Dimethylquercetin	COC1=C(Oc2cc(O)cc(O)c2C1=O)c3ccc(O)c(OC)c3	Gancao	330.289	Book: Chemical Components of Source Plants in Traditional Chinese Medicine (ISBN: 9787030235534)	167	U.S. Patent Application No. 15/573,583.	1e-06	0.4429	0.0942104	N/A	2.59	7	3	3	In domain	+	0.9889	+	0.7029	-	0.3998	-	0.5571	Mitochondria	0.6642	+	0.5707	+	0.9307	+	0.9261	+	0.5400	-	0.9750	-	0.5499	-	0.4615	-	0.8434	+	0.5545	-	0.6401	-	0.8296	+
MOL004941	(2R)-7-hydroxy-2-(4-hydroxyphenyl)chroman-4-one	Oc1ccc(cc1)[C@H]2CC(=O)c3ccc(O)cc3O2	Gancao	256.253	Database: TCMSP (http://tcmspnw.com)	167	U.S. Patent Application No. 15/573,583.	1e-06	0.3429	0.0940124	N/A	2.80	4	2	1	In domain	+	0.9947	-	0.7591	-	0.6880	-	0.6571	Mitochondria	0.8241	-	0.6348	+	0.8593	+	0.9756	-	0.9800	-	0.9500	-	0.8490	-	0.9166	-	0.9037	-	0.5451	-	1.0000	+	0.3531	+
gancao_094	Uralene	COC1=C(Oc2ccc(O)c(O)c2C1=O)c3cc(O)c(O)cc3CC=C(C)C	Gancao	384.379	Book: Chemical Components of Source Plants in Traditional Chinese Medicine (ISBN: 9787030235534)	167	U.S. Patent Application No. 15/573,583.	1e-06	0.5143	0.0940035	N/A	3.80	7	4	4	In domain	+	0.9786	+	0.5424	-	0.3140	+	0.5143	Mitochondria	0.7257	+	0.5787	+	0.9005	+	0.9518	-	0.7800	-	0.9250	+	0.7549	-	0.4696	-	0.7874	+	0.5443	-	0.6117	-	0.8228	-
MOL004980	Inflacoumarin A	CC(=CCc1cc2C(=CC(=O)Oc2cc1O)c3ccc(O)cc3)C	Gancao	322.355	Database: TCMSP (http://tcmspnw.com)	167	U.S. Patent Application No. 15/573,583.	1e-06	0.4286	0.0934127	N/A	4.38	4	2	3	In domain	+	0.9869	+	0.7708	-	0.7576	-	0.5714	Mitochondria	0.8359	-	0.5673	+	0.9046	+	0.8818	-	0.8800	-	0.9250	+	0.8361	-	0.5371	-	0.7580	-	0.5000	-	0.5872	-	0.8258	-
kushen_023	Kosamol W	COc1cc(ccc1O)[C@@H]2CC(=O)c3c(O)cc(O)c(CC=C(C)C)c3O2	Kushen	370.396	Book: Chemical Components of Source Plants in Traditional Chinese Medicine (ISBN: 9787030235534)	250	U.S. Patent Application No. 15/573,583.	1e-06	0.3286	0.0933066	N/A	4.03	6	3	4	In domain	+	0.9942	+	0.8458	-	0.3654	-	0.6714	Mitochondria	0.5708	-	0.7207	+	0.9067	+	0.9251	-	0.9600	-	0.9000	+	0.7892	-	0.4740	-	0.7954	+	0.5577	-	0.7977	-	0.7912	-
fuling_032	Tumulosic acid methyl ester	COC(=O)[C@H](CCC(=C)C(C)C)[C@H]1[C@H](O)C[C@@]2(C)C3=C(CC[C@]12C)[C@@]4(C)CC[C@H](O)C(C)(C)[C@@H]4CC3	Fuling	500.753	Book: Chemical Components of Source Plants in Traditional Chinese Medicine (ISBN: 9787030235534)	250	U.S. Patent Application No. 15/573,583.	1e-06	0.4429	0.0930236	N/A	6.85	4	2	6	In domain	+	0.9896	+	0.5895	-	0.8156	-	0.5571	Mitochondria	0.8277	-	0.7115	+	0.8561	-	0.6080	-	0.9600	-	0.7500	+	0.8741	-	0.4779	-	0.6364	+	0.7024	-	1.0000	-	0.8465	-
gancao_024	Glyurallin B	CC(=CCc1cc(cc(O)c1O)C2=COc3c(CC=C(C)C)c(O)cc(O)c3C2=O)C	Gancao	422.47	Book: Chemical Components of Source Plants in Traditional Chinese Medicine (ISBN: 9787030235534)	167	U.S. Patent Application No. 15/573,583.	1e-06	0.5571	0.0926455	N/A	5.30	6	4	5	In domain	+	0.9783	-	0.7298	-	0.3196	+	0.5571	Mitochondria	0.5980	+	0.5782	+	0.8926	+	0.9716	-	0.7000	-	0.9000	+	0.8396	-	0.4631	-	0.8062	+	0.5365	-	0.6039	-	0.8389	-
fuling_021	Pinicolic acid A	CC(=CCC[C@H]([C@H]1CC[C@@]2(C)C3=C(CC[C@]12C)[C@@]4(C)CCC(=O)C(C)(C)[C@@H]4CC3)C(=O)O)C	Fuling	454.684	Book: Chemical Components of Source Plants in Traditional Chinese Medicine (ISBN: 9787030235534)	250	U.S. Patent Application No. 15/573,583.	1e-06	0.4	0.0925253	N/A	7.75	2	1	5	In domain	+	0.9821	+	0.6355	-	0.3596	-	0.6000	Mitochondria	0.8852	-	1.0000	+	0.7464	-	0.2829	-	0.9000	+	0.6000	+	0.9317	+	0.5817	-	0.7328	+	0.6419	-	0.6106	-	0.8683	-
MOL004820	kanzonols W	CC1(C)Oc2ccc3C=C(C(=O)Oc3c2C=C1)c4ccc(O)cc4O	Gancao	336.338	Database: TCMSP (http://tcmspnw.com)	167	U.S. Patent Application No. 15/573,583.	1e-06	0.4429	0.092516	N/A	4.06	5	2	1	In domain	+	0.9768	+	0.7512	-	0.3329	-	0.5571	Mitochondria	0.8030	+	0.5629	+	0.8316	+	0.8807	-	0.9400	-	0.9750	+	0.6430	-	0.5147	-	0.6517	+	0.5592	-	0.6435	-	0.8312	+
kushen_028	Kurarinone	COc1cc(O)c(C[C@H](CC=C(C)C)C(=C)C)c2O[C@@H](CC(=O)c12)c3ccc(O)cc3O	Kushen	438.513	Book: Chemical Components of Source Plants in Traditional Chinese Medicine (ISBN: 9787030235534)	250	U.S. Patent Application No. 15/573,583.	1e-06	0.3857	0.0925078	N/A	5.61	6	3	7	In domain	+	0.9965	+	0.5065	-	0.3578	-	0.6143	Mitochondria	0.7014	-	0.8596	+	0.8461	+	0.9090	-	0.9200	-	0.9000	+	0.9205	+	0.7046	+	0.5598	+	0.6629	-	0.7880	-	0.7350	+
MOL006607	kurarainone	COc1cc(O)c(C[C@H](CC=C(C)C)C(=C)C)c2O[C@H](CC(=O)c12)c3ccc(O)cc3O	Kushen	438.513	Database: TCMSP (http://tcmspnw.com)	250	U.S. Patent Application No. 15/573,583.	1e-06	0.3857	0.0925078	N/A	5.61	6	3	7	In domain	+	0.9965	+	0.5065	-	0.3578	-	0.6143	Mitochondria	0.7014	-	0.8596	+	0.8461	+	0.9090	-	0.9200	-	0.9000	+	0.9205	+	0.7046	+	0.5598	+	0.6629	-	0.7880	-	0.7350	+
fuling_030	Trametenolic acid	CC(=CCC[C@H]([C@H]1CC[C@@]2(C)C3=C(CC[C@]12C)[C@@]4(C)CC[C@H](O)C(C)(C)[C@@H]4CC3)C(=O)O)C	Fuling	456.7	Book: Chemical Components of Source Plants in Traditional Chinese Medicine (ISBN: 9787030235534)	250	U.S. Patent Application No. 15/573,583.	1e-06	0.4	0.0921169	N/A	7.54	2	2	5	In domain	+	0.9853	+	0.6416	-	0.8109	-	0.6000	Mitochondria	0.8408	-	0.7219	+	0.7828	+	0.9147	-	1.0000	+	0.5500	+	0.9522	-	0.5246	-	0.7811	+	0.6414	-	0.8404	-	0.8509	-
MOL000275	trametenolic acid	CC(=CCC[C@H]([C@H]1CC[C@@]2(C)C3=C(CC[C@]12C)[C@@]4(C)CC[C@H](O)C(C)(C)[C@H]4CC3)C(=O)O)C	Fuling	456.7	Database: TCMSP (http://tcmspnw.com)	250	U.S. Patent Application No. 15/573,583.	1e-06	0.4	0.0921169	N/A	7.54	2	2	5	In domain	+	0.9853	+	0.6416	-	0.8109	-	0.6000	Mitochondria	0.8408	-	0.7219	+	0.7828	+	0.9147	-	1.0000	+	0.5500	+	0.9522	-	0.5246	-	0.7811	+	0.6414	-	0.8404	-	0.8509	-
MOL006612	kurarinone	COc1cc(O)c(C[C@@H](C=C(C)C)C(=C)C)c(O)c1C(=O)\C=C\c2ccc(O)cc2O	Kushen	424.486	Database: TCMSP (http://tcmspnw.com)	250	U.S. Patent Application No. 15/573,583.	1e-06	0.3714	0.0920215	N/A	5.11	6	4	8	In domain	+	0.9896	-	0.6095	+	0.8219	-	0.6286	Mitochondria	0.7487	-	0.5685	+	0.8129	+	0.8782	-	0.9200	-	0.9250	+	0.9597	+	0.6778	+	0.5068	+	0.6251	-	0.7819	-	0.8424	+
fuling_020	Pachymic acid methyl ester	COC(=O)[C@H](CCC(=C)C(C)C)[C@H]1[C@H](O)C[C@@]2(C)C3=C(CC[C@]12C)[C@@]4(C)CC[C@H](OC(=O)C)C(C)(C)[C@@H]4CC3	Fuling	542.79	Book: Chemical Components of Source Plants in Traditional Chinese Medicine (ISBN: 9787030235534)	250	U.S. Patent Application No. 15/573,583.	1e-06	0.4714	0.0913417	N/A	7.42	5	1	7	In domain	+	0.9896	-	0.7712	-	0.4885	-	0.5286	Mitochondria	0.8327	-	0.7126	+	0.7214	-	0.4690	-	0.9600	-	0.6750	+	0.9205	+	0.6990	-	0.5489	+	0.7168	-	1.0000	-	0.8465	-
renshen_091	3,5,7,4'-Tetrahydroxyflavone	OC1=C(Oc2cc(O)cc(O)c2C1=O)c3ccc(O)cc3	Renshen	286.236	Book: Chemical Components of Source Plants in Traditional Chinese Medicine (ISBN: 9787030235534)	167	U.S. Patent Application No. 15/573,583.	1e-06	0.3714	0.09116	N/A	2.28	6	4	1	In domain	+	0.9881	-	0.8637	-	0.5635	-	0.6286	Mitochondria	0.6122	+	0.5370	+	0.7318	-	0.5697	+	0.6600	-	0.9750	-	0.5434	-	0.8576	-	0.7327	+	0.5231	-	0.6443	-	0.8503	+
gancao_034	Glyurallin A	COc1c(CC=C(C)C)c(O)cc2OCc3c(oc4cc(O)ccc34)c12	Gancao	352.38	Book: Chemical Components of Source Plants in Traditional Chinese Medicine (ISBN: 9787030235534)	167	U.S. Patent Application No. 15/573,583.	1e-06	0.4571	0.0911353	N/A	4.92	5	2	3	In domain	+	0.9898	+	0.6623	+	0.8693	-	0.5429	Mitochondria	0.7839	-	0.7163	+	0.8956	+	0.9193	-	0.8600	-	0.9250	+	0.9283	+	0.6520	+	0.5585	+	0.5785	-	1.0000	+	0.4182	-
renshen_107	Nonacosane	CCCCCCCCCCCCCCCCCCCCCCCCCCCCC	Renshen	408.787	Book: Chemical Components of Source Plants in Traditional Chinese Medicine (ISBN: 9787030235534)	167	U.S. Patent Application No. 15/573,583.	1e-06	0.5286	0.0908485	N/A	11.56	0	0	26	Warning	+	0.8865	+	0.6268	+	1.0000	+	0.5286	Lysosomes	0.5981	-	0.8503	+	0.9552	+	0.9429	-	0.9600	-	0.8000	-	0.6098	-	0.8072	-	0.9516	-	0.7947	-	0.8415	-	0.7215	-
MOL004848	licochalcone G	COc1cc(O)c(cc1\C=C\C(=O)c2ccc(O)cc2O)C(C)(C)C=C	Gancao	354.396	Database: TCMSP (http://tcmspnw.com)	167	U.S. Patent Application No. 15/573,583.	1e-06	0.4571	0.0906169	N/A	4.17	5	3	6	In domain	+	0.9874	+	0.7695	+	0.8804	-	0.5429	Mitochondria	0.8472	-	0.5708	+	0.8657	+	0.9254	-	0.9200	-	0.9750	+	0.7691	-	0.5000	-	0.7273	+	0.5672	-	0.8002	-	0.8562	+
MOL004966	3'-Hydroxy-4'-O-Methylglabridin	COc1ccc([C@@H]2COc3c(C2)ccc4OC(C)(C)C=Cc34)c(O)c1O	Gancao	354.396	Database: TCMSP (http://tcmspnw.com)	167	U.S. Patent Application No. 15/573,583.	1e-06	0.4571	0.0906169	N/A	4.01	5	2	2	In domain	+	0.9921	+	0.7287	+	0.8220	-	0.5429	Mitochondria	0.8020	-	0.8594	+	0.9065	+	0.9741	-	0.8800	-	0.9000	+	0.7600	-	0.5809	+	0.6020	+	0.6617	+	0.5928	+	0.3469	-
MOL004811	Glyasperin C	COc1c(CC=C(C)C)c(O)cc2OC[C@H](Cc12)c3ccc(O)cc3O	Gancao	356.412	Database: TCMSP (http://tcmspnw.com)	167	U.S. Patent Application No. 15/573,583.	1e-06	0.4571	0.0901044	N/A	4.04	5	3	4	In domain	+	0.9959	+	0.7677	+	0.8017	-	0.5429	Mitochondria	0.7468	-	0.8537	+	0.8951	+	0.9224	-	0.9400	-	0.8750	+	0.8149	-	0.4755	+	0.5995	+	0.6134	-	0.6036	+	0.4888	-
renshen_084	Hexadecanoic acid	CCCCCCCCCCCCCCCC(=O)O	Renshen	256.424	Book: Chemical Components of Source Plants in Traditional Chinese Medicine (ISBN: 9787030235534)	167	U.S. Patent Application No. 15/573,583.	1e-06	0.3286	0.0900318	N/A	5.55	1	1	14	In domain	+	0.8417	+	0.7107	+	0.9725	-	0.6714	Mitochondria	0.5152	-	0.8483	+	0.8902	-	0.3662	-	1.0000	-	0.9250	-	0.5744	-	0.9326	-	0.9647	-	0.7568	+	0.6720	-	0.8901	-
fuling_016	25-Hydroxy-3-epidehydrotumulosic acid	CC(C)(O)C(=C)CC[C@H]([C@H]1[C@H](O)C[C@@]2(C)C3=CC[C@H]4C(C)(C)[C@H](O)CC[C@]4(C)C3=CC[C@]12C)C(=O)O	Fuling	500.71	Book: Chemical Components of Source Plants in Traditional Chinese Medicine (ISBN: 9787030235534)	250	U.S. Patent Application No. 15/573,583.	1e-06	0.4286	0.0900279	N/A	5.65	4	4	6	In domain	+	0.9895	+	0.7783	-	0.9493	-	0.5714	Mitochondria	0.8143	-	0.8588	+	0.8686	-	0.4538	-	0.9800	-	0.6500	+	0.7167	-	0.5000	-	0.5839	+	0.6863	-	0.8203	-	0.8840	-
fuling_008	Dehydrotumulosic acid	CC(C)C(=C)CC[C@H]([C@H]1[C@H](O)C[C@@]2(C)C3=CC[C@H]4C(C)(C)[C@@H](O)CC[C@]4(C)C3=CC[C@]12C)C(=O)O	Fuling	484.71	Book: Chemical Components of Source Plants in Traditional Chinese Medicine (ISBN: 9787030235534)	250	U.S. Patent Application No. 15/573,583.	1e-06	0.4143	0.0898966	N/A	6.54	3	3	6	In domain	+	0.9923	+	0.9312	-	0.9493	-	0.5857	Mitochondria	0.8143	-	0.8599	+	0.8836	-	0.4538	-	0.9800	-	0.6500	+	0.7618	-	0.5088	-	0.6160	+	0.6515	-	0.8398	-	0.8724	-
fuling_011	3-Epidehydrotumulosic acid	CC(C)C(=C)CC[C@H]([C@H]1[C@H](O)C[C@@]2(C)C3=CC[C@H]4C(C)(C)[C@H](O)CC[C@]4(C)C3=CC[C@]12C)C(=O)O	Fuling	484.71	Book: Chemical Components of Source Plants in Traditional Chinese Medicine (ISBN: 9787030235534)	250	U.S. Patent Application No. 15/573,583.	1e-06	0.4143	0.0898966	N/A	6.54	3	3	6	In domain	+	0.9923	+	0.9312	-	0.9493	-	0.5857	Mitochondria	0.8143	-	0.8599	+	0.8836	-	0.4538	-	0.9800	-	0.6500	+	0.7618	-	0.5088	-	0.6160	+	0.6515	-	0.8398	-	0.8724	-
kushen_054	2'-Methoxykurarinone	COc1cc(O)ccc1[C@@H]2CC(=O)c3c(OC)cc(O)c(C[C@@H](CC=C(C)C)C(=C)C)c3O2	Kushen	452.539	Book: Chemical Components of Source Plants in Traditional Chinese Medicine (ISBN: 9787030235534)	250	U.S. Patent Application No. 15/573,583.	1e-06	0.3857	0.0896405	N/A	5.91	6	2	8	In domain	+	0.9965	+	0.5375	-	0.3803	-	0.6143	Mitochondria	0.8008	-	1.0000	+	0.8466	+	0.8539	-	0.9200	-	0.9000	+	0.9476	+	0.8228	+	0.5112	+	0.6536	-	0.7880	-	0.7350	-
gancao_089	beta-Sitosterol	CC[C@@H](CC[C@@H](C)[C@H]1CC[C@H]2[C@@H]3CC=C4C[C@@H](O)CC[C@]4(C)[C@H]3CC[C@]12C)C(C)C	Gancao	414.707	Book: Chemical Components of Source Plants in Traditional Chinese Medicine (ISBN: 9787030235534)	167	U.S. Patent Application No. 15/573,583.	1e-06	0.5286	0.0895516	N/A	8.02	1	1	6	In domain	+	0.9930	+	0.5385	+	0.9247	+	0.5286	Lysosomes	0.4691	-	0.5873	+	0.9413	+	0.9820	-	1.0000	-	0.8750	+	0.7587	-	0.5000	+	0.8270	+	0.7187	-	0.6499	-	0.6843	-
MOL000359	sitosterol	CC[C@H](CC[C@@H](C)[C@H]1CC[C@H]2[C@@H]3CC=C4C[C@H](O)CC[C@]4(C)[C@H]3CC[C@]12C)C(C)C	Gancao	414.707	Database: TCMSP (http://tcmspnw.com)	167	U.S. Patent Application No. 15/573,583.	1e-06	0.5286	0.0895516	N/A	8.02	1	1	6	In domain	+	0.9930	+	0.5385	+	0.9247	+	0.5286	Lysosomes	0.4691	-	0.5873	+	0.9413	+	0.9820	-	1.0000	-	0.8750	+	0.7587	-	0.5000	+	0.8270	+	0.7187	-	0.6499	-	0.6843	-
renshen_141	beta-Sitosterol	CC[C@@H](CC[C@@H](C)[C@H]1CC[C@H]2[C@@H]3CC=C4C[C@@H](O)CC[C@]4(C)[C@H]3CC[C@]12C)C(C)C	Renshen	414.707	Book: Chemical Components of Source Plants in Traditional Chinese Medicine (ISBN: 9787030235534)	167	U.S. Patent Application No. 15/573,583.	1e-06	0.5286	0.0895516	N/A	8.02	1	1	6	In domain	+	0.9930	+	0.5385	+	0.9247	+	0.5286	Lysosomes	0.4691	-	0.5873	+	0.9413	+	0.9820	-	1.0000	-	0.8750	+	0.7587	-	0.5000	+	0.8270	+	0.7187	-	0.6499	-	0.6843	-
MOL005017	Phaseol	CC(=CCc1c(O)ccc2c1OC(=O)c3c2oc4cc(O)ccc34)C	Gancao	336.338	Database: TCMSP (http://tcmspnw.com)	167	U.S. Patent Application No. 15/573,583.	1e-06	0.4286	0.0895289	N/A	4.61	5	2	2	In domain	+	0.9839	-	0.6324	-	0.3617	-	0.5714	Mitochondria	0.8383	-	0.5651	+	0.8514	+	0.9059	-	0.8800	-	0.9500	+	0.8204	-	0.5353	-	0.7121	-	0.5000	-	0.5505	-	0.8400	-
gancao_097	Uralenol	CC(=CCc1cc(cc(O)c1O)C2=C(O)C(=O)c3c(O)cc(O)cc3O2)C	Gancao	370.353	Book: Chemical Components of Source Plants in Traditional Chinese Medicine (ISBN: 9787030235534)	167	U.S. Patent Application No. 15/573,583.	1e-06	0.4714	0.0894255	N/A	3.50	7	5	3	In domain	+	0.9783	+	0.5166	-	0.3196	-	0.5286	Mitochondria	0.6353	-	0.5294	+	0.8036	+	0.9799	-	0.7000	-	0.9000	+	0.8097	-	0.6493	-	0.6048	+	0.5602	-	0.6039	-	0.8389	-
renshen_070	Ginsenoyne A	O[C@H](C=C)C#CC#CC[C@H]1O[C@H]1CCCCCC=C	Renshen	258.355	Book: Chemical Components of Source Plants in Traditional Chinese Medicine (ISBN: 9787030235534)	167	U.S. Patent Application No. 15/573,583.	1e-06	0.3286	0.0893588	N/A	2.83	2	1	8	In domain	+	0.8958	-	0.5543	+	0.9747	-	0.6714	Plasma membrane	0.5397	-	0.8586	+	0.8974	+	0.9468	-	0.9600	-	0.7750	-	0.9454	-	0.9019	-	0.8226	+	0.5297	-	1.0000	-	0.7342	-
gancao_005	1-(3-(3-Methyl-2-butenyl)-2,4-(dihydroxy)phenyl)-3-(2,2-dimethyl-8-hydroxy-2H-benzopyran-6-yl)-2-propen-1-one	CC(=CCc1c(O)ccc(C(=O)\C=C\c2cc(O)c3OC(C)(C)C=Cc3c2)c1O)C	Gancao	406.471	Book: Chemical Components of Source Plants in Traditional Chinese Medicine (ISBN: 9787030235534)	167	U.S. Patent Application No. 15/573,583.	1e-06	0.5143	0.0888944	N/A	5.39	5	3	5	In domain	+	0.9873	-	0.5857	+	0.7701	+	0.5143	Mitochondria	0.5555	-	0.5709	+	0.8590	+	0.9508	-	0.9600	-	0.9500	+	0.9412	+	0.7216	-	0.6310	+	0.5921	-	0.8038	-	0.8304	-
gancao_015	Gancaonin D	COc1ccc(cc1O)C2=COc3c(C\C=C(/C)\CO)c(O)cc(O)c3C2=O	Gancao	384.379	Book: Chemical Components of Source Plants in Traditional Chinese Medicine (ISBN: 9787030235534)	167	U.S. Patent Application No. 15/573,583.	1e-06	0.4857	0.088776	N/A	3.07	7	4	5	In domain	+	0.9774	-	0.6425	-	0.4147	-	0.5143	Mitochondria	0.5943	+	0.5789	+	0.9187	+	0.9451	-	0.7800	-	0.8564	+	0.7158	-	0.4865	-	0.6936	+	0.5932	-	0.5948	-	0.8189	-
gancao_098	Uralenol-3-methylether	COC1=C(Oc2cc(O)cc(O)c2C1=O)c3cc(O)c(O)c(CC=C(C)C)c3	Gancao	384.379	Book: Chemical Components of Source Plants in Traditional Chinese Medicine (ISBN: 9787030235534)	167	U.S. Patent Application No. 15/573,583.	1e-06	0.4857	0.088776	N/A	3.80	7	4	4	In domain	+	0.9786	+	0.6762	-	0.3144	-	0.5143	Mitochondria	0.5625	-	0.5527	+	0.8570	+	0.9571	-	0.7800	-	0.8750	+	0.8456	+	0.5819	-	0.6539	+	0.5798	-	0.6117	-	0.8228	-
kushen_035	Kushenol F	CC(=CC[C@@H](Cc1c(O)cc2O[C@@H](CC(=O)c2c1O)c3ccc(O)cc3O)C(=C)C)C	Kushen	424.486	Book: Chemical Components of Source Plants in Traditional Chinese Medicine (ISBN: 9787030235534)	250	U.S. Patent Application No. 15/573,583.	1e-06	0.3571	0.0884784	N/A	5.31	6	4	6	In domain	+	0.9951	-	0.6883	-	0.4500	-	0.6429	Mitochondria	0.7230	-	0.5747	+	0.8359	+	0.9375	-	0.8800	-	0.9000	+	0.6406	-	0.4601	+	0.5129	+	0.6344	+	0.5973	-	0.7963	-
MOL004835	Glypallichalcone	COc1ccc(cc1)C(=O)\C=C\c2ccc(O)cc2OC	Gancao	284.307	Database: TCMSP (http://tcmspnw.com)	167	U.S. Patent Application No. 15/573,583.	1e-06	0.3571	0.088245	N/A	3.31	4	1	5	In domain	+	0.9853	+	0.9340	+	0.9406	-	0.6429	Mitochondria	0.8978	-	1.0000	+	0.8562	+	0.9897	-	0.9200	-	0.9750	-	0.6598	-	0.6925	-	0.8292	+	0.5062	-	0.6000	-	0.7829	+
MOL004810	glyasperin F	CC1(C)Oc2c(C=C1)c(O)ccc2[C@@H]3COc4cc(O)cc(O)c4C3=O	Gancao	354.353	Database: TCMSP (http://tcmspnw.com)	167	U.S. Patent Application No. 15/573,583.	1e-06	0.4429	0.0878125	N/A	3.35	6	3	1	In domain	+	0.9864	+	0.6425	+	0.8340	-	0.5571	Mitochondria	0.8497	-	0.5758	+	0.9242	+	0.9290	-	0.9200	-	1.0000	+	0.6161	-	0.5836	-	0.5428	+	0.6218	+	0.5981	-	0.8360	+
MOL004985	icos-5-enoic acid	CCCCCCCCCCCCCC\C=C\CCCC(=O)O	Gancao	310.515	Database: TCMSP (http://tcmspnw.com)	167	U.S. Patent Application No. 15/573,583.	1e-06	0.3857	0.087268	N/A	6.89	1	1	17	In domain	+	0.9087	+	0.5000	+	0.9646	-	0.6143	Plasma membrane	0.5465	-	0.8513	-	0.4537	-	0.5698	-	0.9600	-	0.9000	-	0.5000	-	0.8648	-	0.9673	-	0.6797	+	0.6276	-	0.8766	-
MOL004996	gadelaidic acid	CCCCCCCCCC\C=C\CCCCCCCC(=O)O	Gancao	310.515	Database: TCMSP (http://tcmspnw.com)	167	U.S. Patent Application No. 15/573,583.	1e-06	0.3857	0.087268	N/A	6.89	1	1	17	In domain	+	0.9087	+	0.5677	+	0.9646	-	0.6143	Plasma membrane	0.5465	-	0.8514	-	0.3622	-	0.5698	-	0.9600	-	0.9000	-	0.5327	-	0.8251	-	0.9649	-	0.6902	+	0.6276	-	0.8766	-
gancao_006	1-(3-(3-Methyl-2-butenyl)-2,4-(dihydroxy)phenyl)-3-[4-hydroxy-3-(3-methyl-2-butenyl)phenyl]-2-propen-l-one	CC(=CCc1cc(\C=C\C(=O)c2ccc(O)c(CC=C(C)C)c2O)ccc1O)C	Gancao	392.487	Book: Chemical Components of Source Plants in Traditional Chinese Medicine (ISBN: 9787030235534)	167	U.S. Patent Application No. 15/573,583.	1e-06	0.4857	0.086942	N/A	5.72	4	3	7	In domain	+	0.9875	-	0.5517	-	0.3151	-	0.5143	Mitochondria	0.7934	+	0.5694	+	0.9080	+	0.9138	-	0.8800	-	0.9500	+	0.9353	+	0.6968	-	0.8738	-	0.5654	-	0.7861	-	0.8509	+
MOL004808	glyasperin B	COc1cc2OC[C@H](C(=O)c2c(O)c1CC=C(C)C)c3ccc(O)cc3O	Gancao	370.396	Database: TCMSP (http://tcmspnw.com)	167	U.S. Patent Application No. 15/573,583.	1e-06	0.4571	0.0867027	N/A	3.68	6	3	4	In domain	+	0.9951	+	0.6239	-	0.3163	-	0.5429	Mitochondria	0.7651	-	0.7189	+	0.8901	+	0.8986	-	0.8800	-	0.9000	+	0.7148	-	0.5491	+	0.5331	+	0.6174	+	0.5973	-	0.7963	-
MOL004385	Yinyanghuo D	CC(=CCc1cc(ccc1O)C2=CC(=O)c3c(O)cc(O)cc3O2)C	Gancao	338.354	Database: TCMSP (http://tcmspnw.com)	167	U.S. Patent Application No. 15/573,583.	1e-06	0.4143	0.0860263	N/A	4.09	5	3	3	In domain	+	0.9844	+	0.8020	-	0.4484	-	0.5857	Mitochondria	0.7620	-	0.5557	+	0.9450	+	0.9194	-	0.7400	-	0.9250	+	0.9033	-	0.4925	-	0.7923	+	0.5117	-	0.5755	-	0.8328	+
gancao_029	Glycyrrhetol	C[C@]1(CO)CC[C@]2(C)CC[C@]3(C)C(=CC(=O)[C@@H]4[C@@]5(C)CC[C@H](O)C(C)(C)[C@@H]5CC[C@@]34C)[C@@H]2C1	Gancao	456.7	Book: Chemical Components of Source Plants in Traditional Chinese Medicine (ISBN: 9787030235534)	167	U.S. Patent Application No. 15/573,583.	1e-06	0.5571	0.0857016	N/A	6.32	3	2	1	In domain	+	0.9934	+	0.6123	-	0.6828	+	0.5571	Mitochondria	0.8562	-	1.0000	-	0.4398	+	0.9603	-	0.9800	+	0.7010	+	0.9163	-	0.6975	-	0.8840	+	0.6896	-	1.0000	-	0.8777	-
MOL000008	apigenin	Oc1ccc(cc1)C2=CC(=O)c3c(O)cc(O)cc3O2	Zhishi	270.237	Database: TCMSP (http://tcmspnw.com)	167	U.S. Patent Application No. 15/573,583.	1e-06	0.3286	0.08543	N/A	2.58	5	3	1	In domain	+	0.9881	+	0.9313	-	0.5102	-	0.6714	Mitochondria	0.6655	-	0.6489	+	0.9360	+	0.9480	+	0.6600	-	1.0000	-	0.6857	-	0.8292	-	0.9362	-	0.5417	-	0.6443	-	0.8503	+
MOL002565	Medicarpin	COc1ccc2[C@@H]3COc4cc(O)ccc4[C@@H]3Oc2c1	Gancao	270.28	Database: TCMSP (http://tcmspnw.com)	167	U.S. Patent Application No. 15/573,583.	1e-06	0.3286	0.0854164	N/A	3.01	4	1	1	In domain	+	0.9961	+	0.7762	+	0.9042	-	0.6714	Mitochondria	0.7629	-	0.8606	+	0.9072	+	0.9898	-	0.9000	-	0.9000	-	0.6182	-	0.7715	-	0.7116	+	0.5421	-	0.7778	+	0.4927	+
maidong_022	Ophiopogonanone D	COc1c(C)c(O)c(C=O)c2OC[C@@H](Cc3ccc4OCOc4c3)C(=O)c12	Maidong	370.353	Book: Chemical Components of Source Plants in Traditional Chinese Medicine (ISBN: 9787030235534)	250	U.S. Patent Application No. 15/573,583.	1e-06	0.3	0.0851955	N/A	2.68	7	1	4	In domain	+	0.9827	+	0.6187	-	0.2375	-	0.7000	Mitochondria	0.7669	-	1.0000	+	0.8457	+	0.9369	-	0.8800	-	0.9250	+	0.6235	+	0.5729	-	0.7008	+	0.5916	-	0.6021	-	0.8201	+
kushen_076	2-n-Tridecyl-5,7-dihydroxy-6,8-dimethyl chromone	CCCCCCCCCCCCCC1=CC(=O)c2c(O)c(C)c(O)c(C)c2O1	Kushen	388.54	Book: Chemical Components of Source Plants in Traditional Chinese Medicine (ISBN: 9787030235534)	250	U.S. Patent Application No. 15/573,583.	1e-06	0.3143	0.0850784	N/A	6.67	4	2	12	In domain	+	0.9859	-	0.5169	+	0.8266	-	0.6857	Mitochondria	0.4980	+	0.5714	+	0.7713	+	0.9189	-	0.7000	-	0.8250	-	0.5830	-	0.5663	-	0.7411	-	0.5178	-	0.5690	-	0.8293	+
gancao_053	Licoisoflavone	CC(=CCc1c(O)ccc(C2=COc3cc(O)cc(O)c3C2=O)c1O)C	Gancao	354.353	Book: Chemical Components of Source Plants in Traditional Chinese Medicine (ISBN: 9787030235534)	167	U.S. Patent Application No. 15/573,583.	1e-06	0.4286	0.0849773	N/A	3.79	6	4	3	In domain	+	0.9844	+	0.5802	-	0.4484	-	0.5714	Mitochondria	0.7620	+	0.5807	+	0.8641	+	0.9194	-	0.7400	-	0.9250	+	0.5832	-	0.6275	-	0.7809	+	0.5634	-	0.5755	-	0.8328	+
MOL004853	Licoflavonol	CC(=CCc1c(O)cc2OC(=C(O)C(=O)c2c1O)c3ccc(O)cc3)C	Gancao	354.353	Database: TCMSP (http://tcmspnw.com)	167	U.S. Patent Application No. 15/573,583.	1e-06	0.4286	0.0849773	N/A	3.79	6	4	3	In domain	+	0.9844	-	0.8086	-	0.3575	-	0.5714	Mitochondria	0.6291	-	0.5411	+	0.8910	+	0.9248	-	0.7400	-	0.9250	+	0.8740	-	0.5590	-	0.6807	+	0.5508	-	0.5755	-	0.8328	-
gancao_049	Liconeolignan	COc1cc2oc(c(O)c2cc1OC)c3ccc(O)c(CC=C(C)C)c3	Gancao	354.396	Book: Chemical Components of Source Plants in Traditional Chinese Medicine (ISBN: 9787030235534)	167	U.S. Patent Application No. 15/573,583.	1e-06	0.4286	0.084967	N/A	5.04	5	2	5	In domain	+	0.9898	+	0.7099	+	0.8997	-	0.5714	Mitochondria	0.6582	-	0.7137	+	0.9334	+	0.8836	-	0.8600	-	0.9250	+	0.8150	+	0.7579	-	0.5908	+	0.5245	-	1.0000	+	0.4182	-
gancao_038	Hispaglabridin B	CC1(C)Oc2ccc([C@@H]3COc4c(C3)ccc5OC(C)(C)C=Cc45)c(O)c2C=C1	Gancao	390.472	Book: Chemical Components of Source Plants in Traditional Chinese Medicine (ISBN: 9787030235534)	167	U.S. Patent Application No. 15/573,583.	1e-06	0.4714	0.0848179	N/A	5.48	4	1	1	In domain	+	0.9948	+	0.5891	+	0.9303	-	0.5286	Mitochondria	0.8136	-	0.8602	+	0.8871	+	0.9770	-	0.9400	-	0.8250	+	0.9760	+	0.7361	+	0.5545	+	0.6145	+	0.5918	+	0.3827	-
MOL001484	Inermine	Oc1ccc2[C@@H]3Oc4cc5OCOc5cc4[C@@H]3COc2c1	Gancao	284.263	Database: TCMSP (http://tcmspnw.com)	167	U.S. Patent Application No. 15/573,583.	1e-06	0.3429	0.0847488	N/A	2.73	5	1	0	In domain	+	0.9862	+	0.5450	+	0.9272	-	0.6571	Mitochondria	0.6697	-	0.8633	+	0.8875	+	0.9548	-	0.8800	-	0.9250	-	0.5319	-	0.7047	-	0.8393	-	0.5442	-	0.8038	+	0.3452	-
MOL006620	kushenol J_qt	COc1ccc(cc1)[C@H]2Oc3cc(O)ccc3C(=O)[C@@H]2O	Kushen	286.279	Database: TCMSP (http://tcmspnw.com)	250	U.S. Patent Application No. 15/573,583.	1e-06	0.2286	0.0839841	N/A	2.08	5	2	2	In domain	+	0.9944	-	0.6165	-	0.4548	-	0.7714	Mitochondria	0.8113	-	0.7263	+	0.7935	+	0.9877	-	0.9400	-	0.9000	-	0.7676	-	0.6626	-	0.9083	+	0.5773	-	1.0000	-	0.7112	-
fuling_024	Poricoic acid B	CC(=CCC[C@H]([C@H]1[C@H](O)C[C@@]2(C)C3=CC[C@@H](C(=C)C)[C@](C)(CCC(=O)O)C3=CC[C@]12C)C(=O)O)C	Fuling	484.667	Book: Chemical Components of Source Plants in Traditional Chinese Medicine (ISBN: 9787030235534)	250	U.S. Patent Application No. 15/573,583.	1e-06	0.3857	0.0836983	N/A	6.55	3	3	9	In domain	+	0.9923	+	0.5162	-	0.9493	-	0.6143	Mitochondria	0.8561	-	0.8570	+	0.8356	-	0.5674	-	0.9800	-	0.6282	+	0.9494	+	0.6110	+	0.5148	+	0.6468	-	0.8398	-	0.8724	-
fuling_028	Poricoic acid G	CC(=CCC[C@H]([C@H]1[C@H](O)C[C@@]2(C)C3=C(CC[C@]12C)[C@@](C)(CCC(=O)O)[C@@H](CC3)C(=C)C)C(=O)O)C	Fuling	486.683	Book: Chemical Components of Source Plants in Traditional Chinese Medicine (ISBN: 9787030235534)	250	U.S. Patent Application No. 15/573,583.	1e-06	0.3857	0.0833516	N/A	6.77	3	3	9	In domain	+	0.9853	-	0.5326	-	0.9493	-	0.6143	Mitochondria	0.8561	-	0.7163	+	0.7870	-	0.5674	-	1.0000	-	0.6282	+	0.9423	-	0.4615	-	0.5909	+	0.6787	-	0.8404	-	0.8509	-
MOL000239	Jaranol	COC1=C(Oc2cc(OC)cc(O)c2C1=O)c3ccc(O)cc3	Gancao	314.289	Database: TCMSP (http://tcmspnw.com)	167	U.S. Patent Application No. 15/573,583.	1e-06	0.3714	0.0830232	N/A	2.89	6	2	3	In domain	+	0.9889	+	0.5307	-	0.4399	-	0.6286	Mitochondria	0.8156	-	0.5704	+	0.9116	+	0.9738	+	0.5400	-	0.9500	+	0.5587	+	0.7506	-	0.8759	+	0.5283	-	0.6401	-	0.8296	-
MOL005018	Xambioona	CC1(C)Oc2ccc(cc2C=C1)[C@@H]3CC(=O)c4ccc5OC(C)(C)C=Cc5c4O3	Gancao	388.456	Database: TCMSP (http://tcmspnw.com)	167	U.S. Patent Application No. 15/573,583.	1e-06	0.4571	0.0826717	N/A	5.76	4	0	1	In domain	+	0.9905	+	0.6938	+	0.8826	-	0.5429	Mitochondria	0.7885	-	1.0000	+	0.8990	+	0.9859	-	1.0000	-	1.0000	+	0.9766	+	0.8607	-	0.6295	+	0.6054	-	0.8027	-	0.7486	+
MOL004884	Licoisoflavone B	CC1(C)Oc2ccc(C3=COc4cc(O)cc(O)c4C3=O)c(O)c2C=C1	Gancao	352.337	Database: TCMSP (http://tcmspnw.com)	167	U.S. Patent Application No. 15/573,583.	1e-06	0.4143	0.0826121	N/A	3.76	6	3	1	In domain	+	0.9718	+	0.5180	+	0.7910	-	0.5857	Mitochondria	0.8165	-	0.5582	+	0.8392	+	0.9419	-	0.8000	-	1.0000	+	0.6017	-	0.5273	-	0.6610	+	0.6418	-	0.6192	-	0.8382	+
kushen_026	Kuraridinol	COc1cc(O)c(C[C@H](CCC(C)(C)O)C(=C)C)c(O)c1C(=O)\C=C\c2ccc(O)cc2O	Kushen	456.528	Book: Chemical Components of Source Plants in Traditional Chinese Medicine (ISBN: 9787030235534)	250	U.S. Patent Application No. 15/573,583.	1e-06	0.3571	0.0822684	N/A	4.70	7	5	10	In domain	+	0.9849	-	0.6340	+	0.7698	-	0.6429	Mitochondria	0.7916	-	0.5719	+	0.8021	+	0.8738	-	0.9000	-	0.9000	+	0.9228	+	0.6771	+	0.6467	+	0.6444	-	0.8042	-	0.8556	+
MOL004885	licoisoflavanone	CC1(C)Oc2ccc([C@@H]3COc4cc(O)cc(O)c4C3=O)c(O)c2C=C1	Gancao	354.353	Database: TCMSP (http://tcmspnw.com)	167	U.S. Patent Application No. 15/573,583.	1e-06	0.4143	0.0821421	N/A	3.35	6	3	1	In domain	+	0.9864	+	0.5521	+	0.8279	-	0.5857	Mitochondria	0.8453	-	0.5755	+	0.9046	+	0.9571	-	0.9200	-	1.0000	+	0.6424	-	0.7196	-	0.5573	+	0.6306	+	0.5981	-	0.8360	+
renshen_074	Ginsenoyne E	CCCCCCC[C@H]1O[C@@H]1CC#CC#CC(=O)C=C	Renshen	258.355	Book: Chemical Components of Source Plants in Traditional Chinese Medicine (ISBN: 9787030235534)	167	U.S. Patent Application No. 15/573,583.	1e-06	0.3	0.0815814	N/A	3.27	2	0	8	In domain	+	0.9595	+	0.7084	+	0.9823	-	0.7000	Plasma membrane	0.6354	-	0.8555	+	0.8359	+	0.9292	-	0.7600	-	0.7250	-	0.7925	-	0.8542	-	0.6984	+	0.5345	-	0.6039	-	0.8321	-
MOL006653	xanthohumol	CCOc1cc(O)c(CC=C(C)C)c(O)c1C(=O)\C=C\c2ccc(O)cc2	Kushen	368.423	Database: TCMSP (http://tcmspnw.com)	250	U.S. Patent Application No. 15/573,583.	1e-06	0.2857	0.0815595	N/A	4.61	5	3	7	In domain	+	0.9878	+	0.6696	+	0.8407	-	0.7143	Mitochondria	0.8879	-	0.5758	+	0.8786	+	0.9314	-	0.9400	-	0.9000	+	0.9281	+	0.6722	-	0.7345	+	0.5702	-	0.7875	-	0.8322	-
gancao_021	Glabrolide	CC1(C)[C@@H](O)CC[C@@]2(C)[C@H]1CC[C@]3(C)[C@@H]2C(=O)C=C4[C@@H]5C[C@]6(C)C[C@@H](OC6=O)[C@]5(C)CC[C@@]34C	Gancao	468.668	Book: Chemical Components of Source Plants in Traditional Chinese Medicine (ISBN: 9787030235534)	167	U.S. Patent Application No. 15/573,583.	1e-06	0.5429	0.0813845	N/A	5.86	4	1	0	In domain	+	0.9800	+	0.5063	+	0.8754	+	0.5429	Mitochondria	0.8297	-	1.0000	-	0.3717	+	0.8704	-	0.9200	+	0.5897	+	0.9124	-	0.4947	-	0.8122	+	0.6956	-	0.7791	-	0.8921	-
MOL003347	hyperforin	CC(C)C(=O)[C@@]12C(=O)C(=C(O)[C@@](CC=C(C)C)(C[C@H](CC=C(C)C)[C@@]1(C)CCC=C(C)C)C2=O)CC=C(C)C	Kushen	536.785	Database: TCMSP (http://tcmspnw.com)	250	U.S. Patent Application No. 15/573,583.	1e-06	0.4143	0.0811756	N/A	8.99	4	1	11	Warning	+	0.9826	+	0.5420	+	0.8131	-	0.5857	Mitochondria	0.8231	-	0.8516	+	0.8747	+	0.8129	-	0.7600	-	0.7250	+	0.9361	-	0.7326	-	0.5295	+	0.6255	-	1.0000	-	0.8725	-
gancao_077	Methylglycyrrhetate	COC(=O)[C@@]1(C)CC[C@]2(C)CC[C@]3(C)C(=CC(=O)[C@@H]4[C@@]5(C)CC[C@H](O)C(C)(C)[C@@H]5CC[C@@]34C)[C@@H]2C1	Gancao	484.71	Book: Chemical Components of Source Plants in Traditional Chinese Medicine (ISBN: 9787030235534)	167	U.S. Patent Application No. 15/573,583.	1e-06	0.5571	0.0807492	N/A	6.50	4	1	1	In domain	+	0.9950	+	0.5144	-	0.3914	+	0.5571	Mitochondria	0.8988	-	1.0000	-	0.6068	-	0.3447	-	0.8000	-	0.6071	+	0.8964	-	0.4677	-	0.8633	+	0.7156	-	0.7735	-	0.9017	-
MOL006641	sophoraflavanone,g	CC(=C[C@H](Cc1c(O)cc(O)c(C(=O)\C=C\c2ccc(O)cc2O)c1O)C(=C)C)C	Kushen	410.46	Database: TCMSP (http://tcmspnw.com)	250	U.S. Patent Application No. 15/573,583.	1e-06	0.3143	0.080535	N/A	4.81	6	5	7	In domain	+	0.9901	-	0.5979	-	0.3151	-	0.6857	Mitochondria	0.7533	+	0.5733	+	0.7778	+	0.8972	-	0.8600	-	0.9250	+	0.9352	-	0.4769	-	0.5860	+	0.5675	-	0.7795	-	0.8601	+
MOL004908	Glabridin	CC1(C)Oc2ccc3C[C@@H](COc3c2C=C1)c4ccc(O)cc4O	Gancao	324.37	Database: TCMSP (http://tcmspnw.com)	167	U.S. Patent Application No. 15/573,583.	1e-06	0.3714	0.0804429	N/A	4.00	4	2	1	In domain	+	0.9948	+	0.9312	+	0.8935	-	0.6286	Mitochondria	0.8049	-	0.8524	+	0.8862	+	0.9636	-	0.9400	-	0.9250	+	0.6754	-	0.7537	+	0.7637	+	0.6459	+	0.5918	+	0.3827	-
gancao_079	Methyl 18alpha-hydroxyglycyrrhetate	COC(=O)[C@@]1(C)CC[C@]2(C)CC[C@@]3(C)C(=CC(=O)[C@@H]4[C@@]5(C)CC[C@H](O)C(C)(C)[C@@H]5CC[C@@]34C)[C@]2(O)C1	Gancao	500.71	Book: Chemical Components of Source Plants in Traditional Chinese Medicine (ISBN: 9787030235534)	167	U.S. Patent Application No. 15/573,583.	1e-06	0.5714	0.0801755	N/A	5.62	5	2	1	In domain	+	0.9929	-	0.5360	-	0.6966	+	0.5714	Mitochondria	0.8924	-	1.0000	+	0.7556	-	0.4725	-	0.8000	-	0.6821	+	0.8370	-	0.5000	-	0.7335	+	0.7115	-	0.8090	-	0.9000	-
MOL005020	dehydroglyasperins C	CC(=CCc1c(O)cc2OCC(=Cc2c1O)c3ccc(O)cc3O)C	Gancao	340.37	Database: TCMSP (http://tcmspnw.com)	167	U.S. Patent Application No. 15/573,583.	1e-06	0.3857	0.0796134	N/A	3.95	5	4	3	In domain	+	0.9971	+	0.6589	+	0.7977	-	0.6143	Mitochondria	0.7549	-	0.5609	+	0.8351	+	0.9557	-	0.9600	-	0.9000	+	0.8456	-	0.5399	+	0.5207	+	0.5439	-	0.5827	+	0.4376	-
renshen_035	Folic acid	NC1=NC(=O)c2nc(CNc3ccc(cc3)C(=O)N[C@H](CCC(=O)O)C(=O)O)cnc2N1	Renshen	441.397	Book: Chemical Components of Source Plants in Traditional Chinese Medicine (ISBN: 9787030235534)	167	U.S. Patent Application No. 15/573,583.	1e-06	0.5	0.0795843	N/A	-0.04	9	6	9	In domain	+	0.8554	-	0.9072	+	0.9469	-	0.5000	Mitochondria	0.4625	-	0.8574	+	0.9413	+	0.9491	-	0.9609	-	0.9500	-	0.8585	-	0.8678	+	0.5286	+	0.5688	-	0.8028	-	0.8441	-
renshen_078	Gomisin A	COc1cc2C[C@@](C)(O)[C@H](C)Cc3cc4OCOc4c(OC)c3c2c(OC)c1OC	Renshen	416.464	Book: Chemical Components of Source Plants in Traditional Chinese Medicine (ISBN: 9787030235534)	167	U.S. Patent Application No. 15/573,583.	1e-06	0.4714	0.0795242	N/A	3.60	7	1	4	In domain	+	0.9794	+	0.9313	+	0.9198	-	0.5286	Mitochondria	0.6026	-	0.8659	+	0.9222	+	0.9314	-	0.9400	-	0.8750	+	0.8322	-	0.5075	-	0.7276	+	0.6117	-	0.5852	+	0.3508	+
gancao_040	Isoglycyrol	COc1c2CCC(C)(C)Oc2cc3OC(=O)c4c(oc5cc(O)ccc45)c13	Gancao	366.364	Book: Chemical Components of Source Plants in Traditional Chinese Medicine (ISBN: 9787030235534)	167	U.S. Patent Application No. 15/573,583.	1e-06	0.4143	0.0794492	N/A	4.51	6	1	1	In domain	+	0.9870	+	0.6743	+	0.8967	-	0.5857	Mitochondria	0.7653	-	0.7202	+	0.8917	+	0.9306	-	0.9000	-	0.7750	+	0.5939	+	0.6152	-	0.6536	+	0.6298	-	0.5848	-	0.8153	-
MOL001965	Dauricine (8CI)	COc1cc2CCN(C)[C@H](Cc3ccc(Oc4cc(C[C@H]5N(C)CCc6cc(OC)c(OC)cc56)ccc4O)cc3)c2cc1OC	Renshen	624.766	Database: TCMSP (http://tcmspnw.com)	250	U.S. Patent Application No. 15/573,583.	1e-06	0.4714	0.0793566	N/A	6.76	8	1	10	In domain	+	0.9864	-	0.7621	+	0.9844	-	0.5286	Mitochondria	0.6826	+	0.7173	+	0.9326	+	0.9426	-	0.8000	+	0.5500	+	0.9801	+	0.9283	-	0.5649	+	0.6711	+	0.7865	+	0.7818	-
kushen_063	2-n-Pentadecyl-5, 7-dihydroxy-6,8-dimethyl chromone	CCCCCCCCCCCCCCCC1=CC(=O)c2c(O)c(C)c(O)c(C)c2O1	Kushen	416.593	Book: Chemical Components of Source Plants in Traditional Chinese Medicine (ISBN: 9787030235534)	250	U.S. Patent Application No. 15/573,583.	1e-06	0.3143	0.0793492	N/A	7.45	4	2	14	In domain	+	0.9859	-	0.5964	+	0.8266	-	0.6857	Mitochondria	0.4980	+	0.5732	+	0.7713	+	0.9189	-	0.7000	-	0.8250	-	0.6331	-	0.5323	-	0.7411	-	0.5178	-	0.5690	-	0.8293	+
fuling_017	3 beta-Hydroxylanosta-7,9(11),24-trien-21-oic acid	CC(=CCC[C@@H]([C@H]1CC[C@@]2(C)C3=CC[C@H]4C(C)(C)[C@@H](O)CC[C@]4(C)C3=CC[C@]12C)C(=O)O)C	Fuling	454.684	Book: Chemical Components of Source Plants in Traditional Chinese Medicine (ISBN: 9787030235534)	250	U.S. Patent Application No. 15/573,583.	1e-06	0.3429	0.0793174	N/A	7.32	2	2	5	In domain	+	0.9923	+	0.7264	-	0.8109	-	0.6571	Mitochondria	0.8408	-	0.8609	+	0.8662	+	0.9147	-	0.9800	+	0.5500	+	0.9597	+	0.5747	-	0.6656	+	0.6461	-	0.8398	-	0.8724	-
gancao_037	Hispaglabridin A	CC(=CCc1c(O)ccc([C@@H]2COc3c(C2)ccc4OC(C)(C)C=Cc34)c1O)C	Gancao	392.487	Book: Chemical Components of Source Plants in Traditional Chinese Medicine (ISBN: 9787030235534)	167	U.S. Patent Application No. 15/573,583.	1e-06	0.4429	0.0792807	N/A	5.51	4	2	3	In domain	+	0.9948	+	0.6693	+	0.8790	-	0.5571	Mitochondria	0.7709	-	0.8597	+	0.8648	+	0.9308	-	0.9400	-	0.9000	+	0.9704	+	0.6694	+	0.6163	+	0.6448	+	0.5918	+	0.3827	-
kushen_077	Trifolirhizin-6''-O-malonat	O[C@@H]1[C@@H](COC(=O)CC(=O)[O-])O[C@@H](Oc2ccc3[C@@H]4Oc5cc6OCOc6cc5[C@@H]4COc3c2)[C@H](O)[C@H]1O	Kushen	531.442	Book: Chemical Components of Source Plants in Traditional Chinese Medicine (ISBN: 9787030235534)	250	U.S. Patent Application No. 15/573,583.	1e-06	0.4	0.0791616	N/A	-1.11	13	3	6	In domain	-	0.4148	-	0.9003	+	0.7987	-	0.6000	Mitochondria	0.5449	-	0.8540	+	0.8947	+	0.9471	-	0.8800	-	0.7000	+	0.7633	-	0.4502	-	0.6986	+	0.6470	-	1.0000	-	0.8520	-
MOL000511	ursolic acid	C[C@@H]1CC[C@@]2(CC[C@]3(C)C(=CC[C@@H]4[C@@]5(C)CC[C@H](O)C(C)(C)[C@@H]5CC[C@@]34C)[C@@H]2[C@H]1C)C(=O)O	Gancao	456.7	Database: TCMSP (http://tcmspnw.com)	167	U.S. Patent Application No. 15/573,583.	1e-06	0.5143	0.0791175	N/A	7.09	2	2	1	In domain	+	0.9853	+	0.6086	-	0.6782	+	0.5143	Mitochondria	0.8699	-	0.7168	+	0.9413	+	0.9479	-	1.0000	+	0.6000	+	0.8278	-	0.9166	-	0.8292	+	0.6600	-	0.8404	-	0.8509	-
MOL006602	isokurarinone	COc1cc(O)ccc1[C@@H]2CC(=O)c3c(O)c(C[C@H](CC=C(C)C)C(=C)C)c(O)cc3O2	Kushen	438.513	Database: TCMSP (http://tcmspnw.com)	250	U.S. Patent Application No. 15/573,583.	1e-06	0.3286	0.0788127	N/A	5.61	6	3	7	In domain	+	0.9951	-	0.6624	-	0.3578	-	0.6714	Mitochondria	0.7014	-	0.8593	+	0.8548	+	0.9090	-	0.8800	-	0.9000	+	0.7975	+	0.6239	+	0.5140	+	0.6562	+	0.5973	-	0.7963	+
kushen_046	Kushenol X	CC(=CC[C@H](Cc1c(O)cc(O)c2C(=O)[C@H](O)[C@H](Oc12)c3ccc(O)cc3O)C(=C)C)C	Kushen	440.486	Book: Chemical Components of Source Plants in Traditional Chinese Medicine (ISBN: 9787030235534)	250	U.S. Patent Application No. 15/573,583.	1e-06	0.3286	0.0784597	N/A	4.28	7	5	6	In domain	+	0.9945	-	0.7644	-	0.3575	-	0.6714	Mitochondria	0.5788	-	0.5697	+	0.8193	+	0.9030	-	0.9600	-	0.9000	+	0.8277	+	0.5721	-	0.5496	+	0.6371	-	1.0000	-	0.7937	-
kushen_021	Kosamol U	COc1cc(O)c(C[C@H](CC=C(C)C)C(=C)C)c2O[C@@H](CC(=O)c12)c3ccc(O)cc3	Kushen	422.513	Book: Chemical Components of Source Plants in Traditional Chinese Medicine (ISBN: 9787030235534)	250	U.S. Patent Application No. 15/573,583.	1e-06	0.3143	0.0782375	N/A	5.90	5	2	7	In domain	+	0.9965	+	0.5459	-	0.3803	-	0.6857	Mitochondria	0.8008	-	1.0000	+	0.8347	+	0.8539	-	0.9200	-	0.9000	+	0.9069	+	0.7377	-	0.6135	+	0.6355	-	0.7880	-	0.7350	-
MOL004891	shinpterocarpin	CC1(C)Oc2ccc3[C@@H]4Oc5cc(O)ccc5[C@@H]4COc3c2C=C1	Gancao	322.355	Database: TCMSP (http://tcmspnw.com)	167	U.S. Patent Application No. 15/573,583.	1e-06	0.3571	0.0778293	N/A	4.19	4	1	0	In domain	+	0.9932	+	0.7730	+	0.9597	-	0.6429	Mitochondria	0.7829	-	0.8602	+	0.8743	+	0.9734	-	1.0000	-	0.8750	+	0.7950	-	0.6452	+	0.5532	+	0.5991	+	0.8070	-	0.7007	-
MOL005012	Licoagroisoflavone	CC(=C)[C@H]1Cc2c(O)c3C(=O)C(=COc3cc2O1)c4ccc(O)cc4	Gancao	336.338	Database: TCMSP (http://tcmspnw.com)	167	U.S. Patent Application No. 15/573,583.	1e-06	0.3714	0.0775806	N/A	3.75	5	2	2	In domain	+	0.9848	-	0.6356	-	0.4380	-	0.6286	Mitochondria	0.8093	-	0.5748	+	0.9099	+	0.9496	-	0.8200	-	0.9500	-	0.6715	+	0.5755	-	0.7177	+	0.5942	-	0.5929	-	0.8145	-
renshen_004	Aposcopolamine	CN1[C@@H]2CC(C[C@H]1[C@@H]3O[C@H]23)OC(=O)C(=C)c4ccccc4	Renshen	285.338	Book: Chemical Components of Source Plants in Traditional Chinese Medicine (ISBN: 9787030235534)	167	U.S. Patent Application No. 15/573,583.	1e-06	0.3143	0.0773878	N/A	1.86	4	0	3	In domain	+	0.9904	+	0.9090	+	0.9746	-	0.6857	Mitochondria	0.4295	-	1.0000	+	0.9420	+	0.9444	-	0.7809	+	0.5750	-	0.8073	-	0.9167	-	0.8864	+	0.5377	-	0.5875	+	0.4191	-
gancao_086	Phaseollinisoflavan	CC1(C)Oc2ccc([C@@H]3COc4cc(O)ccc4C3)c(O)c2C=C1	Gancao	324.37	Book: Chemical Components of Source Plants in Traditional Chinese Medicine (ISBN: 9787030235534)	167	U.S. Patent Application No. 15/573,583.	1e-06	0.3571	0.0773457	N/A	4.00	4	2	1	In domain	+	0.9948	+	0.7876	+	0.8988	-	0.6429	Mitochondria	0.8655	-	0.8571	+	0.8561	+	0.9739	-	0.9400	-	0.9000	+	0.8065	-	0.6955	+	0.7441	+	0.6241	+	0.5918	+	0.3827	-
renshen_033	(9R,10S)-Epoxyheptadecan-4,6-diyn-3-one	CCCCCCC[C@@H]1O[C@@H]1CC#CC#CC(=O)CC	Renshen	260.371	Book: Chemical Components of Source Plants in Traditional Chinese Medicine (ISBN: 9787030235534)	167	U.S. Patent Application No. 15/573,583.	1e-06	0.2857	0.0770911	N/A	3.49	2	0	8	In domain	+	0.9512	+	0.7277	+	0.9890	-	0.7143	Mitochondria	0.4629	-	0.8539	+	0.8745	+	0.9469	-	0.9000	-	0.7250	-	0.6377	-	0.8549	-	0.7602	+	0.5407	-	0.6180	-	0.8085	-
renshen_024	Dianthoside	CC1=C(O[C@@H]2O[C@H](CO)[C@@H](O)[C@H](O)[C@H]2O)C(=O)C=CO1	Renshen	288.251	Book: Chemical Components of Source Plants in Traditional Chinese Medicine (ISBN: 9787030235534)	167	U.S. Patent Application No. 15/573,583.	1e-06	0.3143	0.0766058	N/A	-1.87	8	4	3	In domain	-	0.5506	-	0.8878	-	0.7825	-	0.6857	Mitochondria	0.7234	-	1.0000	+	0.9339	+	0.9540	-	0.9200	-	0.8000	-	0.9397	-	0.9128	-	0.9754	+	0.5150	-	0.8252	-	0.8638	-
gancao_041	Isolicoflavonol	CC(=CCc1cc(ccc1O)C2=C(O)C(=O)c3c(O)cc(O)cc3O2)C	Gancao	354.353	Book: Chemical Components of Source Plants in Traditional Chinese Medicine (ISBN: 9787030235534)	167	U.S. Patent Application No. 15/573,583.	1e-06	0.3857	0.0764716	N/A	3.79	6	4	3	In domain	+	0.9844	+	0.5229	-	0.3575	-	0.6143	Mitochondria	0.6291	-	0.5335	+	0.8740	+	0.9248	-	0.7400	-	0.9250	+	0.9202	-	0.5599	-	0.6478	+	0.5706	-	0.5755	-	0.8328	-
kushen_031	Kushenol B	CC(=CC[C@@H](Cc1c(O)c(CC=C(C)C)c(O)c2C(=O)C[C@H](Oc12)c3ccc(O)cc3O)C(=C)C)C	Kushen	492.603	Book: Chemical Components of Source Plants in Traditional Chinese Medicine (ISBN: 9787030235534)	250	U.S. Patent Application No. 15/573,583.	1e-06	0.3571	0.0762436	N/A	6.82	6	4	8	In domain	+	0.9951	-	0.7062	-	0.4500	-	0.6429	Mitochondria	0.7540	-	0.5738	+	0.8002	+	0.9309	-	0.8800	-	0.8750	+	0.9328	+	0.6867	+	0.6343	+	0.6452	+	0.5973	-	0.7963	-
fuling_014	3 beta-Hydroxy-16 alpha-acetoxy-lanosta-7 ,9(11),24-trien-21-oic acid	CC(=CCC[C@H]([C@H]1[C@@H](C[C@@]2(C)C3=CC[C@H]4C(C)(C)[C@@H](O)CC[C@]4(C)C3=CC[C@]12C)OC(=O)C)C(=O)O)C	Fuling	512.721	Book: Chemical Components of Source Plants in Traditional Chinese Medicine (ISBN: 9787030235534)	250	U.S. Patent Application No. 15/573,583.	1e-06	0.3714	0.0761854	N/A	6.86	4	2	6	In domain	+	0.9873	-	0.5311	-	0.9405	-	0.6286	Mitochondria	0.8894	-	0.8584	+	0.8581	-	0.4805	-	0.9200	-	0.6782	+	0.9760	+	0.7604	-	0.6322	+	0.6780	-	1.0000	-	0.8849	-
gancao_080	Methyl-24-hydroxyglycyrrhetate	COC(=O)[C@@]1(C)CC[C@]2(C)CC[C@]3(C)C(=CC(=O)[C@@H]4[C@@]5(C)CC[C@H](O)[C@](C)(CO)[C@@H]5CC[C@@]34C)[C@@H]2C1	Gancao	500.71	Book: Chemical Components of Source Plants in Traditional Chinese Medicine (ISBN: 9787030235534)	167	U.S. Patent Application No. 15/573,583.	1e-06	0.5429	0.0761765	N/A	5.47	5	2	2	In domain	+	0.9923	-	0.5746	+	0.8531	+	0.5429	Mitochondria	0.8575	-	0.7165	-	0.4185	-	0.3041	-	0.8400	-	0.5521	+	0.9065	-	0.4576	-	0.6907	+	0.7185	-	0.7976	-	0.9044	-
gancao_052	Licofuranocoumarin	COc1c2C[C@@H](Oc2cc3OC(=O)C(=Cc13)c4ccc(O)cc4O)C(C)(C)O	Gancao	384.379	Book: Chemical Components of Source Plants in Traditional Chinese Medicine (ISBN: 9787030235534)	167	U.S. Patent Application No. 15/573,583.	1e-06	0.4143	0.0757255	N/A	2.95	7	3	3	In domain	+	0.9821	+	0.6602	-	0.2644	-	0.5857	Mitochondria	0.6954	-	0.5715	+	0.8872	+	0.8160	-	0.8200	-	0.9000	-	0.5468	-	0.4732	-	0.5729	+	0.6382	-	0.6141	-	0.8043	+
MOL004824	(2S)-6-(2,4-dihydroxyphenyl)-2-(2-hydroxypropan-2-yl)-4-methoxy-2,3-dihydrofuro[3,2-g]chromen-7-one	COc1c2C[C@H](Oc2cc3OC(=O)C(=Cc13)c4ccc(O)cc4O)C(C)(C)O	Gancao	384.379	Database: TCMSP (http://tcmspnw.com)	167	U.S. Patent Application No. 15/573,583.	1e-06	0.4143	0.0757255	N/A	2.95	7	3	3	In domain	+	0.9821	+	0.6602	-	0.2644	-	0.5857	Mitochondria	0.6954	-	0.5715	+	0.8872	+	0.8160	-	0.8200	-	0.9000	-	0.5468	-	0.4732	-	0.5729	+	0.6382	-	0.6141	-	0.8043	+
gancao_068	Licorisoflavan A	COc1cc2OC[C@@H](Cc2c(OC)c1CC=C(C)C)c3ccc(O)c(CC=C(C)C)c3O	Gancao	438.556	Book: Chemical Components of Source Plants in Traditional Chinese Medicine (ISBN: 9787030235534)	167	U.S. Patent Application No. 15/573,583.	1e-06	0.4714	0.0755183	N/A	5.85	5	2	7	In domain	+	0.9959	+	0.6636	+	0.8017	-	0.5286	Mitochondria	0.7468	-	0.8628	+	0.9232	+	0.9224	-	0.9400	-	0.8750	+	0.9744	+	0.7919	-	0.5677	+	0.5934	-	0.6036	+	0.4888	-
renshen_145	Stigmasterol	CC[C@@H](\C=C\[C@@H](C)[C@H]1CC[C@H]2[C@@H]3CC=C4C[C@@H](O)CC[C@]4(C)[C@H]3CC[C@]12C)C(C)C	Renshen	412.691	Book: Chemical Components of Source Plants in Traditional Chinese Medicine (ISBN: 9787030235534)	167	U.S. Patent Application No. 15/573,583.	1e-06	0.4429	0.0753994	N/A	7.80	1	1	5	In domain	+	0.9914	+	0.5455	+	0.9247	-	0.5571	Lysosomes	0.4691	-	1.0000	+	0.9161	+	0.9820	-	1.0000	-	0.8750	+	0.7487	-	0.4322	+	0.7256	+	0.7080	-	0.6197	-	0.7147	-
renshen_134	Riboflavine	Cc1cc2N=C3C(=O)NC(=O)N=C3N(C[C@@H](O)[C@@H](O)[C@@H](O)CO)c2cc1C	Renshen	376.364	Book: Chemical Components of Source Plants in Traditional Chinese Medicine (ISBN: 9787030235534)	167	U.S. Patent Application No. 15/573,583.	1e-06	0.4	0.0746688	N/A	-1.72	9	5	5	In domain	+	0.8819	-	0.8020	+	0.9423	-	0.6000	Mitochondria	0.3960	-	1.0000	+	0.9413	+	0.9480	-	1.0000	-	1.0000	+	0.5593	-	0.7935	-	0.7126	+	0.5190	-	0.8062	-	0.8793	-
gancao_044	Isoononin	COc1ccc2C(=O)C(=COc2c1)c3ccc(O[C@@H]4O[C@H](CO)[C@H](O)[C@H](O)[C@H]4O)cc3	Gancao	430.405	Book: Chemical Components of Source Plants in Traditional Chinese Medicine (ISBN: 9787030235534)	167	U.S. Patent Application No. 15/573,583.	1e-06	0.4571	0.0746142	N/A	0.65	9	4	5	In domain	-	0.4104	-	0.8167	-	0.9420	-	0.5429	Mitochondria	0.6190	-	0.8415	+	0.9480	+	0.9740	-	0.9200	-	0.8000	+	0.7062	-	0.5857	-	0.8868	+	0.6117	-	1.0000	-	0.8291	-
gancao_035	Glyuranolide	COC(=O)[C@@]12CC[C@@]3(C)[C@H]4C[C@@](C)(C[C@H]3C1=CC(=O)[C@@H]5[C@@]6(C)CC[C@H](O)C(C)(C)[C@@H]6CC[C@@]25C)C(=O)O4	Gancao	512.677	Book: Chemical Components of Source Plants in Traditional Chinese Medicine (ISBN: 9787030235534)	167	U.S. Patent Application No. 15/573,583.	1e-06	0.5429	0.0743983	N/A	5.02	6	1	1	In domain	+	0.9819	-	0.5722	+	0.8906	+	0.5429	Mitochondria	0.8238	-	0.8603	+	0.6945	+	0.8544	-	0.8800	-	0.5603	+	0.9392	+	0.6195	-	0.6636	+	0.7236	-	0.8000	-	0.9018	-
kushen_008	2-n-Heptadecy-5,7-dihydroxy-6,8-dimethyl chromone	CCCCCCCCCCCCCCCCCC1=CC(=O)c2c(O)c(C)c(O)c(C)c2O1	Kushen	444.647	Book: Chemical Components of Source Plants in Traditional Chinese Medicine (ISBN: 9787030235534)	250	U.S. Patent Application No. 15/573,583.	1e-06	0.3143	0.074343	N/A	8.23	4	2	16	In domain	+	0.9859	-	0.6691	+	0.8266	-	0.6857	Mitochondria	0.4980	+	0.5732	+	0.7713	+	0.9189	-	0.7000	-	0.8250	-	0.7023	-	0.4760	-	0.7411	-	0.5178	-	0.5690	-	0.8293	+
gancao_078	Methyl-24-hydroxy-11-deoxoglycyrrhetate	COC(=O)[C@@]1(C)CC[C@]2(C)CC[C@]3(C)C(=CC[C@@H]4[C@@]5(C)CC[C@H](O)[C@](C)(CO)[C@@H]5CC[C@@]34C)[C@@H]2C1	Gancao	486.726	Book: Chemical Components of Source Plants in Traditional Chinese Medicine (ISBN: 9787030235534)	167	U.S. Patent Application No. 15/573,583.	1e-06	0.5143	0.0742368	N/A	6.29	4	2	2	In domain	+	0.9871	-	0.5671	+	0.8531	+	0.5143	Mitochondria	0.8207	-	0.7102	+	0.8829	-	0.4093	-	0.9600	-	0.6385	+	0.8866	-	0.5990	-	0.6973	+	0.6990	-	0.8066	-	0.8115	-
gancao_073	Lupiwighteone	CC(=CCc1c(O)cc(O)c2C(=O)C(=COc12)c3ccc(O)cc3)C	Gancao	338.354	Book: Chemical Components of Source Plants in Traditional Chinese Medicine (ISBN: 9787030235534)	167	U.S. Patent Application No. 15/573,583.	1e-06	0.3571	0.0741491	N/A	4.09	5	3	3	In domain	+	0.9844	+	0.7421	-	0.4484	-	0.6429	Mitochondria	0.7620	+	0.5709	+	0.9156	+	0.9194	-	0.7400	-	0.9250	+	0.7716	-	0.5599	-	0.8498	+	0.5187	-	0.5755	-	0.8328	+
MOL005003	Licoagrocarpin	COc1ccc2[C@@H]3COc4c(CC=C(C)C)c(O)ccc4[C@@H]3Oc2c1	Gancao	338.397	Database: TCMSP (http://tcmspnw.com)	167	U.S. Patent Application No. 15/573,583.	1e-06	0.3571	0.0741397	N/A	4.52	4	1	3	In domain	+	0.9959	+	0.7984	+	0.9116	-	0.6429	Mitochondria	0.8180	-	0.8666	+	0.9162	+	0.9452	-	0.9400	-	0.8000	+	0.8670	+	0.7171	-	0.6955	+	0.5657	-	0.6036	+	0.4888	+
fuling_001	O-Acetylpachymic acid-25-ol	CC(C)[C@H](CO)CC[C@H]([C@H]1[C@@H](C[C@@]2(C)C3=C(CC[C@]12C)[C@@]4(C)CC[C@H](OC(=O)C)C(C)(C)[C@@H]4CC3)OC(=O)C)C(=O)O	Fuling	588.815	Book: Chemical Components of Source Plants in Traditional Chinese Medicine (ISBN: 9787030235534)	250	U.S. Patent Application No. 15/573,583.	1e-06	0.4143	0.0740026	N/A	6.95	6	2	9	In domain	+	0.9728	-	0.8031	+	0.8241	-	0.5857	Mitochondria	0.9256	-	0.5678	+	0.7262	-	0.3540	-	0.9600	+	0.5235	+	0.8972	+	0.7509	-	0.6032	+	0.6974	-	0.8046	-	0.8819	-
MOL000012	Arachic acid	CCCCCCCCCCCCCCCCCCCC(=O)O	Gancao	312.53	Database: TCMSP (http://tcmspnw.com)	167	U.S. Patent Application No. 15/573,583.	1e-06	0.3286	0.0738691	N/A	7.11	1	1	18	In domain	+	0.8417	+	0.5331	+	0.9725	-	0.6714	Mitochondria	0.5152	-	0.8507	+	0.8902	-	0.3662	-	1.0000	-	0.9250	-	0.7230	-	0.8812	-	0.9647	-	0.7568	+	0.6720	-	0.8901	-
kushen_042	Kushenol M	CC(=CC[C@H](Cc1c(O)c(CC=C(C)C)c(O)c2C(=O)[C@H](O)[C@H](Oc12)c3ccc(O)cc3O)C(=C)C)C	Kushen	508.603	Book: Chemical Components of Source Plants in Traditional Chinese Medicine (ISBN: 9787030235534)	250	U.S. Patent Application No. 15/573,583.	1e-06	0.3571	0.0738452	N/A	5.79	7	5	8	In domain	+	0.9945	-	0.7865	-	0.3575	-	0.6429	Mitochondria	0.6356	+	0.5708	+	0.7813	+	0.9031	-	0.9600	-	0.8500	+	0.9143	+	0.6898	+	0.5608	+	0.6487	-	1.0000	-	0.7937	-
gancao_074	3'-Methoxyglabridin	COc1c(O)ccc([C@H]2COc3c(C2)ccc4OC(C)(C)C=Cc34)c1O	Gancao	354.396	Book: Chemical Components of Source Plants in Traditional Chinese Medicine (ISBN: 9787030235534)	167	U.S. Patent Application No. 15/573,583.	1e-06	0.3714	0.0736275	N/A	4.01	5	2	2	In domain	+	0.9948	+	0.8593	+	0.8283	-	0.6286	Mitochondria	0.6998	-	0.8581	+	0.8928	+	0.9626	-	0.9400	-	0.8750	+	0.5828	-	0.5582	+	0.5000	+	0.6474	+	0.5918	+	0.3827	-
MOL004974	3'-Methoxyglabridin	COc1c(O)ccc([C@@H]2COc3c(C2)ccc4OC(C)(C)C=Cc34)c1O	Gancao	354.396	Database: TCMSP (http://tcmspnw.com)	167	U.S. Patent Application No. 15/573,583.	1e-06	0.3714	0.0736275	N/A	4.01	5	2	2	In domain	+	0.9948	+	0.8593	+	0.8283	-	0.6286	Mitochondria	0.6998	-	0.8581	+	0.8928	+	0.9626	-	0.9400	-	0.8750	+	0.5828	-	0.5582	+	0.5000	+	0.6474	+	0.5918	+	0.3827	-
MOL004841	Licochalcone B	COc1c(O)c(O)ccc1\C=C\C(=O)c2ccc(O)cc2	Gancao	286.279	Database: TCMSP (http://tcmspnw.com)	167	U.S. Patent Application No. 15/573,583.	1e-06	0.3	0.0736238	N/A	2.71	5	3	4	In domain	+	0.9801	+	0.8450	+	0.8239	-	0.7000	Mitochondria	0.7949	-	0.5696	+	0.8625	+	0.9888	-	0.8400	-	0.9750	-	0.6330	-	0.8676	-	0.9142	-	0.5314	-	0.6000	-	0.7946	-
MOL005007	Glyasperins M	COc1cc(O)cc2OC[C@H](C(=O)c12)c3ccc4OC(C)(C)C=Cc4c3O	Gancao	368.38	Database: TCMSP (http://tcmspnw.com)	167	U.S. Patent Application No. 15/573,583.	1e-06	0.3857	0.0735599	N/A	3.65	6	2	2	In domain	+	0.9901	+	0.6443	+	0.7955	-	0.6143	Mitochondria	0.8799	-	1.0000	+	0.9038	+	0.9494	-	0.9200	-	0.9500	+	0.7185	-	0.5000	-	0.5182	+	0.6591	-	0.6021	-	0.7988	-
MOL006640	sokurarinone	CCOc1cc(O)ccc1[C@H]2CC(=O)c3ccc(O)c(CC[C@@H](CC=C(C)C)C(=C)C)c3O2	Kushen	450.567	Database: TCMSP (http://tcmspnw.com)	250	U.S. Patent Application No. 15/573,583.	1e-06	0.3143	0.0733662	N/A	6.68	5	2	9	In domain	+	0.9965	-	0.5745	+	0.8673	-	0.6857	Mitochondria	0.8904	-	1.0000	+	0.8611	+	0.9059	-	0.9200	-	0.8000	+	0.9667	+	0.8866	+	0.6288	+	0.6942	-	0.7880	-	0.7350	-
gancao_016	Gancaonin E	CC(=CCc1cc(cc(O)c1O)[C@@H]2CC(=O)c3c(O)cc(O)c(CC=C(C)C)c3O2)C	Gancao	424.486	Book: Chemical Components of Source Plants in Traditional Chinese Medicine (ISBN: 9787030235534)	167	U.S. Patent Application No. 15/573,583.	1e-06	0.4429	0.0733043	N/A	5.23	6	4	5	In domain	+	0.9908	+	0.5349	-	0.3614	-	0.5571	Mitochondria	0.6200	+	0.5651	+	0.8600	+	0.9733	-	0.8800	-	0.8750	+	0.7213	-	0.4603	-	0.7996	+	0.5432	-	0.7979	-	0.8017	-
gancao_066	Licoricidin	COc1c(CC=C(C)C)c(O)cc2OC[C@H](Cc12)c3ccc(O)c(CC=C(C)C)c3O	Gancao	424.529	Book: Chemical Components of Source Plants in Traditional Chinese Medicine (ISBN: 9787030235534)	167	U.S. Patent Application No. 15/573,583.	1e-06	0.4429	0.0732969	N/A	5.55	5	3	6	In domain	+	0.9959	+	0.6195	+	0.8017	-	0.5571	Mitochondria	0.7468	-	0.8601	+	0.9138	+	0.9224	-	0.9400	-	0.8750	+	0.9726	+	0.7010	-	0.5912	+	0.5872	-	0.6036	+	0.4888	-
qinghao_105	Patuletin 3-O-beta-D-glycopyranoside	COc1c(O)cc2OC(=C(O[C@@H]3O[C@H](CO)[C@@H](O)[C@H](O)[C@H]3O)C(=O)c2c1O)c4ccc(O)c(O)c4	Qinghao	494.402	Book: Chemical Components of Source Plants in Traditional Chinese Medicine (ISBN: 9787030235534)	250	U.S. Patent Application No. 15/573,583.	1e-06	0.3429	0.0729454	N/A	-0.53	13	8	5	Warning	+	0.6898	-	0.8631	-	0.9420	-	0.6571	Mitochondria	0.6190	+	0.5863	+	0.9212	+	0.9740	-	0.7800	-	0.8000	-	0.6050	-	0.6171	-	0.7565	+	0.6207	-	0.8415	-	0.8515	-
renshen_014	Campesterol	CC(C)[C@H](C)CC[C@@H](C)[C@H]1CC[C@H]2[C@@H]3CC=C4C[C@@H](O)CC[C@]4(C)[C@H]3CC[C@]12C	Renshen	400.68	Book: Chemical Components of Source Plants in Traditional Chinese Medicine (ISBN: 9787030235534)	167	U.S. Patent Application No. 15/573,583.	1e-06	0.4143	0.0726448	N/A	7.63	1	1	5	In domain	+	0.9930	+	0.6088	+	0.8569	-	0.5857	Mitochondria	0.4852	-	0.7263	+	0.9380	+	0.9480	-	1.0000	-	0.8500	+	0.7497	-	0.5686	+	0.7858	+	0.7286	-	0.6499	-	0.6843	-
gancao_001	3-O-Acetyl-glycyrrhetinic acid	CC(=O)O[C@H]1CC[C@@]2(C)[C@@H](CC[C@]3(C)[C@@H]2C(=O)C=C4[C@@H]5C[C@](C)(CC[C@]5(C)CC[C@@]34C)C(=O)O)C1(C)C	Gancao	512.721	Book: Chemical Components of Source Plants in Traditional Chinese Medicine (ISBN: 9787030235534)	167	U.S. Patent Application No. 15/573,583.	1e-06	0.5286	0.0724325	N/A	6.98	4	1	2	In domain	+	0.9919	-	0.6155	-	0.4506	+	0.5286	Mitochondria	0.9143	-	0.7177	-	0.7975	-	0.5699	-	0.5200	-	0.6071	+	0.9396	+	0.7391	-	0.8515	+	0.6954	-	0.8058	-	0.9141	-
renshen_036	Fructose	OC[C@@]1(O)OC[C@@H](O)[C@@H](O)[C@@H]1O	Renshen	180.156	Book: Chemical Components of Source Plants in Traditional Chinese Medicine (ISBN: 9787030235534)	167	U.S. Patent Application No. 15/573,583.	1e-06	0.1857	0.0724187	N/A	-3.22	6	5	1	In domain	-	0.9613	-	0.9513	+	0.8789	-	0.8143	Mitochondria	0.7016	-	0.8543	+	0.9605	+	0.9557	-	1.0000	-	0.9000	-	0.9571	-	0.9799	-	0.9048	-	0.6088	-	1.0000	-	0.8313	-
kushen_044	Kushenol 0	COc1ccc(cc1)C2=COc3cc(O[C@@H]4O[C@H](CO[C@H]5OC[C@@H](O)[C@@H](O)[C@@H]5O)[C@@H](O)[C@H](O)[C@@H]4O)ccc3C2=O	Kushen	562.519	Book: Chemical Components of Source Plants in Traditional Chinese Medicine (ISBN: 9787030235534)	250	U.S. Patent Application No. 15/573,583.	1e-06	0.3857	0.0721146	N/A	-0.89	13	6	7	In domain	+	0.6957	-	0.8827	-	0.7776	-	0.6143	Mitochondria	0.6520	-	0.8434	+	0.9249	+	0.9536	-	0.9200	-	0.8500	+	0.7776	-	0.5953	-	0.6849	+	0.6677	-	1.0000	-	0.8241	-
renshen_071	Ginsenoyne B	O[C@@H](CC#CC#C[C@H](O)C=C)[C@@H](Cl)CCCCCC=C	Renshen	294.816	Book: Chemical Components of Source Plants in Traditional Chinese Medicine (ISBN: 9787030235534)	167	U.S. Patent Application No. 15/573,583.	1e-06	0.3	0.0714919	N/A	3.04	2	2	9	In domain	+	0.9156	-	0.6722	+	0.9579	-	0.7000	Mitochondria	0.7088	-	0.8567	+	0.9117	+	0.9315	-	0.9400	-	0.8250	-	0.8401	-	0.8786	-	0.8047	+	0.5298	-	0.8027	-	0.7304	-
gancao_020	Gancaonin X	COc1ccc([C@H]2COc3cc4OC(C)(C)C=Cc4cc3C2)c(O)c1	Gancao	338.397	Book: Chemical Components of Source Plants in Traditional Chinese Medicine (ISBN: 9787030235534)	167	U.S. Patent Application No. 15/573,583.	1e-06	0.3429	0.0711915	N/A	4.30	4	1	2	In domain	+	0.9948	+	0.9163	+	0.9143	-	0.6571	Mitochondria	0.8262	-	0.8603	+	0.9199	+	0.9780	-	0.9400	-	0.7500	+	0.8975	-	0.4923	+	0.7758	+	0.6599	+	0.5918	+	0.3827	+
gancao_076	4’-0-Methylglabridin	COc1ccc([C@@H]2COc3c(C2)ccc4OC(C)(C)C=Cc34)c(O)c1	Gancao	338.397	Book: Chemical Components of Source Plants in Traditional Chinese Medicine (ISBN: 9787030235534)	167	U.S. Patent Application No. 15/573,583.	1e-06	0.3429	0.0711915	N/A	4.30	4	1	2	In domain	+	0.9948	+	0.9118	+	0.9143	-	0.6571	Mitochondria	0.8262	-	0.8598	+	0.9062	+	0.9780	-	0.9400	-	0.7500	+	0.8601	-	0.4794	+	0.6380	+	0.6690	+	0.5918	+	0.3827	+
MOL004910	Glabranin	CC(=CCc1c(O)cc(O)c2C(=O)C[C@H](Oc12)c3ccccc3)C	Gancao	324.37	Database: TCMSP (http://tcmspnw.com)	167	U.S. Patent Application No. 15/573,583.	1e-06	0.3286	0.0711727	N/A	4.31	4	2	3	In domain	+	0.9942	+	0.8450	-	0.4500	-	0.6714	Mitochondria	0.7746	-	0.7307	+	0.8946	+	0.9575	-	0.9600	-	0.9000	+	0.6214	-	0.5050	-	0.8660	-	0.5201	-	0.7977	-	0.7912	+
gancao_007	3’-(3,3-Dimethylallyl)-kievitone	CC(=CCc1c(O)ccc([C@@H]2COc3c(CC=C(C)C)c(O)cc(O)c3C2=O)c1O)C	Gancao	424.486	Book: Chemical Components of Source Plants in Traditional Chinese Medicine (ISBN: 9787030235534)	167	U.S. Patent Application No. 15/573,583.	1e-06	0.4286	0.0709375	N/A	4.89	6	4	5	In domain	+	0.9951	-	0.6128	-	0.3241	-	0.5714	Mitochondria	0.8287	-	0.7086	+	0.9074	+	0.9318	-	0.8800	-	0.9000	+	0.8702	+	0.6029	-	0.6823	+	0.5591	+	0.5973	-	0.7963	-
MOL002844	Pinocembrin	Oc1cc(O)c2C(=O)C[C@H](Oc2c1)c3ccccc3	Gancao	256.253	Database: TCMSP (http://tcmspnw.com)	167	U.S. Patent Application No. 15/573,583.	1e-06	0.2571	0.0704887	N/A	2.80	4	2	1	In domain	+	0.9936	+	0.5248	-	0.5263	-	0.7429	Mitochondria	0.7583	-	1.0000	+	0.9604	+	0.9480	-	0.9200	-	0.9500	-	0.8313	-	0.8983	-	0.9692	-	0.5805	-	1.0000	-	0.7429	+
MOL000391	Ononin	COc1ccc(cc1)C2=COc3cc(O[C@@H]4O[C@H](CO)[C@@H](O)[C@H](O)[C@H]4O)ccc3C2=O	Gancao	430.405	Database: TCMSP (http://tcmspnw.com)	167	U.S. Patent Application No. 15/573,583.	1e-06	0.4286	0.069962	N/A	0.65	9	4	5	In domain	-	0.4104	-	0.8314	-	0.9420	-	0.5714	Mitochondria	0.6190	-	0.6943	+	0.9426	+	0.9740	-	0.9200	-	0.8000	+	0.5863	-	0.6823	-	0.8985	+	0.6184	-	1.0000	-	0.8291	-
MOL001696	Morusin	CC(=CCC1=C(Oc2c3C=CC(C)(C)Oc3cc(O)c2C1=O)c4ccc(O)cc4O)C	Gancao	420.454	Database: TCMSP (http://tcmspnw.com)	167	U.S. Patent Application No. 15/573,583.	1e-06	0.4143	0.0692282	N/A	5.27	6	3	3	In domain	+	0.9677	+	0.4886	-	0.2364	-	0.5857	Mitochondria	0.7533	-	0.5650	+	0.7987	+	0.9068	-	0.9000	-	0.9750	+	0.8290	+	0.6882	+	0.6165	+	0.6360	-	0.5948	-	0.8144	-
MOL006967	beta-D-Ribofuranoside, xanthine-9	OC[C@H]1O[C@H]([C@H](O)[C@@H]1O)n2cnc3c(O)nc(O)nc23	Banxia	284.225	Database: TCMSP (http://tcmspnw.com)	250	U.S. Patent Application No. 15/573,583.	1e-06	0.1857	0.0687163	N/A	-2.15	10	5	2	In domain	+	0.9170	-	0.9703	+	0.9868	-	0.8143	Nucleus	0.4079	-	1.0000	+	0.9145	+	0.9500	-	1.0000	-	0.9500	-	0.9719	-	0.9219	-	0.9283	-	0.5833	-	1.0000	-	0.8440	-
gancao_022	Glisoflavanone	CC(=CCc1c(O)ccc([C@H]2COc3cc(O)c(CC=C(C)C)c(O)c3C2=O)c1O)C	Gancao	424.486	Book: Chemical Components of Source Plants in Traditional Chinese Medicine (ISBN: 9787030235534)	167	U.S. Patent Application No. 15/573,583.	1e-06	0.4143	0.0685707	N/A	4.89	6	4	5	In domain	+	0.9951	-	0.6206	-	0.3241	-	0.5857	Mitochondria	0.7965	-	0.7085	+	0.9147	+	0.9309	-	0.8800	-	0.9250	+	0.9357	+	0.6304	-	0.7392	+	0.5308	+	0.5973	-	0.7963	-
kushen_025	Kuraridin	COc1cc(O)c(C[C@@H](CC=C(C)C)C(=C)C)c(O)c1C(=O)\C=C\c2ccc(O)cc2O	Kushen	438.513	Book: Chemical Components of Source Plants in Traditional Chinese Medicine (ISBN: 9787030235534)	250	U.S. Patent Application No. 15/573,583.	1e-06	0.2857	0.0685234	N/A	5.50	6	4	9	In domain	+	0.9896	-	0.6267	+	0.8219	-	0.7143	Mitochondria	0.7746	-	0.5711	+	0.8020	+	0.8889	-	0.9200	-	0.9500	+	0.9360	+	0.7520	+	0.5556	+	0.6240	-	0.7819	-	0.8424	+
renshen_119	Panaxacol	CCCCCCC[C@@H](O)[C@H](O)CC#CC#CC(=O)CC	Renshen	278.387	Book: Chemical Components of Source Plants in Traditional Chinese Medicine (ISBN: 9787030235534)	167	U.S. Patent Application No. 15/573,583.	1e-06	0.2714	0.0684934	N/A	2.44	3	2	9	In domain	+	0.9068	+	0.5093	+	0.9066	-	0.7286	Mitochondria	0.7808	-	0.8515	+	0.9255	+	0.9395	-	0.9400	-	0.8250	-	0.7110	-	0.9053	-	0.7388	+	0.5103	-	1.0000	-	0.7925	-
gancao_055	Licopyranocoumarin	COc1c2CC[C@](C)(CO)Oc2cc3OC(=O)C(=Cc13)c4ccc(O)cc4O	Gancao	384.379	Book: Chemical Components of Source Plants in Traditional Chinese Medicine (ISBN: 9787030235534)	167	U.S. Patent Application No. 15/573,583.	1e-06	0.3714	0.0678843	N/A	2.96	7	3	3	In domain	+	0.9827	+	0.6575	-	0.4317	-	0.6286	Mitochondria	0.7502	-	0.7152	+	0.8790	+	0.8779	-	0.8400	-	0.8500	+	0.5985	-	0.4507	-	0.5687	+	0.6595	-	0.6141	-	0.7997	-
gancao_088	Sigmoidin B	CC(=CCc1cc(cc(O)c1O)[C@@H]2CC(=O)c3c(O)cc(O)cc3O2)C	Gancao	356.369	Book: Chemical Components of Source Plants in Traditional Chinese Medicine (ISBN: 9787030235534)	167	U.S. Patent Application No. 15/573,583.	1e-06	0.3429	0.0676012	N/A	3.72	6	4	3	In domain	+	0.9908	+	0.5890	-	0.3614	-	0.6571	Mitochondria	0.6544	+	0.5546	+	0.9088	+	0.9806	-	0.8800	-	0.8750	+	0.7592	-	0.6987	-	0.8136	+	0.5533	-	0.7979	-	0.8017	-
gancao_095	Uralenin	CC(=CCc1cc(cc(O)c1O)[C@@H]2CC(=O)c3c(O)cc(O)cc3O2)C	Gancao	356.369	Book: Chemical Components of Source Plants in Traditional Chinese Medicine (ISBN: 9787030235534)	167	U.S. Patent Application No. 15/573,583.	1e-06	0.3429	0.0676012	N/A	3.72	6	4	3	In domain	+	0.9908	+	0.5890	-	0.3614	-	0.6571	Mitochondria	0.6544	+	0.5546	+	0.9088	+	0.9806	-	0.8800	-	0.8750	+	0.7592	-	0.6987	-	0.8136	+	0.5533	-	0.7979	-	0.8017	-
renshen_120	Panaxadiol	CC1(C)CCC[C@](C)(O1)[C@H]2CC[C@@]3(C)[C@H]2[C@@H](O)C[C@H]4[C@@]5(C)CC[C@@H](O)C(C)(C)[C@H]5CC[C@]34C	Renshen	460.732	Book: Chemical Components of Source Plants in Traditional Chinese Medicine (ISBN: 9787030235534)	167	U.S. Patent Application No. 15/573,583.	1e-06	0.4429	0.0675374	N/A	6.74	3	2	1	In domain	+	0.9865	-	0.5782	+	0.9105	-	0.5571	Mitochondria	0.7015	-	0.5794	+	0.8743	+	0.9353	-	0.9800	-	0.7500	+	0.6353	-	0.6483	-	0.8292	+	0.7059	-	0.6131	-	0.6560	-
renshen_127	Protopanaxadiol	CC(=CCC[C@](C)(O)[C@H]1CC[C@]2(C)[C@@H]1[C@@H](O)C[C@@H]3[C@@]4(C)CC[C@H](O)C(C)(C)[C@@H]4CC[C@@]23C)C	Renshen	460.732	Book: Chemical Components of Source Plants in Traditional Chinese Medicine (ISBN: 9787030235534)	167	U.S. Patent Application No. 15/573,583.	1e-06	0.4429	0.0675374	N/A	6.50	3	3	4	In domain	+	0.9896	-	0.5776	-	0.7100	-	0.5571	Mitochondria	0.6200	-	0.5766	+	0.8571	+	0.9583	-	1.0000	-	0.6250	+	0.8440	-	0.5666	-	0.8567	+	0.6714	-	0.5811	-	0.7340	-
renshen_121	Panaxatriol	CC1(C)CCC[C@](C)(O1)[C@H]2CC[C@]3(C)[C@@H]2[C@H](O)C[C@@H]4[C@@]5(C)CC[C@H](O)C(C)(C)[C@@H]5[C@@H](O)C[C@@]34C	Renshen	476.731	Book: Chemical Components of Source Plants in Traditional Chinese Medicine (ISBN: 9787030235534)	167	U.S. Patent Application No. 15/573,583.	1e-06	0.4571	0.0673635	N/A	5.71	4	3	1	In domain	+	0.9865	-	0.6408	+	0.8573	-	0.5429	Mitochondria	0.6863	-	0.5771	+	0.8727	+	0.9244	-	0.9800	-	0.7571	-	0.6088	-	0.6369	-	0.6899	+	0.7108	-	0.6131	-	0.6560	-
MOL004328	naringenin	Oc1ccc(cc1)[C@@H]2CC(=O)c3c(O)cc(O)cc3O2	Gancao	272.253	Database: TCMSP (http://tcmspnw.com)	167	U.S. Patent Application No. 15/573,583.	1e-06	0.2571	0.0663464	N/A	2.51	5	3	1	In domain	+	0.9936	+	0.5424	-	0.5263	-	0.7429	Mitochondria	0.7583	-	1.0000	+	0.9413	+	0.9480	-	0.9200	-	0.9500	-	0.8076	-	0.8953	-	0.9501	-	0.5390	-	1.0000	-	0.7429	+
MOL004328	naringenin	Oc1ccc(cc1)[C@@H]2CC(=O)c3c(O)cc(O)cc3O2	Zhishi	272.253	Database: TCMSP (http://tcmspnw.com)	167	U.S. Patent Application No. 15/573,583.	1e-06	0.2571	0.0663464	N/A	2.51	5	3	1	In domain	+	0.9936	+	0.5424	-	0.5263	-	0.7429	Mitochondria	0.7583	-	1.0000	+	0.9413	+	0.9480	-	0.9200	-	0.9500	-	0.8076	-	0.8953	-	0.9501	-	0.5390	-	1.0000	-	0.7429	+
gancao_039	3-Hydroxyglabrol	CC(=CCc1cc(ccc1O)[C@H]2Oc3c(CC=C(C)C)c(O)ccc3C(=O)[C@@H]2O)C	Gancao	408.487	Book: Chemical Components of Source Plants in Traditional Chinese Medicine (ISBN: 9787030235534)	167	U.S. Patent Application No. 15/573,583.	1e-06	0.3857	0.0663375	N/A	4.79	5	3	5	In domain	+	0.9950	+	0.5448	-	0.4304	-	0.6143	Mitochondria	0.7353	-	0.7169	+	0.8812	+	0.9232	-	0.9600	-	0.9000	+	0.9435	+	0.7405	-	0.8437	+	0.5335	-	1.0000	-	0.7126	-
kushen_007	2-n-Heneicosyl-5,7-dihydroxy-6,8-dimethyl chromone	CCCCCCCCCCCCCCCCCCCCCC1=CC(=O)c2c(O)c(C)c(O)c(C)c2O1	Kushen	500.753	Book: Chemical Components of Source Plants in Traditional Chinese Medicine (ISBN: 9787030235534)	250	U.S. Patent Application No. 15/573,583.	1e-06	0.3143	0.0660133	N/A	9.80	4	2	20	Warning	+	0.9859	-	0.7647	+	0.8266	-	0.6857	Mitochondria	0.4980	+	0.5734	+	0.7713	+	0.9189	-	0.7000	-	0.8250	-	0.5053	-	0.4585	-	0.7411	-	0.5178	-	0.5690	-	0.8293	+
gancao_048	Kaozonol L	CC(=CCc1c(O)c(CC=C(C)C)c2OC=C(C(=O)c2c1O)c3ccc(O)c4C=CC(C)(C)Oc34)C	Gancao	488.571	Book: Chemical Components of Source Plants in Traditional Chinese Medicine (ISBN: 9787030235534)	167	U.S. Patent Application No. 15/573,583.	1e-06	0.4571	0.065731	N/A	6.78	6	3	5	In domain	+	0.9677	-	0.7223	-	0.2364	-	0.5429	Mitochondria	0.7814	-	0.5689	+	0.8868	+	0.8875	-	0.9000	-	0.8750	+	0.9578	+	0.8359	-	0.6029	+	0.6339	-	0.5948	-	0.8144	-
gancao_030	Glycyrrhisoflavanone	COc1cc(O)cc2OC[C@@H](C(=O)c12)c3cc(O)c4OC(C)(C)C=Cc4c3	Gancao	368.38	Book: Chemical Components of Source Plants in Traditional Chinese Medicine (ISBN: 9787030235534)	167	U.S. Patent Application No. 15/573,583.	1e-06	0.3429	0.0653972	N/A	3.65	6	2	2	In domain	+	0.9901	+	0.5597	+	0.7927	-	0.6571	Mitochondria	0.8358	-	0.8592	+	0.9145	+	0.9155	-	0.9200	-	0.9500	+	0.6123	-	0.5086	-	0.5928	+	0.6433	-	0.6021	-	0.7988	+
renshen_072	Ginsenoyne C	O[C@H](CC#CC#C[C@H](O)C=C)[C@@H](O)CCCCCC=C	Renshen	276.371	Book: Chemical Components of Source Plants in Traditional Chinese Medicine (ISBN: 9787030235534)	167	U.S. Patent Application No. 15/573,583.	1e-06	0.2571	0.0653578	N/A	1.79	3	3	9	In domain	+	0.8364	-	0.7353	-	0.3338	-	0.7429	Mitochondria	0.7124	-	0.8554	+	0.9271	+	0.9510	-	0.9600	-	0.8750	-	0.9162	-	0.9009	-	0.8347	-	0.5000	-	0.7982	-	0.7276	-
renshen_128	Protopanaxatriol	CC(=CCC[C@@](C)(O)[C@H]1CC[C@]2(C)[C@@H]1[C@H](O)C[C@@H]3[C@@]4(C)CC[C@H](O)C(C)(C)[C@@H]4[C@@H](O)C[C@@]23C)C	Renshen	476.731	Book: Chemical Components of Source Plants in Traditional Chinese Medicine (ISBN: 9787030235534)	167	U.S. Patent Application No. 15/573,583.	1e-06	0.4429	0.0652708	N/A	5.47	4	4	4	In domain	+	0.9896	-	0.6363	-	0.9034	-	0.5571	Mitochondria	0.6300	-	0.5760	+	0.8571	+	0.9209	-	1.0000	-	0.6750	+	0.6781	-	0.5490	-	0.6962	+	0.6797	-	0.5811	-	0.7340	-
MOL002903	(R)-Canadine	COc1ccc2C[C@H]3N(CCc4cc5OCOc5cc34)Cc2c1OC	Huanglian	339.385	Database: TCMSP (http://tcmspnw.com)	334	U.S. Patent Application No. 15/573,583.	1e-06	0.1571	0.065043	N/A	3.09	5	0	2	In domain	+	0.9809	+	0.8914	+	0.9939	-	0.8429	Mitochondria	0.4940	-	0.8714	+	0.9469	+	0.9389	-	0.9000	+	0.5250	+	0.8262	-	0.5493	-	0.7109	+	0.5963	-	0.6129	+	0.7342	+
gancao_003	Corylifolinin	CC(=CCc1c(O)ccc(C(=O)\C=C\c2ccc(O)cc2)c1O)C	Gancao	324.37	Book: Chemical Components of Source Plants in Traditional Chinese Medicine (ISBN: 9787030235534)	167	U.S. Patent Application No. 15/573,583.	1e-06	0.3	0.0649781	N/A	4.21	4	3	5	In domain	+	0.9875	+	0.7341	-	0.3151	-	0.7000	Mitochondria	0.8210	+	0.5634	+	0.8774	+	0.9441	-	0.8800	-	0.9588	+	0.8193	-	0.6138	-	0.8545	-	0.5510	-	0.7861	-	0.8509	+
MOL004881	(E)-1-[2,4-dihydroxy-3-(3-methylbut-2-enyl)phenyl]-3-(2,4-dihydroxyphenyl)prop-2-en-1-one	CC(=CCc1c(O)ccc(C(=O)\C=C\c2ccc(O)cc2O)c1O)C	Gancao	340.37	Database: TCMSP (http://tcmspnw.com)	167	U.S. Patent Application No. 15/573,583.	1e-06	0.3143	0.0648755	N/A	3.91	5	4	5	In domain	+	0.9875	+	0.6757	-	0.3151	-	0.6857	Mitochondria	0.8210	+	0.5727	+	0.8368	+	0.9441	-	0.8800	-	0.9588	+	0.8727	-	0.6321	-	0.7488	-	0.5084	-	0.7861	-	0.8509	+
MOL004805	(2S)-2-[4-hydroxy-3-(3-methylbut-2-enyl)phenyl]-8,8-dimethyl-2,3-dihydropyrano[2,3-f]chromen-4-one	CC(=CCc1cc(ccc1O)[C@@H]2CC(=O)c3ccc4OC(C)(C)C=Cc4c3O2)C	Gancao	390.472	Database: TCMSP (http://tcmspnw.com)	167	U.S. Patent Application No. 15/573,583.	1e-06	0.3571	0.0642522	N/A	5.79	4	1	3	In domain	+	0.9879	+	0.5258	+	0.8267	-	0.6429	Mitochondria	0.8371	-	1.0000	+	0.8830	+	0.9283	-	0.9800	-	0.9500	+	0.9680	+	0.8297	-	0.5459	+	0.6187	-	0.8024	-	0.7542	-
kushen_033	Kushenol D	COc1cc(O)ccc1\C=C\C(=O)c2c(O)c(C[C@@H](CC=C(C)C)C(=C)C)c(O)cc2OC	Kushen	452.539	Book: Chemical Components of Source Plants in Traditional Chinese Medicine (ISBN: 9787030235534)	250	U.S. Patent Application No. 15/573,583.	1e-06	0.2714	0.063076	N/A	5.81	6	3	10	In domain	+	0.9896	-	0.6190	+	0.8219	-	0.7286	Mitochondria	0.7746	-	1.0000	+	0.7822	+	0.8889	-	0.9200	-	0.9500	+	0.9244	+	0.8260	+	0.5387	+	0.6221	-	0.7819	-	0.8424	+
MOL006616	kushenol D	COc1cc(O)ccc1\C=C\C(=O)c2c(O)c(C[C@H](CC=C(C)C)C(=C)C)c(O)cc2OC	Kushen	452.539	Database: TCMSP (http://tcmspnw.com)	250	U.S. Patent Application No. 15/573,583.	1e-06	0.2714	0.063076	N/A	5.81	6	3	10	In domain	+	0.9896	-	0.6190	+	0.8219	-	0.7286	Mitochondria	0.7746	-	1.0000	+	0.7822	+	0.8889	-	0.9200	-	0.9500	+	0.9244	+	0.8260	+	0.5387	+	0.6221	-	0.7819	-	0.8424	+
gancao_032	Glycyrrhiza-tlavonol A	CC1(C)Oc2ccc(cc2C[C@H]1O)C3=C(O)C(=O)c4c(O)cc(O)cc4O3	Gancao	370.353	Book: Chemical Components of Source Plants in Traditional Chinese Medicine (ISBN: 9787030235534)	167	U.S. Patent Application No. 15/573,583.	1e-06	0.3286	0.0623361	N/A	2.65	7	4	1	In domain	+	0.9817	-	0.5791	+	0.8311	-	0.6714	Mitochondria	0.6746	+	0.5797	+	0.8075	+	0.9271	-	0.8000	-	0.9750	+	0.6827	-	0.6495	+	0.5154	+	0.6804	-	0.5940	-	0.7891	+
MOL000497	licochalcone a	COc1cc(O)c(cc1\C=C\C(=O)c2ccc(O)cc2)C(C)(C)C=C	Gancao	338.397	Database: TCMSP (http://tcmspnw.com)	167	U.S. Patent Application No. 15/573,583.	1e-06	0.3	0.0622848	N/A	4.47	4	2	6	In domain	+	0.9922	+	0.7648	+	0.8995	-	0.7000	Mitochondria	0.8988	-	0.8543	+	0.8522	+	0.9400	-	0.9600	-	0.9750	+	0.7427	-	0.5300	-	0.7497	+	0.5635	-	1.0000	-	0.8204	+
renshen_101	1-Methoxy-(9R,10S)-epoxyheptadecan-4,6-diyn-3-one	CCCCCCC[C@@H]1O[C@@H]1CC#CC#CC(=O)CCOC	Renshen	290.397	Book: Chemical Components of Source Plants in Traditional Chinese Medicine (ISBN: 9787030235534)	167	U.S. Patent Application No. 15/573,583.	1e-06	0.2571	0.0622009	N/A	3.12	3	0	10	In domain	+	0.9512	+	0.6468	+	0.9802	-	0.7429	Mitochondria	0.6640	-	0.8515	+	0.8455	+	0.9518	-	0.9000	-	0.6750	-	0.5759	-	0.6901	-	0.6234	+	0.5968	-	0.6180	-	0.8085	-
MOL004993	8-prenylated eriodictyol	CC(=CCc1c(O)cc(O)c2C(=O)C[C@@H](Oc12)c3ccc(O)c(O)c3)C	Gancao	356.369	Database: TCMSP (http://tcmspnw.com)	167	U.S. Patent Application No. 15/573,583.	1e-06	0.3143	0.0619629	N/A	3.72	6	4	3	In domain	+	0.9908	+	0.7660	-	0.3614	-	0.6857	Mitochondria	0.6544	-	0.5767	+	0.9236	+	0.9806	-	0.8800	-	0.8750	-	0.4892	-	0.7235	-	0.8470	+	0.5152	-	0.7979	-	0.8017	-
MOL000107	quercertin,3-o-beta-d-glucopyranoside	OC[C@@H]1O[C@H](OC2=C(Oc3cc(O)cc(O)c3C2=O)c4ccc(O)c(O)c4)[C@@H](O)[C@H](O)[C@H]1O	Qinghao	464.376	Database: TCMSP (http://tcmspnw.com)	250	U.S. Patent Application No. 15/573,583.	1e-06	0.2714	0.0614682	N/A	-0.54	12	8	4	Warning	+	0.6468	-	0.9010	-	0.9152	-	0.7286	Mitochondria	0.6068	+	0.5930	+	0.9271	+	0.9265	-	0.7800	-	0.7750	-	0.6488	-	0.6240	-	0.8086	+	0.6155	-	0.6709	-	0.8582	-
MOL000109	quercetin,3-o-glucoside	OC[C@H]1O[C@H](OC2=C(Oc3cc(O)cc(O)c3C2=O)c4ccc(O)c(O)c4)[C@H](O)[C@@H](O)[C@@H]1O	Qinghao	464.376	Database: TCMSP (http://tcmspnw.com)	250	U.S. Patent Application No. 15/573,583.	1e-06	0.2714	0.0614682	N/A	-0.54	12	8	4	Warning	+	0.6468	-	0.9010	-	0.9152	-	0.7286	Mitochondria	0.6068	+	0.5930	+	0.9271	+	0.9265	-	0.7800	-	0.7750	-	0.6488	-	0.6240	-	0.8086	+	0.6155	-	0.6709	-	0.8582	-
MOL000112	quercetin-3-o-galactopyranoside	OC[C@H]1O[C@H](OC2=C(Oc3cc(O)cc(O)c3C2=O)c4ccc(O)c(O)c4)[C@H](O)[C@@H](O)[C@H]1O	Qinghao	464.376	Database: TCMSP (http://tcmspnw.com)	250	U.S. Patent Application No. 15/573,583.	1e-06	0.2714	0.0614682	N/A	-0.54	12	8	4	Warning	+	0.6468	-	0.9010	-	0.9152	-	0.7286	Mitochondria	0.6068	+	0.5930	+	0.9271	+	0.9265	-	0.7800	-	0.7750	-	0.6488	-	0.6240	-	0.8086	+	0.6155	-	0.6709	-	0.8582	-
MOL004368	Hyperin	OC[C@H]1O[C@@H](OC2=C(Oc3cc(O)cc(O)c3C2=O)c4ccc(O)c(O)c4)[C@H](O)[C@@H](O)[C@H]1O	Qinghao	464.376	Database: TCMSP (http://tcmspnw.com)	250	U.S. Patent Application No. 15/573,583.	1e-06	0.2714	0.0614682	N/A	-0.54	12	8	4	Warning	+	0.6468	-	0.9010	-	0.9152	-	0.7286	Mitochondria	0.6068	+	0.5930	+	0.9271	+	0.9265	-	0.7800	-	0.7750	-	0.6488	-	0.6240	-	0.8086	+	0.6155	-	0.6709	-	0.8582	-
qinghao_084	Isoquercitrin	OC[C@H]1O[C@@H](OC2=C(Oc3cc(O)cc(O)c3C2=O)c4ccc(O)c(O)c4)[C@H](O)[C@@H](O)[C@@H]1O	Qinghao	464.376	Book: Chemical Components of Source Plants in Traditional Chinese Medicine (ISBN: 9787030235534)	250	U.S. Patent Application No. 15/573,583.	1e-06	0.2714	0.0614682	N/A	-0.54	12	8	4	Warning	+	0.6468	-	0.9010	-	0.9152	-	0.7286	Mitochondria	0.6068	+	0.5930	+	0.9271	+	0.9265	-	0.7800	-	0.7750	-	0.6488	-	0.6240	-	0.8086	+	0.6155	-	0.6709	-	0.8582	-
MOL002343	tetrandrine	COc1ccc2C[C@@H]3N(C)CCc4cc(OC)c(OC)c(Oc5cc6[C@H](Cc7ccc(Oc1c2)cc7)N(C)CCc6cc5OC)c34	Huanglian	622.75	Database: TCMSP (http://tcmspnw.com)	334	U.S. Patent Application No. 15/573,583.	1e-06	0.2714	0.0612369	N/A	7.16	8	0	4	Warning	+	0.9824	+	0.7988	+	0.9945	-	0.7286	Lysosomes	0.4588	-	0.8576	+	0.9464	+	0.9495	-	0.8400	-	0.5750	+	1.0000	+	0.9597	+	0.5552	+	0.6690	+	0.7865	+	0.7650	-
lianzixin_006	O-Methyl-corypalline	COc1cc2CCN(C)Cc2cc1OC	Lianzixin	207.269	Book: Chemical Components of Source Plants in Traditional Chinese Medicine (ISBN: 9787030235534)	42	U.S. Patent Application No. 15/573,583.	1e-06	0.7143	0.0608929	N/A	1.69	3	0	2	In domain	+	0.9946	+	0.9737	+	1.0000	+	0.7143	Mitochondria	0.5755	-	0.8568	+	0.9473	+	0.9577	-	0.9600	+	0.6750	-	0.8923	-	0.9643	+	0.5306	-	0.5884	+	0.7753	+	0.8760	-
kushen_022	Kosamol V	COc1cc(ccc1O)[C@@H]2CC(=O)c3c(O)c(CC=C(C)C)c(O)cc3O2	Kushen	370.396	Book: Chemical Components of Source Plants in Traditional Chinese Medicine (ISBN: 9787030235534)	250	U.S. Patent Application No. 15/573,583.	1e-06	0.2143	0.0608509	N/A	4.03	6	3	4	In domain	+	0.9942	+	0.5262	-	0.3654	-	0.7857	Mitochondria	0.5708	-	0.5818	+	0.9112	+	0.9251	-	0.9600	-	0.9000	+	0.5589	-	0.6010	-	0.8012	+	0.5723	-	0.7977	-	0.7912	-
gancao_101	Uralstilhene	CC(=CCOc1cc(O)cc(CCc2ccc(O)c(O)c2)c1CC=C(C)C)C	Gancao	382.493	Book: Chemical Components of Source Plants in Traditional Chinese Medicine (ISBN: 9787030235534)	167	U.S. Patent Application No. 15/573,583.	1e-06	0.3286	0.0603576	N/A	5.44	4	3	8	In domain	+	0.9909	+	0.5394	+	0.9156	-	0.6714	Mitochondria	0.9342	-	0.8551	+	0.9290	+	0.9328	-	0.9400	-	0.6750	+	0.8953	+	0.8191	-	0.7249	+	0.5209	+	0.6000	+	0.3868	-
qinghao_092	6-Methoxykaempferol 3-O-glycoside	COc1c(O)cc2OC(=C(O[C@@H]3O[C@H](CO)[C@@H](O)[C@H](O)[C@H]3O)C(=O)c2c1O)c4ccc(O)cc4	Qinghao	478.403	Book: Chemical Components of Source Plants in Traditional Chinese Medicine (ISBN: 9787030235534)	250	U.S. Patent Application No. 15/573,583.	1e-06	0.2714	0.059666	N/A	-0.24	12	7	5	In domain	+	0.6871	-	0.8852	-	0.9420	-	0.7286	Mitochondria	0.6190	+	0.5838	+	0.8873	+	0.9740	-	0.8400	-	0.8000	-	0.4495	-	0.5862	-	0.7160	+	0.6208	-	0.8485	-	0.8501	-
MOL004988	Kanzonol F	COc1c(CC=C(C)C)c(O)cc2OC[C@@H]3[C@H](Oc4cc5OC(C)(C)C=Cc5cc34)c12	Gancao	420.498	Database: TCMSP (http://tcmspnw.com)	167	U.S. Patent Application No. 15/573,583.	1e-06	0.3571	0.0596642	N/A	5.70	5	1	3	In domain	+	0.9948	+	0.7145	+	0.9448	-	0.6429	Mitochondria	0.7470	-	1.0000	+	0.8563	+	0.9090	-	0.9400	-	0.9000	+	0.9798	+	0.7901	+	0.6020	+	0.6565	+	0.5918	+	0.3827	+
MOL005100	5,7-dihydroxy-2-(3-hydroxy-4-methoxyphenyl)chroman-4-one	COc1ccc(cc1O)[C@H]2CC(=O)c3c(O)cc(O)cc3O2	Kushen	302.279	Database: TCMSP (http://tcmspnw.com)	250	U.S. Patent Application No. 15/573,583.	1e-06	0.1714	0.0596368	N/A	2.52	6	3	2	In domain	+	0.9936	+	0.8207	-	0.5000	-	0.8286	Mitochondria	0.6551	-	0.5904	+	0.9581	+	0.9701	-	0.9200	-	0.9000	-	0.8294	-	0.9167	-	0.9026	+	0.5487	-	1.0000	-	0.7429	+
fuling_015	3 beta-p-Hydroxybenzoyldehydrotumulosic acid	CC(C)C(=C)CC[C@H]([C@H]1[C@H](O)C[C@@]2(C)C3=CC[C@H]4C(C)(C)[C@H](CC[C@]4(C)C3=CC[C@]12C)OC(=O)c5ccc(O)cc5)C(=O)O	Fuling	604.816	Book: Chemical Components of Source Plants in Traditional Chinese Medicine (ISBN: 9787030235534)	250	U.S. Patent Application No. 15/573,583.	1e-06	0.3429	0.0596287	N/A	8.11	5	3	8	In domain	+	0.9948	-	0.7649	-	0.8390	-	0.6571	Mitochondria	0.8772	-	0.5727	+	0.7992	-	0.5997	-	0.9000	-	0.7750	+	0.9736	+	0.7941	+	0.6114	+	0.7061	-	0.6423	-	0.8608	-
gancao_014	Gancaonin C	C\C(=C/Cc1c(O)cc(O)c2C(=O)C(=COc12)c3ccc(O)cc3)\CO	Gancao	354.353	Book: Chemical Components of Source Plants in Traditional Chinese Medicine (ISBN: 9787030235534)	167	U.S. Patent Application No. 15/573,583.	1e-06	0.3	0.0594801	N/A	3.06	6	4	4	In domain	+	0.9766	-	0.5780	-	0.5000	-	0.7000	Mitochondria	0.7170	+	0.5734	+	0.9008	+	0.9415	-	0.6600	-	0.8000	+	0.7015	-	0.5579	-	0.8088	+	0.5470	-	0.5826	-	0.8345	-
MOL004959	1-Methoxyphaseollidin	COc1cc(O)cc2OC[C@@H]3[C@@H](Oc4c(CC=C(C)C)c(O)ccc34)c12	Gancao	354.396	Database: TCMSP (http://tcmspnw.com)	167	U.S. Patent Application No. 15/573,583.	1e-06	0.3	0.0594729	N/A	4.22	5	2	3	In domain	+	0.9959	+	0.8125	+	0.8693	-	0.7000	Mitochondria	0.8005	-	1.0000	+	0.9232	+	0.9293	-	0.9400	-	0.9250	+	0.8636	-	0.4295	-	0.5999	+	0.6023	-	0.6036	+	0.4888	-
kushen_062	2-n-Pentacosyl-5,7-dihydroxy-6,8-dimethyl chromone	CCCCCCCCCCCCCCCCCCCCCCCCCC1=CC(=O)c2c(O)c(C)c(O)c(C)c2O1	Kushen	556.859	Book: Chemical Components of Source Plants in Traditional Chinese Medicine (ISBN: 9787030235534)	250	U.S. Patent Application No. 15/573,583.	1e-06	0.3143	0.0593622	N/A	11.36	4	2	24	Warning	+	0.9859	-	0.7887	+	0.8266	-	0.6857	Mitochondria	0.4980	+	0.5724	+	0.7713	+	0.9189	-	0.7000	-	0.8250	+	0.5836	+	0.5779	-	0.7411	-	0.5178	-	0.5690	-	0.8293	+
MOL004945	(2S)-7-hydroxy-2-(4-hydroxyphenyl)-8-(3-methylbut-2-enyl)chroman-4-one	CC(=CCc1c(O)ccc2C(=O)C[C@H](Oc12)c3ccc(O)cc3)C	Gancao	324.37	Database: TCMSP (http://tcmspnw.com)	167	U.S. Patent Application No. 15/573,583.	1e-06	0.2714	0.0587836	N/A	4.31	4	2	3	In domain	+	0.9954	+	0.8195	-	0.5358	-	0.7286	Mitochondria	0.8521	-	0.5944	+	0.8398	+	0.9484	-	0.9800	-	0.9250	+	0.6989	-	0.6002	-	0.7546	+	0.5456	-	0.8006	-	0.7235	-
MOL002377	Kaempferol-3-arabofuranoside	OC[C@@H]1O[C@H](OC2=C(Oc3cc(O)cc(O)c3C2=O)c4ccc(O)cc4)[C@H](O)[C@H]1O	Renshen	418.351	Database: TCMSP (http://tcmspnw.com)	250	U.S. Patent Application No. 15/573,583.	1e-06	0.2286	0.0574707	N/A	0.39	10	6	4	In domain	+	0.6347	-	0.8928	-	0.6557	-	0.7714	Mitochondria	0.6970	+	0.5813	+	0.8845	+	0.9316	-	0.8400	-	0.8000	-	0.5360	-	0.5733	-	0.7895	+	0.5980	-	0.6762	-	0.8575	-
MOL000273	(2R)-2-[(3S,5R,10S,13R,14R,16R,17R)-3,16-dihydroxy-4,4,10,13,14-pentamethyl-2,3,5,6,12,15,16,17-octahydro-1H-cyclopenta[a]phenanthren-17-yl]-6-methylhept-5-enoic acid	CC(=CCC[C@H]([C@H]1[C@H](O)C[C@@]2(C)C3=CC[C@H]4C(C)(C)[C@@H](O)CC[C@]4(C)C3=CC[C@]12C)C(=O)O)C	Fuling	470.684	Database: TCMSP (http://tcmspnw.com)	250	U.S. Patent Application No. 15/573,583.	1e-06	0.2571	0.0574492	N/A	6.29	3	3	5	In domain	+	0.9923	+	0.7093	-	0.9493	-	0.7429	Mitochondria	0.8428	-	0.8613	+	0.8590	-	0.2360	-	0.9800	-	0.6250	+	0.9169	-	0.4637	-	0.6681	+	0.6472	-	0.8398	-	0.8724	-
kushen_016	Kosamol A	CC(=CC[C@H](Cc1c(O)c(CCC(C)(C)O)c(O)c2C(=O)[C@H](O)[C@H](Oc12)c3ccc(O)cc3O)C(=C)C)C	Kushen	526.618	Book: Chemical Components of Source Plants in Traditional Chinese Medicine (ISBN: 9787030235534)	250	U.S. Patent Application No. 15/573,583.	1e-06	0.2857	0.0570592	N/A	4.98	8	6	9	In domain	+	0.9920	-	0.7842	+	0.8319	-	0.7143	Mitochondria	0.6535	+	0.5677	+	0.7807	+	0.9103	-	0.9800	-	0.9000	+	0.9472	+	0.6626	+	0.6544	+	0.6762	-	1.0000	-	0.8159	-
qinghao_041	Cinaroside	OC[C@H]1O[C@@H](Oc2cc(O)c3C(=O)C=C(Oc3c2)c4ccc(O)c(O)c4)[C@H](O)[C@@H](O)[C@@H]1O	Qinghao	448.377	Book: Chemical Components of Source Plants in Traditional Chinese Medicine (ISBN: 9787030235534)	250	U.S. Patent Application No. 15/573,583.	1e-06	0.2429	0.0569764	N/A	-0.24	11	7	4	In domain	+	0.6468	-	0.9372	-	0.9152	-	0.7571	Mitochondria	0.6068	+	0.5978	+	0.9622	+	0.9265	-	0.7800	-	0.7750	-	0.5553	-	0.8236	-	0.8293	+	0.5518	-	0.6709	-	0.8582	-
MOL004829	Glepidotin B	CC(=CCc1c(O)cc(O)c2C(=O)[C@H](O)[C@H](Oc12)c3ccccc3)C	Gancao	340.37	Database: TCMSP (http://tcmspnw.com)	167	U.S. Patent Application No. 15/573,583.	1e-06	0.2714	0.0560204	N/A	3.28	5	3	3	In domain	+	0.9937	+	0.5710	-	0.3575	-	0.7286	Mitochondria	0.6291	-	0.7219	+	0.8670	+	0.9248	-	0.9400	-	0.9250	+	0.6058	-	0.4887	-	0.8800	-	0.5138	-	1.0000	-	0.7858	-
MOL009053	4-[(2S,3R)-5-[(E)-3-hydroxyprop-1-enyl]-7-methoxy-3-methylol-2,3-dihydrobenzofuran-2-yl]-2-methoxy-phenol	COc1cc(ccc1O)[C@H]2Oc3c(OC)cc(\C=C\CO)cc3[C@@H]2CO	Zhishi	358.385	Database: TCMSP (http://tcmspnw.com)	167	U.S. Patent Application No. 15/573,583.	1e-06	0.2857	0.0560077	N/A	2.62	6	3	6	In domain	+	0.9893	+	0.6050	+	0.8898	-	0.7143	Mitochondria	0.7034	-	0.8592	+	0.8276	+	0.9447	-	0.9800	-	0.9500	+	0.7561	+	0.6369	-	0.8423	+	0.5531	+	0.6095	-	0.6654	+
gancao_011	Formononetin-7-glucoside	COc1ccc(cc1)C2=CC(=O)c3ccc(O[C@@H]4O[C@H](CO)[C@@H](O)[C@H](O)[C@H]4O)cc3O2	Gancao	430.405	Book: Chemical Components of Source Plants in Traditional Chinese Medicine (ISBN: 9787030235534)	167	U.S. Patent Application No. 15/573,583.	1e-06	0.3429	0.0559729	N/A	0.65	9	4	5	In domain	-	0.4104	-	0.8429	-	0.8465	-	0.6571	Mitochondria	0.6557	-	0.5550	+	0.9163	+	0.9769	-	0.9200	-	0.8750	+	0.7381	-	0.5803	-	0.8218	+	0.5875	-	1.0000	-	0.8291	-
zhishi_003	Isolimonic acid (16->17)lactone	CC1(C)OC[C@]2([C@@H](O)CC(=O)O)[C@@H]3CC[C@]4(C)[C@H](OC(=O)[C@@H]5O[C@]45[C@@]3(C)C(=O)C[C@H]12)c6cocc6	Zhishi	488.527	Book: Chemical Components of Source Plants in Traditional Chinese Medicine (ISBN: 9787030235534)	167	U.S. Patent Application No. 15/573,583.	1e-06	0.3857	0.0554688	N/A	2.66	8	2	4	In domain	+	0.9395	-	0.7391	+	0.9494	-	0.6143	Mitochondria	0.7500	-	1.0000	-	0.3700	+	0.9208	-	0.9400	-	0.8402	+	0.9090	+	0.5773	+	0.5491	+	0.6779	-	1.0000	-	0.8311	+
qinghao_020	Astragalin	OC[C@H]1O[C@@H](OC2=C(Oc3cc(O)cc(O)c3C2=O)c4ccc(O)cc4)[C@H](O)[C@@H](O)[C@@H]1O	Qinghao	448.377	Book: Chemical Components of Source Plants in Traditional Chinese Medicine (ISBN: 9787030235534)	250	U.S. Patent Application No. 15/573,583.	1e-06	0.2286	0.0536221	N/A	-0.24	11	7	4	In domain	+	0.6347	-	0.9102	-	0.9152	-	0.7714	Mitochondria	0.6068	+	0.5869	+	0.8875	+	0.9265	-	0.8400	-	0.7750	-	0.5444	-	0.6120	-	0.7828	+	0.6012	-	0.6762	-	0.8575	-
MOL000278	Beta-Glucan	CO[C@H]1[C@H](O)[C@@H](CO)O[C@@H](O[C@H]2[C@H](O)[C@@H](CO)O[C@@H](O[C@@H]3[C@@H](O)[C@H](C)O[C@H](CO)[C@H]3O)[C@@H]2O)[C@@H]1O	Fuling	516.491	Database: TCMSP (http://tcmspnw.com)	250	U.S. Patent Application No. 15/573,583.	1e-06	0.2571	0.0523541	N/A	-5.85	15	9	8	Warning	-	0.8508	-	0.8617	+	0.8471	-	0.7429	Mitochondria	0.6821	-	0.8607	+	0.9169	+	0.9284	-	1.0000	-	0.9250	-	0.9776	-	0.7821	-	0.9303	-	0.5332	-	1.0000	-	0.8454	-
banxia_005	Daucosterol	CC[C@H](CC[C@@H](C)[C@H]1CC[C@H]2[C@@H]3CC=C4C[C@H](CC[C@]4(C)[C@H]3CC[C@]12C)O[C@@H]5O[C@H](CO)[C@@H](O)[C@H](O)[C@H]5O)C(C)C	Banxia	576.847	Book: Chemical Components of Source Plants in Traditional Chinese Medicine (ISBN: 9787030235534)	250	U.S. Patent Application No. 15/573,583.	1e-06	0.2857	0.0520907	N/A	5.85	6	4	9	In domain	-	0.6476	-	0.8381	+	0.8924	-	0.7143	Mitochondria	0.7468	-	0.5776	+	0.9074	+	0.8152	-	0.9612	-	0.6500	-	0.6871	+	0.6477	+	0.5534	+	0.7292	-	0.8025	-	0.8264	-
banxia_019	beta-Sitosterol-beta-D-glucoside	CC[C@H](CC[C@@H](C)[C@@H]1CC[C@H]2[C@@H]3CC=C4C[C@H](CC[C@]4(C)[C@H]3CC[C@]12C)O[C@@H]5O[C@H](CO)[C@@H](O)[C@H](O)[C@H]5O)C(C)C	Banxia	576.847	Book: Chemical Components of Source Plants in Traditional Chinese Medicine (ISBN: 9787030235534)	250	U.S. Patent Application No. 15/573,583.	1e-06	0.2857	0.0520907	N/A	5.85	6	4	9	In domain	-	0.6476	-	0.8381	+	0.8924	-	0.7143	Mitochondria	0.7468	-	0.5776	+	0.9074	+	0.8152	-	0.9612	-	0.6500	-	0.6871	+	0.6477	+	0.5534	+	0.7292	-	0.8025	-	0.8264	-
MOL000295	alexandrin	CC[C@H](CC[C@@H](C)[C@H]1CC[C@@H]2[C@H]3CC=C4C[C@@H](CC[C@]4(C)[C@@H]3CC[C@]12C)O[C@@H]5O[C@H](CO)[C@@H](O)[C@H](O)[C@H]5O)C(C)C	Fuling	576.847	Database: TCMSP (http://tcmspnw.com)	250	U.S. Patent Application No. 15/573,583.	1e-06	0.2857	0.0520907	N/A	5.85	6	4	9	In domain	-	0.6476	-	0.8381	+	0.8924	-	0.7143	Mitochondria	0.7468	-	0.5776	+	0.9074	+	0.8152	-	0.9612	-	0.6500	-	0.6871	+	0.6477	+	0.5534	+	0.7292	-	0.8025	-	0.8264	-
gancao_050	Licobicbalcone	COc1c(O)c(O)ccc1[C@@H]2[C@H](C(=O)c3ccc(O)cc3)C(=Cc4cc(O)c(O)c(OC)c24)C(=O)c5ccc(O)cc5	Gancao	570.543	Book: Chemical Components of Source Plants in Traditional Chinese Medicine (ISBN: 9787030235534)	167	U.S. Patent Application No. 15/573,583.	1e-06	0.4143	0.0510169	N/A	4.85	10	6	7	In domain	+	0.9923	-	0.8068	-	0.2924	-	0.5857	Mitochondria	0.8145	-	0.5735	+	0.8832	+	0.9529	-	0.9000	-	1.0000	+	0.8307	+	0.7567	-	0.6150	+	0.6284	-	1.0000	-	0.7775	-
zhishi_010	Nomilinic acid	CC(=O)O[C@H](CC(=O)O)[C@@]1(C)[C@@H](CC(=O)[C@]2(C)[C@@H]1CC[C@@]3(C)[C@@H](OC(=O)[C@H]4O[C@@]234)c5cocc5)C(C)(C)O	Zhishi	532.579	Book: Chemical Components of Source Plants in Traditional Chinese Medicine (ISBN: 9787030235534)	167	U.S. Patent Application No. 15/573,583.	1e-06	0.3857	0.0508806	N/A	3.21	9	2	6	In domain	+	0.9258	-	0.7460	+	0.9385	-	0.6143	Mitochondria	0.7564	-	0.8614	-	0.3368	-	0.2622	-	0.9600	-	0.7787	+	0.8345	+	0.6682	+	0.5748	+	0.6857	-	1.0000	-	0.8556	+
renshen_123	Panaxydol	CCCCCCC[C@@H]1O[C@@H]1CC#CC#C[C@H](O)C=C	Renshen	260.371	Book: Chemical Components of Source Plants in Traditional Chinese Medicine (ISBN: 9787030235534)	167	U.S. Patent Application No. 15/573,583.	1e-06	0.1857	0.0501079	N/A	3.06	2	1	8	In domain	+	0.9247	+	0.6175	+	0.9807	-	0.8143	Plasma membrane	0.6121	-	0.8554	+	0.8665	+	0.9276	-	0.9600	-	0.8000	-	0.8960	-	0.8868	-	0.7557	+	0.5179	-	0.7983	-	0.7568	-
renshen_151	Sucrose	OC[C@H]1O[C@H](O[C@]2(CO)O[C@H](CO)[C@@H](O)[C@@H]2O)[C@@H](O)[C@@H](O)[C@@H]1O	Renshen	342.296	Book: Chemical Components of Source Plants in Traditional Chinese Medicine (ISBN: 9787030235534)	167	U.S. Patent Application No. 15/573,583.	1e-06	0.2429	0.0498554	N/A	-5.40	11	8	5	Warning	-	0.9782	-	0.9401	+	0.9391	-	0.7571	Mitochondria	0.7807	-	0.8584	+	0.9283	+	0.9577	-	0.9800	-	0.9000	-	0.9660	-	0.9248	-	0.9754	-	0.5395	-	1.0000	-	0.8378	-
MOL001798	neohesperidin_qt	COc1cc(O)cc(c1)[C@@H]2CC(=O)c3c(O)cc(O)cc3O2	Zhishi	302.279	Database: TCMSP (http://tcmspnw.com)	167	U.S. Patent Application No. 15/573,583.	1e-06	0.2143	0.0498083	N/A	2.52	6	3	2	In domain	+	0.9936	+	0.6456	-	0.4059	-	0.7857	Mitochondria	0.7898	-	0.7216	+	0.9434	+	0.9873	-	0.9200	-	0.9250	-	0.7626	-	0.8690	-	0.9367	+	0.5267	-	1.0000	-	0.7429	+
renshen_073	Ginsenoyne D	CCCCCCC[C@@H]1O[C@@H]1CC#CC#C[C@H](O)CC	Renshen	262.387	Book: Chemical Components of Source Plants in Traditional Chinese Medicine (ISBN: 9787030235534)	167	U.S. Patent Application No. 15/573,583.	1e-06	0.1857	0.0497229	N/A	3.28	2	1	8	In domain	+	0.9053	+	0.7179	+	0.9832	-	0.8143	Mitochondria	0.4148	-	0.8531	+	0.8682	+	0.9364	-	0.9600	-	0.7750	-	0.8449	-	0.9023	-	0.7092	-	0.5000	-	1.0000	-	0.7408	-
kushen_039	Kushenol J	COc1ccc(cc1)[C@H]2Oc3cc(O[C@@H]4O[C@H](CO[C@@H]5OC[C@@H](O)[C@H](O)[C@H]5O)[C@@H](O)[C@H](O)[C@H]4O)ccc3C(=O)[C@@H]2O	Kushen	580.535	Book: Chemical Components of Source Plants in Traditional Chinese Medicine (ISBN: 9787030235534)	250	U.S. Patent Application No. 15/573,583.	1e-06	0.2714	0.0491691	N/A	-1.99	14	7	7	In domain	+	0.7181	-	0.8949	-	0.7776	-	0.7286	Mitochondria	0.6520	-	0.8496	+	0.8688	+	0.9536	-	0.8800	-	0.8500	+	0.6936	-	0.6433	-	0.6860	+	0.6611	-	1.0000	-	0.8201	-
renshen_156	Vitamin B1	Cc1ncc(C[n+]2csc(CCO)c2C)c(N)n1	Renshen	265.355	Book: Chemical Components of Source Plants in Traditional Chinese Medicine (ISBN: 9787030235534)	167	U.S. Patent Application No. 15/573,583.	1e-06	0.1857	0.0491669	N/A	0.61	5	2	4	In domain	+	0.8527	+	0.9313	+	0.9809	-	0.8143	Lysosomes	0.6134	-	1.0000	+	0.9044	+	0.9390	-	0.9200	-	0.7750	-	0.8503	-	0.9243	-	0.7050	-	0.5233	-	0.7872	-	0.8798	-
MOL005849	didymin	COc1ccc(cc1)[C@H]2CC(=O)c3c(O)cc(O)cc3O2	Zhishi	286.279	Database: TCMSP (http://tcmspnw.com)	167	U.S. Patent Application No. 15/573,583.	1e-06	0.2	0.0490826	N/A	2.81	5	2	2	In domain	+	0.9936	+	0.7139	-	0.4059	-	0.8000	Mitochondria	0.7898	-	0.7404	+	0.9519	+	0.9873	-	0.9200	-	0.9250	-	0.7369	-	0.8275	-	0.9499	+	0.5505	-	1.0000	-	0.7429	+
MOL002914	Eriodyctiol (flavanone)	Oc1cc(O)c2C(=O)C[C@@H](Oc2c1)c3ccc(O)c(O)c3	Zhishi	288.252	Database: TCMSP (http://tcmspnw.com)	167	U.S. Patent Application No. 15/573,583.	1e-06	0.2	0.0487466	N/A	2.22	6	4	1	In domain	+	0.9901	-	0.5841	-	0.4542	-	0.8000	Mitochondria	0.5959	-	0.6114	+	0.9750	+	0.9799	-	0.8600	-	0.9250	-	0.8991	-	0.9347	-	0.9605	-	0.5348	-	1.0000	-	0.7613	+
gancao_054	Licoleafol	C\C(=C/Cc1c(O)cc(O)c2C(=O)C[C@H](Oc12)c3ccc(O)c(O)c3)\CO	Gancao	372.369	Book: Chemical Components of Source Plants in Traditional Chinese Medicine (ISBN: 9787030235534)	167	U.S. Patent Application No. 15/573,583.	1e-06	0.2571	0.0485083	N/A	2.70	7	5	4	In domain	+	0.9845	-	0.5393	-	0.5176	-	0.7429	Mitochondria	0.6418	+	0.5580	+	0.9118	+	0.9724	-	0.8600	-	0.8250	-	0.5670	-	0.7145	-	0.8041	+	0.5459	-	1.0000	-	0.8135	-
MOL004989	6-prenylated eriodictyol	CC(=CCc1c(O)cc2O[C@H](CC(=O)c2c1O)c3ccc(O)c(O)c3)C	Gancao	356.369	Database: TCMSP (http://tcmspnw.com)	167	U.S. Patent Application No. 15/573,583.	1e-06	0.2429	0.0478867	N/A	3.72	6	4	3	In domain	+	0.9908	-	0.6506	-	0.3614	-	0.7571	Mitochondria	0.6544	+	0.5537	+	0.9271	+	0.9806	-	0.8800	-	0.8750	-	0.4927	-	0.7112	-	0.8538	+	0.5319	-	0.7979	-	0.8017	-
maidong_005	Borneol-2-O-beta-D-glucopyranoside	CC1(C)[C@H]2CC[C@]1(C)[C@@H](C2)O[C@H]3O[C@H](CO)[C@@H](O)[C@H](O)[C@H]3O	Maidong	316.39	Book: Chemical Components of Source Plants in Traditional Chinese Medicine (ISBN: 9787030235534)	250	U.S. Patent Application No. 15/573,583.	1e-06	0.1429	0.0475029	N/A	0.02	6	4	3	In domain	-	0.8509	-	0.7435	+	0.8551	-	0.8571	Mitochondria	0.7507	-	0.8562	+	0.8828	+	0.8896	-	0.9812	-	0.6750	-	0.9712	-	0.8973	-	0.9568	+	0.6219	-	1.0000	-	0.8396	-
MOL000288	pachyman	C[C@@H]1O[C@H](CO)[C@@H](O)[C@H](O[C@@H]2O[C@H](CO)[C@@H](O)[C@H](O[C@@H]3O[C@H](CO)[C@@H](O)[C@@H](C)[C@H]3O)[C@H]2O)[C@H]1O	Fuling	500.491	Database: TCMSP (http://tcmspnw.com)	250	U.S. Patent Application No. 15/573,583.	1e-06	0.2143	0.0450336	N/A	-5.23	14	9	7	Warning	-	0.7488	-	0.8717	+	0.8684	-	0.7857	Mitochondria	0.7353	-	0.8593	+	0.9059	+	0.9176	-	1.0000	-	0.9250	-	0.9768	-	0.8124	-	0.9269	-	0.5204	-	1.0000	-	0.8476	-
renshen_019	Chloropanaxydiol	CCCCCCC[C@H]1O[C@@H]1CC#CC#C[C@@H](O)[C@@H](O)CCl	Renshen	312.832	Book: Chemical Components of Source Plants in Traditional Chinese Medicine (ISBN: 9787030235534)	167	U.S. Patent Application No. 15/573,583.	1e-06	0.2	0.0449166	N/A	2.47	3	2	9	In domain	+	0.8347	-	0.6872	+	0.9634	-	0.8000	Mitochondria	0.6944	-	0.8546	+	0.8747	+	0.9413	-	0.9600	-	0.8041	-	0.8067	-	0.8544	-	0.7258	+	0.5592	-	0.8078	-	0.7763	-
MOL004806	euchrenone	C\C=C/c1cc(ccc1OC(C)C)[C@H]2CC(=O)c3ccc(O)c(CC=C(C)C)c3O2	Gancao	406.514	Database: TCMSP (http://tcmspnw.com)	167	U.S. Patent Application No. 15/573,583.	1e-06	0.2571	0.0444338	N/A	6.43	4	1	6	In domain	+	0.9879	+	0.5477	-	0.3724	-	0.7429	Mitochondria	0.8318	-	1.0000	+	0.8516	+	0.9034	-	0.9800	-	0.9250	+	0.9538	+	0.8911	+	0.5337	+	0.6355	-	0.8024	-	0.7542	-
qinghao_119	Rutin	C[C@@H]1O[C@@H](OC[C@H]2O[C@@H](OC3=C(Oc4cc(O)cc(O)c4C3=O)c5ccc(O)c(O)c5)[C@H](O)[C@@H](O)[C@@H]2O)[C@H](O)[C@H](O)[C@H]1O	Qinghao	610.517	Book: Chemical Components of Source Plants in Traditional Chinese Medicine (ISBN: 9787030235534)	250	U.S. Patent Application No. 15/573,583.	1e-06	0.2571	0.0442909	N/A	-1.69	16	10	6	Warning	+	0.7322	-	0.9269	-	0.9393	-	0.7429	Mitochondria	0.7477	-	0.5616	+	0.9131	+	0.9216	-	0.7800	-	0.7500	+	0.6681	-	0.6165	-	0.5071	+	0.6398	-	0.7038	-	0.8611	-
renshen_002	Adenosine triphosphate	Nc1ncnc2c1ncn2[C@@H]3O[C@H](COP(=O)(O)OP(=O)(O)OP(=O)(O)O)[C@@H](O)[C@H]3O	Renshen	507.181	Book: Chemical Components of Source Plants in Traditional Chinese Medicine (ISBN: 9787030235534)	167	U.S. Patent Application No. 15/573,583.	1e-06	0.3143	0.043538	N/A	-1.63	14	7	8	In domain	+	0.9301	-	0.8870	+	0.9755	-	0.6857	Mitochondria	0.3563	-	1.0000	+	0.9486	+	0.9472	-	0.9600	-	0.9750	-	0.5968	-	0.5451	-	0.7769	+	0.5348	-	0.8110	-	0.8643	-
renshen_082	1-Heptadecanol	CCCCCCCCCCCCCCCCCO	Renshen	256.467	Book: Chemical Components of Source Plants in Traditional Chinese Medicine (ISBN: 9787030235534)	167	U.S. Patent Application No. 15/573,583.	1e-06	0.1571	0.043036	N/A	5.85	1	1	15	In domain	+	0.9564	+	0.8393	+	1.0000	-	0.8429	Lysosomes	0.7017	-	0.8525	+	0.9187	+	0.8824	-	0.9800	-	0.7250	-	0.7729	-	0.9399	-	0.9503	-	0.7564	-	1.0000	-	0.7296	-
lianzixin_005	1-Methyl-corypalline	COc1cc2CCN(C)[C@H](C)c2cc1O	Lianzixin	207.269	Book: Chemical Components of Source Plants in Traditional Chinese Medicine (ISBN: 9787030235534)	42	U.S. Patent Application No. 15/573,583.	1e-06	0.5	0.0426242	N/A	1.95	3	1	1	In domain	+	0.9948	+	0.9131	+	0.9956	-	0.5000	Mitochondria	0.5470	-	0.8551	+	0.9562	+	0.9515	-	0.8200	+	0.6250	-	0.9154	-	0.9835	-	0.5347	+	0.5273	-	0.6000	+	0.8078	-
MOL000778	6-O-E-Feruloylajugol	COc1cc(\C=C\C(=O)O[C@H]2C[C@](C)(O)[C@H]3[C@H](O[C@@H]4O[C@H](CO)[C@@H](O)[C@H](O)[C@H]4O)OC=C[C@@H]23)ccc1O	Huanglian	524.514	Database: TCMSP (http://tcmspnw.com)	334	U.S. Patent Application No. 15/573,583.	1e-06	0.1571	0.0420858	N/A	-0.60	12	6	7	In domain	+	0.7902	-	0.8951	-	0.7274	-	0.8429	Mitochondria	0.5174	-	0.8601	+	0.8549	+	0.9544	-	0.9400	-	0.9000	-	0.5000	-	0.6161	-	0.5923	+	0.6854	-	1.0000	-	0.8689	-
gancao_045	Isoquercitrin	OC[C@H]1O[C@@H](OC2=C(Oc3cc(O)cc(O)c3C2=O)c4ccc(O)c(O)c4)[C@H](O)[C@@H](O)[C@@H]1O	Gancao	464.376	Book: Chemical Components of Source Plants in Traditional Chinese Medicine (ISBN: 9787030235534)	167	U.S. Patent Application No. 15/573,583.	1e-06	0.2714	0.0410608	N/A	-0.54	12	8	4	Warning	+	0.6468	-	0.9010	-	0.9152	-	0.7286	Mitochondria	0.6068	+	0.5930	+	0.9271	+	0.9265	-	0.7800	-	0.7750	-	0.6488	-	0.6240	-	0.8086	+	0.6155	-	0.6709	-	0.8582	-
renshen_098	Maltose	OC[C@H]1O[C@H](O[C@H]2[C@H](O)[C@@H](O)[C@H](O)O[C@@H]2CO)[C@H](O)[C@@H](O)[C@@H]1O	Renshen	342.296	Book: Chemical Components of Source Plants in Traditional Chinese Medicine (ISBN: 9787030235534)	167	U.S. Patent Application No. 15/573,583.	1e-06	0.2	0.0410502	N/A	-5.40	11	8	4	Warning	-	0.9784	-	0.9398	+	0.8255	-	0.8000	Mitochondria	0.7116	-	0.8584	+	0.9205	+	0.9559	-	1.0000	-	0.9750	-	0.9630	-	0.9209	-	0.9852	-	0.5604	-	1.0000	-	0.8414	-
MOL005100	5,7-dihydroxy-2-(3-hydroxy-4-methoxyphenyl)chroman-4-one	COc1ccc(cc1O)[C@H]2CC(=O)c3c(O)cc(O)cc3O2	Zhishi	302.279	Database: TCMSP (http://tcmspnw.com)	167	U.S. Patent Application No. 15/573,583.	1e-06	0.1714	0.0398374	N/A	2.52	6	3	2	In domain	+	0.9936	+	0.8207	-	0.5000	-	0.8286	Mitochondria	0.6551	-	0.5904	+	0.9581	+	0.9701	-	0.9200	-	0.9000	-	0.8294	-	0.9167	-	0.9026	+	0.5487	-	1.0000	-	0.7429	+
renshen_124	Panaxytriol	CCCCCCC[C@H](O)[C@H](O)CC#CC#C[C@H](O)C=C	Renshen	278.387	Book: Chemical Components of Source Plants in Traditional Chinese Medicine (ISBN: 9787030235534)	167	U.S. Patent Application No. 15/573,583.	1e-06	0.1571	0.0396474	N/A	2.01	3	3	9	In domain	+	0.8911	-	0.5907	+	0.8926	-	0.8429	Mitochondria	0.5594	-	0.8527	+	0.9045	+	0.9236	-	0.9600	-	0.8750	-	0.8822	-	0.8985	-	0.7748	-	0.5171	-	0.7980	-	0.7498	-
maidong_033	Ophiopogonoside A	CC(C)[C@@H]1CC[C@@]2(C)[C@H](O)CC[C@](C)(O)[C@H]2[C@@H]1O[C@@H]3O[C@H](CO)[C@@H](O)[C@H](O)[C@H]3O	Maidong	418.522	Book: Chemical Components of Source Plants in Traditional Chinese Medicine (ISBN: 9787030235534)	250	U.S. Patent Application No. 15/573,583.	1e-06	0.1571	0.0394793	N/A	-0.23	8	6	4	In domain	-	0.7437	-	0.7884	+	0.8151	-	0.8429	Mitochondria	0.7110	-	0.8604	+	0.9226	+	0.8460	-	0.9800	-	0.6542	-	0.8729	-	0.8032	-	0.8752	+	0.6459	-	0.7983	-	0.8352	-
qinghao_095	Nonacosanol	CCCCCCCCCCCCCCCCCCCCCCCCCCCCCO	Qinghao	424.786	Book: Chemical Components of Source Plants in Traditional Chinese Medicine (ISBN: 9787030235534)	250	U.S. Patent Application No. 15/573,583.	1e-06	0.1571	0.0388971	N/A	10.53	1	1	27	Warning	+	0.9564	+	0.5169	+	1.0000	-	0.8429	Lysosomes	0.7017	-	0.8524	+	0.9187	+	0.8824	-	0.9800	-	0.7250	-	0.8116	-	0.8536	-	0.9503	-	0.7564	-	1.0000	-	0.7296	-
banxia_008	1-O-beta-D-Glucopyranosyl-(2S, 3R, 4E, 11E)-2-(2 ’R-hydroxy hexadecenoylamino) -4,11-octadecadiene-l ,3-diol	CCCCCCCCCCCCCC[C@@H](O)C(=O)N[C@@H](CO[C@@H]1O[C@H](CO)[C@@H](O)[C@H](O)[C@H]1O)[C@H](O)\C=C\CCCCC\C=C\CCCCCC	Banxia	714.025	Book: Chemical Components of Source Plants in Traditional Chinese Medicine (ISBN: 9787030235534)	250	U.S. Patent Application No. 15/573,583.	1e-06	0.2571	0.0378704	N/A	6.13	9	7	32	In domain	-	0.9041	-	0.8657	+	0.7839	-	0.7429	Mitochondria	0.7599	-	0.5688	+	0.8182	+	0.9225	-	0.9612	-	0.9000	+	0.9056	+	0.6487	-	0.6787	+	0.6468	-	1.0000	-	0.8690	-
maidong_027	Ophiopogonin B	C[C@@H]1CC[C@]2(OC1)O[C@H]3C[C@@H]4[C@@H]5CC=C6C[C@@H](O)C[C@@H](O[C@@H]7O[C@H](C)[C@@H](O)[C@H](O)[C@H]7O[C@H]8O[C@@H](C)[C@H](O)[C@@H](O)[C@H]8O)[C@]6(C)[C@H]5CC[C@]4(C)[C@H]3[C@@H]2C	Maidong	722.902	Book: Chemical Components of Source Plants in Traditional Chinese Medicine (ISBN: 9787030235534)	250	U.S. Patent Application No. 15/573,583.	1e-06	0.2571	0.0374053	N/A	2.39	12	6	4	Warning	-	0.4885	-	0.8721	-	0.7614	-	0.7429	Mitochondria	0.7118	-	1.0000	+	0.8906	+	0.9561	-	0.9800	-	0.6750	+	0.5740	+	0.7026	+	0.5252	+	0.7490	-	0.8060	-	0.8129	-
maidong_026	Ophiopogonin A	C[C@@H]1CC[C@]2(OC1)O[C@H]3C[C@H]4[C@@H]5CC=C6C[C@@H](O)C[C@@H](O[C@H]7O[C@H](C)[C@H](O)[C@H](O)[C@@H]7O[C@@H]8O[C@@H](C)[C@H](O)[C@@H](OC(=O)C)[C@H]8O)[C@]6(C)[C@H]5CC[C@]4(C)[C@H]3[C@@H]2C	Maidong	764.939	Book: Chemical Components of Source Plants in Traditional Chinese Medicine (ISBN: 9787030235534)	250	U.S. Patent Application No. 15/573,583.	1e-06	0.2714	0.0373159	N/A	2.96	13	5	5	Warning	-	0.3765	-	0.8798	-	0.9252	-	0.7286	Mitochondria	0.8031	-	1.0000	+	0.8720	+	0.9537	-	1.0000	-	0.7250	+	0.6493	+	0.7383	+	0.5851	+	0.7599	-	1.0000	-	0.8767	-
zhishi_002	19-Hydroxydeacetylnomilinic acid-17-beta-D-glucopyranoside	CC(C)(O)[C@@H]1CC(=O)[C@]2(C)[C@H](CC[C@@](C)([C@@H](O[C@@H]3O[C@H](CO)[C@@H](O)[C@H](O)[C@H]3O)c4cocc4)[C@@]25O[C@@H]5C(=O)O)[C@@]1(CO)[C@@H](O)CC(=O)O	Zhishi	686.698	Book: Chemical Components of Source Plants in Traditional Chinese Medicine (ISBN: 9787030235534)	167	U.S. Patent Application No. 15/573,583.	1e-06	0.3571	0.0365352	N/A	-1.04	14	9	11	Warning	+	0.6669	-	0.8703	+	0.8647	-	0.6429	Mitochondria	0.7634	-	1.0000	+	0.7997	+	0.9187	-	0.9800	-	0.5000	-	0.4793	+	0.6745	+	0.6321	+	0.7160	-	1.0000	-	0.8680	-
renshen_155	Trifolin	OC[C@H]1O[C@H](OC2=C(Oc3cc(O)cc(O)c3C2=O)c4ccc(O)cc4)[C@H](O)[C@@H](O)[C@H]1O	Renshen	448.377	Book: Chemical Components of Source Plants in Traditional Chinese Medicine (ISBN: 9787030235534)	167	U.S. Patent Application No. 15/573,583.	1e-06	0.2286	0.0358196	N/A	-0.24	11	7	4	In domain	+	0.6347	-	0.9102	-	0.9152	-	0.7714	Mitochondria	0.6068	+	0.5869	+	0.8875	+	0.9265	-	0.8400	-	0.7750	-	0.5444	-	0.6120	-	0.7828	+	0.6012	-	0.6762	-	0.8575	-
gancao_100	Uralsaponin B	CC1(C)[C@H](CC[C@]2(C)[C@@H]1CC[C@]3(C)[C@@H]2C(=O)C=C4[C@@H]5C[C@@](C)(CC[C@@]5(C)CC[C@@]34C)C(=O)O)O[C@@H]6O[C@@H]([C@@H](O)[C@@H](O[C@@H]7O[C@H]([C@@H](O)[C@H](O)[C@H]7O)C(=O)O)[C@H]6O)C(=O)O	Gancao	822.932	Book: Chemical Components of Source Plants in Traditional Chinese Medicine (ISBN: 9787030235534)	167	U.S. Patent Application No. 15/573,583.	1e-06	0.4143	0.0353703	N/A	2.25	13	8	7	Warning	+	0.8215	-	0.8751	-	0.8852	-	0.5857	Mitochondria	0.8383	-	1.0000	-	0.4804	-	0.3963	-	1.0000	+	0.6929	+	0.7234	+	0.7632	-	0.7786	+	0.7172	-	0.7908	-	0.8981	-
MOL009166	anonaine	C1Cc2cc3OCOc3c4c5ccccc5C[C@@H](N1)c24	Lianzixin	265.306	Database: TCMSP (http://tcmspnw.com)	42	U.S. Patent Application No. 15/573,583.	1e-06	0.5286	0.0352046	N/A	2.83	3	1	0	In domain	+	0.9500	+	0.9339	+	0.9943	+	0.5286	Mitochondria	0.4377	-	1.0000	+	0.9350	+	0.9474	-	0.9000	-	0.5750	+	0.6501	-	0.7988	-	0.7654	+	0.5193	-	0.8132	+	0.5559	-
renshen_022	Daucosterol	CC[C@H](CC[C@@H](C)[C@H]1CC[C@H]2[C@@H]3CC=C4C[C@H](CC[C@]4(C)[C@H]3CC[C@]12C)O[C@@H]5O[C@H](CO)[C@@H](O)[C@H](O)[C@H]5O)C(C)C	Renshen	576.847	Book: Chemical Components of Source Plants in Traditional Chinese Medicine (ISBN: 9787030235534)	167	U.S. Patent Application No. 15/573,583.	1e-06	0.2857	0.0347966	N/A	5.85	6	4	9	In domain	-	0.6476	-	0.8381	+	0.8924	-	0.7143	Mitochondria	0.7468	-	0.5776	+	0.9074	+	0.8152	-	0.9612	-	0.6500	-	0.6871	+	0.6477	+	0.5534	+	0.7292	-	0.8025	-	0.8264	-
gancao_060	Licoricesaponin E2	CC1(C)[C@@H](CC[C@@]2(C)[C@H]1CC[C@@]3(C)[C@H]2C(=O)C=C4[C@H]5C[C@@]6(C)C[C@H](OC6=O)[C@]5(C)CC[C@]34C)O[C@@H]7O[C@@H]([C@@H](O)[C@@H](O)[C@H]7O[C@@H]8O[C@@H]([C@@H](O)[C@H](O)[C@H]8O)C(=O)O)C(=O)O	Gancao	820.916	Book: Chemical Components of Source Plants in Traditional Chinese Medicine (ISBN: 9787030235534)	167	U.S. Patent Application No. 15/573,583.	1e-06	0.4	0.0342333	N/A	1.70	14	7	6	Warning	+	0.7908	-	0.8805	-	0.5660	-	0.6000	Mitochondria	0.8037	-	1.0000	-	0.3193	+	0.8927	-	1.0000	-	0.5250	+	0.5741	+	0.7635	-	0.6824	+	0.7304	-	0.7984	-	0.8976	-
gancao_083	Neoisoliquiritin	OC[C@H]1O[C@@H](Oc2ccc(\C=C\C(=O)c3ccc(O)cc3O)cc2)[C@H](O)[C@@H](O)[C@@H]1O	Gancao	418.394	Book: Chemical Components of Source Plants in Traditional Chinese Medicine (ISBN: 9787030235534)	167	U.S. Patent Application No. 15/573,583.	1e-06	0.2	0.033584	N/A	0.17	9	6	6	In domain	+	0.6646	-	0.9019	-	0.6953	-	0.8000	Mitochondria	0.6013	-	0.5645	+	0.9307	+	0.9479	-	0.8800	-	0.7750	-	0.6496	-	0.6883	-	0.9045	+	0.5405	-	1.0000	-	0.8653	-
maidong_004	Borneol-2-O-alpha-L-arabinofuranosyl(l->6)-beta-D-glucopyranoside	CC1(C)[C@H]2CC[C@]1(C)[C@@H](C2)O[C@H]3O[C@H](CO[C@@H]4O[C@@H](CO)[C@H](O)[C@H]4O)[C@@H](O)[C@H](O)[C@H]3O	Maidong	448.505	Book: Chemical Components of Source Plants in Traditional Chinese Medicine (ISBN: 9787030235534)	250	U.S. Patent Application No. 15/573,583.	1e-06	0.1429	0.0335101	N/A	-1.52	10	6	6	In domain	-	0.8509	-	0.8264	+	0.8446	-	0.8571	Mitochondria	0.7486	-	0.8647	+	0.8818	+	0.9194	-	0.9812	+	0.5250	-	0.9621	-	0.7784	-	0.9175	+	0.6447	-	1.0000	-	0.8396	-
maidong_029	Ophiopogonin D	C[C@@H]1CC[C@]2(OC1)O[C@H]3C[C@H]4[C@@H]5CC=C6C[C@@H](O)C[C@@H](O[C@@H]7O[C@H](C)[C@@H](O)[C@H](O[C@@H]8OC[C@@H](O)[C@H](O)[C@H]8O)[C@H]7O[C@@H]9O[C@@H](C)[C@H](O)[C@@H](O)[C@H]9O)[C@]6(C)[C@H]5CC[C@]4(C)[C@H]3[C@@H]2C	Maidong	855.017	Book: Chemical Components of Source Plants in Traditional Chinese Medicine (ISBN: 9787030235534)	250	U.S. Patent Application No. 15/573,583.	1e-06	0.2714	0.0333846	N/A	0.85	16	8	6	Warning	-	0.4885	-	0.8830	-	0.7369	-	0.7286	Mitochondria	0.7441	-	1.0000	+	0.8765	+	0.9359	-	0.9800	-	0.6250	+	0.6908	+	0.7265	+	0.6246	+	0.7540	-	0.8060	-	0.8129	-
kushen_058	2-n-Nonadecyl-5,7-dihydroxy-6,8-dimethyl chromone	CCCCCCCCCCCCCCCCCCC(=O)N[C@@H](CO)[C@H](O)[C@H](O)CCCCCCCCCCCCCC	Kushen	597.996	Book: Chemical Components of Source Plants in Traditional Chinese Medicine (ISBN: 9787030235534)	250	U.S. Patent Application No. 15/573,583.	1e-06	0.1857	0.0326606	N/A	9.93	4	4	34	Warning	-	0.6795	-	0.8438	+	0.9478	-	0.8143	Mitochondria	0.7869	+	0.5734	+	0.9345	+	0.9123	-	1.0000	-	0.9041	+	0.7288	-	0.4827	-	0.6698	-	0.5247	-	0.6124	-	0.8374	-
gancao_082	Narcissin	COc1cc(ccc1O)C2=C(O[C@@H]3O[C@H](CO[C@@H]4O[C@@H](C)[C@H](O)[C@@H](O)[C@H]4O)[C@@H](O)[C@H](O)[C@H]3O)C(=O)c5c(O)cc(O)cc5O2	Gancao	624.544	Book: Chemical Components of Source Plants in Traditional Chinese Medicine (ISBN: 9787030235534)	167	U.S. Patent Application No. 15/573,583.	1e-06	0.2857	0.0321392	N/A	-1.38	16	9	7	Warning	+	0.7710	-	0.9373	-	0.9570	-	0.7143	Mitochondria	0.6902	-	0.5772	+	0.8990	+	0.9479	-	0.8600	-	0.8250	+	0.6263	-	0.5762	+	0.5892	+	0.6383	-	1.0000	-	0.8527	-
gancao_063	Licoricesaponin H2	CC1(C)[C@H](CC[C@@]2(C)[C@H]1CC[C@]3(C)[C@@H]2C(=O)C=C4[C@H]5C[C@@](C)(CC[C@]5(C)CC[C@@]34C)C(=O)O)O[C@@H]6O[C@@H]([C@@H](O)[C@H](O)[C@H]6O[C@H]7O[C@@H]([C@@H](O)[C@H](O)[C@H]7O)C(=O)O)C(=O)O	Gancao	822.932	Book: Chemical Components of Source Plants in Traditional Chinese Medicine (ISBN: 9787030235534)	167	U.S. Patent Application No. 15/573,583.	1e-06	0.3714	0.0317077	N/A	2.25	13	8	7	Warning	+	0.8215	-	0.8793	-	0.8852	-	0.6286	Mitochondria	0.8383	-	1.0000	-	0.4761	-	0.3963	-	1.0000	+	0.6929	+	0.6059	+	0.7608	-	0.7951	+	0.7215	-	0.7908	-	0.8981	-
gancao_099	Uralsaponin A	CC1(C)[C@H](CC[C@@]2(C)[C@H]1CC[C@]3(C)[C@@H]2C(=O)C=C4[C@@H]5C[C@](C)(CC[C@]5(C)CC[C@@]34C)C(=O)O)O[C@@H]6O[C@@H]([C@@H](O)[C@H](O)[C@H]6O[C@@H]7O[C@@H]([C@@H](O)[C@H](O)[C@H]7O)C(=O)O)C(=O)O	Gancao	822.932	Book: Chemical Components of Source Plants in Traditional Chinese Medicine (ISBN: 9787030235534)	167	U.S. Patent Application No. 15/573,583.	1e-06	0.3714	0.0317077	N/A	2.25	13	8	7	Warning	+	0.8215	-	0.8793	-	0.8852	-	0.6286	Mitochondria	0.8383	-	1.0000	-	0.4761	-	0.3963	-	1.0000	+	0.6929	+	0.6059	+	0.7608	-	0.7951	+	0.7215	-	0.7908	-	0.8981	-
renshen_065	Ginsenoside Rh3	CC(=CC\C=C(/C)\[C@H]1CC[C@]2(C)[C@@H]1[C@H](O)C[C@@H]3[C@@]4(C)CC[C@H](O[C@@H]5O[C@H](CO)[C@@H](O)[C@H](O)[C@H]5O)C(C)(C)[C@@H]4CC[C@@]23C)C	Renshen	604.857	Book: Chemical Components of Source Plants in Traditional Chinese Medicine (ISBN: 9787030235534)	167	U.S. Patent Application No. 15/573,583.	1e-06	0.2714	0.0315242	N/A	5.13	7	5	6	In domain	-	0.6476	-	0.8309	-	0.2776	-	0.7286	Mitochondria	0.7286	-	0.7174	+	0.8214	+	0.8549	-	0.9612	-	0.6542	+	0.5814	+	0.8238	-	0.8800	+	0.7116	-	0.8025	-	0.8264	-
renshen_038	Ginsenoside F1	CC(=CCC[C@](C)(O[C@H]1O[C@H](CO)[C@@H](O)[C@H](O)[C@H]1O)[C@H]2CC[C@]3(C)[C@@H]2[C@@H](O)C[C@@H]4[C@@]5(C)CC[C@H](O)C(C)(C)[C@@H]5[C@@H](O)C[C@@]34C)C	Renshen	638.872	Book: Chemical Components of Source Plants in Traditional Chinese Medicine (ISBN: 9787030235534)	167	U.S. Patent Application No. 15/573,583.	1e-06	0.2857	0.0314184	N/A	3.30	9	7	7	In domain	-	0.6476	-	0.8485	-	0.2776	-	0.7143	Mitochondria	0.7286	-	0.7219	+	0.8363	+	0.8549	-	0.9612	-	0.6542	-	0.7125	+	0.7514	-	0.7232	+	0.7068	-	0.8025	-	0.8264	-
renshen_063	20(R)-Ginsenoside Rh2	CC(=CCC[C@@](C)(O)[C@@]1(C)CC[C@]2(C)[C@@H]3CC[C@H]4C(C)(C)[C@H](CC[C@]4(C)[C@@H]3C[C@H](O)[C@@H]12)O[C@@H]5O[C@H](CO)[C@@H](O)[C@H](O)[C@H]5O)C	Renshen	622.873	Book: Chemical Components of Source Plants in Traditional Chinese Medicine (ISBN: 9787030235534)	167	U.S. Patent Application No. 15/573,583.	1e-06	0.2714	0.0306124	N/A	4.32	8	6	7	In domain	-	0.6253	-	0.8460	-	0.2776	-	0.7286	Mitochondria	0.7286	-	0.5803	+	0.7917	+	0.8549	-	0.9800	-	0.6542	-	0.5877	+	0.8684	-	0.7970	+	0.7199	-	0.7890	-	0.8406	-
renshen_064	20(S)-Ginsenoside Rh2	CC(=CCC[C@](C)(O)[C@H]1CC[C@]2(C)[C@@H]1[C@H](O)C[C@@H]3[C@@]4(C)CC[C@H](O[C@@H]5O[C@H](CO)[C@@H](O)[C@H](O)[C@H]5O)C(C)(C)[C@@H]4CC[C@@]23C)C	Renshen	622.873	Book: Chemical Components of Source Plants in Traditional Chinese Medicine (ISBN: 9787030235534)	167	U.S. Patent Application No. 15/573,583.	1e-06	0.2714	0.0306124	N/A	4.32	8	6	7	In domain	-	0.6253	-	0.8402	-	0.2776	-	0.7286	Mitochondria	0.7286	-	0.5801	+	0.7902	+	0.8549	-	0.9800	-	0.6542	-	0.5441	+	0.9382	-	0.9362	+	0.7121	-	0.7890	-	0.8406	-
gancao_087	Rutin	C[C@@H]1O[C@@H](OC[C@H]2O[C@@H](OC3=C(Oc4cc(O)cc(O)c4C3=O)c5ccc(O)c(O)c5)[C@H](O)[C@@H](O)[C@@H]2O)[C@H](O)[C@H](O)[C@H]1O	Gancao	610.517	Book: Chemical Components of Source Plants in Traditional Chinese Medicine (ISBN: 9787030235534)	167	U.S. Patent Application No. 15/573,583.	1e-06	0.2571	0.0295863	N/A	-1.69	16	10	6	Warning	+	0.7322	-	0.9269	-	0.9393	-	0.7429	Mitochondria	0.7477	-	0.5616	+	0.9131	+	0.9216	-	0.7800	-	0.7500	+	0.6681	-	0.6165	-	0.5071	+	0.6398	-	0.7038	-	0.8611	-
MOL009159	3,5,7-trihydroxy-2-(3-hydroxy-4-methoxy-phenyl)-6,8-dimethoxy-chromone	COc1ccc(cc1O)C2=C(O)C(=O)c3c(O)c(OC)c(O)c(OC)c3O2	Lianzixin	376.314	Database: TCMSP (http://tcmspnw.com)	42	U.S. Patent Application No. 15/573,583.	1e-06	0.6286	0.0295151	N/A	2.31	9	4	4	In domain	+	0.9889	+	0.7858	-	0.3998	+	0.6286	Mitochondria	0.6343	-	0.6891	+	0.9339	+	0.8767	+	0.5400	-	0.9750	-	0.6074	-	0.5000	-	0.7857	+	0.5321	-	0.6401	-	0.8296	+
gancao_023	3-O-[beta-D-Glucuronopyranosyl-(1->2)-O-beta-D-glucuronopyranosyl]-24-hydroxyglabrolide	COC(=O)[C@H]1O[C@H](O[C@@H]2[C@@H](O)[C@H](O)[C@H](O[C@H]2O[C@H]3CC[C@@]4(C)[C@@H](CC[C@]5(C)[C@@H]4C(=O)C=C6[C@H]7C[C@]8(C)C[C@@H](OC8=O)[C@]7(C)CC[C@@]56C)[C@@]3(C)CO)C(=O)O)[C@H](O)[C@@H](O)[C@@H]1O	Gancao	850.942	Book: Chemical Components of Source Plants in Traditional Chinese Medicine (ISBN: 9787030235534)	167	U.S. Patent Application No. 15/573,583.	1e-06	0.3571	0.0294834	N/A	0.76	16	7	7	Warning	+	0.7679	-	0.8817	-	0.6290	-	0.6429	Mitochondria	0.8147	-	1.0000	+	0.7597	+	0.9519	-	0.9800	-	0.5771	+	0.7072	+	0.7633	+	0.5282	+	0.7439	-	0.8032	-	0.8959	-
MOL009156	4'-methyl-N-methylcoclaurine	COc1ccc(C[C@@H]2N(C)CCc3cc(OC)ccc23)cc1	Lianzixin	297.391	Database: TCMSP (http://tcmspnw.com)	42	U.S. Patent Application No. 15/573,583.	1e-06	0.4857	0.0288576	N/A	3.48	3	0	4	In domain	+	0.9946	+	0.9036	+	1.0000	-	0.5143	Mitochondria	0.7515	-	0.8605	+	0.9501	+	0.9519	-	0.9600	+	0.7000	+	0.7965	+	0.6479	+	0.5525	+	0.6272	+	0.7753	+	0.8760	-
MOL009167	(1R)-6,7-dimethoxy-1-(4-methoxybenzyl)-2-methyl-3,4-dihydro-1H-isoquinoline	COc1ccc(C[C@H]2N(C)CCc3cc(OC)c(OC)cc23)cc1	Lianzixin	327.417	Database: TCMSP (http://tcmspnw.com)	42	U.S. Patent Application No. 15/573,583.	1e-06	0.5286	0.0285263	N/A	3.48	4	0	5	In domain	+	0.9946	+	0.9173	+	0.9919	+	0.5286	Mitochondria	0.6936	-	1.0000	+	0.9396	+	0.9519	-	0.9600	+	0.5500	+	0.8481	+	0.8783	+	0.5716	+	0.6513	+	0.7753	+	0.8760	-
renshen_112	Panacon	CC1(C)CCC[C@](C)(O1)[C@@H]2CC[C@@]3(C)[C@@H]2[C@H](O)C[C@@H]4[C@@]5(C)CC[C@H](O[C@@H]6O[C@H](CO)[C@@H](O)[C@@H](O)[C@H]6O)C(C)(C)[C@@H]5CC[C@@]34C	Renshen	622.873	Book: Chemical Components of Source Plants in Traditional Chinese Medicine (ISBN: 9787030235534)	167	U.S. Patent Application No. 15/573,583.	1e-06	0.2429	0.0273978	N/A	4.57	8	5	4	In domain	-	0.6426	-	0.8398	+	0.7761	-	0.7571	Mitochondria	0.7341	-	0.5811	+	0.8145	+	0.8941	-	0.9612	-	0.6750	-	0.8615	+	0.7373	-	0.8290	+	0.7296	-	1.0000	-	0.8278	-
gancao_058	Licoricesaponin C2	CC1(C)[C@H](CC[C@@]2(C)[C@H]1CC[C@]3(C)[C@@H]2C=CC4=C5C[C@](C)(CC[C@]5(C)CC[C@@]34C)C(=O)O)O[C@@H]6O[C@@H]([C@@H](O)[C@H](O)[C@H]6O[C@H]7O[C@@H]([C@@H](O)[C@H](O)[C@H]7O)C(=O)O)C(=O)O	Gancao	806.933	Book: Chemical Components of Source Plants in Traditional Chinese Medicine (ISBN: 9787030235534)	167	U.S. Patent Application No. 15/573,583.	1e-06	0.3143	0.0273649	N/A	2.99	12	8	7	Warning	+	0.6534	-	0.8795	-	0.8852	-	0.6857	Mitochondria	0.8383	-	1.0000	+	0.8010	-	0.3963	-	1.0000	+	0.6929	-	0.4673	+	0.7546	-	0.6862	+	0.7169	-	1.0000	-	0.8837	-
renshen_143	beta-Sitosterol-3-(6-palmitoleoyl)glucopyranoside	CCCCCC\C=C\CCCCCCCC(=O)OC[C@H]1O[C@@H](O[C@H]2CC[C@]3(C)[C@H]4CC[C@]5(C)[C@H](CC[C@H]5[C@@H]4CC=C3C2)[C@H](C)CC[C@@H](CC)C(C)C)[C@H](O)[C@@H](O)[C@@H]1O	Renshen	813.24	Book: Chemical Components of Source Plants in Traditional Chinese Medicine (ISBN: 9787030235534)	167	U.S. Patent Application No. 15/573,583.	1e-06	0.3143	0.0271527	N/A	11.66	7	3	23	Warning	+	0.6437	-	0.8639	+	0.8424	-	0.6857	Mitochondria	0.8291	-	0.5928	+	0.8397	+	0.8305	-	1.0000	-	0.7026	+	0.9280	+	0.7368	+	0.6883	+	0.7569	-	1.0000	-	0.8834	-
maidong_028	Ophiopogonin C'	C[C@H]1CC[C@]2(OC1)O[C@H]3C[C@H]4[C@@H]5CC=C6C[C@H](CC[C@]6(C)[C@H]5CC[C@]4(C)[C@H]3[C@@H]2C)O[C@@H]7O[C@H](CO)[C@@H](O)[C@H](O)[C@H]7O[C@H]8O[C@H](C)[C@@H](O)[C@H](O)[C@H]8O	Maidong	722.902	Book: Chemical Components of Source Plants in Traditional Chinese Medicine (ISBN: 9787030235534)	250	U.S. Patent Application No. 15/573,583.	1e-06	0.1857	0.0270174	N/A	2.39	12	6	5	Warning	-	0.5941	-	0.8813	-	0.3384	-	0.8143	Mitochondria	0.7739	-	1.0000	+	0.8976	+	0.8663	-	0.9800	-	0.5750	+	0.7121	+	0.6982	-	0.5395	+	0.7433	-	0.8054	-	0.8216	-
maidong_003	Borneol-2-O-beta-D-apiofuranosyl(1->6)-beta-D-glucopyranoside	CC1(C)[C@H]2CC[C@]1(C)[C@@H](C2)O[C@H]3O[C@H](CO[C@@H]4OC[C@](O)(CO)[C@H]4O)[C@@H](O)[C@H](O)[C@H]3O	Maidong	448.505	Book: Chemical Components of Source Plants in Traditional Chinese Medicine (ISBN: 9787030235534)	250	U.S. Patent Application No. 15/573,583.	1e-06	0.1143	0.0268034	N/A	-1.52	10	6	6	In domain	-	0.8336	-	0.7921	+	0.8454	-	0.8857	Mitochondria	0.6800	-	0.8627	+	0.8862	+	0.9234	-	1.0000	+	0.5750	-	0.9249	-	0.7327	-	0.7874	+	0.6757	-	1.0000	-	0.8503	-
gancao_064	Licoricesaponin J2	C[C@]12CC[C@@](C)(C[C@H]1C3=CC[C@@H]4[C@@]5(C)CC[C@H](O[C@@H]6O[C@@H]([C@@H](O)[C@H](O)[C@H]6O[C@H]7O[C@@H]([C@@H](O)[C@H](O)[C@H]7O)C(=O)O)C(=O)O)[C@](C)(CO)[C@@H]5CC[C@@]4(C)[C@]3(C)CC2)C(=O)O	Gancao	824.948	Book: Chemical Components of Source Plants in Traditional Chinese Medicine (ISBN: 9787030235534)	167	U.S. Patent Application No. 15/573,583.	1e-06	0.3143	0.0267673	N/A	2.04	13	9	8	Warning	-	0.6332	-	0.8871	-	0.6390	-	0.6857	Mitochondria	0.8725	-	1.0000	+	0.8406	-	0.3693	-	1.0000	+	0.5952	+	0.6519	+	0.7574	-	0.7288	+	0.7116	-	1.0000	-	0.8798	-
gancao_062	Licoricesaponin G2	C[C@]12CC[C@@](C)(C[C@@H]1C3=CC(=O)[C@@H]4[C@@]5(C)CC[C@H](O[C@@H]6O[C@@H]([C@@H](O)[C@H](O)[C@H]6O[C@H]7O[C@@H]([C@@H](O)[C@H](O)[C@H]7O)C(=O)O)C(=O)O)[C@](C)(CO)[C@@H]5CC[C@@]4(C)[C@]3(C)CC2)C(=O)O	Gancao	838.931	Book: Chemical Components of Source Plants in Traditional Chinese Medicine (ISBN: 9787030235534)	167	U.S. Patent Application No. 15/573,583.	1e-06	0.3143	0.0263212	N/A	1.22	14	9	8	Warning	+	0.7886	-	0.8813	-	0.6390	-	0.6857	Mitochondria	0.8725	-	1.0000	-	0.3407	-	0.3693	-	1.0000	+	0.5952	+	0.7456	+	0.7593	-	0.6953	+	0.7236	-	0.7960	-	0.8973	-
renshen_142	beta-Sitosterol-3-(6-linoleoyl)glucopyranoside	CCCCC\C=C\C\C=C/CCCCCCCC(=O)OC[C@H]1O[C@@H](O[C@H]2CC[C@]3(C)[C@H]4CC[C@]5(C)[C@H](CC[C@H]5[C@@H]4CC=C3C2)[C@H](C)CC[C@@H](CC)C(C)C)[C@H](O)[C@@H](O)[C@@H]1O	Renshen	839.278	Book: Chemical Components of Source Plants in Traditional Chinese Medicine (ISBN: 9787030235534)	167	U.S. Patent Application No. 15/573,583.	1e-06	0.3143	0.0263103	N/A	12.21	7	3	24	Warning	+	0.6437	-	0.8654	+	0.8424	-	0.6857	Mitochondria	0.8291	-	0.7291	+	0.8205	+	0.8305	-	1.0000	-	0.7026	+	0.9298	+	0.7369	+	0.7017	+	0.7600	-	1.0000	-	0.8834	-
renshen_111	Palmitin	CCCCCCCCCCCCCCCC(=O)OCC(COC(=O)CCCCCCCCCCCCCCC)OC(=O)CCCCCCCCCCCCCCC	Renshen	807.32	Book: Chemical Components of Source Plants in Traditional Chinese Medicine (ISBN: 9787030235534)	167	U.S. Patent Application No. 15/573,583.	1e-06	0.3	0.0261073	N/A	16.43	6	0	47	Warning	+	0.9543	-	0.7549	+	0.9891	-	0.7000	Mitochondria	0.8050	-	0.8556	+	0.8956	+	0.9542	-	0.8800	-	0.7750	+	0.9547	+	0.6618	-	0.8825	-	0.5864	-	0.7977	-	0.8679	-
renshen_046	Ginsenoside La	CC(=C[C@H]1C[C@](C)(O[C@@H]2O[C@H](CO)[C@@H](O)[C@@H](O)[C@H]2O)[C@H]3CC[C@]4(C)[C@@H]5CC[C@H]6C(C)(C)[C@H](CC[C@]6(C)[C@H]5C[C@@H](O1)[C@H]34)O[C@H]7O[C@H](CO)[C@@H](O)[C@H](O)[C@H]7O)C	Renshen	768.971	Book: Chemical Components of Source Plants in Traditional Chinese Medicine (ISBN: 9787030235534)	167	U.S. Patent Application No. 15/573,583.	1e-06	0.2857	0.0261028	N/A	1.78	13	8	7	Warning	-	0.5295	-	0.8794	+	0.8475	-	0.7143	Mitochondria	0.7351	-	1.0000	+	0.8540	+	0.8142	-	0.9612	-	0.6500	-	0.7000	+	0.7446	-	0.7333	+	0.7378	-	0.8037	-	0.8331	-
renshen_066	Ginsenoside Rh4	CC(=CC\C=C(/C)\[C@H]1CC[C@]2(C)[C@@H]1[C@H](O)C[C@@H]3[C@@]4(C)CC[C@H](O)C(C)(C)[C@@H]4[C@H](C[C@@]23C)O[C@@H]5O[C@H](CO)[C@@H](O)[C@H](O)[C@H]5O)C	Renshen	620.857	Book: Chemical Components of Source Plants in Traditional Chinese Medicine (ISBN: 9787030235534)	167	U.S. Patent Application No. 15/573,583.	1e-06	0.2286	0.0258685	N/A	4.10	8	6	6	In domain	-	0.6476	-	0.8271	-	0.2776	-	0.7714	Mitochondria	0.7286	-	0.7156	+	0.8594	+	0.8549	-	0.9612	-	0.6542	+	0.6097	+	0.6854	-	0.7362	+	0.7189	-	0.8025	-	0.8264	-
gancao_075	Methyl-n-butyl-uralsaponin A esters	CCCCOC(=O)[C@H]1O[C@@H](O[C@H]2CC[C@@]3(C)[C@@H](CC[C@]4(C)[C@@H]3C(=O)C=C5[C@@H]6C[C@](C)(CC[C@]6(C)CC[C@]45C)C(=O)O)C2(C)C)[C@H](O[C@H]7O[C@@H]([C@@H](O)[C@H](O)[C@H]7O)C(=O)OC)[C@@H](O)[C@@H]1O	Gancao	893.065	Book: Chemical Components of Source Plants in Traditional Chinese Medicine (ISBN: 9787030235534)	167	U.S. Patent Application No. 15/573,583.	1e-06	0.3286	0.0258507	N/A	3.59	15	6	10	Warning	+	0.8286	-	0.8732	-	0.4093	-	0.6714	Mitochondria	0.8753	-	1.0000	-	0.3913	-	0.2172	-	0.9400	-	0.5750	+	0.7966	+	0.7631	-	0.5088	+	0.7477	-	0.7915	-	0.8989	-
gancao_009	Ethyl-n-buthy-uralsaponin A esters	CCCCOC(=O)[C@H]1O[C@@H](O[C@H]2CC[C@@]3(C)[C@@H](CC[C@]4(C)[C@@H]3C(=O)C=C5[C@@H]6C[C@](C)(CC[C@]6(C)CC[C@]45C)C(=O)O)C2(C)C)[C@H](O[C@H]7O[C@@H]([C@@H](O)[C@H](O)[C@H]7O)C(=O)OCC)[C@@H](O)[C@@H]1O	Gancao	907.092	Book: Chemical Components of Source Plants in Traditional Chinese Medicine (ISBN: 9787030235534)	167	U.S. Patent Application No. 15/573,583.	1e-06	0.3286	0.0254509	N/A	3.98	15	6	11	Warning	+	0.8286	-	0.8726	+	0.8343	-	0.6714	Mitochondria	0.8823	-	1.0000	-	0.3993	-	0.3321	-	0.9400	-	0.5276	+	0.8202	+	0.7614	-	0.5744	+	0.7493	-	0.7915	-	0.8989	-
gancao_002	Vicenin 2	OC[C@H]1O[C@H]([C@H](O)[C@@H](O)[C@@H]1O)c2c(O)c([C@@H]3O[C@H](CO)[C@@H](O)[C@@H](O)[C@H]3O)c4OC(=CC(=O)c4c2O)c5ccc(O)cc5	Gancao	594.518	Book: Chemical Components of Source Plants in Traditional Chinese Medicine (ISBN: 9787030235534)	167	U.S. Patent Application No. 15/573,583.	1e-06	0.2143	0.0253247	N/A	-2.39	15	11	5	Warning	+	0.8984	-	0.9152	-	0.4569	-	0.7857	Mitochondria	0.5454	-	0.5548	+	0.7711	+	0.9752	-	0.8200	-	0.8250	+	0.6705	-	0.5691	-	0.8398	+	0.5621	-	0.6194	-	0.8416	-
renshen_062	20(S)-Ginsenoside Rh1	CC(=CCC[C@](C)(O)[C@@H]1CC[C@]2(C)[C@@H]1[C@H](O)C[C@@H]3[C@@]4(C)CC[C@H](O)C(C)(C)[C@@H]4[C@H](C[C@@]23C)O[C@@H]5O[C@H](CO)[C@@H](O)[C@H](O)[C@H]5O)C	Renshen	638.872	Book: Chemical Components of Source Plants in Traditional Chinese Medicine (ISBN: 9787030235534)	167	U.S. Patent Application No. 15/573,583.	1e-06	0.2286	0.0251391	N/A	3.30	9	7	7	In domain	-	0.6253	-	0.8385	-	0.2776	-	0.7714	Mitochondria	0.7286	-	0.7214	+	0.8352	+	0.8549	-	0.9800	-	0.6542	-	0.5657	+	0.7239	-	0.7787	+	0.7194	-	0.7890	-	0.8406	-
renshen_042	Ginsenoside Ib	CC(=C)[C@@H](O)CC[C@](C)(O[C@@H]1O[C@H](CO)[C@@H](O)[C@H](O)[C@H]1O)[C@H]2CC[C@]3(C)[C@@H]2[C@H](O)C[C@@H]4[C@@]5(C)CC[C@H](O[C@@H]6O[C@H](CO)[C@@H](O)[C@H](O)[C@H]6O)C(C)(C)[C@@H]5CC[C@@]34C	Renshen	801.013	Book: Chemical Components of Source Plants in Traditional Chinese Medicine (ISBN: 9787030235534)	167	U.S. Patent Application No. 15/573,583.	1e-06	0.2857	0.0250587	N/A	1.12	14	10	11	Warning	-	0.6476	-	0.8823	-	0.2765	-	0.7143	Mitochondria	0.6775	-	1.0000	+	0.8255	+	0.8181	-	0.9612	-	0.6500	-	0.7182	+	0.7609	-	0.6664	+	0.7257	-	0.8025	-	0.8264	-
renshen_144	beta-Sitosterol-3-(6-stearoyl)glucopyranoside	CCCCCCCCCCCCCCCCCC(=O)OC[C@H]1O[C@@H](O[C@H]2CC[C@]3(C)[C@H]4CC[C@]5(C)[C@H](CC[C@H]5[C@@H]4CC=C3C2)[C@H](C)CC[C@@H](CC)C(C)C)[C@H](O)[C@@H](O)[C@@H]1O	Renshen	843.309	Book: Chemical Components of Source Plants in Traditional Chinese Medicine (ISBN: 9787030235534)	167	U.S. Patent Application No. 15/573,583.	1e-06	0.3	0.0249932	N/A	12.66	7	3	26	Warning	-	0.4252	-	0.8619	+	0.8424	-	0.7000	Mitochondria	0.8291	-	0.5849	+	0.8703	+	0.8305	-	1.0000	-	0.7026	+	0.9027	+	0.7348	+	0.6756	+	0.7553	-	1.0000	-	0.8832	-
gancao_004	Inflasaponin IV	CCCCOC(=O)[C@H]1O[C@@H](O[C@@H]2[C@H](O)[C@H](O)[C@H](O[C@H]2O[C@H]3CC[C@]4(C)[C@H](CC[C@]5(C)[C@@H]4C(=O)C=C6[C@@H]7C[C@@](C)(CC[C@@]7(C)CC[C@@]56C)C(=O)O)C3(C)C)C(=O)OCCCC)[C@H](O)[C@H](O)[C@@H]1O	Gancao	935.145	Book: Chemical Components of Source Plants in Traditional Chinese Medicine (ISBN: 9787030235534)	167	U.S. Patent Application No. 15/573,583.	1e-06	0.3286	0.0246874	N/A	4.76	15	6	13	Warning	+	0.8286	-	0.8699	+	0.8343	-	0.6714	Mitochondria	0.8823	-	1.0000	-	0.4265	-	0.3321	-	0.9400	-	0.5276	+	0.8503	+	0.7565	-	0.5999	+	0.7402	-	0.7915	-	0.8989	-
MOL009160	Loureirin A	COc1ccc(CCC(=O)c2ccc(O)cc2)c(OC)c1	Lianzixin	286.322	Database: TCMSP (http://tcmspnw.com)	42	U.S. Patent Application No. 15/573,583.	1e-06	0.4	0.0246845	N/A	3.22	4	1	6	In domain	+	0.9952	+	0.9535	+	0.9017	-	0.6000	Mitochondria	0.9414	-	0.8582	+	0.8817	+	0.9613	-	0.9600	-	0.8750	-	0.6457	-	0.6356	-	0.7100	-	0.5156	-	1.0000	+	0.3530	-
gancao_065	Licoricesaponin K2	C[C@]1(CO)[C@H](CC[C@@]2(C)[C@H]1CC[C@]3(C)[C@@H]2C=CC4=C5C[C@](C)(CC[C@]5(C)CC[C@@]34C)C(=O)O)O[C@@H]6O[C@@H]([C@@H](O)[C@H](O)[C@H]6O[C@H]7O[C@@H]([C@@H](O)[C@H](O)[C@H]7O)C(=O)O)C(=O)O	Gancao	822.932	Book: Chemical Components of Source Plants in Traditional Chinese Medicine (ISBN: 9787030235534)	167	U.S. Patent Application No. 15/573,583.	1e-06	0.2857	0.0243912	N/A	1.96	13	9	8	Warning	-	0.3857	-	0.8814	-	0.6390	-	0.7143	Mitochondria	0.8725	-	1.0000	+	0.8332	-	0.3693	-	1.0000	+	0.5952	+	0.6699	+	0.7556	-	0.6012	+	0.7194	-	1.0000	-	0.8829	-
lianzixin_007	4'-Methyl-N-methylcoclaurine	COc1ccc(C[C@H]2N(C)CCc3cc(OC)c(O)cc23)cc1	Lianzixin	313.391	Book: Chemical Components of Source Plants in Traditional Chinese Medicine (ISBN: 9787030235534)	42	U.S. Patent Application No. 15/573,583.	1e-06	0.4286	0.024165	N/A	3.18	4	1	4	In domain	+	0.9928	+	0.7867	+	0.9902	-	0.5714	Mitochondria	0.7303	-	0.8568	+	0.9431	+	0.9487	-	0.8600	+	0.5500	+	0.7583	+	0.6062	+	0.5462	+	0.6515	+	0.7825	+	0.8432	-
renshen_132	Raffinose	OC[C@H]1O[C@@H](OC[C@H]2O[C@H](O[C@]3(CO)O[C@H](CO)[C@@H](O)[C@@H]3O)[C@H](O)[C@@H](O)[C@@H]2O)[C@H](O)[C@@H](O)[C@H]1O	Renshen	504.437	Book: Chemical Components of Source Plants in Traditional Chinese Medicine (ISBN: 9787030235534)	167	U.S. Patent Application No. 15/573,583.	1e-06	0.1714	0.0238721	N/A	-7.57	16	11	8	Warning	-	0.9782	-	0.9373	+	0.9135	-	0.8286	Mitochondria	0.7796	-	0.8624	+	0.9202	+	0.9556	-	0.9800	-	0.9250	-	0.8576	-	0.7786	-	0.9446	+	0.5137	-	1.0000	-	0.8378	-
gancao_057	Licoricesaponin B2	CC1(C)C[C@H](C[C@@]2(C)[C@H]1CC[C@]3(C)[C@@H]2CC=C4[C@@H]5C[C@](C)(CC[C@]5(C)CC[C@@]34C)C(=O)O)O[C@@H]6O[C@@H]([C@@H](O)[C@H](O)[C@H]6O[C@H]7O[C@@H]([C@@H](O)[C@H](O)[C@H]7O)C(=O)O)C(=O)O	Gancao	808.949	Book: Chemical Components of Source Plants in Traditional Chinese Medicine (ISBN: 9787030235534)	167	U.S. Patent Application No. 15/573,583.	1e-06	0.2714	0.0235709	N/A	3.07	12	8	7	Warning	-	0.5617	-	0.8839	-	0.8852	-	0.7286	Mitochondria	0.8383	-	1.0000	+	0.8465	-	0.3963	-	1.0000	+	0.6929	-	0.6634	+	0.7537	-	0.7481	+	0.6899	-	1.0000	-	0.8798	-
renshen_041	Ginsenoside Ia	CC(=CCC[C@](C)(O[C@@H]1O[C@H](CO)[C@@H](O)[C@H](O)[C@H]1O)[C@H]2CC[C@]3(C)[C@@H]2[C@@H](O)C[C@@H]4[C@@]5(C)CC[C@H](O[C@@H]6O[C@H](CO)[C@@H](O)[C@H](O)[C@H]6O)C(C)(C)[C@@H]5[C@@](C)(O)C[C@@]34C)C	Renshen	815.039	Book: Chemical Components of Source Plants in Traditional Chinese Medicine (ISBN: 9787030235534)	167	U.S. Patent Application No. 15/573,583.	1e-06	0.2714	0.0233948	N/A	1.51	14	10	10	Warning	-	0.6253	-	0.8800	-	0.2765	-	0.7286	Mitochondria	0.7251	-	1.0000	+	0.8124	+	0.8189	-	0.9800	-	0.6000	-	0.6819	+	0.7911	-	0.7403	+	0.7161	-	0.7890	-	0.8406	-
kushen_068	Sophoraflavoside II	C[C@H]1O[C@H](O)[C@H](O[C@@H]2O[C@H](CO)[C@@H](O)[C@H](O)[C@H]2O[C@H]3[C@H](O)[C@H](O)[C@H](O[C@@H]3O[C@@H]4CC[C@]5(C)[C@H](CC[C@]6(C)[C@@H]5CC=C7[C@@H]8C[C@](C)(C[C@@H](O)[C@@]8(C)CC[C@@]67C)C(=O)O)[C@@]4(C)CO)C(=O)O)[C@@H](O)[C@@H]1O	Kushen	973.105	Book: Chemical Components of Source Plants in Traditional Chinese Medicine (ISBN: 9787030235534)	250	U.S. Patent Application No. 15/573,583.	1e-06	0.2143	0.0231619	N/A	-0.23	18	12	10	Warning	-	0.6211	-	0.8924	-	0.4075	-	0.7857	Mitochondria	0.8439	-	1.0000	+	0.8194	-	0.3315	-	1.0000	-	0.5298	+	0.5941	+	0.7505	-	0.5450	+	0.7267	-	1.0000	-	0.8769	-
lianzixin_010	Pronuciferine	COc1cc2CCN(C)[C@@H]3CC4(C=CC(=O)C=C4)c(c1OC)c23	Lianzixin	311.375	Book: Chemical Components of Source Plants in Traditional Chinese Medicine (ISBN: 9787030235534)	42	U.S. Patent Application No. 15/573,583.	1e-06	0.4	0.0226985	N/A	2.57	4	0	2	In domain	+	0.9901	+	0.8551	+	0.9972	-	0.6000	Mitochondria	0.6425	-	0.8589	+	0.9508	+	0.9529	-	1.0000	+	0.6000	+	0.6459	-	0.7211	-	0.5989	+	0.6836	-	1.0000	+	0.4324	-
gancao_071	Liquiritigenin-7,4'-diglucoside	OC[C@H]1O[C@@H](Oc2ccc(cc2)[C@@H]3CC(=O)c4ccc(O[C@@H]5O[C@H](CO)[C@@H](O)[C@H](O)[C@H]5O)cc4O3)[C@H](O)[C@@H](O)[C@@H]1O	Gancao	580.535	Book: Chemical Components of Source Plants in Traditional Chinese Medicine (ISBN: 9787030235534)	167	U.S. Patent Application No. 15/573,583.	1e-06	0.1857	0.0224735	N/A	-2.25	14	8	7	Warning	+	0.6456	-	0.9017	-	0.7515	-	0.8143	Mitochondria	0.5848	-	0.7086	+	0.9300	+	0.9434	-	0.9400	-	0.8000	+	0.6990	-	0.4867	-	0.9124	+	0.5743	-	1.0000	-	0.8078	-
kushen_069	Sophoraflavoside III	C[C@H]1O[C@@H](O)[C@H](O[C@@H]2O[C@@H](CO)[C@H](O)[C@H](O)[C@H]2O[C@@H]3[C@H](O)[C@@H](O)[C@@H](O[C@H]3O[C@@H]4CC[C@]5(C)[C@H](CC[C@]6(C)[C@@H]5CC=C7[C@@H]8C[C@](C)(C[C@@H](O[C@@H]9C[C@@H](O)[C@H](O)[C@@H](O)O9)[C@@]8(C)CC[C@@]67C)C(=O)O)[C@@]4(C)CO)C(=O)O)[C@@H](O)[C@@H]1O	Kushen	1105.22	Book: Chemical Components of Source Plants in Traditional Chinese Medicine (ISBN: 9787030235534)	250	U.S. Patent Application No. 15/573,583.	1e-06	0.2286	0.021754	N/A	-1.42	22	14	12	Warning	-	0.6211	-	0.8820	-	0.4075	-	0.7714	Mitochondria	0.8439	-	1.0000	+	0.8128	-	0.3315	-	1.0000	-	0.5298	+	0.8426	+	0.7487	+	0.5927	+	0.7377	-	1.0000	-	0.8769	-
gancao_084	Neoliquiritin	OC[C@H]1O[C@@H](Oc2ccc3C(=O)C[C@H](Oc3c2)c4ccc(O)cc4)[C@H](O)[C@@H](O)[C@@H]1O	Gancao	418.394	Book: Chemical Components of Source Plants in Traditional Chinese Medicine (ISBN: 9787030235534)	167	U.S. Patent Application No. 15/573,583.	1e-06	0.1286	0.0215945	N/A	0.28	9	5	4	In domain	+	0.6733	-	0.9314	-	0.9152	-	0.8714	Mitochondria	0.6068	-	0.5739	+	0.8962	+	0.9265	-	0.9600	-	0.7750	+	0.6004	-	0.7250	-	0.8704	+	0.6073	-	1.0000	-	0.8143	-
MOL004940	neoliquiritin	OC[C@H]1O[C@@H](Oc2ccc3C(=O)C[C@@H](Oc3c2)c4ccc(O)cc4)[C@H](O)[C@@H](O)[C@@H]1O	Gancao	418.394	Database: TCMSP (http://tcmspnw.com)	167	U.S. Patent Application No. 15/573,583.	1e-06	0.1286	0.0215945	N/A	0.28	9	5	4	In domain	+	0.6733	-	0.9314	-	0.9152	-	0.8714	Mitochondria	0.6068	-	0.5739	+	0.8962	+	0.9265	-	0.9600	-	0.7750	+	0.6004	-	0.7250	-	0.8704	+	0.6073	-	1.0000	-	0.8143	-
renshen_146	Stigmasterol-3-(6-linoleoyl)glucopyranoside	CCCCC\C=C\C\C=C/CCCCCCCC(=O)OC[C@H]1O[C@@H](O[C@H]2CC[C@]3(C)[C@H]4CC[C@]5(C)[C@H](CC[C@H]5[C@@H]4CC=C3C2)[C@H](C)\C=C\[C@@H](CC)C(C)C)[C@H](O)[C@@H](O)[C@@H]1O	Renshen	837.262	Book: Chemical Components of Source Plants in Traditional Chinese Medicine (ISBN: 9787030235534)	167	U.S. Patent Application No. 15/573,583.	1e-06	0.2571	0.0215739	N/A	11.99	7	3	23	Warning	+	0.6437	-	0.8637	+	0.8424	-	0.7429	Mitochondria	0.8291	-	1.0000	+	0.8107	+	0.8305	-	1.0000	-	0.7026	+	0.9681	+	0.7437	+	0.6791	+	0.7568	-	1.0000	-	0.8834	-
renshen_147	Stigmasterol-3-(6-oleoyl)glucopyranoside	CCCCCCCC\C=C\CCCCCCCC(=O)OC[C@H]1O[C@@H](O[C@H]2CC[C@]3(C)[C@H]4CC[C@]5(C)[C@H](CC[C@H]5[C@@H]4CC=C3C2)[C@H](C)\C=C\[C@@H](CC)C(C)C)[C@H](O)[C@@H](O)[C@@H]1O	Renshen	839.278	Book: Chemical Components of Source Plants in Traditional Chinese Medicine (ISBN: 9787030235534)	167	U.S. Patent Application No. 15/573,583.	1e-06	0.2571	0.0215221	N/A	12.21	7	3	24	Warning	+	0.6437	-	0.8625	+	0.8424	-	0.7429	Mitochondria	0.8291	-	0.8661	+	0.8300	+	0.8305	-	1.0000	-	0.7026	+	0.9535	+	0.7444	+	0.6639	+	0.7537	-	1.0000	-	0.8834	-
renshen_149	Stigmast-3-O-beta-D-glucopyanosyl-6-hexadecanoate	CCCCCCCCCCCCCCCC(=O)OC[C@H]1O[C@@H](O[C@H]2CC[C@]3(C)[C@H]4CC[C@]5(C)[C@H](CC[C@H]5[C@@H]4CC=C3C2)[C@H](C)\C=C\[C@@H](CC)C(C)C)[C@H](O)[C@@H](O)[C@@H]1O	Renshen	813.24	Book: Chemical Components of Source Plants in Traditional Chinese Medicine (ISBN: 9787030235534)	167	U.S. Patent Application No. 15/573,583.	1e-06	0.2429	0.0209844	N/A	11.66	7	3	23	Warning	+	0.6437	-	0.8624	+	0.8424	-	0.7571	Mitochondria	0.8291	-	0.7295	+	0.8583	+	0.8305	-	1.0000	-	0.7026	+	0.9278	+	0.7442	+	0.6342	+	0.7497	-	1.0000	-	0.8834	-
renshen_060	20(S)-Ginsenoside Rg3	CC(=CCC[C@](C)(O)[C@H]1CC[C@]2(C)[C@@H]1[C@H](O)C[C@@H]3[C@@]4(C)CC[C@H](O[C@@H]5O[C@@H](CO)[C@@H](O)[C@@H](O)[C@@H]5O[C@@H]6O[C@H](CO)[C@@H](O)[C@H](O)[C@H]6O)C(C)(C)[C@@H]4CC[C@@]23C)C	Renshen	785.013	Book: Chemical Components of Source Plants in Traditional Chinese Medicine (ISBN: 9787030235534)	167	U.S. Patent Application No. 15/573,583.	1e-06	0.2286	0.0204591	N/A	2.15	13	9	10	Warning	-	0.6253	-	0.8840	-	0.2765	-	0.7714	Mitochondria	0.7251	-	1.0000	+	0.7934	+	0.8189	-	0.9800	-	0.6000	-	0.4911	+	0.8063	-	0.9036	+	0.7234	-	0.7890	-	0.8406	-
renshen_148	Stigmasterol-3-(6-stearoyl)glucopyranoside	CCCCCCCCCCCCCCCCCC(=O)OC[C@H]1O[C@@H](O[C@H]2CC[C@]3(C)[C@H]4CC[C@]5(C)[C@H](CC[C@H]5[C@@H]4CC=C3C2)[C@H](C)\C=C\[C@@H](CC)C(C)C)[C@H](O)[C@@H](O)[C@@H]1O	Renshen	841.293	Book: Chemical Components of Source Plants in Traditional Chinese Medicine (ISBN: 9787030235534)	167	U.S. Patent Application No. 15/573,583.	1e-06	0.2429	0.0202846	N/A	12.44	7	3	25	Warning	+	0.6437	-	0.8622	+	0.8424	-	0.7571	Mitochondria	0.8291	-	0.7284	+	0.8583	+	0.8305	-	1.0000	-	0.7026	+	0.9409	+	0.7422	+	0.6342	+	0.7497	-	1.0000	-	0.8834	-
renshen_045	Ginsenoside III	CC(=C)[C@@H](O)CC[C@](C)(O[C@@H]1O[C@H](CO)[C@@H](O)[C@H](O)[C@H]1O[C@H]2O[C@H](CO)[C@@H](O)[C@H](O)[C@H]2O)[C@H]3CC[C@]4(C)[C@@H]3[C@H](O)C[C@@H]5[C@@]6(C)CC[C@H](O[C@@H]7O[C@H](CO)[C@@H](O)[C@H](O)[C@H]7O)C(C)(C)[C@@H]6CC[C@@]45C	Renshen	963.153	Book: Chemical Components of Source Plants in Traditional Chinese Medicine (ISBN: 9787030235534)	167	U.S. Patent Application No. 15/573,583.	1e-06	0.2714	0.0197971	N/A	-1.06	19	13	14	Warning	-	0.6476	-	0.8941	-	0.2765	-	0.7286	Mitochondria	0.6775	-	1.0000	+	0.8210	+	0.8181	-	0.9612	-	0.6500	+	0.6144	+	0.7535	-	0.6287	+	0.7322	-	0.8025	-	0.8264	-
MOL007930	hesperidin	COc1ccc(cc1O)[C@@H]2CC(=O)c3c(O)cc(O[C@@H]4O[C@H](CO[C@@H]5O[C@@H](C)[C@H](O)[C@@H](O)[C@H]5O)[C@@H](O)[C@H](O)[C@H]4O)cc3O2	Zhishi	610.561	Database: TCMSP (http://tcmspnw.com)	167	U.S. Patent Application No. 15/573,583.	1e-06	0.1714	0.0197228	N/A	-1.16	15	8	7	Warning	+	0.8161	-	0.8816	-	0.9570	-	0.8286	Mitochondria	0.6902	-	0.8556	+	0.9414	+	0.9479	-	0.9600	-	0.8250	+	0.7312	-	0.9166	-	0.5059	+	0.6304	-	1.0000	-	0.8428	-
zhishi_011	Nomilinic acid glucoside	CC(=O)O[C@H](CC(=O)O)[C@@]1(C)[C@@H](CC(=O)[C@]2(C)[C@@H]1CC[C@@](C)([C@@H](O[C@@H]3O[C@H](CO)[C@@H](O)[C@H](O)[C@H]3O)c4cocc4)[C@@]25O[C@@H]5C(=O)O)C(C)(C)O	Zhishi	712.735	Book: Chemical Components of Source Plants in Traditional Chinese Medicine (ISBN: 9787030235534)	167	U.S. Patent Application No. 15/573,583.	1e-06	0.2	0.0197146	N/A	0.55	14	7	11	In domain	+	0.6693	-	0.8662	+	0.8371	-	0.8000	Mitochondria	0.7432	-	1.0000	+	0.8006	+	0.9042	-	0.9800	-	0.6000	-	0.6281	+	0.7204	+	0.6557	+	0.7154	-	1.0000	-	0.8698	+
MOL007206	Armepavine	COc1cc2CCN(C)[C@H](Cc3ccc(O)cc3)c2cc1OC	Lianzixin	313.391	Database: TCMSP (http://tcmspnw.com)	42	U.S. Patent Application No. 15/573,583.	1e-06	0.3429	0.0193331	N/A	3.18	4	1	4	In domain	+	0.9928	+	0.9077	+	0.9902	-	0.6571	Mitochondria	0.7303	-	0.8582	+	0.9223	+	0.9487	-	0.8600	+	0.5500	+	0.7025	+	0.6075	+	0.6796	+	0.6515	+	0.7825	+	0.8432	-
maidong_018	Ophiopogon A	C[C@@H]1CC[C@@]2(OC1)O[C@@H]3C[C@@]4(O)[C@@H]5CC=C6C[C@H](CC[C@]6(C)[C@H]5CC[C@]4(C)[C@@]3(O)[C@@H]2C)O[C@@H]7O[C@H](CO)[C@@H](O)[C@@H](O[C@@H]8OC[C@@H](O)[C@@H](O)[C@H]8O)[C@H]7O[C@H]9O[C@H](C)[C@H](O)[C@@H](O)[C@H]9O	Maidong	887.016	Book: Chemical Components of Source Plants in Traditional Chinese Medicine (ISBN: 9787030235534)	250	U.S. Patent Application No. 15/573,583.	1e-06	0.1571	0.0186275	N/A	-0.92	18	10	7	Warning	-	0.5716	-	0.8880	-	0.3181	-	0.8429	Mitochondria	0.7376	-	1.0000	+	0.8480	+	0.8994	-	0.9800	-	0.5500	+	0.8585	+	0.7318	+	0.6640	+	0.7423	-	0.7915	-	0.8348	-
kushen_070	Sophoraflavoside IV	C[C@H]1O[C@@H](O[C@@H]2[C@@H](O)[C@@H](O)[C@H](CO)O[C@H]2O[C@H]3[C@H](O)[C@@H](O)[C@@H](O[C@@H]3O[C@H]4CC[C@]5(C)[C@H](CC[C@]6(C)[C@@H]5CC=C7[C@@H]8C[C@](C)(C[C@H](O[C@H]9OC[C@H](O)[C@@H](O)[C@@H]9O[C@H]%10[C@H](O)O[C@H](CO)[C@@H](O)[C@H]%10O)[C@@]8(C)CC[C@@]67C)C(=O)O)[C@@]4(C)CO)C(=O)O)[C@H](O)[C@@H](O)[C@@H]1O	Kushen	1267.36	Book: Chemical Components of Source Plants in Traditional Chinese Medicine (ISBN: 9787030235534)	250	U.S. Patent Application No. 15/573,583.	1e-06	0.2143	0.0177841	N/A	-3.94	27	17	15	Warning	-	0.6211	-	0.8780	-	0.4075	-	0.7857	Mitochondria	0.8439	-	1.0000	+	0.8158	-	0.3315	-	1.0000	-	0.5298	+	0.8957	+	0.7454	+	0.5781	+	0.7408	-	1.0000	-	0.8769	-
kushen_075	Soyasaponin I	C[C@@H]1O[C@H](O[C@@H]2[C@@H](O)[C@@H](O)[C@@H](CO)O[C@@H]2O[C@@H]3[C@H](O)[C@H](O)[C@H](O[C@@H]3O[C@H]4CC[C@@]5(C)[C@@H](CC[C@]6(C)[C@@H]5CC=C7[C@@H]8CC(C)(C)C[C@@H](O)[C@]8(C)CC[C@@]67C)[C@@]4(C)CO)C(=O)O)[C@H](O)[C@H](O)[C@H]1O	Kushen	943.122	Book: Chemical Components of Source Plants in Traditional Chinese Medicine (ISBN: 9787030235534)	250	U.S. Patent Application No. 15/573,583.	1e-06	0.1571	0.0175194	N/A	0.70	17	11	9	Warning	-	0.6332	-	0.9373	-	0.2695	-	0.8429	Mitochondria	0.8567	-	1.0000	+	0.8400	-	0.5700	-	1.0000	-	0.6276	+	0.7841	+	0.7526	-	0.6924	+	0.7177	-	1.0000	-	0.8798	-
renshen_108	Notoginsenoside R1	CC(=CCC[C@@](C)(O[C@H]1O[C@H](CO)[C@@H](O)[C@H](O)[C@H]1O)[C@H]2CC[C@]3(C)[C@@H]2[C@H](O)C[C@@H]4[C@@]5(C)CC[C@H](O)C(C)(C)[C@@H]5[C@H](C[C@@]34C)O[C@H]6O[C@H](CO)[C@@H](O)[C@H](O)[C@H]6O[C@H]7OC[C@@H](O)[C@H](O)[C@H]7O)C	Renshen	933.127	Book: Chemical Components of Source Plants in Traditional Chinese Medicine (ISBN: 9787030235534)	167	U.S. Patent Application No. 15/573,583.	1e-06	0.2286	0.0172117	N/A	-0.42	18	12	12	Warning	-	0.6476	-	0.8903	-	0.2765	-	0.7714	Mitochondria	0.7251	-	1.0000	+	0.8277	+	0.8189	-	0.9612	-	0.6000	-	0.5197	+	0.7719	-	0.5436	+	0.7346	-	0.8025	-	0.8264	-
[truncated: 36 more rows]
[truncated: 59 more columns]
