# Supplementary material for: A Network Pharmacology Study of the Multi-Targeting Profile of an Antiarrhythmic Chinese Medicine Xin Su Ning
Source: Front Pharmacol. 2019 Sep 25;10:1138. doi: 10.3389/fphar.2019.01138 (PMC6774044; doi:10.3389/fphar.2019.01138)
Supplement: Table S2 — XSN component target relationships. [file Table_2.xlsx]

## Sheet: Sheet2
Gene_Symbol	Target_Weight_Coefficient
JUN	83.5258
AARS	1.81342
AARS2	1.02083
ABAT	4.5766
ABCB1	2586.08
ABCB11	1.16128
ABCC1	1.13861
ABCC2	0.150128
ABCC8	13817.5
ABCG2	1.48389
ABL1	0.258814
ACACA	0.628163
ACE	0.441608
ACHE	17809.8
ACOT1	0.239651
ACP1	0.204143
ACPP	0.420896
ADA	0.0150114
ADAM17	0.441608
ADCYAP1	0.0306124
ADH1A	3.55202
ADH1B	2.3196
ADH1C	2.7078
ADORA1	0.0150114
ADORA2A	0.0150114
ADORA2B	0.0150114
ADORA3	0.819199
ADRA1A	1.27476
ADRA1B	2.01865
ADRA1D	0.890305
ADRA2A	2.07908
ADRA2B	13818.7
ADRA2C	13818.7
ADRB1	0.574271
ADRB2	706.519
ADSSL1	1.57395
AGC1	0.553123
AGXT	5.37436
AGXT2	2.44251
AHR	13818.2
AKR1B1	255.748
AKR1B10	84.0626
AKR1C1	1.53046
AKR1C3	0.696725
AKR1C4	83.1407
AKT1	0.26387
ALAS1	1.02083
ALAS2	1.02083
ALDH1A1	1.02083
ALDH2	1.09079
ALDH5A1	2.22988
ALK	0.159066
ALOX12	0.489599
ALOX15	0.42037
ALOX15B	0.42037
ALOX5	4.3363
ALPI	0.584192
ALPL	0.584192
AMD1	1.42168
AMY1A	1.13769
AMY2A	1.11822
AOX1	1.03816
APAF1	2005.18
APP	1.70546
AR	16076.1
ARG1	1.57395
ARG2	0.520836
ASNS	1.02083
ATAD5	12.7491
ATG4B	0.1619
ATP2C1	1.73117
ATP5B	0.373667
ATP6V0A4	1.02083
ATXN2	12.7491
AURKB	1.95259
AVPR1B	0.159066
AVPR2	0.159066
BACE1	623.862
BAZ2B	593.657
BCAT	2.10533
BCAT1	0.492546
BCHE	13823
BCL2	0.58513
BCL2L1	2005.18
BCL2L11	27.6724
BTK	0.37532
CA1	6.32218
CA12	5.65817
CA13	0.746825
CA14	4.49225
CA2	6.32218
CA3	3.60101
CA4	5.68807
CA5A	3.60101
CA5B	3.60101
CA6	4.0986
CA7	5.65817
CA9	5.00259
CACNA1B	593.657
CACNA1S	0.140305
CALM1	790.298
CALM3	593.949
CAMK2B	0.159066
CASP3	83.1407
CASP7	83.2982
CAT	1.02083
CBR1	0.132693
CCL2	0.364346
CCNA2	36.3457
CCR4	0.159066
CD38	0.31655
CD80	0.172528
CD86	0.362031
CDC25B	1.99042
CDK1	0.920766
CDK2	0.529666
CDK4	0.700721
CDK6	0.548215
CES1	83.5759
CES2	83.2939
CFTR	13.2182
CHEK1	0.350893
CHKB	1.02083
CHRM1	13818.2
CHRM2	0.769623
CHRM3	0.769623
CHRM4	13818.8
CHRM5	0.159066
CHRNA2	1.75533
CHRNA4	0.808113
CHRNA7	28.0571
CHUK	0.321599
CISD1	0.227627
CKM	0.553123
COL1A1	0.677633
COL3A1	0.452823
CPT2	1.02083
CRYZ	0.189503
CSNK2A1	0.628163
CTBP2	0.330532
CTDSP1	593.885
CTH	4.38194
CTNNB1	1.02083
CTRB1	6.92962
CTRC	0.159066
CTSB	0.439253
CTSD	3.86991
CTSL	2005.78
CXCR1	0.159066
CYCS	0.730402
CYP19A1	406.753
CYP1A1	2.03433
CYP1A2	0.227627
CYP1B1	2.03433
CYP2A6	1.51081
CYP2B6	2584.2
CYP2C19	83.2998
CYP2C8	0.159066
CYP2C9	83.5274
CYP2D6	83.9286
CYP3A4	24375.8
DAO	1.39694
DAPK1	1.27458
DDC	0.0352046
DDO	1.39694
DHCR7	0.121204
DHODH	1.02083
DNPEP	0.143616
DPP3	1.01327
DPP4	108.992
DRD1	1.24813
DRD2	2584.2
DRD4	0.187923
DRD5	0.159066
DUSP3	0.475528
EGF	0.159066
EGFR	1.58851
EGLN1	0.677771
EHMT2	169.079
ELANE	0.44552
ENPEP	0.143616
EPHX2	0.159066
ESR1	14661.9
ESR2	84.3344
ESRRA	13900.8
F10	2.07707
F12	0.281961
F13A1	1.81342
F2	0.790969
F3	1.35429
F7	1.72286
FAAH	0.143616
FABP1	0.143616
FABP2	0.22481
FABP3	0.325017
FABP4	0.59012
FABP5	0.628084
FASN	1.89307
FFAR1	0.434635
FFAR4	0.262107
FLT3	1.40727
FTO	1.29542
FUT6	0.441608
FUT7	1.33285
GAA	0.261305
GABBR1	0.670194
GABRA1	1.76604
GABRA2	1.76604
GABRA3	1.74829
GABRA4	0.554166
GABRA5	2.70865
GABRA6	14.9091
GABRR1	0.670194
GABRR3	0.670194
GALE	1.81342
GAPDH	15823.2
GARS	1.02083
GATM	7.01172
GCAT	1.81342
GCLC	0.236484
GIG18	7.20669
GJA1	83.2998
GLDC	1.02083
GLI3	13900.5
GLIPR2	1.16128
GLO1	0.805482
GLP1R	12.7491
GLRA1	2.38615
GLRA2	1.02083
GLRA3	1.02083
GLUD1	2.51125
GLUD2	1.57395
GLYAT	1.02083
GLYATL1	1.02083
GMNN	95.8898
GNAO1	83.1407
GNMT	1.02083
GOT1	3.15256
GOT2	4.48795
GPBAR1	0.37315
GPHN	1.02083
GPI	1.02083
GPR35	0.577855
GPT	3.70646
GPT2	1497.66
GRIA1	2.09479
GRIA2	7.92729
GRIA3	0.520836
GRIA4	0.520836
GRIK2	2.09479
GRIK3	0.520836
GRIK5	0.520836
GRIN1	2.99752
GRIN2A	1.54167
GRIN2B	1.02083
GRIN3A	1.68741
GRK2	593.657
GRM1	1.07396
GRM2	1.07396
GRM3	0.520836
GRM4	0.520836
GRM5	0.520836
GRM6	1.07396
GRM7	0.520836
GRM8	0.520836
GSK3B	1.15838
GSR	0.812594
GSTA1	2584.2
GSTA2	0.236484
GSTM1	0.536821
GSTM2	0.386693
GSTO1	2005.18
GSTP1	1.91557
GUSB	1.16128
GYS1	1.02083
HBEGF	0.0791175
HCAR2	0.847841
HCAR3	0.505455
HCRTR1	18961.9
HIF1A	13900.5
HIF1AN	0.159066
HMGCR	0.710929
HMOX1	1498.02
HNF4A	0.38654
HOXA9	4589.38
HPSE	762.736
HSD11B1	1579.9
HSD11B2	1579.82
HSD17B1	84.0426
HSD17B2	84.2016
HSD17B3	0.730402
HSF1	0.159066
HSP90AA1	1.23484
HSP90AB1	0.500395
HSPA1A	0.0585494
HSPA5	0.261497
HSPA8	0.0150114
HSPB1	83.1407
HTR1A	0.505366
HTR1D	0.159066
HTR2A	0.180296
HTR2B	13817.4
HTR3A	0.386258
HTR5A	0.159066
HTR6	0.159066
HTR7	0.42037
HYAL1	0.850804
IDH1	82.7837
IDO1	0.321599
IFNB1	1.16128
IFNG	1.6953
IGF1R	0.159066
IGHG1	9.37506
IGHG2	0.26183
IKBKB	1.02083
IL1B	12.823
IL2	3.51926
IL6	0.901556
IMPDH1	0.0150114
IMPDH2	0.0150114
INPP5D	3.43711
INPPL1	3.43711
INS	0.68659
INSR	1.01327
ITGB2	0.0738773
JAK2	2032.71
KCNH2	13942.1
KCNJ11	13817.4
KCNJ3	169.079
KCNJ5	169.079
KCNMA1	4.53844
KDM4E	0.677771
KDR	0.435257
KLK7	0.161504
KYNU	1.64992
LCK	0.785648
LCT	0.687804
LDHA	1.81342
LDHB	1.81342
LDLR	0.132693
LMNA	83.1407
LPL	0.143616
LTA4H	2.44562
LTF	1.02083
LY96	0.097519
MAN2A1	0.26183
MAOA	4.1337
MAOB	3.46218
MAP2	0.268119
MAPK1	0.290177
MAPK10	2.2754
MAPK14	1.84015
MAPK3	0.132693
MAPK8	0.413999
MAPT	15905.7
MARS	1.57395
MAT1A	2.13173
MAT2A	0.969589
MCL1	2005.18
MDM2	12.7491
MDM4	12.7491
ME1	1.81342
ME2	6.5365
ME3	4.81935
MET	0.31655
MGAM	0.607483
MGST1	0.441608
MITF	12.7491
MMP1	1.6091
MMP10	0.0791175
MMP12	1.33738
MMP13	0.31655
MMP2	342.128
MMP3	1.8574
MMP7	0.441608
MMP8	1.02083
MMP9	0.691871
MPI	2005.56
MPO	1497.2
MS4A2	0.469097
MT-ND6	0.373667
MTR	1.02083
NAGS	1.02083
NCOA1	4.98007
NCOA2	55.4885
NEK2	0.159066
NEK6	0.159066
NEU2	1.27458
NFE2L2	13913.3
NFKB1	1.16128
NFS1	3.18563
NMUR2	702.27
NOS1	4.04183
NOS2	0.585789
NOS3	0.407855
NOX4	1.01327
NPSR1	2005.18
NQO1	0.284091
NQO2	0.383114
NR1H4	83.1407
NR1I2	2584.36
NR2F2	13817.4
NR3C1	2340.92
NR3C2	0.458955
NTRK2	0.143616
NUAK1	0.159066
OAT	2.85897
ODC1	0.628163
OPLAH	1.02083
OPRK1	0.159066
OPRM1	0.427184
OTC	2.13173
OXCT2	0.416466
OXTR	0.159066
P2RX2	0.043538
P2RX3	0.043538
P2RY1	0.043538
P2RY11	0.043538
P2RY2	0.043538
P3H1	0.416466
P3H3	0.969589
P4HA2	0.416466
P4HB	601.082
PAM	0.143616
PARP1	0.626582
PBRM1	0.157485
PC	1.02083
PCYT1A	0.22481
PDE10A	0.167089
PDE4A	0.315593
PDGFRB	30.3517
PDHB	1.02083
PDPK1	0.097519
PFAS	1.02083
PGR	83.7204
PHYKPL	1.81342
PIK3CG	0.920985
PIK3R1	0.159066
PIM1	37.3334
PIPOX	1.02083
PKIA	186.036
PKLR	1.81342
PKM	3.4121
PKN1	0.159066
PLA2G1B	2.06452
PLA2G2E	2.37158
PLA2G4A	0.107255
PLAA	0.584192
PLAT	0.159066
PLAU	2.16253
PLG	14.6846
PLIN1	0.22464
PLIN5	0.22464
PLK1	83.2998
PNP	1.02667
POLB	2006.19
POLI	2005.18
POLK	83.1407
PON1	1.73208
POR	0.232943
PPARA	0.0791175
PPARD	83.4703
PPARG	83.4617
PPP3CA	0.417131
PREP	13818.1
PRKCA	86.3427
PRKCB	83.1557
PRKCD	83.1407
PRKCH	83.1407
PRKCQ	0.097519
PRMT1	2005.18
PRSS1	15.7882
PRSS3	25.6036
PSIP1	0.485284
PTGER3	0.382616
PTGIS	1.16128
PTGS1	4.07016
PTGS2	4.35438
PTH1R	12.7491
PTK2	0.159066
PTP1B	153.146
PTPN1	548.287
PTPN11	83.2657
PTPN2	83.3449
PTPN6	83.3449
PTPN7	83.6162
PTPRCAP	0.0352046
PTPRE	0.0791175
PTPRF	0.204143
PYGL	1.1799
PYGM	1.76382
RAC1	0.37532
RAD52	16956.7
RAD54L	16956.7
RB1	1.68129
REN	2.71983
RGS19	83.1407
RHO	1.01035
ROCK2	0.321599
RORC	0.0791175
RRM1	1.02083
RXRA	84.3981
RXRB	0.716981
RXRG	0.349439
SAE1	2005.18
SARS	0.629091
SCN10A	0.261905
SCN5A	76.0138
SDHA	1.99042
SDS	0.629091
SELE	28.4362
SELL	0.441608
SELP	0.816929
SENP6	2005.18
SENP8	13817.4
SERPINE1	0.441608
SH2D1B	409.901
SHBG	0.132693
SHMT1	1.02083
SHMT2	1.81342
SI	0.261305
SIGMAR1	13817.4
SIRT1	33.8742
SLC1A1	0.520836
SLC1A2	0.520836
SLC1A3	0.520836
SLC22A8	1.16128
SLC25A10	1.4373
SLC25A12	0.553123
SLC25A13	1.57395
SLC28A1	0.0150114
SLC28A2	0.0150114
SLC28A3	0.0150114
SLC29A1	0.0150114
SLC36A1	2.44251
SLC47A1	0.505455
SLC5A1	0.0955646
SLC5A2	0.0955646
SLC6A1	0.670194
SLC6A11	0.670194
SLC6A12	0.670194
SLC6A2	0.830515
SLC6A3	1.8742
SLC6A4	0.710357
SLC6A9	1.02083
SLC7A1	0.493327
SLC7A4	0.493327
SLCO1A2	169.079
SLCO1B1	1579.82
SLCO1B3	1579.82
SLCO2A1	0.330532
SMAD2	83.1407
SMAD3	95.8898
SMARCA2	27.5288
SMPD1	16.1862
SOAT1	0.376515
SOD1	1.97582
SORD	1.15823
SRC	2.26049
SRR	1.91232
ST3GAL1	0.441608
STK33	0.387075
SUCLA2	0.416466
SULT1E1	0.159066
SYK	0.785648
TARDBP	2584.2
TARS	0.555014
TAT	1.16128
TBXA2R	0.0738773
TDP1	16497.5
TDP2	2005.18
TERT	13817.4
TH	0.0352046
THBD	0.159066
TKT	0.0491669
TLR2	0.22481
TNF	0.214461
TNKS	0.626582
TNKS2	0.626582
TNNC1	2017.93
TNNI3	2017.93
TNNT2	2017.93
TOP1	704.852
TOP2A	72.0602
TP53	13900.8
TPI1	6.54807
TPMT	1.08549
TPO	1.16128
TRHR	83.1407
TRPA1	1.00748
TRPV1	0.262107
TRPV3	0.189503
TSG101	2005.18
TSHR	83.1407
TTL	0.24879
TTR	1.0019
TXNRD1	1.4373
TXNRD3	0.097519
TYR	2.19024
UBA2	2005.18
UBE2I	2005.18
UBE2N	169.079
UBLCP1	1.16128
UGT1A1	0.497789
UGT1A4	0.236484
UGT1A6	0.236484
UGT2B10	0.236484
UHRF1	13817.4
USP1	2005.18
VCAM1	27.7761
VDR	83.1407
VEGFA	0.157485
XBP1	0.182564
XDH	4.87157
XIAP	0.227627
XPO1	0.236484
YARS2	1.02083

## Sheet: Sheet1
行标签	求和项:Component_Weight_Coefficient
JUN	83.5258
AARS	1.81342
AARS2	1.02083
ABAT	4.5766
ABCB1	2586.08
ABCB11	1.16128
ABCC1	1.13861
ABCC2	0.150128
ABCC8	13817.5
ABCG2	1.48389
ABL1	0.258814
ACACA	0.628163
ACE	0.441608
ACHE	17809.8
ACOT1	0.239651
ACP1	0.204143
ACPP	0.420896
ADA	0.0150114
ADAM17	0.441608
ADCYAP1	0.0306124
ADH1A	3.55202
ADH1B	2.3196
ADH1C	2.7078
ADORA1	0.0150114
ADORA2A	0.0150114
ADORA2B	0.0150114
ADORA3	0.819199
ADRA1A	1.27476
ADRA1B	2.01865
ADRA1D	0.890305
ADRA2A	2.07908
ADRA2B	13818.7
ADRA2C	13818.7
ADRB1	0.574271
ADRB2	706.519
ADSSL1	1.57395
AGC1	0.553123
AGXT	5.37436
AGXT2	2.44251
AHR	13818.2
AKR1B1	255.748
AKR1B10	84.0626
AKR1C1	1.53046
AKR1C3	0.696725
AKR1C4	83.1407
AKT1	0.26387
ALAS1	1.02083
ALAS2	1.02083
ALDH1A1	1.02083
ALDH2	1.09079
ALDH5A1	2.22988
ALK	0.159066
ALOX12	0.489599
ALOX15	0.42037
ALOX15B	0.42037
ALOX5	4.3363
ALPI	0.584192
ALPL	0.584192
AMD1	1.42168
AMY1A	1.13769
AMY2A	1.11822
AOX1	1.03816
APAF1	2005.18
APP	1.70546
AR	16076.1
ARG1	1.57395
ARG2	0.520836
ASNS	1.02083
ATAD5	12.7491
ATG4B	0.1619
ATP2C1	1.73117
ATP5B	0.373667
ATP6V0A4	1.02083
ATXN2	12.7491
AURKB	1.95259
AVPR1B	0.159066
AVPR2	0.159066
BACE1	623.862
BAZ2B	593.657
BCAT	2.10533
BCAT1	0.492546
BCHE	13823
BCL2	0.58513
BCL2L1	2005.18
BCL2L11	27.6724
BTK	0.37532
CA1	6.32218
CA12	5.65817
CA13	0.746825
CA14	4.49225
CA2	6.32218
CA3	3.60101
CA4	5.68807
CA5A	3.60101
CA5B	3.60101
CA6	4.0986
CA7	5.65817
CA9	5.00259
CACNA1B	593.657
CACNA1S	0.140305
CALM1	790.298
CALM3	593.949
CAMK2B	0.159066
CASP3	83.1407
CASP7	83.2982
CAT	1.02083
CBR1	0.132693
CCL2	0.364346
CCNA2	36.3457
CCR4	0.159066
CD38	0.31655
CD80	0.172528
CD86	0.362031
CDC25B	1.99042
CDK1	0.920766
CDK2	0.529666
CDK4	0.700721
CDK6	0.548215
CES1	83.5759
CES2	83.2939
CFTR	13.2182
CHEK1	0.350893
CHKB	1.02083
CHRM1	13818.2
CHRM2	0.769623
CHRM3	0.769623
CHRM4	13818.8
CHRM5	0.159066
CHRNA2	1.75533
CHRNA4	0.808113
CHRNA7	28.0571
CHUK	0.321599
CISD1	0.227627
CKM	0.553123
COL1A1	0.677633
COL3A1	0.452823
CPT2	1.02083
CRYZ	0.189503
CSNK2A1	0.628163
CTBP2	0.330532
CTDSP1	593.885
CTH	4.38194
CTNNB1	1.02083
CTRB1	6.92962
CTRC	0.159066
CTSB	0.439253
CTSD	3.86991
CTSL	2005.78
CXCR1	0.159066
CYCS	0.730402
CYP19A1	406.753
CYP1A1	2.03433
CYP1A2	0.227627
CYP1B1	2.03433
CYP2A6	1.51081
CYP2B6	2584.2
CYP2C19	83.2998
CYP2C8	0.159066
CYP2C9	83.5274
CYP2D6	83.9286
CYP3A4	24375.8
DAO	1.39694
DAPK1	1.27458
DDC	0.0352046
DDO	1.39694
DHCR7	0.121204
DHODH	1.02083
DNPEP	0.143616
DPP3	1.01327
DPP4	108.992
DRD1	1.24813
DRD2	2584.2
DRD4	0.187923
DRD5	0.159066
DUSP3	0.475528
EGF	0.159066
EGFR	1.58851
EGLN1	0.677771
EHMT2	169.079
ELANE	0.44552
ENPEP	0.143616
EPHX2	0.159066
ESR1	14661.9
ESR2	84.3344
ESRRA	13900.8
F10	2.07707
F12	0.281961
F13A1	1.81342
F2	0.790969
F3	1.35429
F7	1.72286
FAAH	0.143616
FABP1	0.143616
FABP2	0.22481
FABP3	0.325017
FABP4	0.59012
FABP5	0.628084
FASN	1.89307
FFAR1	0.434635
FFAR4	0.262107
FLT3	1.40727
FTO	1.29542
FUT6	0.441608
FUT7	1.33285
GAA	0.261305
GABBR1	0.670194
GABRA1	1.76604
GABRA2	1.76604
GABRA3	1.74829
GABRA4	0.554166
GABRA5	2.70865
GABRA6	14.9091
GABRR1	0.670194
GABRR3	0.670194
GALE	1.81342
GAPDH	15823.2
GARS	1.02083
GATM	7.01172
GCAT	1.81342
GCLC	0.236484
GIG18	7.20669
GJA1	83.2998
GLDC	1.02083
GLI3	13900.5
GLIPR2	1.16128
GLO1	0.805482
GLP1R	12.7491
GLRA1	2.38615
GLRA2	1.02083
GLRA3	1.02083
GLUD1	2.51125
GLUD2	1.57395
GLYAT	1.02083
GLYATL1	1.02083
GMNN	95.8898
GNAO1	83.1407
GNMT	1.02083
GOT1	3.15256
GOT2	4.48795
GPBAR1	0.37315
GPHN	1.02083
GPI	1.02083
GPR35	0.577855
GPT	3.70646
GPT2	1497.66
GRIA1	2.09479
GRIA2	7.92729
GRIA3	0.520836
GRIA4	0.520836
GRIK2	2.09479
GRIK3	0.520836
GRIK5	0.520836
GRIN1	2.99752
GRIN2A	1.54167
GRIN2B	1.02083
GRIN3A	1.68741
GRK2	593.657
GRM1	1.07396
GRM2	1.07396
GRM3	0.520836
GRM4	0.520836
GRM5	0.520836
GRM6	1.07396
GRM7	0.520836
GRM8	0.520836
GSK3B	1.15838
GSR	0.812594
GSTA1	2584.2
GSTA2	0.236484
GSTM1	0.536821
GSTM2	0.386693
GSTO1	2005.18
GSTP1	1.91557
GUSB	1.16128
GYS1	1.02083
HBEGF	0.0791175
HCAR2	0.847841
HCAR3	0.505455
HCRTR1	18961.9
HIF1A	13900.5
HIF1AN	0.159066
HMGCR	0.710929
HMOX1	1498.02
HNF4A	0.38654
HOXA9	4589.38
HPSE	762.736
HSD11B1	1579.9
HSD11B2	1579.82
HSD17B1	84.0426
HSD17B2	84.2016
HSD17B3	0.730402
HSF1	0.159066
HSP90AA1	1.23484
HSP90AB1	0.500395
HSPA1A	0.0585494
HSPA5	0.261497
HSPA8	0.0150114
HSPB1	83.1407
HTR1A	0.505366
HTR1D	0.159066
HTR2A	0.180296
HTR2B	13817.4
HTR3A	0.386258
HTR5A	0.159066
HTR6	0.159066
HTR7	0.42037
HYAL1	0.850804
IDH1	82.7837
IDO1	0.321599
IFNB1	1.16128
IFNG	1.6953
IGF1R	0.159066
IGHG1	9.37506
IGHG2	0.26183
IKBKB	1.02083
IL1B	12.823
IL2	3.51926
IL6	0.901556
IMPDH1	0.0150114
IMPDH2	0.0150114
INPP5D	3.43711
INPPL1	3.43711
INS	0.68659
INSR	1.01327
ITGB2	0.0738773
JAK2	2032.71
KCNH2	13942.1
KCNJ11	13817.4
KCNJ3	169.079
KCNJ5	169.079
KCNMA1	4.53844
KDM4E	0.677771
KDR	0.435257
KLK7	0.161504
KYNU	1.64992
LCK	0.785648
LCT	0.687804
LDHA	1.81342
LDHB	1.81342
LDLR	0.132693
LMNA	83.1407
LPL	0.143616
LTA4H	2.44562
LTF	1.02083
LY96	0.097519
MAN2A1	0.26183
MAOA	4.1337
MAOB	3.46218
MAP2	0.268119
MAPK1	0.290177
MAPK10	2.2754
MAPK14	1.84015
MAPK3	0.132693
MAPK8	0.413999
MAPT	15905.7
MARS	1.57395
MAT1A	2.13173
MAT2A	0.969589
MCL1	2005.18
MDM2	12.7491
MDM4	12.7491
ME1	1.81342
ME2	6.5365
ME3	4.81935
MET	0.31655
MGAM	0.607483
MGST1	0.441608
MITF	12.7491
MMP1	1.6091
MMP10	0.0791175
MMP12	1.33738
MMP13	0.31655
MMP2	342.128
MMP3	1.8574
MMP7	0.441608
MMP8	1.02083
MMP9	0.691871
MPI	2005.56
MPO	1497.2
MS4A2	0.469097
MT-ND6	0.373667
MTR	1.02083
NAGS	1.02083
NCOA1	4.98007
NCOA2	55.4885
NEK2	0.159066
NEK6	0.159066
NEU2	1.27458
NFE2L2	13913.3
NFKB1	1.16128
NFS1	3.18563
NMUR2	702.27
NOS1	4.04183
NOS2	0.585789
NOS3	0.407855
NOX4	1.01327
NPSR1	2005.18
NQO1	0.284091
NQO2	0.383114
NR1H4	83.1407
NR1I2	2584.36
NR2F2	13817.4
NR3C1	2340.92
NR3C2	0.458955
NTRK2	0.143616
NUAK1	0.159066
OAT	2.85897
ODC1	0.628163
OPLAH	1.02083
OPRK1	0.159066
OPRM1	0.427184
OTC	2.13173
OXCT2	0.416466
OXTR	0.159066
P2RX2	0.043538
P2RX3	0.043538
P2RY1	0.043538
P2RY11	0.043538
P2RY2	0.043538
P3H1	0.416466
P3H3	0.969589
P4HA2	0.416466
P4HB	601.082
PAM	0.143616
PARP1	0.626582
PBRM1	0.157485
PC	1.02083
PCYT1A	0.22481
PDE10A	0.167089
PDE4A	0.315593
PDGFRB	30.3517
PDHB	1.02083
PDPK1	0.097519
PFAS	1.02083
PGR	83.7204
PHYKPL	1.81342
PIK3CG	0.920985
PIK3R1	0.159066
PIM1	37.3334
PIPOX	1.02083
PKIA	186.036
PKLR	1.81342
PKM	3.4121
PKN1	0.159066
PLA2G1B	2.06452
PLA2G2E	2.37158
PLA2G4A	0.107255
PLAA	0.584192
PLAT	0.159066
PLAU	2.16253
PLG	14.6846
PLIN1	0.22464
PLIN5	0.22464
PLK1	83.2998
PNP	1.02667
POLB	2006.19
POLI	2005.18
POLK	83.1407
PON1	1.73208
POR	0.232943
PPARA	0.0791175
PPARD	83.4703
PPARG	83.4617
PPP3CA	0.417131
PREP	13818.1
PRKCA	86.3427
PRKCB	83.1557
PRKCD	83.1407
PRKCH	83.1407
PRKCQ	0.097519
PRMT1	2005.18
PRSS1	15.7882
PRSS3	25.6036
PSIP1	0.485284
PTGER3	0.382616
PTGIS	1.16128
PTGS1	4.07016
PTGS2	4.35438
PTH1R	12.7491
PTK2	0.159066
PTP1B	153.146
PTPN1	548.287
PTPN11	83.2657
PTPN2	83.3449
PTPN6	83.3449
PTPN7	83.6162
PTPRCAP	0.0352046
PTPRE	0.0791175
PTPRF	0.204143
PYGL	1.1799
PYGM	1.76382
RAC1	0.37532
RAD52	16956.7
RAD54L	16956.7
RB1	1.68129
REN	2.71983
RGS19	83.1407
RHO	1.01035
ROCK2	0.321599
RORC	0.0791175
RRM1	1.02083
RXRA	84.3981
RXRB	0.716981
RXRG	0.349439
SAE1	2005.18
SARS	0.629091
SCN10A	0.261905
SCN5A	76.0138
SDHA	1.99042
SDS	0.629091
SELE	28.4362
SELL	0.441608
SELP	0.816929
SENP6	2005.18
SENP8	13817.4
SERPINE1	0.441608
SH2D1B	409.901
SHBG	0.132693
SHMT1	1.02083
SHMT2	1.81342
SI	0.261305
SIGMAR1	13817.4
SIRT1	33.8742
SLC1A1	0.520836
SLC1A2	0.520836
SLC1A3	0.520836
SLC22A8	1.16128
SLC25A10	1.4373
SLC25A12	0.553123
SLC25A13	1.57395
SLC28A1	0.0150114
SLC28A2	0.0150114
SLC28A3	0.0150114
SLC29A1	0.0150114
SLC36A1	2.44251
SLC47A1	0.505455
SLC5A1	0.0955646
SLC5A2	0.0955646
SLC6A1	0.670194
SLC6A11	0.670194
SLC6A12	0.670194
SLC6A2	0.830515
SLC6A3	1.8742
SLC6A4	0.710357
SLC6A9	1.02083
SLC7A1	0.493327
SLC7A4	0.493327
SLCO1A2	169.079
SLCO1B1	1579.82
SLCO1B3	1579.82
SLCO2A1	0.330532
SMAD2	83.1407
SMAD3	95.8898
SMARCA2	27.5288
SMPD1	16.1862
SOAT1	0.376515
SOD1	1.97582
SORD	1.15823
SRC	2.26049
SRR	1.91232
ST3GAL1	0.441608
STK33	0.387075
SUCLA2	0.416466
SULT1E1	0.159066
SYK	0.785648
TARDBP	2584.2
TARS	0.555014
TAT	1.16128
TBXA2R	0.0738773
TDP1	16497.5
TDP2	2005.18
TERT	13817.4
TH	0.0352046
THBD	0.159066
TKT	0.0491669
TLR2	0.22481
TNF	0.214461
TNKS	0.626582
TNKS2	0.626582
TNNC1	2017.93
TNNI3	2017.93
TNNT2	2017.93
TOP1	704.852
TOP2A	72.0602
TP53	13900.8
TPI1	6.54807
TPMT	1.08549
TPO	1.16128
TRHR	83.1407
TRPA1	1.00748
TRPV1	0.262107
TRPV3	0.189503
TSG101	2005.18
TSHR	83.1407
TTL	0.24879
TTR	1.0019
TXNRD1	1.4373
TXNRD3	0.097519
TYR	2.19024
UBA2	2005.18
UBE2I	2005.18
UBE2N	169.079
UBLCP1	1.16128
UGT1A1	0.497789
UGT1A4	0.236484
UGT1A6	0.236484
UGT2B10	0.236484
UHRF1	13817.4
USP1	2005.18
VCAM1	27.7761
VDR	83.1407
VEGFA	0.157485
XBP1	0.182564
XDH	4.87157
XIAP	0.227627
XPO1	0.236484
YARS2	1.02083
(空白)
总计	555874

## Sheet: default
Library_Index	Component_Name	Herb_Source	Gene_Symbol	Component_Herb_Name	Component_Weight_Coefficient
banxia_003	Choline	Banxia	ACHE	Choline (Banxia)	0.302891
banxia_003	Choline	Banxia	CHRNA4	Choline (Banxia)	0.302891
banxia_005	Daucosterol	Banxia	CALM1	Daucosterol (Banxia)	0.0520907
banxia_005	Daucosterol	Banxia	HTR3A	Daucosterol (Banxia)	0.0520907
banxia_005	Daucosterol	Banxia	NCOA2	Daucosterol (Banxia)	0.0520907
banxia_005	Daucosterol	Banxia	POLB	Daucosterol (Banxia)	0.0520907
banxia_006	3,4-Dihydroxybenzoic acid	Banxia	ALOX5	3,4-Dihydroxybenzoic acid (Banxia)	0.448418
banxia_006	3,4-Dihydroxybenzoic acid	Banxia	CA1	3,4-Dihydroxybenzoic acid (Banxia)	0.448418
banxia_006	3,4-Dihydroxybenzoic acid	Banxia	CA12	3,4-Dihydroxybenzoic acid (Banxia)	0.448418
banxia_006	3,4-Dihydroxybenzoic acid	Banxia	CA14	3,4-Dihydroxybenzoic acid (Banxia)	0.448418
banxia_006	3,4-Dihydroxybenzoic acid	Banxia	CA2	3,4-Dihydroxybenzoic acid (Banxia)	0.448418
banxia_006	3,4-Dihydroxybenzoic acid	Banxia	CA4	3,4-Dihydroxybenzoic acid (Banxia)	0.448418
banxia_006	3,4-Dihydroxybenzoic acid	Banxia	CA6	3,4-Dihydroxybenzoic acid (Banxia)	0.448418
banxia_006	3,4-Dihydroxybenzoic acid	Banxia	CA7	3,4-Dihydroxybenzoic acid (Banxia)	0.448418
banxia_006	3,4-Dihydroxybenzoic acid	Banxia	CA9	3,4-Dihydroxybenzoic acid (Banxia)	0.448418
banxia_006	3,4-Dihydroxybenzoic acid	Banxia	CTSL	3,4-Dihydroxybenzoic acid (Banxia)	0.448418
banxia_006	3,4-Dihydroxybenzoic acid	Banxia	FUT7	3,4-Dihydroxybenzoic acid (Banxia)	0.448418
banxia_006	3,4-Dihydroxybenzoic acid	Banxia	MGAM	3,4-Dihydroxybenzoic acid (Banxia)	0.448418
banxia_006	3,4-Dihydroxybenzoic acid	Banxia	PRSS3	3,4-Dihydroxybenzoic acid (Banxia)	0.448418
banxia_007	Ephedrine	Banxia	ADRB2	Ephedrine (Banxia)	3.43711
banxia_007	Ephedrine	Banxia	INPP5D	Ephedrine (Banxia)	3.43711
banxia_007	Ephedrine	Banxia	INPPL1	Ephedrine (Banxia)	3.43711
banxia_007	Ephedrine	Banxia	SMPD1	Ephedrine (Banxia)	3.43711
banxia_011	Homogentisic acid	Banxia	CTRB1	Homogentisic acid (Banxia)	0.375296
banxia_014	1-Octene	Banxia	PRSS3	1-Octene (Banxia)	0.508849
banxia_015	1,5-Pentadiol	Banxia	PRSS3	1,5-Pentadiol (Banxia)	0.346281
banxia_017	Protocatechuic aldehyde	Banxia	CALM1	Protocatechuic aldehyde (Banxia)	0.402512
banxia_017	Protocatechuic aldehyde	Banxia	CCNA2	Protocatechuic aldehyde (Banxia)	0.402512
banxia_017	Protocatechuic aldehyde	Banxia	NCOA2	Protocatechuic aldehyde (Banxia)	0.402512
banxia_017	Protocatechuic aldehyde	Banxia	PIM1	Protocatechuic aldehyde (Banxia)	0.402512
banxia_017	Protocatechuic aldehyde	Banxia	PRSS1	Protocatechuic aldehyde (Banxia)	0.402512
banxia_017	Protocatechuic aldehyde	Banxia	RXRB	Protocatechuic aldehyde (Banxia)	0.402512
MOL000050	GLY	Banxia	AARS	GLY (Banxia)	1.02083
MOL000050	GLY	Banxia	AARS2	GLY (Banxia)	1.02083
MOL000050	GLY	Banxia	ABAT	GLY (Banxia)	1.02083
MOL000050	GLY	Banxia	ADH1A	GLY (Banxia)	1.02083
MOL000050	GLY	Banxia	ADH1B	GLY (Banxia)	1.02083
MOL000050	GLY	Banxia	ADH1C	GLY (Banxia)	1.02083
MOL000050	GLY	Banxia	ADSSL1	GLY (Banxia)	1.02083
MOL000050	GLY	Banxia	AGXT	GLY (Banxia)	1.02083
MOL000050	GLY	Banxia	AGXT2	GLY (Banxia)	1.02083
MOL000050	GLY	Banxia	AKR1B1	GLY (Banxia)	1.02083
MOL000050	GLY	Banxia	ALAS1	GLY (Banxia)	1.02083
MOL000050	GLY	Banxia	ALAS2	GLY (Banxia)	1.02083
MOL000050	GLY	Banxia	ALDH1A1	GLY (Banxia)	1.02083
MOL000050	GLY	Banxia	ALDH2	GLY (Banxia)	1.02083
MOL000050	GLY	Banxia	ALDH5A1	GLY (Banxia)	1.02083
MOL000050	GLY	Banxia	AMY2A	GLY (Banxia)	1.02083
MOL000050	GLY	Banxia	ARG1	GLY (Banxia)	1.02083
MOL000050	GLY	Banxia	ASNS	GLY (Banxia)	1.02083
MOL000050	GLY	Banxia	ATP2C1	GLY (Banxia)	1.02083
MOL000050	GLY	Banxia	ATP6V0A4	GLY (Banxia)	1.02083
MOL000050	GLY	Banxia	BCHE	GLY (Banxia)	1.02083
MOL000050	GLY	Banxia	CAT	GLY (Banxia)	1.02083
MOL000050	GLY	Banxia	CDC25B	GLY (Banxia)	1.02083
MOL000050	GLY	Banxia	CHKB	GLY (Banxia)	1.02083
MOL000050	GLY	Banxia	CPT2	GLY (Banxia)	1.02083
MOL000050	GLY	Banxia	CTH	GLY (Banxia)	1.02083
MOL000050	GLY	Banxia	CTNNB1	GLY (Banxia)	1.02083
MOL000050	GLY	Banxia	CTSD	GLY (Banxia)	1.02083
MOL000050	GLY	Banxia	DHODH	GLY (Banxia)	1.02083
MOL000050	GLY	Banxia	F13A1	GLY (Banxia)	1.02083
MOL000050	GLY	Banxia	F7	GLY (Banxia)	1.02083
MOL000050	GLY	Banxia	GALE	GLY (Banxia)	1.02083
MOL000050	GLY	Banxia	GARS	GLY (Banxia)	1.02083
MOL000050	GLY	Banxia	GATM	GLY (Banxia)	1.02083
MOL000050	GLY	Banxia	GCAT	GLY (Banxia)	1.02083
MOL000050	GLY	Banxia	GIG18	GLY (Banxia)	1.02083
MOL000050	GLY	Banxia	GLDC	GLY (Banxia)	1.02083
MOL000050	GLY	Banxia	GLRA1	GLY (Banxia)	1.02083
MOL000050	GLY	Banxia	GLRA2	GLY (Banxia)	1.02083
MOL000050	GLY	Banxia	GLRA3	GLY (Banxia)	1.02083
MOL000050	GLY	Banxia	GLUD1	GLY (Banxia)	1.02083
MOL000050	GLY	Banxia	GLUD2	GLY (Banxia)	1.02083
MOL000050	GLY	Banxia	GLYAT	GLY (Banxia)	1.02083
MOL000050	GLY	Banxia	GLYATL1	GLY (Banxia)	1.02083
MOL000050	GLY	Banxia	GNMT	GLY (Banxia)	1.02083
MOL000050	GLY	Banxia	GOT1	GLY (Banxia)	1.02083
MOL000050	GLY	Banxia	GOT2	GLY (Banxia)	1.02083
MOL000050	GLY	Banxia	GPHN	GLY (Banxia)	1.02083
MOL000050	GLY	Banxia	GPI	GLY (Banxia)	1.02083
MOL000050	GLY	Banxia	GPT	GLY (Banxia)	1.02083
MOL000050	GLY	Banxia	GPT2	GLY (Banxia)	1.02083
MOL000050	GLY	Banxia	GRIA1	GLY (Banxia)	1.02083
MOL000050	GLY	Banxia	GRIK2	GLY (Banxia)	1.02083
MOL000050	GLY	Banxia	GRIN1	GLY (Banxia)	1.02083
MOL000050	GLY	Banxia	GRIN2A	GLY (Banxia)	1.02083
MOL000050	GLY	Banxia	GRIN2B	GLY (Banxia)	1.02083
MOL000050	GLY	Banxia	GRIN3A	GLY (Banxia)	1.02083
MOL000050	GLY	Banxia	GYS1	GLY (Banxia)	1.02083
MOL000050	GLY	Banxia	IKBKB	GLY (Banxia)	1.02083
MOL000050	GLY	Banxia	KYNU	GLY (Banxia)	1.02083
MOL000050	GLY	Banxia	LDHA	GLY (Banxia)	1.02083
MOL000050	GLY	Banxia	LDHB	GLY (Banxia)	1.02083
MOL000050	GLY	Banxia	LTA4H	GLY (Banxia)	1.02083
MOL000050	GLY	Banxia	LTF	GLY (Banxia)	1.02083
MOL000050	GLY	Banxia	MAOA	GLY (Banxia)	1.02083
MOL000050	GLY	Banxia	MAOB	GLY (Banxia)	1.02083
MOL000050	GLY	Banxia	MARS	GLY (Banxia)	1.02083
MOL000050	GLY	Banxia	ME1	GLY (Banxia)	1.02083
MOL000050	GLY	Banxia	ME2	GLY (Banxia)	1.02083
MOL000050	GLY	Banxia	ME3	GLY (Banxia)	1.02083
MOL000050	GLY	Banxia	MMP12	GLY (Banxia)	1.02083
MOL000050	GLY	Banxia	MMP8	GLY (Banxia)	1.02083
MOL000050	GLY	Banxia	MTR	GLY (Banxia)	1.02083
MOL000050	GLY	Banxia	NAGS	GLY (Banxia)	1.02083
MOL000050	GLY	Banxia	NFS1	GLY (Banxia)	1.02083
MOL000050	GLY	Banxia	NOS1	GLY (Banxia)	1.02083
MOL000050	GLY	Banxia	OAT	GLY (Banxia)	1.02083
MOL000050	GLY	Banxia	OPLAH	GLY (Banxia)	1.02083
MOL000050	GLY	Banxia	PC	GLY (Banxia)	1.02083
MOL000050	GLY	Banxia	PDHB	GLY (Banxia)	1.02083
MOL000050	GLY	Banxia	PFAS	GLY (Banxia)	1.02083
MOL000050	GLY	Banxia	PHYKPL	GLY (Banxia)	1.02083
MOL000050	GLY	Banxia	PIPOX	GLY (Banxia)	1.02083
MOL000050	GLY	Banxia	PKLR	GLY (Banxia)	1.02083
MOL000050	GLY	Banxia	PKM	GLY (Banxia)	1.02083
MOL000050	GLY	Banxia	PLA2G1B	GLY (Banxia)	1.02083
MOL000050	GLY	Banxia	PLA2G2E	GLY (Banxia)	1.02083
MOL000050	GLY	Banxia	PLG	GLY (Banxia)	1.02083
MOL000050	GLY	Banxia	PRKCA	GLY (Banxia)	1.02083
MOL000050	GLY	Banxia	PRSS3	GLY (Banxia)	1.02083
MOL000050	GLY	Banxia	PTPN1	GLY (Banxia)	1.02083
MOL000050	GLY	Banxia	PYGL	GLY (Banxia)	1.02083
MOL000050	GLY	Banxia	PYGM	GLY (Banxia)	1.02083
MOL000050	GLY	Banxia	REN	GLY (Banxia)	1.02083
MOL000050	GLY	Banxia	RRM1	GLY (Banxia)	1.02083
MOL000050	GLY	Banxia	SDHA	GLY (Banxia)	1.02083
MOL000050	GLY	Banxia	SHMT1	GLY (Banxia)	1.02083
MOL000050	GLY	Banxia	SHMT2	GLY (Banxia)	1.02083
MOL000050	GLY	Banxia	SLC25A10	GLY (Banxia)	1.02083
MOL000050	GLY	Banxia	SLC25A13	GLY (Banxia)	1.02083
MOL000050	GLY	Banxia	SLC36A1	GLY (Banxia)	1.02083
MOL000050	GLY	Banxia	SLC6A9	GLY (Banxia)	1.02083
MOL000050	GLY	Banxia	SRC	GLY (Banxia)	1.02083
MOL000050	GLY	Banxia	SRR	GLY (Banxia)	1.02083
MOL000050	GLY	Banxia	TPI1	GLY (Banxia)	1.02083
MOL000050	GLY	Banxia	TXNRD1	GLY (Banxia)	1.02083
MOL000050	GLY	Banxia	XDH	GLY (Banxia)	1.02083
MOL000050	GLY	Banxia	YARS2	GLY (Banxia)	1.02083
MOL000052	Gulutamine	Banxia	ABAT	Gulutamine (Banxia)	0.520836
MOL000052	Gulutamine	Banxia	ADH1B	Gulutamine (Banxia)	0.520836
MOL000052	Gulutamine	Banxia	ADORA3	Gulutamine (Banxia)	0.520836
MOL000052	Gulutamine	Banxia	AKR1B1	Gulutamine (Banxia)	0.520836
MOL000052	Gulutamine	Banxia	ARG2	Gulutamine (Banxia)	0.520836
MOL000052	Gulutamine	Banxia	ATP2C1	Gulutamine (Banxia)	0.520836
MOL000052	Gulutamine	Banxia	CTSD	Gulutamine (Banxia)	0.520836
MOL000052	Gulutamine	Banxia	FTO	Gulutamine (Banxia)	0.520836
MOL000052	Gulutamine	Banxia	GABRA6	Gulutamine (Banxia)	0.520836
MOL000052	Gulutamine	Banxia	GIG18	Gulutamine (Banxia)	0.520836
MOL000052	Gulutamine	Banxia	GLUD1	Gulutamine (Banxia)	0.520836
MOL000052	Gulutamine	Banxia	GOT1	Gulutamine (Banxia)	0.520836
MOL000052	Gulutamine	Banxia	GOT2	Gulutamine (Banxia)	0.520836
MOL000052	Gulutamine	Banxia	GPT	Gulutamine (Banxia)	0.520836
MOL000052	Gulutamine	Banxia	GRIA1	Gulutamine (Banxia)	0.520836
MOL000052	Gulutamine	Banxia	GRIA2	Gulutamine (Banxia)	0.520836
MOL000052	Gulutamine	Banxia	GRIA3	Gulutamine (Banxia)	0.520836
MOL000052	Gulutamine	Banxia	GRIA4	Gulutamine (Banxia)	0.520836
MOL000052	Gulutamine	Banxia	lTA4H	Gulutamine (Banxia)	0.520836
MOL000052	Gulutamine	Banxia	GRIK2	Gulutamine (Banxia)	0.520836
MOL000052	Gulutamine	Banxia	GRIK3	Gulutamine (Banxia)	0.520836
MOL000052	Gulutamine	Banxia	GRIK5	Gulutamine (Banxia)	0.520836
MOL000052	Gulutamine	Banxia	GRIN2A	Gulutamine (Banxia)	0.520836
MOL000052	Gulutamine	Banxia	GRIN3A	Gulutamine (Banxia)	0.520836
MOL000052	Gulutamine	Banxia	GRM1	Gulutamine (Banxia)	0.520836
MOL000052	Gulutamine	Banxia	GRM2	Gulutamine (Banxia)	0.520836
MOL000052	Gulutamine	Banxia	GRM3	Gulutamine (Banxia)	0.520836
MOL000052	Gulutamine	Banxia	GRM4	Gulutamine (Banxia)	0.520836
MOL000052	Gulutamine	Banxia	GRM5	Gulutamine (Banxia)	0.520836
MOL000052	Gulutamine	Banxia	GRM6	Gulutamine (Banxia)	0.520836
MOL000052	Gulutamine	Banxia	GRM7	Gulutamine (Banxia)	0.520836
MOL000052	Gulutamine	Banxia	GRM8	Gulutamine (Banxia)	0.520836
MOL000052	Gulutamine	Banxia	GSR	Gulutamine (Banxia)	0.520836
MOL000052	Gulutamine	Banxia	LTA4H	Gulutamine (Banxia)	0.520836
MOL000052	Gulutamine	Banxia	MAT1A	Gulutamine (Banxia)	0.520836
MOL000052	Gulutamine	Banxia	ME2	Gulutamine (Banxia)	0.520836
MOL000052	Gulutamine	Banxia	NOS1	Gulutamine (Banxia)	0.520836
MOL000052	Gulutamine	Banxia	OTC	Gulutamine (Banxia)	0.520836
MOL000052	Gulutamine	Banxia	PLG	Gulutamine (Banxia)	0.520836
MOL000052	Gulutamine	Banxia	PRKCA	Gulutamine (Banxia)	0.520836
MOL000052	Gulutamine	Banxia	PTPN1	Gulutamine (Banxia)	0.520836
MOL000052	Gulutamine	Banxia	SLC1A1	Gulutamine (Banxia)	0.520836
MOL000052	Gulutamine	Banxia	SLC1A2	Gulutamine (Banxia)	0.520836
MOL000052	Gulutamine	Banxia	SLC1A3	Gulutamine (Banxia)	0.520836
MOL000052	Gulutamine	Banxia	TPI1	Gulutamine (Banxia)	0.520836
MOL000054	L-Arginine	Banxia	CYP3A4	L-Arginine (Banxia)	0.396727
MOL000054	L-Arginine	Banxia	NOS1	L-Arginine (Banxia)	0.396727
MOL000055	L-Lysin	Banxia	SLC7A1	L-Lysin (Banxia)	0.493327
MOL000055	L-Lysin	Banxia	SLC7A4	L-Lysin (Banxia)	0.493327
MOL000056	DTY	Banxia	ACHE	DTY (Banxia)	0.24879
MOL000056	DTY	Banxia	ADRA1A	DTY (Banxia)	0.24879
MOL000056	DTY	Banxia	ADRA1B	DTY (Banxia)	0.24879
MOL000056	DTY	Banxia	ADRA2A	DTY (Banxia)	0.24879
MOL000056	DTY	Banxia	ADRA2B	DTY (Banxia)	0.24879
MOL000056	DTY	Banxia	ADRA2C	DTY (Banxia)	0.24879
MOL000056	DTY	Banxia	ADRB1	DTY (Banxia)	0.24879
MOL000056	DTY	Banxia	ADRB2	DTY (Banxia)	0.24879
MOL000056	DTY	Banxia	CTRB1	DTY (Banxia)	0.24879
MOL000056	DTY	Banxia	DPP4	DTY (Banxia)	0.24879
MOL000056	DTY	Banxia	DRD1	DTY (Banxia)	0.24879
MOL000056	DTY	Banxia	F2	DTY (Banxia)	0.24879
MOL000056	DTY	Banxia	MAOA	DTY (Banxia)	0.24879
MOL000056	DTY	Banxia	MAOB	DTY (Banxia)	0.24879
MOL000056	DTY	Banxia	NOS3	DTY (Banxia)	0.24879
MOL000056	DTY	Banxia	PTPN1	DTY (Banxia)	0.24879
MOL000056	DTY	Banxia	SLC6A3	DTY (Banxia)	0.24879
MOL000056	DTY	Banxia	TTL	DTY (Banxia)	0.24879
MOL000065	ASI	Banxia	ABAT	ASI (Banxia)	0.553123
MOL000065	ASI	Banxia	ADH1B	ASI (Banxia)	0.553123
MOL000065	ASI	Banxia	ADH1C	ASI (Banxia)	0.553123
MOL000065	ASI	Banxia	ADSSL1	ASI (Banxia)	0.553123
MOL000065	ASI	Banxia	AGC1	ASI (Banxia)	0.553123
MOL000065	ASI	Banxia	AGXT	ASI (Banxia)	0.553123
MOL000065	ASI	Banxia	AKR1B1	ASI (Banxia)	0.553123
MOL000065	ASI	Banxia	ALOX5	ASI (Banxia)	0.553123
MOL000065	ASI	Banxia	ARG1	ASI (Banxia)	0.553123
MOL000065	ASI	Banxia	BCHE	ASI (Banxia)	0.553123
MOL000065	ASI	Banxia	CDC25B	ASI (Banxia)	0.553123
MOL000065	ASI	Banxia	CKM	ASI (Banxia)	0.553123
MOL000065	ASI	Banxia	CTSD	ASI (Banxia)	0.553123
MOL000065	ASI	Banxia	GATM	ASI (Banxia)	0.553123
MOL000065	ASI	Banxia	GIG18	ASI (Banxia)	0.553123
MOL000065	ASI	Banxia	GLUD1	ASI (Banxia)	0.553123
MOL000065	ASI	Banxia	GLUD2	ASI (Banxia)	0.553123
MOL000065	ASI	Banxia	GOT1	ASI (Banxia)	0.553123
MOL000065	ASI	Banxia	GOT2	ASI (Banxia)	0.553123
MOL000065	ASI	Banxia	GRIA1	ASI (Banxia)	0.553123
MOL000065	ASI	Banxia	GRIK2	ASI (Banxia)	0.553123
MOL000065	ASI	Banxia	GRM1	ASI (Banxia)	0.553123
MOL000065	ASI	Banxia	GRM2	ASI (Banxia)	0.553123
MOL000065	ASI	Banxia	GRM6	ASI (Banxia)	0.553123
MOL000065	ASI	Banxia	MARS	ASI (Banxia)	0.553123
MOL000065	ASI	Banxia	MAT1A	ASI (Banxia)	0.553123
MOL000065	ASI	Banxia	MAT2A	ASI (Banxia)	0.553123
MOL000065	ASI	Banxia	ME2	ASI (Banxia)	0.553123
MOL000065	ASI	Banxia	ME3	ASI (Banxia)	0.553123
MOL000065	ASI	Banxia	NOS1	ASI (Banxia)	0.553123
MOL000065	ASI	Banxia	OTC	ASI (Banxia)	0.553123
MOL000065	ASI	Banxia	P3H3	ASI (Banxia)	0.553123
MOL000065	ASI	Banxia	PKM	ASI (Banxia)	0.553123
MOL000065	ASI	Banxia	PLG	ASI (Banxia)	0.553123
MOL000065	ASI	Banxia	PRKCA	ASI (Banxia)	0.553123
MOL000065	ASI	Banxia	PTPN1	ASI (Banxia)	0.553123
MOL000065	ASI	Banxia	PYGM	ASI (Banxia)	0.553123
MOL000065	ASI	Banxia	SDHA	ASI (Banxia)	0.553123
MOL000065	ASI	Banxia	SLC25A12	ASI (Banxia)	0.553123
MOL000065	ASI	Banxia	SLC25A13	ASI (Banxia)	0.553123
MOL000065	ASI	Banxia	TPI1	ASI (Banxia)	0.553123
MOL000067	L-Valin	Banxia	ABAT	L-Valin (Banxia)	0.641302
MOL000067	L-Valin	Banxia	ADH1C	L-Valin (Banxia)	0.641302
MOL000067	L-Valin	Banxia	AKR1B1	L-Valin (Banxia)	0.641302
MOL000067	L-Valin	Banxia	BCAT	L-Valin (Banxia)	0.641302
MOL000067	L-Valin	Banxia	BCHE	L-Valin (Banxia)	0.641302
MOL000067	L-Valin	Banxia	CTH	L-Valin (Banxia)	0.641302
MOL000067	L-Valin	Banxia	CTSD	L-Valin (Banxia)	0.641302
MOL000067	L-Valin	Banxia	GATM	L-Valin (Banxia)	0.641302
MOL000067	L-Valin	Banxia	GIG18	L-Valin (Banxia)	0.641302
MOL000067	L-Valin	Banxia	GLRA1	L-Valin (Banxia)	0.641302
MOL000067	L-Valin	Banxia	GOT1	L-Valin (Banxia)	0.641302
MOL000067	L-Valin	Banxia	MAOB	L-Valin (Banxia)	0.641302
MOL000067	L-Valin	Banxia	MAT1A	L-Valin (Banxia)	0.641302
MOL000067	L-Valin	Banxia	ME2	L-Valin (Banxia)	0.641302
MOL000067	L-Valin	Banxia	NOS1	L-Valin (Banxia)	0.641302
MOL000067	L-Valin	Banxia	OTC	L-Valin (Banxia)	0.641302
MOL000067	L-Valin	Banxia	PLG	L-Valin (Banxia)	0.641302
MOL000067	L-Valin	Banxia	PTPN1	L-Valin (Banxia)	0.641302
MOL000068	L-Ile	Banxia	ABAT	L-Ile (Banxia)	0.492546
MOL000068	L-Ile	Banxia	ADH1C	L-Ile (Banxia)	0.492546
MOL000068	L-Ile	Banxia	BCAT	L-Ile (Banxia)	0.492546
MOL000068	L-Ile	Banxia	BCAT1	L-Ile (Banxia)	0.492546
MOL000068	L-Ile	Banxia	BCHE	L-Ile (Banxia)	0.492546
MOL000068	L-Ile	Banxia	CTSD	L-Ile (Banxia)	0.492546
MOL000068	L-Ile	Banxia	GABRA6	L-Ile (Banxia)	0.492546
MOL000068	L-Ile	Banxia	GATM	L-Ile (Banxia)	0.492546
MOL000068	L-Ile	Banxia	NOS1	L-Ile (Banxia)	0.492546
MOL000068	L-Ile	Banxia	PLG	L-Ile (Banxia)	0.492546
MOL000068	L-Ile	Banxia	REN	L-Ile (Banxia)	0.492546
MOL000172	Furol	Banxia	ADH1A	Furol (Banxia)	0.860035
MOL000223	caffeic acid	Banxia	ACHE	caffeic acid (Banxia)	0.37532
MOL000223	caffeic acid	Banxia	ADRA1D	caffeic acid (Banxia)	0.37532
MOL000223	caffeic acid	Banxia	AKR1B1	caffeic acid (Banxia)	0.37532
MOL000223	caffeic acid	Banxia	AKR1B10	caffeic acid (Banxia)	0.37532
MOL000223	caffeic acid	Banxia	ALOX5	caffeic acid (Banxia)	0.37532
MOL000223	caffeic acid	Banxia	BTK	caffeic acid (Banxia)	0.37532
MOL000223	caffeic acid	Banxia	CA1	caffeic acid (Banxia)	0.37532
MOL000223	caffeic acid	Banxia	CA12	caffeic acid (Banxia)	0.37532
MOL000223	caffeic acid	Banxia	CA14	caffeic acid (Banxia)	0.37532
MOL000223	caffeic acid	Banxia	CA2	caffeic acid (Banxia)	0.37532
MOL000223	caffeic acid	Banxia	CA3	caffeic acid (Banxia)	0.37532
MOL000223	caffeic acid	Banxia	CA4	caffeic acid (Banxia)	0.37532
MOL000223	caffeic acid	Banxia	CA5A	caffeic acid (Banxia)	0.37532
MOL000223	caffeic acid	Banxia	CA5B	caffeic acid (Banxia)	0.37532
MOL000223	caffeic acid	Banxia	CA6	caffeic acid (Banxia)	0.37532
MOL000223	caffeic acid	Banxia	CA7	caffeic acid (Banxia)	0.37532
MOL000223	caffeic acid	Banxia	CA9	caffeic acid (Banxia)	0.37532
MOL000223	caffeic acid	Banxia	CTRB1	caffeic acid (Banxia)	0.37532
MOL000223	caffeic acid	Banxia	DUSP3	caffeic acid (Banxia)	0.37532
MOL000223	caffeic acid	Banxia	EGFR	caffeic acid (Banxia)	0.37532
MOL000223	caffeic acid	Banxia	HSP90AA1	caffeic acid (Banxia)	0.37532
MOL000223	caffeic acid	Banxia	HYAL1	caffeic acid (Banxia)	0.37532
MOL000223	caffeic acid	Banxia	MMP1	caffeic acid (Banxia)	0.37532
MOL000223	caffeic acid	Banxia	MMP2	caffeic acid (Banxia)	0.37532
MOL000223	caffeic acid	Banxia	MMP9	caffeic acid (Banxia)	0.37532
MOL000223	caffeic acid	Banxia	PLAU	caffeic acid (Banxia)	0.37532
MOL000223	caffeic acid	Banxia	PTGS1	caffeic acid (Banxia)	0.37532
MOL000223	caffeic acid	Banxia	PTGS2	caffeic acid (Banxia)	0.37532
MOL000223	caffeic acid	Banxia	PTPN1	caffeic acid (Banxia)	0.37532
MOL000223	caffeic acid	Banxia	PTPN7	caffeic acid (Banxia)	0.37532
MOL000223	caffeic acid	Banxia	RAC1	caffeic acid (Banxia)	0.37532
MOL000223	caffeic acid	Banxia	SELP	caffeic acid (Banxia)	0.37532
MOL000223	caffeic acid	Banxia	TTR	caffeic acid (Banxia)	0.37532
MOL000388	gamma-aminobutyric acid	Banxia	ABAT	gamma-aminobutyric acid (Banxia)	0.670194
MOL000388	gamma-aminobutyric acid	Banxia	ADH1A	gamma-aminobutyric acid (Banxia)	0.670194
MOL000388	gamma-aminobutyric acid	Banxia	BCHE	gamma-aminobutyric acid (Banxia)	0.670194
MOL000388	gamma-aminobutyric acid	Banxia	GABBR1	gamma-aminobutyric acid (Banxia)	0.670194
MOL000388	gamma-aminobutyric acid	Banxia	GABRA1	gamma-aminobutyric acid (Banxia)	0.670194
MOL000388	gamma-aminobutyric acid	Banxia	GABRA2	gamma-aminobutyric acid (Banxia)	0.670194
MOL000388	gamma-aminobutyric acid	Banxia	GABRA3	gamma-aminobutyric acid (Banxia)	0.670194
MOL000388	gamma-aminobutyric acid	Banxia	GABRA5	gamma-aminobutyric acid (Banxia)	0.670194
MOL000388	gamma-aminobutyric acid	Banxia	GABRA6	gamma-aminobutyric acid (Banxia)	0.670194
MOL000388	gamma-aminobutyric acid	Banxia	GABRR1	gamma-aminobutyric acid (Banxia)	0.670194
MOL000388	gamma-aminobutyric acid	Banxia	GABRR3	gamma-aminobutyric acid (Banxia)	0.670194
MOL000388	gamma-aminobutyric acid	Banxia	GATM	gamma-aminobutyric acid (Banxia)	0.670194
MOL000388	gamma-aminobutyric acid	Banxia	GIG18	gamma-aminobutyric acid (Banxia)	0.670194
MOL000388	gamma-aminobutyric acid	Banxia	IL6	gamma-aminobutyric acid (Banxia)	0.670194
MOL000388	gamma-aminobutyric acid	Banxia	PLG	gamma-aminobutyric acid (Banxia)	0.670194
MOL000388	gamma-aminobutyric acid	Banxia	PRSS3	gamma-aminobutyric acid (Banxia)	0.670194
MOL000388	gamma-aminobutyric acid	Banxia	SLC6A1	gamma-aminobutyric acid (Banxia)	0.670194
MOL000388	gamma-aminobutyric acid	Banxia	SLC6A11	gamma-aminobutyric acid (Banxia)	0.670194
MOL000388	gamma-aminobutyric acid	Banxia	SLC6A12	gamma-aminobutyric acid (Banxia)	0.670194
MOL000389	FERULIC ACID (CIS)	Banxia	CTRB1	FERULIC ACID (CIS) (Banxia)	0.355901
MOL000397	cis-p-Coumarate	Banxia	CTRB1	cis-p-Coumarate (Banxia)	0.256276
MOL000397	cis-p-Coumarate	Banxia	GABRA6	cis-p-Coumarate (Banxia)	0.256276
MOL000432	linolenic acid	Banxia	ATG4B	linolenic acid (Banxia)	0.1619
MOL000432	linolenic acid	Banxia	CALM1	linolenic acid (Banxia)	0.1619
MOL000432	linolenic acid	Banxia	CYP19A1	linolenic acid (Banxia)	0.1619
MOL000432	linolenic acid	Banxia	F3	linolenic acid (Banxia)	0.1619
MOL000432	linolenic acid	Banxia	FFAR1	linolenic acid (Banxia)	0.1619
MOL000432	linolenic acid	Banxia	FFAR4	linolenic acid (Banxia)	0.1619
MOL000432	linolenic acid	Banxia	HNF4A	linolenic acid (Banxia)	0.1619
MOL000432	linolenic acid	Banxia	NCOA2	linolenic acid (Banxia)	0.1619
MOL000432	linolenic acid	Banxia	NR1I2	linolenic acid (Banxia)	0.1619
MOL000432	linolenic acid	Banxia	PLA2G1B	linolenic acid (Banxia)	0.1619
MOL000432	linolenic acid	Banxia	PPARG	linolenic acid (Banxia)	0.1619
MOL000432	linolenic acid	Banxia	RXRG	linolenic acid (Banxia)	0.1619
MOL000432	linolenic acid	Banxia	TRPV1	linolenic acid (Banxia)	0.1619
MOL000458	campesterol	Banxia	NCOA2	campesterol (Banxia)	0.119984
MOL000513	3,4,5-trihydroxybenzoic acid	Banxia	ACE	3,4,5-trihydroxybenzoic acid (Banxia)	0.441608
MOL000513	3,4,5-trihydroxybenzoic acid	Banxia	ADAM17	3,4,5-trihydroxybenzoic acid (Banxia)	0.441608
MOL000513	3,4,5-trihydroxybenzoic acid	Banxia	CA1	3,4,5-trihydroxybenzoic acid (Banxia)	0.441608
MOL000513	3,4,5-trihydroxybenzoic acid	Banxia	CA12	3,4,5-trihydroxybenzoic acid (Banxia)	0.441608
MOL000513	3,4,5-trihydroxybenzoic acid	Banxia	CA14	3,4,5-trihydroxybenzoic acid (Banxia)	0.441608
MOL000513	3,4,5-trihydroxybenzoic acid	Banxia	CA2	3,4,5-trihydroxybenzoic acid (Banxia)	0.441608
MOL000513	3,4,5-trihydroxybenzoic acid	Banxia	CA3	3,4,5-trihydroxybenzoic acid (Banxia)	0.441608
MOL000513	3,4,5-trihydroxybenzoic acid	Banxia	CA4	3,4,5-trihydroxybenzoic acid (Banxia)	0.441608
MOL000513	3,4,5-trihydroxybenzoic acid	Banxia	CA5A	3,4,5-trihydroxybenzoic acid (Banxia)	0.441608
MOL000513	3,4,5-trihydroxybenzoic acid	Banxia	CA5B	3,4,5-trihydroxybenzoic acid (Banxia)	0.441608
MOL000513	3,4,5-trihydroxybenzoic acid	Banxia	CA6	3,4,5-trihydroxybenzoic acid (Banxia)	0.441608
MOL000513	3,4,5-trihydroxybenzoic acid	Banxia	CA7	3,4,5-trihydroxybenzoic acid (Banxia)	0.441608
MOL000513	3,4,5-trihydroxybenzoic acid	Banxia	CA9	3,4,5-trihydroxybenzoic acid (Banxia)	0.441608
MOL000513	3,4,5-trihydroxybenzoic acid	Banxia	FASN	3,4,5-trihydroxybenzoic acid (Banxia)	0.441608
MOL000513	3,4,5-trihydroxybenzoic acid	Banxia	FUT6	3,4,5-trihydroxybenzoic acid (Banxia)	0.441608
MOL000513	3,4,5-trihydroxybenzoic acid	Banxia	FUT7	3,4,5-trihydroxybenzoic acid (Banxia)	0.441608
MOL000513	3,4,5-trihydroxybenzoic acid	Banxia	MGST1	3,4,5-trihydroxybenzoic acid (Banxia)	0.441608
MOL000513	3,4,5-trihydroxybenzoic acid	Banxia	MMP2	3,4,5-trihydroxybenzoic acid (Banxia)	0.441608
MOL000513	3,4,5-trihydroxybenzoic acid	Banxia	MMP7	3,4,5-trihydroxybenzoic acid (Banxia)	0.441608
MOL000513	3,4,5-trihydroxybenzoic acid	Banxia	SELE	3,4,5-trihydroxybenzoic acid (Banxia)	0.441608
MOL000513	3,4,5-trihydroxybenzoic acid	Banxia	SELL	3,4,5-trihydroxybenzoic acid (Banxia)	0.441608
MOL000513	3,4,5-trihydroxybenzoic acid	Banxia	SELP	3,4,5-trihydroxybenzoic acid (Banxia)	0.441608
MOL000513	3,4,5-trihydroxybenzoic acid	Banxia	SERPINE1	3,4,5-trihydroxybenzoic acid (Banxia)	0.441608
MOL000513	3,4,5-trihydroxybenzoic acid	Banxia	ST3GAL1	3,4,5-trihydroxybenzoic acid (Banxia)	0.441608
MOL000519	coniferin	Banxia	CCNA2	coniferin (Banxia)	0.176844
MOL000519	coniferin	Banxia	IGHG1	coniferin (Banxia)	0.176844
MOL000519	coniferin	Banxia	NCOA1	coniferin (Banxia)	0.176844
MOL000519	coniferin	Banxia	NCOA2	coniferin (Banxia)	0.176844
MOL000519	coniferin	Banxia	PIM1	coniferin (Banxia)	0.176844
MOL000579	hydroquinone	Banxia	CA1	hydroquinone (Banxia)	0.409387
MOL000579	hydroquinone	Banxia	CA12	hydroquinone (Banxia)	0.409387
MOL000579	hydroquinone	Banxia	CA14	hydroquinone (Banxia)	0.409387
MOL000579	hydroquinone	Banxia	CA2	hydroquinone (Banxia)	0.409387
MOL000579	hydroquinone	Banxia	CA3	hydroquinone (Banxia)	0.409387
MOL000579	hydroquinone	Banxia	CA4	hydroquinone (Banxia)	0.409387
MOL000579	hydroquinone	Banxia	CA5A	hydroquinone (Banxia)	0.409387
MOL000579	hydroquinone	Banxia	CA5B	hydroquinone (Banxia)	0.409387
MOL000579	hydroquinone	Banxia	CA6	hydroquinone (Banxia)	0.409387
MOL000579	hydroquinone	Banxia	CA7	hydroquinone (Banxia)	0.409387
MOL000579	hydroquinone	Banxia	CA9	hydroquinone (Banxia)	0.409387
MOL000579	hydroquinone	Banxia	PLG	hydroquinone (Banxia)	0.409387
MOL000675	oleic acid	Banxia	BCL2L11	oleic acid (Banxia)	0.143616
MOL000675	oleic acid	Banxia	CALM1	oleic acid (Banxia)	0.143616
MOL000675	oleic acid	Banxia	CYP19A1	oleic acid (Banxia)	0.143616
MOL000675	oleic acid	Banxia	DNPEP	oleic acid (Banxia)	0.143616
MOL000675	oleic acid	Banxia	ENPEP	oleic acid (Banxia)	0.143616
MOL000675	oleic acid	Banxia	F3	oleic acid (Banxia)	0.143616
MOL000675	oleic acid	Banxia	FAAH	oleic acid (Banxia)	0.143616
MOL000675	oleic acid	Banxia	FABP1	oleic acid (Banxia)	0.143616
MOL000675	oleic acid	Banxia	FABP4	oleic acid (Banxia)	0.143616
MOL000675	oleic acid	Banxia	FABP5	oleic acid (Banxia)	0.143616
MOL000675	oleic acid	Banxia	HMGCR	oleic acid (Banxia)	0.143616
MOL000675	oleic acid	Banxia	IGHG1	oleic acid (Banxia)	0.143616
MOL000675	oleic acid	Banxia	INS	oleic acid (Banxia)	0.143616
MOL000675	oleic acid	Banxia	KCNMA1	oleic acid (Banxia)	0.143616
MOL000675	oleic acid	Banxia	LPL	oleic acid (Banxia)	0.143616
MOL000675	oleic acid	Banxia	MPO	oleic acid (Banxia)	0.143616
MOL000675	oleic acid	Banxia	NCOA2	oleic acid (Banxia)	0.143616
MOL000675	oleic acid	Banxia	NTRK2	oleic acid (Banxia)	0.143616
MOL000675	oleic acid	Banxia	PAM	oleic acid (Banxia)	0.143616
MOL000675	oleic acid	Banxia	PLG	oleic acid (Banxia)	0.143616
MOL000675	oleic acid	Banxia	PON1	oleic acid (Banxia)	0.143616
MOL000675	oleic acid	Banxia	PRSS3	oleic acid (Banxia)	0.143616
MOL000675	oleic acid	Banxia	RHO	oleic acid (Banxia)	0.143616
MOL000675	oleic acid	Banxia	SOAT1	oleic acid (Banxia)	0.143616
MOL000675	oleic acid	Banxia	SOD1	oleic acid (Banxia)	0.143616
MOL000675	oleic acid	Banxia	TOP1	oleic acid (Banxia)	0.143616
MOL000697	MRY	Banxia	GATM	MRY (Banxia)	0.307549
MOL000697	MRY	Banxia	GLRA1	MRY (Banxia)	0.307549
MOL000697	MRY	Banxia	PLG	MRY (Banxia)	0.307549
MOL000697	MRY	Banxia	PRSS3	MRY (Banxia)	0.307549
MOL000748	HMF	Banxia	GABRA6	HMF (Banxia)	0.500394
MOL000748	HMF	Banxia	GRIA2	HMF (Banxia)	0.500394
MOL000748	HMF	Banxia	IGHG1	HMF (Banxia)	0.500394
MOL000860	stearic acid	Banxia	FABP4	stearic acid (Banxia)	0.121487
MOL000860	stearic acid	Banxia	IGHG1	stearic acid (Banxia)	0.121487
MOL000860	stearic acid	Banxia	NCOA2	stearic acid (Banxia)	0.121487
MOL000924	Mnk	Banxia	IGHG1	Mnk (Banxia)	0.150018
MOL000971	Ethylpalmitate	Banxia	NCOA2	Ethylpalmitate (Banxia)	0.147885
MOL001729	Crysophanol	Banxia	CALM1	Crysophanol (Banxia)	0.366402
MOL001729	Crysophanol	Banxia	ELANE	Crysophanol (Banxia)	0.366402
MOL001729	Crysophanol	Banxia	IGHG1	Crysophanol (Banxia)	0.366402
MOL001729	Crysophanol	Banxia	NCOA2	Crysophanol (Banxia)	0.366402
MOL001729	Crysophanol	Banxia	PKIA	Crysophanol (Banxia)	0.366402
MOL001739	zoomaric acid	Banxia	F3	zoomaric acid (Banxia)	0.159452
MOL001739	zoomaric acid	Banxia	FABP5	zoomaric acid (Banxia)	0.159452
MOL001739	zoomaric acid	Banxia	NCOA2	zoomaric acid (Banxia)	0.159452
MOL001744	uracil	Banxia	PLG	uracil (Banxia)	0.697087
MOL001757	GUN	Banxia	PNP	GUN (Banxia)	0.357922
MOL001831	HX	Banxia	PNP	HX (Banxia)	0.585018
MOL002670	Cavidine	Banxia	CALM1	Cavidine (Banxia)	0.102046
MOL002670	Cavidine	Banxia	PDE10A	Cavidine (Banxia)	0.102046
MOL002714	baicalein	Banxia	ABAT	baicalein (Banxia)	0.261305
MOL002714	baicalein	Banxia	ABCB1	baicalein (Banxia)	0.261305
MOL002714	baicalein	Banxia	AHR	baicalein (Banxia)	0.261305
MOL002714	baicalein	Banxia	ALOX12	baicalein (Banxia)	0.261305
MOL002714	baicalein	Banxia	ALOX15	baicalein (Banxia)	0.261305
MOL002714	baicalein	Banxia	ALOX15B	baicalein (Banxia)	0.261305
MOL002714	baicalein	Banxia	ALOX5	baicalein (Banxia)	0.261305
MOL002714	baicalein	Banxia	AURKB	baicalein (Banxia)	0.261305
MOL002714	baicalein	Banxia	CALM1	baicalein (Banxia)	0.261305
MOL002714	baicalein	Banxia	CDK1	baicalein (Banxia)	0.261305
MOL002714	baicalein	Banxia	CYCS	baicalein (Banxia)	0.261305
MOL002714	baicalein	Banxia	CYP1A1	baicalein (Banxia)	0.261305
MOL002714	baicalein	Banxia	CYP1B1	baicalein (Banxia)	0.261305
MOL002714	baicalein	Banxia	DAPK1	baicalein (Banxia)	0.261305
MOL002714	baicalein	Banxia	DPP4	baicalein (Banxia)	0.261305
MOL002714	baicalein	Banxia	EGLN1	baicalein (Banxia)	0.261305
MOL002714	baicalein	Banxia	FLT3	baicalein (Banxia)	0.261305
MOL002714	baicalein	Banxia	GAA	baicalein (Banxia)	0.261305
MOL002714	baicalein	Banxia	GLO1	baicalein (Banxia)	0.261305
MOL002714	baicalein	Banxia	GPR35	baicalein (Banxia)	0.261305
MOL002714	baicalein	Banxia	HSD17B3	baicalein (Banxia)	0.261305
MOL002714	baicalein	Banxia	HTR7	baicalein (Banxia)	0.261305
MOL002714	baicalein	Banxia	KDM4E	baicalein (Banxia)	0.261305
MOL002714	baicalein	Banxia	MPO	baicalein (Banxia)	0.261305
MOL002714	baicalein	Banxia	NCOA1	baicalein (Banxia)	0.261305
MOL002714	baicalein	Banxia	NCOA2	baicalein (Banxia)	0.261305
MOL002714	baicalein	Banxia	NEU2	baicalein (Banxia)	0.261305
MOL002714	baicalein	Banxia	PREP	baicalein (Banxia)	0.261305
MOL002714	baicalein	Banxia	PRSS1	baicalein (Banxia)	0.261305
MOL002714	baicalein	Banxia	SI	baicalein (Banxia)	0.261305
MOL002714	baicalein	Banxia	UGT1A1	baicalein (Banxia)	0.261305
MOL002714	baicalein	Banxia	XDH	baicalein (Banxia)	0.261305
MOL003969	L-Serin	Banxia	AGXT	L-Serin (Banxia)	0.629091
MOL003969	L-Serin	Banxia	AGXT2	L-Serin (Banxia)	0.629091
MOL003969	L-Serin	Banxia	AMD1	L-Serin (Banxia)	0.629091
MOL003969	L-Serin	Banxia	CTH	L-Serin (Banxia)	0.629091
MOL003969	L-Serin	Banxia	GATM	L-Serin (Banxia)	0.629091
MOL003969	L-Serin	Banxia	GIG18	L-Serin (Banxia)	0.629091
MOL003969	L-Serin	Banxia	GOT2	L-Serin (Banxia)	0.629091
MOL003969	L-Serin	Banxia	GPT	L-Serin (Banxia)	0.629091
MOL003969	L-Serin	Banxia	GRIN1	L-Serin (Banxia)	0.629091
MOL003969	L-Serin	Banxia	KYNU	L-Serin (Banxia)	0.629091
MOL003969	L-Serin	Banxia	ME2	L-Serin (Banxia)	0.629091
MOL003969	L-Serin	Banxia	ME3	L-Serin (Banxia)	0.629091
MOL003969	L-Serin	Banxia	NFS1	L-Serin (Banxia)	0.629091
MOL003969	L-Serin	Banxia	OAT	L-Serin (Banxia)	0.629091
MOL003969	L-Serin	Banxia	PKM	L-Serin (Banxia)	0.629091
MOL003969	L-Serin	Banxia	PLG	L-Serin (Banxia)	0.629091
MOL003969	L-Serin	Banxia	PRSS3	L-Serin (Banxia)	0.629091
MOL003969	L-Serin	Banxia	SARS	L-Serin (Banxia)	0.629091
MOL003969	L-Serin	Banxia	SDS	L-Serin (Banxia)	0.629091
MOL003969	L-Serin	Banxia	SLC36A1	L-Serin (Banxia)	0.629091
MOL003969	L-Serin	Banxia	TPI1	L-Serin (Banxia)	0.629091
MOL003971	Threonin	Banxia	AGXT	Threonin (Banxia)	0.555014
MOL003971	Threonin	Banxia	BCAT	Threonin (Banxia)	0.555014
MOL003971	Threonin	Banxia	CTH	Threonin (Banxia)	0.555014
MOL003971	Threonin	Banxia	GATM	Threonin (Banxia)	0.555014
MOL003971	Threonin	Banxia	GIG18	Threonin (Banxia)	0.555014
MOL003971	Threonin	Banxia	GOT2	Threonin (Banxia)	0.555014
MOL003971	Threonin	Banxia	GRIN1	Threonin (Banxia)	0.555014
MOL003971	Threonin	Banxia	ME2	Threonin (Banxia)	0.555014
MOL003971	Threonin	Banxia	PLG	Threonin (Banxia)	0.555014
MOL003971	Threonin	Banxia	TARS	Threonin (Banxia)	0.555014
MOL004739	DAL	Banxia	AARS	DAL (Banxia)	0.792588
MOL004739	DAL	Banxia	AGXT	DAL (Banxia)	0.792588
MOL004739	DAL	Banxia	AGXT2	DAL (Banxia)	0.792588
MOL004739	DAL	Banxia	ALDH5A1	DAL (Banxia)	0.792588
MOL004739	DAL	Banxia	AMD1	DAL (Banxia)	0.792588
MOL004739	DAL	Banxia	CTH	DAL (Banxia)	0.792588
MOL004739	DAL	Banxia	F13A1	DAL (Banxia)	0.792588
MOL004739	DAL	Banxia	GALE	DAL (Banxia)	0.792588
MOL004739	DAL	Banxia	GATM	DAL (Banxia)	0.792588
MOL004739	DAL	Banxia	GCAT	DAL (Banxia)	0.792588
MOL004739	DAL	Banxia	GIG18	DAL (Banxia)	0.792588
MOL004739	DAL	Banxia	GOT2	DAL (Banxia)	0.792588
MOL004739	DAL	Banxia	GPT	DAL (Banxia)	0.792588
MOL004739	DAL	Banxia	GRIN1	DAL (Banxia)	0.792588
MOL004739	DAL	Banxia	LDHA	DAL (Banxia)	0.792588
MOL004739	DAL	Banxia	LDHB	DAL (Banxia)	0.792588
MOL004739	DAL	Banxia	ME1	DAL (Banxia)	0.792588
MOL004739	DAL	Banxia	ME2	DAL (Banxia)	0.792588
MOL004739	DAL	Banxia	ME3	DAL (Banxia)	0.792588
MOL004739	DAL	Banxia	NFS1	DAL (Banxia)	0.792588
MOL004739	DAL	Banxia	OAT	DAL (Banxia)	0.792588
MOL004739	DAL	Banxia	PHYKPL	DAL (Banxia)	0.792588
MOL004739	DAL	Banxia	PKLR	DAL (Banxia)	0.792588
MOL004739	DAL	Banxia	PKM	DAL (Banxia)	0.792588
MOL004739	DAL	Banxia	PLG	DAL (Banxia)	0.792588
MOL004739	DAL	Banxia	PRSS3	DAL (Banxia)	0.792588
MOL004739	DAL	Banxia	SHMT2	DAL (Banxia)	0.792588
MOL004739	DAL	Banxia	SLC36A1	DAL (Banxia)	0.792588
MOL004739	DAL	Banxia	TPI1	DAL (Banxia)	0.792588
MOL005030	gondoic acid	Banxia	NCOA2	gondoic acid (Banxia)	0.130641
MOL005125	ANN	Banxia	PLA2G2E	ANN (Banxia)	0.493773
MOL005448	Leucinum	Banxia	ALPI	Leucinum (Banxia)	0.584192
MOL005448	Leucinum	Banxia	ALPL	Leucinum (Banxia)	0.584192
MOL005448	Leucinum	Banxia	PLAA	Leucinum (Banxia)	0.584192
MOL005448	Leucinum	Banxia	PLG	Leucinum (Banxia)	0.584192
MOL006240	THM	Banxia	NCOA2	THM (Banxia)	0.353566
MOL006240	THM	Banxia	PRSS1	THM (Banxia)	0.353566
MOL006844	Norharman	Banxia	CHUK	Norharman (Banxia)	0.321599
MOL006844	Norharman	Banxia	IDO1	Norharman (Banxia)	0.321599
MOL006844	Norharman	Banxia	MAOB	Norharman (Banxia)	0.321599
MOL006844	Norharman	Banxia	NCOA2	Norharman (Banxia)	0.321599
MOL006844	Norharman	Banxia	ROCK2	Norharman (Banxia)	0.321599
MOL006931	isolariciresino	Banxia	CALM1	isolariciresino (Banxia)	0.104211
MOL006931	isolariciresino	Banxia	CCNA2	isolariciresino (Banxia)	0.104211
MOL006931	isolariciresino	Banxia	NCOA2	isolariciresino (Banxia)	0.104211
MOL006931	isolariciresino	Banxia	PIM1	isolariciresino (Banxia)	0.104211
MOL006936	10,13-eicosadienoic	Banxia	NCOA2	10,13-eicosadienoic (Banxia)	0.13637
MOL006940	D-2-Aminobutyrate	Banxia	AGXT	D-2-Aminobutyrate (Banxia)	0.743119
MOL006940	D-2-Aminobutyrate	Banxia	CTH	D-2-Aminobutyrate (Banxia)	0.743119
MOL006940	D-2-Aminobutyrate	Banxia	GATM	D-2-Aminobutyrate (Banxia)	0.743119
MOL006940	D-2-Aminobutyrate	Banxia	GIG18	D-2-Aminobutyrate (Banxia)	0.743119
MOL006940	D-2-Aminobutyrate	Banxia	GPT	D-2-Aminobutyrate (Banxia)	0.743119
MOL006940	D-2-Aminobutyrate	Banxia	ME2	D-2-Aminobutyrate (Banxia)	0.743119
MOL006940	D-2-Aminobutyrate	Banxia	ME3	D-2-Aminobutyrate (Banxia)	0.743119
MOL006940	D-2-Aminobutyrate	Banxia	NFS1	D-2-Aminobutyrate (Banxia)	0.743119
MOL006940	D-2-Aminobutyrate	Banxia	PLG	D-2-Aminobutyrate (Banxia)	0.743119
MOL006940	D-2-Aminobutyrate	Banxia	PRSS3	D-2-Aminobutyrate (Banxia)	0.743119
MOL006940	D-2-Aminobutyrate	Banxia	TPI1	D-2-Aminobutyrate (Banxia)	0.743119
MOL006944	8-Octadecenoic acid	Banxia	IGHG1	8-Octadecenoic acid (Banxia)	0.143616
MOL006944	8-Octadecenoic acid	Banxia	NCOA2	8-Octadecenoic acid (Banxia)	0.143616
MOL006949	6-Deoxy-gulose	Banxia	PLG	6-Deoxy-gulose (Banxia)	0.311187
MOL006954	BVE	Banxia	PRSS3	BVE (Banxia)	0.765086
MOL006957	(3S,6S)-3-(benzyl)-6-(4-hydroxybenzyl)piperazine-2,5-quinone	Banxia	CALM1	(3S,6S)-3-(benzyl)-6-(4-hydroxybenzyl)piperazine-2,5-quinone (Banxia)	0.14525
MOL006962	2Z-hexadecenoic acid	Banxia	NCOA2	2Z-hexadecenoic acid (Banxia)	0.135846
MOL006962	2Z-hexadecenoic acid	Banxia	RHO	2Z-hexadecenoic acid (Banxia)	0.135846
MOL006963	Ethyl linolelaidate	Banxia	NCOA2	Ethyl linolelaidate (Banxia)	0.150995
MOL006967	beta-D-Ribofuranoside, xanthine-9	Banxia	PNP	beta-D-Ribofuranoside, xanthine-9 (Banxia)	0.0687163
MOL000666	hexanal	Changshan	F3	hexanal (Changshan)	0.630047
MOL000666	hexanal	Changshan	MAPK10	hexanal (Changshan)	0.630047
MOL000708	Benzaldehyde	Changshan	CYP2A6	Benzaldehyde (Changshan)	0.637161
MOL000708	Benzaldehyde	Changshan	CYP2A6	Benzaldehyde (Changshan)	0.637161
MOL000708	Benzaldehyde	Changshan	PRSS3	Benzaldehyde (Changshan)	0.637161
MOL000708	Benzaldehyde	Changshan	PRSS3	Benzaldehyde (Changshan)	0.637161
MOL000708	Benzaldehyde	Changshan	TYR	Benzaldehyde (Changshan)	0.637161
MOL000708	Benzaldehyde	Changshan	TYR	Benzaldehyde (Changshan)	0.637161
MOL000714	Hyacinthin	Changshan	PLG	Hyacinthin (Changshan)	0.662744
MOL000714	Hyacinthin	Changshan	PRSS3	Hyacinthin (Changshan)	0.662744
MOL002851	ZINC05224268	Changshan	GABRA6	ZINC05224268 (Changshan)	0.320463
MOL003536	T-Cadinol	Changshan	GABRA6	T-Cadinol (Changshan)	0.229726
MOL003547	Azaron	Changshan	CYP2D6	Azaron (Changshan)	0.360744
MOL003547	Azaron	Changshan	HMGCR	Azaron (Changshan)	0.360744
MOL003547	Azaron	Changshan	PKIA	Azaron (Changshan)	0.360744
MOL005999	crotonaldehyde	Changshan	IFNG	crotonaldehyde (Changshan)	1.00748
MOL005999	crotonaldehyde	Changshan	IL2	crotonaldehyde (Changshan)	1.00748
MOL005999	crotonaldehyde	Changshan	PRSS3	crotonaldehyde (Changshan)	1.00748
MOL005999	crotonaldehyde	Changshan	TRPA1	crotonaldehyde (Changshan)	1.00748
MOL006287	α-muurolene	Changshan	NCOA2	α-muurolene (Changshan)	0.382353
MOL008166	(E)-Pent-2-en-1-ol	Changshan	PRSS3	(E)-Pent-2-en-1-ol (Changshan)	0.837296
MOL008168	3-hexanone,2,4-dimethyl-	Changshan	GABRA6	3-hexanone,2,4-dimethyl- (Changshan)	0.574222
MOL008170	3-methyl-3,4-divinyl-1-cyclohexene	Changshan	GABRA6	3-methyl-3,4-divinyl-1-cyclohexene (Changshan)	0.537137
MOL008173	daucosterol_qt	Changshan	NCOA2	daucosterol_qt (Changshan)	0.134059
MOL008175	Ethyl 3-butenoate	Changshan	PRSS3	Ethyl 3-butenoate (Changshan)	0.566036
MOL008177	4,8-dimethoxy-1-methyl-3-(3-methyl-2-oxobut-3-enyl)quinolin-2-one	Changshan	CALM1	4,8-dimethoxy-1-methyl-3-(3-methyl-2-oxobut-3-enyl)quinolin-2-one (Changshan)	0.27423
MOL008177	4,8-dimethoxy-1-methyl-3-(3-methyl-2-oxobut-3-enyl)quinolin-2-one	Changshan	NCOA2	4,8-dimethoxy-1-methyl-3-(3-methyl-2-oxobut-3-enyl)quinolin-2-one (Changshan)	0.27423
MOL008178	3-(2-keto-3-methyl-but-3-enyl)-4,8-dimethoxy-carbostyril	Changshan	NCOA2	3-(2-keto-3-methyl-but-3-enyl)-4,8-dimethoxy-carbostyril (Changshan)	0.251011
MOL008186	Isobutyryl chloride	Changshan	GATM	Isobutyryl chloride (Changshan)	0.606366
MOL008192	NEOPENTANE	Changshan	PLG	NEOPENTANE (Changshan)	1.20789
MOL008192	NEOPENTANE	Changshan	PRSS3	NEOPENTANE (Changshan)	1.20789
MOL008192	NEOPENTANE	Changshan	TPI1	NEOPENTANE (Changshan)	1.20789
MOL008193	4,8-dimethoxy-1-methyl-3-(3-methyl-2-oxobutyl)quinolin-2-one	Changshan	CALM1	4,8-dimethoxy-1-methyl-3-(3-methyl-2-oxobutyl)quinolin-2-one (Changshan)	0.242695
MOL008193	4,8-dimethoxy-1-methyl-3-(3-methyl-2-oxobutyl)quinolin-2-one	Changshan	KCNMA1	4,8-dimethoxy-1-methyl-3-(3-methyl-2-oxobutyl)quinolin-2-one (Changshan)	0.242695
MOL008198	Vinyl methacrylate	Changshan	PLG	Vinyl methacrylate (Changshan)	0.50924
fuling_002	Adenine	Fuling	CDK1	Adenine (Fuling)	0.500395
fuling_002	Adenine	Fuling	HSP90AB1	Adenine (Fuling)	0.500395
fuling_002	Adenine	Fuling	XDH	Adenine (Fuling)	0.500395
fuling_004	Caprylic acid	Fuling	ACOT1	Caprylic acid (Fuling)	0.239651
fuling_004	Caprylic acid	Fuling	PLA2G1B	Caprylic acid (Fuling)	0.239651
fuling_004	Caprylic acid	Fuling	PRSS3	Caprylic acid (Fuling)	0.239651
fuling_005	Choline	Fuling	ACHE	Choline (Fuling)	0.302891
fuling_005	Choline	Fuling	CHRNA4	Choline (Fuling)	0.302891
fuling_012	Ergosterol	Fuling	DHCR7	Ergosterol (Fuling)	0.121204
fuling_012	Ergosterol	Fuling	NCOA2	Ergosterol (Fuling)	0.121204
fuling_012	Ergosterol	Fuling	NR3C1	Ergosterol (Fuling)	0.121204
fuling_013	Hexadecanoic acid	Fuling	ADH1B	Hexadecanoic acid (Fuling)	0.134778
fuling_013	Hexadecanoic acid	Fuling	BCL2	Hexadecanoic acid (Fuling)	0.134778
fuling_013	Hexadecanoic acid	Fuling	COL1A1	Hexadecanoic acid (Fuling)	0.134778
fuling_013	Hexadecanoic acid	Fuling	CTSD	Hexadecanoic acid (Fuling)	0.134778
fuling_013	Hexadecanoic acid	Fuling	FABP2	Hexadecanoic acid (Fuling)	0.134778
fuling_013	Hexadecanoic acid	Fuling	FABP3	Hexadecanoic acid (Fuling)	0.134778
fuling_013	Hexadecanoic acid	Fuling	FABP4	Hexadecanoic acid (Fuling)	0.134778
fuling_013	Hexadecanoic acid	Fuling	FABP5	Hexadecanoic acid (Fuling)	0.134778
fuling_013	Hexadecanoic acid	Fuling	IGHG1	Hexadecanoic acid (Fuling)	0.134778
fuling_013	Hexadecanoic acid	Fuling	NCOA2	Hexadecanoic acid (Fuling)	0.134778
fuling_013	Hexadecanoic acid	Fuling	PCYT1A	Hexadecanoic acid (Fuling)	0.134778
fuling_013	Hexadecanoic acid	Fuling	RHO	Hexadecanoic acid (Fuling)	0.134778
fuling_013	Hexadecanoic acid	Fuling	TLR2	Hexadecanoic acid (Fuling)	0.134778
fuling_018	Laurie acid	Fuling	BCHE	Laurie acid (Fuling)	0.172528
fuling_018	Laurie acid	Fuling	CD80	Laurie acid (Fuling)	0.172528
fuling_018	Laurie acid	Fuling	CD86	Laurie acid (Fuling)	0.172528
fuling_018	Laurie acid	Fuling	FFAR1	Laurie acid (Fuling)	0.172528
fuling_018	Laurie acid	Fuling	IGHG1	Laurie acid (Fuling)	0.172528
fuling_018	Laurie acid	Fuling	PLA2G1B	Laurie acid (Fuling)	0.172528
fuling_033	Undecanoic acid	Fuling	PLA2G1B	Undecanoic acid (Fuling)	0.185518
MOL000273	(2R)-2-[(3S,5R,10S,13R,14R,16R,17R)-3,16-dihydroxy-4,4,10,13,14-pentamethyl-2,3,5,6,12,15,16,17-octahydro-1H-cyclopenta[a]phenanthren-17-yl]-6-methylhept-5-enoic acid	Fuling	NCOA2	(2R)-2-[(3S,5R,10S,13R,14R,16R,17R)-3,16-dihydroxy-4,4,10,13,14-pentamethyl-2,3,5,6,12,15,16,17-octahydro-1H-cyclopenta[a]phenanthren-17-yl]-6-methylhept-5-enoic acid (Fuling)	0.0574492
MOL000273	(2R)-2-[(3S,5R,10S,13R,14R,16R,17R)-3,16-dihydroxy-4,4,10,13,14-pentamethyl-2,3,5,6,12,15,16,17-octahydro-1H-cyclopenta[a]phenanthren-17-yl]-6-methylhept-5-enoic acid	Fuling	NR3C2	(2R)-2-[(3S,5R,10S,13R,14R,16R,17R)-3,16-dihydroxy-4,4,10,13,14-pentamethyl-2,3,5,6,12,15,16,17-octahydro-1H-cyclopenta[a]phenanthren-17-yl]-6-methylhept-5-enoic acid (Fuling)	0.0574492
MOL000275	trametenolic acid	Fuling	NR3C2	trametenolic acid (Fuling)	0.0921169
MOL000278	Beta-Glucan	Fuling	AMY2A	Beta-Glucan (Fuling)	0.0523541
MOL000279	Cerevisterol	Fuling	NR3C2	Cerevisterol (Fuling)	0.129092
MOL000283	Ergosterol peroxide	Fuling	NCOA2	Ergosterol peroxide (Fuling)	0.108163
MOL000288	pachyman	Fuling	AMY2A	pachyman (Fuling)	0.0450336
MOL000295	alexandrin	Fuling	NCOA1	alexandrin (Fuling)	0.0520907
MOL000295	alexandrin	Fuling	NCOA2	alexandrin (Fuling)	0.0520907
MOL000295	alexandrin	Fuling	PRSS3	alexandrin (Fuling)	0.0520907
MOL000295	alexandrin	Fuling	PYGM	alexandrin (Fuling)	0.0520907
MOL000296	hederagenin	Fuling	GABRA6	hederagenin (Fuling)	0.134059
MOL000296	hederagenin	Fuling	GRIA2	hederagenin (Fuling)	0.134059
MOL000296	hederagenin	Fuling	IGHG1	hederagenin (Fuling)	0.134059
MOL000296	hederagenin	Fuling	NCOA2	hederagenin (Fuling)	0.134059
MOL000304	Ethyl glucoside	Fuling	GRIA2	Ethyl glucoside (Fuling)	0.173212
MOL000304	Ethyl glucoside	Fuling	IGHG1	Ethyl glucoside (Fuling)	0.173212
gancao_001	3-O-Acetyl-glycyrrhetinic acid	Gancao	CES1	3-O-Acetyl-glycyrrhetinic acid (Gancao)	0.0724325
gancao_001	3-O-Acetyl-glycyrrhetinic acid	Gancao	CES2	3-O-Acetyl-glycyrrhetinic acid (Gancao)	0.0724325
gancao_001	3-O-Acetyl-glycyrrhetinic acid	Gancao	HSD11B1	3-O-Acetyl-glycyrrhetinic acid (Gancao)	0.0724325
gancao_001	3-O-Acetyl-glycyrrhetinic acid	Gancao	HSD11B2	3-O-Acetyl-glycyrrhetinic acid (Gancao)	0.0724325
gancao_001	3-O-Acetyl-glycyrrhetinic acid	Gancao	HSD17B1	3-O-Acetyl-glycyrrhetinic acid (Gancao)	0.0724325
gancao_001	3-O-Acetyl-glycyrrhetinic acid	Gancao	HSD17B2	3-O-Acetyl-glycyrrhetinic acid (Gancao)	0.0724325
gancao_003	Corylifolinin	Gancao	PTPN1	Corylifolinin (Gancao)	0.0649781
gancao_008	3,3'-Dimethylquercetin	Gancao	CALM1	3,3'-Dimethylquercetin (Gancao)	0.0942104
gancao_008	3,3'-Dimethylquercetin	Gancao	NCOA2	3,3'-Dimethylquercetin (Gancao)	0.0942104
gancao_008	3,3'-Dimethylquercetin	Gancao	PRSS1	3,3'-Dimethylquercetin (Gancao)	0.0942104
gancao_010	Formononetin	Gancao	ATP5B	Formononetin (Gancao)	0.149646
gancao_010	Formononetin	Gancao	CALM1	Formononetin (Gancao)	0.149646
gancao_010	Formononetin	Gancao	CCNA2	Formononetin (Gancao)	0.149646
gancao_010	Formononetin	Gancao	ESR2	Formononetin (Gancao)	0.149646
gancao_010	Formononetin	Gancao	IL2	Formononetin (Gancao)	0.149646
gancao_010	Formononetin	Gancao	MT-ND6	Formononetin (Gancao)	0.149646
gancao_010	Formononetin	Gancao	PIM1	Formononetin (Gancao)	0.149646
gancao_010	Formononetin	Gancao	PKIA	Formononetin (Gancao)	0.149646
gancao_010	Formononetin	Gancao	PRSS1	Formononetin (Gancao)	0.149646
gancao_012	Gancaonin A	Gancao	CALM1	Gancaonin A (Gancao)	0.111073
gancao_012	Gancaonin A	Gancao	CCNA2	Gancaonin A (Gancao)	0.111073
gancao_012	Gancaonin A	Gancao	NCOA2	Gancaonin A (Gancao)	0.111073
gancao_012	Gancaonin A	Gancao	PIM1	Gancaonin A (Gancao)	0.111073
gancao_012	Gancaonin A	Gancao	PRSS1	Gancaonin A (Gancao)	0.111073
gancao_013	Gancaonin B	Gancao	CALM1	Gancaonin B (Gancao)	0.133503
gancao_013	Gancaonin B	Gancao	CCNA2	Gancaonin B (Gancao)	0.133503
gancao_013	Gancaonin B	Gancao	NCOA2	Gancaonin B (Gancao)	0.133503
gancao_013	Gancaonin B	Gancao	PIM1	Gancaonin B (Gancao)	0.133503
gancao_013	Gancaonin B	Gancao	PRSS1	Gancaonin B (Gancao)	0.133503
gancao_025	Glycycoumarin	Gancao	PTPN1	Glycycoumarin (Gancao)	0.111703
gancao_026	Glycyrin	Gancao	CALM1	Glycyrin (Gancao)	0.107606
gancao_026	Glycyrin	Gancao	NCOA2	Glycyrin (Gancao)	0.107606
gancao_026	Glycyrin	Gancao	PIM1	Glycyrin (Gancao)	0.107606
gancao_026	Glycyrin	Gancao	PRSS1	Glycyrin (Gancao)	0.107606
gancao_027	Glycyrol	Gancao	CCNA2	Glycyrol (Gancao)	0.0986259
gancao_027	Glycyrol	Gancao	PIM1	Glycyrol (Gancao)	0.0986259
gancao_028	Glycyrrhetinic acid	Gancao	AKR1B1	Glycyrrhetinic acid (Gancao)	83.1407
gancao_028	Glycyrrhetinic acid	Gancao	AKR1B10	Glycyrrhetinic acid (Gancao)	83.1407
gancao_028	Glycyrrhetinic acid	Gancao	AKR1C4	Glycyrrhetinic acid (Gancao)	83.1407
gancao_028	Glycyrrhetinic acid	Gancao	CASP3	Glycyrrhetinic acid (Gancao)	83.1407
gancao_028	Glycyrrhetinic acid	Gancao	CASP7	Glycyrrhetinic acid (Gancao)	83.1407
gancao_028	Glycyrrhetinic acid	Gancao	CES1	Glycyrrhetinic acid (Gancao)	83.1407
gancao_028	Glycyrrhetinic acid	Gancao	CES2	Glycyrrhetinic acid (Gancao)	83.1407
gancao_028	Glycyrrhetinic acid	Gancao	CYP19A1	Glycyrrhetinic acid (Gancao)	83.1407
gancao_028	Glycyrrhetinic acid	Gancao	CYP2C19	Glycyrrhetinic acid (Gancao)	83.1407
gancao_028	Glycyrrhetinic acid	Gancao	CYP2C9	Glycyrrhetinic acid (Gancao)	83.1407
gancao_028	Glycyrrhetinic acid	Gancao	CYP2D6	Glycyrrhetinic acid (Gancao)	83.1407
gancao_028	Glycyrrhetinic acid	Gancao	CYP3A4	Glycyrrhetinic acid (Gancao)	83.1407
gancao_028	Glycyrrhetinic acid	Gancao	ESR1	Glycyrrhetinic acid (Gancao)	83.1407
gancao_028	Glycyrrhetinic acid	Gancao	ESR2	Glycyrrhetinic acid (Gancao)	83.1407
gancao_028	Glycyrrhetinic acid	Gancao	ESRRA	Glycyrrhetinic acid (Gancao)	83.1407
gancao_028	Glycyrrhetinic acid	Gancao	GJA1	Glycyrrhetinic acid (Gancao)	83.1407
gancao_028	Glycyrrhetinic acid	Gancao	GLI3	Glycyrrhetinic acid (Gancao)	83.1407
gancao_028	Glycyrrhetinic acid	Gancao	GMNN	Glycyrrhetinic acid (Gancao)	83.1407
gancao_028	Glycyrrhetinic acid	Gancao	GNAO1	Glycyrrhetinic acid (Gancao)	83.1407
gancao_028	Glycyrrhetinic acid	Gancao	HIF1A	Glycyrrhetinic acid (Gancao)	83.1407
gancao_028	Glycyrrhetinic acid	Gancao	HSD11B1	Glycyrrhetinic acid (Gancao)	83.1407
gancao_028	Glycyrrhetinic acid	Gancao	HSD11B2	Glycyrrhetinic acid (Gancao)	83.1407
gancao_028	Glycyrrhetinic acid	Gancao	HSD17B1	Glycyrrhetinic acid (Gancao)	83.1407
gancao_028	Glycyrrhetinic acid	Gancao	HSD17B2	Glycyrrhetinic acid (Gancao)	83.1407
gancao_028	Glycyrrhetinic acid	Gancao	HSPB1	Glycyrrhetinic acid (Gancao)	83.1407
gancao_028	Glycyrrhetinic acid	Gancao	JUN	Glycyrrhetinic acid (Gancao)	83.1407
gancao_028	Glycyrrhetinic acid	Gancao	LMNA	Glycyrrhetinic acid (Gancao)	83.1407
gancao_028	Glycyrrhetinic acid	Gancao	MAPT	Glycyrrhetinic acid (Gancao)	83.1407
gancao_028	Glycyrrhetinic acid	Gancao	NFE2L2	Glycyrrhetinic acid (Gancao)	83.1407
gancao_028	Glycyrrhetinic acid	Gancao	NR1H4	Glycyrrhetinic acid (Gancao)	83.1407
gancao_028	Glycyrrhetinic acid	Gancao	NR3C1	Glycyrrhetinic acid (Gancao)	83.1407
gancao_028	Glycyrrhetinic acid	Gancao	PGR	Glycyrrhetinic acid (Gancao)	83.1407
gancao_028	Glycyrrhetinic acid	Gancao	PLK1	Glycyrrhetinic acid (Gancao)	83.1407
gancao_028	Glycyrrhetinic acid	Gancao	POLK	Glycyrrhetinic acid (Gancao)	83.1407
gancao_028	Glycyrrhetinic acid	Gancao	PPARD	Glycyrrhetinic acid (Gancao)	83.1407
gancao_028	Glycyrrhetinic acid	Gancao	PPARG	Glycyrrhetinic acid (Gancao)	83.1407
gancao_028	Glycyrrhetinic acid	Gancao	PRKCA	Glycyrrhetinic acid (Gancao)	83.1407
gancao_028	Glycyrrhetinic acid	Gancao	PRKCB	Glycyrrhetinic acid (Gancao)	83.1407
gancao_028	Glycyrrhetinic acid	Gancao	PRKCD	Glycyrrhetinic acid (Gancao)	83.1407
gancao_028	Glycyrrhetinic acid	Gancao	PRKCH	Glycyrrhetinic acid (Gancao)	83.1407
gancao_028	Glycyrrhetinic acid	Gancao	PTPN1	Glycyrrhetinic acid (Gancao)	83.1407
gancao_028	Glycyrrhetinic acid	Gancao	PTPN11	Glycyrrhetinic acid (Gancao)	83.1407
gancao_028	Glycyrrhetinic acid	Gancao	PTPN2	Glycyrrhetinic acid (Gancao)	83.1407
gancao_028	Glycyrrhetinic acid	Gancao	PTPN6	Glycyrrhetinic acid (Gancao)	83.1407
gancao_028	Glycyrrhetinic acid	Gancao	PTPN7	Glycyrrhetinic acid (Gancao)	83.1407
gancao_028	Glycyrrhetinic acid	Gancao	RGS19	Glycyrrhetinic acid (Gancao)	83.1407
gancao_028	Glycyrrhetinic acid	Gancao	RXRA	Glycyrrhetinic acid (Gancao)	83.1407
gancao_028	Glycyrrhetinic acid	Gancao	SLCO1B1	Glycyrrhetinic acid (Gancao)	83.1407
gancao_028	Glycyrrhetinic acid	Gancao	SLCO1B3	Glycyrrhetinic acid (Gancao)	83.1407
gancao_028	Glycyrrhetinic acid	Gancao	SMAD2	Glycyrrhetinic acid (Gancao)	83.1407
gancao_028	Glycyrrhetinic acid	Gancao	SMAD3	Glycyrrhetinic acid (Gancao)	83.1407
gancao_028	Glycyrrhetinic acid	Gancao	TDP1	Glycyrrhetinic acid (Gancao)	83.1407
gancao_028	Glycyrrhetinic acid	Gancao	TP53	Glycyrrhetinic acid (Gancao)	83.1407
gancao_028	Glycyrrhetinic acid	Gancao	TRHR	Glycyrrhetinic acid (Gancao)	83.1407
gancao_028	Glycyrrhetinic acid	Gancao	TSHR	Glycyrrhetinic acid (Gancao)	83.1407
gancao_028	Glycyrrhetinic acid	Gancao	VDR	Glycyrrhetinic acid (Gancao)	83.1407
gancao_031	Glycyrrhisotlavone	Gancao	PTPN1	Glycyrrhisotlavone (Gancao)	0.0962984
gancao_032	Glycyrrhiza-tlavonol A	Gancao	CALM1	Glycyrrhiza-tlavonol A (Gancao)	0.0623361
gancao_032	Glycyrrhiza-tlavonol A	Gancao	CCNA2	Glycyrrhiza-tlavonol A (Gancao)	0.0623361
gancao_032	Glycyrrhiza-tlavonol A	Gancao	PIM1	Glycyrrhiza-tlavonol A (Gancao)	0.0623361
gancao_032	Glycyrrhiza-tlavonol A	Gancao	PRSS1	Glycyrrhiza-tlavonol A (Gancao)	0.0623361
gancao_033	Glycyrrhizic acid	Gancao	AR	Glycyrrhizic acid (Gancao)	1496.61
gancao_033	Glycyrrhizic acid	Gancao	GPT2	Glycyrrhizic acid (Gancao)	1496.61
gancao_033	Glycyrrhizic acid	Gancao	HMOX1	Glycyrrhizic acid (Gancao)	1496.61
gancao_033	Glycyrrhizic acid	Gancao	HSD11B1	Glycyrrhizic acid (Gancao)	1496.61
gancao_033	Glycyrrhizic acid	Gancao	HSD11B2	Glycyrrhizic acid (Gancao)	1496.61
gancao_033	Glycyrrhizic acid	Gancao	MPO	Glycyrrhizic acid (Gancao)	1496.61
gancao_033	Glycyrrhizic acid	Gancao	NR3C1	Glycyrrhizic acid (Gancao)	1496.61
gancao_033	Glycyrrhizic acid	Gancao	SLCO1B1	Glycyrrhizic acid (Gancao)	1496.61
gancao_033	Glycyrrhizic acid	Gancao	SLCO1B3	Glycyrrhizic acid (Gancao)	1496.61
gancao_036	Glyzaglabrin	Gancao	CCNA2	Glyzaglabrin (Gancao)	0.121151
gancao_036	Glyzaglabrin	Gancao	PIM1	Glyzaglabrin (Gancao)	0.121151
gancao_036	Glyzaglabrin	Gancao	PRSS1	Glyzaglabrin (Gancao)	0.121151
gancao_040	Isoglycyrol	Gancao	PIM1	Isoglycyrol (Gancao)	0.0794492
gancao_041	Isolicoflavonol	Gancao	CALM1	Isolicoflavonol (Gancao)	0.0764716
gancao_041	Isolicoflavonol	Gancao	CCNA2	Isolicoflavonol (Gancao)	0.0764716
gancao_041	Isolicoflavonol	Gancao	CYP19A1	Isolicoflavonol (Gancao)	0.0764716
gancao_041	Isolicoflavonol	Gancao	NCOA2	Isolicoflavonol (Gancao)	0.0764716
gancao_041	Isolicoflavonol	Gancao	PIM1	Isolicoflavonol (Gancao)	0.0764716
gancao_041	Isolicoflavonol	Gancao	PRSS1	Isolicoflavonol (Gancao)	0.0764716
gancao_042	Isoliquiritigenin	Gancao	AKR1B1	Isoliquiritigenin (Gancao)	27.5288
gancao_042	Isoliquiritigenin	Gancao	BACE1	Isoliquiritigenin (Gancao)	27.5288
gancao_042	Isoliquiritigenin	Gancao	BCL2L11	Isoliquiritigenin (Gancao)	27.5288
gancao_042	Isoliquiritigenin	Gancao	CCNA2	Isoliquiritigenin (Gancao)	27.5288
gancao_042	Isoliquiritigenin	Gancao	CHRNA7	Isoliquiritigenin (Gancao)	27.5288
gancao_042	Isoliquiritigenin	Gancao	JAK2	Isoliquiritigenin (Gancao)	27.5288
gancao_042	Isoliquiritigenin	Gancao	NCOA2	Isoliquiritigenin (Gancao)	27.5288
gancao_042	Isoliquiritigenin	Gancao	PIM1	Isoliquiritigenin (Gancao)	27.5288
gancao_042	Isoliquiritigenin	Gancao	PKIA	Isoliquiritigenin (Gancao)	27.5288
gancao_042	Isoliquiritigenin	Gancao	PTPN1	Isoliquiritigenin (Gancao)	27.5288
gancao_042	Isoliquiritigenin	Gancao	SCN5A	Isoliquiritigenin (Gancao)	27.5288
gancao_042	Isoliquiritigenin	Gancao	SELE	Isoliquiritigenin (Gancao)	27.5288
gancao_042	Isoliquiritigenin	Gancao	SMARCA2	Isoliquiritigenin (Gancao)	27.5288
gancao_042	Isoliquiritigenin	Gancao	VCAM1	Isoliquiritigenin (Gancao)	27.5288
gancao_043	Isoliquiritin	Gancao	AKR1B1	Isoliquiritin (Gancao)	107.469
gancao_043	Isoliquiritin	Gancao	DPP4	Isoliquiritin (Gancao)	107.469
gancao_043	Isoliquiritin	Gancao	PTPN1	Isoliquiritin (Gancao)	107.469
gancao_045	Isoquercitrin	Gancao	ACHE	Isoquercitrin (Gancao)	0.0410608
gancao_045	Isoquercitrin	Gancao	AURKB	Isoquercitrin (Gancao)	0.0410608
gancao_045	Isoquercitrin	Gancao	PTPN1	Isoquercitrin (Gancao)	0.0410608
gancao_046	Isotrifoliol	Gancao	CCNA2	Isotrifoliol (Gancao)	0.121151
gancao_046	Isotrifoliol	Gancao	PIM1	Isotrifoliol (Gancao)	0.121151
gancao_051	Licocoumarone	Gancao	CCNA2	Licocoumarone (Gancao)	0.106158
gancao_051	Licocoumarone	Gancao	PTPN1	Licocoumarone (Gancao)	0.106158
gancao_053	Licoisoflavone	Gancao	CALM1	Licoisoflavone (Gancao)	0.0849773
gancao_053	Licoisoflavone	Gancao	CCNA2	Licoisoflavone (Gancao)	0.0849773
gancao_053	Licoisoflavone	Gancao	NCOA2	Licoisoflavone (Gancao)	0.0849773
gancao_053	Licoisoflavone	Gancao	PIM1	Licoisoflavone (Gancao)	0.0849773
gancao_053	Licoisoflavone	Gancao	PRSS1	Licoisoflavone (Gancao)	0.0849773
gancao_055	Licopyranocoumarin	Gancao	CALM1	Licopyranocoumarin (Gancao)	0.0678843
gancao_055	Licopyranocoumarin	Gancao	CCNA2	Licopyranocoumarin (Gancao)	0.0678843
gancao_055	Licopyranocoumarin	Gancao	PIM1	Licopyranocoumarin (Gancao)	0.0678843
gancao_055	Licopyranocoumarin	Gancao	PRSS1	Licopyranocoumarin (Gancao)	0.0678843
gancao_066	Licoricidin	Gancao	ACHE	Licoricidin (Gancao)	0.0732969
gancao_067	Licoricone	Gancao	CALM1	Licoricone (Gancao)	0.128606
gancao_067	Licoricone	Gancao	NCOA2	Licoricone (Gancao)	0.128606
gancao_067	Licoricone	Gancao	PIM1	Licoricone (Gancao)	0.128606
gancao_067	Licoricone	Gancao	PRSS1	Licoricone (Gancao)	0.128606
gancao_069	Liquiritigenin	Gancao	CYP19A1	Liquiritigenin (Gancao)	153.146
gancao_069	Liquiritigenin	Gancao	PKIA	Liquiritigenin (Gancao)	153.146
gancao_069	Liquiritigenin	Gancao	PTP1B	Liquiritigenin (Gancao)	153.146
gancao_069	Liquiritigenin	Gancao	PTPN1	Liquiritigenin (Gancao)	153.146
gancao_072	Liquiritin	Gancao	CALM1	Liquiritin (Gancao)	601.082
gancao_072	Liquiritin	Gancao	P4HB	Liquiritin (Gancao)	601.082
gancao_073	Lupiwighteone	Gancao	CALM1	Lupiwighteone (Gancao)	0.0741491
gancao_073	Lupiwighteone	Gancao	CCNA2	Lupiwighteone (Gancao)	0.0741491
gancao_073	Lupiwighteone	Gancao	NCOA2	Lupiwighteone (Gancao)	0.0741491
gancao_073	Lupiwighteone	Gancao	PIM1	Lupiwighteone (Gancao)	0.0741491
gancao_073	Lupiwighteone	Gancao	PRSS1	Lupiwighteone (Gancao)	0.0741491
gancao_076	4’-0-Methylglabridin	Gancao	CALM1	4’-0-Methylglabridin (Gancao)	0.0711915
gancao_076	4’-0-Methylglabridin	Gancao	CCNA2	4’-0-Methylglabridin (Gancao)	0.0711915
gancao_076	4’-0-Methylglabridin	Gancao	KCNMA1	4’-0-Methylglabridin (Gancao)	0.0711915
gancao_076	4’-0-Methylglabridin	Gancao	NCOA1	4’-0-Methylglabridin (Gancao)	0.0711915
gancao_076	4’-0-Methylglabridin	Gancao	NCOA2	4’-0-Methylglabridin (Gancao)	0.0711915
gancao_076	4’-0-Methylglabridin	Gancao	PIM1	4’-0-Methylglabridin (Gancao)	0.0711915
gancao_076	4’-0-Methylglabridin	Gancao	PRSS1	4’-0-Methylglabridin (Gancao)	0.0711915
gancao_077	Methylglycyrrhetate	Gancao	CES1	Methylglycyrrhetate (Gancao)	0.0807492
gancao_077	Methylglycyrrhetate	Gancao	CES2	Methylglycyrrhetate (Gancao)	0.0807492
gancao_083	Neoisoliquiritin	Gancao	AKR1B1	Neoisoliquiritin (Gancao)	0.033584
gancao_086	Phaseollinisoflavan	Gancao	CALM1	Phaseollinisoflavan (Gancao)	0.0773457
gancao_086	Phaseollinisoflavan	Gancao	CCNA2	Phaseollinisoflavan (Gancao)	0.0773457
gancao_086	Phaseollinisoflavan	Gancao	NCOA2	Phaseollinisoflavan (Gancao)	0.0773457
gancao_086	Phaseollinisoflavan	Gancao	PIM1	Phaseollinisoflavan (Gancao)	0.0773457
gancao_086	Phaseollinisoflavan	Gancao	PRSS1	Phaseollinisoflavan (Gancao)	0.0773457
gancao_086	Phaseollinisoflavan	Gancao	RXRB	Phaseollinisoflavan (Gancao)	0.0773457
gancao_087	Rutin	Gancao	HMGCR	Rutin (Gancao)	0.0295863
gancao_087	Rutin	Gancao	IL1B	Rutin (Gancao)	0.0295863
gancao_087	Rutin	Gancao	IL6	Rutin (Gancao)	0.0295863
gancao_087	Rutin	Gancao	INS	Rutin (Gancao)	0.0295863
gancao_087	Rutin	Gancao	ITGB2	Rutin (Gancao)	0.0295863
gancao_087	Rutin	Gancao	POR	Rutin (Gancao)	0.0295863
gancao_087	Rutin	Gancao	SOD1	Rutin (Gancao)	0.0295863
gancao_087	Rutin	Gancao	TBXA2R	Rutin (Gancao)	0.0295863
gancao_088	Sigmoidin B	Gancao	CALM1	Sigmoidin B (Gancao)	0.0676012
gancao_088	Sigmoidin B	Gancao	PTPN1	Sigmoidin B (Gancao)	0.0676012
gancao_093	2,4,4’-Trihydroxychalcone	Gancao	CHRNA7	2,4,4’-Trihydroxychalcone (Gancao)	0.101826
gancao_094	Uralene	Gancao	PIM1	Uralene (Gancao)	0.0940035
gancao_094	Uralene	Gancao	PRSS1	Uralene (Gancao)	0.0940035
gancao_095	Uralenin	Gancao	CALM1	Uralenin (Gancao)	0.0676012
gancao_095	Uralenin	Gancao	PTPN1	Uralenin (Gancao)	0.0676012
gancao_097	Uralenol	Gancao	PTPN1	Uralenol (Gancao)	0.0894255
gancao_099	Uralsaponin A	Gancao	GPT2	Uralsaponin A (Gancao)	0.0317077
gancao_099	Uralsaponin A	Gancao	HMOX1	Uralsaponin A (Gancao)	0.0317077
gancao_099	Uralsaponin A	Gancao	MPO	Uralsaponin A (Gancao)	0.0317077
MOL000012	Arachic acid	Gancao	F7	Arachic acid (Gancao)	0.0738691
MOL000012	Arachic acid	Gancao	HSP90AA1	Arachic acid (Gancao)	0.0738691
MOL000012	Arachic acid	Gancao	IGHG1	Arachic acid (Gancao)	0.0738691
MOL000012	Arachic acid	Gancao	NCOA2	Arachic acid (Gancao)	0.0738691
MOL000012	Arachic acid	Gancao	PIK3CG	Arachic acid (Gancao)	0.0738691
MOL000012	Arachic acid	Gancao	PTGS1	Arachic acid (Gancao)	0.0738691
MOL000012	Arachic acid	Gancao	PTGS2	Arachic acid (Gancao)	0.0738691
MOL000012	Arachic acid	Gancao	PTPN1	Arachic acid (Gancao)	0.0738691
MOL000057	DIBP	Gancao	ADRB2	DIBP (Gancao)	0.180296
MOL000057	DIBP	Gancao	HTR2A	DIBP (Gancao)	0.180296
MOL000057	DIBP	Gancao	NCOA2	DIBP (Gancao)	0.180296
MOL000057	DIBP	Gancao	NR3C1	DIBP (Gancao)	0.180296
MOL000057	DIBP	Gancao	NR3C2	DIBP (Gancao)	0.180296
MOL000057	DIBP	Gancao	PGR	DIBP (Gancao)	0.180296
MOL000057	DIBP	Gancao	RXRA	DIBP (Gancao)	0.180296
MOL000057	DIBP	Gancao	SLC6A3	DIBP (Gancao)	0.180296
MOL000057	DIBP	Gancao	SLC6A4	DIBP (Gancao)	0.180296
MOL000239	Jaranol	Gancao	CALM1	Jaranol (Gancao)	0.0830232
MOL000239	Jaranol	Gancao	CDK2	Jaranol (Gancao)	0.0830232
MOL000239	Jaranol	Gancao	CHEK1	Jaranol (Gancao)	0.0830232
MOL000239	Jaranol	Gancao	ESR2	Jaranol (Gancao)	0.0830232
MOL000239	Jaranol	Gancao	NCOA2	Jaranol (Gancao)	0.0830232
MOL000239	Jaranol	Gancao	NOS2	Jaranol (Gancao)	0.0830232
MOL000239	Jaranol	Gancao	PRSS1	Jaranol (Gancao)	0.0830232
MOL000391	Ononin	Gancao	ALDH2	Ononin (Gancao)	0.069962
MOL000391	Ononin	Gancao	CALM1	Ononin (Gancao)	0.069962
MOL000391	Ononin	Gancao	IL2	Ononin (Gancao)	0.069962
MOL000391	Ononin	Gancao	KDR	Ononin (Gancao)	0.069962
MOL000417	Calycosin	Gancao	CALM1	Calycosin (Gancao)	0.162404
MOL000417	Calycosin	Gancao	CCNA2	Calycosin (Gancao)	0.162404
MOL000417	Calycosin	Gancao	NCOA2	Calycosin (Gancao)	0.162404
MOL000417	Calycosin	Gancao	PIM1	Calycosin (Gancao)	0.162404
MOL000417	Calycosin	Gancao	PRSS1	Calycosin (Gancao)	0.162404
MOL000467	Castanin	Gancao	CALM1	Castanin (Gancao)	0.161504
MOL000467	Castanin	Gancao	CCNA2	Castanin (Gancao)	0.161504
MOL000467	Castanin	Gancao	IGHG1	Castanin (Gancao)	0.161504
MOL000467	Castanin	Gancao	KLK7	Castanin (Gancao)	0.161504
MOL000467	Castanin	Gancao	NCOA2	Castanin (Gancao)	0.161504
MOL000467	Castanin	Gancao	PIM1	Castanin (Gancao)	0.161504
MOL000467	Castanin	Gancao	PRSS1	Castanin (Gancao)	0.161504
MOL000475	anethole	Gancao	IL2	anethole (Gancao)	0.325064
MOL000475	anethole	Gancao	PRSS3	anethole (Gancao)	0.325064
MOL000475	anethole	Gancao	REN	anethole (Gancao)	0.325064
MOL000475	anethole	Gancao	IL2	anethole (Gancao)	0.486622
MOL000475	anethole	Gancao	PRSS3	anethole (Gancao)	0.486622
MOL000475	anethole	Gancao	REN	anethole (Gancao)	0.486622
MOL000497	licochalcone a	Gancao	CALM1	licochalcone a (Gancao)	0.0622848
MOL000497	licochalcone a	Gancao	CCNA2	licochalcone a (Gancao)	0.0622848
MOL000497	licochalcone a	Gancao	NCOA2	licochalcone a (Gancao)	0.0622848
MOL000497	licochalcone a	Gancao	PIM1	licochalcone a (Gancao)	0.0622848
MOL000497	licochalcone a	Gancao	PTPN1	licochalcone a (Gancao)	0.0622848
MOL000497	licochalcone a	Gancao	RB1	licochalcone a (Gancao)	0.0622848
MOL000500	Vestitol	Gancao	CALM1	Vestitol (Gancao)	0.0995167
MOL000500	Vestitol	Gancao	CCNA2	Vestitol (Gancao)	0.0995167
MOL000500	Vestitol	Gancao	PIM1	Vestitol (Gancao)	0.0995167
MOL000500	Vestitol	Gancao	PKIA	Vestitol (Gancao)	0.0995167
MOL000500	Vestitol	Gancao	PRSS1	Vestitol (Gancao)	0.0995167
MOL000511	ursolic acid	Gancao	ACP1	ursolic acid (Gancao)	0.0791175
MOL000511	ursolic acid	Gancao	AKR1B1	ursolic acid (Gancao)	0.0791175
MOL000511	ursolic acid	Gancao	AKR1B10	ursolic acid (Gancao)	0.0791175
MOL000511	ursolic acid	Gancao	CDK6	ursolic acid (Gancao)	0.0791175
MOL000511	ursolic acid	Gancao	CTSB	ursolic acid (Gancao)	0.0791175
MOL000511	ursolic acid	Gancao	CYP19A1	ursolic acid (Gancao)	0.0791175
MOL000511	ursolic acid	Gancao	ELANE	ursolic acid (Gancao)	0.0791175
MOL000511	ursolic acid	Gancao	GPBAR1	ursolic acid (Gancao)	0.0791175
MOL000511	ursolic acid	Gancao	HBEGF	ursolic acid (Gancao)	0.0791175
MOL000511	ursolic acid	Gancao	HSD11B1	ursolic acid (Gancao)	0.0791175
MOL000511	ursolic acid	Gancao	MAPK8	ursolic acid (Gancao)	0.0791175
MOL000511	ursolic acid	Gancao	MMP10	ursolic acid (Gancao)	0.0791175
MOL000511	ursolic acid	Gancao	POLB	ursolic acid (Gancao)	0.0791175
MOL000511	ursolic acid	Gancao	PPARA	ursolic acid (Gancao)	0.0791175
MOL000511	ursolic acid	Gancao	PTGER3	ursolic acid (Gancao)	0.0791175
MOL000511	ursolic acid	Gancao	PTGS1	ursolic acid (Gancao)	0.0791175
MOL000511	ursolic acid	Gancao	PTGS2	ursolic acid (Gancao)	0.0791175
MOL000511	ursolic acid	Gancao	PTPN1	ursolic acid (Gancao)	0.0791175
MOL000511	ursolic acid	Gancao	PTPN2	ursolic acid (Gancao)	0.0791175
MOL000511	ursolic acid	Gancao	PTPN6	ursolic acid (Gancao)	0.0791175
MOL000511	ursolic acid	Gancao	PTPRE	ursolic acid (Gancao)	0.0791175
MOL000511	ursolic acid	Gancao	PTPRF	ursolic acid (Gancao)	0.0791175
MOL000511	ursolic acid	Gancao	RORC	ursolic acid (Gancao)	0.0791175
MOL000511	ursolic acid	Gancao	SELE	ursolic acid (Gancao)	0.0791175
MOL000511	ursolic acid	Gancao	SLCO1B1	ursolic acid (Gancao)	0.0791175
MOL000511	ursolic acid	Gancao	SLCO1B3	ursolic acid (Gancao)	0.0791175
MOL000671	()-Menthol	Gancao	IGHG1	()-Menthol (Gancao)	0.237658
MOL001599	α-cubebol	Gancao	GABRA6	α-cubebol (Gancao)	0.163788
MOL001599	α-cubebol	Gancao	GRIA2	α-cubebol (Gancao)	0.163788
MOL001696	Morusin	Gancao	ALOX12	Morusin (Gancao)	0.0692282
MOL001696	Morusin	Gancao	ALOX5	Morusin (Gancao)	0.0692282
MOL001696	Morusin	Gancao	BACE1	Morusin (Gancao)	0.0692282
MOL001696	Morusin	Gancao	CALM1	Morusin (Gancao)	0.0692282
MOL001696	Morusin	Gancao	KCNMA1	Morusin (Gancao)	0.0692282
MOL001696	Morusin	Gancao	NCOA2	Morusin (Gancao)	0.0692282
MOL001696	Morusin	Gancao	PIM1	Morusin (Gancao)	0.0692282
MOL001696	Morusin	Gancao	PRSS1	Morusin (Gancao)	0.0692282
MOL001696	Morusin	Gancao	PTGS1	Morusin (Gancao)	0.0692282
MOL001696	Morusin	Gancao	PTGS2	Morusin (Gancao)	0.0692282
MOL001850	Izoforon	Gancao	GABRA6	Izoforon (Gancao)	0.428483
MOL002166	ISOHEPTANE	Gancao	PRSS3	ISOHEPTANE (Gancao)	0.480779
MOL002198	Heptan	Gancao	PRSS3	Heptan (Gancao)	0.370628
MOL002565	Medicarpin	Gancao	CALM1	Medicarpin (Gancao)	0.0854164
MOL002565	Medicarpin	Gancao	CCNA2	Medicarpin (Gancao)	0.0854164
MOL002565	Medicarpin	Gancao	MAPK10	Medicarpin (Gancao)	0.0854164
MOL002565	Medicarpin	Gancao	PIM1	Medicarpin (Gancao)	0.0854164
MOL002565	Medicarpin	Gancao	PRSS1	Medicarpin (Gancao)	0.0854164
MOL002943	BuOH	Gancao	PLA2G2E	BuOH (Gancao)	0.514591
MOL002943	BuOH	Gancao	PRSS3	BuOH (Gancao)	0.514591
MOL003218	Neouralenol	Gancao	CCNA2	Neouralenol (Gancao)	0.121959
MOL003218	Neouralenol	Gancao	PIM1	Neouralenol (Gancao)	0.121959
MOL003218	Neouralenol	Gancao	PRSS1	Neouralenol (Gancao)	0.121959
MOL003896	7-Methoxy-2-methyl isoflavone	Gancao	CALM1	7-Methoxy-2-methyl isoflavone (Gancao)	0.222385
MOL003896	7-Methoxy-2-methyl isoflavone	Gancao	CCNA2	7-Methoxy-2-methyl isoflavone (Gancao)	0.222385
MOL003896	7-Methoxy-2-methyl isoflavone	Gancao	IGHG1	7-Methoxy-2-methyl isoflavone (Gancao)	0.222385
MOL003896	7-Methoxy-2-methyl isoflavone	Gancao	NCOA1	7-Methoxy-2-methyl isoflavone (Gancao)	0.222385
MOL003896	7-Methoxy-2-methyl isoflavone	Gancao	NCOA2	7-Methoxy-2-methyl isoflavone (Gancao)	0.222385
MOL003896	7-Methoxy-2-methyl isoflavone	Gancao	PIM1	7-Methoxy-2-methyl isoflavone (Gancao)	0.222385
MOL003896	7-Methoxy-2-methyl isoflavone	Gancao	PKIA	7-Methoxy-2-methyl isoflavone (Gancao)	0.222385
MOL003896	7-Methoxy-2-methyl isoflavone	Gancao	PRSS1	7-Methoxy-2-methyl isoflavone (Gancao)	0.222385
MOL004385	Yinyanghuo D	Gancao	CALM1	Yinyanghuo D (Gancao)	0.0860263
MOL004385	Yinyanghuo D	Gancao	CCNA2	Yinyanghuo D (Gancao)	0.0860263
MOL004385	Yinyanghuo D	Gancao	NCOA2	Yinyanghuo D (Gancao)	0.0860263
MOL004385	Yinyanghuo D	Gancao	PIM1	Yinyanghuo D (Gancao)	0.0860263
MOL004385	Yinyanghuo D	Gancao	PRSS1	Yinyanghuo D (Gancao)	0.0860263
MOL004385	Yinyanghuo D	Gancao	PTPN1	Yinyanghuo D (Gancao)	0.0860263
MOL004589	Methylheptane	Gancao	PRSS3	Methylheptane (Gancao)	0.404152
MOL004805	(2S)-2-[4-hydroxy-3-(3-methylbut-2-enyl)phenyl]-8,8-dimethyl-2,3-dihydropyrano[2,3-f]chromen-4-one	Gancao	CALM1	(2S)-2-[4-hydroxy-3-(3-methylbut-2-enyl)phenyl]-8,8-dimethyl-2,3-dihydropyrano[2,3-f]chromen-4-one (Gancao)	0.0642522
MOL004805	(2S)-2-[4-hydroxy-3-(3-methylbut-2-enyl)phenyl]-8,8-dimethyl-2,3-dihydropyrano[2,3-f]chromen-4-one	Gancao	PIM1	(2S)-2-[4-hydroxy-3-(3-methylbut-2-enyl)phenyl]-8,8-dimethyl-2,3-dihydropyrano[2,3-f]chromen-4-one (Gancao)	0.0642522
MOL004806	euchrenone	Gancao	CALM1	euchrenone (Gancao)	0.0444338
MOL004806	euchrenone	Gancao	PIM1	euchrenone (Gancao)	0.0444338
MOL004807	glucuronic acid	Gancao	GRIA2	glucuronic acid (Gancao)	0.170594
MOL004807	glucuronic acid	Gancao	IGHG1	glucuronic acid (Gancao)	0.170594
MOL004807	glucuronic acid	Gancao	LCT	glucuronic acid (Gancao)	0.170594
MOL004807	glucuronic acid	Gancao	SOD1	glucuronic acid (Gancao)	0.170594
MOL004808	glyasperin B	Gancao	CALM1	glyasperin B (Gancao)	0.0867027
MOL004808	glyasperin B	Gancao	CCNA2	glyasperin B (Gancao)	0.0867027
MOL004808	glyasperin B	Gancao	NCOA2	glyasperin B (Gancao)	0.0867027
MOL004808	glyasperin B	Gancao	PIM1	glyasperin B (Gancao)	0.0867027
MOL004808	glyasperin B	Gancao	PRSS1	glyasperin B (Gancao)	0.0867027
MOL004810	glyasperin F	Gancao	CALM1	glyasperin F (Gancao)	0.0878125
MOL004810	glyasperin F	Gancao	CCNA2	glyasperin F (Gancao)	0.0878125
MOL004810	glyasperin F	Gancao	PIM1	glyasperin F (Gancao)	0.0878125
MOL004810	glyasperin F	Gancao	PRSS1	glyasperin F (Gancao)	0.0878125
MOL004811	Glyasperin C	Gancao	CALM1	Glyasperin C (Gancao)	0.0901044
MOL004811	Glyasperin C	Gancao	CCNA2	Glyasperin C (Gancao)	0.0901044
MOL004811	Glyasperin C	Gancao	NCOA2	Glyasperin C (Gancao)	0.0901044
MOL004811	Glyasperin C	Gancao	PIM1	Glyasperin C (Gancao)	0.0901044
MOL004811	Glyasperin C	Gancao	PRSS1	Glyasperin C (Gancao)	0.0901044
MOL004811	Glyasperin C	Gancao	TYR	Glyasperin C (Gancao)	0.0901044
MOL004815	(E)-1-(2,4-dihydroxyphenyl)-3-(2,2-dimethylchromen-6-yl)prop-2-en-1-one	Gancao	CALM1	(E)-1-(2,4-dihydroxyphenyl)-3-(2,2-dimethylchromen-6-yl)prop-2-en-1-one (Gancao)	0.108974
MOL004815	(E)-1-(2,4-dihydroxyphenyl)-3-(2,2-dimethylchromen-6-yl)prop-2-en-1-one	Gancao	CCNA2	(E)-1-(2,4-dihydroxyphenyl)-3-(2,2-dimethylchromen-6-yl)prop-2-en-1-one (Gancao)	0.108974
MOL004815	(E)-1-(2,4-dihydroxyphenyl)-3-(2,2-dimethylchromen-6-yl)prop-2-en-1-one	Gancao	NCOA2	(E)-1-(2,4-dihydroxyphenyl)-3-(2,2-dimethylchromen-6-yl)prop-2-en-1-one (Gancao)	0.108974
MOL004815	(E)-1-(2,4-dihydroxyphenyl)-3-(2,2-dimethylchromen-6-yl)prop-2-en-1-one	Gancao	PIM1	(E)-1-(2,4-dihydroxyphenyl)-3-(2,2-dimethylchromen-6-yl)prop-2-en-1-one (Gancao)	0.108974
MOL004815	(E)-1-(2,4-dihydroxyphenyl)-3-(2,2-dimethylchromen-6-yl)prop-2-en-1-one	Gancao	PTPN1	(E)-1-(2,4-dihydroxyphenyl)-3-(2,2-dimethylchromen-6-yl)prop-2-en-1-one (Gancao)	0.108974
MOL004820	kanzonols W	Gancao	CALM1	kanzonols W (Gancao)	0.092516
MOL004820	kanzonols W	Gancao	CCNA2	kanzonols W (Gancao)	0.092516
MOL004820	kanzonols W	Gancao	NCOA1	kanzonols W (Gancao)	0.092516
MOL004820	kanzonols W	Gancao	NCOA2	kanzonols W (Gancao)	0.092516
MOL004820	kanzonols W	Gancao	PIM1	kanzonols W (Gancao)	0.092516
MOL004820	kanzonols W	Gancao	PRSS1	kanzonols W (Gancao)	0.092516
MOL004824	(2S)-6-(2,4-dihydroxyphenyl)-2-(2-hydroxypropan-2-yl)-4-methoxy-2,3-dihydrofuro[3,2-g]chromen-7-one	Gancao	CALM1	(2S)-6-(2,4-dihydroxyphenyl)-2-(2-hydroxypropan-2-yl)-4-methoxy-2,3-dihydrofuro[3,2-g]chromen-7-one (Gancao)	0.0757255
MOL004824	(2S)-6-(2,4-dihydroxyphenyl)-2-(2-hydroxypropan-2-yl)-4-methoxy-2,3-dihydrofuro[3,2-g]chromen-7-one	Gancao	CCNA2	(2S)-6-(2,4-dihydroxyphenyl)-2-(2-hydroxypropan-2-yl)-4-methoxy-2,3-dihydrofuro[3,2-g]chromen-7-one (Gancao)	0.0757255
MOL004824	(2S)-6-(2,4-dihydroxyphenyl)-2-(2-hydroxypropan-2-yl)-4-methoxy-2,3-dihydrofuro[3,2-g]chromen-7-one	Gancao	PIM1	(2S)-6-(2,4-dihydroxyphenyl)-2-(2-hydroxypropan-2-yl)-4-methoxy-2,3-dihydrofuro[3,2-g]chromen-7-one (Gancao)	0.0757255
MOL004824	(2S)-6-(2,4-dihydroxyphenyl)-2-(2-hydroxypropan-2-yl)-4-methoxy-2,3-dihydrofuro[3,2-g]chromen-7-one	Gancao	PRSS1	(2S)-6-(2,4-dihydroxyphenyl)-2-(2-hydroxypropan-2-yl)-4-methoxy-2,3-dihydrofuro[3,2-g]chromen-7-one (Gancao)	0.0757255
MOL004827	Semilicoisoflavone B	Gancao	CALM1	Semilicoisoflavone B (Gancao)	0.0968493
MOL004827	Semilicoisoflavone B	Gancao	PRSS1	Semilicoisoflavone B (Gancao)	0.0968493
MOL004828	Glepidotin A	Gancao	CALM1	Glepidotin A (Gancao)	0.112729
MOL004828	Glepidotin A	Gancao	CCNA2	Glepidotin A (Gancao)	0.112729
MOL004828	Glepidotin A	Gancao	IGHG1	Glepidotin A (Gancao)	0.112729
MOL004828	Glepidotin A	Gancao	PIM1	Glepidotin A (Gancao)	0.112729
MOL004828	Glepidotin A	Gancao	PRSS1	Glepidotin A (Gancao)	0.112729
MOL004829	Glepidotin B	Gancao	CALM1	Glepidotin B (Gancao)	0.0560204
MOL004829	Glepidotin B	Gancao	IGHG1	Glepidotin B (Gancao)	0.0560204
MOL004829	Glepidotin B	Gancao	NCOA1	Glepidotin B (Gancao)	0.0560204
MOL004830	Octadiene	Gancao	PRSS3	Octadiene (Gancao)	0.337012
MOL004835	Glypallichalcone	Gancao	CALM1	Glypallichalcone (Gancao)	0.088245
MOL004835	Glypallichalcone	Gancao	CCNA2	Glypallichalcone (Gancao)	0.088245
MOL004835	Glypallichalcone	Gancao	NCOA1	Glypallichalcone (Gancao)	0.088245
MOL004835	Glypallichalcone	Gancao	PKIA	Glypallichalcone (Gancao)	0.088245
MOL004836	echinatin	Gancao	CCNA2	echinatin (Gancao)	0.100259
MOL004836	echinatin	Gancao	NCOA2	echinatin (Gancao)	0.100259
MOL004836	echinatin	Gancao	PIM1	echinatin (Gancao)	0.100259
MOL004836	echinatin	Gancao	PKIA	echinatin (Gancao)	0.100259
MOL004837	Karenzu DK2	Gancao	ACHE	Karenzu DK2 (Gancao)	0.281961
MOL004837	Karenzu DK2	Gancao	BCHE	Karenzu DK2 (Gancao)	0.281961
MOL004837	Karenzu DK2	Gancao	CES1	Karenzu DK2 (Gancao)	0.281961
MOL004837	Karenzu DK2	Gancao	F12	Karenzu DK2 (Gancao)	0.281961
MOL004837	Karenzu DK2	Gancao	PKIA	Karenzu DK2 (Gancao)	0.281961
MOL004839	(1S,2S)-1,2-dimethylcyclopentane	Gancao	PRSS3	(1S,2S)-1,2-dimethylcyclopentane (Gancao)	0.54174
MOL004841	Licochalcone B	Gancao	CALM1	Licochalcone B (Gancao)	0.0736238
MOL004841	Licochalcone B	Gancao	CCNA2	Licochalcone B (Gancao)	0.0736238
MOL004841	Licochalcone B	Gancao	PIM1	Licochalcone B (Gancao)	0.0736238
MOL004847	2,2-DIMETHYLPENTANE	Gancao	PRSS3	2,2-DIMETHYLPENTANE (Gancao)	0.550894
MOL004848	licochalcone G	Gancao	CALM1	licochalcone G (Gancao)	0.0906169
MOL004848	licochalcone G	Gancao	CCNA2	licochalcone G (Gancao)	0.0906169
MOL004848	licochalcone G	Gancao	IGHG1	licochalcone G (Gancao)	0.0906169
MOL004848	licochalcone G	Gancao	NCOA2	licochalcone G (Gancao)	0.0906169
MOL004848	licochalcone G	Gancao	PIM1	licochalcone G (Gancao)	0.0906169
MOL004849	3-(2,4-dihydroxyphenyl)-8-(1,1-dimethylprop-2-enyl)-7-hydroxy-5-methoxy-coumarin	Gancao	CALM1	3-(2,4-dihydroxyphenyl)-8-(1,1-dimethylprop-2-enyl)-7-hydroxy-5-methoxy-coumarin (Gancao)	0.100813
MOL004849	3-(2,4-dihydroxyphenyl)-8-(1,1-dimethylprop-2-enyl)-7-hydroxy-5-methoxy-coumarin	Gancao	NCOA1	3-(2,4-dihydroxyphenyl)-8-(1,1-dimethylprop-2-enyl)-7-hydroxy-5-methoxy-coumarin (Gancao)	0.100813
MOL004849	3-(2,4-dihydroxyphenyl)-8-(1,1-dimethylprop-2-enyl)-7-hydroxy-5-methoxy-coumarin	Gancao	NCOA2	3-(2,4-dihydroxyphenyl)-8-(1,1-dimethylprop-2-enyl)-7-hydroxy-5-methoxy-coumarin (Gancao)	0.100813
MOL004849	3-(2,4-dihydroxyphenyl)-8-(1,1-dimethylprop-2-enyl)-7-hydroxy-5-methoxy-coumarin	Gancao	PIM1	3-(2,4-dihydroxyphenyl)-8-(1,1-dimethylprop-2-enyl)-7-hydroxy-5-methoxy-coumarin (Gancao)	0.100813
MOL004849	3-(2,4-dihydroxyphenyl)-8-(1,1-dimethylprop-2-enyl)-7-hydroxy-5-methoxy-coumarin	Gancao	PRSS1	3-(2,4-dihydroxyphenyl)-8-(1,1-dimethylprop-2-enyl)-7-hydroxy-5-methoxy-coumarin (Gancao)	0.100813
MOL004853	Licoflavonol	Gancao	CALM1	Licoflavonol (Gancao)	0.0849773
MOL004853	Licoflavonol	Gancao	CCNA2	Licoflavonol (Gancao)	0.0849773
MOL004853	Licoflavonol	Gancao	NCOA2	Licoflavonol (Gancao)	0.0849773
MOL004853	Licoflavonol	Gancao	PIM1	Licoflavonol (Gancao)	0.0849773
MOL004853	Licoflavonol	Gancao	PRSS1	Licoflavonol (Gancao)	0.0849773
MOL004863	3-(3,4-dihydroxyphenyl)-5,7-dihydroxy-8-(3-methylbut-2-enyl)chromone	Gancao	CALM1	3-(3,4-dihydroxyphenyl)-5,7-dihydroxy-8-(3-methylbut-2-enyl)chromone (Gancao)	0.107639
MOL004863	3-(3,4-dihydroxyphenyl)-5,7-dihydroxy-8-(3-methylbut-2-enyl)chromone	Gancao	CCNA2	3-(3,4-dihydroxyphenyl)-5,7-dihydroxy-8-(3-methylbut-2-enyl)chromone (Gancao)	0.107639
MOL004863	3-(3,4-dihydroxyphenyl)-5,7-dihydroxy-8-(3-methylbut-2-enyl)chromone	Gancao	NCOA2	3-(3,4-dihydroxyphenyl)-5,7-dihydroxy-8-(3-methylbut-2-enyl)chromone (Gancao)	0.107639
MOL004863	3-(3,4-dihydroxyphenyl)-5,7-dihydroxy-8-(3-methylbut-2-enyl)chromone	Gancao	PIM1	3-(3,4-dihydroxyphenyl)-5,7-dihydroxy-8-(3-methylbut-2-enyl)chromone (Gancao)	0.107639
MOL004863	3-(3,4-dihydroxyphenyl)-5,7-dihydroxy-8-(3-methylbut-2-enyl)chromone	Gancao	PRSS1	3-(3,4-dihydroxyphenyl)-5,7-dihydroxy-8-(3-methylbut-2-enyl)chromone (Gancao)	0.107639
MOL004864	5,7-dihydroxy-3-(4-methoxyphenyl)-8-(3-methylbut-2-enyl)chromone	Gancao	CALM1	5,7-dihydroxy-3-(4-methoxyphenyl)-8-(3-methylbut-2-enyl)chromone (Gancao)	0.0996886
MOL004864	5,7-dihydroxy-3-(4-methoxyphenyl)-8-(3-methylbut-2-enyl)chromone	Gancao	CCNA2	5,7-dihydroxy-3-(4-methoxyphenyl)-8-(3-methylbut-2-enyl)chromone (Gancao)	0.0996886
MOL004864	5,7-dihydroxy-3-(4-methoxyphenyl)-8-(3-methylbut-2-enyl)chromone	Gancao	NCOA2	5,7-dihydroxy-3-(4-methoxyphenyl)-8-(3-methylbut-2-enyl)chromone (Gancao)	0.0996886
MOL004864	5,7-dihydroxy-3-(4-methoxyphenyl)-8-(3-methylbut-2-enyl)chromone	Gancao	PIM1	5,7-dihydroxy-3-(4-methoxyphenyl)-8-(3-methylbut-2-enyl)chromone (Gancao)	0.0996886
MOL004864	5,7-dihydroxy-3-(4-methoxyphenyl)-8-(3-methylbut-2-enyl)chromone	Gancao	PRSS1	5,7-dihydroxy-3-(4-methoxyphenyl)-8-(3-methylbut-2-enyl)chromone (Gancao)	0.0996886
MOL004866	2-(3,4-dihydroxyphenyl)-5,7-dihydroxy-6-(3-methylbut-2-enyl)chromone	Gancao	AKT1	2-(3,4-dihydroxyphenyl)-5,7-dihydroxy-6-(3-methylbut-2-enyl)chromone (Gancao)	0.104804
MOL004866	2-(3,4-dihydroxyphenyl)-5,7-dihydroxy-6-(3-methylbut-2-enyl)chromone	Gancao	CALM1	2-(3,4-dihydroxyphenyl)-5,7-dihydroxy-6-(3-methylbut-2-enyl)chromone (Gancao)	0.104804
MOL004866	2-(3,4-dihydroxyphenyl)-5,7-dihydroxy-6-(3-methylbut-2-enyl)chromone	Gancao	CCNA2	2-(3,4-dihydroxyphenyl)-5,7-dihydroxy-6-(3-methylbut-2-enyl)chromone (Gancao)	0.104804
MOL004866	2-(3,4-dihydroxyphenyl)-5,7-dihydroxy-6-(3-methylbut-2-enyl)chromone	Gancao	PIM1	2-(3,4-dihydroxyphenyl)-5,7-dihydroxy-6-(3-methylbut-2-enyl)chromone (Gancao)	0.104804
MOL004866	2-(3,4-dihydroxyphenyl)-5,7-dihydroxy-6-(3-methylbut-2-enyl)chromone	Gancao	PRSS1	2-(3,4-dihydroxyphenyl)-5,7-dihydroxy-6-(3-methylbut-2-enyl)chromone (Gancao)	0.104804
MOL004871	(3S)-2,3-dimethylpentane	Gancao	PLG	(3S)-2,3-dimethylpentane (Gancao)	0.480779
MOL004871	(3S)-2,3-dimethylpentane	Gancao	PRSS3	(3S)-2,3-dimethylpentane (Gancao)	0.480779
MOL004881	(E)-1-[2,4-dihydroxy-3-(3-methylbut-2-enyl)phenyl]-3-(2,4-dihydroxyphenyl)prop-2-en-1-one	Gancao	CALM1	(E)-1-[2,4-dihydroxy-3-(3-methylbut-2-enyl)phenyl]-3-(2,4-dihydroxyphenyl)prop-2-en-1-one (Gancao)	0.0648755
MOL004881	(E)-1-[2,4-dihydroxy-3-(3-methylbut-2-enyl)phenyl]-3-(2,4-dihydroxyphenyl)prop-2-en-1-one	Gancao	CCNA2	(E)-1-[2,4-dihydroxy-3-(3-methylbut-2-enyl)phenyl]-3-(2,4-dihydroxyphenyl)prop-2-en-1-one (Gancao)	0.0648755
MOL004881	(E)-1-[2,4-dihydroxy-3-(3-methylbut-2-enyl)phenyl]-3-(2,4-dihydroxyphenyl)prop-2-en-1-one	Gancao	CYP19A1	(E)-1-[2,4-dihydroxy-3-(3-methylbut-2-enyl)phenyl]-3-(2,4-dihydroxyphenyl)prop-2-en-1-one (Gancao)	0.0648755
MOL004881	(E)-1-[2,4-dihydroxy-3-(3-methylbut-2-enyl)phenyl]-3-(2,4-dihydroxyphenyl)prop-2-en-1-one	Gancao	PIM1	(E)-1-[2,4-dihydroxy-3-(3-methylbut-2-enyl)phenyl]-3-(2,4-dihydroxyphenyl)prop-2-en-1-one (Gancao)	0.0648755
MOL004884	Licoisoflavone B	Gancao	CALM1	Licoisoflavone B (Gancao)	0.0826121
MOL004884	Licoisoflavone B	Gancao	CCNA2	Licoisoflavone B (Gancao)	0.0826121
MOL004884	Licoisoflavone B	Gancao	PIM1	Licoisoflavone B (Gancao)	0.0826121
MOL004884	Licoisoflavone B	Gancao	PRSS1	Licoisoflavone B (Gancao)	0.0826121
MOL004885	licoisoflavanone	Gancao	CALM1	licoisoflavanone (Gancao)	0.0821421
MOL004885	licoisoflavanone	Gancao	CCNA2	licoisoflavanone (Gancao)	0.0821421
MOL004885	licoisoflavanone	Gancao	NCOA1	licoisoflavanone (Gancao)	0.0821421
MOL004885	licoisoflavanone	Gancao	PIM1	licoisoflavanone (Gancao)	0.0821421
MOL004885	licoisoflavanone	Gancao	PRSS1	licoisoflavanone (Gancao)	0.0821421
MOL004891	shinpterocarpin	Gancao	CALM1	shinpterocarpin (Gancao)	0.0778293
MOL004891	shinpterocarpin	Gancao	CCNA2	shinpterocarpin (Gancao)	0.0778293
MOL004891	shinpterocarpin	Gancao	NCOA1	shinpterocarpin (Gancao)	0.0778293
MOL004891	shinpterocarpin	Gancao	PIM1	shinpterocarpin (Gancao)	0.0778293
MOL004891	shinpterocarpin	Gancao	PRSS1	shinpterocarpin (Gancao)	0.0778293
MOL004898	(E)-3-[3,4-dihydroxy-5-(3-methylbut-2-enyl)phenyl]-1-(2,4-dihydroxyphenyl)prop-2-en-1-one	Gancao	CALM1	(E)-3-[3,4-dihydroxy-5-(3-methylbut-2-enyl)phenyl]-1-(2,4-dihydroxyphenyl)prop-2-en-1-one (Gancao)	0.0943512
MOL004898	(E)-3-[3,4-dihydroxy-5-(3-methylbut-2-enyl)phenyl]-1-(2,4-dihydroxyphenyl)prop-2-en-1-one	Gancao	CCNA2	(E)-3-[3,4-dihydroxy-5-(3-methylbut-2-enyl)phenyl]-1-(2,4-dihydroxyphenyl)prop-2-en-1-one (Gancao)	0.0943512
MOL004898	(E)-3-[3,4-dihydroxy-5-(3-methylbut-2-enyl)phenyl]-1-(2,4-dihydroxyphenyl)prop-2-en-1-one	Gancao	NCOA2	(E)-3-[3,4-dihydroxy-5-(3-methylbut-2-enyl)phenyl]-1-(2,4-dihydroxyphenyl)prop-2-en-1-one (Gancao)	0.0943512
MOL004898	(E)-3-[3,4-dihydroxy-5-(3-methylbut-2-enyl)phenyl]-1-(2,4-dihydroxyphenyl)prop-2-en-1-one	Gancao	PIM1	(E)-3-[3,4-dihydroxy-5-(3-methylbut-2-enyl)phenyl]-1-(2,4-dihydroxyphenyl)prop-2-en-1-one (Gancao)	0.0943512
MOL004908	Glabridin	Gancao	CALM1	Glabridin (Gancao)	0.0804429
MOL004908	Glabridin	Gancao	CCNA2	Glabridin (Gancao)	0.0804429
MOL004908	Glabridin	Gancao	CYP3A4	Glabridin (Gancao)	0.0804429
MOL004908	Glabridin	Gancao	IGHG1	Glabridin (Gancao)	0.0804429
MOL004908	Glabridin	Gancao	NCOA1	Glabridin (Gancao)	0.0804429
MOL004908	Glabridin	Gancao	NCOA2	Glabridin (Gancao)	0.0804429
MOL004908	Glabridin	Gancao	PIM1	Glabridin (Gancao)	0.0804429
MOL004908	Glabridin	Gancao	PRSS1	Glabridin (Gancao)	0.0804429
MOL004908	Glabridin	Gancao	PTPN1	Glabridin (Gancao)	0.0804429
MOL004910	Glabranin	Gancao	CALM1	Glabranin (Gancao)	0.0711727
MOL004911	Glabrene	Gancao	CALM1	Glabrene (Gancao)	0.105858
MOL004911	Glabrene	Gancao	NCOA2	Glabrene (Gancao)	0.105858
MOL004911	Glabrene	Gancao	PIM1	Glabrene (Gancao)	0.105858
MOL004911	Glabrene	Gancao	PRSS1	Glabrene (Gancao)	0.105858
MOL004912	Glabrone	Gancao	CALM1	Glabrone (Gancao)	0.104443
MOL004912	Glabrone	Gancao	CCNA2	Glabrone (Gancao)	0.104443
MOL004912	Glabrone	Gancao	PIM1	Glabrone (Gancao)	0.104443
MOL004912	Glabrone	Gancao	PRSS1	Glabrone (Gancao)	0.104443
MOL004912	Glabrone	Gancao	PTPN1	Glabrone (Gancao)	0.104443
MOL004913	1,3-dihydroxy-9-methoxy-6-benzofurano[3,2-c]chromenone	Gancao	CCNA2	1,3-dihydroxy-9-methoxy-6-benzofurano[3,2-c]chromenone (Gancao)	0.127888
MOL004915	Eurycarpin A	Gancao	CALM1	Eurycarpin A (Gancao)	0.112729
MOL004915	Eurycarpin A	Gancao	CCNA2	Eurycarpin A (Gancao)	0.112729
MOL004915	Eurycarpin A	Gancao	PIM1	Eurycarpin A (Gancao)	0.112729
MOL004915	Eurycarpin A	Gancao	PRSS1	Eurycarpin A (Gancao)	0.112729
MOL004918	HEX	Gancao	PRSS3	HEX (Gancao)	0.594009
MOL004920	Methylcyclopentane	Gancao	PRSS3	Methylcyclopentane (Gancao)	0.655905
MOL004934	Isohexane	Gancao	PRSS3	Isohexane (Gancao)	0.698772
MOL004940	neoliquiritin	Gancao	CALM1	neoliquiritin (Gancao)	0.0215945
MOL004944	Cyclobutanol, 1-ethyl-	Gancao	PLG	Cyclobutanol, 1-ethyl- (Gancao)	0.491016
MOL004944	Cyclobutanol, 1-ethyl-	Gancao	PRSS3	Cyclobutanol, 1-ethyl- (Gancao)	0.491016
MOL004945	(2S)-7-hydroxy-2-(4-hydroxyphenyl)-8-(3-methylbut-2-enyl)chroman-4-one	Gancao	CALM1	(2S)-7-hydroxy-2-(4-hydroxyphenyl)-8-(3-methylbut-2-enyl)chroman-4-one (Gancao)	0.0587836
MOL004957	HMO	Gancao	CALM1	HMO (Gancao)	0.145901
MOL004957	HMO	Gancao	CCNA2	HMO (Gancao)	0.145901
MOL004957	HMO	Gancao	IGHG1	HMO (Gancao)	0.145901
MOL004957	HMO	Gancao	PIM1	HMO (Gancao)	0.145901
MOL004957	HMO	Gancao	PKIA	HMO (Gancao)	0.145901
MOL004957	HMO	Gancao	PRSS1	HMO (Gancao)	0.145901
MOL004959	1-Methoxyphaseollidin	Gancao	CALM1	1-Methoxyphaseollidin (Gancao)	0.0594729
MOL004959	1-Methoxyphaseollidin	Gancao	CCNA2	1-Methoxyphaseollidin (Gancao)	0.0594729
MOL004959	1-Methoxyphaseollidin	Gancao	NCOA1	1-Methoxyphaseollidin (Gancao)	0.0594729
MOL004959	1-Methoxyphaseollidin	Gancao	NCOA2	1-Methoxyphaseollidin (Gancao)	0.0594729
MOL004959	1-Methoxyphaseollidin	Gancao	PIM1	1-Methoxyphaseollidin (Gancao)	0.0594729
MOL004959	1-Methoxyphaseollidin	Gancao	PRSS1	1-Methoxyphaseollidin (Gancao)	0.0594729
MOL004964	(Z)-1-(2,4-dihydroxyphenyl)-3-phenylprop-2-en-1-one	Gancao	CCNA2	(Z)-1-(2,4-dihydroxyphenyl)-3-phenylprop-2-en-1-one (Gancao)	0.150395
MOL004964	(Z)-1-(2,4-dihydroxyphenyl)-3-phenylprop-2-en-1-one	Gancao	NCOA2	(Z)-1-(2,4-dihydroxyphenyl)-3-phenylprop-2-en-1-one (Gancao)	0.150395
MOL004964	(Z)-1-(2,4-dihydroxyphenyl)-3-phenylprop-2-en-1-one	Gancao	PIM1	(Z)-1-(2,4-dihydroxyphenyl)-3-phenylprop-2-en-1-one (Gancao)	0.150395
MOL004964	(Z)-1-(2,4-dihydroxyphenyl)-3-phenylprop-2-en-1-one	Gancao	PKIA	(Z)-1-(2,4-dihydroxyphenyl)-3-phenylprop-2-en-1-one (Gancao)	0.150395
MOL004966	3'-Hydroxy-4'-O-Methylglabridin	Gancao	CALM1	3'-Hydroxy-4'-O-Methylglabridin (Gancao)	0.0906169
MOL004966	3'-Hydroxy-4'-O-Methylglabridin	Gancao	CCNA2	3'-Hydroxy-4'-O-Methylglabridin (Gancao)	0.0906169
MOL004966	3'-Hydroxy-4'-O-Methylglabridin	Gancao	KCNMA1	3'-Hydroxy-4'-O-Methylglabridin (Gancao)	0.0906169
MOL004966	3'-Hydroxy-4'-O-Methylglabridin	Gancao	NCOA1	3'-Hydroxy-4'-O-Methylglabridin (Gancao)	0.0906169
MOL004966	3'-Hydroxy-4'-O-Methylglabridin	Gancao	NCOA2	3'-Hydroxy-4'-O-Methylglabridin (Gancao)	0.0906169
MOL004966	3'-Hydroxy-4'-O-Methylglabridin	Gancao	PIM1	3'-Hydroxy-4'-O-Methylglabridin (Gancao)	0.0906169
MOL004966	3'-Hydroxy-4'-O-Methylglabridin	Gancao	PRSS1	3'-Hydroxy-4'-O-Methylglabridin (Gancao)	0.0906169
MOL004967	3,3-Dimethylpentane	Gancao	PRSS3	3,3-Dimethylpentane (Gancao)	0.600956
MOL004970	3-methylheptane	Gancao	PRSS3	3-methylheptane (Gancao)	0.430537
MOL004971	3-methylhexane	Gancao	PRSS3	3-methylhexane (Gancao)	0.591
MOL004972	3-Methylpentane	Gancao	PRSS3	3-Methylpentane (Gancao)	0.663879
MOL004973	3-Ethylpentane	Gancao	PRSS3	3-Ethylpentane (Gancao)	0.550894
MOL004974	3'-Methoxyglabridin	Gancao	CALM1	3'-Methoxyglabridin (Gancao)	0.0736275
MOL004974	3'-Methoxyglabridin	Gancao	CCNA2	3'-Methoxyglabridin (Gancao)	0.0736275
MOL004974	3'-Methoxyglabridin	Gancao	KCNMA1	3'-Methoxyglabridin (Gancao)	0.0736275
MOL004974	3'-Methoxyglabridin	Gancao	NCOA1	3'-Methoxyglabridin (Gancao)	0.0736275
MOL004974	3'-Methoxyglabridin	Gancao	NCOA2	3'-Methoxyglabridin (Gancao)	0.0736275
MOL004974	3'-Methoxyglabridin	Gancao	PIM1	3'-Methoxyglabridin (Gancao)	0.0736275
MOL004974	3'-Methoxyglabridin	Gancao	PRSS1	3'-Methoxyglabridin (Gancao)	0.0736275
MOL004980	Inflacoumarin A	Gancao	CALM1	Inflacoumarin A (Gancao)	0.0934127
MOL004980	Inflacoumarin A	Gancao	NCOA2	Inflacoumarin A (Gancao)	0.0934127
MOL004980	Inflacoumarin A	Gancao	PIM1	Inflacoumarin A (Gancao)	0.0934127
MOL004980	Inflacoumarin A	Gancao	PRSS1	Inflacoumarin A (Gancao)	0.0934127
MOL004982	2,6,10-trimethyl-dodecane	Gancao	PRSS1	2,6,10-trimethyl-dodecane (Gancao)	0.313394
MOL004985	icos-5-enoic acid	Gancao	NCOA2	icos-5-enoic acid (Gancao)	0.087268
MOL004988	Kanzonol F	Gancao	CALM1	Kanzonol F (Gancao)	0.0596642
MOL004988	Kanzonol F	Gancao	NCOA2	Kanzonol F (Gancao)	0.0596642
MOL004988	Kanzonol F	Gancao	PIM1	Kanzonol F (Gancao)	0.0596642
MOL004989	6-prenylated eriodictyol	Gancao	CALM1	6-prenylated eriodictyol (Gancao)	0.0478867
MOL004990	7,2',4'-trihydroxy－5-methoxy-3－arylcoumarin	Gancao	PIM1	7,2',4'-trihydroxy－5-methoxy-3－arylcoumarin (Gancao)	0.130352
MOL004991	7-Acetoxy-2-methylisoflavone	Gancao	CALM1	7-Acetoxy-2-methylisoflavone (Gancao)	0.143234
MOL004991	7-Acetoxy-2-methylisoflavone	Gancao	NCOA2	7-Acetoxy-2-methylisoflavone (Gancao)	0.143234
MOL004991	7-Acetoxy-2-methylisoflavone	Gancao	PRSS1	7-Acetoxy-2-methylisoflavone (Gancao)	0.143234
MOL004993	8-prenylated eriodictyol	Gancao	CALM1	8-prenylated eriodictyol (Gancao)	0.0619629
MOL004993	8-prenylated eriodictyol	Gancao	NCOA1	8-prenylated eriodictyol (Gancao)	0.0619629
MOL004996	gadelaidic acid	Gancao	NCOA2	gadelaidic acid (Gancao)	0.087268
MOL005000	Gancaonin G	Gancao	CALM1	Gancaonin G (Gancao)	0.0996886
MOL005000	Gancaonin G	Gancao	CCNA2	Gancaonin G (Gancao)	0.0996886
MOL005000	Gancaonin G	Gancao	NCOA2	Gancaonin G (Gancao)	0.0996886
MOL005000	Gancaonin G	Gancao	PIM1	Gancaonin G (Gancao)	0.0996886
MOL005000	Gancaonin G	Gancao	PRSS1	Gancaonin G (Gancao)	0.0996886
MOL005001	Gancaonin H	Gancao	CALM1	Gancaonin H (Gancao)	0.102648
MOL005001	Gancaonin H	Gancao	CCNA2	Gancaonin H (Gancao)	0.102648
MOL005001	Gancaonin H	Gancao	NCOA2	Gancaonin H (Gancao)	0.102648
MOL005001	Gancaonin H	Gancao	PIM1	Gancaonin H (Gancao)	0.102648
MOL005001	Gancaonin H	Gancao	PRSS1	Gancaonin H (Gancao)	0.102648
MOL005003	Licoagrocarpin	Gancao	CALM1	Licoagrocarpin (Gancao)	0.0741397
MOL005003	Licoagrocarpin	Gancao	CCNA2	Licoagrocarpin (Gancao)	0.0741397
MOL005003	Licoagrocarpin	Gancao	NCOA2	Licoagrocarpin (Gancao)	0.0741397
MOL005003	Licoagrocarpin	Gancao	PIM1	Licoagrocarpin (Gancao)	0.0741397
MOL005003	Licoagrocarpin	Gancao	PRSS1	Licoagrocarpin (Gancao)	0.0741397
MOL005007	Glyasperins M	Gancao	CALM1	Glyasperins M (Gancao)	0.0735599
MOL005007	Glyasperins M	Gancao	CCNA2	Glyasperins M (Gancao)	0.0735599
MOL005007	Glyasperins M	Gancao	KCNMA1	Glyasperins M (Gancao)	0.0735599
MOL005007	Glyasperins M	Gancao	NCOA1	Glyasperins M (Gancao)	0.0735599
MOL005007	Glyasperins M	Gancao	NCOA2	Glyasperins M (Gancao)	0.0735599
MOL005007	Glyasperins M	Gancao	PIM1	Glyasperins M (Gancao)	0.0735599
MOL005007	Glyasperins M	Gancao	PRSS1	Glyasperins M (Gancao)	0.0735599
MOL005012	Licoagroisoflavone	Gancao	CALM1	Licoagroisoflavone (Gancao)	0.0775806
MOL005012	Licoagroisoflavone	Gancao	CCNA2	Licoagroisoflavone (Gancao)	0.0775806
MOL005012	Licoagroisoflavone	Gancao	PIM1	Licoagroisoflavone (Gancao)	0.0775806
MOL005012	Licoagroisoflavone	Gancao	PRSS1	Licoagroisoflavone (Gancao)	0.0775806
MOL005016	Odoratin	Gancao	CALM1	Odoratin (Gancao)	0.178833
MOL005016	Odoratin	Gancao	CCNA2	Odoratin (Gancao)	0.178833
MOL005016	Odoratin	Gancao	KCNMA1	Odoratin (Gancao)	0.178833
MOL005016	Odoratin	Gancao	NCOA1	Odoratin (Gancao)	0.178833
MOL005016	Odoratin	Gancao	NCOA2	Odoratin (Gancao)	0.178833
MOL005016	Odoratin	Gancao	PIM1	Odoratin (Gancao)	0.178833
MOL005016	Odoratin	Gancao	PRSS1	Odoratin (Gancao)	0.178833
MOL005016	Odoratin	Gancao	PTPN1	Odoratin (Gancao)	0.178833
MOL005017	Phaseol	Gancao	CCNA2	Phaseol (Gancao)	0.0895289
MOL005017	Phaseol	Gancao	PIM1	Phaseol (Gancao)	0.0895289
MOL005018	Xambioona	Gancao	CALM1	Xambioona (Gancao)	0.0826717
MOL005018	Xambioona	Gancao	NCOA2	Xambioona (Gancao)	0.0826717
MOL005018	Xambioona	Gancao	PIM1	Xambioona (Gancao)	0.0826717
MOL005020	dehydroglyasperins C	Gancao	CALM1	dehydroglyasperins C (Gancao)	0.0796134
MOL005020	dehydroglyasperins C	Gancao	CCNA2	dehydroglyasperins C (Gancao)	0.0796134
MOL005020	dehydroglyasperins C	Gancao	NCOA2	dehydroglyasperins C (Gancao)	0.0796134
MOL005020	dehydroglyasperins C	Gancao	PIM1	dehydroglyasperins C (Gancao)	0.0796134
MOL005020	dehydroglyasperins C	Gancao	PRSS1	dehydroglyasperins C (Gancao)	0.0796134
MOL005021	Mipax	Gancao	GRIA2	Mipax (Gancao)	0.310103
MOL005021	Mipax	Gancao	SLC6A3	Mipax (Gancao)	0.310103
MOL005021	Mipax	Gancao	SLC6A4	Mipax (Gancao)	0.310103
huanglian_001	Berberine	Huanglian	ABCC8	Berberine (Huanglian)	13817.4
huanglian_001	Berberine	Huanglian	ACHE	Berberine (Huanglian)	13817.4
huanglian_001	Berberine	Huanglian	ADRA2B	Berberine (Huanglian)	13817.4
huanglian_001	Berberine	Huanglian	ADRA2C	Berberine (Huanglian)	13817.4
huanglian_001	Berberine	Huanglian	AHR	Berberine (Huanglian)	13817.4
huanglian_001	Berberine	Huanglian	AR	Berberine (Huanglian)	13817.4
huanglian_001	Berberine	Huanglian	BCHE	Berberine (Huanglian)	13817.4
huanglian_001	Berberine	Huanglian	CHRM1	Berberine (Huanglian)	13817.4
huanglian_001	Berberine	Huanglian	CHRM4	Berberine (Huanglian)	13817.4
huanglian_001	Berberine	Huanglian	CYP3A4	Berberine (Huanglian)	13817.4
huanglian_001	Berberine	Huanglian	ESR1	Berberine (Huanglian)	13817.4
huanglian_001	Berberine	Huanglian	ESRRA	Berberine (Huanglian)	13817.4
huanglian_001	Berberine	Huanglian	GAPDH	Berberine (Huanglian)	13817.4
huanglian_001	Berberine	Huanglian	GLI3	Berberine (Huanglian)	13817.4
huanglian_001	Berberine	Huanglian	HCRTR1	Berberine (Huanglian)	13817.4
huanglian_001	Berberine	Huanglian	HTR2B	Berberine (Huanglian)	13817.4
huanglian_001	Berberine	Huanglian	KCNH2	Berberine (Huanglian)	13817.4
huanglian_001	Berberine	Huanglian	KCNJ11	Berberine (Huanglian)	13817.4
huanglian_001	Berberine	Huanglian	MAPT	Berberine (Huanglian)	13817.4
huanglian_001	Berberine	Huanglian	NFE2L2	Berberine (Huanglian)	13817.4
huanglian_001	Berberine	Huanglian	NR2F2	Berberine (Huanglian)	13817.4
huanglian_001	Berberine	Huanglian	PREP	Berberine (Huanglian)	13817.4
huanglian_001	Berberine	Huanglian	RAD52	Berberine (Huanglian)	13817.4
huanglian_001	Berberine	Huanglian	RAD54L	Berberine (Huanglian)	13817.4
huanglian_001	Berberine	Huanglian	SENP8	Berberine (Huanglian)	13817.4
huanglian_001	Berberine	Huanglian	SIGMAR1	Berberine (Huanglian)	13817.4
huanglian_001	Berberine	Huanglian	TDP1	Berberine (Huanglian)	13817.4
huanglian_001	Berberine	Huanglian	TERT	Berberine (Huanglian)	13817.4
huanglian_001	Berberine	Huanglian	TP53	Berberine (Huanglian)	13817.4
huanglian_001	Berberine	Huanglian	UHRF1	Berberine (Huanglian)	13817.4
huanglian_001	Berberine	Huanglian	HIF1A	Berberine (Huanglian)	13817.4
huanglian_003	Columbamine	Huanglian	CYP3A4	Columbamine (Huanglian)	0.249154
huanglian_006	Epiberberine	Huanglian	APAF1	Epiberberine (Huanglian)	2005.18
huanglian_006	Epiberberine	Huanglian	BCL2L1	Epiberberine (Huanglian)	2005.18
huanglian_006	Epiberberine	Huanglian	CTSL	Epiberberine (Huanglian)	2005.18
huanglian_006	Epiberberine	Huanglian	GAPDH	Epiberberine (Huanglian)	2005.18
huanglian_006	Epiberberine	Huanglian	GSTO1	Epiberberine (Huanglian)	2005.18
huanglian_006	Epiberberine	Huanglian	HCRTR1	Epiberberine (Huanglian)	2005.18
huanglian_006	Epiberberine	Huanglian	HOXA9	Epiberberine (Huanglian)	2005.18
huanglian_006	Epiberberine	Huanglian	JAK2	Epiberberine (Huanglian)	2005.18
huanglian_006	Epiberberine	Huanglian	MAPT	Epiberberine (Huanglian)	2005.18
huanglian_006	Epiberberine	Huanglian	MCL1	Epiberberine (Huanglian)	2005.18
huanglian_006	Epiberberine	Huanglian	MPI	Epiberberine (Huanglian)	2005.18
huanglian_006	Epiberberine	Huanglian	NPSR1	Epiberberine (Huanglian)	2005.18
huanglian_006	Epiberberine	Huanglian	POLB	Epiberberine (Huanglian)	2005.18
huanglian_006	Epiberberine	Huanglian	POLI	Epiberberine (Huanglian)	2005.18
huanglian_006	Epiberberine	Huanglian	PRMT1	Epiberberine (Huanglian)	2005.18
huanglian_006	Epiberberine	Huanglian	SAE1	Epiberberine (Huanglian)	2005.18
huanglian_006	Epiberberine	Huanglian	SENP6	Epiberberine (Huanglian)	2005.18
huanglian_006	Epiberberine	Huanglian	TDP2	Epiberberine (Huanglian)	2005.18
huanglian_006	Epiberberine	Huanglian	TNNC1	Epiberberine (Huanglian)	2005.18
huanglian_006	Epiberberine	Huanglian	TNNI3	Epiberberine (Huanglian)	2005.18
huanglian_006	Epiberberine	Huanglian	TNNT2	Epiberberine (Huanglian)	2005.18
huanglian_006	Epiberberine	Huanglian	TSG101	Epiberberine (Huanglian)	2005.18
huanglian_006	Epiberberine	Huanglian	UBA2	Epiberberine (Huanglian)	2005.18
huanglian_006	Epiberberine	Huanglian	UBE2I	Epiberberine (Huanglian)	2005.18
huanglian_006	Epiberberine	Huanglian	USP1	Epiberberine (Huanglian)	2005.18
huanglian_007	Ferulic acid	Huanglian	CA1	Ferulic acid (Huanglian)	0.475483
huanglian_007	Ferulic acid	Huanglian	CA12	Ferulic acid (Huanglian)	0.475483
huanglian_007	Ferulic acid	Huanglian	CA14	Ferulic acid (Huanglian)	0.475483
huanglian_007	Ferulic acid	Huanglian	CA2	Ferulic acid (Huanglian)	0.475483
huanglian_007	Ferulic acid	Huanglian	CA3	Ferulic acid (Huanglian)	0.475483
huanglian_007	Ferulic acid	Huanglian	CA4	Ferulic acid (Huanglian)	0.475483
huanglian_007	Ferulic acid	Huanglian	CA5A	Ferulic acid (Huanglian)	0.475483
huanglian_007	Ferulic acid	Huanglian	CA5B	Ferulic acid (Huanglian)	0.475483
huanglian_007	Ferulic acid	Huanglian	CA6	Ferulic acid (Huanglian)	0.475483
huanglian_007	Ferulic acid	Huanglian	CA7	Ferulic acid (Huanglian)	0.475483
huanglian_007	Ferulic acid	Huanglian	CA9	Ferulic acid (Huanglian)	0.475483
huanglian_007	Ferulic acid	Huanglian	CTRB1	Ferulic acid (Huanglian)	0.475483
huanglian_007	Ferulic acid	Huanglian	HYAL1	Ferulic acid (Huanglian)	0.475483
huanglian_007	Ferulic acid	Huanglian	PLAU	Ferulic acid (Huanglian)	0.475483
huanglian_008	Jatrorrhizine	Huanglian	CYP3A4	Jatrorrhizine (Huanglian)	3139.34
huanglian_008	Jatrorrhizine	Huanglian	HCRTR1	Jatrorrhizine (Huanglian)	3139.34
huanglian_008	Jatrorrhizine	Huanglian	RAD52	Jatrorrhizine (Huanglian)	3139.34
huanglian_008	Jatrorrhizine	Huanglian	RAD54L	Jatrorrhizine (Huanglian)	3139.34
huanglian_009	Limonin	Huanglian	CYP3A4	Limonin (Huanglian)	0.174913
huanglian_011	Obaculactone	Huanglian	CYP3A4	Obaculactone (Huanglian)	0.174913
huanglian_012	Palmatine	Huanglian	ACHE	Palmatine (Huanglian)	3988.82
huanglian_012	Palmatine	Huanglian	CYP3A4	Palmatine (Huanglian)	3988.82
MOL000114	vanillic acid	Huanglian	ADRA2A	vanillic acid (Huanglian)	0.464679
MOL000114	vanillic acid	Huanglian	MAOA	vanillic acid (Huanglian)	0.464679
MOL000114	vanillic acid	Huanglian	TPMT	vanillic acid (Huanglian)	0.464679
MOL000114	vanillic acid	Huanglian	ADRA2A	vanillic acid (Huanglian)	0.620811
MOL000114	vanillic acid	Huanglian	MAOA	vanillic acid (Huanglian)	0.620811
MOL000114	vanillic acid	Huanglian	TPMT	vanillic acid (Huanglian)	0.620811
MOL000141	hydroxytyrosol	Huanglian	ADRA1B	hydroxytyrosol (Huanglian)	0.325482
MOL000141	hydroxytyrosol	Huanglian	ADRA1D	hydroxytyrosol (Huanglian)	0.325482
MOL000141	hydroxytyrosol	Huanglian	ADRA2A	hydroxytyrosol (Huanglian)	0.325482
MOL000141	hydroxytyrosol	Huanglian	ADRA2B	hydroxytyrosol (Huanglian)	0.325482
MOL000141	hydroxytyrosol	Huanglian	ADRA2C	hydroxytyrosol (Huanglian)	0.325482
MOL000141	hydroxytyrosol	Huanglian	ADRB1	hydroxytyrosol (Huanglian)	0.325482
MOL000141	hydroxytyrosol	Huanglian	CTRB1	hydroxytyrosol (Huanglian)	0.325482
MOL000141	hydroxytyrosol	Huanglian	DRD1	hydroxytyrosol (Huanglian)	0.325482
MOL000141	hydroxytyrosol	Huanglian	GABRA6	hydroxytyrosol (Huanglian)	0.325482
MOL000141	hydroxytyrosol	Huanglian	GRIA2	hydroxytyrosol (Huanglian)	0.325482
MOL000141	hydroxytyrosol	Huanglian	MAOA	hydroxytyrosol (Huanglian)	0.325482
MOL000141	hydroxytyrosol	Huanglian	PLAU	hydroxytyrosol (Huanglian)	0.325482
MOL000141	hydroxytyrosol	Huanglian	PRSS3	hydroxytyrosol (Huanglian)	0.325482
MOL000622	Magnograndiolide	Huanglian	GABRA6	Magnograndiolide (Huanglian)	0.33164
MOL000622	Magnograndiolide	Huanglian	GRIA2	Magnograndiolide (Huanglian)	0.33164
MOL000771	p-coumaric acid	Huanglian	AKR1B1	p-coumaric acid (Huanglian)	0.342385
MOL000771	p-coumaric acid	Huanglian	AKR1B10	p-coumaric acid (Huanglian)	0.342385
MOL000771	p-coumaric acid	Huanglian	CA1	p-coumaric acid (Huanglian)	0.342385
MOL000771	p-coumaric acid	Huanglian	CA12	p-coumaric acid (Huanglian)	0.342385
MOL000771	p-coumaric acid	Huanglian	CA14	p-coumaric acid (Huanglian)	0.342385
MOL000771	p-coumaric acid	Huanglian	CA2	p-coumaric acid (Huanglian)	0.342385
MOL000771	p-coumaric acid	Huanglian	CA3	p-coumaric acid (Huanglian)	0.342385
MOL000771	p-coumaric acid	Huanglian	CA4	p-coumaric acid (Huanglian)	0.342385
MOL000771	p-coumaric acid	Huanglian	CA5A	p-coumaric acid (Huanglian)	0.342385
MOL000771	p-coumaric acid	Huanglian	CA5B	p-coumaric acid (Huanglian)	0.342385
MOL000771	p-coumaric acid	Huanglian	CA6	p-coumaric acid (Huanglian)	0.342385
MOL000771	p-coumaric acid	Huanglian	CA7	p-coumaric acid (Huanglian)	0.342385
MOL000771	p-coumaric acid	Huanglian	CA9	p-coumaric acid (Huanglian)	0.342385
MOL000771	p-coumaric acid	Huanglian	CTRB1	p-coumaric acid (Huanglian)	0.342385
MOL000771	p-coumaric acid	Huanglian	EGFR	p-coumaric acid (Huanglian)	0.342385
MOL000771	p-coumaric acid	Huanglian	HCAR2	p-coumaric acid (Huanglian)	0.342385
MOL000771	p-coumaric acid	Huanglian	PLA2G2E	p-coumaric acid (Huanglian)	0.342385
MOL000771	p-coumaric acid	Huanglian	PLG	p-coumaric acid (Huanglian)	0.342385
MOL000778	6-O-E-Feruloylajugol	Huanglian	CCNA2	6-O-E-Feruloylajugol (Huanglian)	0.0420858
MOL000778	6-O-E-Feruloylajugol	Huanglian	PRSS1	6-O-E-Feruloylajugol (Huanglian)	0.0420858
MOL000779	6-O-E-Feruloylajugol_qt	Huanglian	CCNA2	6-O-E-Feruloylajugol_qt (Huanglian)	0.0996925
MOL000779	6-O-E-Feruloylajugol_qt	Huanglian	PRSS1	6-O-E-Feruloylajugol_qt (Huanglian)	0.0996925
MOL001845	clemastanin B_qt	Huanglian	CALM1	clemastanin B_qt (Huanglian)	0.122539
MOL001867	Isovanillin	Huanglian	AOX1	Isovanillin (Huanglian)	0.444416
MOL001867	Isovanillin	Huanglian	CTRB1	Isovanillin (Huanglian)	0.444416
MOL001867	Isovanillin	Huanglian	XDH	Isovanillin (Huanglian)	0.444416
MOL001867	Isovanillin	Huanglian	AOX1	Isovanillin (Huanglian)	0.59374
MOL001867	Isovanillin	Huanglian	CTRB1	Isovanillin (Huanglian)	0.59374
MOL001867	Isovanillin	Huanglian	XDH	Isovanillin (Huanglian)	0.59374
MOL002343	tetrandrine	Huanglian	CDK4	tetrandrine (Huanglian)	0.0612369
MOL002343	tetrandrine	Huanglian	IFNG	tetrandrine (Huanglian)	0.0612369
MOL002343	tetrandrine	Huanglian	IL2	tetrandrine (Huanglian)	0.0612369
MOL002896	Corydaldine	Huanglian	PKIA	Corydaldine (Huanglian)	0.629654
MOL002903	(R)-Canadine	Huanglian	CALM1	(R)-Canadine (Huanglian)	0.065043
MOL002903	(R)-Canadine	Huanglian	DRD1	(R)-Canadine (Huanglian)	0.065043
MOL002903	(R)-Canadine	Huanglian	KCNMA1	(R)-Canadine (Huanglian)	0.065043
MOL002903	(R)-Canadine	Huanglian	PDE10A	(R)-Canadine (Huanglian)	0.065043
MOL002904	Berlambine	Huanglian	CALM1	Berlambine (Huanglian)	0.205679
MOL002904	Berlambine	Huanglian	KCNMA1	Berlambine (Huanglian)	0.205679
MOL002904	Berlambine	Huanglian	NCOA2	Berlambine (Huanglian)	0.205679
MOL002904	Berlambine	Huanglian	PRSS1	Berlambine (Huanglian)	0.205679
MOL002905	Zosimin	Huanglian	CALM1	Zosimin (Huanglian)	0.134497
MOL002905	Zosimin	Huanglian	PRSS1	Zosimin (Huanglian)	0.134497
MOL002907	Corchoroside A_qt	Huanglian	NCOA2	Corchoroside A_qt (Huanglian)	0.178657
MOL003178	GENOP	Huanglian	ALOX5	GENOP (Huanglian)	0.442819
MOL003178	GENOP	Huanglian	CA1	GENOP (Huanglian)	0.442819
MOL003178	GENOP	Huanglian	CA12	GENOP (Huanglian)	0.442819
MOL003178	GENOP	Huanglian	CA14	GENOP (Huanglian)	0.442819
MOL003178	GENOP	Huanglian	CA2	GENOP (Huanglian)	0.442819
MOL003178	GENOP	Huanglian	CA7	GENOP (Huanglian)	0.442819
MOL003178	GENOP	Huanglian	CA9	GENOP (Huanglian)	0.442819
MOL003178	GENOP	Huanglian	CTRB1	GENOP (Huanglian)	0.442819
MOL003178	GENOP	Huanglian	FUT7	GENOP (Huanglian)	0.442819
MOL003178	GENOP	Huanglian	PTPN1	GENOP (Huanglian)	0.442819
MOL004095	Cinnamic acid, 3,4-dimethoxy- (8CI)	Huanglian	PKIA	Cinnamic acid, 3,4-dimethoxy- (8CI) (Huanglian)	0.568841
MOL007134	danshensu	Huanglian	COL1A1	danshensu (Huanglian)	0.293757
MOL007134	danshensu	Huanglian	COL3A1	danshensu (Huanglian)	0.293757
MOL007134	danshensu	Huanglian	CTRB1	danshensu (Huanglian)	0.293757
MOL007134	danshensu	Huanglian	SOD1	danshensu (Huanglian)	0.293757
kushen_004	Cytisine	Kushen	CHRNA7	Cytisine (Kushen)	0.426466
kushen_006	Formononetin	Kushen	ATP5B	Formononetin (Kushen)	0.224021
kushen_006	Formononetin	Kushen	CALM1	Formononetin (Kushen)	0.224021
kushen_006	Formononetin	Kushen	CCNA2	Formononetin (Kushen)	0.224021
kushen_006	Formononetin	Kushen	ESR2	Formononetin (Kushen)	0.224021
kushen_006	Formononetin	Kushen	IL2	Formononetin (Kushen)	0.224021
kushen_006	Formononetin	Kushen	MT-ND6	Formononetin (Kushen)	0.224021
kushen_006	Formononetin	Kushen	PIM1	Formononetin (Kushen)	0.224021
kushen_006	Formononetin	Kushen	PKIA	Formononetin (Kushen)	0.224021
kushen_006	Formononetin	Kushen	PRSS1	Formononetin (Kushen)	0.224021
kushen_010	Isoanhydroicaritin	Kushen	CALM1	Isoanhydroicaritin (Kushen)	0.126451
kushen_010	Isoanhydroicaritin	Kushen	CCNA2	Isoanhydroicaritin (Kushen)	0.126451
kushen_010	Isoanhydroicaritin	Kushen	KCNMA1	Isoanhydroicaritin (Kushen)	0.126451
kushen_010	Isoanhydroicaritin	Kushen	NCOA2	Isoanhydroicaritin (Kushen)	0.126451
kushen_010	Isoanhydroicaritin	Kushen	PIM1	Isoanhydroicaritin (Kushen)	0.126451
kushen_010	Isoanhydroicaritin	Kushen	PRSS1	Isoanhydroicaritin (Kushen)	0.126451
kushen_014	Noranhydroicaritin	Kushen	CALM1	Noranhydroicaritin (Kushen)	0.114479
kushen_014	Noranhydroicaritin	Kushen	CCNA2	Noranhydroicaritin (Kushen)	0.114479
kushen_014	Noranhydroicaritin	Kushen	KCNMA1	Noranhydroicaritin (Kushen)	0.114479
kushen_014	Noranhydroicaritin	Kushen	NCOA2	Noranhydroicaritin (Kushen)	0.114479
kushen_014	Noranhydroicaritin	Kushen	PIM1	Noranhydroicaritin (Kushen)	0.114479
kushen_014	Noranhydroicaritin	Kushen	PRSS1	Noranhydroicaritin (Kushen)	0.114479
kushen_015	Isoxanthohumol	Kushen	CALM1	Isoxanthohumol (Kushen)	0.110221
kushen_015	Isoxanthohumol	Kushen	NCOA1	Isoxanthohumol (Kushen)	0.110221
kushen_015	Isoxanthohumol	Kushen	NCOA2	Isoxanthohumol (Kushen)	0.110221
kushen_025	Kuraridin	Kushen	CALM1	Kuraridin (Kushen)	0.0685234
kushen_025	Kuraridin	Kushen	CCNA2	Kuraridin (Kushen)	0.0685234
kushen_025	Kuraridin	Kushen	PIM1	Kuraridin (Kushen)	0.0685234
kushen_025	Kuraridin	Kushen	PTGS1	Kuraridin (Kushen)	0.0685234
kushen_027	Kurarinol	Kushen	BACE1	Kurarinol (Kushen)	0.0987405
kushen_027	Kurarinol	Kushen	CALM1	Kurarinol (Kushen)	0.0987405
kushen_032	Kushenol C	Kushen	PRSS1	Kushenol C (Kushen)	0.102807
kushen_035	Kushenol F	Kushen	CALM1	Kushenol F (Kushen)	0.0884784
kushen_036	Kushenol G	Kushen	PRSS1	Kushenol G (Kushen)	0.0987499
kushen_038	Kushenol I	Kushen	CALM1	Kushenol I (Kushen)	0.0958694
kushen_038	Kushenol I	Kushen	NCOA2	Kushenol I (Kushen)	0.0958694
kushen_043	Kushenol N	Kushen	CALM1	Kushenol N (Kushen)	0.0958694
kushen_043	Kushenol N	Kushen	NCOA2	Kushenol N (Kushen)	0.0958694
kushen_048	Leachianone A	Kushen	BACE1	Leachianone A (Kushen)	0.102797
kushen_048	Leachianone A	Kushen	CALM1	Leachianone A (Kushen)	0.102797
kushen_048	Leachianone A	Kushen	NCOA1	Leachianone A (Kushen)	0.102797
kushen_048	Leachianone A	Kushen	NCOA2	Leachianone A (Kushen)	0.102797
kushen_053	Matrine	Kushen	MMP2	Matrine (Kushen)	340.893
kushen_054	2'-Methoxykurarinone	Kushen	BACE1	2'-Methoxykurarinone (Kushen)	0.0896405
kushen_064	Sophocarpine	Kushen	SH2D1B	Sophocarpine (Kushen)	409.901
kushen_066	Sophoraflavanone G	Kushen	BACE1	Sophoraflavanone G (Kushen)	0.0955646
kushen_066	Sophoraflavanone G	Kushen	SLC5A1	Sophoraflavanone G (Kushen)	0.0955646
kushen_066	Sophoraflavanone G	Kushen	SLC5A2	Sophoraflavanone G (Kushen)	0.0955646
kushen_074	Sophoridine	Kushen	TOP1	Sophoridine (Kushen)	634.358
kushen_078	Xanthohumol	Kushen	ALOX5	Xanthohumol (Kushen)	0.097519
kushen_078	Xanthohumol	Kushen	LY96	Xanthohumol (Kushen)	0.097519
kushen_078	Xanthohumol	Kushen	PDPK1	Xanthohumol (Kushen)	0.097519
kushen_078	Xanthohumol	Kushen	PRKCA	Xanthohumol (Kushen)	0.097519
kushen_078	Xanthohumol	Kushen	PRKCQ	Xanthohumol (Kushen)	0.097519
kushen_078	Xanthohumol	Kushen	TXNRD3	Xanthohumol (Kushen)	0.097519
MOL000456	Phaseolin	Kushen	CALM1	Phaseolin (Kushen)	0.107212
MOL000456	Pterocarpine	Kushen	CALM1	Pterocarpine (Kushen)	0.107212
MOL000456	Phaseolin	Kushen	CCNA2	Phaseolin (Kushen)	0.107212
MOL000456	Pterocarpine	Kushen	CCNA2	Pterocarpine (Kushen)	0.107212
MOL000456	Phaseolin	Kushen	NCOA2	Phaseolin (Kushen)	0.107212
MOL000456	Pterocarpine	Kushen	NCOA2	Pterocarpine (Kushen)	0.107212
MOL000456	Phaseolin	Kushen	PIM1	Phaseolin (Kushen)	0.107212
MOL000456	Pterocarpine	Kushen	PIM1	Pterocarpine (Kushen)	0.107212
MOL000456	Phaseolin	Kushen	PRSS1	Phaseolin (Kushen)	0.107212
MOL000456	Pterocarpine	Kushen	PRSS1	Pterocarpine (Kushen)	0.107212
MOL000456	Phaseolin	Kushen	RXRB	Phaseolin (Kushen)	0.107212
MOL000456	Pterocarpine	Kushen	RXRB	Pterocarpine (Kushen)	0.107212
MOL000657	Kushenol E	Kushen	CALM1	Kushenol E (Kushen)	0.106194
MOL001484	Inermine	Kushen	CALM1	Inermine (Kushen)	0.0847488
MOL001484	Inermine	Kushen	IGHG1	Inermine (Kushen)	0.0847488
MOL001484	Inermine	Kushen	PRSS1	Inermine (Kushen)	0.0847488
MOL001484	Inermine	Kushen	CALM1	Inermine (Kushen)	0.12687
MOL001484	Inermine	Kushen	IGHG1	Inermine (Kushen)	0.12687
MOL001484	Inermine	Kushen	PRSS1	Inermine (Kushen)	0.12687
MOL003347	hyperforin	Kushen	CYP3A4	hyperforin (Kushen)	0.0811756
MOL003673	Wighteone	Kushen	CALM1	Wighteone (Kushen)	0.128782
MOL003673	Wighteone	Kushen	CCNA2	Wighteone (Kushen)	0.128782
MOL003673	Wighteone	Kushen	PIM1	Wighteone (Kushen)	0.128782
MOL003673	Wighteone	Kushen	PRSS1	Wighteone (Kushen)	0.128782
MOL004941	(2R)-7-hydroxy-2-(4-hydroxyphenyl)chroman-4-one	Kushen	CALM1	(2R)-7-hydroxy-2-(4-hydroxyphenyl)chroman-4-one (Kushen)	0.0940124
MOL004941	(2R)-7-hydroxy-2-(4-hydroxyphenyl)chroman-4-one	Kushen	PKIA	(2R)-7-hydroxy-2-(4-hydroxyphenyl)chroman-4-one (Kushen)	0.0940124
MOL004941	(2R)-7-hydroxy-2-(4-hydroxyphenyl)chroman-4-one	Kushen	CALM1	(2R)-7-hydroxy-2-(4-hydroxyphenyl)chroman-4-one (Kushen)	0.140737
MOL004941	(2R)-7-hydroxy-2-(4-hydroxyphenyl)chroman-4-one	Kushen	PKIA	(2R)-7-hydroxy-2-(4-hydroxyphenyl)chroman-4-one (Kushen)	0.140737
MOL006574	2-Hydroxychalcone	Kushen	BACE1	2-Hydroxychalcone (Kushen)	0.314884
MOL006574	2-Hydroxychalcone	Kushen	BCHE	2-Hydroxychalcone (Kushen)	0.314884
MOL006574	2-Hydroxychalcone	Kushen	PKIA	2-Hydroxychalcone (Kushen)	0.314884
MOL006591	Thc-9-cooh	Kushen	NCOA1	Thc-9-cooh (Kushen)	0.0964105
MOL006595	(2R)-flavanone	Kushen	PIM1	(2R)-flavanone (Kushen)	0.201012
MOL006595	(2R)-flavanone	Kushen	PKIA	(2R)-flavanone (Kushen)	0.201012
MOL006595	(2R)-flavanone	Kushen	SCN10A	(2R)-flavanone (Kushen)	0.201012
MOL006596	Glyceollin	Kushen	CALM1	Glyceollin (Kushen)	0.111002
MOL006596	Glyceollin	Kushen	CCNA2	Glyceollin (Kushen)	0.111002
MOL006596	Glyceollin	Kushen	KCNMA1	Glyceollin (Kushen)	0.111002
MOL006596	Glyceollin	Kushen	NCOA1	Glyceollin (Kushen)	0.111002
MOL006596	Glyceollin	Kushen	NCOA2	Glyceollin (Kushen)	0.111002
MOL006596	Glyceollin	Kushen	PIM1	Glyceollin (Kushen)	0.111002
MOL006596	Glyceollin	Kushen	PRSS1	Glyceollin (Kushen)	0.111002
MOL006600	1-[2,4-dihydroxy-3-(3-methylbut-2-enyl)phenyl]-3-phenylprop-2-en-1-one	Kushen	CALM1	1-[2,4-dihydroxy-3-(3-methylbut-2-enyl)phenyl]-3-phenylprop-2-en-1-one (Kushen)	0.141303
MOL006600	1-[2,4-dihydroxy-3-(3-methylbut-2-enyl)phenyl]-3-phenylprop-2-en-1-one	Kushen	CCNA2	1-[2,4-dihydroxy-3-(3-methylbut-2-enyl)phenyl]-3-phenylprop-2-en-1-one (Kushen)	0.141303
MOL006600	1-[2,4-dihydroxy-3-(3-methylbut-2-enyl)phenyl]-3-phenylprop-2-en-1-one	Kushen	PIM1	1-[2,4-dihydroxy-3-(3-methylbut-2-enyl)phenyl]-3-phenylprop-2-en-1-one (Kushen)	0.141303
MOL006602	isokurarinone	Kushen	CALM1	isokurarinone (Kushen)	0.0788127
MOL006602	isokurarinone	Kushen	NCOA2	isokurarinone (Kushen)	0.0788127
MOL006603	(E)-1-(2,6-dihydroxyphenyl)-3-(4-hydroxyphenyl)prop-2-en-1-one	Kushen	CCNA2	(E)-1-(2,6-dihydroxyphenyl)-3-(4-hydroxyphenyl)prop-2-en-1-one (Kushen)	0.158304
MOL006606	kosamol,r	Kushen	CALM1	kosamol,r (Kushen)	0.096709
MOL006606	kosamol,r	Kushen	NCOA2	kosamol,r (Kushen)	0.096709
MOL006607	kurarainone	Kushen	CALM1	kurarainone (Kushen)	0.0925078
MOL006612	kurarinone	Kushen	CALM1	kurarinone (Kushen)	0.0920215
MOL006612	kurarinone	Kushen	CCNA2	kurarinone (Kushen)	0.0920215
MOL006612	kurarinone	Kushen	NCOA2	kurarinone (Kushen)	0.0920215
MOL006612	kurarinone	Kushen	PIM1	kurarinone (Kushen)	0.0920215
MOL006613	kushenin	Kushen	CALM1	kushenin (Kushen)	0.136447
MOL006613	kushenin	Kushen	NCOA1	kushenin (Kushen)	0.136447
MOL006613	kushenin	Kushen	PRSS1	kushenin (Kushen)	0.136447
MOL006614	kushenol A	Kushen	BACE1	kushenol A (Kushen)	0.121373
MOL006614	kushenol A	Kushen	CALM1	kushenol A (Kushen)	0.121373
MOL006614	kushenol A	Kushen	KCNMA1	kushenol A (Kushen)	0.121373
MOL006614	kushenol A	Kushen	NCOA1	kushenol A (Kushen)	0.121373
MOL006616	kushenol D	Kushen	CALM1	kushenol D (Kushen)	0.063076
MOL006616	kushenol D	Kushen	CCNA2	kushenol D (Kushen)	0.063076
MOL006616	kushenol D	Kushen	NCOA2	kushenol D (Kushen)	0.063076
MOL006616	kushenol D	Kushen	PIM1	kushenol D (Kushen)	0.063076
MOL006620	kushenol J_qt	Kushen	CALM1	kushenol J_qt (Kushen)	0.0839841
MOL006626	leachianone,g	Kushen	NCOA1	leachianone,g (Kushen)	0.139123
MOL006640	sokurarinone	Kushen	CALM1	sokurarinone (Kushen)	0.0733662
MOL006640	sokurarinone	Kushen	NCOA2	sokurarinone (Kushen)	0.0733662
MOL006641	sophoraflavanone,g	Kushen	CCNA2	sophoraflavanone,g (Kushen)	0.080535
MOL006641	sophoraflavanone,g	Kushen	PIM1	sophoraflavanone,g (Kushen)	0.080535
MOL006647	sophoraisoflavanone,a	Kushen	CALM1	sophoraisoflavanone,a (Kushen)	0.109359
MOL006647	sophoraisoflavanone,a	Kushen	CCNA2	sophoraisoflavanone,a (Kushen)	0.109359
MOL006647	sophoraisoflavanone,a	Kushen	NCOA2	sophoraisoflavanone,a (Kushen)	0.109359
MOL006647	sophoraisoflavanone,a	Kushen	PIM1	sophoraisoflavanone,a (Kushen)	0.109359
MOL006647	sophoraisoflavanone,a	Kushen	PRSS1	sophoraisoflavanone,a (Kushen)	0.109359
MOL006653	xanthohumol	Kushen	CALM1	xanthohumol (Kushen)	0.0815595
MOL006653	xanthohumol	Kushen	CCNA2	xanthohumol (Kushen)	0.0815595
MOL006653	xanthohumol	Kushen	PIM1	xanthohumol (Kushen)	0.0815595
lianzixin_002	Isoliensinine	Lianzixin	AKR1B1	Isoliensinine (Lianzixin)	30.3517
lianzixin_002	Isoliensinine	Lianzixin	PDGFRB	Isoliensinine (Lianzixin)	30.3517
lianzixin_003	Liensinine	Lianzixin	SCN5A	Liensinine (Lianzixin)	46.904
lianzixin_003	Liensinine	Lianzixin	KCNH2	Liensinine (Lianzixin)	46.904
lianzixin_005	1-Methyl-corypalline	Lianzixin	PKIA	1-Methyl-corypalline (Lianzixin)	0.0426242
lianzixin_006	O-Methyl-corypalline	Lianzixin	MAOA	O-Methyl-corypalline (Lianzixin)	0.0608929
lianzixin_006	O-Methyl-corypalline	Lianzixin	MAOB	O-Methyl-corypalline (Lianzixin)	0.0608929
lianzixin_006	O-Methyl-corypalline	Lianzixin	SCN10A	O-Methyl-corypalline (Lianzixin)	0.0608929
lianzixin_006	O-Methyl-corypalline	Lianzixin	SLC6A2	O-Methyl-corypalline (Lianzixin)	0.0608929
lianzixin_006	O-Methyl-corypalline	Lianzixin	SLC6A3	O-Methyl-corypalline (Lianzixin)	0.0608929
lianzixin_006	O-Methyl-corypalline	Lianzixin	SLC6A4	O-Methyl-corypalline (Lianzixin)	0.0608929
lianzixin_008	Neferine	Lianzixin	KCNH2	Neferine (Lianzixin)	76.7936
lianzixin_010	Pronuciferine	Lianzixin	CALM1	Pronuciferine (Lianzixin)	0.0226985
lianzixin_010	Pronuciferine	Lianzixin	CCNA2	Pronuciferine (Lianzixin)	0.0226985
lianzixin_010	Pronuciferine	Lianzixin	NCOA2	Pronuciferine (Lianzixin)	0.0226985
lianzixin_010	Pronuciferine	Lianzixin	PIM1	Pronuciferine (Lianzixin)	0.0226985
lianzixin_010	Pronuciferine	Lianzixin	PRSS1	Pronuciferine (Lianzixin)	0.0226985
lianzixin_010	Pronuciferine	Lianzixin	RXRB	Pronuciferine (Lianzixin)	0.0226985
MOL007206	Armepavine	Lianzixin	CALM1	Armepavine (Lianzixin)	0.0193331
MOL009156	4'-methyl-N-methylcoclaurine	Lianzixin	CALM1	4'-methyl-N-methylcoclaurine (Lianzixin)	0.0288576
MOL009156	4'-methyl-N-methylcoclaurine	Lianzixin	DRD4	4'-methyl-N-methylcoclaurine (Lianzixin)	0.0288576
MOL009159	3,5,7-trihydroxy-2-(3-hydroxy-4-methoxy-phenyl)-6,8-dimethoxy-chromone	Lianzixin	CALM1	3,5,7-trihydroxy-2-(3-hydroxy-4-methoxy-phenyl)-6,8-dimethoxy-chromone (Lianzixin)	0.0295151
MOL009159	3,5,7-trihydroxy-2-(3-hydroxy-4-methoxy-phenyl)-6,8-dimethoxy-chromone	Lianzixin	NCOA2	3,5,7-trihydroxy-2-(3-hydroxy-4-methoxy-phenyl)-6,8-dimethoxy-chromone (Lianzixin)	0.0295151
MOL009159	3,5,7-trihydroxy-2-(3-hydroxy-4-methoxy-phenyl)-6,8-dimethoxy-chromone	Lianzixin	PRSS1	3,5,7-trihydroxy-2-(3-hydroxy-4-methoxy-phenyl)-6,8-dimethoxy-chromone (Lianzixin)	0.0295151
MOL009160	Loureirin A	Lianzixin	CALM1	Loureirin A (Lianzixin)	0.0246845
MOL009160	Loureirin A	Lianzixin	CCNA2	Loureirin A (Lianzixin)	0.0246845
MOL009160	Loureirin A	Lianzixin	PIM1	Loureirin A (Lianzixin)	0.0246845
MOL009166	anonaine	Lianzixin	DDC	anonaine (Lianzixin)	0.0352046
MOL009166	anonaine	Lianzixin	PTPRCAP	anonaine (Lianzixin)	0.0352046
MOL009166	anonaine	Lianzixin	TH	anonaine (Lianzixin)	0.0352046
MOL009167	(1R)-6,7-dimethoxy-1-(4-methoxybenzyl)-2-methyl-3,4-dihydro-1H-isoquinoline	Lianzixin	CALM1	(1R)-6,7-dimethoxy-1-(4-methoxybenzyl)-2-methyl-3,4-dihydro-1H-isoquinoline (Lianzixin)	0.0285263
maidong_016	Oleanolic acid	Maidong	ACP1	Oleanolic acid (Maidong)	0.125026
maidong_016	Oleanolic acid	Maidong	AKR1B1	Oleanolic acid (Maidong)	0.125026
maidong_016	Oleanolic acid	Maidong	AKR1B10	Oleanolic acid (Maidong)	0.125026
maidong_016	Oleanolic acid	Maidong	CALM1	Oleanolic acid (Maidong)	0.125026
maidong_016	Oleanolic acid	Maidong	GPBAR1	Oleanolic acid (Maidong)	0.125026
maidong_016	Oleanolic acid	Maidong	HMOX1	Oleanolic acid (Maidong)	0.125026
maidong_016	Oleanolic acid	Maidong	NOS2	Oleanolic acid (Maidong)	0.125026
maidong_016	Oleanolic acid	Maidong	NQO1	Oleanolic acid (Maidong)	0.125026
maidong_016	Oleanolic acid	Maidong	PKIA	Oleanolic acid (Maidong)	0.125026
maidong_016	Oleanolic acid	Maidong	PLA2G1B	Oleanolic acid (Maidong)	0.125026
maidong_016	Oleanolic acid	Maidong	POLB	Oleanolic acid (Maidong)	0.125026
maidong_016	Oleanolic acid	Maidong	PTGS1	Oleanolic acid (Maidong)	0.125026
maidong_016	Oleanolic acid	Maidong	PTGS2	Oleanolic acid (Maidong)	0.125026
maidong_016	Oleanolic acid	Maidong	PTPN1	Oleanolic acid (Maidong)	0.125026
maidong_016	Oleanolic acid	Maidong	PTPN11	Oleanolic acid (Maidong)	0.125026
maidong_016	Oleanolic acid	Maidong	PTPN2	Oleanolic acid (Maidong)	0.125026
maidong_016	Oleanolic acid	Maidong	PTPN6	Oleanolic acid (Maidong)	0.125026
maidong_016	Oleanolic acid	Maidong	PTPRF	Oleanolic acid (Maidong)	0.125026
MOL000107	quercertin,3-o-beta-d-glucopyranoside	Qinghao	F10	quercertin,3-o-beta-d-glucopyranoside (Qinghao)	0.0614682
MOL000107	quercertin,3-o-beta-d-glucopyranoside	Qinghao	TOP2A	quercertin,3-o-beta-d-glucopyranoside (Qinghao)	0.0614682
MOL000109	quercetin,3-o-glucoside	Qinghao	F10	quercetin,3-o-glucoside (Qinghao)	0.0614682
MOL000109	quercetin,3-o-glucoside	Qinghao	PRSS1	quercetin,3-o-glucoside (Qinghao)	0.0614682
MOL000109	quercetin,3-o-glucoside	Qinghao	TOP2A	quercetin,3-o-glucoside (Qinghao)	0.0614682
MOL000112	quercetin-3-o-galactopyranoside	Qinghao	ACHE	quercetin-3-o-galactopyranoside (Qinghao)	0.0614682
MOL000112	quercetin-3-o-galactopyranoside	Qinghao	F10	quercetin-3-o-galactopyranoside (Qinghao)	0.0614682
MOL000112	quercetin-3-o-galactopyranoside	Qinghao	NCOA2	quercetin-3-o-galactopyranoside (Qinghao)	0.0614682
MOL000112	quercetin-3-o-galactopyranoside	Qinghao	NOS2	quercetin-3-o-galactopyranoside (Qinghao)	0.0614682
MOL000112	quercetin-3-o-galactopyranoside	Qinghao	PIK3CG	quercetin-3-o-galactopyranoside (Qinghao)	0.0614682
MOL000112	quercetin-3-o-galactopyranoside	Qinghao	PRSS1	quercetin-3-o-galactopyranoside (Qinghao)	0.0614682
MOL000112	quercetin-3-o-galactopyranoside	Qinghao	PTPN1	quercetin-3-o-galactopyranoside (Qinghao)	0.0614682
MOL000112	quercetin-3-o-galactopyranoside	Qinghao	RHO	quercetin-3-o-galactopyranoside (Qinghao)	0.0614682
MOL000112	quercetin-3-o-galactopyranoside	Qinghao	TOP2A	quercetin-3-o-galactopyranoside (Qinghao)	0.0614682
MOL000122	1,8-cineole	Qinghao	CHRNA2	1,8-cineole (Qinghao)	0.564979
MOL000122	1,8-cineole	Qinghao	GABRA5	1,8-cineole (Qinghao)	0.564979
MOL000196	L-Bornyl acetate	Qinghao	ADRA2A	L-Bornyl acetate (Qinghao)	0.260249
MOL000196	L-Bornyl acetate	Qinghao	CHRNA2	L-Bornyl acetate (Qinghao)	0.260249
MOL000196	L-Bornyl acetate	Qinghao	DRD1	L-Bornyl acetate (Qinghao)	0.260249
MOL000196	L-Bornyl acetate	Qinghao	GABRA4	L-Bornyl acetate (Qinghao)	0.260249
MOL000196	L-Bornyl acetate	Qinghao	GABRA6	L-Bornyl acetate (Qinghao)	0.260249
MOL000196	L-Bornyl acetate	Qinghao	GRIA2	L-Bornyl acetate (Qinghao)	0.260249
MOL000196	L-Bornyl acetate	Qinghao	TOP2A	L-Bornyl acetate (Qinghao)	0.260249
MOL000198	(R)-linalool	Qinghao	F10	(R)-linalool (Qinghao)	0.311673
MOL000198	(R)-linalool	Qinghao	GABRA6	(R)-linalool (Qinghao)	0.311673
MOL000198	(R)-linalool	Qinghao	KCNH2	(R)-linalool (Qinghao)	0.311673
MOL000198	(R)-linalool	Qinghao	KCNMA1	(R)-linalool (Qinghao)	0.311673
MOL000198	(R)-linalool	Qinghao	KDR	(R)-linalool (Qinghao)	0.311673
MOL000198	(R)-linalool	Qinghao	NCOA2	(R)-linalool (Qinghao)	0.311673
MOL000204	cis-.beta.-Elemene diastereomer	Qinghao	GABRA6	cis-.beta.-Elemene diastereomer (Qinghao)	0.272058
MOL000204	cis-.beta.-Elemene diastereomer	Qinghao	NCOA2	cis-.beta.-Elemene diastereomer (Qinghao)	0.272058
MOL000270	CHEBI:7	Qinghao	CALM1	CHEBI:7 (Qinghao)	0.617611
MOL000270	CHEBI:7	Qinghao	CALM1	CHEBI:7 (Qinghao)	0.617611
MOL000270	CHEBI:7	Qinghao	CHRM4	CHEBI:7 (Qinghao)	0.617611
MOL000270	CHEBI:7	Qinghao	CHRM4	CHEBI:7 (Qinghao)	0.617611
MOL000270	CHEBI:7	Qinghao	NCOA2	CHEBI:7 (Qinghao)	0.617611
MOL000270	CHEBI:7	Qinghao	NCOA2	CHEBI:7 (Qinghao)	0.617611
MOL000359	sitosterol	Qinghao	NCOA2	sitosterol (Qinghao)	0.0895516
MOL000359	sitosterol	Qinghao	NCOA2	sitosterol (Qinghao)	0.134059
MOL000359	sitosterol	Qinghao	NCOA2	sitosterol (Qinghao)	0.134059
MOL000473	(-)-trans-Carveol	Qinghao	REN	(-)-trans-Carveol (Qinghao)	0.394767
MOL000608	()-Terpinen-4-ol	Qinghao	GABRA6	()-Terpinen-4-ol (Qinghao)	0.42861
MOL000608	()-Terpinen-4-ol	Qinghao	IGHG1	()-Terpinen-4-ol (Qinghao)	0.42861
MOL000696	β-terpineol	Qinghao	GABRA6	β-terpineol (Qinghao)	0.379858
MOL000696	β-terpineol	Qinghao	IGHG1	β-terpineol (Qinghao)	0.379858
MOL001103	[(3R)-3,7-dimethylocta-1,6-dien-3-yl] acetate	Qinghao	GABRA6	[(3R)-3,7-dimethylocta-1,6-dien-3-yl] acetate (Qinghao)	0.206667
MOL001103	[(3R)-3,7-dimethylocta-1,6-dien-3-yl] acetate	Qinghao	IGHG1	[(3R)-3,7-dimethylocta-1,6-dien-3-yl] acetate (Qinghao)	0.206667
MOL001103	[(3R)-3,7-dimethylocta-1,6-dien-3-yl] acetate	Qinghao	PRSS1	[(3R)-3,7-dimethylocta-1,6-dien-3-yl] acetate (Qinghao)	0.206667
MOL002841	l-alpha-Fenchone	Qinghao	GABRA6	l-alpha-Fenchone (Qinghao)	0.503373
MOL003837	esculetin	Qinghao	AKR1B1	esculetin (Qinghao)	0.379568
MOL003837	esculetin	Qinghao	BACE1	esculetin (Qinghao)	0.379568
MOL003837	esculetin	Qinghao	CDK4	esculetin (Qinghao)	0.379568
MOL003837	esculetin	Qinghao	MMP1	esculetin (Qinghao)	0.379568
MOL003837	esculetin	Qinghao	MMP3	esculetin (Qinghao)	0.379568
MOL003837	esculetin	Qinghao	MPI	esculetin (Qinghao)	0.379568
MOL003837	esculetin	Qinghao	PTGS1	esculetin (Qinghao)	0.379568
MOL003837	esculetin	Qinghao	RB1	esculetin (Qinghao)	0.379568
MOL003837	esculetin	Qinghao	SORD	esculetin (Qinghao)	0.379568
MOL003837	esculetin	Qinghao	XDH	esculetin (Qinghao)	0.379568
MOL003951	Benzyl isovalerate	Qinghao	PKIA	Benzyl isovalerate (Qinghao)	0.226647
MOL004368	Hyperin	Qinghao	NCOA2	Hyperin (Qinghao)	0.0103267
MOL004368	Hyperin	Qinghao	PRSS1	Hyperin (Qinghao)	0.0103267
MOL004368	Hyperin	Qinghao	NCOA2	Hyperin (Qinghao)	0.0614682
MOL004368	Hyperin	Qinghao	PRSS1	Hyperin (Qinghao)	0.0614682
MOL007392	Deoxyarteannuin B	Qinghao	GABRA6	Deoxyarteannuin B (Qinghao)	0.291052
MOL007392	Deoxyarteannuin B	Qinghao	GRIA2	Deoxyarteannuin B (Qinghao)	0.291052
MOL007411	isoartemisia ketone	Qinghao	GABRA6	isoartemisia ketone (Qinghao)	0.305989
MOL007415	[(2S)-2-[[(2S)-2-(benzoylamino)-3-phenylpropanoyl]amino]-3-phenylpropyl] acetate	Qinghao	PRSS1	[(2S)-2-[[(2S)-2-(benzoylamino)-3-phenylpropanoyl]amino]-3-phenylpropyl] acetate (Qinghao)	0.125068
MOL007419	eupatorin_qt	Qinghao	NCOA2	eupatorin_qt (Qinghao)	0.188716
MOL007420	gamma-Terpineol	Qinghao	IGHG1	gamma-Terpineol (Qinghao)	0.389608
MOL007421	Quercetagetin-3,4'-dimethyl ether	Qinghao	PRSS1	Quercetagetin-3,4'-dimethyl ether (Qinghao)	0.199574
MOL007431	qinghaosu i	Qinghao	GABRA6	qinghaosu i (Qinghao)	0.356903
MOL007431	qinghaosu i	Qinghao	GRIA2	qinghaosu i (Qinghao)	0.356903
MOL007447	2-(3,5-dihydroxy-4-methoxy-phenyl)-3,5,7-trihydroxy-chromone	Qinghao	NCOA2	2-(3,5-dihydroxy-4-methoxy-phenyl)-3,5,7-trihydroxy-chromone (Qinghao)	0.149218
MOL007447	2-(3,5-dihydroxy-4-methoxy-phenyl)-3,5,7-trihydroxy-chromone	Qinghao	PRSS1	2-(3,5-dihydroxy-4-methoxy-phenyl)-3,5,7-trihydroxy-chromone (Qinghao)	0.149218
MOL007448	trans-Pinocarveyl acetate	Qinghao	GABRA4	trans-Pinocarveyl acetate (Qinghao)	0.293917
MOL007448	trans-Pinocarveyl acetate	Qinghao	GABRA6	trans-Pinocarveyl acetate (Qinghao)	0.293917
MOL007448	trans-Pinocarveyl acetate	Qinghao	GRIA2	trans-Pinocarveyl acetate (Qinghao)	0.293917
qinghao_001	Acetylborneol	Qinghao	GABRA6	Acetylborneol (Qinghao)	0.260249
qinghao_001	Acetylborneol	Qinghao	GRIA2	Acetylborneol (Qinghao)	0.260249
qinghao_006	Areapillin	Qinghao	CALM1	Areapillin (Qinghao)	0.16679
qinghao_006	Areapillin	Qinghao	IGHG1	Areapillin (Qinghao)	0.16679
qinghao_006	Areapillin	Qinghao	NCOA1	Areapillin (Qinghao)	0.16679
qinghao_006	Areapillin	Qinghao	NCOA2	Areapillin (Qinghao)	0.16679
qinghao_006	Areapillin	Qinghao	PRSS1	Areapillin (Qinghao)	0.16679
qinghao_009	artemisinin	Qinghao	ABCB1	artemisinin (Qinghao)	2584.2
qinghao_009	artemisinin	Qinghao	CYP2B6	artemisinin (Qinghao)	2584.2
qinghao_009	artemisinin	Qinghao	CYP3A4	artemisinin (Qinghao)	2584.2
qinghao_009	artemisinin	Qinghao	DRD2	artemisinin (Qinghao)	2584.2
qinghao_009	artemisinin	Qinghao	GSTA1	artemisinin (Qinghao)	2584.2
qinghao_009	artemisinin	Qinghao	HOXA9	artemisinin (Qinghao)	2584.2
qinghao_009	artemisinin	Qinghao	NR1I2	artemisinin (Qinghao)	2584.2
qinghao_009	artemisinin	Qinghao	TARDBP	artemisinin (Qinghao)	2584.2
qinghao_009	artemisinin	Qinghao	TDP1	artemisinin (Qinghao)	2584.2
qinghao_010	Arteannuin B	Qinghao	ATAD5	Arteannuin B (Qinghao)	12.7491
qinghao_010	Arteannuin B	Qinghao	ATXN2	Arteannuin B (Qinghao)	12.7491
qinghao_010	Arteannuin B	Qinghao	CFTR	Arteannuin B (Qinghao)	12.7491
qinghao_010	Arteannuin B	Qinghao	GLP1R	Arteannuin B (Qinghao)	12.7491
qinghao_010	Arteannuin B	Qinghao	GMNN	Arteannuin B (Qinghao)	12.7491
qinghao_010	Arteannuin B	Qinghao	IDH1	Arteannuin B (Qinghao)	12.7491
qinghao_010	Arteannuin B	Qinghao	IL1B	Arteannuin B (Qinghao)	12.7491
qinghao_010	Arteannuin B	Qinghao	MDM2	Arteannuin B (Qinghao)	12.7491
qinghao_010	Arteannuin B	Qinghao	MDM4	Arteannuin B (Qinghao)	12.7491
qinghao_010	Arteannuin B	Qinghao	MITF	Arteannuin B (Qinghao)	12.7491
qinghao_010	Arteannuin B	Qinghao	NFE2L2	Arteannuin B (Qinghao)	12.7491
qinghao_010	Arteannuin B	Qinghao	PTH1R	Arteannuin B (Qinghao)	12.7491
qinghao_010	Arteannuin B	Qinghao	SMAD3	Arteannuin B (Qinghao)	12.7491
qinghao_010	Arteannuin B	Qinghao	SMPD1	Arteannuin B (Qinghao)	12.7491
qinghao_010	Arteannuin B	Qinghao	TDP1	Arteannuin B (Qinghao)	12.7491
qinghao_010	Arteannuin B	Qinghao	TNNC1	Arteannuin B (Qinghao)	12.7491
qinghao_010	Arteannuin B	Qinghao	TNNI3	Arteannuin B (Qinghao)	12.7491
qinghao_010	Arteannuin B	Qinghao	TNNT2	Arteannuin B (Qinghao)	12.7491
qinghao_013	Artemisetin	Qinghao	CALM1	Artemisetin (Qinghao)	0.185696
qinghao_013	Artemisetin	Qinghao	KCNMA1	Artemisetin (Qinghao)	0.185696
qinghao_013	Artemisetin	Qinghao	NCOA2	Artemisetin (Qinghao)	0.185696
qinghao_013	Artemisetin	Qinghao	PRSS1	Artemisetin (Qinghao)	0.185696
qinghao_015	Artemisia ketone	Qinghao	GABRA6	Artemisia ketone (Qinghao)	0.266471
qinghao_020	Astragalin	Qinghao	ACHE	Astragalin (Qinghao)	0.0536221
qinghao_020	Astragalin	Qinghao	CALM1	Astragalin (Qinghao)	0.0536221
qinghao_020	Astragalin	Qinghao	KDR	Astragalin (Qinghao)	0.0536221
qinghao_020	Astragalin	Qinghao	NCOA2	Astragalin (Qinghao)	0.0536221
qinghao_020	Astragalin	Qinghao	PRSS1	Astragalin (Qinghao)	0.0536221
qinghao_020	Astragalin	Qinghao	PTPN1	Astragalin (Qinghao)	0.0536221
qinghao_021	Axillarin	Qinghao	NCOA2	Axillarin (Qinghao)	0.177889
qinghao_021	Axillarin	Qinghao	PRSS1	Axillarin (Qinghao)	0.177889
qinghao_021	Axillarin	Qinghao	XDH	Axillarin (Qinghao)	0.177889
qinghao_030	Camphene	Qinghao	CALM1	Camphene (Qinghao)	0.485288
qinghao_030	Camphene	Qinghao	F10	Camphene (Qinghao)	0.485288
qinghao_030	Camphene	Qinghao	GABRA1	Camphene (Qinghao)	0.485288
qinghao_030	Camphene	Qinghao	GABRA2	Camphene (Qinghao)	0.485288
qinghao_030	Camphene	Qinghao	KCNH2	Camphene (Qinghao)	0.485288
qinghao_030	Camphene	Qinghao	KCNMA1	Camphene (Qinghao)	0.485288
qinghao_030	Camphene	Qinghao	NCOA2	Camphene (Qinghao)	0.485288
qinghao_030	Camphene	Qinghao	PTGS2	Camphene (Qinghao)	0.485288
qinghao_030	Camphene	Qinghao	SCN5A	Camphene (Qinghao)	0.485288
qinghao_030	Camphene	Qinghao	TOP2A	Camphene (Qinghao)	0.485288
qinghao_039	Chrysoeriol	Qinghao	ABCC1	Chrysoeriol (Qinghao)	0.150128
qinghao_039	Chrysoeriol	Qinghao	ABCC2	Chrysoeriol (Qinghao)	0.150128
qinghao_039	Chrysoeriol	Qinghao	AURKB	Chrysoeriol (Qinghao)	0.150128
qinghao_039	Chrysoeriol	Qinghao	CYP1A1	Chrysoeriol (Qinghao)	0.150128
qinghao_039	Chrysoeriol	Qinghao	CYP1B1	Chrysoeriol (Qinghao)	0.150128
qinghao_039	Chrysoeriol	Qinghao	GSTM1	Chrysoeriol (Qinghao)	0.150128
qinghao_039	Chrysoeriol	Qinghao	MAPK14	Chrysoeriol (Qinghao)	0.150128
qinghao_040	Chrysosplenol D	Qinghao	CALM1	Chrysosplenol D (Qinghao)	0.18766
qinghao_040	Chrysosplenol D	Qinghao	NCOA2	Chrysosplenol D (Qinghao)	0.18766
qinghao_040	Chrysosplenol D	Qinghao	PRSS1	Chrysosplenol D (Qinghao)	0.18766
qinghao_041	Cinaroside	Qinghao	ACHE	Cinaroside (Qinghao)	0.0569764
qinghao_041	Cinaroside	Qinghao	IL2	Cinaroside (Qinghao)	0.0569764
qinghao_041	Cinaroside	Qinghao	MAPK10	Cinaroside (Qinghao)	0.0569764
qinghao_041	Cinaroside	Qinghao	MAPK14	Cinaroside (Qinghao)	0.0569764
qinghao_041	Cinaroside	Qinghao	PRSS1	Cinaroside (Qinghao)	0.0569764
qinghao_041	Cinaroside	Qinghao	PTPN1	Cinaroside (Qinghao)	0.0569764
qinghao_041	Cinaroside	Qinghao	STK33	Cinaroside (Qinghao)	0.0569764
qinghao_041	Cinaroside	Qinghao	TNF	Cinaroside (Qinghao)	0.0569764
qinghao_043	Cirsilineol	Qinghao	CALM1	Cirsilineol (Qinghao)	0.15273
qinghao_043	Cirsilineol	Qinghao	KCNMA1	Cirsilineol (Qinghao)	0.15273
qinghao_043	Cirsilineol	Qinghao	NCOA1	Cirsilineol (Qinghao)	0.15273
qinghao_043	Cirsilineol	Qinghao	NCOA2	Cirsilineol (Qinghao)	0.15273
qinghao_043	Cirsilineol	Qinghao	PRSS1	Cirsilineol (Qinghao)	0.15273
qinghao_044	Cirsiliol	Qinghao	CALM1	Cirsiliol (Qinghao)	0.172877
qinghao_044	Cirsiliol	Qinghao	CYP1A1	Cirsiliol (Qinghao)	0.172877
qinghao_044	Cirsiliol	Qinghao	CYP1B1	Cirsiliol (Qinghao)	0.172877
qinghao_044	Cirsiliol	Qinghao	NCOA2	Cirsiliol (Qinghao)	0.172877
qinghao_044	Cirsiliol	Qinghao	PRSS1	Cirsiliol (Qinghao)	0.172877
qinghao_045	Cirsimaritin	Qinghao	ADORA3	Cirsimaritin (Qinghao)	0.124286
qinghao_045	Cirsimaritin	Qinghao	CALM1	Cirsimaritin (Qinghao)	0.124286
qinghao_045	Cirsimaritin	Qinghao	NCOA1	Cirsimaritin (Qinghao)	0.124286
qinghao_045	Cirsimaritin	Qinghao	NCOA2	Cirsimaritin (Qinghao)	0.124286
qinghao_045	Cirsimaritin	Qinghao	PRSS1	Cirsimaritin (Qinghao)	0.124286
qinghao_046	alpha-Copaene	Qinghao	GABRA6	alpha-Copaene (Qinghao)	0.382353
qinghao_047	Coumarin	Qinghao	AKR1B1	Coumarin (Qinghao)	0.236484
qinghao_047	Coumarin	Qinghao	AKR1C1	Coumarin (Qinghao)	0.236484
qinghao_047	Coumarin	Qinghao	BACE1	Coumarin (Qinghao)	0.236484
qinghao_047	Coumarin	Qinghao	CA1	Coumarin (Qinghao)	0.236484
qinghao_047	Coumarin	Qinghao	CA12	Coumarin (Qinghao)	0.236484
qinghao_047	Coumarin	Qinghao	CA13	Coumarin (Qinghao)	0.236484
qinghao_047	Coumarin	Qinghao	CA14	Coumarin (Qinghao)	0.236484
qinghao_047	Coumarin	Qinghao	CA2	Coumarin (Qinghao)	0.236484
qinghao_047	Coumarin	Qinghao	CA3	Coumarin (Qinghao)	0.236484
qinghao_047	Coumarin	Qinghao	CA4	Coumarin (Qinghao)	0.236484
qinghao_047	Coumarin	Qinghao	CA5A	Coumarin (Qinghao)	0.236484
qinghao_047	Coumarin	Qinghao	CA5B	Coumarin (Qinghao)	0.236484
qinghao_047	Coumarin	Qinghao	CA6	Coumarin (Qinghao)	0.236484
qinghao_047	Coumarin	Qinghao	CA7	Coumarin (Qinghao)	0.236484
qinghao_047	Coumarin	Qinghao	CA9	Coumarin (Qinghao)	0.236484
qinghao_047	Coumarin	Qinghao	CYP2A6	Coumarin (Qinghao)	0.236484
qinghao_047	Coumarin	Qinghao	CYP3A4	Coumarin (Qinghao)	0.236484
qinghao_047	Coumarin	Qinghao	GAPDH	Coumarin (Qinghao)	0.236484
qinghao_047	Coumarin	Qinghao	GCLC	Coumarin (Qinghao)	0.236484
qinghao_047	Coumarin	Qinghao	GSTA2	Coumarin (Qinghao)	0.236484
qinghao_047	Coumarin	Qinghao	GSTP1	Coumarin (Qinghao)	0.236484
qinghao_047	Coumarin	Qinghao	SORD	Coumarin (Qinghao)	0.236484
qinghao_047	Coumarin	Qinghao	UGT1A1	Coumarin (Qinghao)	0.236484
qinghao_047	Coumarin	Qinghao	UGT1A4	Coumarin (Qinghao)	0.236484
qinghao_047	Coumarin	Qinghao	UGT1A6	Coumarin (Qinghao)	0.236484
qinghao_047	Coumarin	Qinghao	UGT2B10	Coumarin (Qinghao)	0.236484
qinghao_047	Coumarin	Qinghao	XPO1	Coumarin (Qinghao)	0.236484
qinghao_048	Cumaldehyde	Qinghao	TYR	Cumaldehyde (Qinghao)	0.598183
qinghao_051	Dihydro-epi-deoxyarteannuin B	Qinghao	GABRA6	Dihydro-epi-deoxyarteannuin B (Qinghao)	0.30134
qinghao_051	Dihydro-epi-deoxyarteannuin B	Qinghao	GRIA2	Dihydro-epi-deoxyarteannuin B (Qinghao)	0.30134
qinghao_054	3, 5-Dihydroxy-6, 7, 3’, 4’-tetramethoxyflavone	Qinghao	CALM1	3, 5-Dihydroxy-6, 7, 3’, 4’-tetramethoxyflavone (Qinghao)	0.192654
qinghao_054	3, 5-Dihydroxy-6, 7, 3’, 4’-tetramethoxyflavone	Qinghao	IGHG1	3, 5-Dihydroxy-6, 7, 3’, 4’-tetramethoxyflavone (Qinghao)	0.192654
qinghao_054	3, 5-Dihydroxy-6, 7, 3’, 4’-tetramethoxyflavone	Qinghao	KCNMA1	3, 5-Dihydroxy-6, 7, 3’, 4’-tetramethoxyflavone (Qinghao)	0.192654
qinghao_054	3, 5-Dihydroxy-6, 7, 3’, 4’-tetramethoxyflavone	Qinghao	NCOA1	3, 5-Dihydroxy-6, 7, 3’, 4’-tetramethoxyflavone (Qinghao)	0.192654
qinghao_054	3, 5-Dihydroxy-6, 7, 3’, 4’-tetramethoxyflavone	Qinghao	NCOA2	3, 5-Dihydroxy-6, 7, 3’, 4’-tetramethoxyflavone (Qinghao)	0.192654
qinghao_054	3, 5-Dihydroxy-6, 7, 3’, 4’-tetramethoxyflavone	Qinghao	PIM1	3, 5-Dihydroxy-6, 7, 3’, 4’-tetramethoxyflavone (Qinghao)	0.192654
qinghao_054	3, 5-Dihydroxy-6, 7, 3’, 4’-tetramethoxyflavone	Qinghao	PRSS1	3, 5-Dihydroxy-6, 7, 3’, 4’-tetramethoxyflavone (Qinghao)	0.192654
qinghao_057	beta-Elemene	Qinghao	GABRA6	beta-Elemene (Qinghao)	0.272058
qinghao_057	beta-Elemene	Qinghao	NCOA2	beta-Elemene (Qinghao)	0.272058
qinghao_057	beta-Elemene	Qinghao	RB1	beta-Elemene (Qinghao)	0.272058
qinghao_059	Epideoxyarteannuin B	Qinghao	GABRA6	Epideoxyarteannuin B (Qinghao)	0.291052
qinghao_059	Epideoxyarteannuin B	Qinghao	GRIA2	Epideoxyarteannuin B (Qinghao)	0.291052
qinghao_065	Eupatin	Qinghao	CALM1	Eupatin (Qinghao)	0.191805
qinghao_065	Eupatin	Qinghao	NCOA2	Eupatin (Qinghao)	0.191805
qinghao_065	Eupatin	Qinghao	PPARD	Eupatin (Qinghao)	0.191805
qinghao_065	Eupatin	Qinghao	PRSS1	Eupatin (Qinghao)	0.191805
qinghao_070	Friedelan-3-one	Qinghao	GPBAR1	Friedelan-3-one (Qinghao)	0.169007
qinghao_072	7-Hydroxy-6,8-dimethoxy coumarin	Qinghao	CA4	7-Hydroxy-6,8-dimethoxy coumarin (Qinghao)	0.256979
qinghao_072	7-Hydroxy-6,8-dimethoxy coumarin	Qinghao	GRIA2	7-Hydroxy-6,8-dimethoxy coumarin (Qinghao)	0.256979
qinghao_078	5-Hydroxy-3,6,7,4'-tetramethoxytlavone	Qinghao	CALM1	5-Hydroxy-3,6,7,4'-tetramethoxytlavone (Qinghao)	0.180299
qinghao_078	5-Hydroxy-3,6,7,4'-tetramethoxytlavone	Qinghao	KCNMA1	5-Hydroxy-3,6,7,4'-tetramethoxytlavone (Qinghao)	0.180299
qinghao_078	5-Hydroxy-3,6,7,4'-tetramethoxytlavone	Qinghao	NCOA2	5-Hydroxy-3,6,7,4'-tetramethoxytlavone (Qinghao)	0.180299
qinghao_078	5-Hydroxy-3,6,7,4'-tetramethoxytlavone	Qinghao	PRSS1	5-Hydroxy-3,6,7,4'-tetramethoxytlavone (Qinghao)	0.180299
qinghao_081	L-Isoborneol	Qinghao	ADRA1A	L-Isoborneol (Qinghao)	0.399358
qinghao_081	L-Isoborneol	Qinghao	CHRM1	L-Isoborneol (Qinghao)	0.399358
qinghao_081	L-Isoborneol	Qinghao	CHRM2	L-Isoborneol (Qinghao)	0.399358
qinghao_081	L-Isoborneol	Qinghao	CHRM3	L-Isoborneol (Qinghao)	0.399358
qinghao_081	L-Isoborneol	Qinghao	GABRA1	L-Isoborneol (Qinghao)	0.399358
qinghao_081	L-Isoborneol	Qinghao	GABRA2	L-Isoborneol (Qinghao)	0.399358
qinghao_081	L-Isoborneol	Qinghao	GABRA3	L-Isoborneol (Qinghao)	0.399358
qinghao_081	L-Isoborneol	Qinghao	GABRA5	L-Isoborneol (Qinghao)	0.399358
qinghao_081	L-Isoborneol	Qinghao	GABRA6	L-Isoborneol (Qinghao)	0.399358
qinghao_081	L-Isoborneol	Qinghao	PGR	L-Isoborneol (Qinghao)	0.399358
qinghao_081	L-Isoborneol	Qinghao	PTGS2	L-Isoborneol (Qinghao)	0.399358
qinghao_081	L-Isoborneol	Qinghao	SLC6A2	L-Isoborneol (Qinghao)	0.399358
qinghao_083	Isofraxidin	Qinghao	CA4	Isofraxidin (Qinghao)	0.256979
qinghao_083	Isofraxidin	Qinghao	GRIA2	Isofraxidin (Qinghao)	0.256979
qinghao_084	Isoquercitrin	Qinghao	ACHE	Isoquercitrin (Qinghao)	0.0614682
qinghao_084	Isoquercitrin	Qinghao	AURKB	Isoquercitrin (Qinghao)	0.0614682
qinghao_084	Isoquercitrin	Qinghao	PTPN1	Isoquercitrin (Qinghao)	0.0614682
qinghao_085	Isorhamnetin	Qinghao	AMY1A	Isorhamnetin (Qinghao)	0.137778
qinghao_085	Isorhamnetin	Qinghao	AURKB	Isorhamnetin (Qinghao)	0.137778
qinghao_085	Isorhamnetin	Qinghao	CA1	Isorhamnetin (Qinghao)	0.137778
qinghao_085	Isorhamnetin	Qinghao	CA12	Isorhamnetin (Qinghao)	0.137778
qinghao_085	Isorhamnetin	Qinghao	CA2	Isorhamnetin (Qinghao)	0.137778
qinghao_085	Isorhamnetin	Qinghao	CA4	Isorhamnetin (Qinghao)	0.137778
qinghao_085	Isorhamnetin	Qinghao	CA7	Isorhamnetin (Qinghao)	0.137778
qinghao_085	Isorhamnetin	Qinghao	CALM1	Isorhamnetin (Qinghao)	0.137778
qinghao_085	Isorhamnetin	Qinghao	CCNA2	Isorhamnetin (Qinghao)	0.137778
qinghao_085	Isorhamnetin	Qinghao	CHEK1	Isorhamnetin (Qinghao)	0.137778
qinghao_085	Isorhamnetin	Qinghao	CYP1A1	Isorhamnetin (Qinghao)	0.137778
qinghao_085	Isorhamnetin	Qinghao	CYP1B1	Isorhamnetin (Qinghao)	0.137778
qinghao_085	Isorhamnetin	Qinghao	ESR2	Isorhamnetin (Qinghao)	0.137778
qinghao_085	Isorhamnetin	Qinghao	GRIA2	Isorhamnetin (Qinghao)	0.137778
qinghao_085	Isorhamnetin	Qinghao	MAPK10	Isorhamnetin (Qinghao)	0.137778
qinghao_085	Isorhamnetin	Qinghao	MAPK14	Isorhamnetin (Qinghao)	0.137778
qinghao_085	Isorhamnetin	Qinghao	NCOA1	Isorhamnetin (Qinghao)	0.137778
qinghao_085	Isorhamnetin	Qinghao	NCOA2	Isorhamnetin (Qinghao)	0.137778
qinghao_085	Isorhamnetin	Qinghao	PIM1	Isorhamnetin (Qinghao)	0.137778
qinghao_085	Isorhamnetin	Qinghao	PPARD	Isorhamnetin (Qinghao)	0.137778
qinghao_085	Isorhamnetin	Qinghao	PRSS1	Isorhamnetin (Qinghao)	0.137778
qinghao_085	Isorhamnetin	Qinghao	PTPN1	Isorhamnetin (Qinghao)	0.137778
qinghao_085	Isorhamnetin	Qinghao	PYGM	Isorhamnetin (Qinghao)	0.137778
qinghao_085	Isorhamnetin	Qinghao	XDH	Isorhamnetin (Qinghao)	0.137778
qinghao_086	3,5,7,4'-Tetrahydroxyflavone	Qinghao	ABCB1	3,5,7,4'-Tetrahydroxyflavone (Qinghao)	0.136467
qinghao_086	3,5,7,4'-Tetrahydroxyflavone	Qinghao	ABCC1	3,5,7,4'-Tetrahydroxyflavone (Qinghao)	0.136467
qinghao_086	3,5,7,4'-Tetrahydroxyflavone	Qinghao	ABCG2	3,5,7,4'-Tetrahydroxyflavone (Qinghao)	0.136467
qinghao_086	3,5,7,4'-Tetrahydroxyflavone	Qinghao	ACHE	3,5,7,4'-Tetrahydroxyflavone (Qinghao)	0.136467
qinghao_086	3,5,7,4'-Tetrahydroxyflavone	Qinghao	AHR	3,5,7,4'-Tetrahydroxyflavone (Qinghao)	0.136467
qinghao_086	3,5,7,4'-Tetrahydroxyflavone	Qinghao	AKR1B1	3,5,7,4'-Tetrahydroxyflavone (Qinghao)	0.136467
qinghao_086	3,5,7,4'-Tetrahydroxyflavone	Qinghao	AKR1C3	3,5,7,4'-Tetrahydroxyflavone (Qinghao)	0.136467
qinghao_086	3,5,7,4'-Tetrahydroxyflavone	Qinghao	ALOX5	3,5,7,4'-Tetrahydroxyflavone (Qinghao)	0.136467
qinghao_086	3,5,7,4'-Tetrahydroxyflavone	Qinghao	AMY1A	3,5,7,4'-Tetrahydroxyflavone (Qinghao)	0.136467
qinghao_086	3,5,7,4'-Tetrahydroxyflavone	Qinghao	APP	3,5,7,4'-Tetrahydroxyflavone (Qinghao)	0.136467
qinghao_086	3,5,7,4'-Tetrahydroxyflavone	Qinghao	AR	3,5,7,4'-Tetrahydroxyflavone (Qinghao)	0.136467
qinghao_086	3,5,7,4'-Tetrahydroxyflavone	Qinghao	AURKB	3,5,7,4'-Tetrahydroxyflavone (Qinghao)	0.136467
qinghao_086	3,5,7,4'-Tetrahydroxyflavone	Qinghao	BCHE	3,5,7,4'-Tetrahydroxyflavone (Qinghao)	0.136467
qinghao_086	3,5,7,4'-Tetrahydroxyflavone	Qinghao	BCL2	3,5,7,4'-Tetrahydroxyflavone (Qinghao)	0.136467
qinghao_086	3,5,7,4'-Tetrahydroxyflavone	Qinghao	CA1	3,5,7,4'-Tetrahydroxyflavone (Qinghao)	0.136467
qinghao_086	3,5,7,4'-Tetrahydroxyflavone	Qinghao	CA12	3,5,7,4'-Tetrahydroxyflavone (Qinghao)	0.136467
qinghao_086	3,5,7,4'-Tetrahydroxyflavone	Qinghao	CA2	3,5,7,4'-Tetrahydroxyflavone (Qinghao)	0.136467
qinghao_086	3,5,7,4'-Tetrahydroxyflavone	Qinghao	CA4	3,5,7,4'-Tetrahydroxyflavone (Qinghao)	0.136467
qinghao_086	3,5,7,4'-Tetrahydroxyflavone	Qinghao	CA7	3,5,7,4'-Tetrahydroxyflavone (Qinghao)	0.136467
qinghao_086	3,5,7,4'-Tetrahydroxyflavone	Qinghao	CALM1	3,5,7,4'-Tetrahydroxyflavone (Qinghao)	0.136467
qinghao_086	3,5,7,4'-Tetrahydroxyflavone	Qinghao	CISD1	3,5,7,4'-Tetrahydroxyflavone (Qinghao)	0.136467
qinghao_086	3,5,7,4'-Tetrahydroxyflavone	Qinghao	CTDSP1	3,5,7,4'-Tetrahydroxyflavone (Qinghao)	0.136467
qinghao_086	3,5,7,4'-Tetrahydroxyflavone	Qinghao	CYP1A1	3,5,7,4'-Tetrahydroxyflavone (Qinghao)	0.136467
qinghao_086	3,5,7,4'-Tetrahydroxyflavone	Qinghao	CYP1A2	3,5,7,4'-Tetrahydroxyflavone (Qinghao)	0.136467
qinghao_086	3,5,7,4'-Tetrahydroxyflavone	Qinghao	CYP1B1	3,5,7,4'-Tetrahydroxyflavone (Qinghao)	0.136467
qinghao_086	3,5,7,4'-Tetrahydroxyflavone	Qinghao	CYP2C9	3,5,7,4'-Tetrahydroxyflavone (Qinghao)	0.136467
qinghao_086	3,5,7,4'-Tetrahydroxyflavone	Qinghao	CYP3A4	3,5,7,4'-Tetrahydroxyflavone (Qinghao)	0.136467
qinghao_086	3,5,7,4'-Tetrahydroxyflavone	Qinghao	DAPK1	3,5,7,4'-Tetrahydroxyflavone (Qinghao)	0.136467
qinghao_086	3,5,7,4'-Tetrahydroxyflavone	Qinghao	DPP3	3,5,7,4'-Tetrahydroxyflavone (Qinghao)	0.136467
qinghao_086	3,5,7,4'-Tetrahydroxyflavone	Qinghao	DPP4	3,5,7,4'-Tetrahydroxyflavone (Qinghao)	0.136467
qinghao_086	3,5,7,4'-Tetrahydroxyflavone	Qinghao	EGFR	3,5,7,4'-Tetrahydroxyflavone (Qinghao)	0.136467
qinghao_086	3,5,7,4'-Tetrahydroxyflavone	Qinghao	ESRRA	3,5,7,4'-Tetrahydroxyflavone (Qinghao)	0.136467
qinghao_086	3,5,7,4'-Tetrahydroxyflavone	Qinghao	FLT3	3,5,7,4'-Tetrahydroxyflavone (Qinghao)	0.136467
qinghao_086	3,5,7,4'-Tetrahydroxyflavone	Qinghao	GLO1	3,5,7,4'-Tetrahydroxyflavone (Qinghao)	0.136467
qinghao_086	3,5,7,4'-Tetrahydroxyflavone	Qinghao	GSK3B	3,5,7,4'-Tetrahydroxyflavone (Qinghao)	0.136467
qinghao_086	3,5,7,4'-Tetrahydroxyflavone	Qinghao	GSTM1	3,5,7,4'-Tetrahydroxyflavone (Qinghao)	0.136467
qinghao_086	3,5,7,4'-Tetrahydroxyflavone	Qinghao	GSTM2	3,5,7,4'-Tetrahydroxyflavone (Qinghao)	0.136467
qinghao_086	3,5,7,4'-Tetrahydroxyflavone	Qinghao	GSTP1	3,5,7,4'-Tetrahydroxyflavone (Qinghao)	0.136467
qinghao_086	3,5,7,4'-Tetrahydroxyflavone	Qinghao	HMOX1	3,5,7,4'-Tetrahydroxyflavone (Qinghao)	0.136467
qinghao_086	3,5,7,4'-Tetrahydroxyflavone	Qinghao	HSD17B1	3,5,7,4'-Tetrahydroxyflavone (Qinghao)	0.136467
qinghao_086	3,5,7,4'-Tetrahydroxyflavone	Qinghao	HSD17B2	3,5,7,4'-Tetrahydroxyflavone (Qinghao)	0.136467
qinghao_086	3,5,7,4'-Tetrahydroxyflavone	Qinghao	INSR	3,5,7,4'-Tetrahydroxyflavone (Qinghao)	0.136467
qinghao_086	3,5,7,4'-Tetrahydroxyflavone	Qinghao	JUN	3,5,7,4'-Tetrahydroxyflavone (Qinghao)	0.136467
qinghao_086	3,5,7,4'-Tetrahydroxyflavone	Qinghao	MAPK10	3,5,7,4'-Tetrahydroxyflavone (Qinghao)	0.136467
qinghao_086	3,5,7,4'-Tetrahydroxyflavone	Qinghao	MAPK14	3,5,7,4'-Tetrahydroxyflavone (Qinghao)	0.136467
qinghao_086	3,5,7,4'-Tetrahydroxyflavone	Qinghao	MAPK8	3,5,7,4'-Tetrahydroxyflavone (Qinghao)	0.136467
qinghao_086	3,5,7,4'-Tetrahydroxyflavone	Qinghao	MMP1	3,5,7,4'-Tetrahydroxyflavone (Qinghao)	0.136467
qinghao_086	3,5,7,4'-Tetrahydroxyflavone	Qinghao	NCOA2	3,5,7,4'-Tetrahydroxyflavone (Qinghao)	0.136467
qinghao_086	3,5,7,4'-Tetrahydroxyflavone	Qinghao	NEU2	3,5,7,4'-Tetrahydroxyflavone (Qinghao)	0.136467
qinghao_086	3,5,7,4'-Tetrahydroxyflavone	Qinghao	NOX4	3,5,7,4'-Tetrahydroxyflavone (Qinghao)	0.136467
qinghao_086	3,5,7,4'-Tetrahydroxyflavone	Qinghao	PPP3CA	3,5,7,4'-Tetrahydroxyflavone (Qinghao)	0.136467
qinghao_086	3,5,7,4'-Tetrahydroxyflavone	Qinghao	PREP	3,5,7,4'-Tetrahydroxyflavone (Qinghao)	0.136467
qinghao_086	3,5,7,4'-Tetrahydroxyflavone	Qinghao	PRSS1	3,5,7,4'-Tetrahydroxyflavone (Qinghao)	0.136467
qinghao_086	3,5,7,4'-Tetrahydroxyflavone	Qinghao	PTGS1	3,5,7,4'-Tetrahydroxyflavone (Qinghao)	0.136467
qinghao_086	3,5,7,4'-Tetrahydroxyflavone	Qinghao	PTGS2	3,5,7,4'-Tetrahydroxyflavone (Qinghao)	0.136467
qinghao_086	3,5,7,4'-Tetrahydroxyflavone	Qinghao	SELE	3,5,7,4'-Tetrahydroxyflavone (Qinghao)	0.136467
qinghao_086	3,5,7,4'-Tetrahydroxyflavone	Qinghao	TYR	3,5,7,4'-Tetrahydroxyflavone (Qinghao)	0.136467
qinghao_086	3,5,7,4'-Tetrahydroxyflavone	Qinghao	VCAM1	3,5,7,4'-Tetrahydroxyflavone (Qinghao)	0.136467
qinghao_086	3,5,7,4'-Tetrahydroxyflavone	Qinghao	XDH	3,5,7,4'-Tetrahydroxyflavone (Qinghao)	0.136467
qinghao_086	3,5,7,4'-Tetrahydroxyflavone	Qinghao	XIAP	3,5,7,4'-Tetrahydroxyflavone (Qinghao)	0.136467
qinghao_090	Luteolin	Qinghao	ABCB1	Luteolin (Qinghao)	0.157485
qinghao_090	Luteolin	Qinghao	ABCG2	Luteolin (Qinghao)	0.157485
qinghao_090	Luteolin	Qinghao	ACHE	Luteolin (Qinghao)	0.157485
qinghao_090	Luteolin	Qinghao	AKR1B1	Luteolin (Qinghao)	0.157485
qinghao_090	Luteolin	Qinghao	ALOX5	Luteolin (Qinghao)	0.157485
qinghao_090	Luteolin	Qinghao	AMY1A	Luteolin (Qinghao)	0.157485
qinghao_090	Luteolin	Qinghao	APP	Luteolin (Qinghao)	0.157485
qinghao_090	Luteolin	Qinghao	AR	Luteolin (Qinghao)	0.157485
qinghao_090	Luteolin	Qinghao	AURKB	Luteolin (Qinghao)	0.157485
qinghao_090	Luteolin	Qinghao	BCHE	Luteolin (Qinghao)	0.157485
qinghao_090	Luteolin	Qinghao	CA1	Luteolin (Qinghao)	0.157485
qinghao_090	Luteolin	Qinghao	CA12	Luteolin (Qinghao)	0.157485
qinghao_090	Luteolin	Qinghao	CA2	Luteolin (Qinghao)	0.157485
qinghao_090	Luteolin	Qinghao	CA4	Luteolin (Qinghao)	0.157485
qinghao_090	Luteolin	Qinghao	CA7	Luteolin (Qinghao)	0.157485
qinghao_090	Luteolin	Qinghao	CASP7	Luteolin (Qinghao)	0.157485
qinghao_090	Luteolin	Qinghao	CD38	Luteolin (Qinghao)	0.157485
qinghao_090	Luteolin	Qinghao	CDK2	Luteolin (Qinghao)	0.157485
qinghao_090	Luteolin	Qinghao	CDK4	Luteolin (Qinghao)	0.157485
qinghao_090	Luteolin	Qinghao	CYP1A1	Luteolin (Qinghao)	0.157485
qinghao_090	Luteolin	Qinghao	CYP1B1	Luteolin (Qinghao)	0.157485
qinghao_090	Luteolin	Qinghao	DAPK1	Luteolin (Qinghao)	0.157485
qinghao_090	Luteolin	Qinghao	DPP3	Luteolin (Qinghao)	0.157485
qinghao_090	Luteolin	Qinghao	DPP4	Luteolin (Qinghao)	0.157485
qinghao_090	Luteolin	Qinghao	FASN	Luteolin (Qinghao)	0.157485
qinghao_090	Luteolin	Qinghao	FLT3	Luteolin (Qinghao)	0.157485
qinghao_090	Luteolin	Qinghao	GLO1	Luteolin (Qinghao)	0.157485
qinghao_090	Luteolin	Qinghao	GPR35	Luteolin (Qinghao)	0.157485
qinghao_090	Luteolin	Qinghao	GSK3B	Luteolin (Qinghao)	0.157485
qinghao_090	Luteolin	Qinghao	GSTP1	Luteolin (Qinghao)	0.157485
qinghao_090	Luteolin	Qinghao	HMOX1	Luteolin (Qinghao)	0.157485
qinghao_090	Luteolin	Qinghao	HSP90AA1	Luteolin (Qinghao)	0.157485
qinghao_090	Luteolin	Qinghao	IFNG	Luteolin (Qinghao)	0.157485
qinghao_090	Luteolin	Qinghao	IL2	Luteolin (Qinghao)	0.157485
qinghao_090	Luteolin	Qinghao	IL6	Luteolin (Qinghao)	0.157485
qinghao_090	Luteolin	Qinghao	INSR	Luteolin (Qinghao)	0.157485
qinghao_090	Luteolin	Qinghao	JUN	Luteolin (Qinghao)	0.157485
qinghao_090	Luteolin	Qinghao	LCK	Luteolin (Qinghao)	0.157485
qinghao_090	Luteolin	Qinghao	MAOA	Luteolin (Qinghao)	0.157485
qinghao_090	Luteolin	Qinghao	MAOB	Luteolin (Qinghao)	0.157485
qinghao_090	Luteolin	Qinghao	MAPK1	Luteolin (Qinghao)	0.157485
qinghao_090	Luteolin	Qinghao	MAPK10	Luteolin (Qinghao)	0.157485
qinghao_090	Luteolin	Qinghao	MAPK14	Luteolin (Qinghao)	0.157485
qinghao_090	Luteolin	Qinghao	MET	Luteolin (Qinghao)	0.157485
qinghao_090	Luteolin	Qinghao	MMP1	Luteolin (Qinghao)	0.157485
qinghao_090	Luteolin	Qinghao	MMP12	Luteolin (Qinghao)	0.157485
qinghao_090	Luteolin	Qinghao	MMP13	Luteolin (Qinghao)	0.157485
qinghao_090	Luteolin	Qinghao	MMP2	Luteolin (Qinghao)	0.157485
qinghao_090	Luteolin	Qinghao	MMP3	Luteolin (Qinghao)	0.157485
qinghao_090	Luteolin	Qinghao	MMP9	Luteolin (Qinghao)	0.157485
qinghao_090	Luteolin	Qinghao	NCOA2	Luteolin (Qinghao)	0.157485
qinghao_090	Luteolin	Qinghao	NEU2	Luteolin (Qinghao)	0.157485
qinghao_090	Luteolin	Qinghao	NOX4	Luteolin (Qinghao)	0.157485
qinghao_090	Luteolin	Qinghao	PARP1	Luteolin (Qinghao)	0.157485
qinghao_090	Luteolin	Qinghao	PBRM1	Luteolin (Qinghao)	0.157485
qinghao_090	Luteolin	Qinghao	PIK3CG	Luteolin (Qinghao)	0.157485
qinghao_090	Luteolin	Qinghao	PRKCA	Luteolin (Qinghao)	0.157485
qinghao_090	Luteolin	Qinghao	PRSS1	Luteolin (Qinghao)	0.157485
qinghao_090	Luteolin	Qinghao	PSIP1	Luteolin (Qinghao)	0.157485
qinghao_090	Luteolin	Qinghao	PTGS1	Luteolin (Qinghao)	0.157485
qinghao_090	Luteolin	Qinghao	PTGS2	Luteolin (Qinghao)	0.157485
qinghao_090	Luteolin	Qinghao	RB1	Luteolin (Qinghao)	0.157485
qinghao_090	Luteolin	Qinghao	SYK	Luteolin (Qinghao)	0.157485
qinghao_090	Luteolin	Qinghao	TNF	Luteolin (Qinghao)	0.157485
qinghao_090	Luteolin	Qinghao	TNKS	Luteolin (Qinghao)	0.157485
qinghao_090	Luteolin	Qinghao	TNKS2	Luteolin (Qinghao)	0.157485
qinghao_090	Luteolin	Qinghao	TOP1	Luteolin (Qinghao)	0.157485
qinghao_090	Luteolin	Qinghao	TP53	Luteolin (Qinghao)	0.157485
qinghao_090	Luteolin	Qinghao	TTR	Luteolin (Qinghao)	0.157485
qinghao_090	Luteolin	Qinghao	VEGFA	Luteolin (Qinghao)	0.157485
qinghao_090	Luteolin	Qinghao	XDH	Luteolin (Qinghao)	0.157485
qinghao_104	Patuletin	Qinghao	MAPK10	Patuletin (Qinghao)	0.180872
qinghao_104	Patuletin	Qinghao	MAPK14	Patuletin (Qinghao)	0.180872
qinghao_104	Patuletin	Qinghao	NCOA2	Patuletin (Qinghao)	0.180872
qinghao_104	Patuletin	Qinghao	PRSS1	Patuletin (Qinghao)	0.180872
qinghao_106	Penduletin	Qinghao	ABCB1	Penduletin (Qinghao)	0.139626
qinghao_106	Penduletin	Qinghao	ABCG2	Penduletin (Qinghao)	0.139626
qinghao_106	Penduletin	Qinghao	CALM1	Penduletin (Qinghao)	0.139626
qinghao_106	Penduletin	Qinghao	NCOA2	Penduletin (Qinghao)	0.139626
qinghao_106	Penduletin	Qinghao	PRSS1	Penduletin (Qinghao)	0.139626
qinghao_110	beta--Pinene	Qinghao	ADRA1B	beta--Pinene (Qinghao)	0.606571
qinghao_110	beta--Pinene	Qinghao	ADRA2C	beta--Pinene (Qinghao)	0.606571
qinghao_110	beta--Pinene	Qinghao	CHRNA2	beta--Pinene (Qinghao)	0.606571
qinghao_110	beta--Pinene	Qinghao	GABRA5	beta--Pinene (Qinghao)	0.606571
qinghao_110	beta--Pinene	Qinghao	GABRA6	beta--Pinene (Qinghao)	0.606571
qinghao_110	beta--Pinene	Qinghao	MAOA	beta--Pinene (Qinghao)	0.606571
qinghao_110	beta--Pinene	Qinghao	NCOA2	beta--Pinene (Qinghao)	0.606571
qinghao_110	beta--Pinene	Qinghao	RXRA	beta--Pinene (Qinghao)	0.606571
qinghao_110	beta--Pinene	Qinghao	SLC6A3	beta--Pinene (Qinghao)	0.606571
qinghao_115	Quercetin	Qinghao	ABCB1	Quercetin (Qinghao)	0.159066
qinghao_115	Quercetin	Qinghao	ABCC1	Quercetin (Qinghao)	0.159066
qinghao_115	Quercetin	Qinghao	ABCG2	Quercetin (Qinghao)	0.159066
qinghao_115	Quercetin	Qinghao	ACACA	Quercetin (Qinghao)	0.159066
qinghao_115	Quercetin	Qinghao	ACHE	Quercetin (Qinghao)	0.159066
qinghao_115	Quercetin	Qinghao	ACPP	Quercetin (Qinghao)	0.159066
qinghao_115	Quercetin	Qinghao	ADORA3	Quercetin (Qinghao)	0.159066
qinghao_115	Quercetin	Qinghao	ADRA1A	Quercetin (Qinghao)	0.159066
qinghao_115	Quercetin	Qinghao	ADRA1B	Quercetin (Qinghao)	0.159066
qinghao_115	Quercetin	Qinghao	ADRA2A	Quercetin (Qinghao)	0.159066
qinghao_115	Quercetin	Qinghao	ADRA2B	Quercetin (Qinghao)	0.159066
qinghao_115	Quercetin	Qinghao	ADRA2C	Quercetin (Qinghao)	0.159066
qinghao_115	Quercetin	Qinghao	AHR	Quercetin (Qinghao)	0.159066
qinghao_115	Quercetin	Qinghao	AKR1B1	Quercetin (Qinghao)	0.159066
qinghao_115	Quercetin	Qinghao	AKT1	Quercetin (Qinghao)	0.159066
qinghao_115	Quercetin	Qinghao	ALK	Quercetin (Qinghao)	0.159066
[truncated: 1,079 more rows]
