# Supplementary material for: A Network Pharmacology Study of the Multi-Targeting Profile of an Antiarrhythmic Chinese Medicine Xin Su Ning
Source: Front Pharmacol. 2019 Sep 25;10:1138. doi: 10.3389/fphar.2019.01138 (PMC6774044; doi:10.3389/fphar.2019.01138)
Supplement: Table S3 — XSN Target Weight Coefficient type. [file Table_3.xlsx]

## Sheet: default
Gene_Symbol	Target_Weight_Coefficient	UniProt_ID	ChEMBL_ID	Target_Name	Classification_1	Classification_2	Classification_3	Classification_4	Classification_5	Classification_6	Classification_7	Classification_8
AARS	1.81342	P49588	CHEMBL3574	Alanyl-tRNA synthetase	Enzyme	Ligase
AARS2	1.02083	Q5JTZ9		Alanine--tRNA ligase, mitochondrial	Enzyme	Ligase
ABAT	4.5766	P80404	CHEMBL2044	Gamma-amino-N-butyrate transaminase	Enzyme	Transferase
ABCB1	2586.08	P08183	CHEMBL4302	P-glycoprotein 1	Transporter	Other	ATP-binding cassette
ABCB11	1.16128	O95342	CHEMBL6020	Bile salt export pump	Transporter	Other	ATP-binding cassette
ABCC1	1.13861	P33527	CHEMBL3004	Multidrug resistance-associated protein 1	Transporter	Other	ATP-binding cassette
ABCC2	0.150128	Q92887	CHEMBL5748	Canalicular multispecific organic anion transporter 1	Transporter	Other	ATP-binding cassette
ABCC8	13817.5	Q09428	CHEMBL2071	Sulfonylurea receptor 1	Transporter	Other	ATP-binding cassette
ABCG2	1.48389	Q9UNQ0	CHEMBL5393	ATP-binding cassette sub-family G member 2	Transporter	Other	ATP-binding cassette
ABL1	0.258814	P00519	CHEMBL1862	Tyrosine-protein kinase ABL	Kinase	Protein Kinase	TK protein kinase group
ACACA	0.628163	Q13085	CHEMBL3351	Acetyl-CoA carboxylase 1	Enzyme	Ligase
ACE	0.441608	P12821	CHEMBL1808	Angiotensin-converting enzyme	Enzyme	Protease	Metallo protease	Metallo protease M2 family
ACHE	17809.8	P22303	CHEMBL220	Acetylcholinesterase	Enzyme	Hydrolase
ACOT1	0.239651	Q86TX2	CHEMBL2189136	Acyl-coenzyme A thioesterase 1	Enzyme	Hydrolase
ACP1	0.204143	P24666	CHEMBL4903	Low molecular weight phosphotyrosine protein phosphatase	Enzyme	Phosphatase	Protein Phosphatase
ACPP	0.420896	P15309	CHEMBL2633	Prostatic acid phosphatase	Enzyme	Phosphatase
ADA	0.0150114	P00813	CHEMBL1910	Adenosine deaminase	Enzyme	Hydrolase
ADAM17	0.441608	P78536	CHEMBL3706	ADAM17	Enzyme	Protease	Metallo protease	Metallo protease M12B subfamily
ADCYAP1	0.0306124	P18509	CHEMBL5692	Pituitary adenylate cyclase-activating polypeptide	Other	Unclassified protein
ADH1A	3.55202	P07327	CHEMBL1970	Alcohol dehydrogenase alpha chain	Enzyme	Oxidoreductase
ADH1B	2.3196	P00325	CHEMBL3284	Alcohol dehydrogenase beta chain	Enzyme	Oxidoreductase
ADH1C	2.7078	P00326	CHEMBL3285	Alcohol dehydrogenase gamma chain	Enzyme	Oxidoreductase
ADORA1	0.0150114	P30542	CHEMBL226	Adenosine A1 receptor	GPCR	Family A GPCR	Small molecule receptor (family A GPCR)	Adenosine receptor
ADORA2A	0.0150114	P29274	CHEMBL251	Adenosine A2a receptor	GPCR	Family A GPCR	Small molecule receptor (family A GPCR)	Adenosine receptor
ADORA2B	0.0150114	P29275	CHEMBL255	Adenosine A2b receptor	GPCR	Family A GPCR	Small molecule receptor (family A GPCR)	Adenosine receptor
ADORA3	0.819199	P0DMS8	CHEMBL256	Adenosine A3 receptor	GPCR	Family A GPCR	Small molecule receptor (family A GPCR)	Adenosine receptor
ADRA1A	1.27476	P35348	CHEMBL229	Alpha-1a adrenergic receptor	GPCR	Family A GPCR	Small molecule receptor (family A GPCR)	Adrenergic receptor
ADRA1B	2.01865	P35368	CHEMBL232	Alpha-1b adrenergic receptor	GPCR	Family A GPCR	Small molecule receptor (family A GPCR)	Adrenergic receptor
ADRA1D	0.890305	P25100	CHEMBL223	Alpha-1d adrenergic receptor	GPCR	Family A GPCR	Small molecule receptor (family A GPCR)	Adrenergic receptor
ADRA2A	2.07908	P08913	CHEMBL1867	Alpha-2a adrenergic receptor	GPCR	Family A GPCR	Small molecule receptor (family A GPCR)	Adrenergic receptor
ADRA2B	13818.7	P18089	CHEMBL1942	Alpha-2b adrenergic receptor	GPCR	Family A GPCR	Small molecule receptor (family A GPCR)	Adrenergic receptor
ADRA2C	13818.7	P18825	CHEMBL1916	Alpha-2c adrenergic receptor	GPCR	Family A GPCR	Small molecule receptor (family A GPCR)	Adrenergic receptor
ADRB1	0.574271	P08588	CHEMBL213	Beta-1 adrenergic receptor	GPCR	Family A GPCR	Small molecule receptor (family A GPCR)	Adrenergic receptor
ADRB2	706.519	P07550	CHEMBL210	Beta-2 adrenergic receptor	GPCR	Family A GPCR	Small molecule receptor (family A GPCR)	Adrenergic receptor
ADSSL1	1.57395	Q8N142		Adenylosuccinate synthetase isozyme 1	Enzyme	Ligase
AGXT	5.37436	P21549		Serine--pyruvate aminotransferase	Enzyme	Transferase
AGXT2	2.44251	Q9BYV1		Alanine--glyoxylate aminotransferase 2, mitochondrial	Enzyme	Transferase
AHR	13818.2	P35869	CHEMBL3201	Aryl hydrocarbon receptor	Transcription factor	Other
AKR1B1	255.748	P15121	CHEMBL1900	Aldose reductase	Enzyme	Oxidoreductase
AKR1B10	84.0626	O60218	CHEMBL5983	Aldo-keto reductase family 1 member B10	Enzyme	Oxidoreductase
AKR1C1	1.53046	Q04828	CHEMBL5905	Aldo-keto reductase family 1 member C1	Enzyme	Oxidoreductase
AKR1C3	0.696725	P42330	CHEMBL4681	Aldo-keto-reductase family 1 member C3	Enzyme	Oxidoreductase
AKR1C4	83.1407	P17516	CHEMBL4999	Aldo-keto reductase family 1 member C4	Enzyme	Oxidoreductase
AKT1	0.26387	P31749	CHEMBL4282	Serine/threonine-protein kinase AKT	Kinase	Protein Kinase	AGC protein kinase group
ALAS1	1.02083	P13196		5-aminolevulinate synthase, nonspecific, mitochondrial	Enzyme	Transferase
ALAS2	1.02083	P22557		5-aminolevulinate synthase, erythroid-specific, mitochondrial	Enzyme	Transferase
ALDH1A1	1.02083	P00352	CHEMBL3577	Aldehyde dehydrogenase 1A1	Enzyme	Oxidoreductase
ALDH2	1.09079	P05091	CHEMBL1935	Aldehyde dehydrogenase	Enzyme	Oxidoreductase
ALDH5A1	2.22988	P51649	CHEMBL1911	Succinate semialdehyde dehydrogenase	Enzyme	Oxidoreductase
ALK	0.159066	Q9UM73	CHEMBL4247	ALK tyrosine kinase receptor	Kinase	Protein Kinase	TKL protein kinase group	TKL protein kinase STKR Type 1 subfamily
ALOX12	0.489599	P18054	CHEMBL3687	Arachidonate 12-lipoxygenase	Enzyme	Oxidoreductase
ALOX15	0.42037	P16050	CHEMBL2903	Arachidonate 15-lipoxygenase	Enzyme	Oxidoreductase
ALOX15B	0.42037	O15296	CHEMBL2457	Arachidonate 15-lipoxygenase, type II	Enzyme	Oxidoreductase
ALOX5	4.3363	P09917	CHEMBL215	Arachidonate 5-lipoxygenase	Enzyme	Oxidoreductase
ALPI	0.584192	P09923	CHEMBL5573	Intestinal alkaline phosphatase	Enzyme	Phosphatase
ALPL	0.584192	P05186	CHEMBL5979	Alkaline phosphatase, tissue-nonspecific isozyme	Enzyme	Phosphatase
AMD1	1.42168	P17707	CHEMBL4181	S-adenosylmethionine decarboxylase 1	Enzyme	Lyase
AMY1A	1.13769	P04745	CHEMBL2478	Salivary alpha-amylase	Enzyme	Hydrolase
AMY2A	1.11822	P04746	CHEMBL2045	Pancreatic alpha-amylase	Enzyme	Hydrolase
AOX1	1.03816	Q06278	CHEMBL3257	Aldehyde oxidase	Enzyme	Oxidoreductase
APAF1	2005.18	O14727	CHEMBL1795093	Apoptotic protease-activating factor 1	Other	Unclassified protein
APP	1.70546	P05067	CHEMBL2487	Beta amyloid A4 protein	Other	Membrane receptor	Other membrane receptor
AR	16076.1	P10275	CHEMBL1871	Androgen Receptor	Transcription factor	Nuclear receptor	Nuclear hormone receptor subfamily 3	Nuclear hormone receptor subfamily 3 group C member 4
ARG1	1.57395	P05089	CHEMBL1075097	Arginase-1	Enzyme	Hydrolase
ARG2	0.520836	P78540	CHEMBL1795148	Arginase-2, mitochondrial	Enzyme	Hydrolase
ASNS	1.02083	P08243	CHEMBL3120	Asparagine synthetase	Enzyme	Ligase
ATAD5	12.7491	Q96QE3	CHEMBL1741209	ATPase family AAA domain-containing protein 5	Other	Unclassified protein
ATG4B	0.1619	Q9Y4P1	CHEMBL1741221	Cysteine protease ATG4B	Enzyme	Other Enzyme
ATP2C1	1.73117	P98194		Calcium-transporting ATPase type 2C member 1	Enzyme	Translocase
ATP6V0A4	1.02083	Q9HBG4		V-type proton ATPase 116 kDa subunit a isoform 4	Enzyme	Other Enzyme
ATXN2	12.7491	Q99700	CHEMBL1795085	Ataxin-2	Other	Unclassified protein
AURKB	1.95259	Q96GD4	CHEMBL2185	Serine/threonine-protein kinase Aurora-B	Kinase	Protein Kinase	Other protein kinase group
AVPR1B	0.159066	P47901	CHEMBL1921	Vasopressin V1b receptor	GPCR	Family A GPCR	Peptide receptor (family A GPCR)	Vasopressin and oxytocin receptor
AVPR2	0.159066	P30518	CHEMBL1790	Vasopressin V2 receptor	GPCR	Family A GPCR	Peptide receptor (family A GPCR)	Vasopressin and oxytocin receptor
BACE1	623.862	P56817	CHEMBL4822	Beta-secretase 1	Enzyme	Protease	Aspartic protease	Aspartic protease A1A subfamily
BAZ2B	593.657	Q9UIF8	CHEMBL1741220	Bromodomain adjacent to zinc finger domain protein 2B	Other	Epigenetic regulator	Epigenetic Reader	Reader	Plant homeodomain
BCAT1	0.492546	P54687	CHEMBL4679	Branched-chain-amino-acid transferase	Enzyme	Transferase
BCHE	13823	P06276	CHEMBL1914	Butyrylcholinesterase	Enzyme	Hydrolase
BCL2	0.58513	P10415	CHEMBL4860	Apoptosis regulator Bcl-2	Ion channel	Other ion channel	Miscellaneous ion channel
BCL2L1	2005.18	Q07817	CHEMBL4625	Apoptosis regulator Bcl-X	Ion channel	Other ion channel	Miscellaneous ion channel
BCL2L11	27.6724	O43521	CHEMBL5777	Bcl-2-like protein 11	Other	Unclassified protein
BTK	0.37532	Q06187	CHEMBL5251	Tyrosine-protein kinase BTK	Kinase	Protein Kinase	TK protein kinase group
CA1	6.32218	P00915	CHEMBL261	Carbonic anhydrase I	Enzyme	Lyase
CA12	5.65817	O43570	CHEMBL3242	Carbonic anhydrase XII	Enzyme	Lyase
CA13	0.746825	Q8N1Q1	CHEMBL3912	Carbonic anhydrase XIII	Enzyme	Lyase
CA14	4.49225	Q9ULX7	CHEMBL3510	Carbonic anhydrase XIV	Enzyme	Lyase
CA2	6.32218	P00918	CHEMBL205	Carbonic anhydrase II	Enzyme	Lyase
CA3	3.60101	P07451	CHEMBL2885	Carbonic anhydrase III	Enzyme	Lyase
CA4	5.68807	P22748	CHEMBL3729	Carbonic anhydrase IV	Enzyme	Lyase
CA5A	3.60101	P35218	CHEMBL4789	Carbonic anhydrase VA	Enzyme	Lyase
CA5B	3.60101	Q9Y2D0	CHEMBL3969	Carbonic anhydrase VB	Enzyme	Lyase
CA6	4.0986	P23280	CHEMBL3025	Carbonic anhydrase VI	Enzyme	Lyase
CA7	5.65817	P43166	CHEMBL2326	Carbonic anhydrase VII	Enzyme	Lyase
CA9	5.00259	Q16790	CHEMBL3594	Carbonic anhydrase IX	Enzyme	Lyase
CACNA1B	593.657	Q00975	CHEMBL4478	Voltage-gated N-type calcium channel alpha-1B subunit	Ion channel	VGIC	Voltage-gated calcium channel
CACNA1S	0.140305	Q13698	CHEMBL3805	Voltage-gated L-type calcium channel alpha-1S subunit	Ion channel	VGIC	Voltage-gated calcium channel
CALM1	790.298	P0DP23	CHEMBL6093	Calmodulin	Other	Unclassified protein
CALM3	593.949	P0DP25		Calmodulin-3	Other	Unclassified protein
CAMK2B	0.159066	Q13554	CHEMBL4121	CaM kinase II beta	Kinase	Protein Kinase	CAMK protein kinase group
CASP3	83.1407	P42574	CHEMBL2334	Caspase-3	Enzyme	Protease	Cysteine protease	Cysteine protease C14 family
CASP7	83.2982	P55210	CHEMBL3468	Caspase-7	Enzyme	Protease	Cysteine protease	Cysteine protease C14 family
CAT	1.02083	P04040	CHEMBL3627594	Catalase	Enzyme	Oxidoreductase
CBR1	0.132693	P16152	CHEMBL5586	Carbonyl reductase [NADPH] 1	Enzyme	Oxidoreductase
CCL2	0.364346	P13500	CHEMBL1649052	C-C motif chemokine 2	GPCR	Family A GPCR	Peptide receptor (family A GPCR)	CC chemokine receptor
CCNA2	36.3457	P20248	CHEMBL2582	Cyclin A2	Other	Other
CCR4	0.159066	P51679	CHEMBL2414	C-C chemokine receptor type 4	GPCR	Family A GPCR	Peptide receptor (family A GPCR)	CC chemokine receptor
CD38	0.31655	P28907	CHEMBL4660	Lymphocyte differentiation antigen CD38	Enzyme	Hydrolase
CD80	0.172528	P33681	CHEMBL2364157	T-lymphocyte activation antigen CD80	Other	Other
CD86	0.362031	P42081	CHEMBL2364156	T-lymphocyte activation antigen CD86	Other	Other
CDC25B	1.99042	P30305	CHEMBL4804	Dual specificity phosphatase Cdc25B	Enzyme	Phosphatase	Protein Phosphatase
CDK1	0.920766	P06493	CHEMBL308	Cyclin-dependent kinase 1	Kinase	Protein Kinase	CMGC protein kinase group	CMGC protein kinase CDC2 subfamily
CDK2	0.529666	P24941	CHEMBL301	Cyclin-dependent kinase 2	Kinase	Protein Kinase	CMGC protein kinase group	CMGC protein kinase CDC2 subfamily
CDK4	0.700721	P11802	CHEMBL331	Cyclin-dependent kinase 4	Kinase	Protein Kinase	CMGC protein kinase group
CDK6	0.548215	Q00534	CHEMBL2508	Cyclin-dependent kinase 6	Kinase	Protein Kinase	CMGC protein kinase group
CES1	83.5759	P23141	CHEMBL2265	Acyl coenzyme A:cholesterol acyltransferase	Enzyme	Hydrolase
CES2	83.2939	O00748	CHEMBL3180	Carboxylesterase 2	Enzyme	Hydrolase
CFTR	13.2182	P13569	CHEMBL4051	Cystic fibrosis transmembrane conductance regulator	Ion channel	Other ion channel	Chloride channel
CHEK1	0.350893	O14757	CHEMBL4630	Serine/threonine-protein kinase Chk1	Kinase	Protein Kinase	CAMK protein kinase group	CAMK protein kinase CHK1 subfamily
CHKB	1.02083	Q9Y259	CHEMBL3112385	Choline/ethanolamine kinase	Enzyme	Transferase
CHRM1	13818.2	P11229	CHEMBL216	Muscarinic acetylcholine receptor M1	GPCR	Family A GPCR	Small molecule receptor (family A GPCR)	Acetylcholine receptor
CHRM2	0.769623	P08172	CHEMBL211	Muscarinic acetylcholine receptor M2	GPCR	Family A GPCR	Small molecule receptor (family A GPCR)	Acetylcholine receptor
CHRM3	0.769623	P20309	CHEMBL245	Muscarinic acetylcholine receptor M3	GPCR	Family A GPCR	Small molecule receptor (family A GPCR)	Acetylcholine receptor
CHRM4	13818.8	P08173	CHEMBL1821	Muscarinic acetylcholine receptor M4	GPCR	Family A GPCR	Small molecule receptor (family A GPCR)	Acetylcholine receptor
CHRM5	0.159066	P08912	CHEMBL2035	Muscarinic acetylcholine receptor M5	GPCR	Family A GPCR	Small molecule receptor (family A GPCR)	Acetylcholine receptor
CHRNA2	1.75533	Q15822	CHEMBL2109236	Neuronal acetylcholine receptor; alpha2/beta2	Ion channel	LGIC	Nicotinic acetylcholine receptor	Ligand-gated ion channel	Nicotinic acetylcholine receptor	Nicotinic acetylcholine receptor alpha subunit
CHRNA4	0.808113	P43681	CHEMBL1882	Neuronal acetylcholine receptor protein alpha-4 subunit	Ion channel	LGIC	Nicotinic acetylcholine receptor
CHRNA7	28.0571	P36544	CHEMBL2492	Neuronal acetylcholine receptor protein alpha-7 subunit	Ion channel	LGIC	Nicotinic acetylcholine receptor
CHUK	0.321599	O15111	CHEMBL3476	Inhibitor of nuclear factor kappa B kinase alpha subunit	Kinase	Protein Kinase	Other protein kinase group
CISD1	0.227627	Q9NZ45	CHEMBL1795168	CDGSH iron-sulfur domain-containing protein 1	Other	Unclassified protein
CKM	0.553123	P06732	CHEMBL2656	Creatine kinase M	Enzyme	Transferase
COL1A1	0.677633	P02452	CHEMBL2364188	Collagen	Other	Other
COL3A1	0.452823	P02461	CHEMBL2364188	Collagen	Other	Other
CPT2	1.02083	P23786	CHEMBL3238	Carnitine palmitoyltransferase 2	Enzyme	Transferase
CRYZ	0.189503	Q08257	CHEMBL6118	Quinone oxidoreductase	Enzyme	Oxidoreductase
CSNK2A1	0.628163	P68400	CHEMBL3629	Casein kinase II alpha	Kinase	Protein Kinase	Other protein kinase group
CTBP2	0.330532	P56545	CHEMBL3797016	C-terminal-binding protein 2	Other	Unclassified protein
CTDSP1	593.885	Q9GZU7	CHEMBL1795098	Carboxy-terminal domain RNA polymerase II polypeptide A small phosphatase 1	Enzyme	Phosphatase
CTH	4.38194	P32929		Cystathionine gamma-lyase	Enzyme	Lyase
CTNNB1	1.02083	P35222	CHEMBL5866	Catenin beta-1	Other	Unclassified protein
CTRB1	6.92962	P17538	CHEMBL4796	Beta-chymotrypsin	Enzyme	Protease	Serine protease	Serine protease S1A subfamily
CTRC	0.159066	Q99895	CHEMBL2386	Chymotrypsin C	Enzyme	Protease	Serine protease	Serine protease S1A subfamily
CTSB	0.439253	P07858	CHEMBL4072	Cathepsin B	Enzyme	Protease	Cysteine protease	Cysteine protease C1A family
CTSD	3.86991	P07339	CHEMBL2581	Cathepsin D	Enzyme	Protease	Aspartic protease	Aspartic protease A1A subfamily
CTSL	2005.78	P07711	CHEMBL3837	Cathepsin L	Enzyme	Protease	Cysteine protease	Cysteine protease C1A family
CXCR1	0.159066	P25024	CHEMBL4029	Interleukin-8 receptor A	GPCR	Family A GPCR	Peptide receptor (family A GPCR)	CXC chemokine receptor
CYCS	0.730402	P99999	CHEMBL2189163	Cytochrome c	Other	Unclassified protein
CYP19A1	406.753	P11511	CHEMBL1978	Cytochrome P450 19A1	Enzyme	Cytochrome P450	Cytochrome P450 family 19	Cytochrome P450 19A1
CYP1A1	2.03433	P04798	CHEMBL2231	Cytochrome P450 1A1	Enzyme	Cytochrome P450	Cytochrome P450 family 1	Cytochrome P450 1A1
CYP1A2	0.227627	P05177	CHEMBL3356	Cytochrome P450 1A2	Enzyme	Cytochrome P450	Cytochrome P450 family 1	Cytochrome P450 1A2
CYP1B1	2.03433	Q16678	CHEMBL4878	Cytochrome P450 1B1	Enzyme	Cytochrome P450	Cytochrome P450 family 1	Cytochrome P450 1B1
CYP2A6	1.51081	P11509	CHEMBL5282	Cytochrome P450 2A6	Enzyme	Cytochrome P450	Cytochrome P450 family 2	Cytochrome P450 2A6
CYP2B6	2584.2	P20813	CHEMBL4729	Cytochrome P450 2B6	Enzyme	Cytochrome P450	Cytochrome P450 family 2	Cytochrome P450 2B6
CYP2C19	83.2998	P33261	CHEMBL3622	Cytochrome P450 2C19	Enzyme	Cytochrome P450	Cytochrome P450 family 2	Cytochrome P450 2C19
CYP2C8	0.159066	P10632	CHEMBL3721	Cytochrome P450 2C8	Enzyme	Cytochrome P450	Cytochrome P450 family 2	Cytochrome P450 2C8
CYP2C9	83.5274	P11712	CHEMBL3397	Cytochrome P450 2C9	Enzyme	Cytochrome P450	Cytochrome P450 family 2	Cytochrome P450 2C9
CYP2D6	83.9286	P10635	CHEMBL289	Cytochrome P450 2D6	Enzyme	Cytochrome P450	Cytochrome P450 family 2	Cytochrome P450 2D6
CYP3A4	24375.8	P08684	CHEMBL340	Cytochrome P450 3A4	Enzyme	Cytochrome P450	Cytochrome P450 family 3	Cytochrome P450 3A4
DAO	1.39694	P14920	CHEMBL5485	D-amino-acid oxidase	Enzyme	Oxidoreductase
DAPK1	1.27458	P53355	CHEMBL2558	Death-associated protein kinase 1	Kinase	Protein Kinase	CAMK protein kinase group
DDC	0.0352046	P20711	CHEMBL1843	DOPA decarboxylase	Enzyme	Lyase
DDO	1.39694	Q99489	CHEMBL5887	D-aspartate oxidase	Enzyme	Oxidoreductase
DHCR7	0.121204	Q9UBM7	CHEMBL2169735	7-dehydrocholesterol reductase	Enzyme	Oxidoreductase
DHODH	1.02083	Q02127	CHEMBL1966	Dihydroorotate dehydrogenase	Enzyme	Oxidoreductase
DNPEP	0.143616	Q9ULA0	CHEMBL2761	Aspartyl aminopeptidase	Enzyme	Protease	Metallo protease	Metallo protease M18 family
DPP3	1.01327	Q9NY33	CHEMBL4520	Dipeptidyl peptidase III	Enzyme	Protease	Metallo protease	Metallo protease M49 family
DPP4	108.992	P27487	CHEMBL284	Dipeptidyl peptidase IV	Enzyme	Protease	Serine protease	Serine protease S9B subfamily
DRD1	1.24813	P21728	CHEMBL2056	Dopamine D1 receptor	GPCR	Family A GPCR	Small molecule receptor (family A GPCR)	Dopamine receptor
DRD2	2584.2	P14416	CHEMBL217	Dopamine D2 receptor	GPCR	Family A GPCR	Small molecule receptor (family A GPCR)	Dopamine receptor
DRD4	0.187923	P21917	CHEMBL219	Dopamine D4 receptor	GPCR	Family A GPCR	Small molecule receptor (family A GPCR)	Dopamine receptor
DRD5	0.159066	P21918	CHEMBL1850	Dopamine D5 receptor	GPCR	Family A GPCR	Small molecule receptor (family A GPCR)	Dopamine receptor
DUSP3	0.475528	P51452	CHEMBL2635	Dual specificity protein phosphatase 3	Enzyme	Phosphatase	Protein Phosphatase
EGF	0.159066	P01133	CHEMBL5734	Pro-epidermal growth factor	Other	Unclassified protein
EGFR	1.58851	P00533	CHEMBL203	Epidermal growth factor receptor erbB1	Other	Membrane receptor	Other membrane receptor
EGLN1	0.677771	Q9GZT9	CHEMBL5697	Egl nine homolog 1	Enzyme	Oxidoreductase
EHMT2	169.079	Q96KQ7	CHEMBL6032	Histone-lysine N-methyltransferase, H3 lysine-9 specific 3	Other	Epigenetic regulator	Epigenetic Writer
ELANE	0.44552	P08246	CHEMBL248	Leukocyte elastase	Enzyme	Protease	Serine protease	Serine protease S1A subfamily
ENPEP	0.143616	Q07075	CHEMBL3439	Aminopeptidase A	Enzyme	Protease	Metallo protease	Metallo protease M1 family
EPHX2	0.159066	P34913	CHEMBL2409	Epoxide hydratase	Enzyme	Protease	Serine protease	Serine protease S33 family
ESR1	14661.9	P03372	CHEMBL206	Estrogen receptor alpha	Transcription factor	Nuclear receptor	Nuclear hormone receptor subfamily 3	Nuclear hormone receptor subfamily 3 group A member 1
ESR2	84.3344	Q92731	CHEMBL242	Estrogen receptor beta	Transcription factor	Nuclear receptor	Nuclear hormone receptor subfamily 3	Nuclear hormone receptor subfamily 3 group A member 2
ESRRA	13900.8	P11474	CHEMBL3429	Estrogen-related receptor alpha	Transcription factor	Nuclear receptor	Nuclear hormone receptor subfamily 3	Nuclear hormone receptor subfamily 3 group B member 1
F10	2.07707	P00742	CHEMBL244	Coagulation factor X	Enzyme	Protease	Serine protease	Serine protease S1A subfamily
F12	0.281961	P00748	CHEMBL2821	Coagulation factor XII	Enzyme	Protease	Serine protease	Serine protease S1A subfamily
F13A1	1.81342	P00488	CHEMBL4530	Coagulation factor XIII	Enzyme	Transferase	Protein-glutamine glutamyl-transferase
F2	0.790969	P00734	CHEMBL204	Thrombin	Other	Other
F3	1.35429	P13726	CHEMBL4081	Coagulation factor III	Other	Other
F7	1.72286	P08709	CHEMBL3991	Coagulation factor VII	Enzyme	Protease	Serine protease	Serine protease S1A subfamily
FAAH	0.143616	O00519	CHEMBL2243	Anandamide amidohydrolase	Enzyme	Hydrolase
FABP1	0.143616	P07148	CHEMBL5421	Fatty acid-binding protein, liver	Other	Other	Fatty acid binding protein family
FABP2	0.22481	P12104	CHEMBL4879	Fatty acid binding protein intestinal	Other	Other	Fatty acid binding protein family
FABP3	0.325017	P05413	CHEMBL3344	Fatty acid binding protein muscle	Other	Other	Fatty acid binding protein family
FABP4	0.59012	P15090	CHEMBL2083	Fatty acid binding protein adipocyte	Other	Other	Fatty acid binding protein family
FABP5	0.628084	Q01469	CHEMBL3674	Fatty acid binding protein epidermal	Other	Other	Fatty acid binding protein family
FASN	1.89307	P49327	CHEMBL4158	Fatty acid synthase	Enzyme	Lyase
FFAR1	0.434635	O14842	CHEMBL4422	Free fatty acid receptor 1	GPCR	Family A GPCR	Small molecule receptor (family A GPCR)	Free fatty acid receptor
FFAR4	0.262107	Q5NUL3	CHEMBL5339	G-protein coupled receptor 120	GPCR	Family A GPCR	Small molecule receptor (family A GPCR)	Free fatty acid receptor
FLT3	1.40727	P36888	CHEMBL1974	Tyrosine-protein kinase receptor FLT3	Kinase	Protein Kinase	TK protein kinase group
FTO	1.29542	Q9C0B1	CHEMBL2331065	Alpha-ketoglutarate-dependent dioxygenase FTO	Enzyme	Oxidoreductase
FUT6	0.441608	P51993	CHEMBL4443	Fucosyltransferase 6	Enzyme	Transferase
FUT7	1.33285	Q11130	CHEMBL3596077	Alpha-(1,3)-fucosyltransferase 7	Enzyme	Transferase
GAA	0.261305	P10253	CHEMBL2608	Lysosomal alpha-glucosidase	Enzyme	Hydrolase
GABBR1	0.670194	Q9UBS5	CHEMBL2064	GABA-B receptor 1	GPCR	Family C GPCR	Small molecule receptor (family C GPCR)	GABA-B receptor
GABRA1	1.76604	P14867	CHEMBL1962	GABA receptor alpha-1 subunit	Ion channel	LGIC	GABA-A receptor
GABRA2	1.76604	P47869	CHEMBL4956	GABA receptor alpha-2 subunit	Ion channel	LGIC	GABA-A receptor
GABRA3	1.74829	P34903	CHEMBL3026	GABA receptor alpha-3 subunit	Ion channel	LGIC	GABA-A receptor
GABRA4	0.554166	P48169	CHEMBL2472	GABA receptor alpha-4 subunit	Ion channel	LGIC	GABA-A receptor
GABRA5	2.70865	P31644	CHEMBL5112	GABA receptor alpha-5 subunit	Ion channel	LGIC	GABA-A receptor
GABRA6	14.9091	Q16445	CHEMBL2579	GABA receptor alpha-6 subunit	Ion channel	LGIC	GABA-A receptor
GABRR1	0.670194	P24046	CHEMBL3561	GABA receptor rho-1 subunit	Ion channel	LGIC	GABA-A receptor
GABRR3	0.670194	A8MPY1	CHEMBL2109242	GABA-C receptor	Ion channel	LGIC	GABA-A receptor
GALE	1.81342	Q14376	CHEMBL5843	UDP-glucose 4-epimerase	Enzyme	Isomerase
GAPDH	15823.2	P04406	CHEMBL2284	Glyceraldehyde-3-phosphate dehydrogenase liver	Enzyme	Oxidoreductase
GARS	1.02083	P41250	CHEMBL4105815	Glycine--tRNA ligase	Enzyme	Ligase
GATM	7.01172	P50440		Glycine amidinotransferase, mitochondrial	Enzyme	Transferase
GCAT	1.81342	O75600		2-amino-3-ketobutyrate coenzyme A ligase, mitochondrial	Enzyme	Transferase
GCLC	0.236484	P48506	CHEMBL4055	Gamma-glutamylcysteine synthetase	Enzyme	Ligase
GJA1	83.2998	P17302		Gap junction alpha-1 protein	Other	Unclassified protein
GLDC	1.02083	P23378		Glycine dehydrogenase (decarboxylating), mitochondrial	Enzyme	Oxidoreductase
GLI3	13900.5	P10071		Transcriptional activator GLI3	Other	Unclassified protein
GLIPR2	1.16128	Q9H4G4		Golgi-associated plant pathogenesis-related protein 1	Other	Unclassified protein
GLO1	0.805482	Q04760	CHEMBL2424	Glyoxalase I	Enzyme	Lyase
GLP1R	12.7491	P43220	CHEMBL1784	Glucagon-like peptide 1 receptor	GPCR	Family B GPCR	Peptide receptor (family B GPCR)	Glucagon-like peptide receptor
GLRA1	2.38615	P23415	CHEMBL5845	Glycine receptor subunit alpha-1	Ion channel	LGIC	Glycine receptor
GLRA2	1.02083	P23416	CHEMBL5871	Glycine receptor subunit alpha-2	Ion channel	LGIC	Glycine receptor
GLRA3	1.02083	O75311	CHEMBL1075092	Glycine receptor subunit alpha-3	Ion channel	LGIC	Glycine receptor
GLUD1	2.51125	P00367		Glutamate dehydrogenase 1, mitochondrial	Enzyme	Oxidoreductase
GLUD2	1.57395	P49448		Glutamate dehydrogenase 2, mitochondrial	Enzyme	Oxidoreductase
GLYAT	1.02083	Q6IB77		Glycine N-acyltransferase	Enzyme	Transferase
GLYATL1	1.02083	Q969I3		Glycine N-acyltransferase-like protein 1	Enzyme	Transferase
GMNN	95.8898	O75496	CHEMBL1293278	Geminin	Other	Unclassified protein
GNAO1	83.1407	P09471	CHEMBL4742	Guanine nucleotide-binding protein G(o), alpha subunit 1	Other	Other
GNMT	1.02083	Q14749		Glycine N-methyltransferase	Enzyme	Transferase
GOT1	3.15256	P17174	CHEMBL2189139	Aspartate aminotransferase, cytoplasmic	Enzyme	Transferase
GOT2	4.48795	P00505		Aspartate aminotransferase, mitochondrial	Enzyme	Transferase
GPBAR1	0.37315	Q8TDU6	CHEMBL5409	G-protein coupled bile acid receptor 1	GPCR	Family A GPCR	Small molecule receptor (family A GPCR)	Steroid-like ligand receptor
GPHN	1.02083	Q9NQX3		Gephyrin	Enzyme	Transferase
GPI	1.02083	P06744		Glucose-6-phosphate isomerase	Enzyme	Isomerase
GPR35	0.577855	Q9HC97	CHEMBL1293267	G-protein coupled receptor 35	GPCR	Family A GPCR	Small molecule receptor (family A GPCR)	Kynurenic acid receptor
GPT	3.70646	P24298	CHEMBL5929	Alanine aminotransferase 1	Enzyme	Transferase
GPT2	1497.66	Q8TD30		Alanine aminotransferase 2	Enzyme	Transferase
GRIA1	2.09479	P42261	CHEMBL2009	Glutamate receptor ionotropic, AMPA 1	Ion channel	LGIC	Ionotropic glutamate receptor
GRIA2	7.92729	P42262	CHEMBL4016	Glutamate receptor ionotropic, AMPA 2	Ion channel	LGIC	Ionotropic glutamate receptor
GRIA3	0.520836	P42263	CHEMBL3595	Glutamate receptor ionotropic, AMPA 3	Ion channel	LGIC	Ionotropic glutamate receptor
GRIA4	0.520836	P48058	CHEMBL3190	Glutamate receptor ionotropic, AMPA 4	Ion channel	LGIC	Ionotropic glutamate receptor
GRIK2	2.09479	Q13002	CHEMBL3683	Glutamate receptor ionotropic kainate 2	Ion channel	LGIC	Ionotropic glutamate receptor
GRIK3	0.520836	Q13003	CHEMBL3684	Glutamate receptor ionotropic kainate 3	Ion channel	LGIC	Ionotropic glutamate receptor
GRIK5	0.520836	Q16478	CHEMBL2675	Glutamate receptor ionotropic kainate 5	Ion channel	LGIC	Ionotropic glutamate receptor
GRIN1	2.99752	Q05586	CHEMBL2015	Glutamate (NMDA) receptor subunit zeta 1	Ion channel	LGIC	Ionotropic glutamate receptor
GRIN2A	1.54167	Q12879	CHEMBL1972	Glutamate [NMDA] receptor subunit epsilon 1	Ion channel	LGIC	Ionotropic glutamate receptor
GRIN2B	1.02083	Q13224	CHEMBL1904	Glutamate [NMDA] receptor subunit epsilon 2	Ion channel	LGIC	Ionotropic glutamate receptor
GRIN3A	1.68741	Q8TCU5	CHEMBL4787	Glutamate [NMDA] receptor subunit 3A	Ion channel	LGIC	Ionotropic glutamate receptor
GRK2	593.657	P25098	CHEMBL4079	G-protein coupled receptor kinase 2	Kinase	Protein Kinase	AGC protein kinase group	AGC protein kinase BARK subfamily
GRM1	1.07396	Q13255	CHEMBL3772	Metabotropic glutamate receptor 1	GPCR	Family C GPCR	Small molecule receptor (family C GPCR)	Metabotropic glutamate receptor
GRM2	1.07396	Q14416	CHEMBL5137	Metabotropic glutamate receptor 2	GPCR	Family C GPCR	Small molecule receptor (family C GPCR)	Metabotropic glutamate receptor
GRM3	0.520836	Q14832	CHEMBL2888	Metabotropic glutamate receptor 3	GPCR	Family C GPCR	Small molecule receptor (family C GPCR)	Metabotropic glutamate receptor
GRM4	0.520836	Q14833	CHEMBL2736	Metabotropic glutamate receptor 4	GPCR	Family C GPCR	Small molecule receptor (family C GPCR)	Metabotropic glutamate receptor
GRM5	0.520836	P41594	CHEMBL3227	Metabotropic glutamate receptor 5	GPCR	Family C GPCR	Small molecule receptor (family C GPCR)	Metabotropic glutamate receptor
GRM6	1.07396	O15303	CHEMBL4573	Metabotropic glutamate receptor 6	GPCR	Family C GPCR	Small molecule receptor (family C GPCR)	Metabotropic glutamate receptor
GRM7	0.520836	Q14831	CHEMBL3777	Metabotropic glutamate receptor 7	GPCR	Family C GPCR	Small molecule receptor (family C GPCR)	Metabotropic glutamate receptor
GRM8	0.520836	O00222	CHEMBL3228	Metabotropic glutamate receptor 8	GPCR	Family C GPCR	Small molecule receptor (family C GPCR)	Metabotropic glutamate receptor
GSK3B	1.15838	P49841	CHEMBL262	Glycogen synthase kinase-3 beta	Kinase	Protein Kinase	CMGC protein kinase group
GSR	0.812594	P00390	CHEMBL2755	Glutathione reductase	Enzyme	Oxidoreductase
GSTA1	2584.2	P08263	CHEMBL3409	Glutathione S-transferase A1	Enzyme	Transferase
GSTA2	0.236484	P09210	CHEMBL2241	Glutathione S-transferase A2	Enzyme	Transferase
GSTM1	0.536821	P09488	CHEMBL2081	Glutathione S-transferase Mu 1	Enzyme	Transferase
GSTM2	0.386693	P28161	CHEMBL4589	Glutathione S-transferase Mu 2	Enzyme	Transferase
GSTO1	2005.18	P78417	CHEMBL3174	Glutathione transferase omega 1	Enzyme	Transferase
GSTP1	1.91557	P09211	CHEMBL3902	Glutathione S-transferase Pi	Enzyme	Transferase
GUSB	1.16128	P08236	CHEMBL2728	Beta-glucuronidase	Enzyme	Hydrolase
GYS1	1.02083	P13807	CHEMBL4000	Muscle glycogen synthase	Enzyme	Transferase
HBEGF	0.0791175	Q99075	CHEMBL3286070	Proheparin-binding EGF-like growth factor	Other	Unclassified protein
HCAR2	0.847841	Q8TDS4	CHEMBL3785	Hydroxycarboxylic acid receptor 2	GPCR	Family A GPCR	Small molecule receptor (family A GPCR)	Hydroxycarboxylic acid receptor
HCAR3	0.505455	P49019	CHEMBL4421	HM74 nicotinic acid GPCR	GPCR	Family A GPCR	Small molecule receptor (family A GPCR)	Hydroxycarboxylic acid receptor
HCRTR1	18961.9	O43613	CHEMBL5113	Orexin receptor 1	GPCR	Family A GPCR	Peptide receptor (family A GPCR)	Orexin receptor
HIF1A	13900.5	Q16665	CHEMBL4261	Hypoxia-inducible factor 1 alpha	Transcription factor	Other
HIF1AN	0.159066	Q9NWT6	CHEMBL5909	Hypoxia-inducible factor 1-alpha inhibitor	Enzyme	Oxidoreductase
HMGCR	0.710929	P04035	CHEMBL402	HMG-CoA reductase	Enzyme	Oxidoreductase
HMOX1	1498.02	P09601	CHEMBL2823	Heme oxygenase 1	Enzyme	Oxidoreductase
HNF4A	0.38654	P41235	CHEMBL5398	Hepatocyte nuclear factor 4-alpha	Other	Unclassified protein
HOXA9	4589.38	P31269		Homeobox protein Hox-A9	Other	Unclassified protein
HPSE	762.736	Q9Y251	CHEMBL3921	Heparanase	Enzyme	Hydrolase
HSD11B1	1579.9	P28845	CHEMBL4235	11-beta-hydroxysteroid dehydrogenase 1	Enzyme	Oxidoreductase
HSD11B2	1579.82	P80365	CHEMBL3746	11-beta-hydroxysteroid dehydrogenase 2	Enzyme	Other Enzyme
HSD17B1	84.0426	P14061	CHEMBL3181	Estradiol 17-beta-dehydrogenase 1	Enzyme	Oxidoreductase
HSD17B2	84.2016	P37059	CHEMBL2789	Estradiol 17-beta-dehydrogenase 2	Enzyme	Oxidoreductase
HSD17B3	0.730402	P37058	CHEMBL4234	Estradiol 17-beta-dehydrogenase 3	Enzyme	Oxidoreductase
HSF1	0.159066	Q00613	CHEMBL5869	Heat shock factor protein 1	Other	Other
HSP90AA1	1.23484	P07900	CHEMBL3880	Heat shock protein HSP 90-alpha	Other	Other
HSP90AB1	0.500395	P08238	CHEMBL4303	Heat shock protein HSP 90-beta	Other	Other
HSPA1A	0.0585494	P0DMV8	CHEMBL5460	Heat shock 70 kDa protein 1	Other	Other
HSPA5	0.261497	P11021	CHEMBL1781865	78 kDa glucose-regulated protein	Enzyme	Hydrolase
HSPA8	0.0150114	P11142	CHEMBL1275223	Heat shock cognate 71 kDa protein	Other	Other
HSPB1	83.1407	P04792	CHEMBL5976	Heat shock protein beta-1	Other	Other
HTR1A	0.505366	P08908	CHEMBL214	Serotonin 1a (5-HT1a) receptor	GPCR	Family A GPCR	Small molecule receptor (family A GPCR)	Serotonin receptor
HTR1D	0.159066	P28221	CHEMBL1983	Serotonin 1d (5-HT1d) receptor	GPCR	Family A GPCR	Small molecule receptor (family A GPCR)	Serotonin receptor
HTR2A	0.180296	P28223	CHEMBL224	Serotonin 2a (5-HT2a) receptor	GPCR	Family A GPCR	Small molecule receptor (family A GPCR)	Serotonin receptor
HTR2B	13817.4	P41595	CHEMBL1833	Serotonin 2b (5-HT2b) receptor	GPCR	Family A GPCR	Small molecule receptor (family A GPCR)	Serotonin receptor
HTR3A	0.386258	P46098	CHEMBL1899	Serotonin 3a (5-HT3a) receptor	Ion channel	LGIC	5HT3 receptor
HTR5A	0.159066	P47898	CHEMBL3426	Serotonin 5a (5-HT5a) receptor	GPCR	Family A GPCR	Small molecule receptor (family A GPCR)	Serotonin receptor
HTR6	0.159066	P50406	CHEMBL3371	Serotonin 6 (5-HT6) receptor	GPCR	Family A GPCR	Small molecule receptor (family A GPCR)	Serotonin receptor
HTR7	0.42037	P34969	CHEMBL3155	Serotonin 7 (5-HT7) receptor	GPCR	Family A GPCR	Small molecule receptor (family A GPCR)	Serotonin receptor
HYAL1	0.850804	Q12794	CHEMBL4528	Hyaluronidase-1	Enzyme	Hydrolase
IDH1	82.7837	O75874	CHEMBL2007625	Isocitrate dehydrogenase [NADP] cytoplasmic	Enzyme	Oxidoreductase
IDO1	0.321599	P14902	CHEMBL4685	Indoleamine 2,3-dioxygenase	Enzyme	Oxidoreductase
IFNB1	1.16128	P01574		Interferon beta	Other	Other
IFNG	1.6953	P01579	CHEMBL3286073	Interferon gamma	Other	Other
IGF1R	0.159066	P08069	CHEMBL1957	Insulin-like growth factor I receptor	Kinase	Protein Kinase	TK protein kinase group
IGHG1	9.37506	P01857		Immunoglobulin heavy constant gamma 1	Other	Unclassified protein
IGHG2	0.26183	P01859		Immunoglobulin heavy constant gamma 2	Other	Unclassified protein
IKBKB	1.02083	O14920	CHEMBL1991	Inhibitor of nuclear factor kappa B kinase beta subunit	Kinase	Protein Kinase	Other protein kinase group
IL1B	12.823	P01584	CHEMBL1909490	Interleukin-1 beta	Other	Other
IL2	3.51926	P60568	CHEMBL5880	Interleukin-2	Other	Other
IL6	0.901556	P05231	CHEMBL1795129	Interleukin-6	Other	Other
IMPDH1	0.0150114	P20839	CHEMBL1822	Inosine-5'-monophosphate dehydrogenase 1	Enzyme	Oxidoreductase
IMPDH2	0.0150114	P12268	CHEMBL2002	Inosine-5'-monophosphate dehydrogenase 2	Enzyme	Oxidoreductase
INPP5D	3.43711	Q92835	CHEMBL1781870	Phosphatidylinositol-3,4,5-trisphosphate 5-phosphatase 1	Enzyme	Phosphatase
INPPL1	3.43711	O15357	CHEMBL2331064	Phosphatidylinositol 3,4,5-trisphosphate 5-phosphatase 2	Enzyme	Phosphatase
INS	0.68659	P01308	CHEMBL5881	Insulin	Other	Other
INSR	1.01327	P06213	CHEMBL1981	Insulin receptor	Kinase	Protein Kinase	TK protein kinase group
ITGB2	0.0738773	P05107	CHEMBL3631	Integrin beta-2	Other	Membrane receptor	Other membrane receptor
JAK2	2032.71	O60674	CHEMBL2971	Tyrosine-protein kinase JAK2	Kinase	Protein Kinase	TK protein kinase group	Kinase	Protein Kinase	TK protein kinase group	Tyrosine protein kinase JakB family
JUN	83.5258	P05412	CHEMBL4977	Proto-oncogene c-JUN	Transcription factor	Other
KCNH2	13942.1	Q12809	CHEMBL240	HERG	Ion channel	VGIC	Potassium channels
KCNJ11	13817.4	Q14654	CHEMBL1886	Potassium channel, inwardly rectifying, subfamily J, member 11	Ion channel	VGIC	Potassium channels
KCNJ3	169.079	P48549	CHEMBL3038488	Kir3.1/Kir3.4	Ion channel	VGIC	Potassium channels
KCNJ5	169.079	P48544	CHEMBL3038488	Kir3.1/Kir3.4	Ion channel	VGIC	Potassium channels
KCNMA1	4.53844	Q12791	CHEMBL4304	Calcium-activated potassium channel subunit alpha-1	Ion channel	VGIC	Potassium channels
KDM4E	0.677771	B2RXH2	CHEMBL1293226	Lysine-specific demethylase 4D-like	Other	Epigenetic regulator	Epigenetic Eraser	Jumonji domain-containing
KDR	0.435257	P35968	CHEMBL279	Vascular endothelial growth factor receptor 2	Kinase	Protein Kinase	TK protein kinase group
KLK7	0.161504	P49862	CHEMBL2443	Kallikrein 7	Enzyme	Protease	Serine protease	Serine protease S1A subfamily
KYNU	1.64992	Q16719	CHEMBL5100	Kynureninase	Enzyme	Hydrolase
LCK	0.785648	P06239	CHEMBL258	Tyrosine-protein kinase LCK	Kinase	Protein Kinase	TK protein kinase group
LCT	0.687804	P09848	CHEMBL1075131	Lactase-phlorizin hydrolase	Enzyme	Hydrolase
LDHA	1.81342	P00338	CHEMBL4835	L-lactate dehydrogenase A chain	Enzyme	Oxidoreductase
LDHB	1.81342	P07195	CHEMBL4940	L-lactate dehydrogenase B chain	Enzyme	Oxidoreductase
LDLR	0.132693	P01130	CHEMBL3311	LDL receptor	Other	Membrane receptor	Other membrane receptor
LMNA	83.1407	P02545	CHEMBL1293235	Prelamin-A/C	Other	Unclassified protein
LPL	0.143616	P06858	CHEMBL2060	Lipoprotein lipase	Enzyme	Hydrolase
LTA4H	2.44562	P09960	CHEMBL4618	Leukotriene A4 hydrolase	Enzyme	Protease	Metallo protease	Metallo protease M1 family
LTF	1.02083	P02788		Lactotransferrin	Other	Unclassified protein
LY96	0.097519	Q9Y6Y9	CHEMBL2375202	Lymphocyte antigen 96	Other	Other
MAN2A1	0.26183	Q16706	CHEMBL4056	Alpha-mannosidase 2A1	Enzyme	Hydrolase
MAOA	4.1337	P21397	CHEMBL1951	Monoamine oxidase A	Enzyme	Oxidoreductase
MAOB	3.46218	P27338	CHEMBL2039	Monoamine oxidase B	Enzyme	Oxidoreductase
MAP2	0.268119	P11137	CHEMBL2390810	Microtubule-associated protein 2	Other	Unclassified protein
MAPK1	0.290177	P28482	CHEMBL4040	MAP kinase ERK2	Kinase	Protein Kinase	CMGC protein kinase group	CMGC protein kinase ERK subfamily
MAPK10	2.2754	P53779	CHEMBL2637	c-Jun N-terminal kinase 3	Kinase	Protein Kinase	CMGC protein kinase group	CMGC protein kinase JNK subfamily
MAPK14	1.84015	Q16539	CHEMBL260	MAP kinase p38 alpha	Kinase	Protein Kinase	CMGC protein kinase group	CMGC protein kinase p38 subfamily
MAPK3	0.132693	P27361	CHEMBL3385	MAP kinase ERK1	Kinase	Protein Kinase	CMGC protein kinase group	CMGC protein kinase ERK subfamily
MAPK8	0.413999	P45983	CHEMBL2276	c-Jun N-terminal kinase 1	Kinase	Protein Kinase	CMGC protein kinase group	CMGC protein kinase JNK subfamily
MAPT	15905.7	P10636	CHEMBL1293224	Microtubule-associated protein tau	Other	Unclassified protein
MARS	1.57395	P56192	CHEMBL2870	Methionyl-tRNA synthetase	Enzyme	Ligase
MAT1A	2.13173	Q00266		S-adenosylmethionine synthase isoform type-1	Enzyme	Transferase
MAT2A	0.969589	P31153	CHEMBL3313835	S-adenosylmethionine synthase isoform type-2	Enzyme	Transferase
MCL1	2005.18	Q07820	CHEMBL4361	Induced myeloid leukemia cell differentiation protein Mcl-1	Other	Other
MDM2	12.7491	Q00987	CHEMBL5023	p53-binding protein Mdm-2	Other	Other
MDM4	12.7491	O15151	CHEMBL1255126	Protein Mdm4	Other	Unclassified protein
ME1	1.81342	P48163	CHEMBL3495	NADP-dependent malic enzyme	Enzyme	Oxidoreductase
ME2	6.5365	P23368		NAD-dependent malic enzyme, mitochondrial	Enzyme	Oxidoreductase
ME3	4.81935	Q16798	CHEMBL6182	NADP-dependent malic enzyme, mitochondrial	Enzyme	Oxidoreductase
MET	0.31655	P08581	CHEMBL3717	Hepatocyte growth factor receptor	Kinase	Protein Kinase	TK protein kinase group
MGAM	0.607483	O43451	CHEMBL2074	Maltase-glucoamylase	Enzyme	Hydrolase
MGST1	0.441608	P10620	CHEMBL1743184	Microsomal glutathione S-transferase 1	Enzyme	Transferase
MITF	12.7491	O75030	CHEMBL1741165	Microphthalmia-associated transcription factor	Transcription factor	Other
MMP1	1.6091	P03956	CHEMBL332	Matrix metalloproteinase-1	Enzyme	Protease	Metallo protease	Metallo protease M10A subfamily
MMP10	0.0791175	P09238	CHEMBL4270	Matrix metalloproteinase 10	Enzyme	Protease	Metallo protease	Metallo protease M10A subfamily
MMP12	1.33738	P39900	CHEMBL4393	Matrix metalloproteinase 12	Enzyme	Protease	Metallo protease	Metallo protease M10A subfamily
MMP13	0.31655	P45452	CHEMBL280	Matrix metalloproteinase 13	Enzyme	Protease	Metallo protease	Metallo protease M10A subfamily
MMP2	342.128	P08253	CHEMBL333	Matrix metalloproteinase-2	Enzyme	Protease	Metallo protease	Metallo protease M10A subfamily
MMP3	1.8574	P08254	CHEMBL283	Matrix metalloproteinase 3	Enzyme	Protease	Metallo protease	Metallo protease M10A subfamily
MMP7	0.441608	P09237	CHEMBL4073	Matrix metalloproteinase 7	Enzyme	Protease	Metallo protease	Metallo protease M10A subfamily
MMP8	1.02083	P22894	CHEMBL4588	Matrix metalloproteinase 8	Enzyme	Protease	Metallo protease	Metallo protease M10A subfamily
MMP9	0.691871	P14780	CHEMBL321	Matrix metalloproteinase 9	Enzyme	Protease	Metallo protease	Metallo protease M10A subfamily
MPI	2005.56	P34949	CHEMBL2758	Mannose-6-phosphate isomerase	Enzyme	Isomerase
MPO	1497.2	P05164	CHEMBL2439	Myeloperoxidase	Enzyme	Oxidoreductase
MS4A2	0.469097	Q01362		High affinity immunoglobulin epsilon receptor subunit beta	Other	Unclassified protein
MT-ND6	0.373667	P03923	CHEMBL2363065	Mitochondrial complex I (NADH dehydrogenase)	Enzyme	Oxidoreductase
MTR	1.02083	Q99707	CHEMBL2150844	Methionine synthase	Enzyme	Transferase
NAGS	1.02083	Q8N159		N-acetylglutamate synthase, mitochondrial	Enzyme	Transferase
NCOA1	4.98007	Q15788	CHEMBL1615387	Nuclear receptor coactivator 1	Other	Epigenetic regulator	Epigenetic Writer	SRC family
NCOA2	55.4885	Q15596	CHEMBL2095163	Peroxisome proliferator-activated receptor gamma/Nuclear receptor coactivator 2	Transcription factor	Nuclear receptor	Nuclear hormone receptor subfamily 1	Nuclear hormone receptor subfamily 1 group C member 3,- Epigenetic regulator	Writer	Histone acetyltransferase	SRC family
NEK2	0.159066	P51955	CHEMBL3835	Serine/threonine-protein kinase NEK2	Kinase	Protein Kinase	Other protein kinase group
NEK6	0.159066	Q9HC98	CHEMBL4309	Serine/threonine-protein kinase NEK6	Kinase	Protein Kinase	Other protein kinase group
NEU2	1.27458	Q9Y3R4	CHEMBL3200	Sialidase 2	Enzyme	Hydrolase
NFE2L2	13913.3	Q16236	CHEMBL1075094	Nuclear factor erythroid 2-related factor 2	Other	Unclassified protein
NFKB1	1.16128	P19838	CHEMBL3251	Nuclear factor NF-kappa-B p105 subunit	Other	Other
NFS1	3.18563	Q9Y697		Cysteine desulfurase, mitochondrial	Enzyme	Transferase
NMUR2	702.27	Q9GZQ4	CHEMBL1075144	Neuromedin-U receptor 2	GPCR	Family A GPCR	Peptide receptor (family A GPCR)	Neuromedin U receptor
NOS1	4.04183	P29475	CHEMBL3568	Nitric-oxide synthase, brain	Enzyme	Oxidoreductase
NOS2	0.585789	P35228	CHEMBL4481	Nitric oxide synthase, inducible	Enzyme	Oxidoreductase
NOS3	0.407855	P29474	CHEMBL4803	Nitric-oxide synthase, endothelial	Enzyme	Oxidoreductase
NOX4	1.01327	Q9NPH5	CHEMBL1250375	NADPH oxidase 4	Enzyme	Other Enzyme
NPSR1	2005.18	Q6W5P4	CHEMBL5162	Neuropeptide S receptor	GPCR	Family A GPCR	Peptide receptor (family A GPCR)	Neuropeptide receptor
NQO1	0.284091	P15559	CHEMBL3623	Quinone reductase 1)	Enzyme	Oxidoreductase
NQO2	0.383114	P16083	CHEMBL3959	Quinone reductase 2	Enzyme	Oxidoreductase
NR1H4	83.1407	Q96RI1	CHEMBL2047	Bile acid receptor FXR	Transcription factor	Nuclear receptor	Nuclear hormone receptor subfamily 1	Nuclear hormone receptor subfamily 1 group H member 4
NR1I2	2584.36	O75469	CHEMBL3401	Pregnane X receptor	Transcription factor	Nuclear receptor	Nuclear hormone receptor subfamily 1	Nuclear hormone receptor subfamily 1 group I member 2
NR2F2	13817.4	P24468	CHEMBL1961790	COUP transcription factor 2	Transcription factor	Nuclear receptor	Nuclear hormone receptor subfamily 2	Nuclear hormone receptor subfamily 2 group F member 2
NR3C1	2340.92	P04150	CHEMBL2034	Glucocorticoid receptor	Transcription factor	Nuclear receptor	Nuclear hormone receptor subfamily 3	Nuclear hormone receptor subfamily 3 group C member 1
NR3C2	0.458955	P08235	CHEMBL1994	Mineralocorticoid receptor	Transcription factor	Nuclear receptor	Nuclear hormone receptor subfamily 3	Nuclear hormone receptor subfamily 3 group C member 2
NTRK2	0.143616	Q16620	CHEMBL4898	Neurotrophic tyrosine kinase receptor type 2	Kinase	Protein Kinase	TK protein kinase group
NUAK1	0.159066	O60285	CHEMBL5784	NUAK family SNF1-like kinase 1	Kinase	Protein Kinase	CAMK protein kinase group	CAMK protein kinase NuaK subfamily
OAT	2.85897	P04181	CHEMBL5954	Ornithine aminotransferase, mitochondrial	Enzyme	Transferase
ODC1	0.628163	P11926	CHEMBL1869	Ornithine decarboxylase	Enzyme	Lyase
OPLAH	1.02083	O14841		5-oxoprolinase	Enzyme	Hydrolase
OPRK1	0.159066	P41145	CHEMBL237	Kappa opioid receptor	GPCR	Family A GPCR	Peptide receptor (family A GPCR)	Opioid receptor
OPRM1	0.427184	P35372	CHEMBL233	Mu opioid receptor	GPCR	Family A GPCR	Peptide receptor (family A GPCR)	Opioid receptor
OTC	2.13173	P00480	CHEMBL2222	Ornithine carbamoyltransferase	Enzyme	Transferase
OXCT2	0.416466	Q9BYC2		Succinyl-CoA:3-ketoacid coenzyme A transferase 2, mitochondrial	Enzyme	Transferase
OXTR	0.159066	P30559	CHEMBL2049	Oxytocin receptor	GPCR	Family A GPCR	Peptide receptor (family A GPCR)	Vasopressin and oxytocin receptor
P2RX2	0.043538	Q9UBL9	CHEMBL2531	P2X purinoceptor 2	Ion channel	LGIC	P2X receptor
P2RX3	0.043538	P56373	CHEMBL2998	P2X purinoceptor 3	Ion channel	LGIC	P2X receptor
P2RY1	0.043538	P47900	CHEMBL4315	Purinergic receptor P2Y1	GPCR	Family A GPCR	Small molecule receptor (family A GPCR)	Purine receptor
P2RY11	0.043538	Q96G91	CHEMBL4867	Purinergic receptor P2Y11	GPCR	Family A GPCR	Small molecule receptor (family A GPCR)	Purine receptor
P2RY2	0.043538	P41231	CHEMBL4398	Purinergic receptor P2Y2	GPCR	Family A GPCR	Small molecule receptor (family A GPCR)	Purine receptor
P3H1	0.416466	Q32P28		Prolyl 3-hydroxylase 1	Enzyme	Oxidoreductase
P3H3	0.969589	Q8IVL6		Prolyl 3-hydroxylase 3	Enzyme	Oxidoreductase
P4HA2	0.416466	O15460	CHEMBL5640	Prolyl 4-hydroxylase subunit alpha-2	Enzyme	Oxidoreductase
P4HB	601.082	P07237	CHEMBL5422	Protein disulfide-isomerase	Enzyme	Isomerase
PAM	0.143616	P19021	CHEMBL2544	Peptidyl-glycine alpha-amidating monooxygenase	Enzyme	Lyase
PARP1	0.626582	P09874	CHEMBL3105	Poly [ADP-ribose] polymerase-1	Enzyme	Transferase
PBRM1	0.157485	Q86U86	CHEMBL1795184	Protein polybromo-1	Other	Epigenetic regulator	Epigenetic Reader
PC	1.02083	P11498		Pyruvate carboxylase, mitochondrial	Enzyme	Ligase
PCYT1A	0.22481	P49585	CHEMBL4105855	Choline-phosphate cytidylyltransferase A	Enzyme	Transferase
PDE10A	0.167089	Q9Y233	CHEMBL4409	Phosphodiesterase 10A	Enzyme	Phosphodiesterase	Phosphodiesterase 10
PDE4A	0.315593	P27815	CHEMBL254	Phosphodiesterase 4A	Enzyme	Phosphodiesterase	Phosphodiesterase 4
PDGFRB	30.3517	P09619	CHEMBL1913	Platelet-derived growth factor receptor beta	Kinase	Protein Kinase	TK protein kinase group
PDHB	1.02083	P11177		Pyruvate dehydrogenase E1 component subunit beta, mitochondrial	Enzyme	Oxidoreductase
PDPK1	0.097519	O15530	CHEMBL2534	3-phosphoinositide dependent protein kinase-1	Kinase	Protein Kinase	AGC protein kinase group
PFAS	1.02083	O15067		Phosphoribosylformylglycinamidine synthase	Enzyme	Ligase
PGR	83.7204	P06401	CHEMBL208	Progesterone receptor	Transcription factor	Nuclear receptor	Nuclear hormone receptor subfamily 3	Nuclear hormone receptor subfamily 3 group C member 3
PHYKPL	1.81342	Q8IUZ5		5-phosphohydroxy-L-lysine phospho-lyase	Enzyme	Lyase
PIK3CG	0.920985	P48736	CHEMBL3267	PI3-kinase p110-gamma subunit	Enzyme	Transferase
PIK3R1	0.159066	P27986	CHEMBL2506	PI3-kinase p85-alpha subunit	Enzyme	Other Enzyme
PIM1	37.3334	P11309	CHEMBL2147	Serine/threonine-protein kinase PIM1	Kinase	Protein Kinase	CAMK protein kinase group
PIPOX	1.02083	Q9P0Z9	CHEMBL2254	Peroxisomal sarcosine oxidase	Enzyme	Oxidoreductase
PKIA	186.036	P61925		cAMP-dependent protein kinase inhibitor alpha	Other	Unclassified protein
PKLR	1.81342	P30613	CHEMBL1075126	Pyruvate kinase isozymes R/L	Enzyme	Transferase
PKM	3.4121	P14618	CHEMBL1075189	Pyruvate kinase isozymes M1/M2	Enzyme	Transferase
PKN1	0.159066	Q16512	CHEMBL3384	Protein kinase N1	Kinase	Protein Kinase	AGC protein kinase group
PLA2G1B	2.06452	P04054	CHEMBL4426	Phospholipase A2 group 1B	Enzyme	Hydrolase
PLA2G2E	2.37158	Q9NZK7	CHEMBL2154	Group IIE secretory phospholipase A2	Enzyme	Hydrolase
PLA2G4A	0.107255	P47712	CHEMBL3816	Cytosolic phospholipase A2	Enzyme	Hydrolase
PLAA	0.584192	Q9Y263	CHEMBL6114	Phospholipase A-2-activating protein	Other	Unclassified protein
PLAT	0.159066	P00750	CHEMBL1873	Tissue-type plasminogen activator	Enzyme	Protease	Serine protease	Serine protease S1A subfamily
PLAU	2.16253	P00749	CHEMBL3286	Urokinase-type plasminogen activator	Enzyme	Protease	Serine protease	Serine protease S1A subfamily
PLG	14.6846	P00747	CHEMBL1801	Plasminogen	Enzyme	Protease	Serine protease	Serine protease S1A subfamily
PLIN1	0.22464	O60240	CHEMBL1741164	Perilipin-1	Other	Unclassified protein
PLIN5	0.22464	Q00G26	CHEMBL3885501	1-acylglycerol-3-phosphate O-acyltransferase ABHD5/Perilipin-5	Enzyme	Other Enzyme
PLK1	83.2998	P53350	CHEMBL3024	Serine/threonine-protein kinase PLK1	Kinase	Protein Kinase	Other protein kinase group
PNP	1.02667	P00491	CHEMBL4338	Purine nucleoside phosphorylase	Enzyme	Transferase
POLB	2006.19	P06746	CHEMBL2392	DNA polymerase beta	Enzyme	Transferase
POLI	2005.18	Q9UNA4	CHEMBL5391	DNA polymerase iota	Enzyme	Transferase
POLK	83.1407	Q9UBT6	CHEMBL5365	DNA polymerase kappa	Enzyme	Transferase
PON1	1.73208	P27169	CHEMBL3167	Serum paraoxonase/arylesterase 1	Enzyme	Hydrolase
POR	0.232943	P16435	CHEMBL2169731	NADPH--cytochrome P450 reductase	Enzyme	Oxidoreductase
PPARA	0.0791175	Q07869	CHEMBL239	Peroxisome proliferator-activated receptor alpha	Transcription factor	Nuclear receptor	Nuclear hormone receptor subfamily 1	Nuclear hormone receptor subfamily 1 group C member 1
PPARD	83.4703	Q03181	CHEMBL3979	Peroxisome proliferator-activated receptor delta	Transcription factor	Nuclear receptor	Nuclear hormone receptor subfamily 1	Nuclear hormone receptor subfamily 1 group C member 2
PPARG	83.4617	P37231	CHEMBL235	Peroxisome proliferator-activated receptor gamma	Transcription factor	Nuclear receptor	Nuclear hormone receptor subfamily 1	Nuclear hormone receptor subfamily 1 group C member 2
PPP3CA	0.417131	Q08209	CHEMBL4445	Serine/threonine protein phosphatase 2B catalytic subunit, alpha isoform	Enzyme	Phosphatase	Protein Phosphatase
PREP	13818.1	P48147	CHEMBL3202	Prolyl endopeptidase	Enzyme	Protease	Serine protease	Serine protease S9A subfamily
PRKCA	86.3427	P17252	CHEMBL299	Protein kinase C alpha	Kinase	Protein Kinase	AGC protein kinase group	AGC protein kinase PKC alpha subfamily
PRKCB	83.1557	P05771	CHEMBL3045	Protein kinase C beta	Kinase	Protein Kinase	AGC protein kinase group	AGC protein kinase PKC alpha subfamily
PRKCD	83.1407	Q05655	CHEMBL2996	Protein kinase C delta	Kinase	Protein Kinase	AGC protein kinase group	AGC protein kinase PKC delta subfamily
PRKCH	83.1407	P24723	CHEMBL3616	Protein kinase C eta	Kinase	Protein Kinase	AGC protein kinase group	AGC protein kinase PKC eta subfamily
PRKCQ	0.097519	Q04759	CHEMBL3920	Protein kinase C theta	Kinase	Protein Kinase	AGC protein kinase group	AGC protein kinase PKC delta subfamily
PRMT1	2005.18	Q99873	CHEMBL5524	Protein-arginine N-methyltransferase 1	Other	Epigenetic regulator	Epigenetic Writer	Protein arginine methyltransferase
PRSS1	15.7882	P07477	CHEMBL209	Trypsin I	Enzyme	Protease	Serine protease	Serine protease S1A subfamily
PRSS3	25.6036	P35030	CHEMBL4551	Trypsin III	Enzyme	Protease	Serine protease	Serine protease S1A subfamily
PSIP1	0.485284	O75475	CHEMBL3988590	PC4 and SFRS1-interacting protein	Other	Unclassified protein
PTGER3	0.382616	P43115	CHEMBL3710	Prostanoid EP3 receptor	GPCR	Family A GPCR	Small molecule receptor (family A GPCR)	Prostanoid receptor
PTGIS	1.16128	Q16647	CHEMBL4428	Prostaglandin I2 synthase	Enzyme	Isomerase
PTGS1	4.07016	P23219	CHEMBL221	Cyclooxygenase-1	Enzyme	Oxidoreductase
PTGS2	4.35438	P35354	CHEMBL230	Cyclooxygenase-2	Enzyme	Oxidoreductase
PTH1R	12.7491	Q03431	CHEMBL1793	Parathyroid hormone receptor	GPCR	Family B GPCR	Peptide receptor (family B GPCR)	Parathyroid hormone receptor
PTK2	0.159066	Q05397	CHEMBL2695	Focal adhesion kinase 1	Kinase	Protein Kinase	TK protein kinase group
PTPN1	548.287	P18031	CHEMBL335	Protein-tyrosine phosphatase 1B	Enzyme	Phosphatase	Protein Phosphatase
PTPN11	83.2657	Q06124	CHEMBL3864	Protein-tyrosine phosphatase 2C	Enzyme	Phosphatase	Protein Phosphatase
PTPN2	83.3449	P17706	CHEMBL3807	T-cell protein-tyrosine phosphatase	Enzyme	Phosphatase	Protein Phosphatase
PTPN6	83.3449	P29350	CHEMBL3166	Protein-tyrosine phosphatase 1C	Enzyme	Phosphatase	Protein Phosphatase
PTPN7	83.6162	P35236	CHEMBL2219	Protein-tyrosine phosphatase LC-PTP	Enzyme	Phosphatase	Protein Phosphatase
PTPRCAP	0.0352046	Q14761	CHEMBL4806	Protein tyrosine phosphatase receptor type C-associated protein	Enzyme	Other Enzyme
PTPRE	0.0791175	P23469	CHEMBL4850	Receptor-type tyrosine-protein phosphatase epsilon	Enzyme	Phosphatase	Protein Phosphatase	Receptor tyrosine-protein phosphatase
PTPRF	0.204143	P10586	CHEMBL3521	Receptor-type tyrosine-protein phosphatase F (LAR)	Enzyme	Phosphatase	Protein Phosphatase	Receptor tyrosine-protein phosphatase
PYGL	1.1799	P06737	CHEMBL2568	Liver glycogen phosphorylase	Enzyme	Transferase
PYGM	1.76382	P11217	CHEMBL3526	Muscle glycogen phosphorylase	Enzyme	Transferase
RAC1	0.37532	P63000	CHEMBL6094	Ras-related C3 botulinum toxin substrate 1	Other	Unclassified protein
RAD52	16956.7	P43351	CHEMBL2362978	DNA repair protein RAD52 homolog	Other	Unclassified protein
RAD54L	16956.7	Q92698	CHEMBL2146297	DNA repair and recombination protein RAD54-like	Enzyme	Other Enzyme
RB1	1.68129	P06400	CHEMBL5288	Retinoblastoma-associated protein	Other	Unclassified protein
REN	2.71983	P00797	CHEMBL286	Renin	Enzyme	Protease	Aspartic protease	Aspartic protease A1A subfamily
RGS19	83.1407	P49795	CHEMBL3707468	Regulator of G-protein signaling 19	Enzyme	Other Enzyme
RHO	1.01035	P08100		Rhodopsin	Other	Unclassified protein
ROCK2	0.321599	O75116	CHEMBL2973	Rho-associated protein kinase 2	Kinase	Protein Kinase	AGC protein kinase group	AGC protein kinase ROCK subfamily
RORC	0.0791175	P51449	CHEMBL1741186	Nuclear receptor ROR-gamma	Transcription factor	Nuclear receptor	Nuclear hormone receptor subfamily 1	Nuclear hormone receptor subfamily 1 group F member 3
RRM1	1.02083	P23921	CHEMBL1830	Ribonucleoside-diphosphate reductase M1 chain	Enzyme	Oxidoreductase
RXRA	84.3981	P19793	CHEMBL2061	Retinoid X receptor alpha	Transcription factor	Nuclear receptor	Nuclear hormone receptor subfamily 2	Nuclear hormone receptor subfamily 2 group B member 1
RXRB	0.716981	P28702	CHEMBL1870	Retinoid X receptor beta	Transcription factor	Nuclear receptor	Nuclear hormone receptor subfamily 2	Nuclear hormone receptor subfamily 2 group B member 2
RXRG	0.349439	P48443	CHEMBL2004	Retinoid X receptor gamma	Transcription factor	Nuclear receptor	Nuclear hormone receptor subfamily 2	Nuclear hormone receptor subfamily 2 group B member 3
SAE1	2005.18	Q9UBE0	CHEMBL1615388	SUMO-activating enzyme subunit 1	Other	Unclassified protein
SARS	0.629091	P49591		Serine--tRNA ligase, cytoplasmic	Enzyme	Ligase
SCN10A	0.261905	Q9Y5Y9	CHEMBL5451	Sodium channel protein type X alpha subunit	Ion channel	VGIC	Voltage-gated sodium channel
SCN5A	76.0138	Q14524	CHEMBL1980	Sodium channel protein type V alpha subunit	Ion channel	VGIC	Voltage-gated sodium channel
SDHA	1.99042	P31040	CHEMBL5758	Succinate dehydrogenase [ubiquinone] flavoprotein subunit, mitochondrial	Enzyme	Oxidoreductase
SDS	0.629091	P20132		L-serine dehydratase/L-threonine deaminase	Enzyme	Lyase
SELE	28.4362	P16581	CHEMBL3890	Selectin E	Other	Other
SELL	0.441608	P14151	CHEMBL3161	Leukocyte adhesion molecule-1	Other	Other
SELP	0.816929	P16109	CHEMBL5378	P-selectin	Other	Other
SENP6	2005.18	Q9GZR1	CHEMBL1741215	Sentrin-specific protease 6	Enzyme	Other Enzyme
SENP8	13817.4	Q96LD8	CHEMBL1741207	Sentrin-specific protease 8	Enzyme	Other Enzyme
SERPINE1	0.441608	P05121	CHEMBL3475	Plasminogen activator inhibitor-1	Other	Other
SH2D1B	409.901	O14796		SH2 domain-containing protein 1B	Other	Unclassified protein
SHBG	0.132693	P04278	CHEMBL3305	Testis-specific androgen-binding protein	Other	Other
SHMT1	1.02083	P34896	CHEMBL1772927	Serine hydroxymethyltransferase, cytosolic	Enzyme	Transferase
SHMT2	1.81342	P34897		Serine hydroxymethyltransferase, mitochondrial	Enzyme	Transferase
SI	0.261305	P14410	CHEMBL2748	Sucrase-isomaltase	Enzyme	Hydrolase
SIGMAR1	13817.4	Q99720	CHEMBL287	Sigma opioid receptor	Other	Membrane receptor	Other membrane receptor
SIRT1	33.8742	Q96EB6	CHEMBL4506	NAD-dependent deacetylase sirtuin 1	Other	Epigenetic regulator	Epigenetic Eraser	HDAC class III
SLC1A1	0.520836	P43005	CHEMBL2721	Excitatory amino acid transporter 3	Transporter	Electrochemical transporter	SLC superfamily of solute carriers
SLC1A2	0.520836	P43004	CHEMBL4973	Excitatory amino acid transporter 2	Transporter	Electrochemical transporter	SLC superfamily of solute carriers
SLC1A3	0.520836	P43003	CHEMBL3085	Excitatory amino acid transporter 1	Transporter	Electrochemical transporter	SLC superfamily of solute carriers
SLC22A8	1.16128	Q8TCC7	CHEMBL1641348	Solute carrier family 22 member 8	Transporter	Electrochemical transporter	SLC superfamily of solute carriers
SLC25A10	1.4373	Q9UBX3		Mitochondrial dicarboxylate carrier	Other	Unclassified protein
SLC25A12	0.553123	O75746		Calcium-binding mitochondrial carrier protein Aralar1	Other	Unclassified protein
SLC25A13	1.57395	Q9UJS0		Calcium-binding mitochondrial carrier protein Aralar2	Other	Unclassified protein
SLC28A1	0.0150114	O00337	CHEMBL5551	Sodium/nucleoside cotransporter 1	Transporter	Electrochemical transporter	SLC superfamily of solute carriers	SLC28 Na+-coupled nucleoside transport family
SLC28A2	0.0150114	O43868	CHEMBL5780	Sodium/nucleoside cotransporter 2	Transporter	Electrochemical transporter	SLC superfamily of solute carriers	SLC28 Na+-coupled nucleoside transport family
SLC28A3	0.0150114	Q9HAS3	CHEMBL5707	Solute carrier family 28 member 3	Transporter	Electrochemical transporter	SLC superfamily of solute carriers	SLC28 Na+-coupled nucleoside transport family
SLC29A1	0.0150114	Q99808	CHEMBL1997	Equilibrative nucleoside transporter 1	Transporter	Electrochemical transporter	SLC superfamily of solute carriers	SLC29 Facilitative nucleoside transporter family
SLC36A1	2.44251	Q7Z2H8	CHEMBL1914279	Proton-coupled amino acid transporter 1	Transporter	Electrochemical transporter	SLC superfamily of solute carriers
SLC47A1	0.505455	Q96FL8	CHEMBL1743126	Multidrug and toxin extrusion protein 1	Transporter	Electrochemical transporter	SLC superfamily of solute carriers
SLC5A1	0.0955646	P13866	CHEMBL4979	Sodium/glucose cotransporter 1	Transporter	Electrochemical transporter	SLC superfamily of solute carriers
SLC5A2	0.0955646	P31639	CHEMBL3884	Sodium/glucose cotransporter 2	Transporter	Electrochemical transporter	SLC superfamily of solute carriers
SLC6A1	0.670194	P30531	CHEMBL1903	GABA transporter 1	Transporter	Electrochemical transporter	SLC superfamily of solute carriers
SLC6A11	0.670194	P48066	CHEMBL5208	GABA transporter 3	Transporter	Electrochemical transporter	SLC superfamily of solute carriers
SLC6A12	0.670194	P48065	CHEMBL3715	Betaine transporter	Transporter	Electrochemical transporter	SLC superfamily of solute carriers
SLC6A2	0.830515	P23975	CHEMBL222	Norepinephrine transporter	Transporter	Electrochemical transporter	SLC superfamily of solute carriers
SLC6A3	1.8742	Q01959	CHEMBL238	Dopamine transporter	Transporter	Electrochemical transporter	SLC superfamily of solute carriers
SLC6A4	0.710357	P31645	CHEMBL228	Serotonin transporter	Transporter	Electrochemical transporter	SLC superfamily of solute carriers
SLC6A9	1.02083	P48067	CHEMBL2337	Glycine transporter 1	Transporter	Electrochemical transporter	SLC superfamily of solute carriers
SLC7A1	0.493327	P30825		High affinity cationic amino acid transporter 1	Other	Unclassified protein
SLC7A4	0.493327	O43246		Cationic amino acid transporter 4	Other	Unclassified protein
SLCO1A2	169.079	P46721	CHEMBL1743123	Solute carrier organic anion transporter family member 1A2	Transporter	Electrochemical transporter	SLC superfamily of solute carriers
SLCO1B1	1579.82	Q9Y6L6	CHEMBL1697668	Solute carrier organic anion transporter family member 1B1	Transporter	Electrochemical transporter	SLC superfamily of solute carriers
SLCO1B3	1579.82	Q9NPD5	CHEMBL1743121	Solute carrier organic anion transporter family member 1B3	Transporter	Electrochemical transporter	SLC superfamily of solute carriers
SLCO2A1	0.330532	Q92959	CHEMBL2073703	Solute carrier organic anion transporter family member 2A1	Transporter	Electrochemical transporter	SLC superfamily of solute carriers
SMAD2	83.1407	Q15796	CHEMBL2396512	Mothers against decapentaplegic homolog 2	Other	Unclassified protein
SMAD3	95.8898	P84022	CHEMBL1293258	Mothers against decapentaplegic homolog 3	Other	Unclassified protein
SMARCA2	27.5288	P51531	CHEMBL2362979	Probable global transcription activator SNF2L2	Other	Epigenetic regulator	Epigenetic Reader
SMPD1	16.1862	P17405	CHEMBL2760	Sphingomyelin phosphodiesterase	Enzyme	Hydrolase
SOAT1	0.376515	P35610	CHEMBL2782	Acyl coenzyme A:cholesterol acyltransferase 1	Enzyme	Transferase
SOD1	1.97582	P00441	CHEMBL2354	Superoxide dismutase	Enzyme	Oxidoreductase
SORD	1.15823	Q00796	CHEMBL2275	Sorbitol dehydrogenase	Enzyme	Oxidoreductase
SRC	2.26049	P12931	CHEMBL267	Tyrosine-protein kinase SRC	Kinase	Protein Kinase	TK protein kinase group
SRR	1.91232	Q9GZT4	CHEMBL4460	Serine racemase	Enzyme	Isomerase
ST3GAL1	0.441608	Q11201	CHEMBL3596074	CMP-N-acetylneuraminate-beta-galactosamide-alpha-2,3-sialyltransferase 1	Enzyme	Transferase
STK33	0.387075	Q9BYT3	CHEMBL6005	Serine/threonine-protein kinase 33	Kinase	Protein Kinase	CAMK protein kinase group
SUCLA2	0.416466	Q9P2R7	CHEMBL4105973	Succinate--CoA ligase [ADP-forming] subunit beta, mitochondrial	Enzyme	Ligase
SULT1E1	0.159066	P49888	CHEMBL2346	Estrogen sulfotransferase	Enzyme	Transferase
SYK	0.785648	P43405	CHEMBL2599	Tyrosine-protein kinase SYK	Kinase	Protein Kinase	TK protein kinase group
TARDBP	2584.2	Q13148	CHEMBL2362981	TAR DNA-binding protein 43	Other	Unclassified protein
TARS	0.555014	P26639	CHEMBL3391	Threonyl-tRNA synthetase	Enzyme	Ligase
TAT	1.16128	P17735	CHEMBL3043	Tyrosine aminotransferase	Enzyme	Transferase
TBXA2R	0.0738773	P21731	CHEMBL2069	Thromboxane A2 receptor	GPCR	Family A GPCR	Small molecule receptor (family A GPCR)	Prostanoid receptor
TDP1	16497.5	Q9NUW8	CHEMBL1075138	Tyrosyl-DNA phosphodiesterase 1	Enzyme	Other Enzyme
TDP2	2005.18	O95551	CHEMBL2169736	Tyrosyl-DNA phosphodiesterase 2	Enzyme	Other Enzyme
TERT	13817.4	O14746	CHEMBL2916	Telomerase reverse transcriptase	Enzyme	Transferase
TH	0.0352046	P07101	CHEMBL1969	Tyrosine 3-hydroxylase	Enzyme	Oxidoreductase
THBD	0.159066	P07204		Thrombomodulin	Other	Unclassified protein
TKT	0.0491669	P29401	CHEMBL4983	Transketolase	Enzyme	Transferase
TLR2	0.22481	O60603	CHEMBL4163	Toll-like receptor 2	Other	Membrane receptor	Toll-like and Il-1 receptors
TNF	0.214461	P01375	CHEMBL1825	TNF-alpha	Other	Other
TNKS	0.626582	O95271	CHEMBL6164	Tankyrase-1	Enzyme	Transferase
TNKS2	0.626582	Q9H2K2	CHEMBL6154	Tankyrase-2	Enzyme	Transferase
TNNC1	2017.93	P63316	CHEMBL2095202	Troponin, cardiac muscle	Other	Other
TNNI3	2017.93	P19429	CHEMBL2095202	Troponin, cardiac muscle	Other	Other
TNNT2	2017.93	P45379	CHEMBL2095202	Troponin, cardiac muscle	Other	Other
TOP1	704.852	P11387	CHEMBL1781	DNA topoisomerase I	Enzyme	Isomerase
TOP2A	72.0602	P11388	CHEMBL1806	DNA topoisomerase II alpha	Enzyme	Isomerase
TP53	13900.8	P04637	CHEMBL4096	Cellular tumor antigen p53	Transcription factor	Other
TPI1	6.54807	P60174	CHEMBL4880	Triosephosphate isomerase	Enzyme	Isomerase
TPMT	1.08549	P51580	CHEMBL2500	Thiopurine S-methyltransferase	Enzyme	Transferase
TPO	1.16128	P07202	CHEMBL1839	Thyroid peroxidase	Enzyme	Oxidoreductase
TRHR	83.1407	P34981	CHEMBL1810	Thyrotropin-releasing hormone receptor	GPCR	Family A GPCR	Peptide receptor (family A GPCR)	Neuropeptide receptor
TRPA1	1.00748	O75762	CHEMBL6007	Transient receptor potential cation channel subfamily A member 1	Ion channel	VGIC	Transient receptor potential channel
TRPV1	0.262107	Q8NER1	CHEMBL4794	Vanilloid receptor	Ion channel	VGIC	Transient receptor potential channel
TRPV3	0.189503	Q8NET8	CHEMBL5522	Transient receptor potential cation channel subfamily V member 3	Ion channel	VGIC	Transient receptor potential channel
TSG101	2005.18	Q99816	CHEMBL6157	Tumor susceptibility gene 101 protein	Other	Unclassified protein
TSHR	83.1407	P16473	CHEMBL1963	Thyroid stimulating hormone receptor	GPCR	Family A GPCR	Peptide receptor (family A GPCR)	Glycohormone receptor
TTL	0.24879	Q8NG68	CHEMBL5549	Tubulin--tyrosine ligase	Enzyme	Ligase
TTR	1.0019	P02766	CHEMBL3194	Transthyretin	Other	Other
TXNRD1	1.4373	Q16881	CHEMBL1927	Thioredoxin reductase 1	Enzyme	Oxidoreductase
TXNRD3	0.097519	Q86VQ6	CHEMBL2096978	Thioredoxin reductase	Enzyme	Oxidoreductase
TYR	2.19024	P14679	CHEMBL1973	Tyrosinase	Enzyme	Oxidoreductase
UBA2	2005.18	Q9UBT2	CHEMBL2095174	SUMO-activating enzyme	Enzyme	Other Enzyme
UBE2I	2005.18	P63279	CHEMBL1741191	SUMO-conjugating enzyme UBC9	Enzyme	Other Enzyme
UBE2N	169.079	P61088	CHEMBL6089	Ubiquitin-conjugating enzyme E2 N	Enzyme	Transferase
UBLCP1	1.16128	Q8WVY7	CHEMBL3317333	Ubiquitin-like domain-containing CTD phosphatase 1	Enzyme	Phosphatase
UGT1A1	0.497789	P22309	CHEMBL1287617	UDP-glucuronosyltransferase 1-1	Enzyme	Transferase
UGT1A4	0.236484	P22310	CHEMBL3619	UDP-glucuronosyltransferase 1A4	Enzyme	Transferase
UGT1A6	0.236484	P19224	CHEMBL1743316	UDP-glucuronosyltransferase 1-6	Enzyme	Transferase
UGT2B10	0.236484	P36537	CHEMBL6160	UDP-glucuronosyltransferase 2B10	Enzyme	Transferase
UHRF1	13817.4	Q96T88	CHEMBL2424510	E3 ubiquitin-protein ligase UHRF1	Other	Epigenetic regulator	Epigenetic Reader	Reader	Methyl-lysine/arginine binding protein	Tudor domain
USP1	2005.18	O94782	CHEMBL1795087	Ubiquitin carboxyl-terminal hydrolase 1	Enzyme	Hydrolase
VCAM1	27.7761	P19320	CHEMBL3735	Vascular cell adhesion protein 1	Other	Other
VDR	83.1407	P11473	CHEMBL1977	Vitamin D receptor	Transcription factor	Nuclear receptor	Nuclear hormone receptor subfamily 1	Nuclear hormone receptor subfamily 1 group I member 1
VEGFA	0.157485	P15692	CHEMBL1783	Vascular endothelial growth factor A	Other	Other
XBP1	0.182564	P17861	CHEMBL1741176	X-box-binding protein 1	Other	Unclassified protein
XDH	4.87157	P47989	CHEMBL1929	Xanthine dehydrogenase	Enzyme	Oxidoreductase
XIAP	0.227627	P98170	CHEMBL4198	Inhibitor of apoptosis protein 3	Other	Other
XPO1	0.236484	O14980	CHEMBL5661	Exportin-1	Other	Unclassified protein
YARS2	1.02083	Q9Y2Z4		Tyrosine--tRNA ligase, mitochondrial	Enzyme	Ligase
