# Supplementary material for: A Network Pharmacology Study of the Multi-Targeting Profile of an Antiarrhythmic Chinese Medicine Xin Su Ning
Source: Front Pharmacol. 2019 Sep 25;10:1138. doi: 10.3389/fphar.2019.01138 (PMC6774044; doi:10.3389/fphar.2019.01138)
Supplement: Table S4 — PHHD-arrhythmia target spectrum. [file Table_4.xlsx]

## Sheet: default
Gene_Symbol	TCM_Symptom
ANG	Kou Gan
ANXA11	Kou Gan
ATXN2	Kou Gan
B2M	Kou Gan
CAV1	Kou Gan
CHCHD10	Kou Gan
CHMP2B	Kou Gan
CHRM3	Kou Gan
DAO	Kou Gan
DCTN1	Kou Gan
EDARADD	Kou Gan
ERBB4	Kou Gan
FERMT1	Kou Gan
FGF10	Kou Gan
FGFR2	Kou Gan
FGFR3	Kou Gan
FIG4	Kou Gan
FUS	Kou Gan
GLE1	Kou Gan
HLA-DRB1	Kou Gan
HNRNPA1	Kou Gan
IRF5	Kou Gan
LBR	Kou Gan
MATR3	Kou Gan
NEFH	Kou Gan
NEK1	Kou Gan
NOD2	Kou Gan
OPTN	Kou Gan
PFN1	Kou Gan
PON1	Kou Gan
PRPH	Kou Gan
SCN9A	Kou Gan
SOD1	Kou Gan
SQSTM1	Kou Gan
TAF15	Kou Gan
TARDBP	Kou Gan
TBK1	Kou Gan
TP63	Kou Gan
TREM2	Kou Gan
UBQLN2	Kou Gan
VAPB	Kou Gan
VCP	Kou Gan
ELP1	Kou Ku
KIF1A	Kou Ku
RETREG1	Kou Ku
SCN9A	Kou Ku
SLC39A4	Kou Ku
WNK1	Kou Ku
A2ML1	Mai Jie Dai
ABCA12	Mai Jie Dai
ABCC6	Mai Jie Dai
ABCC8	Mai Jie Dai
ABCC9	Mai Jie Dai
ABCG5	Mai Jie Dai
ABCG8	Mai Jie Dai
ACAD9	Mai Jie Dai
ACADVL	Mai Jie Dai
ACTC1	Mai Jie Dai
ACTN2	Mai Jie Dai
AGPAT2	Mai Jie Dai
AKAP10	Mai Jie Dai
AKT1	Mai Jie Dai
ALG10	Mai Jie Dai
ANK2	Mai Jie Dai
APOB	Mai Jie Dai
ATP6	Mai Jie Dai
ATRX	Mai Jie Dai
BANF1	Mai Jie Dai
BMP2	Mai Jie Dai
BRAF	Mai Jie Dai
BRAT1	Mai Jie Dai
BSCL2	Mai Jie Dai
BTNL2	Mai Jie Dai
BVES	Mai Jie Dai
CACNA1B	Mai Jie Dai
CACNA1C	Mai Jie Dai
CACNA1D	Mai Jie Dai
CACNA1S	Mai Jie Dai
CACNB2	Mai Jie Dai
CALM1	Mai Jie Dai
CALM2	Mai Jie Dai
CASQ2	Mai Jie Dai
CASR	Mai Jie Dai
CAV1	Mai Jie Dai
CAV3	Mai Jie Dai
CAVIN1	Mai Jie Dai
CDH23	Mai Jie Dai
CLCF1	Mai Jie Dai
CLIC2	Mai Jie Dai
CNBP	Mai Jie Dai
COL4A1	Mai Jie Dai
COQ4	Mai Jie Dai
COQ9	Mai Jie Dai
COX1	Mai Jie Dai
COX2	Mai Jie Dai
COX3	Mai Jie Dai
COX7B	Mai Jie Dai
CPOX	Mai Jie Dai
CPT1A	Mai Jie Dai
CPT2	Mai Jie Dai
CREBBP	Mai Jie Dai
CRLF1	Mai Jie Dai
CSRP3	Mai Jie Dai
CTLA4	Mai Jie Dai
CTNNA3	Mai Jie Dai
CYTB	Mai Jie Dai
DES	Mai Jie Dai
DMD	Mai Jie Dai
DMPK	Mai Jie Dai
DNAJC19	Mai Jie Dai
DPP6	Mai Jie Dai
DSC2	Mai Jie Dai
DSG2	Mai Jie Dai
DSP	Mai Jie Dai
DST	Mai Jie Dai
DTNA	Mai Jie Dai
ECE1	Mai Jie Dai
EFEMP2	Mai Jie Dai
ELN	Mai Jie Dai
ELP1	Mai Jie Dai
EMD	Mai Jie Dai
ENPP1	Mai Jie Dai
EP300	Mai Jie Dai
ERCC6	Mai Jie Dai
ERCC8	Mai Jie Dai
EYA4	Mai Jie Dai
FBLN5	Mai Jie Dai
FBP1	Mai Jie Dai
FBXL4	Mai Jie Dai
FGFR3	Mai Jie Dai
FH	Mai Jie Dai
FHL1	Mai Jie Dai
FLAD1	Mai Jie Dai
FLNC	Mai Jie Dai
FMO3	Mai Jie Dai
FOXC2	Mai Jie Dai
GAA	Mai Jie Dai
GATA1	Mai Jie Dai
GATA5	Mai Jie Dai
GATAD1	Mai Jie Dai
GBA	Mai Jie Dai
GDAP1	Mai Jie Dai
GDNF	Mai Jie Dai
GJA1	Mai Jie Dai
GJA5	Mai Jie Dai
GLA	Mai Jie Dai
GLUL	Mai Jie Dai
GNA11	Mai Jie Dai
GNAI2	Mai Jie Dai
GNAQ	Mai Jie Dai
GNB5	Mai Jie Dai
GPC3	Mai Jie Dai
GPC4	Mai Jie Dai
GPD1L	Mai Jie Dai
GPX4	Mai Jie Dai
GTPBP3	Mai Jie Dai
GYG1	Mai Jie Dai
HADHA	Mai Jie Dai
HADHB	Mai Jie Dai
HBB	Mai Jie Dai
HCCS	Mai Jie Dai
HCN4	Mai Jie Dai
HFE	Mai Jie Dai
HJV	Mai Jie Dai
HLA-B	Mai Jie Dai
HLA-DRB1	Mai Jie Dai
HMBS	Mai Jie Dai
HNF1A	Mai Jie Dai
HNF4A	Mai Jie Dai
HRAS	Mai Jie Dai
HSPG2	Mai Jie Dai
HTRA2	Mai Jie Dai
IFNG	Mai Jie Dai
IKZF1	Mai Jie Dai
ISCU	Mai Jie Dai
JPH2	Mai Jie Dai
JUP	Mai Jie Dai
KAT6B	Mai Jie Dai
KCNA5	Mai Jie Dai
KCND3	Mai Jie Dai
KCNE1	Mai Jie Dai
KCNE2	Mai Jie Dai
KCNE3	Mai Jie Dai
KCNH2	Mai Jie Dai
KCNJ11	Mai Jie Dai
KCNJ18	Mai Jie Dai
KCNJ2	Mai Jie Dai
KCNJ5	Mai Jie Dai
KCNK3	Mai Jie Dai
KCNQ1	Mai Jie Dai
KIF1B	Mai Jie Dai
KRAS	Mai Jie Dai
KYNU	Mai Jie Dai
LAMA2	Mai Jie Dai
LAMP2	Mai Jie Dai
LARS2	Mai Jie Dai
LDB3	Mai Jie Dai
LDLR	Mai Jie Dai
LDLRAP1	Mai Jie Dai
LIPT1	Mai Jie Dai
LMNA	Mai Jie Dai
LRP6	Mai Jie Dai
LZTR1	Mai Jie Dai
MAX	Mai Jie Dai
MDH2	Mai Jie Dai
MECP2	Mai Jie Dai
MEFV	Mai Jie Dai
MEN1	Mai Jie Dai
MFAP5	Mai Jie Dai
MGME1	Mai Jie Dai
MTFMT	Mai Jie Dai
MTO1	Mai Jie Dai
MYH6	Mai Jie Dai
MYH7	Mai Jie Dai
MYL2	Mai Jie Dai
MYL3	Mai Jie Dai
MYL4	Mai Jie Dai
MYLK2	Mai Jie Dai
MYOZ2	Mai Jie Dai
MYPN	Mai Jie Dai
NAA10	Mai Jie Dai
ND1	Mai Jie Dai
ND2	Mai Jie Dai
ND4	Mai Jie Dai
ND4L	Mai Jie Dai
ND5	Mai Jie Dai
ND6	Mai Jie Dai
NDUFB11	Mai Jie Dai
NDUFS2	Mai Jie Dai
NEXN	Mai Jie Dai
NKX2-5	Mai Jie Dai
NPPA	Mai Jie Dai
NRAS	Mai Jie Dai
NUP155	Mai Jie Dai
PAX8	Mai Jie Dai
PCCA	Mai Jie Dai
PCCB	Mai Jie Dai
PCSK9	Mai Jie Dai
PEX1	Mai Jie Dai
PEX10	Mai Jie Dai
PEX11B	Mai Jie Dai
PEX12	Mai Jie Dai
PEX13	Mai Jie Dai
PEX14	Mai Jie Dai
PEX16	Mai Jie Dai
PEX19	Mai Jie Dai
PEX2	Mai Jie Dai
PEX26	Mai Jie Dai
PEX3	Mai Jie Dai
PEX5	Mai Jie Dai
PEX6	Mai Jie Dai
PEX7	Mai Jie Dai
PGM1	Mai Jie Dai
PHOX2B	Mai Jie Dai
PHYH	Mai Jie Dai
PIK3CA	Mai Jie Dai
PKP2	Mai Jie Dai
PLN	Mai Jie Dai
POLG	Mai Jie Dai
POLG2	Mai Jie Dai
PPA2	Mai Jie Dai
PPARG	Mai Jie Dai
PPOX	Mai Jie Dai
PRDM16	Mai Jie Dai
PRKAG2	Mai Jie Dai
PSMB8	Mai Jie Dai
PTEN	Mai Jie Dai
PTPN11	Mai Jie Dai
PTPN22	Mai Jie Dai
RAF1	Mai Jie Dai
RBM20	Mai Jie Dai
RET	Mai Jie Dai
RIT1	Mai Jie Dai
RPL11	Mai Jie Dai
RPL15	Mai Jie Dai
RPL18	Mai Jie Dai
RPL26	Mai Jie Dai
RPL27	Mai Jie Dai
RPL35	Mai Jie Dai
RPL35A	Mai Jie Dai
RPL5	Mai Jie Dai
RPS10	Mai Jie Dai
RPS17	Mai Jie Dai
RPS19	Mai Jie Dai
RPS24	Mai Jie Dai
RPS26	Mai Jie Dai
RPS27	Mai Jie Dai
RPS28	Mai Jie Dai
RPS29	Mai Jie Dai
RPS7	Mai Jie Dai
RRM2B	Mai Jie Dai
RYR1	Mai Jie Dai
RYR2	Mai Jie Dai
SALL4	Mai Jie Dai
SCN1B	Mai Jie Dai
SCN2B	Mai Jie Dai
SCN3B	Mai Jie Dai
SCN4A	Mai Jie Dai
SCN4B	Mai Jie Dai
SCN5A	Mai Jie Dai
SCN9A	Mai Jie Dai
SCNN1B	Mai Jie Dai
SCNN1G	Mai Jie Dai
SDHA	Mai Jie Dai
SDHAF2	Mai Jie Dai
SDHB	Mai Jie Dai
SDHC	Mai Jie Dai
SDHD	Mai Jie Dai
SGO1	Mai Jie Dai
SLC12A3	Mai Jie Dai
SLC19A2	Mai Jie Dai
SLC25A20	Mai Jie Dai
SLC25A4	Mai Jie Dai
SLC2A10	Mai Jie Dai
SLC40A1	Mai Jie Dai
SMAD3	Mai Jie Dai
SNTA1	Mai Jie Dai
SOS1	Mai Jie Dai
SOS2	Mai Jie Dai
SOX10	Mai Jie Dai
SPECC1L	Mai Jie Dai
SRY	Mai Jie Dai
SYNE1	Mai Jie Dai
SYNE2	Mai Jie Dai
TAB2	Mai Jie Dai
TANGO2	Mai Jie Dai
TAZ	Mai Jie Dai
TBX3	Mai Jie Dai
TBX5	Mai Jie Dai
TCAP	Mai Jie Dai
TECRL	Mai Jie Dai
TGFB3	Mai Jie Dai
TGFBR1	Mai Jie Dai
TGFBR2	Mai Jie Dai
TLL1	Mai Jie Dai
TMEM127	Mai Jie Dai
TMEM43	Mai Jie Dai
TMEM70	Mai Jie Dai
TNNC1	Mai Jie Dai
TNNI3	Mai Jie Dai
TNNI3K	Mai Jie Dai
TNNT2	Mai Jie Dai
TNXB	Mai Jie Dai
TP53	Mai Jie Dai
TPM1	Mai Jie Dai
TPM2	Mai Jie Dai
TPM3	Mai Jie Dai
TRDN	Mai Jie Dai
TRPM4	Mai Jie Dai
TSC1	Mai Jie Dai
TSC2	Mai Jie Dai
TSHR	Mai Jie Dai
TSPYL1	Mai Jie Dai
TSR2	Mai Jie Dai
TTN	Mai Jie Dai
TTPA	Mai Jie Dai
TTR	Mai Jie Dai
TWNK	Mai Jie Dai
UCP2	Mai Jie Dai
USP18	Mai Jie Dai
VHL	Mai Jie Dai
WAS	Mai Jie Dai
WIPF1	Mai Jie Dai
XK	Mai Jie Dai
ZMPSTE24	Mai Jie Dai
CPOX	Shi Mian
CRY1	Shi Mian
DCTN1	Shi Mian
ELN	Shi Mian
HCRT	Shi Mian
HLA-DQB1	Shi Mian
HLA-DRB1	Shi Mian
HMBS	Shi Mian
MEN1	Shi Mian
PRNP	Shi Mian
SIN3A	Shi Mian
ZNF365	Shi Mian
AGPAT2	Xin Ji
ATRX	Xin Ji
BSCL2	Xin Ji
CACNA1S	Xin Ji
CAV1	Xin Ji
CAV3	Xin Ji
CAVIN1	Xin Ji
CDH23	Xin Ji
CNBP	Xin Ji
DSC2	Xin Ji
DSG2	Xin Ji
FH	Xin Ji
GYG1	Xin Ji
ISCU	Xin Ji
JPH2	Xin Ji
JUP	Xin Ji
KCNA5	Xin Ji
KCND3	Xin Ji
KCNE2	Xin Ji
KCNH2	Xin Ji
KCNJ18	Xin Ji
KCNJ2	Xin Ji
KCNQ1	Xin Ji
KIF1B	Xin Ji
MAX	Xin Ji
MDH2	Xin Ji
MEN1	Xin Ji
MYL2	Xin Ji
MYL3	Xin Ji
MYL4	Xin Ji
NPPA	Xin Ji
PKP2	Xin Ji
POLG	Xin Ji
POLG2	Xin Ji
PPARG	Xin Ji
PRKAG2	Xin Ji
RET	Xin Ji
RRM2B	Xin Ji
SCN5A	Xin Ji
SCN9A	Xin Ji
SDHA	Xin Ji
SDHAF2	Xin Ji
SDHB	Xin Ji
SDHC	Xin Ji
SDHD	Xin Ji
SLC12A3	Xin Ji
SLC25A4	Xin Ji
TMEM127	Xin Ji
TMEM43	Xin Ji
TP53	Xin Ji
TWNK	Xin Ji
VHL	Xin Ji
ABCA3	Xiong Men
ADAMTS13	Xiong Men
ADCY6	Xiong Men
AGRN	Xiong Men
AIFM1	Xiong Men
ALDH7A1	Xiong Men
APOPT1	Xiong Men
BMPER	Xiong Men
CDC45	Xiong Men
CDC6	Xiong Men
CDT1	Xiong Men
CHAT	Xiong Men
CHRNE	Xiong Men
CNTNAP1	Xiong Men
COA7	Xiong Men
COL13A1	Xiong Men
COL2A1	Xiong Men
COLQ	Xiong Men
COPA	Xiong Men
COQ7	Xiong Men
COX10	Xiong Men
COX14	Xiong Men
COX20	Xiong Men
COX6B1	Xiong Men
COX7B	Xiong Men
COX8A	Xiong Men
CPT2	Xiong Men
CREBBP	Xiong Men
DMPK	Xiong Men
DNAAF3	Xiong Men
DPM1	Xiong Men
EDA	Xiong Men
EDN1	Xiong Men
EFEMP2	Xiong Men
EFTUD2	Xiong Men
EP300	Xiong Men
EPHB4	Xiong Men
ERF	Xiong Men
ETFA	Xiong Men
ETFB	Xiong Men
ETFDH	Xiong Men
FAM20C	Xiong Men
FASTKD2	Xiong Men
FBLN5	Xiong Men
FGFR1	Xiong Men
FGFR2	Xiong Men
FOXF1	Xiong Men
GATA6	Xiong Men
GBA	Xiong Men
GMNN	Xiong Men
GNAI3	Xiong Men
HCCS	Xiong Men
HLCS	Xiong Men
IFT52	Xiong Men
IFT81	Xiong Men
IL1RN	Xiong Men
ITGA3	Xiong Men
KAT6A	Xiong Men
KCNA1	Xiong Men
LAMB2	Xiong Men
LGI4	Xiong Men
LIFR	Xiong Men
LYRM4	Xiong Men
MEGF10	Xiong Men
MMAA	Xiong Men
MMAB	Xiong Men
MPC1	Xiong Men
MYO9A	Xiong Men
NAGS	Xiong Men
NDUFB11	Xiong Men
NGLY1	Xiong Men
NKX2-1	Xiong Men
ORC1	Xiong Men
ORC4	Xiong Men
ORC6	Xiong Men
OTX2	Xiong Men
PET100	Xiong Men
PLCB4	Xiong Men
POMT1	Xiong Men
PRRX1	Xiong Men
RPS26	Xiong Men
RPS28	Xiong Men
SCO1	Xiong Men
SCO2	Xiong Men
SDCCAG8	Xiong Men
SERPING1	Xiong Men
SFTPB	Xiong Men
SFTPC	Xiong Men
SIK1	Xiong Men
SLC18A3	Xiong Men
SLC25A1	Xiong Men
SLC25A3	Xiong Men
SLC2A10	Xiong Men
SLC35A1	Xiong Men
SLC52A3	Xiong Men
SLC5A7	Xiong Men
SNAP25	Xiong Men
SOX9	Xiong Men
STAT5B	Xiong Men
STT3B	Xiong Men
SYT2	Xiong Men
TACO1	Xiong Men
TK2	Xiong Men
TUBB4A	Xiong Men
UBE3B	Xiong Men
USP9X	Xiong Men
VAMP1	Xiong Men
VPS33A	Xiong Men
ADA2	Xuan Yun
AIP	Xuan Yun
ATP1A2	Xuan Yun
B2M	Xuan Yun
BRAF	Xuan Yun
C4A	Xuan Yun
CACNA1A	Xuan Yun
CACNA1G	Xuan Yun
CACNB4	Xuan Yun
CALM1	Xuan Yun
CALM2	Xuan Yun
CASQ2	Xuan Yun
CCND1	Xuan Yun
CDH23	Xuan Yun
CNNM2	Xuan Yun
COCH	Xuan Yun
COL3A1	Xuan Yun
COL5A1	Xuan Yun
CTNNB1	Xuan Yun
EGF	Xuan Yun
EPOR	Xuan Yun
FAS	Xuan Yun
FH	Xuan Yun
FOXI1	Xuan Yun
GATA2	Xuan Yun
GCDH	Xuan Yun
GLA	Xuan Yun
GYG1	Xuan Yun
HFE	Xuan Yun
HLA-B	Xuan Yun
IL10	Xuan Yun
IL23R	Xuan Yun
JAK2	Xuan Yun
JUP	Xuan Yun
KCNA1	Xuan Yun
KCNJ10	Xuan Yun
KIF1B	Xuan Yun
MAX	Xuan Yun
MDH2	Xuan Yun
MEFV	Xuan Yun
MEN1	Xuan Yun
MPL	Xuan Yun
MVK	Xuan Yun
MYD88	Xuan Yun
MYL2	Xuan Yun
MYO7A	Xuan Yun
NAGA	Xuan Yun
NF2	Xuan Yun
NOP56	Xuan Yun
PDGFB	Xuan Yun
PTPN22	Xuan Yun
RET	Xuan Yun
RYR2	Xuan Yun
SDHA	Xuan Yun
SDHAF2	Xuan Yun
SDHB	Xuan Yun
SDHC	Xuan Yun
SDHD	Xuan Yun
SH2B3	Xuan Yun
SLC12A3	Xuan Yun
SLC1A3	Xuan Yun
SLC26A4	Xuan Yun
STAT4	Xuan Yun
TECRL	Xuan Yun
TET2	Xuan Yun
THPO	Xuan Yun
TMEM127	Xuan Yun
TNFRSF1A	Xuan Yun
TNXB	Xuan Yun
TPK1	Xuan Yun
TRDN	Xuan Yun
VHL	Xuan Yun
FH	Yi Jing
KCTD17	Yi Jing
KIF1B	Yi Jing
MAX	Yi Jing
MDH2	Yi Jing
RET	Yi Jing
SDHA	Yi Jing
SDHAF2	Yi Jing
SDHB	Yi Jing
SDHC	Yi Jing
SDHD	Yi Jing
SGCE	Yi Jing
SPART	Yi Jing
TMEM127	Yi Jing
TOR1A	Yi Jing
TP53	Yi Jing
VHL	Yi Jing
