# Supplementary material for: A Network Pharmacology Study of the Multi-Targeting Profile of an Antiarrhythmic Chinese Medicine Xin Su Ning
Source: Front Pharmacol. 2019 Sep 25;10:1138. doi: 10.3389/fphar.2019.01138 (PMC6774044; doi:10.3389/fphar.2019.01138)
Supplement: Table S5 — XSN PHHD Pathway. [file Table_5.xlsx]

## Sheet: Sheet1
Pathway_Name	Pathway_Weight_Coefficient	RatioOfProteinInGeneSet	NumberOfProteinInGeneSet	ProteinFromNetwork	P-value	FDR	Nodes
Adrenergic signaling in cardiomyocytes	6920.49	0.0137	149	7	7.9175e-07	0.00013856	AKT1,TNNI3,CACNA1S,SCN5A,TNNC1,TNNT2,CALM1
Cardiac conduction	30643.9	0.0098	107	6	1.9196e-06	0.00025146	TNNI3,CACNA1S,SCN5A,KCNH2,KCNJ11,CALM1
DAP12 interactions	16807.5	0.0297	323	6	0.00083973	0.0083973	AKT1,JAK2,EGF,PTPN11,CALM1,TP53
Fc epsilon receptor (FCERI) signaling	16807.5	0.0373	405	6	0.002649	0.0139	AKT1,JAK2,EGF,PTPN11,CALM1,TP53
Signaling by EGFR	16807.5	0.0292	317	6	0.00076191	0.0083862	AKT1,JAK2,EGF,PTPN11,CALM1,TP53
Signaling by Interleukins	16807.5	0.0423	460	6	0.0049444	0.0198	AKT1,JAK2,EGF,PTPN11,CALM1,TP53
Signaling by PDGF	16807.5	0.0302	328	6	0.00090918	0.0090785	AKT1,JAK2,EGF,PTPN11,CALM1,TP53
Signaling by SCF-KIT	16807.5	0.0267	290	6	0.00047834	0.007175	AKT1,JAK2,EGF,PTPN11,CALM1,TP53
Signalling by NGF	16807.5	0.0387	421	6	0.003209	0.016	AKT1,JAK2,EGF,PTPN11,CALM1,TP53
Pathways in cancer	14081.6	0.0365	397	6	0.0023985	0.0139	AKT1,SMAD3,EGF,CTNNB1,PPARG,TP53
Metabolic pathways	8.0515	0.1165	1266	6	0.2782	0.2782	PON1,KYNU,GAA,SDHA,DAO,NAGS
FOXA2 and FOXA3 transcription factor networks	27636.6	0.0037	40	5	3.0651e-07	8.0611e-05	TTR,HNF4A,AKT1,KCNJ11,ABCC8
Signaling by the B Cell Receptor (BCR)	14774.8	0.0248	270	5	0.0023996	0.0139	AKT1,EGF,PTPN11,CALM1,TP53
MAPK signaling pathway	14495	0.0235	255	5	0.0018728	0.0131	CACNA1B,AKT1,CACNA1S,EGF,TP53
Generic Transcription Pathway	14080.8	0.0455	494	5	0.0279	0.0511	HNF4A,AKT1,SMAD3,PPARG,TP53
Dilated cardiomyopathy	6137.06	0.0083	90	5	1.5573e-05	0.001168	LMNA,TNNI3,CACNA1S,TNNC1,TNNT2
Hypertrophic cardiomyopathy (HCM)	6137.06	0.0076	83	5	1.0574e-05	0.00091998	LMNA,TNNI3,CACNA1S,TNNC1,TNNT2
Calcium signaling pathway	3402.79	0.0167	182	5	0.00041724	0.0064189	CHRM3,CACNA1B,CACNA1S,TNNC1,CALM1
IFN-gamma pathway	2908.23	0.0037	40	5	3.0651e-07	8.0611e-05	AKT1,JAK2,PTPN11,IFNG,CALM1
Signaling by Insulin receptor	2906.69	0.0255	277	5	0.0026793	0.0139	AKT1,JAK2,EGF,PTPN11,CALM1
Signaling by Type 1 Insulin-like Growth Factor 1 Receptor (IGF1R)	2906.69	0.0235	255	5	0.0018728	0.0131	AKT1,JAK2,EGF,PTPN11,CALM1
cAMP signaling pathway	2891.77	0.0184	200	5	0.00063883	0.0082468	AKT1,TNNI3,CACNA1S,TSHR,CALM1
Cholinergic synapse	2627.54	0.0102	111	5	4.214e-05	0.0019806	CHRM3,CACNA1B,AKT1,CACNA1S,JAK2
Insulin secretion	27635.8	0.0078	85	4	0.00022341	0.0044682	CHRM3,CACNA1S,KCNJ11,ABCC8
Herpes simplex infection	16018.5	0.017	185	4	0.0039076	0.0181	JAK2,PTPN11,IFNG,TP53
Measles	15935.5	0.0125	136	4	0.0012893	0.0108	AKT1,JAK2,IFNG,TP53
PI3K-Akt signaling pathway	15933.9	0.0314	341	4	0.0307	0.0511	AKT1,JAK2,EGF,TP53
Neurotrophin signaling pathway	14774.6	0.0111	121	4	0.00083862	0.0083862	AKT1,PTPN11,CALM1,TP53
Glioma	14691.5	0.0061	66	4	8.5154e-05	0.0027444	AKT1,EGF,CALM1,TP53
Chronic myeloid leukemia	14080.2	0.0067	73	4	0.00012524	0.0031309	AKT1,SMAD3,PTPN11,TP53
Colorectal cancer	13998	0.0057	62	4	6.6979e-05	0.0027444	AKT1,SMAD3,CTNNB1,TP53
HTLV-I infection	13998	0.0237	258	4	0.0123	0.033	AKT1,SMAD3,CTNNB1,TP53
Pancreatic cancer	13997.1	0.0061	66	4	8.5154e-05	0.0027444	AKT1,SMAD3,EGF,TP53
Huntington's disease	13988.2	0.0178	193	4	0.0045374	0.0181	SDHA,SOD1,PPARG,TP53
AP-1 transcription factor network	13986.8	0.0064	70	4	0.00010668	0.0030937	GJA1,IFNG,CTNNB1,TP53
Proteoglycans in cancer	13985.4	0.0189	205	4	0.0056059	0.0224	AKT1,PTPN11,CTNNB1,TP53
PIP3 activates AKT signaling	13984.5	0.0102	111	4	0.0006089	0.0079221	AKT1,EGF,PTPN11,TP53
Breast cancer	13902.3	0.0134	146	4	0.0016702	0.0131	AKT1,EGF,CTNNB1,TP53
Endometrial cancer	13902.3	0.0048	52	4	3.3981e-05	0.001767	AKT1,EGF,CTNNB1,TP53
Prostate cancer	13902.3	0.0082	89	4	0.00026586	0.0047854	AKT1,EGF,CTNNB1,TP53
Hepatitis C	13901.4	0.0122	133	4	0.0011881	0.0107	AKT1,LDLR,EGF,TP53
Cardiac muscle contraction	6053.92	0.0072	78	4	0.00016121	0.0035466	TNNI3,CACNA1S,TNNC1,TNNT2
RET signaling	2906.43	0.0204	222	4	0.0073911	0.0225	JAK2,EGF,PTPN11,CALM1
Signaling by Leptin	2906.43	0.0192	209	4	0.0059966	0.0225	JAK2,EGF,PTPN11,CALM1
Tuberculosis	2824.96	0.0165	179	4	0.0034763	0.0174	AKT1,JAK2,IFNG,CALM1
Gastrin-CREB signalling pathway via PKC and MAPK	2823.93	0.0346	376	4	0.0416	0.0511	CHRM3,JAK2,EGF,CALM1
Signaling by VEGF	2823.43	0.0264	287	4	0.0176	0.0351	AKT1,JAK2,EGF,CALM1
NCAM signaling for neurite out-growth	2823.3	0.0213	231	4	0.0084732	0.0254	CACNA1S,JAK2,EGF,CALM1
Signaling pathways regulating pluripotency of stem cells	2129.88	0.0131	142	4	0.0015096	0.0121	AKT1,JAK2,SMAD3,CTNNB1
AGE-RAGE signaling pathway in diabetic complications	2129.31	0.0093	101	4	0.00042793	0.0064189	AKT1,JAK2,SMAD3,COL3A1
Jak-STAT signaling pathway	2117.93	0.0145	158	4	0.0022234	0.0139	AKT1,JAK2,PTPN11,IFNG
SHP2 signaling	2117.83	0.0047	51	4	3.152e-05	0.001767	JAK2,EGF,PTPN11,IFNG
GPCR downstream signaling	2116.88	0.0842	915	4	0.3993	0.3993	CHRM3,AKT1,JAK2,TSHR
Toxoplasmosis	2034.8	0.0109	118	4	0.00076419	0.0083862	AKT1,JAK2,LDLR,IFNG
Dopaminergic synapse	1553.3	0.012	130	4	0.0010926	0.0098332	CACNA1B,AKT1,KCNJ5,CALM1
N-cadherin signaling events	957.884	0.003	33	4	5.7797e-06	0.00060687	GJA1,PTPN11,CTNNB1,CALM1
Signaling events mediated by VEGFR1 and VEGFR2	874.848	0.0058	63	4	7.1228e-05	0.0027444	AKT1,PTPN11,CTNNB1,CALM1
Ras signaling pathway	873.986	0.0211	229	4	0.0082243	0.0247	AKT1,EGF,PTPN11,CALM1
Rap1 signaling pathway	791.741	0.0195	212	4	0.0063012	0.0225	AKT1,EGF,CTNNB1,CALM1
Arrhythmogenic right ventricular cardiomyopathy (ARVC)	167.602	0.0066	72	4	0.00011881	0.0031309	GJA1,LMNA,CACNA1S,CTNNB1
Regulation of Telomerase	98.0081	0.0063	68	4	9.5477e-05	0.0028643	AKT1,SMAD3,EGF,IFNG
Type II diabetes mellitus	28228.6	0.0044	48	3	0.00064757	0.0082468	CACNA1B,KCNJ11,ABCC8
Integration of energy metabolism	27635.7	0.0085	92	3	0.0041026	0.0181	CHRM3,KCNJ11,ABCC8
Wnt signaling pathway	13997.7	0.0132	143	3	0.0136	0.033	SMAD3,CTNNB1,TP53
Hepatitis B	13997	0.0134	146	3	0.0144	0.033	AKT1,SMAD3,TP53
Thyroid cancer	13985.3	0.0027	29	3	0.00014949	0.0034383	CTNNB1,PPARG,TP53
Longevity regulating pathway	13984.5	0.0087	94	3	0.0043552	0.0181	AKT1,PPARG,TP53
Apoptosis	13984.2	0.0129	140	3	0.0129	0.033	LMNA,AKT1,TP53
Epstein-Barr virus infection	13902.8	0.0188	204	3	0.0343	0.0511	AKT1,IFNG,TP53
Glucocorticoid receptor regulatory network	13902.8	0.0072	78	3	0.0025856	0.0139	AKT1,IFNG,TP53
p53 pathway feedback loops 2	13902.1	0.0022	24	3	8.5761e-05	0.0027444	AKT1,CTNNB1,TP53
Thyroid hormone signaling pathway	13902.1	0.0109	118	3	0.0081347	0.0244	AKT1,CTNNB1,TP53
Melanoma	13901.2	0.0065	71	3	0.0019831	0.0139	AKT1,EGF,TP53
Non-small cell lung cancer	13901.2	0.0052	56	3	0.0010087	0.0090785	AKT1,EGF,TP53
Striated Muscle Contraction	6053.78	0.0029	31	3	0.00018173	0.0038162	TNNI3,TNNC1,TNNT2
RAF/MAP kinase cascade	2823.16	0.0185	201	3	0.033	0.0511	JAK2,EGF,CALM1
Th17 cell differentiation	2130.29	0.0098	107	3	0.0062268	0.0225	JAK2,SMAD3,IFNG
Interferon gamma signaling	2117.67	0.0067	73	3	0.0021451	0.0139	JAK2,PTPN11,IFNG
Interferon-gamma signaling pathway	2117.67	0.0014	15	3	2.1397e-05	0.0013908	JAK2,PTPN11,IFNG
Adipocytokine signaling pathway	2116.23	0.0064	70	3	0.001905	0.0133	AKT1,JAK2,PTPN11
CXCR4-mediated signaling events	2116.23	0.0074	80	3	0.0027762	0.0139	AKT1,JAK2,PTPN11
ErbB2/ErbB3 signaling events	2116.23	0.0034	37	3	0.00030455	0.0048728	AKT1,JAK2,PTPN11
GPVI-mediated activation cascade	2116.23	0.0045	49	3	0.00068723	0.0082468	AKT1,JAK2,PTPN11
IL6-mediated signaling events	2116.23	0.0043	47	3	0.00060939	0.0079221	AKT1,JAK2,PTPN11
Signaling events mediated by Stem cell factor receptor (c-Kit)	2116.23	0.0048	52	3	0.00081544	0.0083862	AKT1,JAK2,PTPN11
Inflammation mediated by chemokine and cytokine signaling pathway	2034.66	0.0065	71	3	0.0019831	0.0139	AKT1,JAK2,IFNG
Influenza A	2034.66	0.0161	175	3	0.0232	0.0463	AKT1,JAK2,IFNG
Endothelins	2033.42	0.0057	62	3	0.0013493	0.0108	AKT1,JAK2,COL3A1
EGFR tyrosine kinase inhibitor resistance	2033.13	0.0075	81	3	0.0028748	0.0144	AKT1,JAK2,EGF
Signaling events mediated by PTP1B	2033.13	0.0048	52	3	0.00081544	0.0083862	AKT1,JAK2,EGF
Heterotrimeric G-protein signaling pathway-Gi alpha and Gs alpha mediated pathway	960.146	0.0135	147	3	0.0147	0.033	CHRM3,KCNJ5,CALM1
Estrogen signaling pathway	959.641	0.0092	100	3	0.0051687	0.0207	AKT1,KCNJ5,CALM1
Oxytocin signaling pathway	959.517	0.0146	159	3	0.018	0.0361	CACNA1S,KCNJ5,CALM1
Calcineurin-regulated NFAT-dependent transcription in lymphocytes	875.455	0.0042	46	3	0.00057269	0.0079221	IFNG,PPARG,CALM1
IL2 signaling events mediated by PI3K	873.827	0.0032	35	3	0.00025903	0.0046626	AKT1,PTPN11,CALM1
VEGFR1 specific signals	873.827	0.0025	27	3	0.00012123	0.0031309	AKT1,PTPN11,CALM1
Response to elevated platelet cytosolic Ca2+	792.432	0.0098	106	3	0.0060683	0.0225	EGF,SOD1,CALM1
Alzheimer's disease	792.428	0.0157	171	3	0.0218	0.0436	CACNA1S,SDHA,CALM1
Visual phototransduction	791.432	0.0076	83	3	0.0030782	0.0154	TTR,LDLR,CALM1
ErbB1 downstream signaling	790.721	0.0092	100	3	0.0051687	0.0207	AKT1,EGF,CALM1
cGMP-PKG signaling pathway	790.702	0.0155	168	3	0.0208	0.0417	AKT1,CACNA1S,CALM1
Aldosterone synthesis and secretion	790.571	0.0075	82	3	0.0029754	0.0149	CACNA1S,LDLR,CALM1
Heterotrimeric G-protein signaling pathway-Gq alpha and Go alpha mediated pathway	763.506	0.0099	108	3	0.0063877	0.0225	CHRM3,CACNA1B,KCNJ5
Retrograde endocannabinoid signaling	762.877	0.0093	101	3	0.0053126	0.0213	CACNA1B,CACNA1S,KCNJ5
Serotonergic synapse	762.877	0.0104	113	3	0.0072297	0.0225	CACNA1B,CACNA1S,KCNJ5
Chagas disease (American trypanosomiasis)	97.849	0.0096	104	3	0.0057587	0.0225	AKT1,SMAD3,IFNG
HIF-1-alpha transcription factor network	96.5402	0.006	65	3	0.0015437	0.0123	HNF4A,AKT1,SMAD3
Regulation of nuclear SMAD2/3 signaling	96.5402	0.0071	77	3	0.0024934	0.0139	HNF4A,AKT1,SMAD3
FoxO signaling pathway	96.3128	0.0123	134	3	0.0115	0.033	AKT1,SMAD3,EGF
Endocytosis	96.1816	0.0239	260	3	0.0622	0.0622	LDLR,SMAD3,EGF
Osteoclast differentiation	85.4209	0.0121	132	3	0.011	0.033	AKT1,IFNG,PPARG
Signaling events mediated by Hepatocyte Growth Factor Receptor (c-Met)	84.5504	0.0074	80	3	0.0027762	0.0139	AKT1,PTPN11,CTNNB1
AMPK signaling pathway	84.1121	0.0114	124	3	0.0093055	0.0279	HNF4A,AKT1,PPARG
Phospholipase D signaling pathway	83.6887	0.0133	144	3	0.0139	0.033	AKT1,EGF,PTPN11
HIF-1 signaling pathway	2.11824	0.0095	103	3	0.0056076	0.0224	AKT1,EGF,IFNG
Focal adhesion	1.44376	0.0185	201	3	0.033	0.0511	AKT1,EGF,CTNNB1
ABC-family proteins mediated transport	27634.9	0.008	87	2	0.0372	0.0511	KCNJ11,ABCC8
Factors involved in megakaryocyte development and platelet production	15933.5	0.0101	110	2	0.0567	0.0567	JAK2,TP53
Cell cycle	13996.7	0.0114	124	2	0.0699	0.0699	SMAD3,TP53
Deubiquitination	13996.7	0.0208	226	2	0.1869	0.1869	SMAD3,TP53
Validated targets of C-MYC transcriptional activation	13996.7	0.0069	75	2	0.0284	0.0511	SMAD3,TP53
Transcriptional misregulation in cancer	13984.3	0.0166	180	2	0.1306	0.1306	PPARG,TP53
Amyotrophic lateral sclerosis (ALS)	13902.8	0.0047	51	2	0.0138	0.033	SOD1,TP53
Basal cell carcinoma	13901.8	0.0051	55	2	0.016	0.033	CTNNB1,TP53
Wnt signaling pathway	13901.8	0.0247	268	2	0.2408	0.2408	CTNNB1,TP53
Aurora A signaling	13901.1	0.0029	31	2	0.0053435	0.0214	AKT1,TP53
Central carbon metabolism in cancer	13901.1	0.0062	67	2	0.0231	0.0461	AKT1,TP53
Endocrine resistance	13901.1	0.009	98	2	0.0462	0.0511	AKT1,TP53
Huntington disease	13901.1	0.0111	121	2	0.067	0.067	AKT1,TP53
Intrinsic Pathway for Apoptosis	13901.1	0.0038	41	2	0.0091442	0.0274	AKT1,TP53
p53 pathway by glucose deprivation	13901.1	0.0009	10	2	0.00058231	0.0079221	AKT1,TP53
p53 pathway	13901.1	0.0052	57	2	0.0171	0.0341	AKT1,TP53
p53 pathway	13901.1	0.004	44	2	0.0105	0.0314	AKT1,TP53
p75(NTR)-mediated signaling	13901.1	0.0063	69	2	0.0244	0.0487	AKT1,TP53
Platinum drug resistance	13901.1	0.0069	75	2	0.0284	0.0511	AKT1,TP53
Small cell lung cancer	13901.1	0.0079	86	2	0.0365	0.0511	AKT1,TP53
Sphingolipid signaling pathway	13901.1	0.011	120	2	0.066	0.066	AKT1,TP53
Bladder cancer	13901	0.0038	41	2	0.0091442	0.0274	EGF,TP53
cell cycle: g1/s check point	2115.97	0.0019	21	2	0.0025066	0.0139	JAK2,PTPN11
cell to cell adhesion signaling	2115.97	0.0006	6	2	0.00021149	0.0044413	JAK2,PTPN11
epo signaling pathway	2115.97	0.0011	12	2	0.00083484	0.0083862	JAK2,PTPN11
EPO signaling pathway	2115.97	0.003	33	2	0.0060287	0.0225	JAK2,PTPN11
erk1/erk2 mapk signaling pathway	2115.97	0.0019	21	2	0.0025066	0.0139	JAK2,PTPN11
GMCSF-mediated signaling events	2115.97	0.0034	37	2	0.0075126	0.0225	JAK2,PTPN11
growth hormone signaling pathway	2115.97	0.0019	21	2	0.0025066	0.0139	JAK2,PTPN11
how progesterone initiates the oocyte maturation	2115.97	0.0019	21	2	0.0025066	0.0139	JAK2,PTPN11
il 3 signaling pathway	2115.97	0.0012	13	2	0.00097762	0.0090785	JAK2,PTPN11
il 6 signaling pathway	2115.97	0.0012	13	2	0.00097762	0.0090785	JAK2,PTPN11
il-2 receptor beta chain in t cell activation	2115.97	0.004	44	2	0.0105	0.0314	JAK2,PTPN11
IL3-mediated signaling events	2115.97	0.0024	26	2	0.0038003	0.0181	JAK2,PTPN11
IL5-mediated signaling events	2115.97	0.0013	14	2	0.0011313	0.0102	JAK2,PTPN11
lck and fyn tyrosine kinases in initiation of tcr activation	2115.97	0.001	11	2	0.00070304	0.0083862	JAK2,PTPN11
PDGFR-beta signaling pathway	2115.97	0.011	120	2	0.066	0.066	JAK2,PTPN11
Prolactin receptor signaling	2115.97	0.0014	15	2	0.0012958	0.0108	JAK2,PTPN11
RAF-independent MAPK1/3 activation	2115.97	0.0015	16	2	0.0014711	0.0118	JAK2,PTPN11
ras-independent pathway in nk cell-mediated cytotoxicity	2115.97	0.0023	25	2	0.0035213	0.0176	JAK2,PTPN11
role of mef2d in t-cell apoptosis	2115.97	0.0021	23	2	0.0029935	0.015	JAK2,PTPN11
t cell receptor signaling pathway	2115.97	0.0044	48	2	0.0123	0.033	JAK2,PTPN11
the co-stimulatory signal during t-cell activation	2115.97	0.0018	20	2	0.0022785	0.0139	JAK2,PTPN11
IL12-mediated signaling events	2034.4	0.0056	61	2	0.0194	0.0388	JAK2,IFNG
IL23-mediated signaling events	2034.4	0.0034	37	2	0.0075126	0.0225	JAK2,IFNG
IL27-mediated signaling events	2034.4	0.0024	26	2	0.0038003	0.0181	JAK2,IFNG
Leishmaniasis	2034.4	0.0067	73	2	0.027	0.0511	JAK2,IFNG
Th1 and Th2 cell differentiation	2034.4	0.0085	92	2	0.0412	0.0511	JAK2,IFNG
Chemokine signaling pathway	2032.97	0.0172	187	2	0.1389	0.1389	AKT1,JAK2
IL4-mediated signaling events	2032.97	0.0058	63	2	0.0206	0.0412	AKT1,JAK2
Prolactin signaling pathway	2032.97	0.0066	72	2	0.0264	0.0511	AKT1,JAK2
S1P3 pathway	2032.97	0.0023	25	2	0.0035213	0.0176	AKT1,JAK2
Notch-mediated HES/HEY network	2032.97	0.0043	47	2	0.0119	0.033	JAK2,GAA
cbl mediated ligand-induced downregulation of egf receptors pathway	2032.86	0.0006	7	2	0.00028723	0.0048728	JAK2,EGF
egf signaling pathway	2032.86	0.0019	21	2	0.0025066	0.0139	JAK2,EGF
mcalpain and friends in cell motility	2032.86	0.0024	26	2	0.0038003	0.0181	JAK2,EGF
sprouty regulation of tyrosine kinase signals	2032.86	0.0017	19	2	0.0020609	0.0139	JAK2,EGF
Circadian entrainment	959.377	0.0088	96	2	0.0445	0.0511	KCNJ5,CALM1
Neurotransmitter Receptor Binding And Downstream Transmission In The Postsynaptic Cell	959.377	0.0123	134	2	0.0799	0.0799	KCNJ5,CALM1
Regulation of cytoplasmic and nuclear SMAD2/3 signaling	886.187	0.0017	18	2	0.0018537	0.0131	SMAD3,CALM1
Platelet homeostasis	873.563	0.0054	59	2	0.0182	0.0364	PTPN11,CALM1
Calcium signaling in the CD4+ TCR pathway	791.993	0.0025	27	2	0.0040892	0.0181	IFNG,CALM1
Downstream signaling in na&#xef;ve CD8+ T cells	791.993	0.0059	64	2	0.0212	0.0424	IFNG,CALM1
Beta-catenin independent WNT signaling	791.318	0.0103	112	2	0.0585	0.0585	CTNNB1,CALM1
Melanogenesis	791.318	0.0093	101	2	0.0487	0.0511	CTNNB1,CALM1
Signaling by Rho GTPases	791.318	0.0304	330	2	0.3215	0.3215	CTNNB1,CALM1
Gastric acid secretion	791.067	0.0069	75	2	0.0284	0.0511	CHRM3,CALM1
Salivary secretion	791.067	0.0083	90	2	0.0396	0.0511	CHRM3,CALM1
Transport of inorganic cations/anions and amino acids/oligopeptides	790.818	0.0051	55	2	0.016	0.033	SLC1A3,CALM1
BCR signaling pathway	790.561	0.006	65	2	0.0218	0.0436	AKT1,CALM1
Glucagon signaling pathway	790.561	0.0095	103	2	0.0504	0.0511	AKT1,CALM1
Insulin signaling pathway	790.561	0.0129	140	2	0.086	0.086	AKT1,CALM1
Insulin-mediated glucose transport	790.561	0.0025	27	2	0.0040892	0.0181	AKT1,CALM1
Metabolism of nitric oxide	790.561	0.0017	18	2	0.0018537	0.0131	AKT1,CALM1
T cell activation	790.561	0.0075	81	2	0.0327	0.0511	AKT1,CALM1
Translocation of GLUT4 to the plasma membrane	790.561	0.0048	52	2	0.0144	0.033	AKT1,CALM1
Metabolism of carbohydrates	790.559	0.0214	233	2	0.1958	0.1958	GAA,CALM1
GnRH signaling pathway	790.438	0.0085	92	2	0.0412	0.0511	CACNA1S,CALM1
Renin secretion	790.438	0.006	65	2	0.0218	0.0436	CACNA1S,CALM1
Vascular smooth muscle contraction	790.438	0.0111	121	2	0.067	0.067	CACNA1S,CALM1
Morphine addiction	762.736	0.0084	91	2	0.0404	0.0511	CACNA1B,KCNJ5
GABAergic synapse	593.798	0.0081	88	2	0.038	0.0511	CACNA1B,CACNA1S
Inflammatory bowel disease (IBD)	97.5851	0.006	65	2	0.0218	0.0436	SMAD3,IFNG
TGF-beta signaling pathway	97.5851	0.0077	84	2	0.0349	0.0511	SMAD3,IFNG
Adherens junction	96.9107	0.0066	72	2	0.0264	0.0511	SMAD3,CTNNB1
Hippo signaling pathway	96.9107	0.0142	154	2	0.1011	0.1011	SMAD3,CTNNB1
TGF-beta receptor signaling	96.9107	0.0043	47	2	0.0119	0.033	SMAD3,CTNNB1
IL2-mediated signaling events	84.961	0.005	54	2	0.0154	0.033	PTPN11,IFNG
Natural killer cell mediated cytotoxicity	84.961	0.0124	135	2	0.0809	0.0809	PTPN11,IFNG
Fatty acid, triacylglycerol, and ketone body metabolism	84.4825	0.0179	195	2	0.1485	0.1485	CPT2,PPARG
PPAR signaling pathway	84.4825	0.0066	72	2	0.0264	0.0511	CPT2,PPARG
inactivation of gsk3 by akt causes accumulation of b-catenin in alveolar macrophages	84.3206	0.0033	36	2	0.0071276	0.0225	GJA1,CTNNB1
Leukocyte transendothelial migration	84.2866	0.0107	116	2	0.0622	0.0622	PTPN11,CTNNB1
Apoptotic execution phase	84.1615	0.0043	47	2	0.0119	0.033	LMNA,CTNNB1
Arf6 trafficking events	84.1615	0.0031	34	2	0.0063856	0.0225	TSHR,CTNNB1
Thyroid hormone synthesis	84.1426	0.0068	74	2	0.0277	0.0511	TTR,TSHR
GPCR ligand binding	83.9103	0.0363	395	2	0.4041	0.4041	CHRM3,TSHR
Neuroactive ligand-receptor interaction	83.9103	0.0256	278	2	0.2538	0.2538	CHRM3,TSHR
Angiopoietin receptor Tie2-mediated signaling	83.5296	0.0046	50	2	0.0133	0.033	AKT1,PTPN11
Costimulation by the CD28 family	83.5296	0.0058	63	2	0.0206	0.0412	AKT1,PTPN11
Fc-epsilon receptor I signaling in mast cells	83.5296	0.0057	62	2	0.02	0.0399	AKT1,PTPN11
FGF signaling pathway	83.5296	0.0043	47	2	0.0119	0.033	AKT1,PTPN11
FGF signaling pathway	83.5296	0.0085	92	2	0.0412	0.0511	AKT1,PTPN11
IGF1 pathway	83.5296	0.0028	30	2	0.0050153	0.0201	AKT1,PTPN11
Insulin Pathway	83.5296	0.0041	45	2	0.0109	0.0328	AKT1,PTPN11
Insulin resistance	83.5296	0.01	109	2	0.0558	0.0558	AKT1,PTPN11
Integrins in angiogenesis	83.5296	0.0043	47	2	0.0119	0.033	AKT1,PTPN11
Renal cell carcinoma	83.5296	0.0062	67	2	0.0231	0.0461	AKT1,PTPN11
TCR signaling in na&#xef;ve CD4+ T cells	83.5296	0.0062	67	2	0.0231	0.0461	AKT1,PTPN11
Gap junction	83.4588	0.0081	88	2	0.038	0.0511	GJA1,EGF
EGF receptor (ErbB1) signaling pathway	83.4248	0.0027	29	2	0.0046968	0.0188	EGF,PTPN11
FAS signaling pathway	83.4046	0.003	33	2	0.0060287	0.0225	LMNA,AKT1
Regulation of lipolysis in adipocytes	83.4046	0.0052	56	2	0.0165	0.033	AKT1,TSHR
Arf6 signaling events	83.2998	0.0032	35	2	0.0067519	0.0225	EGF,TSHR
Peroxisome	3.37276	0.0076	83	2	0.0342	0.0511	SOD1,DAO
Non-alcoholic fatty liver disease (NAFLD)	2.25429	0.0139	151	2	0.0978	0.0978	AKT1,SDHA
Longevity regulating pathway - multiple species	2.23969	0.0059	64	2	0.0212	0.0424	AKT1,SOD1
Amoebiasis	2.14812	0.009	98	2	0.0462	0.0511	COL3A1,IFNG
T cell receptor signaling pathway	1.95917	0.0097	105	2	0.0522	0.0522	AKT1,IFNG
Cytokine-cytokine receptor interaction	1.85437	0.0244	265	2	0.2369	0.2369	EGF,IFNG
Extracellular matrix organization	1.45473	0.0235	255	2	0.224	0.224	TTR,COL3A1
Coregulation of Androgen receptor activity	1.2847	0.0055	60	2	0.0188	0.0376	AKT1,CTNNB1
E-cadherin signaling in keratinocytes	1.2847	0.0019	21	2	0.0025066	0.0139	AKT1,CTNNB1
E-cadherin signaling in the nascent adherens junction	1.2847	0.0033	36	2	0.0071276	0.0225	AKT1,CTNNB1
FoxO family signaling	1.2847	0.0044	48	2	0.0123	0.033	AKT1,CTNNB1
Integrin-linked kinase signaling	1.2847	0.0041	45	2	0.0109	0.0328	AKT1,CTNNB1
TCF dependent signaling in response to WNT	1.2847	0.0146	159	2	0.1066	0.1066	AKT1,CTNNB1
Tight junction	1.2847	0.0126	137	2	0.0829	0.0829	AKT1,CTNNB1
Neutrophil degranulation	1.26321	0.0362	393	2	0.4016	0.4016	TTR,GAA
Posttranslational regulation of adherens junction stability and dissassembly	1.1799	0.0044	48	2	0.0123	0.033	EGF,CTNNB1
Stabilization and expansion of the E-cadherin adherens junction	1.1799	0.0039	42	2	0.0095748	0.0287	EGF,CTNNB1
Retinoid metabolism and transport	1.1346	0.0035	38	2	0.0079068	0.0237	TTR,LDLR
Regulation of actin cytoskeleton	0.928688	0.0197	214	2	0.1719	0.1719	CHRM3,EGF
Platelet activation	0.716692	0.0112	122	2	0.0679	0.0679	AKT1,COL3A1
Regulation of beta-cell development	0.65041	0.0029	31	2	0.0053435	0.0214	HNF4A,AKT1
a6b1 and a6b4 Integrin signaling	0.422935	0.0032	35	2	0.0067519	0.0225	AKT1,EGF
Ceramide signaling pathway	0.422935	0.0044	48	2	0.0123	0.033	AKT1,EGF
Choline metabolism in cancer	0.422935	0.0093	101	2	0.0487	0.0511	AKT1,EGF
ErbB signaling pathway	0.422935	0.0081	88	2	0.038	0.0511	AKT1,EGF
Signaling by ERBB2	0.422935	0.004	43	2	0.01	0.03	AKT1,EGF
Signaling by PTK6	0.422935	0.0056	61	2	0.0194	0.0388	AKT1,EGF
Thromboxane A2 receptor signaling	0.422935	0.005	54	2	0.0154	0.033	AKT1,EGF
Clathrin-mediated endocytosis	0.291758	0.0108	117	2	0.0631	0.0631	LDLR,EGF
BARD1 signaling events	13900.8	0.0027	29	1	0.0966	0.0966	TP53
Cell Cycle Checkpoints	13900.8	0.0151	164	1	0.4389	0.4389	TP53
Direct p53 effectors	13900.8	0.0121	132	1	0.3715	0.3715	TP53
DNA Damage/Telomere Stress Induced Senescence	13900.8	0.0025	27	1	0.0902	0.0902	TP53
DNA Double Strand Break Response	13900.8	0.0041	45	1	0.1459	0.1459	TP53
Hypoxic and oxygen homeostasis regulation of HIF-1-alpha	13900.8	0.0017	19	1	0.0643	0.0643	TP53
LKB1 signaling events	13900.8	0.004	43	1	0.1399	0.1399	TP53
MicroRNAs in cancer	13900.8	0.0275	299	1	0.6536	0.6536	TP53
Mitotic G2-G2/M phases	13900.8	0.016	174	1	0.4585	0.4585	TP53
Oncogene Induced Senescence	13900.8	0.0029	32	1	0.106	0.106	TP53
Oxidative Stress Induced Senescence	13900.8	0.0061	66	1	0.2067	0.2067	TP53
P53 pathway feedback loops 1	13900.8	0.0006	6	1	0.0208	0.0415	TP53
p53 signaling pathway	13900.8	0.0063	69	1	0.215	0.215	TP53
PLK3 signaling events	13900.8	0.0005	5	1	0.0173	0.0347	TP53
Pre-NOTCH Expression and Processing	13900.8	0.0035	38	1	0.1246	0.1246	TP53
Protein folding	13900.8	0.0059	64	1	0.2011	0.2011	TP53
Signaling events mediated by HDAC Class III	13900.8	0.0024	26	1	0.087	0.087	TP53
Signaling mediated by p38-alpha and p38-beta	13900.8	0.0032	35	1	0.1154	0.1154	TP53
SUMOylation	13900.8	0.0098	106	1	0.311	0.311	TP53
Viral carcinogenesis	13900.8	0.0187	203	1	0.5116	0.5116	TP53
ABC transporters	13817.5	0.0041	45	1	0.1459	0.1459	ABCC8
activation of csk by camp-dependent protein kinase inhibits signaling through the t cell receptor	2032.71	0.0038	41	1	0.1338	0.1338	JAK2
agrin in postsynaptic differentiation	2032.71	0.0041	45	1	0.1459	0.1459	JAK2
angiotensin ii mediated activation of jnk pathway via pyk2 dependent signaling	2032.71	0.003	33	1	0.1091	0.1091	JAK2
atm signaling pathway	2032.71	0.0014	15	1	0.0511	0.0511	JAK2
bcr signaling pathway	2032.71	0.0024	26	1	0.087	0.087	JAK2
bioactive peptide induced signaling pathway	2032.71	0.0024	26	1	0.087	0.087	JAK2
calcium signaling by hbx of hepatitis b virus	2032.71	0.0014	15	1	0.0511	0.0511	JAK2
ccr3 signaling in eosinophils	2032.71	0.002	22	1	0.0741	0.0741	JAK2
cdc25 and chk1 regulatory pathway in response to dna damage	2032.71	0.0006	6	1	0.0208	0.0415	JAK2
cell cycle: g2/m checkpoint	2032.71	0.0016	17	1	0.0578	0.0578	JAK2
chaperones modulate interferon signaling pathway	2032.71	0.0007	8	1	0.0276	0.0511	JAK2
Chromatin modifying enzymes	2032.71	0.019	206	1	0.5168	0.5168	JAK2
ErbB4 signaling events	2032.71	0.0026	28	1	0.0934	0.0934	JAK2
erk and pi-3 kinase are necessary for collagen binding in corneal epithelia	2032.71	0.0028	30	1	0.0997	0.0997	JAK2
erythropoietin mediated neuroprotection through nf-kb	2032.71	0.0011	12	1	0.0411	0.0511	JAK2
fc epsilon receptor i signaling in mast cells	2032.71	0.0023	25	1	0.0838	0.0838	JAK2
gamma-aminobutyric acid receptor life cycle pathway	2032.71	0.0011	12	1	0.0411	0.0511	JAK2
Growth hormone receptor signaling	2032.71	0.0022	24	1	0.0806	0.0806	JAK2
g-secretase mediated erbb4 signaling pathway	2032.71	0.0009	10	1	0.0344	0.0511	JAK2
hiv-1 defeats host-mediated resistance by cem15	2032.71	0.0003	3	1	0.0104	0.0313	JAK2
ifn alpha signaling pathway	2032.71	0.0007	8	1	0.0276	0.0511	JAK2
ifn gamma signaling pathway	2032.71	0.0004	4	1	0.0139	0.033	JAK2
il 2 signaling pathway	2032.71	0.001	11	1	0.0378	0.0511	JAK2
il 4 signaling pathway	2032.71	0.0013	14	1	0.0478	0.0511	JAK2
il-10 anti-inflammatory signaling pathway	2032.71	0.0011	12	1	0.0411	0.0511	JAK2
il12 and stat4 dependent signaling pathway in th1 development	2032.71	0.0012	13	1	0.0445	0.0511	JAK2
il22 soluble receptor signaling pathway	2032.71	0.0009	10	1	0.0344	0.0511	JAK2
il-7 signal transduction	2032.71	0.001	11	1	0.0378	0.0511	JAK2
inhibition of cellular proliferation by gleevec	2032.71	0.002	22	1	0.0741	0.0741	JAK2
integrin signaling pathway	2032.71	0.003	33	1	0.1091	0.1091	JAK2
links between pyk2 and map kinases	2032.71	0.0021	23	1	0.0774	0.0774	JAK2
lissencephaly gene (lis1) in neuronal migration and development	2032.71	0.0018	20	1	0.0676	0.0676	JAK2
neuroregulin receptor degredation protein-1 controls erbb3 receptor recycling	2032.71	0.0006	6	1	0.0208	0.0415	JAK2
no2-dependent il-12 pathway in nk cells	2032.71	0.0009	10	1	0.0344	0.0511	JAK2
pdgf signaling pathway	2032.71	0.0024	26	1	0.087	0.087	JAK2
pelp1 modulation of estrogen receptor activity	2032.71	0.0006	6	1	0.0208	0.0415	JAK2
phosphoinositides and their downstream targets	2032.71	0.0016	17	1	0.0578	0.0578	JAK2
phospholipids as signalling intermediaries	2032.71	0.0029	31	1	0.1029	0.1029	JAK2
pten dependent cell cycle arrest and apoptosis	2032.71	0.0016	17	1	0.0578	0.0578	JAK2
rb tumor suppressor/checkpoint signaling in response to dna damage	2032.71	0.001	11	1	0.0378	0.0511	JAK2
regulation of splicing through sam68	2032.71	0.0008	9	1	0.031	0.0511	JAK2
role of erbb2 in signal transduction and oncology	2032.71	0.0026	28	1	0.0934	0.0934	JAK2
role of erk5 in neuronal survival pathway	2032.71	0.0021	23	1	0.0774	0.0774	JAK2
role of nicotinic acetylcholine receptors in the regulation of apoptosis	2032.71	0.0015	16	1	0.0545	0.0545	JAK2
stat3 signaling pathway	2032.71	0.0006	6	1	0.0208	0.0415	JAK2
thrombin signaling and protease-activated receptors	2032.71	0.0025	27	1	0.0902	0.0902	JAK2
tpo signaling pathway	2032.71	0.0023	25	1	0.0838	0.0838	JAK2
tsp-1 induced apoptosis in microvascular endothelial cell	2032.71	0.0007	8	1	0.0276	0.0511	JAK2
ucalpain and friends in cell spread	2032.71	0.0014	15	1	0.0511	0.0511	JAK2
vegf hypoxia and angiogenesis	2032.71	0.0026	28	1	0.0934	0.0934	JAK2
y branching of actin filaments	2032.71	0.0015	16	1	0.0545	0.0545	JAK2
Alcoholism	790.298	0.0166	180	1	0.4699	0.4699	CALM1
Amphetamine addiction	790.298	0.0063	68	1	0.2122	0.2122	CALM1
B cell activation	790.298	0.0054	59	1	0.1869	0.1869	CALM1
Cellular roles of Anthrax toxin	790.298	0.0017	19	1	0.0643	0.0643	CALM1
C-type lectin receptors (CLRs)	790.298	0.0128	139	1	0.3869	0.3869	CALM1
DAG and IP3 signaling	790.298	0.0029	32	1	0.106	0.106	CALM1
Heterotrimeric G-protein signaling pathway-rod outer segment phototransduction	790.298	0.0026	28	1	0.0934	0.0934	CALM1
Inflammatory mediator regulation of TRP channels	790.298	0.0091	99	1	0.2937	0.2937	CALM1
Inositol phosphate metabolism	790.298	0.0034	37	1	0.1216	0.1216	CALM1
Ion channel transport	790.298	0.0156	169	1	0.4488	0.4488	CALM1
Lissencephaly gene (LIS1) in neuronal migration and development	790.298	0.0026	28	1	0.0934	0.0934	CALM1
Long-term potentiation	790.298	0.0062	67	1	0.2094	0.2094	CALM1
Olfactory transduction	790.298	0.0385	418	1	0.7747	0.7747	CALM1
Oocyte meiosis	790.298	0.0114	124	1	0.3534	0.3534	CALM1
Opioid Signalling	790.298	0.0057	62	1	0.1954	0.1954	CALM1
p38 MAPK signaling pathway	790.298	0.0025	27	1	0.0902	0.0902	CALM1
Pertussis	790.298	0.007	76	1	0.2341	0.2341	CALM1
Phosphatidylinositol signaling system	790.298	0.0091	99	1	0.2937	0.2937	CALM1
Phototransduction	790.298	0.0026	28	1	0.0934	0.0934	CALM1
Protein methylation	790.298	0.0016	17	1	0.0578	0.0578	CALM1
Role of Calcineurin-dependent NFAT signaling in lymphocytes	790.298	0.0048	52	1	0.1666	0.1666	CALM1
Smooth Muscle Contraction	790.298	0.003	33	1	0.1091	0.1091	CALM1
Depolarization of the Presynaptic Terminal Triggers the Opening of Calcium Channels	593.657	0.0006	7	1	0.0242	0.0484	CACNA1B
Endogenous_cannabinoid_signaling	593.657	0.0003	3	1	0.0104	0.0313	CACNA1B
GABA-B_receptor_II_signaling	593.657	0.0003	3	1	0.0104	0.0313	CACNA1B
Nicotine addiction	593.657	0.0037	40	1	0.1308	0.1308	CACNA1B
Synaptic vesicle cycle	593.657	0.0058	63	1	0.1982	0.1982	CACNA1B
M/G1 Transition	95.8898	0.0078	85	1	0.258	0.258	GMNN
Regulation of DNA replication	95.8898	0.0068	74	1	0.2287	0.2287	GMNN
Signaling by Activin	95.8898	0.0012	13	1	0.0445	0.0511	SMAD3
Signaling by NODAL	95.8898	0.0017	19	1	0.0643	0.0643	SMAD3
Signaling by TGF-beta Receptor Complex	95.8898	0.0067	73	1	0.226	0.226	SMAD3
TGF-beta signaling pathway	95.8898	0.0074	80	1	0.2448	0.2448	SMAD3
Validated targets of C-MYC transcriptional repression	95.8898	0.0055	60	1	0.1897	0.1897	SMAD3
basic mechanism of action of ppara pparb(d) and pparg and effects on gene expression	83.4617	0.0005	5	1	0.0173	0.0347	PPARG
Noncanonical Wnt signaling pathway	83.4617	0.0029	32	1	0.106	0.106	PPARG
Regulation of retinoblastoma protein	83.4617	0.0059	64	1	0.2011	0.2011	PPARG
role of ppar-gamma coactivators in obesity and thermogenesis	83.4617	0.0004	4	1	0.0139	0.033	PPARG
RXR and RAR heterodimerization with other nuclear receptor	83.4617	0.0024	26	1	0.087	0.087	PPARG
Signaling events mediated by HDAC Class I	83.4617	0.0052	56	1	0.1783	0.1783	PPARG
Transcriptional regulation of white adipocyte differentiation	83.4617	0.0077	84	1	0.2554	0.2554	PPARG
visceral fat deposits and the metabolic syndrome	83.4617	0.0006	6	1	0.0208	0.0415	PPARG
Gap junction trafficking and regulation	83.2998	0.0008	9	1	0.031	0.0511	GJA1
Validated transcriptional targets of AP1 family members Fra1 and Fra2	83.2998	0.0034	37	1	0.1216	0.1216	GJA1
Axon guidance	83.2657	0.0163	177	1	0.4642	0.4642	PTPN11
Cell surface interactions at the vascular wall	83.2657	0.0191	208	1	0.5202	0.5202	PTPN11
cyclins and cell cycle regulation	83.2657	0.0017	19	1	0.0643	0.0643	PTPN11
Epithelial cell signaling in Helicobacter pylori infection	83.2657	0.0063	68	1	0.2122	0.2122	PTPN11
fas signaling pathway (cd95)	83.2657	0.0017	19	1	0.0643	0.0643	PTPN11
igf-1 signaling pathway	83.2657	0.0019	21	1	0.0709	0.0709	PTPN11
IL2 signaling events mediated by STAT5	83.2657	0.0026	28	1	0.0934	0.0934	PTPN11
insulin signaling pathway	83.2657	0.0011	12	1	0.0411	0.0511	PTPN11
Interferon alpha/beta signaling	83.2657	0.0063	68	1	0.2122	0.2122	PTPN11
Netrin-1 signaling	83.2657	0.0039	42	1	0.1368	0.1368	PTPN11
Neurotrophic factor-mediated Trk receptor signaling	83.2657	0.0055	60	1	0.1897	0.1897	PTPN11
Signal regulatory protein (SIRP) family interactions	83.2657	0.0011	12	1	0.0411	0.0511	PTPN11
Signaling by FGFR1	83.2657	0.0045	49	1	0.1578	0.1578	PTPN11
Signaling by FGFR2	83.2657	0.0065	71	1	0.2205	0.2205	PTPN11
Signaling by FGFR3	83.2657	0.0037	40	1	0.1308	0.1308	PTPN11
Signaling by FGFR4	83.2657	0.0038	41	1	0.1338	0.1338	PTPN11
Signaling by MET	83.2657	0.0048	52	1	0.1666	0.1666	PTPN11
Signaling events regulated by Ret tyrosine kinase	83.2657	0.0036	39	1	0.1277	0.1277	PTPN11
Toll-Like Receptors Cascades	83.2657	0.013	141	1	0.3912	0.3912	PTPN11
Autoimmune thyroid disease	83.1407	0.0049	53	1	0.1695	0.1695	TSHR
Caspase cascade in apoptosis	83.1407	0.0048	52	1	0.1666	0.1666	LMNA
Meiotic synapsis	83.1407	0.0033	36	1	0.1185	0.1185	LMNA
Mitotic Metaphase and Anaphase	83.1407	0.0151	164	1	0.4389	0.4389	LMNA
Mitotic Prophase	83.1407	0.0061	66	1	0.2067	0.2067	LMNA
Unfolded Protein Response (UPR)	83.1407	0.0072	78	1	0.2395	0.2395	LMNA
L1CAM interactions	76.0138	0.0075	82	1	0.2501	0.2501	SCN5A
Carbon metabolism	1.99042	0.0105	114	1	0.3302	0.3302	SDHA
Citrate cycle (TCA cycle)	1.99042	0.0028	30	1	0.0997	0.0997	SDHA
Oxidative phosphorylation	1.99042	0.0122	133	1	0.3737	0.3737	SDHA
Parkinson's disease	1.99042	0.0131	142	1	0.3934	0.3934	SDHA
The citric acid (TCA) cycle and respiratory electron transport	1.99042	0.0148	161	1	0.4329	0.4329	SDHA
cardiac protection against ros	1.97582	0.0009	10	1	0.0344	0.0511	SOD1
Detoxification of Reactive Oxygen Species	1.97582	0.0029	31	1	0.1029	0.1029	SOD1
FOXA1 transcription factor network	1.97582	0.0039	42	1	0.1368	0.1368	SOD1
Prion diseases	1.97582	0.0032	35	1	0.1154	0.1154	SOD1
the igf-1 receptor and longevity	1.97582	0.0015	16	1	0.0545	0.0545	SOD1
Validated nuclear estrogen receptor alpha network	1.97582	0.0057	62	1	0.1954	0.1954	SOD1
Arachidonic acid metabolism	1.73208	0.0033	36	1	0.1185	0.1185	PON1
African trypanosomiasis	1.6953	0.0032	35	1	0.1154	0.1154	IFNG
Allograft rejection	1.6953	0.0035	38	1	0.1246	0.1246	IFNG
Antigen processing and presentation	1.6953	0.0071	77	1	0.2368	0.2368	IFNG
ATF-2 transcription factor network	1.6953	0.0053	58	1	0.184	0.184	IFNG
Autophagy	1.6953	0.0037	40	1	0.1308	0.1308	IFNG
Graft-versus-host disease	1.6953	0.0038	41	1	0.1338	0.1338	IFNG
IL12 signaling mediated by STAT4	1.6953	0.0029	31	1	0.1029	0.1029	IFNG
Malaria	1.6953	0.0045	49	1	0.1578	0.1578	IFNG
Proteasome	1.6953	0.004	44	1	0.1429	0.1429	IFNG
Rheumatoid arthritis	1.6953	0.0083	90	1	0.271	0.271	IFNG
Salmonella infection	1.6953	0.0079	86	1	0.2606	0.2606	IFNG
Systemic lupus erythematosus	1.6953	0.0122	133	1	0.3737	0.3737	IFNG
Type I diabetes mellitus	1.6953	0.004	43	1	0.1399	0.1399	IFNG
Tryptophan metabolism	1.64992	0.0037	40	1	0.1308	0.1308	KYNU
Arginine and proline metabolism	1.39694	0.0046	50	1	0.1607	0.1607	DAO
D-Arginine and D-ornithine metabolism	1.39694	0.0001	1	1	0.0034909	0.0175	DAO
Glycine, serine and threonine metabolism	1.39694	0.0037	40	1	0.1308	0.1308	DAO
2-Oxocarboxylic acid metabolism	1.02083	0.0017	18	1	0.0611	0.0611	NAGS
Alzheimer disease-presenilin pathway	1.02083	0.0102	111	1	0.323	0.323	CTNNB1
Arginine biosynthesis	1.02083	0.0019	21	1	0.0709	0.0709	NAGS
Bacterial invasion of epithelial cells	1.02083	0.0072	78	1	0.2395	0.2395	CTNNB1
Biosynthesis of amino acids	1.02083	0.0069	75	1	0.2314	0.2314	NAGS
Cadherin signaling pathway	1.02083	0.0092	100	1	0.2962	0.2962	CTNNB1
Canonical Wnt signaling pathway	1.02083	0.0018	20	1	0.0676	0.0676	CTNNB1
CDC42 signaling events	1.02083	0.0064	70	1	0.2177	0.2177	CTNNB1
Cytosolic sensors of pathogen-associated DNA	1.02083	0.0062	67	1	0.2094	0.2094	CTNNB1
Degradation of beta catenin	1.02083	0.0017	18	1	0.0611	0.0611	CTNNB1
Degradation of beta-catenin by the destruction complex	1.02083	0.0064	70	1	0.2177	0.2177	CTNNB1
Fatty acid degradation	1.02083	0.004	44	1	0.1429	0.1429	CPT2
Fatty acid metabolism	1.02083	0.0044	48	1	0.1548	0.1548	CPT2
multi-step regulation of transcription by pitx2	1.02083	0.0024	26	1	0.087	0.087	CTNNB1
Myogenesis	1.02083	0.0022	24	1	0.0806	0.0806	CTNNB1
Nectin adhesion pathway	1.02083	0.0028	30	1	0.0997	0.0997	CTNNB1
Pathogenic Escherichia coli infection	1.02083	0.0051	55	1	0.1754	0.1754	CTNNB1
Presenilin action in Notch and Wnt signaling	1.02083	0.0041	45	1	0.1459	0.1459	CTNNB1
RAC1 signaling pathway	1.02083	0.005	54	1	0.1725	0.1725	CTNNB1
Regulation of nuclear beta catenin signaling and target gene transcription	1.02083	0.0074	80	1	0.2448	0.2448	CTNNB1
segmentation clock	1.02083	0.0019	21	1	0.0709	0.0709	CTNNB1
trefoil factors initiate mucosal healing	1.02083	0.0029	31	1	0.1029	0.1029	CTNNB1
wnt signaling pathway	1.02083	0.0028	30	1	0.0997	0.0997	CTNNB1
Amyloid fiber formation	1.0019	0.0043	47	1	0.1519	0.1519	TTR
Alzheimer disease-amyloid secretase pathway	0.769623	0.0054	59	1	0.1869	0.1869	CHRM3
Pancreatic secretion	0.769623	0.0088	96	1	0.2862	0.2862	CHRM3
Taste transduction	0.769623	0.0076	83	1	0.2527	0.2527	CHRM3
Glutamatergic synapse	0.520836	0.0105	114	1	0.3302	0.3302	SLC1A3
Neurotransmitter Release Cycle	0.520836	0.0037	40	1	0.1308	0.1308	SLC1A3
Beta1 integrin cell surface interactions	0.452823	0.0061	66	1	0.2067	0.2067	COL3A1
Binding and Uptake of Ligands by Scavenger Receptors	0.452823	0.0114	124	1	0.3534	0.3534	COL3A1
Integrin signalling pathway	0.452823	0.0145	158	1	0.4268	0.4268	COL3A1
Protein digestion and absorption	0.452823	0.0083	90	1	0.271	0.271	COL3A1
Maturity onset diabetes of the young	0.38654	0.0024	26	1	0.087	0.087	HNF4A
Acute myeloid leukemia	0.26387	0.0052	57	1	0.1811	0.1811	AKT1
Angiogenesis	0.26387	0.0061	66	1	0.2067	0.2067	AKT1
B cell receptor signaling pathway	0.26387	0.0067	73	1	0.226	0.226	AKT1
Carbohydrate digestion and absorption	0.26387	0.0042	46	1	0.1489	0.1489	AKT1
CD40/CD40L signaling	0.26387	0.0027	29	1	0.0966	0.0966	AKT1
Class I PI3K signaling events mediated by Akt	0.26387	0.0032	35	1	0.1154	0.1154	AKT1
CXCR3-mediated signaling events	0.26387	0.0032	35	1	0.1154	0.1154	AKT1
EGF receptor signaling pathway	0.26387	0.0075	82	1	0.2501	0.2501	AKT1
Endothelin signaling pathway	0.26387	0.0051	55	1	0.1754	0.1754	AKT1
FAS (CD95) signaling pathway	0.26387	0.0029	32	1	0.106	0.106	AKT1
Fc epsilon RI signaling pathway	0.26387	0.0064	70	1	0.2177	0.2177	AKT1
Fc gamma R-mediated phagocytosis	0.26387	0.0086	93	1	0.2786	0.2786	AKT1
Hedgehog signaling events mediated by Gli proteins	0.26387	0.0044	48	1	0.1548	0.1548	AKT1
Hypoxia response via HIF activation	0.26387	0.0022	24	1	0.0806	0.0806	AKT1
IL8- and CXCR1-mediated signaling events	0.26387	0.0026	28	1	0.0934	0.0934	AKT1
IL8- and CXCR2-mediated signaling events	0.26387	0.0031	34	1	0.1123	0.1123	AKT1
Integrin alphaIIb beta3 signaling	0.26387	0.0025	27	1	0.0902	0.0902	AKT1
Interleukin signaling pathway	0.26387	0.0051	55	1	0.1754	0.1754	AKT1
LPA receptor mediated events	0.26387	0.0058	63	1	0.1982	0.1982	AKT1
Mitotic G1-G1/S phases	0.26387	0.012	130	1	0.367	0.367	AKT1
mTOR signaling pathway	0.26387	0.0142	154	1	0.4186	0.4186	AKT1
mTOR signaling pathway	0.26387	0.0059	64	1	0.2011	0.2011	AKT1
Nephrin/Neph1 signaling in the kidney podocyte	0.26387	0.0023	25	1	0.0838	0.0838	AKT1
Nongenotropic Androgen signaling	0.26387	0.0023	25	1	0.0838	0.0838	AKT1
PI3 kinase pathway	0.26387	0.0024	26	1	0.087	0.087	AKT1
Plasma membrane estrogen receptor signaling	0.26387	0.0039	42	1	0.1368	0.1368	AKT1
Platelet Aggregation (Plug Formation)	0.26387	0.0034	37	1	0.1216	0.1216	AKT1
Progesterone-mediated oocyte maturation	0.26387	0.009	98	1	0.2912	0.2912	AKT1
RAB GEFs exchange GTP for GDP on RABs	0.26387	0.0067	73	1	0.226	0.226	AKT1
Ras Pathway	0.26387	0.0058	63	1	0.1982	0.1982	AKT1
ras signaling pathway	0.26387	0.002	22	1	0.0741	0.0741	AKT1
Reelin signaling pathway	0.26387	0.0026	28	1	0.0934	0.0934	AKT1
regulation of eif-4e and p70s6 kinase	0.26387	0.0021	23	1	0.0774	0.0774	AKT1
Regulation of mRNA stability by proteins that bind AU-rich elements	0.26387	0.008	87	1	0.2632	0.2632	AKT1
Retinoic acid receptors-mediated signaling	0.26387	0.0028	30	1	0.0997	0.0997	AKT1
Signaling events mediated by the Hedgehog family	0.26387	0.0021	23	1	0.0774	0.0774	AKT1
TCR signaling in na&#xef;ve CD8+ T cells	0.26387	0.005	54	1	0.1725	0.1725	AKT1
TNF signaling pathway	0.26387	0.0101	110	1	0.3206	0.3206	AKT1
Toll-like receptor signaling pathway	0.26387	0.0098	106	1	0.311	0.311	AKT1
transcription factor creb and its extracellular signals	0.26387	0.0022	24	1	0.0806	0.0806	AKT1
Trk receptor signaling mediated by PI3K and PLC-gamma	0.26387	0.0033	36	1	0.1185	0.1185	AKT1
VEGF signaling pathway	0.26387	0.0056	61	1	0.1926	0.1926	AKT1
VEGF signaling pathway	0.26387	0.0017	18	1	0.0611	0.0611	AKT1
VEGFR3 signaling in lymphatic endothelium	0.26387	0.0023	25	1	0.0838	0.0838	AKT1
Galactose metabolism	0.261305	0.0029	31	1	0.1029	0.1029	GAA
Lysosome	0.261305	0.0113	123	1	0.3512	0.3512	GAA
Starch and sucrose metabolism	0.261305	0.0033	36	1	0.1185	0.1185	GAA
EGFR-dependent Endothelin signaling events	0.159066	0.0008	9	1	0.031	0.0511	EGF
ErbB receptor signaling network	0.159066	0.0014	15	1	0.0511	0.0511	EGF
Internalization of ErbB1	0.159066	0.0032	35	1	0.1154	0.1154	EGF
keratinocyte differentiation	0.159066	0.0043	47	1	0.1519	0.1519	EGF
map kinase inactivation of smrt corepressor	0.159066	0.0017	18	1	0.0611	0.0611	EGF
role of egf receptor transactivation by gpcrs in cardiac hypertrophy	0.159066	0.0029	31	1	0.1029	0.1029	EGF
Signaling by ERBB4	0.159066	0.0039	42	1	0.1368	0.1368	EGF
Signaling events mediated by TCPTP	0.159066	0.0032	35	1	0.1154	0.1154	EGF
5HT2 type receptor mediated signaling pathway	0.140305	0.0024	26	1	0.087	0.087	CACNA1S
Beta1 adrenergic receptor signaling pathway	0.140305	0.0025	27	1	0.0902	0.0902	CACNA1S
Bile secretion	0.132693	0.0065	71	1	0.2205	0.2205	LDLR
Lipid digestion, mobilization, and transport	0.132693	0.0084	91	1	0.2735	0.2735	LDLR
Ovarian steroidogenesis	0.132693	0.0046	50	1	0.1607	0.1607	LDLR
srebp control of lipid synthesis	0.132693	0.0006	7	1	0.0242	0.0484	LDLR

## Sheet: Sheet2
Pathway_Name	Pathway_Weight_Coefficient	RatioOfProteinInGeneSet	NumberOfProteinInGeneSet	ProteinFromNetwork	P-value	FDR	Nodes
Cardiac conduction	30643.9	0.0098	107	6	1.9196e-06	0.00025146	TNNI3,CACNA1S,SCN5A,KCNH2,KCNJ11,CALM1
Type II diabetes mellitus	28228.6	0.0044	48	3	0.00064757	0.0082468	CACNA1B,KCNJ11,ABCC8
FOXA2 and FOXA3 transcription factor networks	27636.6	0.0037	40	5	3.0651e-07	8.0611e-05	TTR,HNF4A,AKT1,KCNJ11,ABCC8
Insulin secretion	27635.8	0.0078	85	4	0.00022341	0.0044682	CHRM3,CACNA1S,KCNJ11,ABCC8
Integration of energy metabolism	27635.7	0.0085	92	3	0.0041026	0.0181	CHRM3,KCNJ11,ABCC8
DAP12 interactions	16807.5	0.0297	323	6	0.00083973	0.0083973	AKT1,JAK2,EGF,PTPN11,CALM1,TP53
Fc epsilon receptor (FCERI) signaling	16807.5	0.0373	405	6	0.002649	0.0139	AKT1,JAK2,EGF,PTPN11,CALM1,TP53
Signaling by EGFR	16807.5	0.0292	317	6	0.00076191	0.0083862	AKT1,JAK2,EGF,PTPN11,CALM1,TP53
Signaling by Interleukins	16807.5	0.0423	460	6	0.0049444	0.0198	AKT1,JAK2,EGF,PTPN11,CALM1,TP53
Signaling by PDGF	16807.5	0.0302	328	6	0.00090918	0.0090785	AKT1,JAK2,EGF,PTPN11,CALM1,TP53
Signaling by SCF-KIT	16807.5	0.0267	290	6	0.00047834	0.007175	AKT1,JAK2,EGF,PTPN11,CALM1,TP53
Signalling by NGF	16807.5	0.0387	421	6	0.003209	0.016	AKT1,JAK2,EGF,PTPN11,CALM1,TP53
Herpes simplex infection	16018.5	0.017	185	4	0.0039076	0.0181	JAK2,PTPN11,IFNG,TP53
Measles	15935.5	0.0125	136	4	0.0012893	0.0108	AKT1,JAK2,IFNG,TP53
PI3K-Akt signaling pathway	15933.9	0.0314	341	4	0.0307	0.0511	AKT1,JAK2,EGF,TP53
Signaling by the B Cell Receptor (BCR)	14774.8	0.0248	270	5	0.0023996	0.0139	AKT1,EGF,PTPN11,CALM1,TP53
Neurotrophin signaling pathway	14774.6	0.0111	121	4	0.00083862	0.0083862	AKT1,PTPN11,CALM1,TP53
Glioma	14691.5	0.0061	66	4	8.5154e-05	0.0027444	AKT1,EGF,CALM1,TP53
MAPK signaling pathway	14495	0.0235	255	5	0.0018728	0.0131	CACNA1B,AKT1,CACNA1S,EGF,TP53
Pathways in cancer	14081.6	0.0365	397	6	0.0023985	0.0139	AKT1,SMAD3,EGF,CTNNB1,PPARG,TP53
Generic Transcription Pathway	14080.8	0.0455	494	5	0.0279	0.0511	HNF4A,AKT1,SMAD3,PPARG,TP53
Chronic myeloid leukemia	14080.2	0.0067	73	4	0.00012524	0.0031309	AKT1,SMAD3,PTPN11,TP53
Colorectal cancer	13998	0.0057	62	4	6.6979e-05	0.0027444	AKT1,SMAD3,CTNNB1,TP53
HTLV-I infection	13998	0.0237	258	4	0.0123	0.033	AKT1,SMAD3,CTNNB1,TP53
Wnt signaling pathway	13997.7	0.0132	143	3	0.0136	0.033	SMAD3,CTNNB1,TP53
Pancreatic cancer	13997.1	0.0061	66	4	8.5154e-05	0.0027444	AKT1,SMAD3,EGF,TP53
Hepatitis B	13997	0.0134	146	3	0.0144	0.033	AKT1,SMAD3,TP53
Huntington's disease	13988.2	0.0178	193	4	0.0045374	0.0181	SDHA,SOD1,PPARG,TP53
AP-1 transcription factor network	13986.8	0.0064	70	4	0.00010668	0.0030937	GJA1,IFNG,CTNNB1,TP53
Proteoglycans in cancer	13985.4	0.0189	205	4	0.0056059	0.0224	AKT1,PTPN11,CTNNB1,TP53
Thyroid cancer	13985.3	0.0027	29	3	0.00014949	0.0034383	CTNNB1,PPARG,TP53
Longevity regulating pathway	13984.5	0.0087	94	3	0.0043552	0.0181	AKT1,PPARG,TP53
PIP3 activates AKT signaling	13984.5	0.0102	111	4	0.0006089	0.0079221	AKT1,EGF,PTPN11,TP53
Apoptosis	13984.2	0.0129	140	3	0.0129	0.033	LMNA,AKT1,TP53
Epstein-Barr virus infection	13902.8	0.0188	204	3	0.0343	0.0511	AKT1,IFNG,TP53
Glucocorticoid receptor regulatory network	13902.8	0.0072	78	3	0.0025856	0.0139	AKT1,IFNG,TP53
Breast cancer	13902.3	0.0134	146	4	0.0016702	0.0131	AKT1,EGF,CTNNB1,TP53
Endometrial cancer	13902.3	0.0048	52	4	3.3981e-05	0.001767	AKT1,EGF,CTNNB1,TP53
Prostate cancer	13902.3	0.0082	89	4	0.00026586	0.0047854	AKT1,EGF,CTNNB1,TP53
p53 pathway feedback loops 2	13902.1	0.0022	24	3	8.5761e-05	0.0027444	AKT1,CTNNB1,TP53
Thyroid hormone signaling pathway	13902.1	0.0109	118	3	0.0081347	0.0244	AKT1,CTNNB1,TP53
Hepatitis C	13901.4	0.0122	133	4	0.0011881	0.0107	AKT1,LDLR,EGF,TP53
Melanoma	13901.2	0.0065	71	3	0.0019831	0.0139	AKT1,EGF,TP53
Non-small cell lung cancer	13901.2	0.0052	56	3	0.0010087	0.0090785	AKT1,EGF,TP53
Adrenergic signaling in cardiomyocytes	6920.49	0.0137	149	7	7.9175e-07	0.00013856	AKT1,TNNI3,CACNA1S,SCN5A,TNNC1,TNNT2,CALM1
Dilated cardiomyopathy	6137.06	0.0083	90	5	1.5573e-05	0.001168	LMNA,TNNI3,CACNA1S,TNNC1,TNNT2
Hypertrophic cardiomyopathy (HCM)	6137.06	0.0076	83	5	1.0574e-05	0.00091998	LMNA,TNNI3,CACNA1S,TNNC1,TNNT2
Cardiac muscle contraction	6053.92	0.0072	78	4	0.00016121	0.0035466	TNNI3,CACNA1S,TNNC1,TNNT2
Striated Muscle Contraction	6053.78	0.0029	31	3	0.00018173	0.0038162	TNNI3,TNNC1,TNNT2
Calcium signaling pathway	3402.79	0.0167	182	5	0.00041724	0.0064189	CHRM3,CACNA1B,CACNA1S,TNNC1,CALM1
IFN-gamma pathway	2908.23	0.0037	40	5	3.0651e-07	8.0611e-05	AKT1,JAK2,PTPN11,IFNG,CALM1
Signaling by Insulin receptor	2906.69	0.0255	277	5	0.0026793	0.0139	AKT1,JAK2,EGF,PTPN11,CALM1
Signaling by Type 1 Insulin-like Growth Factor 1 Receptor (IGF1R)	2906.69	0.0235	255	5	0.0018728	0.0131	AKT1,JAK2,EGF,PTPN11,CALM1
RET signaling	2906.43	0.0204	222	4	0.0073911	0.0225	JAK2,EGF,PTPN11,CALM1
Signaling by Leptin	2906.43	0.0192	209	4	0.0059966	0.0225	JAK2,EGF,PTPN11,CALM1
cAMP signaling pathway	2891.77	0.0184	200	5	0.00063883	0.0082468	AKT1,TNNI3,CACNA1S,TSHR,CALM1
Tuberculosis	2824.96	0.0165	179	4	0.0034763	0.0174	AKT1,JAK2,IFNG,CALM1
Gastrin-CREB signalling pathway via PKC and MAPK	2823.93	0.0346	376	4	0.0416	0.0511	CHRM3,JAK2,EGF,CALM1
Signaling by VEGF	2823.43	0.0264	287	4	0.0176	0.0351	AKT1,JAK2,EGF,CALM1
NCAM signaling for neurite out-growth	2823.3	0.0213	231	4	0.0084732	0.0254	CACNA1S,JAK2,EGF,CALM1
RAF/MAP kinase cascade	2823.16	0.0185	201	3	0.033	0.0511	JAK2,EGF,CALM1
Cholinergic synapse	2627.54	0.0102	111	5	4.214e-05	0.0019806	CHRM3,CACNA1B,AKT1,CACNA1S,JAK2
Th17 cell differentiation	2130.29	0.0098	107	3	0.0062268	0.0225	JAK2,SMAD3,IFNG
Signaling pathways regulating pluripotency of stem cells	2129.88	0.0131	142	4	0.0015096	0.0121	AKT1,JAK2,SMAD3,CTNNB1
AGE-RAGE signaling pathway in diabetic complications	2129.31	0.0093	101	4	0.00042793	0.0064189	AKT1,JAK2,SMAD3,COL3A1
Jak-STAT signaling pathway	2117.93	0.0145	158	4	0.0022234	0.0139	AKT1,JAK2,PTPN11,IFNG
SHP2 signaling	2117.83	0.0047	51	4	3.152e-05	0.001767	JAK2,EGF,PTPN11,IFNG
Interferon gamma signaling	2117.67	0.0067	73	3	0.0021451	0.0139	JAK2,PTPN11,IFNG
Interferon-gamma signaling pathway	2117.67	0.0014	15	3	2.1397e-05	0.0013908	JAK2,PTPN11,IFNG
GPCR downstream signaling	2116.88	0.0842	915	4	0.3993	0.3993	CHRM3,AKT1,JAK2,TSHR
Adipocytokine signaling pathway	2116.23	0.0064	70	3	0.001905	0.0133	AKT1,JAK2,PTPN11
CXCR4-mediated signaling events	2116.23	0.0074	80	3	0.0027762	0.0139	AKT1,JAK2,PTPN11
ErbB2/ErbB3 signaling events	2116.23	0.0034	37	3	0.00030455	0.0048728	AKT1,JAK2,PTPN11
GPVI-mediated activation cascade	2116.23	0.0045	49	3	0.00068723	0.0082468	AKT1,JAK2,PTPN11
IL6-mediated signaling events	2116.23	0.0043	47	3	0.00060939	0.0079221	AKT1,JAK2,PTPN11
Signaling events mediated by Stem cell factor receptor (c-Kit)	2116.23	0.0048	52	3	0.00081544	0.0083862	AKT1,JAK2,PTPN11
Toxoplasmosis	2034.8	0.0109	118	4	0.00076419	0.0083862	AKT1,JAK2,LDLR,IFNG
Inflammation mediated by chemokine and cytokine signaling pathway	2034.66	0.0065	71	3	0.0019831	0.0139	AKT1,JAK2,IFNG
Influenza A	2034.66	0.0161	175	3	0.0232	0.0463	AKT1,JAK2,IFNG
Endothelins	2033.42	0.0057	62	3	0.0013493	0.0108	AKT1,JAK2,COL3A1
EGFR tyrosine kinase inhibitor resistance	2033.13	0.0075	81	3	0.0028748	0.0144	AKT1,JAK2,EGF
Signaling events mediated by PTP1B	2033.13	0.0048	52	3	0.00081544	0.0083862	AKT1,JAK2,EGF
Dopaminergic synapse	1553.3	0.012	130	4	0.0010926	0.0098332	CACNA1B,AKT1,KCNJ5,CALM1
Heterotrimeric G-protein signaling pathway-Gi alpha and Gs alpha mediated pathway	960.146	0.0135	147	3	0.0147	0.033	CHRM3,KCNJ5,CALM1
Estrogen signaling pathway	959.641	0.0092	100	3	0.0051687	0.0207	AKT1,KCNJ5,CALM1
Oxytocin signaling pathway	959.517	0.0146	159	3	0.018	0.0361	CACNA1S,KCNJ5,CALM1
N-cadherin signaling events	957.884	0.003	33	4	5.7797e-06	0.00060687	GJA1,PTPN11,CTNNB1,CALM1
Calcineurin-regulated NFAT-dependent transcription in lymphocytes	875.455	0.0042	46	3	0.00057269	0.0079221	IFNG,PPARG,CALM1
Signaling events mediated by VEGFR1 and VEGFR2	874.848	0.0058	63	4	7.1228e-05	0.0027444	AKT1,PTPN11,CTNNB1,CALM1
Ras signaling pathway	873.986	0.0211	229	4	0.0082243	0.0247	AKT1,EGF,PTPN11,CALM1
IL2 signaling events mediated by PI3K	873.827	0.0032	35	3	0.00025903	0.0046626	AKT1,PTPN11,CALM1
VEGFR1 specific signals	873.827	0.0025	27	3	0.00012123	0.0031309	AKT1,PTPN11,CALM1
Response to elevated platelet cytosolic Ca2+	792.432	0.0098	106	3	0.0060683	0.0225	EGF,SOD1,CALM1
Alzheimer's disease	792.428	0.0157	171	3	0.0218	0.0436	CACNA1S,SDHA,CALM1
Rap1 signaling pathway	791.741	0.0195	212	4	0.0063012	0.0225	AKT1,EGF,CTNNB1,CALM1
Visual phototransduction	791.432	0.0076	83	3	0.0030782	0.0154	TTR,LDLR,CALM1
ErbB1 downstream signaling	790.721	0.0092	100	3	0.0051687	0.0207	AKT1,EGF,CALM1
cGMP-PKG signaling pathway	790.702	0.0155	168	3	0.0208	0.0417	AKT1,CACNA1S,CALM1
Aldosterone synthesis and secretion	790.571	0.0075	82	3	0.0029754	0.0149	CACNA1S,LDLR,CALM1
Heterotrimeric G-protein signaling pathway-Gq alpha and Go alpha mediated pathway	763.506	0.0099	108	3	0.0063877	0.0225	CHRM3,CACNA1B,KCNJ5
Retrograde endocannabinoid signaling	762.877	0.0093	101	3	0.0053126	0.0213	CACNA1B,CACNA1S,KCNJ5
Serotonergic synapse	762.877	0.0104	113	3	0.0072297	0.0225	CACNA1B,CACNA1S,KCNJ5
Arrhythmogenic right ventricular cardiomyopathy (ARVC)	167.602	0.0066	72	4	0.00011881	0.0031309	GJA1,LMNA,CACNA1S,CTNNB1
Regulation of Telomerase	98.0081	0.0063	68	4	9.5477e-05	0.0028643	AKT1,SMAD3,EGF,IFNG
Chagas disease (American trypanosomiasis)	97.849	0.0096	104	3	0.0057587	0.0225	AKT1,SMAD3,IFNG
HIF-1-alpha transcription factor network	96.5402	0.006	65	3	0.0015437	0.0123	HNF4A,AKT1,SMAD3
Regulation of nuclear SMAD2/3 signaling	96.5402	0.0071	77	3	0.0024934	0.0139	HNF4A,AKT1,SMAD3
FoxO signaling pathway	96.3128	0.0123	134	3	0.0115	0.033	AKT1,SMAD3,EGF
Endocytosis	96.1816	0.0239	260	3	0.0622	0.0622	LDLR,SMAD3,EGF
Osteoclast differentiation	85.4209	0.0121	132	3	0.011	0.033	AKT1,IFNG,PPARG
Signaling events mediated by Hepatocyte Growth Factor Receptor (c-Met)	84.5504	0.0074	80	3	0.0027762	0.0139	AKT1,PTPN11,CTNNB1
AMPK signaling pathway	84.1121	0.0114	124	3	0.0093055	0.0279	HNF4A,AKT1,PPARG
Phospholipase D signaling pathway	83.6887	0.0133	144	3	0.0139	0.033	AKT1,EGF,PTPN11
Metabolic pathways	8.0515	0.1165	1266	6	0.2782	0.2782	PON1,KYNU,GAA,SDHA,DAO,NAGS
HIF-1 signaling pathway	2.11824	0.0095	103	3	0.0056076	0.0224	AKT1,EGF,IFNG
Focal adhesion	1.44376	0.0185	201	3	0.033	0.0511	AKT1,EGF,CTNNB1
